# Supplementary material for: Hypothalamic deiodinase type-3 establishes the period of circannual interval timing in mammals
Source: bioRxiv preprint, doi:10.1101/2025.04.22.650143, version 3 (2025-09-12)
Supplement: Dataset S1 [file 650143_file06.xlsx]

## Sheet: EdgeR
	logFC.Group12wk	logFC.Group16wk	logFC.Group20wk	logFC.Group24wk	logFC.Group28wk	logFC.Group32wk	logFC.Group4wk	logFC.Group8wk	logCPM	F	PValue	FDR
Tshb	-9.19008	-7.55001	-8.9201	-5.93128	-4.83668	-5.51123	-5.15173	-7.53302	5.65237	29.3725	9.09317e-17	2.177e-12
Upp2	-7.5981	-7.5981	-6.49751	-7.5981	-6.07619	-3.82382	-3.42754	-7.5981	1.39198	13.4247	2.49081e-08	0.000239699
Shox2	0	1.38592	7.27198	0	1.22312	1.22435	1.12432	1.37727	0.97584	11.9186	3.00363e-08	0.000239699
Prl	-2.29343	-2.3249	-3.8019	-5.1935	5.03713	-2.06935	0.796816	-3.07422	3.31947	10.0262	4.84424e-08	0.000260248
Prr5l	-0.501709	-0.413752	-0.686638	3.99917	-0.792599	2.15357	4.59147	0.414197	1.09525	9.48483	5.4352e-08	0.000260248
Sugct	1.59682	0.0838063	-0.215522	-0.522512	-0.744063	-1.63382	1.9405	2.10925	2.78143	8.51857	2.43833e-07	0.000972936
Dhrs7c	3.45102	2.81036	2.22303	1.45045	-0.181809	-0.630745	3.45613	3.78445	1.62762	8.20865	4.01537e-07	0.00137331
Chrna3	2.74776	2.36981	1.82897	1.11721	1.13339	1.12007	3.04734	3.40333	3.05675	7.94654	6.16516e-07	0.001845
Accs	-1.36603	-2.41975	2.48486	-1.99282	3.15335	1.38254	-2.66575	-2.40656	1.50585	7.81286	7.69114e-07	0.00204593
Osbp2	5.87002	2.31977	-1.21672	3.07135	-0.229764	0.0401265	0.474777	0.160504	1.09893	7.85773	1.17618e-06	0.00281589
Nmu	-5.42709	-3.43476	-2.78942	-5.42709	-5.42709	-3.51943	-0.607069	-4.05121	0.726202	8.58183	1.4967e-06	0.0032575
Ccdc163	0	1.38639	1.33296	6.30921	0	4.12595	3.30516	2.09722	0.872971	7.35729	7.83122e-06	0.0149069
Gcgr	-1.11497	2.44479	-1.11497	0.0870186	-1.11497	-0.00457913	2.19499	4.89223	0.693149	7.33384	8.09448e-06	0.0149069
Npas1	0.4868	0.576504	-1.41552	3.59473	-0.456509	-1.41552	0.236083	0.681407	0.423783	6.7768	1.06983e-05	0.0182949
Plac1	-5.14573	-1.68706	-3.7994	-4.61854	-1.64208	-3.30171	-2.91607	-5.1615	1.19418	6.24122	1.1834e-05	0.0188879
Cby2	4.85432	1.36565	1.8437	0	1.22515	0	2.89367	6.23408	0.843566	7.00268	1.29867e-05	0.0189074
Gm16867	3.40673	-1.32518	1.52348	-0.123098	-0.0501921	4.71603	0.359434	0.830375	0.849272	6.37382	1.34258e-05	0.0189074
Stard9	1.30776	1.99133	5.05349	0	0	1.92034	2.17441	0	0.37737	7.37437	1.50523e-05	0.0200204
Arntl2	-4.06255	-4.06255	-2.69146	1.36631	2.71671	2.2649	-0.549282	-2.70995	1.54747	6.40672	1.93155e-05	0.0243386
Prr32	3.81497	3.16395	2.70944	2.17485	2.26047	1.88042	4.01153	4.92462	1.23991	5.80466	2.64761e-05	0.0311056
Sema6c	-3.4674	-4.44248	-4.44837	-0.308973	-3.68526	-4.69292	-3.7961	0.398394	1.29444	5.76798	2.83567e-05	0.0311056
Rbp1	-1.80519	-1.7768	-1.83007	-1.959	-1.28889	-1.31572	-1.12061	-1.78401	3.21308	5.75513	2.90473e-05	0.0311056
Ikbkg	1.98169	5.41044	1.63591	1.99831	5.1979	0	1.90615	0	0.749436	6.43722	2.9883e-05	0.0311056
Platr25	-1.67507	-6.2687	-5.17149	-0.516246	-1.26433	-4.39094	-5.34628	-4.89023	1.27566	5.88576	3.14625e-05	0.0313852
Tfpi2	0.00503437	0.211955	4.00249	2.18772	-0.244368	-1.21411	3.2337	1.9009	0.637108	5.82911	3.4791e-05	0.0325085
Sh3tc1	-1.2858	-4.00065	-5.36634	-3.58122	-1.59	-4.25042	-2.05476	0.333797	0.977064	5.81454	3.57044e-05	0.0325085
A630039O03Rik	0	0	1.07526	0	0	2.31148	6.6847	1.49697	0.583997	7.2411	3.87374e-05	0.0325085
Zic4	2.50064	1.27985	1.90334	5.97991	0.975992	1.33282	4.61348	1.42447	0.749041	5.7683	3.87721e-05	0.0325085
Prr18	3.30098	-1.95874	-0.121031	-0.694371	-1.95874	-0.608187	0.69048	-0.620191	0.45448	5.96893	3.96136e-05	0.0325085
Wdr93	0.108263	0.258634	-1.10674	-1.10674	-1.10674	-0.0022431	3.47606	3.35223	0.464356	6.23275	4.07357e-05	0.0325085
Dio3	2.9055	2.63415	0	0	0	0	3.6237	4.85081	0.46653	6.96492	5.36248e-05	0.0413619
Efcab5	1.3612	5.80463	0	1.124	0.967611	0	3.5137	2.09764	0.575153	6.03412	5.52851e-05	0.0413619
Plxnb3	-0.470927	0.180184	-0.0101088	-1.84899	-0.154308	2.36737	2.98815	-1.84899	0.512769	5.74576	5.76065e-05	0.0415794
Adamts18	1.21508	0	1.34298	0	6.03082	0	0.894657	0	0.466327	6.88426	5.90494e-05	0.0415794
Zfp809	-1.32818	0.0325794	0.54014	1.54531	3.26088	-0.77609	0.133016	-2.60425	0.794639	5.51502	6.11606e-05	0.0418356
Islr2	-3.19654	-3.09499	1.18109	-4.4747	0.93962	1.29945	-3.35198	-3.12581	1.19811	5.47778	6.54394e-05	0.043519
Cga	-3.24688	-3.53359	-3.43086	-3.85517	-1.6498	-2.62855	-3.07764	-3.60967	7.44697	5.3099	6.76408e-05	0.0437672
Ccdc15	0.995513	-4.11577	-0.457318	-1.7769	-2.08351	2.99007	0.51512	-4.11577	1.46875	5.62119	7.11745e-05	0.0448418
Nt5c1b	1.82902	-3.82847	-2.74212	1.08606	-3.82847	-1.47679	-2.58484	-2.4518	0.850656	5.56815	7.7924e-05	0.0478354
Zbtb7b	2.0078	4.3682	1.8899	0.94586	-1.33284	-1.33284	-0.123864	-1.33284	0.624209	5.78647	8.14162e-05	0.0487296
Gm30439	1.27231	4.86273	2.88927	1.26546	2.3086	1.11962	0	1.37324	0.421732	5.48252	9.02607e-05	0.0514683
Hspb7	3.86709	3.72162	4.08587	1.89619	1.48817	1.22696	4.1011	4.59782	0.691705	5.30171	9.02915e-05	0.0514683
Gm26803	1.35386	5.86826	1.39198	1.20216	3.9067	4.43969	5.53342	1.34796	1.07998	5.28368	9.33378e-05	0.0519674
Tulp2	-4.81607	-1.98223	0.724724	-4.81607	-4.81607	-3.11931	-3.41215	-2.81574	0.731594	5.59253	0.000110793	0.0602839
Vwa3a	-2.06038	3.85663	1.99972	2.65254	0.860934	-2.06038	-2.06038	-0.00436602	0.877479	5.57409	0.000114113	0.0607104
Sema3b	-4.15351	0.964491	-2.75867	-2.87397	-0.30899	1.67203	-4.15351	-2.80648	0.985724	5.19672	0.000148337	0.0764015
Mro	-4.49176	0.256179	-2.14451	-0.147283	0.500687	-6.56193	-1.80407	-4.5161	2.16854	5.0154	0.000153569	0.0764015
Eps8l1	-1.3265	-0.0454924	4.26865	3.8916	-0.348514	3.12921	-1.3265	0.0975675	0.79707	5.17093	0.000155214	0.0764015
Eif2s3y	-4.43337	-5.7962	-5.7962	-4.67403	-5.7962	-5.7962	-3.95384	-5.7962	0.493427	6.09809	0.000156371	0.0764015
Fbf1	-0.13543	1.60232	1.56133	1.73306	-4.54899	1.37793	-1.27984	-4.36625	2.69528	4.85824	0.000163073	0.077851
Actr5	5.52797	0	0	1.20164	0.955291	0	0	0	0.387178	6.72217	0.000166039	0.077851
Crabp1	-1.41701	-0.579949	-0.219294	-0.0370861	0.597132	0.217253	-2.09569	-1.45815	4.8491	4.83219	0.000171682	0.077851
Aif1l	-1.75483	-2.70742	-1.54599	-1.10633	-0.900761	-0.218898	-1.12215	-1.19128	1.96632	4.83024	0.000172345	0.077851
Gm7560	-4.76603	-3.50207	-4.76603	-2.25641	-4.76603	-3.66854	-3.07449	-3.39445	0.33995	5.29522	0.000179224	0.0794594
Kif14	-3.65311	-4.86087	-4.86087	-3.65939	-3.62161	-3.62818	-4.86087	-4.86087	0.326654	5.55952	0.000184324	0.0802344
Grin2c	-1.09464	-1.09464	2.58714	-1.09464	-1.09464	0.0191486	-0.215341	-1.09464	0.160428	5.93563	0.00019281	0.0811311
Nlgn4l	1.95318	1.36512	1.05974	0	0	4.97532	0	0	0.356588	5.93423	0.000193161	0.0811311
Neb	-2.12637	-9.5357	-9.5357	-7.68894	-1.99519	-8.32257	-2.8197	-9.5357	3.2649	5.23183	0.000198854	0.0813919
Evc2	1.92346	-2.36487	2.56925	-1.16497	2.36526	0.969435	-1.23784	-2.36487	0.708827	5.02581	0.000200581	0.0813919
Ttf2	-3.15912	-3.15912	1.31863	0.858456	2.45138	-3.15912	-0.499512	-1.78348	0.773191	5.21143	0.00020564	0.0820537
Tpcn2	0.969829	0.254226	0.293046	-1.11126	1.904	0.116894	4.08856	0.941178	0.592231	4.84011	0.00021358	0.0838248
Plekhg3	2.47158	1.01758	2.87425	-0.176994	4.76099	-0.245106	3.95482	2.44185	1.1196	4.70344	0.000221629	0.0846321
Adgrg2	5.40008	-2.27645	-2.27645	3.79762	2.8625	3.08134	3.65058	-0.0829819	2.01688	4.96395	0.000223918	0.0846321
Ccdc158	0.0338777	0.000788462	-1.27277	3.23045	0.482111	-0.166586	3.19735	0.100912	0.519896	4.79095	0.000234426	0.0846321
Oxt	-1.39925	-1.56089	1.86682	-1.4752	-1.33587	-1.36156	-0.159821	-2.88169	3.75993	4.67454	0.000234765	0.0846321
Lama1	2.09691	-0.119524	0.949144	-1.04831	-2.25006	-2.25006	0.153487	1.04388	0.443613	4.92578	0.000239709	0.0846321
Pglyrp2	-1.21038	-1.21038	0.139576	-1.21038	-0.261902	-0.0954511	3.57239	-1.21038	0.295138	5.37115	0.00024417	0.0846321
Gm20515	-3.45427	-3.33666	-5.41086	-5.41086	-4.17842	-5.41086	-1.84003	-3.98299	0.589078	5.09595	0.000248885	0.0846321
Rbm12b2	-1.09672	-1.09672	-1.09672	3.20293	-1.09672	0.269863	1.93758	0.236908	0.312935	5.35778	0.000249134	0.0846321
Kcnj12	1.27497	1.27764	4.63509	5.13775	3.0488	2.78969	2.88458	2.64201	0.676004	4.754	0.000251475	0.0846321
Frem1	-5.31823	-3.9365	-1.31376	-3.39369	-4.03386	-3.42083	-2.53129	-5.31823	0.636454	4.89681	0.000252465	0.0846321
Catsperg1	0.767145	-1.32251	1.39308	4.98407	0.423743	-1.32251	2.86277	3.06727	0.971062	4.89228	0.000254522	0.0846321
Ano1	1.15161	-1.39276	-1.39276	-0.190732	-0.165647	4.88671	3.11565	-1.39276	0.74181	5.0729	0.000258602	0.084811
Wdr62	1.37127	1.38098	5.29395	0	0	0	5.91097	2.15739	0.77109	5.32238	0.000262796	0.0850214
Tbc1d4	-5.49423	0.419547	-1.06159	-4.36195	-4.22356	-4.23604	-1.53957	-3.46308	1.00179	4.69594	0.000280888	0.0896632
Sphk1	0	4.54517	0	5.03722	0	1.10588	0.896965	0	0.50815	5.60295	0.000298859	0.0941446
Rbm12b1	0	0	3.39463	3.31302	1.69144	0	4.49165	1.37303	0.408356	5.22756	0.000303419	0.0943397
1700019D03Rik	0.736816	-3.01579	-3.04855	-0.105432	-4.38145	-3.25218	0.540207	-4.38145	0.876955	4.77179	0.000316125	0.0970302
Tnnt3	-6.77077	-6.76619	-8.07519	-3.17476	-0.0757167	-3.14657	-3.13277	-2.65382	2.50815	4.61953	0.000325098	0.0980449
Zfp628	0	1.39113	0	0	1.31351	4.24451	0.881321	2.41638	0.274617	5.17723	0.000327622	0.0980449
Lair1	3.42739	3.0506	-1.32843	-0.200631	-0.0393875	0.499695	-0.421431	3.80709	0.734452	4.59947	0.000337853	0.0995689
Ppp1r1b	-1.08932	-1.31763	-1.35001	-0.690812	0.335531	-0.000240874	-0.979327	-1.07088	4.54237	4.48819	0.000341032	0.0995689
Hfm1	-4.16736	-4.16736	-2.3343	-4.16736	-4.16736	-4.16736	-3.28621	-2.15188	0.264075	5.47931	0.000352886	0.101788
Cdca2	-1.27673	-1.27673	-1.27673	-0.162672	-1.27673	0.0015348	2.64603	0.0564518	0.244115	5.05673	0.000394211	0.112251
Mlip	-3.24589	-3.24589	-1.05248	-3.24589	-3.24589	2.00309	-2.11676	-1.8194	0.531956	5.04915	0.000398848	0.112251
Ccdc162	-5.82681	-5.82681	-5.82681	-2.06067	-5.82681	-5.82681	-4.92841	-5.82681	0.540343	5.90861	0.000406391	0.112251
Pkn3	-1.96314	-0.527273	-1.96314	-0.848899	-1.96314	-0.848437	-1.96314	2.68965	0.265556	5.03309	0.000408867	0.112251
Zfp536	2.94171	-2.24088	1.87495	0.857978	-1.20492	0.13626	3.1641	1.78339	2.27316	4.38992	0.000415879	0.112251
Adamts16	-3.91303	0.310314	1.94965	-2.7109	2.01884	-3.91303	-3.91303	-3.91303	1.00566	5.01784	0.000418631	0.112251
Lsmem2	2.3125	-2.00903	2.18639	-2.00903	-0.529894	-0.901875	1.52038	1.9957	0.56179	4.61273	0.000421979	0.112251
Glb1l2	-1.10833	0.280483	-1.10833	2.2357	-1.10833	4.43112	-1.10833	-1.10833	0.499749	5.32823	0.000433402	0.11353
Fkbp6	0.958179	-1.43015	-0.372745	-1.43015	0.0216523	-0.197387	3.09747	0.0808892	0.307125	4.5945	0.00043627	0.11353
Cryab	0.76642	0.417106	0.0133806	-0.0914265	-0.673101	0.0575372	0.551951	1.50521	4.79209	4.3392	0.00046092	0.117836
B3galt5	3.33737	2.08675	3.25594	5.29489	0	0	1.21123	2.33583	0.549603	4.72752	0.00046266	0.117836
Incenp	0.0903845	1.94045	3.83149	-0.0853087	3.67702	1.97818	4.0943	-1.21584	0.882841	4.41996	0.000477723	0.119406
Myo9b	1.22774	5.11021	5.76356	1.27846	1.27842	4.13791	4.9732	0	1.04905	4.54368	0.000478802	0.119406
Filip1l	2.95045	4.58552	3.45725	0	2.79313	0	1.13056	1.37274	0.432663	4.69564	0.000488552	0.119676
Gm14322	2.41055	0	1.83318	1.1144	0	4.0565	1.27206	1.33345	0.284727	4.69405	0.000489882	0.119676
Lhx6	0.949476	-1.82146	0.0811135	3.15403	0.205758	2.65424	4.02534	-1.82146	0.898858	4.49704	0.000521623	0.126143
Gpr160	0.273422	-1.0964	-1.0964	0.206076	3.055	-1.0964	0.554433	-1.0964	0.285958	4.82925	0.000561807	0.133947
Zdhhc23	-4.69018	-5.91798	-4.82609	-5.91798	-0.670243	-1.14248	-2.56406	-1.92236	1.0537	4.44928	0.000569597	0.133947
Washc1	1.20801	2.71568	1.8983	1.11496	0	1.6895	1.13276	4.57873	0.345589	4.44825	0.000570677	0.133947
Trpm2	-0.330675	-1.59292	1.76167	1.27354	-0.0662187	2.33208	-1.74766	-2.87372	0.787724	4.31709	0.000583596	0.135649
Runx2	0	5.16897	0	4.03003	0.966371	1.12299	0	3.52929	0.543635	4.78083	0.000606324	0.138458
Prss36	-4.6817	-4.6817	-3.3319	-3.37953	-4.6817	-3.44897	-4.6817	-4.6817	0.315091	5.08464	0.000607245	0.138458
Psd4	-2.86595	-2.90867	-4.17293	-4.17293	-3.22327	-4.17293	-0.466011	-4.17293	0.347001	4.76045	0.000626156	0.140348
Gm31614	-1.2103	-1.2103	1.02841	3.11703	-1.2103	0.0226037	-1.2103	0.123051	0.269074	4.75934	0.000627261	0.140348
Cyth1	2.4372	1.17834	2.96191	-1.83931	-0.496193	1.76196	2.87031	-1.68885	1.36739	4.17487	0.000644309	0.142828
Clcn1	3.38265	6.39262	5.70171	3.61362	1.95414	4.17514	3.18027	1.34804	1.08924	4.24605	0.000670578	0.147287
Ceacam1	-1.34764	-1.34764	-1.34764	2.88464	-1.34764	1.82212	-1.34764	0.667605	0.312736	4.99675	0.000687067	0.148556
Cfap100	-3.60056	-3.55026	-1.55444	-3.77824	-4.97789	-2.70061	-2.59358	-3.4806	0.540206	4.2318	0.000689581	0.148556
LOC115486519	-5.22196	-0.739646	-1.47447	-1.95764	-5.22196	-1.2957	1.1535	-5.22196	1.16472	4.49105	0.000694971	0.148556
Pafah2	0.0483013	-1.34853	-1.34853	-1.34853	-0.401001	-1.34853	-0.467786	2.96193	0.239319	4.68149	0.000709682	0.150358
Cep152	1.40921	0.0536622	-2.95686	1.95652	-0.405707	-4.05014	-2.39674	-2.67286	1.11659	4.19825	0.000736529	0.154678
Abcc12	0	0	1.05587	1.30334	0.947015	0	0	4.20664	0.211258	4.88505	0.000804972	0.167581
Sting1	-1.76398	-3.71377	-3.71377	-2.5995	-3.71377	-3.71377	-0.605366	-2.28379	0.268834	4.58783	0.000824174	0.169577
Tnfrsf14	-1.16713	-3.04532	-0.570612	2.38488	-1.29262	-1.70304	0.396073	-1.70422	0.590944	4.13833	0.000828725	0.169577
Xaf1	-5.44102	-1.40125	-5.44102	-1.30862	-2.94265	-2.55722	-4.53431	-3.38662	0.728094	4.24197	0.000837149	0.169583
Vim	-1.24206	-1.42937	-1.63527	-1.48987	-0.970756	-1.02478	-0.965131	-1.28869	6.09274	4.04186	0.000846675	0.169583
Arap3	-1.26811	3.67025	0.118825	3.4241	4.5331	0.612886	3.15714	-1.26811	1.00687	4.23382	0.000850006	0.169583
Dnmt3b	0	1.365	4.0705	1.27042	0	0	0	0	0.209438	5.26149	0.000871328	0.171929
6030458C11Rik	-1.24628	-1.30994	-2.42007	-0.422255	1.01414	-0.161663	-2.38438	0.316224	1.04006	4.02246	0.00088122	0.171929
Oprm1	-2.56686	-1.59876	-1.02932	0.718929	1.4133	-1.10074	-3.22466	-1.0064	1.39733	4.02077	0.000884307	0.171929
Zfp474	-4.08445	-2.6955	0.254543	-4.08445	-4.08445	-4.08445	-0.464759	-2.71109	0.483562	4.53878	0.000891739	0.171929
Rbp4	-0.936643	-1.68818	-1.76278	-1.27469	-1.60356	-1.53472	-1.03801	-0.541132	4.23313	4.0135	0.000897669	0.171929
Deup1	1.20683	0	0	4.10357	0.94729	1.09646	1.56809	0	0.225973	4.5294	0.000905305	0.172015
Itgb6	2.46045	0	1.59749	0	0.947739	3.88237	1.13309	1.37062	0.251049	4.31638	0.000942888	0.17674
Phf19	-1.81586	1.98714	-1.81586	-0.613961	-1.81586	-0.112002	2.91151	2.74732	0.58322	4.3096	0.000954194	0.17674
Kif20b	1.36251	0	4.15505	1.26303	1.2974	4.83557	2.91062	0	0.507011	4.30667	0.00095912	0.17674
Klc3	1.38687	0	1.07062	4.40449	4.33676	3.46462	0	0	0.476584	4.48724	0.000969033	0.17674
Car7	-1.09636	0.167075	0.86684	0.929677	-1.09636	0.0184798	3.19202	-1.09636	0.282677	4.29819	0.000973531	0.17674
Egf	-1.27247	-1.27247	2.76246	-1.27247	-0.305882	-0.165592	3.58945	2.94473	0.54888	4.2941	0.000980573	0.17674
Pbx4	0.32653	-2.8286	-4.94861	-3.16824	-2.24904	-3.8387	-4.94861	-4.94861	0.677117	4.29336	0.000981849	0.17674
Zfp764	2.94462	-1.09636	2.19924	-1.09636	-1.09636	0.0184766	-1.09636	0.333575	0.283335	4.46967	0.000996967	0.178122
Tfpi	-4.7475	-3.32309	-4.7475	-1.3857	0.064198	-1.31596	-1.37136	-3.40439	0.697892	4.1293	0.00103424	0.182664
Gfra1	3.4525	3.26443	3.1163	4.7394	0.678256	3.53353	0.506561	-1.31886	1.17844	4.0197	0.0010479	0.182664
Abhd18	0.741196	0.575483	-3.10165	-1.82381	-1.82622	1.99126	2.06734	2.53871	1.08901	4.01777	0.00105192	0.182664
A2ml1	0.739559	0.9098	0.892459	3.19518	0.484112	0.592922	4.66291	2.68882	0.728897	3.93633	0.00105291	0.182664
Msh5	0	0	1.4185	1.19954	3.45056	5.37259	0	0	0.477304	4.67604	0.00108734	0.185675
Adora2a	1.36281	3.4085	4.56851	1.26332	0.963967	0	4.50957	1.33951	0.494287	4.09928	0.00109446	0.185675
Fndc1	4.07607	1.27339	4.29146	1.29161	4.00944	0	2.00735	0	0.51392	4.22859	0.00110072	0.185675
Casr	2.26057	-2.8032	-1.71657	1.5287	-0.455449	-2.8032	2.79356	-1.42648	0.860235	4.09456	0.00110426	0.185675
Meis2	-1.47794	-3.30036	1.61261	-0.895465	-1.86424	-0.44803	1.86192	-4.35631	2.23982	3.91126	0.00110904	0.185675
4930503B20Rik	3.46202	2.47533	0.855998	0.702038	0.0206543	-1.68796	1.05624	2.24993	1.24524	3.90424	0.00112529	0.187087
Arhgef15	1.20654	4.05582	1.05564	1.3035	0	0	0	0	0.198417	4.64248	0.00114174	0.188513
Gcnt1	-2.45503	-2.87203	-4.4093	0.147321	-1.4116	-3.30292	-3.15809	-4.4093	0.527364	4.06377	0.00117038	0.191918
Il15	4.37056	4.77277	0	4.98917	0	2.30791	6.04113	0	1.12045	4.36621	0.00117952	0.192101
Spata17	-0.355402	-0.360527	-1.75161	0.896939	-0.803123	2.4663	-1.75161	-1.75161	0.295728	4.18189	0.00119566	0.193414
Hspb2	1.84732	2.15509	1.5595	0.578677	0.682696	-2.84201	1.90484	2.13233	1.07708	3.94605	0.00121317	0.19493
Crhr1	-0.0601697	-0.00357796	-1.274	0.0208611	1.84952	3.29261	1.94869	-1.274	0.435211	4.03698	0.00123126	0.195218
Mogat1	0	1.36506	2.90405	1.7728	4.2877	0	2.40834	0	0.327493	4.33734	0.00123649	0.195218
Fignl1	-4.44127	-3.17731	-4.44127	-3.23979	-4.44127	-4.44127	-4.44127	-0.878166	0.339321	4.58497	0.00124178	0.195218
Fblim1	-0.474372	0.117968	-1.87041	-0.668938	-1.87041	2.40153	-0.598866	-1.87041	0.312009	4.15795	0.00124758	0.195218
Il16	-2.22808	-2.20338	0.879702	-3.5841	0.631707	-1.30025	-1.14045	2.03883	0.83692	3.92343	0.00126913	0.1973
Aspa	-2.0339	-5.96672	-3.97538	-0.986919	-0.330921	-0.659236	1.00529	-0.781104	2.90739	3.83752	0.00129257	0.199648
P2ry14	0.293141	2.09723	4.01863	4.63169	1.95885	4.62845	3.97668	2.83785	1.72448	3.82196	0.00133509	0.204894
Lhx9	-1.59522	-0.414847	3.11766	-0.974061	-1.5297	-1.70587	0.866378	1.03604	0.723207	3.81767	0.00134708	0.205417
Mocos	-3.48417	0.448067	-2.05014	-3.48417	-2.53532	-2.12951	-2.3513	-1.34603	0.318631	3.98354	0.00136263	0.206473
Stkld1	-1.09506	0.167336	-1.09506	-1.09506	-1.09506	-1.09506	2.58927	-1.09506	0.187521	4.88696	0.00138584	0.207683
Kcnmb2	-2.06863	-4.63892	-1.78329	-4.22037	-4.71736	-4.16353	-2.97349	-3.42062	0.775866	3.80252	0.00139027	0.207683
Fgd2	-2.98312	-2.98195	-4.3473	-4.3473	-3.0462	-4.3473	-0.0139591	-2.91984	0.44682	4.0946	0.00139664	0.207683
Itgb4	-1.09616	0.287667	2.19576	-1.09616	2.65257	-1.09616	-1.09616	-1.09616	0.267093	4.48754	0.00143311	0.210683
Trim6	-1.79778	-1.70355	-3.0687	1.2128	-0.0511546	-3.0687	-3.0687	-3.0687	0.362307	4.2432	0.00144319	0.210683
Tnfrsf25	0	0	0	1.27001	1.30404	4.21452	0	1.37136	0.262586	4.48278	0.00144321	0.210683
Kcnj15	0.624456	-1.33036	0.0692938	2.92659	3.35061	-0.204609	3.14124	-1.33036	0.683107	3.94906	0.00145499	0.211114
Gm48957	0	0	4.18334	1.11364	0	1.09618	1.22811	1.37116	0.198752	4.23242	0.00146908	0.211875
Trp73	-2.46321	-3.84161	-3.84161	1.14249	-1.75634	-2.14049	-2.18963	-2.34288	0.501432	3.93405	0.00149718	0.214635
Slc38a7	-0.266416	-1.73722	2.35242	-1.92307	0.706824	1.89748	1.61422	-1.74604	0.957937	3.76361	0.00150777	0.214866
Sirt4	1.37887	0	3.67236	5.00331	0	3.47339	1.68825	0	0.486744	4.20133	0.00154648	0.216145
Ptprb	-1.07244	2.89909	-1.48299	-2.53148	0.475809	-1.72658	1.91484	1.68557	1.41815	3.75016	0.00155069	0.216145
Lgi2	-1.42617	-2.16997	-0.690383	-2.73144	-2.38112	-4.59544	0.686143	-0.363068	1.49868	3.74814	0.00155726	0.216145
Serpina3i	-4.27136	-4.27136	-2.67287	-1.15509	-4.27136	-4.27136	-4.27136	-2.93784	0.295255	4.43047	0.0015595	0.216145
Etv4	-4.14193	-5.36411	-1.83303	-5.36411	-1.72274	-0.789968	-3.67852	-5.36411	0.73562	4.0321	0.00156189	0.216145
Fhod1	-1.71702	-3.75498	-1.61319	-3.75498	-2.43764	-3.75498	-3.75498	-3.75498	0.214069	4.41477	0.00159631	0.218774
Cyp4f40	1.25886	0.0166172	-0.616024	0.930596	3.01871	-1.95744	-0.745013	0.662361	0.51873	3.8079	0.00159916	0.218774
Fut2	-2.75069	-2.75069	-1.32611	-1.54922	1.44397	-2.75069	-2.75069	-0.602897	0.29839	4.17677	0.00161064	0.219092
Robo3	-1.10067	1.02634	3.76565	-1.10067	-1.10067	-0.000545364	2.45103	0.27107	0.376756	4.01013	0.00162471	0.219758
Rubcnl	0	0	0	0	3.86849	1.09611	0	2.04601	0.191733	4.74662	0.00165651	0.220751
Pla1a	-3.39916	-1.76043	-1.70948	-1.72953	-3.73328	-4.70563	-1.08556	-0.217379	0.678194	3.78893	0.00166124	0.220751
Rassf6	0	5.21054	0	4.53651	2.03803	0	0	1.37441	0.530495	4.38342	0.00167259	0.220751
Lama3	-4.09391	-4.09391	-2.49724	-4.09391	-4.09391	-4.09391	-4.09391	-4.09391	0.216876	5.35669	0.00168166	0.220751
Colca2	0	0	3.56512	0	0	2.6475	0.88	1.43024	0.196925	4.37651	0.00168994	0.220751
Pola2	0	4.64753	0	1.266	2.37185	0	3.56052	1.42812	0.408055	4.14527	0.00169706	0.220751
Gm31588	0	0	1.34092	1.84614	4.88105	0	5.3363	1.42642	0.538991	4.14124	0.00170847	0.220751
Alpk1	-1.21013	-1.21013	-1.21013	-1.21013	-0.262971	-1.21013	-1.21013	3.244	0.218825	4.72086	0.00171214	0.220751
Akr1b8	-2.04386	-0.678863	-2.04386	-2.04386	-2.04386	1.5596	-0.3397	-2.04386	0.192879	4.49071	0.00171504	0.220751
Atad2	-1.27663	-0.0133265	1.70763	2.87601	-1.27663	0.511102	-1.27663	-1.27663	0.270154	4.13375	0.00172986	0.221469
Ahnak2	1.30701	1.26333	1.05688	3.53222	0	1.23289	3.12979	2.01496	0.272674	3.84588	0.00177196	0.22473
Ntf3	3.65689	1.98211	2.06495	0	3.61579	0	1.89306	0	0.315276	4.11839	0.00177464	0.22473
Adgb	4.16791	0.169047	4.14519	4.10692	2.67589	1.5868	2.27698	0.160486	1.05162	3.68328	0.00178349	0.22473
Cort	3.78204	2.07283	2.98479	0	0	2.92053	0	0	0.296481	4.32809	0.00181683	0.227731
Myo3b	0	1.98165	1.35037	4.21237	0	0	0	1.43007	0.244569	4.31072	0.00186481	0.230592
Whamm	1.21692	0	2.84109	4.59135	2.72542	3.66917	3.32243	1.34015	0.527281	3.8149	0.00188043	0.230592
4930469K13Rik	-1.70704	-3.68868	-2.62422	-3.68868	0.286799	-3.68868	-1.49905	-0.640392	0.395959	3.92889	0.0018807	0.230592
Pth1r	-4.22077	-2.22818	1.03378	-1.60434	-0.53331	-1.58443	-0.380769	-4.22077	0.740398	3.81443	0.00188211	0.230592
Mpl	-1.1916	-2.57329	-2.57329	-1.37157	1.48505	1.49477	-2.57329	-2.57329	0.419567	4.08131	0.00188781	0.230592
Gm35371	-1.27689	-1.27689	0.149389	-0.163225	-0.0367399	-1.27689	2.41256	-1.27689	0.202156	4.07234	0.00191629	0.232724
Ccdc188	0.976104	0.938707	0.78097	-0.777158	-1.90057	-0.777555	3.00111	1.33106	0.545202	3.71579	0.0019247	0.232724
Adam28	0	0	0	1.11316	0	0	3.43021	1.37099	0.151742	4.62567	0.0019358	0.232889
Npr3	-0.060531	2.97122	-1.2741	-1.2741	2.32065	-0.154171	-0.382044	2.77856	0.429594	3.79516	0.00195309	0.233123
Thpo	0	0	1.05568	1.93506	0	0	3.68485	0	0.200364	4.61718	0.00195722	0.233123
Kmt5c	-1.51497	0.679559	2.16467	-1.44173	0.26371	-1.60931	0.0279706	-2.73236	0.547199	3.69933	0.00198965	0.235328
Bnc2	0.177824	0.17695	-0.150978	-1.2052	-1.2052	-1.2052	2.31847	-1.2052	0.196432	4.04816	0.00199539	0.235328
Adgrf5	0.0411847	4.43702	4.94863	2.0534	4.26002	4.8052	3.3476	0.833205	1.53627	3.62414	0.00201895	0.235876
Cep55	0	0	1.0579	0	3.51934	0	0	4.50336	0.342178	4.59297	0.00201974	0.235876
Clasrp	4.94469	0	5.10415	1.13632	4.66144	4.66969	6.37161	1.37812	1.3098	3.77433	0.00203289	0.23626
Ccdc33	2.90742	2.23102	1.76487	4.46357	0.140103	1.48224	2.03242	-0.790349	2.08712	3.60954	0.00208179	0.238079
Mutyh	-2.09903	-2.09903	-2.09903	-2.09903	-0.0430496	1.9947	-0.141469	1.30199	0.341697	4.01952	0.00209348	0.238079
Gm28729	-0.00337558	-1.21013	-1.21013	2.55461	1.04841	-1.21013	0.0176789	-1.21013	0.218043	4.01891	0.00209565	0.238079
Cd44	1.83754	1.11401	0.847869	0.561355	0.946131	0.492426	1.46205	1.79288	5.44314	3.60362	0.00210787	0.238079
Lrmp	0	4.52867	1.0799	4.30829	0	0	2.00203	5.4105	0.688404	4.01463	0.00211075	0.238079
Baiap2l2	-3.55179	1.02317	-3.55179	-3.55179	1.00004	-0.363658	-2.30427	-2.12587	0.607302	3.86354	0.00211685	0.238079
Slc4a9	1.20674	0	0	1.27035	3.69291	0	1.13321	1.51227	0.217241	4.01254	0.00211816	0.238079
Grm4	4.49507	0	4.26744	5.2452	3.71126	2.26467	2.33976	3.9408	0.849532	3.74534	0.00214957	0.239374
C130050O18Rik	0.212079	-1.09496	-0.03964	-1.09496	-1.09496	2.5651	-1.09496	-1.09496	0.180786	4.21642	0.00214967	0.239374
Prss8	-3.38916	-3.38916	-1.15438	-3.38916	-3.38916	-3.38916	-3.38916	-3.38916	0.147362	5.10734	0.00217441	0.239999
Ncapg2	3.06115	-1.10564	-1.10564	3.35901	0.930146	0.235311	-1.10564	0.232601	0.443802	3.84747	0.00217949	0.239999
4933407O12Rik	-2.85537	-0.39894	-2.85537	-2.85537	-1.40792	-2.85537	-1.97635	-2.85537	0.146577	4.23901	0.00218536	0.239999
S100a3	-2.59295	-3.86524	-3.86524	-2.74564	-2.55951	0.809164	-2.60572	-3.86524	0.420903	3.83691	0.0022217	0.242067
Fam227a	-0.570288	-1.92964	0.0295678	-2.09547	-2.00608	-3.29507	1.3937	-3.29507	0.506892	3.72759	0.00222442	0.242067
Slco1a4	3.88965	0	3.3998	6.64526	5.16138	4.79366	5.7998	4.18101	1.53221	3.72423	0.00223892	0.24212
Dok2	1.90915	0.581916	-1.95594	1.61383	-1.95594	-1.95594	-1.95594	0.141337	0.348187	3.97791	0.00224513	0.24212
Kif23	-3.21902	-1.1603	-4.58395	-2.65658	-1.8365	-3.46416	-3.69219	-4.58395	0.425872	3.71964	0.00225882	0.242443
Pcgf6	0.0391691	-1.08431	1.34164	-3.2088	-2.23392	-0.573362	2.1095	-1.86516	0.725575	3.63446	0.00226838	0.242443
Stra6l	0.607638	-1.42971	-1.42971	-1.42971	2.60283	-1.42971	1.51186	-0.0959939	0.327146	3.96537	0.00229303	0.243318
Cpsf4l	0	0	0	1.26978	0	0	4.4241	0	0.296836	5.05467	0.00229779	0.243318
Mmgt2	0	0	3.87486	2.69672	1.68772	1.2774	0.88232	4.03857	0.342168	3.81414	0.00231566	0.243318
9030025P20Rik	0.111224	-1.09559	0.254961	-1.09559	2.5777	0.000857041	0.177734	0.23745	0.224081	3.70109	0.00234122	0.243318
Gm3435	0.111224	-1.09559	0.254961	-1.09559	2.5777	0.000857041	0.177734	0.23745	0.224081	3.70109	0.00234122	0.243318
Otogl	0	0	0	0	0	1.33666	5.79397	0	0.502681	5.03616	0.00234298	0.243318
Phldb2	0.453048	0.986105	1.10297	3.90122	1.42166	2.41247	2.43091	-3.06565	1.6056	3.61478	0.00236062	0.243318
Fmo4	-3.65426	-3.65426	-2.5899	0.529913	-2.41811	-3.65426	-0.789803	-2.28215	0.39495	3.80114	0.00237112	0.243318
Jade3	-2.88355	-2.80064	-2.55014	-2.98867	-4.19037	-0.268219	-2.97168	-2.76233	0.412404	3.61173	0.00237524	0.243318
Zfp488	0.236716	-1.72576	-2.00357	-3.09143	2.72096	1.50456	0.671957	0.42419	0.905264	3.61111	0.0023782	0.243318
Egfem1	-2.33078	0.926404	-4.3448	-2.0671	-0.197206	-1.92758	-1.78562	-3.00048	0.765338	3.60605	0.00240273	0.243848
Kcns3	1.39697	3.65056	3.11882	1.11391	0	0	0	0	0.227705	4.14288	0.00240375	0.243848
Naip5	4.407	0	0	1.20147	2.44142	1.27772	1.13292	1.37078	0.303732	3.79026	0.00241858	0.244317
Mef2c	1.25041	1.09023	0.941308	0.141489	0.598672	0.555312	1.18415	1.68987	8.48183	3.52774	0.0024728	0.248745
Tbc1d10c	-3.61199	-3.61199	-3.61199	-3.61199	-1.02576	-3.61199	-1.61822	-3.61199	0.219705	4.43196	0.00249448	0.249797
Skor1	3.93016	1.39119	1.4254	1.27011	1.23979	1.0967	0	1.37133	0.250045	3.6663	0.00250413	0.249797
Cfap99	2.57415	-1.43184	-1.43184	-0.230402	-0.114905	-0.317368	-1.43184	0.080139	0.236704	3.76826	0.00251761	0.249854
Fen1	-5.15696	0.174324	-0.0414243	-0.299404	-2.21031	-0.338714	-0.32894	-0.780332	2.30258	3.51517	0.0025392	0.249854
Grhl1	3.44981	0	0	0	0	2.28013	1.13338	0	0.172381	4.41528	0.00255015	0.249854
Fmo2	-4.82313	0.872436	-0.115106	0.330665	0.771007	0.480101	-1.15712	0.163368	1.53189	3.57579	0.00255482	0.249854
Oit1	1.20602	0	3.70443	0	0	0	0	0	0.152474	4.95358	0.00255688	0.249854
Usp25	4.9596	4.47785	1.09114	4.9264	5.01234	3.13582	3.99486	2.09773	1.02285	3.56355	0.00261912	0.254451
Hcrt	0.730155	-0.158744	1.19631	3.26858	0.132559	1.39209	0.558009	0.245928	1.75436	3.49938	0.00262517	0.254451
Aldh1a1	-1.27775	-1.71523	-1.37257	-0.846696	-1.11237	-0.0234498	-0.768382	-1.58549	5.68406	3.49626	0.00264252	0.25451
Cgn	0	0	1.90291	2.92659	4.89114	5.22852	3.66135	4.22483	0.824728	3.73725	0.00266444	0.25451
Brat1	-1.51228	2.9165	2.90913	-2.23689	3.6278	2.04913	2.40488	2.21366	2.08547	3.49081	0.00267305	0.25451
Prr15l	-1.27606	2.62464	2.36486	0.0248547	1.57575	-1.27606	-0.392336	0.0957823	0.353355	3.63161	0.00267828	0.25451
Slc7a6	-4.36748	-1.33627	-0.631193	-1.88335	-1.57805	-0.757955	0.430711	-5.05353	1.93974	3.48977	0.00267894	0.25451
Plce1	0.382888	1.64506	-0.385635	-2.27756	-1.11823	0.813179	-1.77376	-2.81473	1.08156	3.48714	0.00269385	0.25488
Phf21b	-3.35137	0.526736	-0.405791	-4.06336	-0.365145	-1.60074	-3.02241	-5.26552	1.12922	3.54783	0.00270413	0.25488
A330001L22Rik	1.09629	0.0760062	2.51385	-0.471757	-0.0496677	-0.600136	2.33731	-0.809651	0.616459	3.48113	0.00272822	0.256143
Misp	3.85702	0	3.11256	1.11387	0	1.11437	0	0	0.223827	4.05355	0.00275583	0.256192
Tex52	-2.76599	-1.3821	0.582914	-0.542608	-1.81861	-2.76599	-1.06207	-2.76599	0.230747	3.82878	0.00275675	0.256192
Gm46721	3.85772	2.90515	0	0	0.947429	0	1.95434	0	0.233613	4.05146	0.00276468	0.256192
Srbd1	0.152496	1.1584	1.69505	2.72511	-0.591755	1.92414	0.515727	-2.71225	0.920743	3.53455	0.00277811	0.256192
Esrrb	1.38794	2.84867	0	0	4.07866	1.11467	0.881111	0	0.261438	3.85111	0.00278226	0.256192
Kcnn2	4.31836	0	3.4797	1.28234	4.50539	5.218	1.75346	4.75727	0.84049	3.60505	0.00281996	0.258669
Sp140	0	1.38404	1.05466	1.1131	3.10772	1.11366	0	0	0.146967	3.83979	0.00283633	0.258914
Cdc45	1.27346	2.56689	2.48788	1.20184	0.964554	3.93732	4.76908	2.50347	0.505151	3.51869	0.00286919	0.258914
Sytl5	5.403	4.44109	5.09793	3.26245	4.02512	6.60947	7.02634	3.60381	2.76594	3.45714	0.00287003	0.258914
Cytip	1.27001	2.06644	0	1.20145	2.72811	1.2782	0	3.69897	0.250781	3.69647	0.00287112	0.258914
Mettl25	1.03049	-3.69829	3.10602	1.68274	2.66248	3.05019	1.60138	1.16699	3.15977	3.45335	0.00289315	0.258914
Tgif2	-1.03096	1.47598	-1.01047	-1.15277	-0.611254	0.999138	2.53719	-2.41403	0.614378	3.51266	0.00290463	0.258914
Nenf	0.121071	1.05337	0.530221	0.689915	0.863241	1.23945	-0.177908	-0.615293	3.69496	3.45105	0.00290724	0.258914
T2	1.05488	2.85877	-1.37861	4.21916	1.53396	3.66087	3.34882	1.97044	1.07453	3.5119	0.00290914	0.258914
Itprid1	-1.74477	-2.95247	-0.81226	-2.95247	-1.63965	1.20439	-2.95247	-2.95247	0.319522	3.81785	0.0029443	0.260976
Gm36804	3.5401	2.36579	2.23994	0	3.13625	0	2.9892	0	0.314133	3.8159	0.00295411	0.260976
Cyp2r1	-2.16892	-2.16892	-2.16892	1.83078	-2.16892	-0.381281	-2.16892	-0.65712	0.249666	4.00519	0.00296887	0.261211
Rai14	2.39981	2.30065	1.25159	-1.26917	0.69337	4.00901	1.92468	4.04464	0.86477	3.49672	0.00300047	0.261211
Slc16a3	1.40101	0.600993	1.62065	0.544395	1.27329	0.981668	-0.389448	-3.15624	2.70383	3.4361	0.00300061	0.261211
Myh8	-0.938603	-2.66615	-2.35756	-2.87542	-0.381775	-4.7187	-3.80915	0.568844	0.797674	3.4946	0.00301347	0.261211
Wdr27	0	1.98171	1.43519	0	2.84548	0	3.62628	0	0.253604	3.99405	0.00302034	0.261211
Gm7690	-2.16903	-2.16903	-1.11258	0.517541	-0.789496	-0.936037	1.29129	-2.16903	0.245706	3.66743	0.00302834	0.261211
Gm8330	-2.93676	-3.90502	-4.69421	-3.10016	-2.18885	-3.17283	-1.88724	-3.48091	0.904423	3.431	0.00303315	0.261211
Fam189a2	4.74329	1.38224	3.59808	0	2.76274	2.40381	3.13534	1.37355	0.504311	3.56069	0.00307404	0.262061
Art3	-0.772045	1.91213	-0.661022	2.68187	2.11104	-0.917381	3.73365	3.73646	1.19479	3.42424	0.0030768	0.262061
Gal3st1	0.109663	0.24889	-1.48897	-4.14841	-4.01716	-1.74963	-0.269739	-3.93409	1.21592	3.42358	0.00308111	0.262061
Rnasel	2.02242	2.10621	4.23819	5.26597	3.10467	1.12483	2.99545	2.2058	0.648813	3.48117	0.00309705	0.262061
Top2a	1.74938	-0.653346	-0.7398	2.34564	0.0174489	-2.08257	0.297495	-0.45222	0.472533	3.48106	0.00309775	0.262061
2610307P16Rik	0.404674	-1.65812	-1.65812	-0.544485	1.92302	-0.543973	-1.65812	-1.65812	0.198382	3.78524	0.00311278	0.262405
Iqch	3.84375	1.43601	0	0	0.94767	1.84215	2.61974	0	0.2471	3.78306	0.00312441	0.262462
Kif24	-1.93345	2.05492	-0.595581	1.96906	0.54861	3.48453	-1.93345	-1.93345	0.669138	3.64479	0.00315709	0.263224
Clspn	1.38893	1.26221	3.71015	1.11337	0	0	1.13338	0	0.171943	3.77551	0.00316499	0.263224
Gm5306	2.63162	1.88222	2.70929	2.56325	0	1.36714	0	3.54706	0.285701	3.64101	0.00317915	0.263224
Slc44a5	-2.0478	4.06662	-2.0478	1.85572	-2.0478	2.84235	2.8102	-2.0478	1.03024	3.77209	0.00318356	0.263224
Rps6kb2	3.70771	4.69672	1.38806	5.1168	2.80756	1.70377	5.86912	3.64514	0.971031	3.46691	0.00318846	0.263224
Col13a1	-1.27503	0.715712	2.84991	0.656124	1.84817	-1.27503	1.77212	0.0969486	0.388035	3.5365	0.00322237	0.265109
Prdm8	1.04475	-2.13771	-0.513516	-0.935814	-2.13771	2.60846	2.5764	-0.641383	0.571661	3.52889	0.00327056	0.266454
Stxbp2	-0.501823	3.75335	3.79495	-0.579366	2.92446	2.47577	2.57885	-1.77962	1.1045	3.4528	0.00328155	0.266454
Odf3l1	-1.21288	-1.21288	-1.21288	2.79065	1.25766	1.65624	-1.21288	3.42827	0.467827	3.75365	0.00328559	0.266454
C130074G19Rik	1.27405	3.3516	2.47509	4.14198	3.70615	2.40508	2.68917	3.93638	0.572957	3.451	0.00329367	0.266454
Rxfp1	-1.53584	-4.34772	-0.654873	-4.34772	-2.52656	-0.462543	-2.62148	-4.34772	0.49089	3.62168	0.00329436	0.266454
Wnt6	0	0	2.65204	4.09963	3.5649	4.13562	4.51194	4.13561	0.719289	3.61745	0.00332014	0.267635
Rttn	0	1.42639	4.7287	3.81949	0.969011	4.05915	4.16675	1.37493	0.617565	3.51708	0.00334681	0.268879
Fhl4	1.1835	-1.27713	-1.27713	-1.27713	-1.27713	-1.27713	-1.27713	1.84042	0.14779	4.20549	0.00337694	0.270392
Vav3	1.97557	2.30918	5.34673	1.71152	0	2.62073	3.54778	0	0.479199	3.59468	0.00346266	0.276332
Tonsl	2.80367	0	0	1.77039	3.76707	1.70294	2.44125	0	0.279396	3.71874	0.00348834	0.277457
Il1rn	-1.56511	-1.50827	0.815138	0.230491	0.102793	1.95869	-2.78183	-1.40815	0.519626	3.41703	0.00353032	0.279866
Ccbe1	1.86536	0	0	1.20141	0	0	0.879554	3.6854	0.173257	3.88535	0.00357545	0.280226
Per3	4.34048	-2.03491	3.65616	1.45166	3.54311	2.80401	1.87744	-0.655645	1.45426	3.40931	0.00358651	0.280226
Piezo2	-4.99735	-2.96793	0.12575	-4.99735	-0.822657	-2.53646	-1.81977	-4.99735	0.767569	3.57454	0.00359393	0.280226
Sstr5	2.34751	1.95055	0.88928	0.803293	-0.461728	-1.76159	-0.376266	1.533	0.464588	3.4048	0.00361969	0.280226
Pparg	0	1.3903	3.48756	4.23857	3.32087	0	0	0	0.37661	3.87555	0.00363052	0.280226
Prdm9	-1.27331	0.11569	0.145184	-1.27331	1.90476	3.07755	2.66671	-1.27331	0.477412	3.56809	0.00363701	0.280226
Tmigd1	4.61356	2.51391	1.33449	4.30457	0	4.29076	5.12037	0	0.794304	3.5673	0.00364231	0.280226
Rskr	-3.90019	-3.83442	-2.66629	-3.99933	-2.45514	-0.457577	-1.12244	-3.12764	0.789104	3.34263	0.00365753	0.280226
Exo1	-1.02999	-1.05947	1.85001	-2.42458	-0.365267	-1.14814	0.501443	-1.05269	0.354988	3.39929	0.00366077	0.280226
Egr2	1.20271	-3.53196	-0.31028	-1.75313	-0.842438	-0.370669	-0.417266	-2.1571	0.603716	3.39653	0.00368148	0.280226
Esrp1	2.72995	-1.87041	-1.87041	-1.87041	-0.631097	-1.87041	0.92682	-0.536754	0.318197	3.68733	0.00368187	0.280226
Catspere2	-1.74888	-1.74888	-1.74888	-0.548293	1.47575	-1.74888	-1.74888	-0.378717	0.16336	3.86563	0.0036872	0.280226
Nos3	1.38822	0	2.13242	3.67215	0	1.11446	1.22755	2.13857	0.234782	3.55905	0.00369837	0.280226
Rnf135	2.78007	0.15484	-1.21018	-1.21018	-1.21018	0.463332	0.896221	-1.21018	0.232287	3.68325	0.00370786	0.280226
Oxtr	-0.709729	-1.91915	-1.90072	-0.164297	1.50705	1.09481	-3.30059	0.138621	0.679585	3.3926	0.00371115	0.280226
Tbl2	-1.71831	-3.02468	0.998979	0.49458	0.642686	1.54585	1.30412	-0.478892	0.749498	3.39116	0.00372214	0.280226
Zfp169	-2.4862	-1.5649	-2.63636	-2.39166	-3.69385	-3.69385	-0.286589	-3.69385	0.313239	3.55269	0.00374214	0.280848
Acer2	-1.90086	0.170835	-1.90086	1.43345	2.62886	1.82238	2.4351	2.04718	0.698961	3.45642	0.00376819	0.281919
Gm5134	1.24788	-1.80655	-1.80655	-1.80655	-1.80655	-1.80655	-1.80655	0.84696	0.161682	4.11791	0.00380385	0.283255
Zfp142	2.99498	2.5135	-1.83042	3.36878	4.08801	3.85336	4.62535	3.41567	1.73958	3.37665	0.00383438	0.283255
Pank1	-4.35736	-2.38225	-0.890845	-4.35736	-1.99727	-0.734633	-0.0596414	-2.98268	0.569595	3.44551	0.00384953	0.283255
Catsperd	-1.34938	0.0420008	-0.294117	-1.34938	1.95472	-0.235424	-0.46974	-1.34938	0.177833	3.53564	0.00386225	0.283255
Prph	2.55123	1.73971	3.607	3.57735	1.72585	1.7324	4.18342	-1.12068	0.884519	3.37261	0.00386622	0.283255
Rhbdf1	1.36749	0	0	3.0369	0	5.07189	1.26586	1.50721	0.372692	3.65883	0.00386722	0.283255
Zfp661	2.85146	-2.29597	1.69538	-1.15516	4.46393	2.69723	3.03625	4.02393	1.67407	3.37179	0.00387268	0.283255
Gm52456	-1.34988	-1.34988	1.9958	-1.34988	-1.34988	-1.34988	-0.470888	0.66457	0.145065	4.35041	0.00388619	0.283255
Cd72	-2.47896	-2.45753	-3.84858	-0.279915	-3.84858	-2.61584	-3.84858	-3.84858	0.313565	3.64954	0.00392971	0.283255
Kif17	-3.31874	0.756936	-0.314216	0.597887	0.966511	1.31936	0.0808747	-1.16174	0.792565	3.36453	0.00393076	0.283255
Edar	-3.82965	-3.82965	-1.99667	-2.6282	-3.82965	-2.02754	-1.09099	-3.82965	0.250703	3.64775	0.00394187	0.283255
Zfp853	-0.300216	-2.16726	-0.733536	2.26782	-0.854703	-2.16726	0.398077	-0.737485	0.337388	3.43161	0.00395582	0.283255
Mgam	-4.27323	-4.27323	-4.27323	-4.27323	-3.3267	-4.27323	-4.27323	-4.27323	0.219324	4.55195	0.00395725	0.283255
Kifc1	0	0	3.37777	0	0	1.09551	1.7682	0	0.13912	4.08645	0.00397103	0.283255
Pinlyp	1.63518	-1.09414	-1.09414	-1.09414	1.327	-1.09414	-1.09414	-1.09414	0.129659	4.08437	0.00398237	0.283255
Thumpd2	1.86979	0.317166	-2.36328	0.562659	0.8936	2.16722	-2.36328	3.13432	0.841812	3.42734	0.00398912	0.283255
Ptpru	1.22376	3.03143	-1.21535	1.35712	2.03768	0.881131	4.06435	2.34761	0.788179	3.35641	0.00399665	0.283255
Slco4a1	1.257	1.67624	-3.09488	-3.09488	-1.8084	-0.141744	-0.566154	-3.09488	0.569185	3.5164	0.00400252	0.283255
Hps5	1.38243	0.747809	2.75082	-1.79229	2.44448	2.26625	3.30548	1.12108	2.35672	3.2992	0.00401084	0.283255
Scyl3	4.3218	1.68411	3.24936	4.20362	2.65895	3.38164	3.67823	2.03908	2.67712	3.29771	0.00402354	0.283316
Kiss1	-0.185106	0.843383	0.508113	-0.951871	0.405227	-4.45213	-0.263591	-3.67977	1.98741	3.29607	0.00403756	0.28347
Gm33858	-1.20994	-1.20994	-1.20994	-0.00853607	1.61629	-1.20994	1.62032	-1.20994	0.16816	3.80504	0.00405435	0.283816
Acnat1	-4.96293	-4.96293	-3.55969	-3.76318	-3.66772	-0.937689	-0.221426	-2.93797	0.624735	3.41636	0.00407591	0.284123
P3h3	1.45148	-0.88091	-1.54231	1.20559	2.1836	0.251415	-1.972	-1.50325	0.724126	3.29087	0.00408246	0.284123
Arhgap42	2.37144	-1.38656	0.722696	1.37687	1.53379	2.22194	4.25475	3.20586	0.864544	3.34332	0.00410535	0.284197
Zfp951	-0.475925	-0.3645	0.811496	-2.69736	0.241734	1.49674	2.27573	-4.6478	1.76427	3.34196	0.00411681	0.284197
Dkk4	-0.00081651	1.77381	-1.27366	2.51473	1.2405	0.438803	2.96884	0.153692	0.454699	3.34169	0.00411914	0.284197
Gm30515	-0.918358	-2.89111	2.51076	-0.604993	1.55156	2.10275	2.09444	-0.738584	1.02275	3.33909	0.00414111	0.284892
Tiam2	-0.30209	-4.90975	-1.05638	-0.655478	-1.37182	-6.2025	-3.0468	-2.66633	1.50888	3.33606	0.00416691	0.285845
Fshb	-3.37647	-1.28061	-1.15544	-2.10591	-3.37647	-3.37647	-2.49658	-3.37647	0.19129	3.61336	0.00418334	0.286152
Tmem269	-1.21011	-1.21011	-0.154202	-0.011179	0.784828	-0.0958329	2.27102	0.160386	0.213318	3.39728	0.00423152	0.288623
Csgalnact1	-1.55954	-1.04879	-1.73186	-0.61129	-0.222812	-3.77813	-0.636788	-5.2604	2.5598	3.26674	0.0042974	0.291034
LOC118567787	-1.8068	1.9589	-1.8068	-1.8068	-0.488979	-1.8068	-1.8068	-0.43567	0.189317	3.76733	0.00430213	0.291034
Fermt1	-3.55172	-3.55172	-3.55172	-3.55172	-3.55172	-3.55172	-1.60552	-1.53694	0.179872	4.02443	0.00432429	0.291034
Vash2	1.67906	-1.19612	1.71617	0.776851	0.492286	-1.46195	-2.5847	-1.24448	0.531649	3.31758	0.004328	0.291034
Krt6a	-3.06181	-1.69682	-3.06181	-3.06181	-1.61333	-3.06181	-0.361088	-3.06181	0.179898	3.76343	0.00432872	0.291034
Ccdc169	4.70951	1.43568	0	0	0	0	0	0	0.290374	4.46941	0.0043398	0.291034
Rasgrp3	0	2.06633	4.45723	2.87458	4.08977	4.07099	2.20205	1.37476	0.584771	3.38105	0.00436862	0.292149
Gm14326	0	0	1.05373	0	2.83884	0	0.878085	0	0.102864	4.01362	0.00438923	0.292709
Cchcr1	1.22838	4.68593	5.62541	0	3.23672	4.21846	5.95598	2.09772	1.09811	3.3736	0.00443302	0.294054
Tedc2	-3.51626	-2.08047	-1.10214	-3.51626	-0.403776	-2.40147	-3.51626	-2.18286	0.276341	3.46132	0.00443396	0.294054
Trim12a	-0.381661	-2.2943	2.56731	2.20859	-1.07131	0.600125	3.16887	2.63818	0.98444	3.30245	0.00446451	0.295262
Hs3st3b1	3.42285	1.43587	1.59782	1.7724	3.05581	0	0	2.04702	0.265169	3.45499	0.00448655	0.29535
Fam117a	-1.89934	-1.89934	-1.89934	0.765623	-0.595284	1.4838	0.759728	-1.89934	0.26138	3.57248	0.00449052	0.29535
1700010I14Rik	-2.70591	-2.53118	-0.489304	-3.91474	-3.91474	-2.79871	-3.91474	-0.411236	0.354635	3.44772	0.0045477	0.296881
Trpm6	-3.21752	-4.49044	-1.89838	-2.64853	-4.49044	-4.49044	-0.594989	-2.49806	0.460281	3.44771	0.00454782	0.296881
Prdm13	3.61699	0	0	0	0	1.09583	1.27467	0	0.166354	3.98743	0.00455099	0.296881
Crybg2	1.58298	2.86736	0.127202	-1.21357	0.0844412	-1.21357	2.38084	3.53842	0.545556	3.35842	0.00456738	0.29714
Gen1	-4.92279	-4.92279	-2.08117	-2.99196	-2.18907	-4.92279	-4.92279	-3.5515	0.35831	3.55816	0.00460361	0.29838
Foxa1	1.20694	1.36502	0	4.00861	1.30444	0	1.28609	1.33313	0.23668	3.44027	0.00461136	0.29838
Gdf9	-1.85598	0.296309	0.689736	-3.06381	-2.11471	-0.684052	-3.06381	-3.06381	0.335302	3.43628	0.00464575	0.299795
Esrrg	-3.67016	-4.71443	-2.69203	-3.29532	-1.80123	-4.82794	-2.9826	-2.10576	2.50113	3.22149	0.00473183	0.303907
Cav3	0.770214	1.46737	-0.0393473	0.206396	-1.09623	-1.09623	2.18153	2.05795	0.272262	3.33958	0.00473995	0.303907
Lsm14b	4.23257	5.12022	2.00343	2.30024	2.10333	3.15393	2.00304	3.98961	0.697883	3.27254	0.00474756	0.303907
Fbxo30	-1.83903	0.439568	-1.31914	-0.112241	0.521866	1.24558	2.34886	-1.83834	0.86129	3.21696	0.00477761	0.305016
Kynu	3.13939	0	0	0	2.26253	1.23306	0	3.4165	0.23055	3.69813	0.00479947	0.305596
Jaml	-1.27696	-1.27696	-1.27696	-1.27696	2.46867	-1.27696	-1.27696	-1.27696	0.185927	4.37434	0.0048318	0.306838
Ripor3	-1.43221	-1.43221	-1.43221	-1.43221	-1.43221	-1.43221	3.42031	-0.061504	0.278702	3.93851	0.00487058	0.307865
Smim43	-2.88462	-2.88462	0.692086	0.568897	1.92954	0.801113	-0.0842974	-0.404312	0.627371	3.32412	0.0048866	0.307865
Tfap2a	0	0	0	3.86127	0	0	0.879534	0	0.172214	4.36338	0.00489234	0.307865
1110018N20Rik	3.61498	1.26282	2.23736	1.69975	0	1.36852	0	1.33304	0.223831	3.4078	0.0048994	0.307865
Gm5820	2.27018	-1.09655	0.736706	1.36163	2.23412	-1.09655	1.12642	-1.09655	0.298994	3.40603	0.00491562	0.308075
Pde3b	-2.07348	-0.445178	-1.71702	-4.56286	0.109678	-0.659631	0.348463	-2.12131	0.937177	3.25155	0.00495702	0.309859
P2rx2	1.05416	1.28975	1.2395	2.20766	0.851772	0.640233	-1.40438	3.54658	0.560906	3.24931	0.0049799	0.310041
Haus8	1.27972	4.36343	5.63105	5.74973	2.97879	4.3501	5.90183	5.68758	1.48046	3.24874	0.00498582	0.310041
Dennd1b	-6.68191	-3.71647	-1.65903	-2.45166	-2.12209	-1.84927	-3.75462	-3.57276	1.30999	3.24523	0.00502194	0.310503
Cdkal1	-1.0344	-4.66474	-0.235421	-0.67998	-1.21894	-1.58987	-0.404698	-1.53395	2.14941	3.19287	0.00502929	0.310503
Usp40	-2.03763	-1.71445	-4.71313	-2.82129	-1.81463	-2.80301	-0.0698739	-4.80723	2.64954	3.19166	0.00504224	0.310503
Ttn	-3.34459	-4.64177	-7.26178	-3.23002	-0.727804	-5.18544	-2.31405	-3.01424	3.31514	3.18932	0.0050675	0.310503
Gm46122	1.89753	1.38387	1.59719	3.26794	1.30442	0	2.9696	0	0.238166	3.60499	0.0050676	0.310503
Gm5706	-5.02742	-3.59793	-3.60795	-2.80041	-2.56596	-3.34161	-2.06999	-3.65428	0.463718	3.2405	0.00507108	0.310503
Col24a1	1.95286	3.12104	0	0	0.946689	0	2.84397	0	0.194318	3.66177	0.0050848	0.310523
Gm27162	-3.12248	-5.17954	-2.27728	-3.97784	-5.17954	-3.90713	-2.53057	-3.80639	0.416225	3.30111	0.00511342	0.310523
Kcnj8	1.27064	2.29607	3.74418	1.19908	2.78029	3.50909	1.70428	0	0.353569	3.30096	0.00511489	0.310523
Tlr5	3.60286	1.43588	0	0	0	0	3.46745	0	0.264554	3.9022	0.00512329	0.310523
Pyroxd2	-3.31082	-3.31082	-3.31082	-2.11182	-0.839724	-2.21367	0.272754	-3.31082	0.29934	3.4921	0.00516519	0.31139
Inhba	4.30536	3.9383	3.27483	2.78658	3.49071	2.33467	3.16025	4.26399	2.06935	3.17979	0.00517153	0.31139
Htr1d	0	0	0	0	0	0	0.87903	3.86345	0.146877	4.31387	0.0051766	0.31139
Espn	-1.39726	0.12932	3.03034	2.53162	-1.39726	3.4506	2.40756	-0.0222697	0.691779	3.29328	0.00519301	0.311594
Ubap1l	-1.21014	0.0526632	2.19451	-1.21014	1.23838	-1.21014	1.6387	-1.21014	0.223079	3.4856	0.0052241	0.312675
Pkmyt1	2.10071	1.8781	-1.87062	0.0312635	-0.91143	1.28488	0.094414	-1.87062	0.425817	3.28789	0.00524858	0.312816
Tspan8	-4.80548	-1.6773	-3.40046	-4.80548	-1.37977	-0.71078	-3.59504	-3.43141	0.572899	3.2875	0.00525258	0.312816
Nfkbid	1.38811	3.18761	0	0	0.94763	0	3.58165	0	0.244878	3.63453	0.00531024	0.313119
Dok3	1.91793	2.92157	1.05601	1.27034	0.94716	3.15406	0	0	0.218939	3.36455	0.00531215	0.313119
Cited4	2.2021	1.12929	0.696511	1.14475	1.60108	1.18213	2.75552	2.5708	0.990045	3.16684	0.00531632	0.313119
Lin28b	1.10736	-2.94286	1.23121	-2.38619	1.74328	-3.01252	-1.07586	1.66764	1.39688	3.16641	0.00532115	0.313119
Tyk2	0.70014	0.779142	-3.46362	-1.32977	-3.46362	-0.101172	1.86108	2.20016	1.06583	3.27984	0.00533273	0.313119
Sec14l3	-2.17445	-2.85269	-1.15918	0.241437	-0.666818	-3.00411	-1.35644	-2.1034	0.581571	3.16481	0.00533944	0.313119
Abca17	-2.52344	-3.91941	-3.91941	-2.71794	-2.97056	-2.64182	-0.290664	-3.91941	0.318835	3.35929	0.00536473	0.313119
Ccna1	-2.99514	-2.99514	-0.573094	-1.79332	0.958739	0.159581	1.14213	-2.99514	0.489851	3.35853	0.0053724	0.313119
Gucy1b2	-1.09621	0.339616	4.08999	0.173744	1.72914	-1.09621	-1.09621	0.333768	0.271041	3.35823	0.00537538	0.313119
Fam76b	0.0514584	-1.32261	2.59095	3.69207	1.48461	3.58405	1.27311	4.22764	0.966529	3.20993	0.0054007	0.313256
Sh2d4b	-1.2103	0.0521935	-1.2103	2.27241	-1.2103	2.48343	-0.329678	-1.2103	0.268747	3.46625	0.00540391	0.313256
Helt	-3.64917	-2.26517	-2.59415	-2.53587	-3.64917	-3.64917	-3.64917	-3.64917	0.165276	3.61192	0.0055054	0.318369
Gm6838	2.93221	2.56366	0	1.11398	0.947454	2.17653	0	2.88803	0.235002	3.59279	0.0055303	0.318476
Kcnk4	4.82266	2.81509	3.44215	4.18248	2.73666	0.464527	1.8629	1.98552	1.16986	3.14717	0.00554413	0.318476
Grrp1	3.90433	2.02804	0	0	2.90911	1.11771	3.65002	0	0.381382	3.451	0.00555011	0.318476
Gm51252	2.6369	3.32946	3.33202	2.66656	1.45228	0	0.882123	2.58019	0.328178	3.5969	0.00559037	0.318476
Primpol	0.0237549	0.209741	-1.34296	-0.0759922	-1.34296	2.94062	1.85658	0.72377	0.386505	3.25566	0.0055937	0.318476
Zgrf1	3.66145	3.6514	1.43496	0	0	0	0	0	0.265444	3.83748	0.00560936	0.318476
Rhebl1	0	0	1.96405	2.33676	3.98831	2.81853	2.16415	1.51091	0.317252	3.33539	0.00561057	0.318476
Insc	1.92801	-1.21031	0.139826	-1.21031	0.240668	-1.21031	2.64949	0.123063	0.272587	3.33436	0.00562141	0.318476
Cenpk	-3.57723	-4.7847	-4.7847	-3.51489	-4.7847	-1.88006	-4.7847	-4.7847	0.292578	3.59825	0.00562697	0.318476
Xlr4a	-1.92877	-0.600299	-1.73974	-0.137354	-0.532341	-4.54957	-0.202177	-4.26527	1.4433	3.13899	0.00564182	0.318563
Fanci	0.0950899	-1.21177	-1.21177	0.719084	0.154952	3.03389	1.72849	1.89584	0.393774	3.24928	0.00566474	0.319105
Rtp4	-0.332364	-2.85452	-1.43935	-1.73541	1.71978	-1.62387	-0.497767	-1.5174	0.410148	3.18013	0.005743	0.322754
Slc28a2	-4.43692	0.687245	-0.0847192	-4.43692	-0.387124	-3.11417	-1.60977	-4.43692	0.768959	3.32152	0.00575848	0.322866
Cd209c	3.24672	0	2.64359	0	0.946195	1.23332	0	0	0.169753	3.57923	0.00580098	0.324489
Arhgef19	-0.0695784	-1.27669	-1.27669	0.0261336	-0.328895	0.510968	0.629556	2.83038	0.254259	3.23556	0.00582059	0.324827
Tldc2	-4.17152	-2.7904	-3.0892	-0.154445	0.931083	-4.17152	0.251463	-2.79613	0.739376	3.23043	0.00588	0.326863
Stac	-0.373342	-0.164713	2.33817	-1.09621	-0.190264	0.785871	0.0207123	-2.29564	0.431912	3.16793	0.00588946	0.326863
Stra6	-3.02292	-1.35044	-5.52818	-1.51138	-1.20707	-5.52818	0.676607	-1.40526	1.29222	3.2272	0.00591769	0.326863
Gm12592	1.38826	3.4381	2.41327	2.16128	0	1.23306	1.87194	0	0.230508	3.47549	0.00593313	0.326863
Dcaf17	-1.89245	3.35191	2.62211	1.69521	1.47283	1.09856	0.689251	3.25318	1.67717	3.11451	0.00594454	0.326863
4933430I17Rik	0	0	0	4.00922	3.71123	4.72414	5.82248	4.59764	0.973766	3.41139	0.00594942	0.326863
Crocc2	-1.21045	0.225027	-1.21045	-0.00897347	2.48608	2.2351	-0.0775748	0.123214	0.31888	3.22423	0.00595264	0.326863
Pdzd7	0	1.4361	0	0	0	4.22221	0	0	0.236236	4.18787	0.00598557	0.327437
Zfp697	1.39743	0	1.05551	0	2.72328	1.23323	0.879891	3.11816	0.191042	3.3005	0.00599044	0.327437
Gm31365	-1.21012	2.43757	-1.21012	1.90583	-0.263001	-1.21012	-1.21012	-1.21012	0.216879	3.55645	0.00601681	0.328129
2810433D01Rik	1.97735	1.88641	2.11644	1.89042	2.17121	1.74336	4.13377	2.56132	9.32458	3.1073	0.00603681	0.328471
Cd36	3.33182	-0.00985405	2.87879	3.85329	4.07502	-0.0577138	4.27988	-1.37558	1.18157	3.15246	0.00608059	0.328678
Prrxl1	0	0	0	0	3.37635	1.09554	0	0	0.141726	4.17307	0.00608934	0.328678
H3c14	-3.31353	-1.92225	-3.31353	-1.54147	-3.31353	-2.08042	-1.61521	-0.843836	0.217311	3.2904	0.0061053	0.328678
Ctc1	0	3.66865	3.41187	1.92843	4.19487	1.93662	0.893762	2.16399	0.452631	3.21121	0.00610817	0.328678
Wtip	-1.21978	-2.61657	-2.61657	1.00735	-1.16635	-1.38357	-0.744404	-2.61657	0.242791	3.28928	0.00611819	0.328678
Mmp28	-1.09532	-1.09532	-1.09532	2.47114	1.54146	0.0188848	-1.09532	0.275862	0.205119	3.39321	0.00614265	0.328678
Mgl2	-3.41792	-3.41792	-3.41792	0.611215	-2.17842	-3.41792	-3.41792	-3.41792	0.290503	3.77132	0.00615778	0.328678
Tgfbr3l	-3.13333	-4.4403	-4.4403	-4.4403	-1.70366	-2.59824	-2.09821	-2.78389	0.352507	3.28558	0.00616085	0.328678
Inpp5d	0.972084	3.39578	-0.178491	1.05302	1.61783	2.14722	0.0529525	-3.59707	1.61209	3.14585	0.00616417	0.328678
Cd19	1.3887	1.56586	0	0	1.38107	0	0	3.83645	0.191931	3.53769	0.00620083	0.329558
Gm39090	0	0	0	1.20144	3.25002	0	3.83757	0	0.244368	3.76556	0.0062082	0.329558
Gm9899	-1.92112	-1.96453	-3.22812	-1.92578	-0.238349	-3.22812	-1.95632	0.204934	0.298575	3.20143	0.00622774	0.329863
Gm15521	2.88374	1.34858	-1.10952	0.736601	2.94369	0.606085	3.1114	0.230709	0.532196	3.13747	0.0062718	0.33033
Zdhhc15	-2.08155	-0.716126	-2.08155	-0.959095	1.81059	1.28097	-0.109486	2.59409	0.503941	3.19762	0.00627487	0.33033
Gm29975	0	0	1.0537	0	0	3.75615	0	0	0.168565	4.14689	0.00627793	0.33033
Sec14l5	1.5069	-2.16124	0.0863343	-2.16124	-2.16124	1.93026	-0.791466	-2.16124	0.37097	3.37609	0.00633053	0.331812
Slc43a3	-2.51233	-4.61744	-1.60331	-2.31773	-0.69344	-0.0580843	0.645646	-4.61744	0.885802	3.19291	0.00633382	0.331812
Gata3	-1.9565	-0.568226	-1.9565	2.81166	1.04561	2.35136	1.42526	-0.46053	0.584581	3.19108	0.00635683	0.331993
Arhgap45	0.764867	-2.11105	-3.47611	-3.47611	-2.16328	-3.47611	-3.47611	-3.47611	0.318789	3.52145	0.006365	0.331993
Fiz1	-1.04636	0.782318	0.542865	-3.08534	1.13716	1.75167	2.07774	-1.70831	0.927399	3.12522	0.00643259	0.334461
Rnf183	0	4.01893	0	0	0	1.11387	0.879461	0	0.168449	3.73958	0.00644112	0.334461
Myof	1.09094	1.71615	1.02833	-3.97321	0.833211	-2.66404	-1.29591	0.567272	1.21307	3.1236	0.00645423	0.334461
Lrrc2	0.17385	-1.09624	-1.09624	0.899486	1.63251	-1.09624	2.08404	2.03783	0.273789	3.25767	0.00649329	0.335174
LOC118567768	-0.537533	-0.424046	-0.750171	-0.505695	0.113593	1.17235	2.14833	-1.80779	0.322238	3.12048	0.006496	0.335174
Gm25848	1.25937	-2.37137	-1.30782	0.248447	-0.311629	0.847225	0.699122	-2.37137	0.387245	3.17845	0.00651805	0.335441
Zfyve1	0.35306	-0.207984	-0.819364	-0.103271	0.490631	-0.470362	-0.00981746	-3.44513	3.99323	3.0701	0.00653649	0.335441
Plk4	3.75849	1.85694	1.34282	0.659374	0.724841	1.06563	1.07983	-1.76967	0.694759	3.11697	0.00654322	0.335441
Endou	3.0435	-1.34783	0.550528	-1.34783	-0.399334	-0.250708	1.44927	-1.34783	0.296415	3.25222	0.00656034	0.335584
2600014E21Rik	-3.30598	-3.30598	-3.30598	-3.30598	-3.30598	-2.20969	-3.30598	-1.8746	0.14287	3.72444	0.0065811	0.335584
Zfp944	-1.38538	2.71935	-1.38538	4.13952	2.87833	2.26107	3.05043	0.0379013	0.922184	3.17141	0.00660982	0.335584
Pheta2	0	0	1.05487	0	3.13982	1.80171	1.2749	0	0.15707	3.49622	0.00662917	0.335584
Tmem232	-5.34731	-1.96928	-5.34731	-2.46124	-3.05376	-5.34731	-3.15605	-5.34731	0.471393	3.34845	0.00664657	0.335584
Tpx2	-3.34272	1.85382	0.0845641	-3.34272	-3.34272	0.715387	-0.660814	0.658198	0.749976	3.24471	0.00665381	0.335584
Gm6773	-4.14621	-5.52276	-3.91413	-3.24008	-2.97588	-3.83234	-2.58625	-3.46996	0.574738	3.10823	0.00666266	0.335584
Ttc38	-0.792698	-3.31742	-2.58257	0.15805	0.210228	-1.24596	-1.48051	-0.432638	0.941523	3.06033	0.00667441	0.335584
Kcnrg	1.24259	-1.84215	-1.84215	-1.84215	-1.84215	0.628138	-1.84215	-1.84215	0.166237	3.71345	0.00668477	0.335584
Dcdc5	0.59896	-0.162354	-0.367165	2.22409	2.15496	-1.42767	1.50778	-1.42767	0.367388	3.16562	0.00668618	0.335584
Zcwpw1	-3.84855	-2.48349	-2.79107	-3.84855	-2.8998	-1.48455	-0.9019	-2.4187	0.312387	3.16442	0.00670212	0.335681
LOC118567558	1.63045	0.610649	1.87563	0.445275	2.56441	1.66999	3.95056	3.13772	0.822398	3.05367	0.00677025	0.336969
Tcp11	-2.59047	1.84327	-2.59047	-0.691384	0.069377	2.25632	0.792125	-0.565413	0.632267	3.15836	0.00678332	0.336969
Cep131	0.238473	-1.48447	1.24025	1.08283	0.931053	-0.336347	2.32151	-1.5306	0.81848	3.05157	0.00680069	0.336969
4933424G06Rik	1.39794	0	0	2.2767	0	0	3.08729	0	0.153504	3.70133	0.00680113	0.336969
Hcrtr1	-1.09545	-1.09545	-1.09545	0.207845	1.4949	-1.09545	-1.09545	2.80939	0.214442	3.47935	0.00681225	0.336969
Fzd6	-4.58004	-3.21436	0.501903	-1.89531	-0.104321	-0.253397	-4.58004	0.302296	0.965131	3.15583	0.0068175	0.336969
Ncf1	1.02061	-2.71778	-1.6604	-0.440839	-2.71778	-2.71778	-0.505369	-0.222023	0.305439	3.23053	0.00683427	0.336969
Cyb5rl	-5.46786	-0.877048	-3.56565	-0.4042	-2.23893	-5.46786	-1.00178	-3.41095	0.98244	3.15306	0.00685509	0.336969
Gls2	4.16372	3.1723	4.33187	1.25968	2.88594	4.8215	1.12738	2.60184	0.684741	3.09352	0.00686854	0.336969
Gm5936	-3.21729	-3.21729	-1.78107	-3.21729	-3.21729	-1.54427	-0.409834	-3.21729	0.201467	3.47298	0.00688275	0.336969
Plekhg2	0	4.89794	2.66596	5.21692	1.95599	3.56847	5.29404	3.98514	1.017	3.14972	0.00690072	0.336969
Dnah7c	0	3.42102	3.92615	3.11136	3.37028	1.10363	3.03038	0	0.4419	3.225	0.00690598	0.336969
Cst3	0.416739	0.285037	0.0322139	-0.160998	-0.0482513	-0.0439121	0.423542	0.556908	9.03565	3.04378	0.00691497	0.336969
Slc5a7	1.46858	-1.34547	0.0758357	-1.34547	1.67144	-1.34547	2.97739	0.671722	0.360324	3.22355	0.00692488	0.336969
Pde7a	3.09141	4.06317	-1.11322	0.14724	1.31949	3.42766	-1.11322	0.911931	0.653657	3.14503	0.00696524	0.338245
Dach2	3.4632	0	1.64717	1.29751	1.80726	0	4.60806	1.42845	0.392532	3.21722	0.00700817	0.338473
Elf3	1.39652	0	3.02362	0	3.55732	2.38036	1.95539	0	0.266541	3.31808	0.00701273	0.338473
Ccdc125	0.385016	-3.19445	-1.8443	-3.19445	-3.19445	-1.96155	-2.31318	-1.05607	0.270893	3.21604	0.00702378	0.338473
Tmem253	1.30701	1.38383	2.6687	0	3.01122	1.70274	3.11712	0	0.262875	3.21565	0.00702897	0.338473
Kdf1	-1.61957	-1.6319	-3.01567	-3.01567	-3.01567	-1.64895	1.28295	-3.01567	0.306035	3.31584	0.00704063	0.338473
Lemd1	-3.04661	-1.66265	-1.11762	-3.04661	-2.09999	-0.427138	-3.04661	-3.04661	0.190799	3.3137	0.00706728	0.339073
Cep78	0.138601	3.33186	3.8072	3.62275	2.74052	1.21467	2.96199	2.13664	0.938048	3.03123	0.00710322	0.340116
Xkrx	-1.04536	-5.33341	-5.33341	-4.07909	-1.52486	-0.124278	-0.741977	-3.30122	1.04895	3.13229	0.00714392	0.341032
Iffo2	3.81001	1.67284	4.08684	1.68062	2.00737	2.71459	1.59126	-1.21569	0.850893	3.07358	0.00715785	0.341032
Gm45933	2.0638	-1.27704	-1.27704	-1.27704	-1.27704	0.0808063	0.575456	-1.27704	0.167371	3.44814	0.00716507	0.341032
Gpr82	-2.79763	-4.01503	-0.659543	-1.0584	-1.56321	-0.116168	-3.11635	-0.241215	0.547186	3.07072	0.00720041	0.342034
Cklf	-0.664378	-6.17272	-1.52054	-4.97215	-1.03895	-0.293996	-1.48602	-0.711695	1.68425	3.06931	0.00722145	0.342051
LOC118568080	2.98167	0	1.35015	0	2.44033	3.69882	0	0	0.27132	3.44263	0.00722935	0.342051
2210408F21Rik	4.02964	0.1657	-1.21527	3.09101	1.56391	0.987905	4.1851	0.273771	0.774512	3.06608	0.00726989	0.342817
Gm18848	-6.00325	-4.6228	-3.36809	-2.24964	-1.86078	-3.39574	-1.88362	-2.88233	0.924279	3.06534	0.00728117	0.342817
Lpxn	-2.06469	-3.45323	-2.10251	-2.25431	-3.45323	-2.35698	-1.60113	-3.45323	0.20526	3.19551	0.0073016	0.342817
Zbtb49	-2.73391	-3.16931	-2.26566	-2.89504	-1.22524	-0.87033	-4.18769	-2.93014	1.04335	3.01828	0.00730281	0.342817
Rbm41	1.69899	-3.20396	0.922844	-2.0037	0.340237	0.195685	2.10361	2.56317	1.1164	3.06015	0.00735983	0.344817
Gm46967	0.239293	1.17925	0.351075	-0.985621	-2.29946	0.865583	-1.57151	-3.26849	0.618282	3.05473	0.00744294	0.34803
Fst	2.04773	-1.21122	2.092	1.53349	-0.258229	-1.21122	0.55649	2.49979	0.368994	3.10504	0.00754194	0.351497
Homer3	4.26921	0.98654	3.55644	2.67714	3.90153	2.98708	-0.299653	0.26605	1.05019	3.00296	0.00754645	0.351497
Kcp	0	2.1301	0	1.11307	3.04805	0	0	0	0.143455	3.62028	0.0076374	0.355043
4930445E18Rik	1.20624	0	0	0	2.43649	0	2.891	2.13895	0.171411	3.40407	0.00769642	0.357093
Pvalb	-3.30074	-3.90137	-1.77642	-1.38778	-2.08301	-1.47058	-1.11793	-2.32043	1.9159	2.99241	0.0077188	0.357439
Smtnl2	0.322101	-0.463114	-1.89929	-0.700348	-1.89929	-0.784894	-1.89929	1.81468	0.227338	3.16508	0.0077344	0.35747
Gm38525	1.26978	0	0	2.85244	0	0	3.1073	1.43026	0.192607	3.39606	0.00779739	0.359204
Cage1	0.807558	-3.86952	-0.497712	-3.86952	2.05777	-0.375833	0.806766	-1.29391	1.0909	3.08701	0.00781749	0.359204
Gm29514	1.20679	1.26279	2.54579	0	0	0	3.55591	2.51334	0.221825	3.25152	0.00789068	0.359204
Gm7333	1.08165	-1.27677	-1.27677	-1.27677	2.0849	-0.162325	0.898713	0.769481	0.233277	3.25612	0.00790953	0.359204
Stab2	0	0	1.05598	0	0	0	4.40992	0	0.217539	3.9503	0.00791744	0.359204
Kcnq1	0	2.02728	0	0	4.66263	1.09659	0	0	0.23843	3.59474	0.00792323	0.359204
Ccdc62	-1.19773	2.23621	-0.422737	-0.114534	0.290362	-1.14742	1.80878	-2.41525	0.552541	3.02434	0.00792685	0.359204
Acad12	-2.72898	-3.9363	-2.87935	-3.9363	-0.86609	-3.9363	-1.99989	-2.42488	0.277163	3.15062	0.00794914	0.359204
C1qtnf1	-1.20993	0.181486	0.141166	-1.20993	1.93031	-0.0960831	-0.330516	-1.20993	0.166108	3.14983	0.00796104	0.359204
Lhb	-2.96594	-1.98693	-1.69415	-3.26311	-1.10246	-3.44416	-1.92796	-4.9093	3.54159	2.97746	0.00797	0.359204
Ttpa	1.89956	0.168162	1.20816	-1.61129	-1.01153	1.41236	-0.0842871	-2.81324	0.660724	3.0217	0.00797031	0.359204
Dnah11	0.190527	-0.23089	-1.91596	-4.45289	-5.6534	-0.549132	-0.00879808	-1.7886	1.53354	3.02153	0.00797315	0.359204
Calr3	-2.26517	-3.47242	-1.87452	-0.498326	-1.34901	-2.35769	-1.90389	-3.47242	0.268673	3.08329	0.00797649	0.359204
Trp53inp1	1.4249	-0.0406067	-0.542601	-2.12236	0.67502	-0.838163	0.806209	-3.24887	0.68427	3.01884	0.00801778	0.359204
Trim30a	0	0	3.47688	4.11668	0	0	3.49426	3.45713	0.438678	3.37492	0.0080705	0.359204
Ptov1	0.262024	-0.433414	-0.596474	-0.0186109	-0.52036	-0.0491	-0.875452	-0.946533	4.06364	2.97149	0.00807259	0.359204
Itpr2	1.96824	1.3813	3.59187	2.84613	3.12035	4.38151	3.98759	4.70712	0.704613	3.01492	0.00808319	0.359204
Piezo1	0	1.38404	1.0547	3.31	0	1.11368	0.879072	0	0.148932	3.23793	0.00808351	0.359204
Dusp15	-1.93151	2.07452	4.39507	1.93956	1.67724	0.947848	1.57621	-0.555809	0.782305	3.01449	0.00809047	0.359204
Frmd7	-0.639484	0.0811989	-0.886957	1.08779	-1.94645	-0.104395	2.01625	-1.94645	0.354796	3.06887	0.00810531	0.359204
Zbbx	1.30641	0	5.00671	0	3.57021	4.61828	3.65636	3.73249	0.719835	3.13839	0.00813569	0.359204
Atf7ip2	-0.629286	1.05317	1.28881	-0.05665	-1.89934	-1.89934	0.7022	-1.89934	0.263386	3.13671	0.00816166	0.359204
Chuk	-2.56992	0.146551	-0.674635	-1.59782	-1.07027	-1.46438	0.54667	-5.7443	1.56315	3.0099	0.00816778	0.359204
Chrd	4.91764	5.12248	0.190664	2.95069	4.09102	3.77016	2.3906	0.341831	1.46004	2.96494	0.00818671	0.359204
Anln	-4.3154	-2.88589	-2.89587	-1.47362	-0.910738	-2.31304	-0.86617	-4.3154	0.463002	3.06309	0.00819927	0.359204
Slc26a4	-0.142171	-0.086175	-0.292964	1.80734	1.60332	-1.34888	-1.34888	-1.34888	0.213553	3.13341	0.00821283	0.359204
Grid2ip	0	0	0	3.49393	0	0	1.27338	3.44711	0.221278	3.56979	0.00821348	0.359204
Bfsp1	2.4909	-0.0142306	-1.27687	-1.27687	1.31323	-1.27687	-1.27687	-1.27687	0.208165	3.36337	0.00822404	0.359204
Gm32788	-1.09412	-1.09412	1.65384	-1.09412	-1.09412	-1.09412	2.33159	-1.09412	0.172822	3.56851	0.00822868	0.359204
Nlrp3	2.95103	1.3904	3.56871	1.26777	0	1.09974	1.27848	4.20677	0.371356	3.06091	0.00823494	0.359204
Isl2	1.75672	1.49191	0.890013	1.29132	-0.108576	-1.34832	-1.34832	-1.34832	0.25612	3.13186	0.00823703	0.359204
Kcnh3	-0.554533	4.24395	3.30746	3.8506	3.97183	2.6144	3.36601	2.86494	1.67256	2.96012	0.0082717	0.36006
S100a4	-1.97032	-0.0666062	-1.31402	-3.27732	-3.27732	-3.27732	-3.27732	0.0494237	0.286774	3.22089	0.00833224	0.362036
Calcoco2	-1.81786	-3.02448	-0.787695	-3.02448	-1.78436	-3.02448	-0.444866	-1.6533	0.205841	3.12433	0.00835553	0.362391
Gm2517	-3.20244	-3.20244	-3.20244	-0.925623	-3.20244	-0.697954	-1.50391	-1.13709	0.224503	3.54416	0.00839387	0.363395
Slc5a11	0.824771	1.90563	-1.35898	-0.648257	0.903995	-2.42444	-2.42444	-2.42444	0.406286	3.11945	0.00843328	0.364443
Col19a1	0	1.43591	3.93495	0	0	0	0.878527	0	0.152025	3.55025	0.00844877	0.364454
St3gal1	-3.97511	-2.41377	-2.14149	-3.97511	-0.771291	-3.97511	-0.983407	-3.97511	0.346391	3.21118	0.00847755	0.365038
Card9	0.540471	-1.87059	-0.0342147	-0.751587	2.1277	1.31002	0.457868	0.877177	0.407997	2.98875	0.00853421	0.365599
Fam217a	1.26952	2.45059	0	0	2.47486	1.11351	0	0	0.132286	3.46835	0.00853606	0.365599
H2-M5	-1.80773	-1.80773	0.323604	-0.606258	-0.858967	1.50715	-0.238771	2.09712	0.313325	3.04289	0.00853639	0.365599
Zfp759	-1.95742	-1.99974	-1.47068	1.12349	0.0898158	1.598	-1.30106	-0.221141	1.02893	2.9429	0.00858288	0.366155
Mipep	1.15889	0.275995	0.0984992	-0.252421	0.475411	-0.470922	1.16692	1.47116	2.87783	2.94226	0.00859467	0.366155
Glt8d2	0	3.36103	3.24134	3.36812	3.30568	0	2.11265	0	0.363269	3.20336	0.00859657	0.366155
Slc4a5	-0.776246	-4.06653	-4.06653	-1.78955	-2.76353	-2.03894	-4.06653	-4.06653	0.335436	3.2024	0.00861119	0.366155
Sim1	0	1.38398	3.16789	0	0	0	1.99487	2.60731	0.179018	3.33338	0.00863691	0.366155
Col6a3	3.68135	0	0	3.69273	2.75947	3.00642	1.25065	4.62395	0.537592	3.10663	0.00864117	0.366155
Klhl4	-0.0227244	-1.71528	-4.24055	-0.130526	-0.994264	-0.936014	-1.79463	-4.24055	0.672785	3.03532	0.0086663	0.366155
Gm39326	-1.34837	-1.34837	-1.34837	1.9241	2.01998	-0.114849	2.00515	0.0224837	0.331137	3.10437	0.00867836	0.366155
Cgnl1	1.55299	1.43711	1.35454	0.885926	0.227674	-0.095104	-3.99358	-2.64379	1.27364	2.98021	0.00868703	0.366155
Fam163a	-2.55647	-1.29333	0.874334	0.551518	-1.60867	-1.32351	-2.55647	-2.55647	0.254453	3.10035	0.00874487	0.36763
Bbc3	-1.629	-3.59684	2.02606	2.19724	0.403229	0.672039	2.29377	-3.59684	1.29862	3.03035	0.00875274	0.36763
Dhx37	-0.115849	-0.506891	1.27117	-2.2842	-0.0159622	0.0292382	-4.17778	-2.10651	0.94336	2.9755	0.00877233	0.367808
Cyth4	0	2.08922	0	1.30274	2.4248	0	2.89055	3.57336	0.26189	3.19028	0.00879937	0.367912
Twsg1	-0.532284	0.985642	-3.27259	-0.798919	-1.57608	0.908536	0.321295	-0.840871	0.62216	2.97252	0.00882686	0.367912
Sh3d21	0	0	1.43766	0	3.13889	0	1.13352	0	0.137114	3.51901	0.00884	0.367912
9430038I01Rik	-2.00372	-1.89773	-1.63384	1.1557	-0.125673	1.19424	0.994843	-3.27902	0.706977	2.97166	0.00884257	0.367912
Sp100	0	0	0	1.2709	0	3.38185	0	1.33248	0.152371	3.51787	0.00885471	0.367912
Tmprss5	-3.85885	-2.43191	0.197655	-0.347582	-3.85885	0.619078	-2.52063	-1.76175	0.579896	3.02385	0.00886701	0.367912
Shc4	0.790566	-0.975773	-3.20146	0.836604	-0.501865	-0.123402	0.497984	-3.20146	0.585601	3.02044	0.00892765	0.369363
Morc4	-1.09382	-2.93429	-3.74468	-1.8245	-1.68181	-1.12983	-0.623535	-2.61229	1.34042	2.92367	0.00894401	0.369363
Pcsk5	-2.01306	-0.623741	2.28925	0.869804	-0.778973	0.613831	1.65436	-0.639483	0.445652	2.96594	0.00894828	0.369363
Zbed4	-5.08526	-5.08526	-2.02603	-3.25233	-2.31763	-1.78937	-3.87406	-1.56919	0.55033	3.01522	0.00902111	0.371178
Lrat	-1.61542	-1.45297	-1.60771	-2.63821	-1.73786	-0.526056	-1.5794	-2.37336	1.24565	2.91897	0.00903468	0.371178
Iglon5	2.93825	0	2.0596	3.61978	3.16435	3.5672	2.76497	0	0.434309	3.08166	0.00906114	0.371178
Nkpd1	0	0	3.425	1.11279	0	0	0.878447	0	0.119209	3.50132	0.00907022	0.371178
Esm1	0	0	1.0543	0	0	1.09539	2.80625	2.04561	0.12921	3.6299	0.00907724	0.371178
BC049352	-1.84822	-2.52449	-1.52096	0.363969	-1.34148	0.029883	0.928406	-3.80231	0.681177	2.95785	0.00909982	0.371178
Xrra1	2.61521	0	2.05454	3.51967	3.35508	3.95494	5.18119	2.09766	0.628846	3.01082	0.00910078	0.371178
Pstpip1	0	3.62836	0	0	1.99161	3.68203	1.90559	0	0.297293	3.29657	0.00917385	0.373522
Gm17980	3.53716	1.26304	1.59735	2.73687	0.947628	1.80209	0	1.43007	0.244721	3.53721	0.00920206	0.374035
1700125H20Rik	-1.09503	-1.09503	1.14108	-1.09503	-0.148518	2.16549	0.0383007	0.276086	0.185208	3.06779	0.00930346	0.375781
Otof	4.05382	2.03175	6.1548	3.31299	5.06785	4.10662	4.55207	0	1.13593	2.99978	0.00930379	0.375781
Lcn3	-2.03699	-2.03699	-0.981848	-0.923626	-0.28428	1.15233	-2.03699	-2.03699	0.171254	3.71887	0.00930614	0.375781
Csf2ra	0.751638	-2.25409	-0.914351	1.34433	1.11367	2.53282	-2.25409	0.587865	0.597042	2.9975	0.00934631	0.375781
Efcc1	-4.44708	-1.31335	-3.03765	-0.53435	-0.820702	-3.34196	-4.44708	-4.44708	0.48267	3.06519	0.00934957	0.375781
Trim30c	0	0	0	1.11275	1.44642	0	2.84038	0	0.114982	3.48009	0.00935481	0.375781
Dnajc25	-1.09534	-1.09534	-1.09534	0.106082	1.54101	2.26785	0.602641	-1.09534	0.206659	3.15571	0.0093595	0.375781
Sdc1	0.906159	-3.07991	1.33617	-1.87804	-1.60166	-1.28717	0.370156	-0.0365025	0.547189	2.94374	0.00937058	0.375781
Hspb1	0.917182	0.673218	-0.358194	0.169258	-0.437094	-0.262941	0.665824	0.885292	3.17076	2.90025	0.00940492	0.376189
Ifi203	0.629348	2.31536	0.33325	-1.90006	0.513379	-0.669324	1.4617	-1.90006	0.406524	2.99399	0.00941219	0.376189
Dipk2b	3.22684	-1.82218	2.51252	-0.620055	3.24391	0.0185355	2.78143	2.40253	0.955005	2.93969	0.00944985	0.377065
Radil	-2.05295	-2.22991	0.57343	0.83045	0.297535	0.374701	1.40329	0.282861	3.63405	2.8969	0.00947284	0.377353
Nrde2	0.440546	1.01851	1.74443	1.79886	1.15448	-4.21813	-0.0900099	-0.0901977	1.53817	2.9369	0.00950486	0.37776
Gsx1	3.61508	2.99887	2.83107	2.57282	3.65957	3.8461	0.898464	3.1385	0.541884	2.93635	0.00951575	0.37776
Spsb1	-2.51431	-3.57202	-2.66934	-0.739887	-2.92652	-3.24474	-0.367426	-2.8992	0.707687	2.89348	0.00954248	0.37776
Hapln3	-3.31054	-3.31054	-2.25341	-0.357921	-0.351715	-2.07772	-1.74181	-1.97706	0.289126	2.98692	0.00954618	0.37776
Artn	-1.87036	-1.87036	-1.87036	-0.566561	-1.87036	1.62361	-1.87036	-1.87036	0.175387	3.46356	0.00958314	0.378157
Afmid	-2.23226	-4.63826	-1.40676	-3.35261	0.047329	-1.22335	-1.64662	-2.47966	0.714398	2.93272	0.00958779	0.378157
BC055324	3.69952	1.26365	1.43425	3.75039	0	1.115	1.28458	1.37078	0.305668	2.9827	0.009627	0.379079
Gm8843	-3.39175	-1.36388	-0.522619	-1.45952	-2.43872	-1.22411	-1.51398	0.308151	0.369314	3.02698	0.00964683	0.379236
Lox	1.75044	0.947405	-1.05804	-0.209272	2.243	-1.01009	2.25355	-0.638938	0.613392	2.88591	0.00969873	0.380048
Car12	2.04647	-1.21042	2.17841	0.0918019	0.58428	-1.21042	1.97029	-1.21042	0.309595	3.04592	0.00969923	0.380048
Ticam2	-2.11374	-2.11374	-2.11374	-2.11374	-2.11374	-2.11374	0.573269	-2.11374	0.110492	3.78063	0.0097156	0.380067
Susd1	0	0	0	1.20144	0	2.07211	3.63506	2.45789	0.240109	3.25952	0.00974974	0.38049
1700017N19Rik	0	0	0	3.75941	0	0	0.879146	0	0.152596	3.77704	0.0097582	0.38049
Dusp12	-0.347663	-0.70648	-1.30249	-0.561075	0.13482	-0.879083	0.166547	-0.244025	3.63166	2.88101	0.00980136	0.381552
Ttf1	-0.674394	-3.43844	-1.98798	-3.6907	-2.308	-0.708102	-0.717573	-2.68992	0.776013	2.87769	0.00987143	0.38336
Tmem125	-1.65238	-5.90703	0.133789	0.074312	-0.466751	-0.432742	1.7802	0.0818052	2.26765	2.91829	0.00987984	0.38336
Dydc2	1.82863	2.02915	2.67826	1.83282	4.40849	2.9579	3.59025	2.02243	0.508623	2.91652	0.00991631	0.384153
Spata18	1.97709	0	0	2.36253	1.79111	0	3.07914	0	0.191409	3.246	0.0099691	0.385574
Kcne3	-3.31036	0.216353	-0.121834	-3.31036	-3.31036	-3.31036	-3.31036	-3.31036	0.282223	3.43264	0.0100262	0.386457
Tmem221	2.19372	-1.09685	1.03434	0.205219	2.22225	2.01547	0.129457	-1.09685	0.324575	2.96206	0.010033	0.386457
Gm26782	-4.00971	-2.64422	-0.223367	-4.00971	0.207198	0.0553103	-1.22639	-4.00971	0.589323	3.02778	0.0100404	0.386457
Foxp3	1.98673	-1.27645	-1.27645	-1.27645	0.518602	1.76681	2.45156	-1.27645	0.322678	3.11522	0.0100629	0.386703
Stum	0.0440771	0.997549	3.95548	2.95228	1.34289	2.62024	2.43496	1.51909	0.780229	2.86542	0.0101349	0.388846
Hs3st3a1	3.46881	2.02727	0	1.11399	1.8129	1.36822	0	2.46987	0.236563	3.01978	0.0101948	0.390516
Fmod	-1.34806	1.8522	1.56226	-1.34806	1.18166	-1.34806	0.220558	1.54089	0.27713	3.01596	0.0102694	0.391852
Lzts1	2.59003	0	3.54916	2.51954	3.10254	4.40281	4.00889	0	0.556666	3.01562	0.010276	0.391852
Slc17a8	-2.71407	-2.53099	-1.70552	-0.806856	-2.17788	-1.09256	-3.92197	-3.92197	0.343051	2.94997	0.0102787	0.391852
Rspo3	0.959759	-0.967368	0.987149	0.534256	-0.103373	0.217431	-2.35083	-2.35083	0.361165	3.0926	0.0103367	0.393436
Snx20	-1.09356	-1.09356	1.37229	-1.09356	-1.09356	-1.09356	0.855586	-1.09356	0.096811	3.40821	0.0103918	0.394905
Dao	-1.65948	-1.65948	-1.65948	-1.65948	0.39421	2.23187	1.07972	-0.326152	0.265471	3.09554	0.0104244	0.395517
Itk	0.160138	-1.21015	-0.154033	0.651042	-1.21015	0.0229237	2.69057	-1.21015	0.225614	3.00658	0.0104549	0.396045
Gm51670	0	3.80041	2.23605	1.30369	0	0	0	0	0.183483	3.40277	0.0104751	0.396185
Gm8125	3.1106	3.46483	0	1.20166	2.51396	3.21631	2.24883	2.85262	0.393706	2.93723	0.0105443	0.398171
Ly6g6e	3.13616	0	0	0	0.944824	0	0	0	0.107651	3.70932	0.0106016	0.399704
Postn	1.27258	4.14156	2.66955	0	1.81477	2.11324	2.62289	4.18559	0.437527	2.93322	0.0106294	0.399773
Fcna	-2.04037	-0.0741935	2.08217	1.20907	-2.04037	0.323831	-0.814056	-2.04037	0.324278	2.99755	0.0106368	0.399773
Gm11907	-3.72033	-5.02704	-5.02704	-2.14086	-3.05043	-2.93413	-2.08199	-2.9761	0.478709	2.93179	0.0106599	0.400014
Nfe2	4.09835	0	0	1.11368	0	1.91093	0	0	0.203163	3.38644	0.0107295	0.40029
Adcy10	0	0	0	2.95985	0	0	0.877943	0	0.0965896	3.69947	0.0107308	0.40029
Ndufb2	0.0204125	0.130347	-0.334833	0.261138	0.696616	0.628846	0.31848	0.289464	7.57085	2.83726	0.0107665	0.40029
Gm35438	0.726704	0.499051	0.822567	-2.08943	-1.99328	-3.2913	-3.2913	0.0452405	0.545196	2.92676	0.0107679	0.40029
C8g	0.951131	-3.07133	-0.414075	-3.07133	-0.424539	-3.07133	-0.364409	-3.07133	0.373736	3.07642	0.0107884	0.40029
St6galnac3	0.457709	-1.72987	0.686027	-0.844632	0.615779	-4.09839	0.897304	-3.03076	1.69797	2.83618	0.0107915	0.40029
Irgm1	0.0942008	0.875032	2.97499	-0.0131054	2.94458	1.48035	1.20571	-1.21256	0.442144	2.87542	0.0108017	0.40029
Efcab12	0.548256	0.0349232	-1.34901	-0.235324	-1.34901	1.94013	0.0148436	-0.0161205	0.203843	3.05149	0.0108083	0.40029
Trim36	3.33968	4.13565	2.23693	2.17139	4.07922	0	3.01858	2.93283	0.546023	2.9241	0.0108254	0.40029
Wnt11	2.8961	0	3.10118	3.48457	0	1.10366	4.27356	2.16491	0.442643	2.98646	0.0108644	0.40029
Tmc6	-0.610677	-5.87457	-0.302254	-0.737522	-2.4158	-1.18347	0.193868	-2.56745	2.59814	2.83296	0.0108663	0.40029
Ppef2	0	1.39146	1.35124	0	0	0	3.28572	1.37099	0.152279	3.19372	0.0108679	0.40029
Gm31288	0.448343	-3.93679	-3.93679	-2.16441	-3.93679	-3.93679	-3.93679	-2.56435	0.333262	3.19094	0.0109181	0.400888
Nexn	3.2804	2.03589	2.12696	-0.828006	-0.829993	2.4301	3.30153	-2.10654	1.04436	2.86895	0.010948	0.400888
Gm13186	0.111745	0.36283	-0.273523	0.321135	0.778643	0.724807	0.355453	0.486377	4.61156	2.82922	0.0109541	0.400888
Gm6203	-1.43371	-0.0497132	-1.43371	1.59315	-1.43371	-0.319832	0.68225	-1.43371	0.169221	3.24368	0.0109633	0.400888
Tuba8	-2.59108	-2.57705	-1.9557	-1.86925	-1.74403	-2.68047	-1.26318	-2.90205	2.08566	2.82863	0.0109679	0.400888
Fam178b	-0.00688792	0.159393	2.15324	-1.2768	0.985527	-1.2768	1.05867	-1.2768	0.22496	2.9768	0.0110669	0.403833
Ltbr	0.494473	1.69056	0.707738	-1.51588	1.91682	-0.663404	2.10172	-0.188934	0.84461	2.8238	0.0110822	0.403833
Fgg	0	1.26221	0	0	3.89848	0	0	1.33264	0.171879	3.36266	0.011112	0.404305
Ccdc61	-0.483191	-3.19905	1.13223	1.35222	0.168604	2.05807	-1.2334	1.93741	1.87728	2.81813	0.0112181	0.407546
Dennd2c	2.12065	0	2.80522	0	0	1.27866	3.11718	0	0.205121	3.16882	0.0113254	0.409601
Apobec1	1.83901	-1.27716	-1.27716	-1.27716	-0.33154	-0.16354	-0.143659	-1.27716	0.142451	3.40935	0.011331	0.409601
Cox4i2	1.03139	0.525525	0.273618	-0.458369	0.684406	-0.61873	0.804696	1.76036	1.47496	2.8134	0.0113326	0.409601
Aloxe3	-4.20797	0.458256	-0.232381	0.560499	-0.6697	0.127985	-3.0093	-2.8621	0.882045	2.85177	0.0113468	0.409601
Pth2r	-4.10844	0.263295	-1.69504	-4.10844	-0.829917	-0.285033	-2.52727	-0.590945	0.63725	2.90005	0.0113602	0.409601
Cenpt	-1.43293	-0.0489806	-1.43293	-1.43293	1.81044	0.478082	0.217782	-1.43293	0.196338	3.03983	0.0115222	0.411495
Gm29797	0.0976396	-1.53234	-2.96767	-2.96767	0.810527	-2.96767	-2.96767	-0.0951655	0.339543	3.03855	0.0115489	0.411495
Spice1	-1.60534	1.85796	0.45603	-0.38618	-2.29645	0.287841	0.291723	-2.15575	0.824506	2.80393	0.0115654	0.411495
Vwce	0	0	1.3513	2.41924	1.24063	0	2.65593	0	0.146164	3.15584	0.0115719	0.411495
Gm34232	-0.794204	-2.10123	-2.10123	-0.401378	0.795975	-1.00471	0.954978	-2.10123	0.230967	2.95296	0.0115834	0.411495
Lgals1	0.259808	0.33149	0.0942156	-0.437652	0.133431	-0.421098	-0.347619	0.777681	3.43375	2.80298	0.0115892	0.411495
Xylb	0.658408	-2.11679	-2.11679	-0.274109	1.23076	-0.883844	-0.548378	-2.11679	0.25694	2.9525	0.0115934	0.411495
9430053O09Rik	-3.5246	-3.5246	-3.5246	-2.32313	0.431528	-1.16064	-2.3917	-3.5246	0.310586	3.03613	0.0115992	0.411495
Pcdhb20	-0.389431	-1.6595	0.766114	0.62585	1.02968	-1.6595	1.77642	-1.6595	0.266656	2.9762	0.0116157	0.411495
Sgcz	-1.75333	0.964214	-2.51993	-0.369726	-2.04554	-1.76119	0.111465	-0.179507	0.821526	2.79998	0.0116641	0.411495
Bves	-1.0895	-2.63834	-1.37152	-0.18232	0.807058	-0.350145	-0.346629	-5.18659	1.38027	2.83845	0.0116662	0.411495
Gm8273	1.20554	1.26144	0	0	0	2.97295	0	0	0.113893	4.13314	0.0116676	0.411495
2700049A03Rik	1.61129	0.218323	1.68341	-0.658752	0.867595	-0.059723	2.78599	-1.85362	1.56829	2.79869	0.0116964	0.411495
Sctr	1.37072	0	1.43677	0	3.2252	0	1.27443	1.37108	0.176084	3.03129	0.0117008	0.411495
Hmcn1	-2.40439	-3.61062	-2.5555	-3.61062	-3.61062	-2.25284	-3.61062	-2.24028	0.170179	3.03097	0.0117076	0.411495
Ptchd4	0	1.98315	4.07085	5.36193	5.18448	4.40527	3.72244	4.51152	1.02831	2.88493	0.0117099	0.411495
Smg9	-2.5351	-4.51016	-3.10683	-2.73109	-2.15733	-0.445045	-1.63035	-0.449834	0.62195	2.83661	0.0117108	0.411495
Cbx2	0	0	1.43467	3.7876	2.56649	2.71043	1.13299	1.37142	0.281577	2.94674	0.0117221	0.411495
Ano8	3.17605	2.81743	-0.191836	0.0158264	3.43958	2.32893	-0.0279434	-1.27113	0.676918	2.83449	0.0117628	0.41169
Nrf1	-2.50949	-0.425494	-0.561419	-0.580456	-0.0409096	0.289968	-2.23831	-0.793814	2.85373	2.79552	0.0117763	0.41169
Gm34759	1.20612	0	0	0	1.79003	1.78716	0	3.32728	0.160533	3.14375	0.0118066	0.41169
Cldn7	-2.21688	-4.59295	-0.0806025	-1.22663	-0.511738	-0.217832	-2.19528	-3.10388	0.773695	2.83246	0.0118125	0.41169
Ppp1r1a	0.0534384	0.859956	0.557451	-0.215447	0.443945	1.13756	-0.0580854	-0.453439	3.04169	2.7937	0.0118225	0.41169
LOC630077	2.29235	0	0	1.84463	0	0	0.878998	2.83231	0.145346	3.14132	0.0118543	0.41169
Pus1	2.49096	0.304452	3.04611	2.7312	-0.0541296	2.86066	1.12801	2.71551	2.50621	2.79225	0.0118592	0.41169
Synpo2l	-1.21024	2.238	-1.21024	-0.0961215	0.0939768	-0.0956492	1.9479	0.160379	0.251071	2.87786	0.0118773	0.41169
Trim68	-4.16983	-0.964621	-0.669623	-1.01353	-0.847726	-4.16983	-1.51172	-2.79547	0.524043	2.87699	0.0118981	0.41169
Eda	1.27868	-0.2625	1.02229	-2.82406	-1.08836	1.40367	-0.936852	-4.0243	1.08449	2.82755	0.011934	0.41169
Fes	-3.44413	-3.44413	-1.4834	-2.24522	-1.65291	-3.44413	-1.75202	-3.44413	0.194543	3.01921	0.0119583	0.41169
Gm11218	1.95702	1.34104	1.51701	1.45987	-0.0589201	-1.81384	0.419791	1.29109	0.479602	2.82656	0.0119587	0.41169
Kremen2	0	2.59819	2.61409	0	0	0	0	0	0.112671	3.61145	0.0119651	0.41169
Bmp3	-0.868431	0.72073	-1.82553	0.364591	-2.21044	-3.16995	-1.40289	-0.375413	0.429442	2.82617	0.0119684	0.41169
Cdhr3	0	1.38931	0	2.92847	2.75447	4.49005	2.80151	3.03029	0.446235	2.93274	0.0120406	0.413037
Ulk4	2.25349	-1.83222	-1.71083	1.27744	0.849967	-1.88711	0.421691	-3.11298	0.78593	2.82303	0.012047	0.413037
Mdc1	2.06506	3.95669	1.88961	-1.9011	2.83804	0.544525	1.71818	3.5003	1.14435	2.82131	0.0120902	0.413037
Sapcd2	1.91261	-1.27665	-1.27665	-0.162425	0.410515	0.948398	1.91621	-1.27665	0.263965	2.93011	0.0121013	0.413037
Nuggc	0	0	1.05396	3.18425	0	0	0	0	0.113119	3.60201	0.0121064	0.413037
Myh14	7.01671	4.25307	3.3258	5.06364	5.84859	6.74076	4.46407	5.47308	1.97576	2.82013	0.0121201	0.413037
Acr	3.08378	-1.42495	-1.42495	1.87829	-1.42495	0.628965	-0.157681	0.00420423	0.364198	2.92895	0.0121284	0.413037
Gpr50	-2.20705	-2.24575	-1.96138	-1.95167	-1.15479	-1.21141	-1.31601	-2.09968	3.51971	2.78029	0.012168	0.413799
Fer1l5	0	1.36496	0	0	0	3.17983	0	1.33233	0.13552	3.29855	0.0122171	0.414879
Gm34878	0	0	2.41039	0	1.78771	0	1.69424	0	0.100675	3.29684	0.0122482	0.415346
F8	-5.86166	-1.30891	-1.1423	-1.30005	-2.5452	-4.02106	-3.83598	-1.99944	1.02299	2.81421	0.0122706	0.415517
Elovl7	-1.52639	-2.61649	-2.88565	-0.389353	-3.02853	-0.749049	0.733805	-1.01931	0.851526	2.77559	0.0122916	0.415641
Prg4	-1.97302	-2.22719	-3.21643	-2.91463	-1.19654	-3.87535	-1.89178	-6.04554	1.97596	2.77486	0.0123107	0.4157
Vill	3.11037	0.263132	3.45926	2.10108	2.17851	0.14436	4.64914	0.257804	0.774073	2.77154	0.012399	0.418089
Zfp384	-1.3579	1.60448	0.976222	-2.31054	0.532168	0.304815	-1.64988	0.906522	3.2055	2.77075	0.01242	0.41821
Aldh16a1	-2.88605	-1.60898	-4.83952	-2.94026	-1.54415	-1.09263	-1.90238	-2.55724	0.611273	2.80588	0.0124855	0.419824
Barhl1	0	0	0	1.90521	0	1.09609	3.90093	0	0.190048	3.28287	0.012505	0.41989
Insm2	2.48297	3.54186	2.48584	2.22187	1.45124	1.92483	0	1.37143	0.28358	2.92584	0.012595	0.421894
Haao	1.26968	0	1.05506	1.30392	0	3.12377	1.99604	0	0.166968	2.99025	0.0125999	0.421894
Ly6i	2.34099	0	3.05624	0	0	0	0	1.37021	0.135427	3.27471	0.0126575	0.423232
Nlrp6	0	0	1.05317	0	0.944098	0	2.32915	0	0.0779999	3.27156	0.0127171	0.423961
Tsen54	-3.37755	1.84115	0.429234	-0.200984	1.19962	-2.2605	1.36953	2.02524	1.05472	2.797	0.0127188	0.423961
Zfp819	-3.81505	-1.13488	-0.492559	-0.303262	-0.518313	-2.54603	-0.630617	-3.81505	0.505099	2.84237	0.0127547	0.423961
Angpt2	-0.23076	-0.64394	-3.19217	-2.07502	0.605859	-0.925152	-2.30549	-1.85657	0.375273	2.79471	0.0127796	0.423961
Gm33274	0.741215	2.96328	0.625007	0.0515607	1.91288	-1.21275	2.01323	2.06798	0.456442	2.7947	0.0127799	0.423961
H2-Eb2	-1.27711	-1.27711	0.150183	2.33865	-1.27711	-1.27711	-1.27711	-1.27711	0.152968	3.26785	0.0127874	0.423961
Ggt1	-2.96674	0.19162	-0.363942	-0.24124	0.459216	0.00476198	-5.38626	-3.31251	1.5251	2.79382	0.0128033	0.423961
Dock8	1.8008	1.39782	1.51771	-1.82383	-1.9172	0.90292	1.20191	2.2704	1.47706	2.75563	0.0128302	0.424264
Pon3	0	0	2.24401	0	4.65566	0	3.69397	0	0.356434	3.26332	0.0128739	0.424589
Chrna10	0.11093	1.82373	-1.09671	0.017912	1.34498	0.606611	2.98058	-1.09671	0.311875	2.83768	0.0128755	0.424589
Zfp14	-1.07828	2.9315	-2.38432	3.02073	1.69004	1.50888	-2.38432	3.00092	1.0852	2.83683	0.0128977	0.424736
Smpd5	-1.18605	-1.63014	0.289698	-2.334	-0.284767	-3.62476	-2.41328	0.792725	0.542719	2.78649	0.0130006	0.427282
Pus10	-0.0685573	-0.668345	-4.59167	-0.214598	-0.500305	-2.87677	-0.561958	-5.23288	2.74802	2.74913	0.0130107	0.427282
Rtel1	1.20865	0	3.48546	2.83603	3.48666	1.11588	0.883613	3.47317	0.352584	2.83122	0.0130439	0.427474
Lrrc14	4.90115	5.07543	3.83577	5.72795	4.58158	4.64449	3.97373	3.81745	2.71992	2.74765	0.0130522	0.427474
Dock2	1.39847	0	1.05404	0	0	3.02241	0	0	0.117011	3.37311	0.0130961	0.428324
Adamts9	3.85398	0	2.81873	1.77283	0	2.1372	3.64894	1.33571	0.377384	2.88661	0.0131542	0.429637
Dph7	0.868021	0.926442	0.517546	-2.80052	-0.713348	2.58012	1.57046	1.00109	1.56176	2.74245	0.0131987	0.430044
Shf	0.803928	-0.0101321	-2.56571	-1.43933	1.86308	0.881668	2.18602	-0.406783	0.67974	2.7791	0.0132026	0.430044
Fhdc1	0	2.11323	1.95983	1.11331	2.89653	0	1.22866	0	0.165981	2.96231	0.0132525	0.431084
Gm2736	-1.80742	-0.544129	1.07171	0.188368	-0.503483	-0.451821	-0.92619	1.78922	0.26912	2.85224	0.0133306	0.432266
Fam20a	-1.21307	1.39724	1.81636	2.9241	2.38654	1.51768	1.53922	0.21388	0.485938	2.77404	0.0133425	0.432266
Rarres1	-2.03637	-2.03637	0.546939	-0.765439	-2.03637	0.356011	-2.03637	-2.03637	0.148963	3.07031	0.013343	0.432266
Zranb3	-0.0410105	-0.552138	1.30314	-0.0987217	-0.134487	-0.584916	-0.368843	2.41925	0.394524	2.73593	0.013385	0.432363
Tmc8	-1.35014	-1.35014	-1.35014	-1.35014	-0.404833	1.77352	-1.35014	-1.35014	0.128719	3.23636	0.0134019	0.432363
Nmur2	-1.09647	1.39651	0.501943	1.92746	2.10138	-1.09647	0.175458	1.69061	0.291843	2.90563	0.0134073	0.432363
Spata1	1.30242	-4.16179	-1.01707	-2.96177	-0.640762	-0.942221	-0.625446	-1.54648	0.803853	2.77133	0.0134182	0.432363
Mcoln3	-2.90419	0.721639	0.209205	0.961308	0.0982474	0.830025	0.244635	-4.97798	1.68938	2.76785	0.0135159	0.434926
Tmem119	0	1.26185	0	0	3.11085	0	2.04088	0	0.143925	3.22758	0.0135788	0.435622
Lamc3	1.37061	0	2.6443	2.3861	0	1.09608	2.71022	0	0.189208	2.94813	0.0135969	0.435622
Ltbp2	-2.17216	-2.17216	-2.17216	-2.17216	0.93875	-2.17216	-2.17216	-0.8019	0.147549	3.22549	0.0136213	0.435622
Dennd6b	-0.445944	-0.705797	-0.558237	1.4636	1.61603	0.790057	0.876584	0.943366	2.25237	2.72708	0.0136422	0.435622
Spats1	0	0	2.94312	1.20138	0	1.35891	0	1.37017	0.12598	3.05669	0.0136502	0.435622
Slc6a5	-0.511305	-1.89933	-1.89933	-0.697882	-1.89933	0.702823	1.5763	-0.387586	0.253453	2.86719	0.0136541	0.435622
Rbm20	-1.40761	-1.01493	-3.72028	-5.6157	-1.8223	-0.775887	-2.33663	-4.23861	1.06244	2.76222	0.0136757	0.435622
Mocs3	2.40302	1.98753	2.4672	1.77174	2.05061	0	0	0	0.177858	3.06672	0.013724	0.435622
LOC118567948	0.175255	0.4733	-1.09429	-1.09429	-1.09429	-1.09429	1.98044	-1.09429	0.138749	3.05282	0.0137389	0.435622
A730094K22Rik	1.37117	0	1.05432	0	0.945336	2.81644	0	1.37091	0.129878	3.25076	0.0137563	0.435622
Zfp324	0.0699021	-0.648538	-2.94302	-1.74153	0.944995	-1.66562	-2.94302	-1.51326	0.342937	2.80463	0.0137603	0.435622
Bean1	2.99328	-0.491745	2.98727	2.2465	-1.77144	-0.508511	2.52062	0.283166	0.74328	2.75896	0.0137689	0.435622
Mrgprf	1.30706	2.02703	0	0	2.7202	0	0	0	0.123039	3.21803	0.0137741	0.435622
Fam193b	-3.4255	-0.249208	-0.263565	-0.742894	-4.43923	1.64938	-0.658767	-0.222304	1.79953	2.72194	0.0137936	0.435659
Gm26777	-1.80643	-1.80643	-0.751741	-0.693312	0.914961	-1.80643	0.144845	-1.80643	0.148166	2.93875	0.0138298	0.435659
Cep128	-0.488735	0.793752	-2.79338	-3.94915	-1.03299	-3.9648	0.0396964	0.695645	1.40429	2.72009	0.0138486	0.435659
P3h1	-0.00121188	0.156313	0.986308	-1.27387	-0.0396684	3.0126	1.69722	2.57454	0.44234	2.75536	0.0138727	0.435659
Ephx4	1.01677	0.0597252	0.484687	-0.0131012	1.31313	0.241052	3.0466	2.25332	0.625509	2.71864	0.013892	0.435659
Gm32186	-0.543602	-1.7495	-1.7495	-1.7495	-1.7495	0.610975	0.707453	-1.7495	0.142505	3.04477	0.0139251	0.435659
Cdh23	0	3.62421	0	0	0	1.68637	1.22787	0	0.160643	3.20956	0.0139498	0.435659
Aldh3a1	-4.44001	-4.44001	-4.44001	-4.44001	-4.44001	-4.44001	-4.44001	-4.44001	0.222271	4.05595	0.0139576	0.435659
Tcap	1.36842	1.22146	0.485499	-0.14878	-1.34777	-1.34777	1.25484	2.2739	0.301337	2.79735	0.0139633	0.435659
Ccdc60	-0.958185	0.149946	-2.30611	2.00249	0.560054	-0.673198	0.620102	-1.96767	0.822255	2.71549	0.0139862	0.435659
Syt12	-0.835811	-0.126057	-1.02426	-0.950889	-0.532477	0.874346	-0.197231	-1.41904	1.7859	2.71505	0.0139995	0.435659
Gm4852	0.220278	0.279923	0.409849	0.550564	0.084614	0.15148	1.40239	0.186863	2.76301	2.71484	0.014006	0.435659
Cckar	0	1.3915	3.40596	0	0	0	1.95089	0	0.138531	3.20659	0.0140118	0.435659
Dnah7a	-1.21183	2.68894	2.20573	1.40341	0.791762	-0.110426	1.91184	0.16032	0.39698	2.74791	0.0140902	0.43694
Ddx60	1.3884	0	4.29077	3.74411	2.94646	0	3.36788	0	0.442047	2.92761	0.0141119	0.43694
Ipcef1	1.30705	0	1.0549	0	0	0	2.33287	3.28032	0.158777	3.03606	0.0141298	0.43694
AA386476	-1.9475	0.509354	1.39716	-0.0862538	-0.260786	-1.9475	-1.9475	-1.9475	0.207116	3.52138	0.0141867	0.43694
Gvin3	0	0	0	0	0	0	3.78063	0	0.180296	4.03701	0.0142087	0.43694
Ces1e	0.0793088	-1.51291	-2.49265	-2.99027	-2.05506	-2.84363	-1.30307	-1.60927	0.503182	2.70726	0.014236	0.43694
1700019N19Rik	-2.90919	-0.842761	-2.90919	-1.63839	-2.90919	-2.90919	-1.21264	-1.53816	0.163368	2.92253	0.0142425	0.43694
Stk31	-2.27157	-1.00673	-0.83946	0.899744	2.07821	-2.27157	-0.620565	-0.842082	0.352859	2.7864	0.0142743	0.43694
Gm4120	2.35491	0.564915	0.544226	1.74699	0.704463	1.84712	0.343925	2.49786	0.643183	2.70591	0.0142774	0.43694
H2-M10.3	0	0	3.4302	0	2.9372	3.72368	2.53341	2.01566	0.347032	2.92078	0.0142875	0.43694
Prss38	-2.91205	-2.91205	-1.85754	-1.71066	-2.91205	-1.79847	-2.03318	-1.57968	0.139012	2.84271	0.0143118	0.43694
Mki67	1.43019	-1.43514	-1.43514	-1.43514	-1.43514	-1.43514	0.259977	-1.43514	0.123493	3.1919	0.0143238	0.43694
Gm5876	0.366578	0.397967	-0.0919284	-3.04637	-1.29368	-1.81481	-2.15966	-1.02882	0.375476	2.73975	0.0143321	0.43694
Acnat2	-1.72494	-2.93124	-2.93124	-2.93124	-0.880672	-0.52775	-2.05162	-2.93124	0.176845	2.91856	0.0143453	0.43694
Gm13916	3.09641	1.39122	2.98687	1.114	2.31862	0	0	2.09721	0.237882	2.84097	0.0143599	0.43694
Kncn	0	1.26115	0	0	2.47387	0	1.36052	0	0.0932342	3.18932	0.0143792	0.43694
Nkd1	0.872954	2.17757	1.98005	1.24332	1.87072	0.853892	-2.41733	2.28509	0.889581	2.73774	0.0143923	0.43694
Myrf	-1.72965	-4.82972	-1.39382	-0.4909	-0.681116	-2.12862	-0.767632	-6.93186	2.11307	2.73752	0.0143989	0.43694
Adamtsl5	1.37089	0	0	1.27084	0	3.18041	0.879264	1.37102	0.158477	2.91564	0.0144214	0.43694
Nnmt	-1.22992	-0.628457	-3.3827	-4.4582	-3.17244	-0.742338	-1.82088	-1.52895	0.591494	2.73666	0.0144248	0.43694
1700073E17Rik	-0.486467	-3.29012	-0.620693	-0.450284	-3.29012	-1.93529	-3.29012	-0.74998	0.309428	2.8371	0.0144672	0.43694
Nab1	-2.53511	-0.19029	-1.42233	-0.902961	-3.35697	-3.41466	0.518598	-0.473247	0.91245	2.69942	0.0144779	0.43694
Gm40537	3.13666	0	0	1.20221	0	2.10059	1.13424	0	0.156086	3.02128	0.0144841	0.43694
Htr4	5.05543	2.91591	3.72014	5.63777	5.46021	4.7738	3.42795	1.34879	1.18472	2.73446	0.014491	0.43694
Zkscan7	1.8931	0.761974	-0.955778	-0.456913	-2.3023	-0.323143	0.404792	-2.3023	0.388016	2.7775	0.0145324	0.437621
Prokr1	-0.407979	-1.94337	-3.32667	-2.05904	-0.373425	-2.09506	-3.32667	0.472602	0.373714	2.77689	0.0145502	0.437621
Cmya5	-1.43419	-1.43419	-1.43419	-1.43419	-1.43419	-1.43419	-0.145966	2.11521	0.153423	3.18012	0.0145792	0.437727
Trpc6	4.46575	1.97294	2.98722	3.01475	1.29056	2.85182	2.90933	1.37328	0.476585	2.73119	0.0145903	0.437727
Zfp235	-3.04171	-3.04171	0.662515	0.325159	-1.22811	-0.0513201	-3.04171	0.46924	0.429531	2.83172	0.0146177	0.437826
Adat3	2.06673	1.82883	-1.21228	2.53653	1.03462	1.497	1.03363	0.778347	0.4228	2.72989	0.0146302	0.437826
Arhgap8	-2.10329	-2.47587	0.672343	-0.374715	-0.400478	-3.32802	-1.76741	-2.35941	0.83017	2.69296	0.0146804	0.438687
Tmem40	0	0	0	4.30839	0	0	0	0	0.223141	4.0002	0.0147119	0.438687
Gjc1	-1.20983	-1.20983	-1.20983	-1.20983	1.51123	0.0236364	-0.33092	0.855226	0.140914	2.90334	0.0147469	0.438687
Gm20655	2.70163	-1.21369	2.96033	-1.21369	3.05001	-0.1065	2.51557	-1.21369	0.563325	2.82602	0.0147788	0.438687
Pofut1	-0.703902	-1.64314	-4.04141	-1.35833	0.130527	-1.24397	-0.464481	-2.70012	0.60603	2.72466	0.0147908	0.438687
Zfp560	-2.48901	-1.0068	-1.4878	0.357762	-1.09334	-0.577686	-2.11245	-2.73528	1.36516	2.68913	0.0148016	0.438687
Asxl3	0.308278	-0.751676	1.50533	-0.382474	-3.33566	-0.8226	1.53935	1.62397	0.904658	2.72381	0.0148168	0.438687
Gm15877	0.661593	-0.361357	-0.940397	-2.83875	-2.83875	-1.05084	-0.672437	-1.32771	0.30722	3.02567	0.0148759	0.438687
Klk1b5	-2.85674	-2.85674	-0.694596	-0.581766	-1.90925	-0.791149	-2.85674	0.0559414	0.237136	2.82217	0.0148886	0.438687
Wnk4	0	2.07288	0	2.85283	1.75523	3.12429	0	0	0.212571	3.00406	0.0149088	0.438687
Vash1	0.844682	0.858174	-0.508573	1.66558	0.651596	1.366	-1.91356	-0.285498	0.863585	2.68569	0.0149116	0.438687
Spag6	-1.16978	1.40236	-2.37708	-2.37708	-0.325275	-0.0137746	-1.49576	-1.00639	0.274269	2.76455	0.0149162	0.438687
Ttk	1.30705	0	2.90457	0	0	0	2.60463	0	0.140816	3.16475	0.0149197	0.438687
Las1l	-4.70676	-0.246251	0.0511391	0.025201	-0.941806	-1.5358	0.395729	-0.985048	1.9674	2.68504	0.0149324	0.438687
Cyp11a1	0	0	0	0	2.38273	2.36113	0	3.05464	0.16976	3.16412	0.0149338	0.438687
Galntl6	1.35072	0.302767	2.0509	2.08857	0.90952	-3.3316	2.19778	0.620969	1.26687	2.71912	0.0149626	0.438996
Pm20d1	0.8705	2.00461	-0.0986802	-1.62303	1.1266	1.86064	-0.787402	-2.75032	0.713332	2.71695	0.0150307	0.439512
Sdcbp2	-1.51819	-5.03303	-0.538764	-3.13749	-5.03303	-0.911118	-0.118437	-1.17491	0.921052	2.76069	0.0150327	0.439512
LOC118567481	2.97947	0	1.35107	0	2.43637	1.68697	0	0	0.168573	2.99902	0.0150353	0.439512
9430083A17Rik	-2.09247	-1.54355	-1.11575	0.461431	-1.8078	-2.09413	-2.03091	-1.00726	0.533946	2.68032	0.0150846	0.43997
Nemp2	1.30702	0	1.42563	2.53075	3.11051	2.85234	0	0	0.236887	2.89076	0.0150877	0.43997
Fam89a	-1.09606	0.869606	0.866526	-1.09606	1.31118	2.33951	1.05894	0.237222	0.259558	2.75754	0.0151282	0.440612
Snx31	-1.93121	-1.93121	0.584976	0.958216	0.70515	2.56008	2.66622	3.57573	0.796445	2.75687	0.0151486	0.440671
Gm7587	1.81433	0	2.7017	1.20144	3.25411	0	2.10654	2.04628	0.238499	3.04864	0.0152183	0.442162
Pld1	2.52743	0	0	0	0	1.09609	2.8192	2.73891	0.190238	2.99077	0.0152452	0.442408
Saa3	0	4.68229	1.70225	0	1.36053	4.52897	0	0	0.436916	2.98902	0.0152902	0.442692
Atp10d	1.0754	-1.75072	-1.75072	0.635034	0.00198753	-1.75072	1.12362	-1.75072	0.22491	3.02876	0.015292	0.442692
Gm32249	0	2.06643	0	0	1.24043	2.56801	2.72864	0	0.169301	2.99866	0.0153165	0.442866
1110032A03Rik	-3.06858	-1.70353	0.49132	-3.06858	-1.25629	-0.792948	-0.768847	-1.73497	0.309784	2.74928	0.015382	0.444222
Prokr2	0	0	0	1.19887	0	0	3.36863	1.37024	0.144759	3.14339	0.015407	0.444257
Gm39323	0.81471	-2.72421	-0.7482	-4.0042	-0.94694	-0.562112	-1.32181	0.460993	0.754629	2.70429	0.0154332	0.444257
D130007C19Rik	2.43286	2.72169	1.61067	2.70839	4.03572	1.10203	1.21905	3.17708	0.408017	2.70372	0.0154517	0.444257
Eln	2.41605	1.26292	1.96188	0	1.44998	0	2.79669	3.08149	0.233653	2.80041	0.0155258	0.444257
Ndst3	3.60021	0.985997	4.33717	1.41917	3.89628	2.30144	2.82189	3.54135	1.56217	2.66672	0.0155325	0.444257
Large2	0	0	1.42873	0	0	0	2.59549	0	0.0903348	3.40324	0.0155515	0.444257
Crlf1	0.0395567	2.03749	-1.34897	-1.34897	-1.34897	1.45257	-1.34897	-1.34897	0.206741	2.97893	0.0155518	0.444257
Zfp934	-0.113375	-1.42022	0.415823	2.8971	1.18083	0.421641	1.44514	-0.0473635	0.398736	2.70053	0.0155549	0.444257
Grip2	-0.134494	0.307243	0.274044	2.71953	-0.996133	1.31003	0.155064	-2.26084	1.21721	2.66562	0.0155692	0.444257
Klk1	-4.26806	-4.26806	-0.843935	-0.33237	-2.44311	-1.44244	-3.00608	-0.929754	0.532944	2.74326	0.0155696	0.444257
Adnp2	0.651078	-1.38256	0.0062117	-2.75506	0.494346	-0.242146	-1.49099	-4.03831	0.800065	2.69953	0.0155873	0.444257
Erbb3	-2.73897	-2.73897	-1.68341	-2.73897	-1.42404	-0.181467	-0.248933	-2.73897	0.193374	2.87002	0.0156672	0.446004
Cdh9	-1.90015	-0.510545	-0.555371	0.381271	-0.0877877	2.24245	0.862395	1.6276	0.421465	2.69241	0.0158207	0.449838
Gm41442	1.26973	0	0	0	0	0	4.02129	1.3711	0.180226	3.12454	0.015851	0.45016
Cenpl	0.288498	-0.530125	-3.89018	-1.30091	1.39258	-1.45371	-0.532715	-0.468987	0.826653	2.69094	0.0158696	0.45016
Nod2	-3.058	-3.058	-1.63042	-3.058	-1.75185	-1.96248	-3.058	-3.058	0.139682	2.96542	0.0159095	0.450192
Zcchc7	-0.721198	-1.69335	-1.53812	-1.52995	-1.48599	-1.70517	0.385755	-1.38242	4.15234	2.6547	0.015939	0.450192
Il18	3.04112	0.0470325	-1.34312	-1.34312	2.43618	-0.0688874	0.645805	0.0294637	0.384621	2.7316	0.01594	0.450192
Prr19	1.53975	-1.75012	-0.313498	-1.75012	-0.803664	-1.75012	-1.75012	0.473353	0.182606	2.86032	0.015946	0.450192
Dhx35	-2.35689	-2.13831	-0.230475	0.93706	-0.796717	-1.61939	-0.210183	-2.44552	1.39233	2.65213	0.0160274	0.451337
Malt1	0.976404	1.78987	1.75384	1.17773	2.74909	3.16334	-0.211919	0.266217	0.487627	2.65167	0.0160431	0.451337
Tex15	-0.563363	1.71605	-1.87039	0.743122	-1.87039	-1.87039	-0.98971	0.144871	0.235114	2.78279	0.0160621	0.451337
Hhat	1.30704	0	1.05552	1.77185	2.23077	3.39326	0	0	0.191595	2.85633	0.0160622	0.451337
Gm5640	-3.27309	-3.27309	-3.27309	-2.15963	-1.96769	-1.60041	-1.90988	-1.84278	0.180356	2.78218	0.0160808	0.451337
Pitx1	0	0	2.64103	0	2.05305	0	0.878159	0	0.106165	3.11422	0.0161	0.451347
Vmn2r88	0	0	0	1.20136	2.83875	0	0	0	0.101113	3.37352	0.0161532	0.451671
Clic5	0.283065	-1.53164	1.8071	2.07287	1.45126	-0.325245	1.33331	1.00712	0.926029	2.6482	0.0161633	0.451671
Racgap1	-1.7505	1.30331	-0.694667	-0.551576	-0.43587	-1.7505	-1.7505	1.24759	0.209223	2.77898	0.0161803	0.451671
Ranbp17	1.63181	-2.28632	-2.28632	3.05933	1.58991	1.01704	1.09173	2.28161	0.869229	2.72387	0.0161902	0.451671
Slc2a9	-3.25127	-3.27513	0.285362	-2.833	-1.10058	0.367366	-0.410559	-2.42898	0.864795	2.64698	0.0162059	0.451671
C1qtnf6	0.566263	-3.15057	0.215693	-3.15057	0.589108	-3.15057	-0.998895	1.35701	0.560288	2.77627	0.0162653	0.452669
Hgf	2.08481	3.12645	1.05557	1.54231	1.09133	-1.21342	0.515887	2.89347	0.525897	2.67873	0.0162795	0.452669
Drp2	-4.28362	0.792699	-2.79348	0.396421	-1.8755	-0.718497	0.379282	-0.15085	1.73232	2.64295	0.0163467	0.453751
A930038B10Rik	0	0	1.83221	0	3.24992	0	0	1.33236	0.13899	3.10377	0.0163563	0.453751
Tacr1	-1.35156	-2.55991	-1.50124	-0.71703	-0.0799726	-0.194467	1.49256	-1.22578	0.349275	2.67577	0.0163802	0.453888
2010315B03Rik	-1.87425	-0.469348	-3.09087	-1.31348	0.461973	1.04772	0.463216	-3.09087	0.515673	2.71685	0.0164208	0.454384
H1f3	1.30701	3.33891	0	2.18711	1.744	0	1.36527	3.27148	0.259726	2.77049	0.0164473	0.454384
Tead3	0.120527	-1.27696	-1.27696	-1.27696	0.773989	1.86235	0.427239	-1.27696	0.186719	2.84294	0.0164587	0.454384
1700020L24Rik	0	2.06644	2.23689	0	0	3.04728	2.78926	0	0.208946	2.94468	0.0164753	0.454384
Gm32815	1.37112	1.36496	0	0	0.945459	2.93519	0.878792	0	0.135368	3.39705	0.0164987	0.454384
Hlcs	3.52745	0	3.90527	5.11531	3.51713	1.11222	3.8803	3.70436	0.764507	2.71411	0.016512	0.454384
Gstt1	-1.10014	0.461043	-1.43263	-0.439195	-0.126423	-3.05442	0.963451	0.695238	0.529084	2.66937	0.0166009	0.456306
Calca	-2.1228	-4.60373	-2.60209	-0.874458	-1.67005	-0.336419	-1.54176	-2.16965	0.678444	2.6685	0.0166311	0.456611
Slc6a3	2.11884	2.17563	3.23346	1.11477	2.05638	3.60172	0	2.49592	0.332216	2.70711	0.0167464	0.457869
Epsti1	0.175774	-1.09357	-1.09357	-1.09357	1.53964	-1.09357	-1.09357	-1.09357	0.0973415	3.66852	0.0167485	0.457869
Gm11009	-0.58381	-0.717925	-2.70529	-1.59209	-2.70529	-2.70529	-2.70529	-1.5309	0.156077	2.85996	0.0167577	0.457869
Smpd4	-3.89403	-1.71902	-0.835732	-2.22582	-1.25089	-2.96437	-2.70791	-4.07976	2.28612	2.63112	0.0167678	0.457869
Tbc1d31	3.54127	2.87735	0.196626	0.797933	3.02919	0.176333	2.25456	0.981427	1.00553	2.63099	0.0167725	0.457869
Chst3	2.08532	0	3.45203	2.56976	2.6576	3.56943	3.98251	0	0.462028	2.75767	0.0168591	0.459028
Gm38396	0	0	2.90462	1.11287	0	0	0	2.4677	0.125598	3.08311	0.0168759	0.459028
Hbb-bh1	-3.46706	-1.39416	-2.1161	-1.62664	-3.46706	-3.46706	-3.46706	-3.46706	0.180172	2.9303	0.0168799	0.459028
Gm35835	-1.43394	-1.43394	-1.43394	-1.43394	1.40774	-1.43394	-0.0712685	1.12414	0.161569	2.92989	0.0168917	0.459028
Gm35468	0	0	0	0	0	0	0.878261	3.32666	0.110726	3.33741	0.0169186	0.459237
Polm	-0.592492	-0.515793	0.341762	-0.784459	2.45699	0.783482	-1.01683	-0.528535	0.346296	2.62641	0.0169385	0.459257
Fcer2a	0	0	2.94299	0	0	0	0	2.49593	0.123022	3.33445	0.016983	0.459353
Fam162b	0.67715	0.108437	2.08653	0.502001	1.61394	0.813525	2.89952	0.0979917	0.41283	2.62488	0.0169943	0.459353
Papss2	0.0410674	-0.488754	0.976934	-0.493714	1.04888	-1.68051	1.4773	1.28777	1.49893	2.62474	0.0169996	0.459353
Gvin-ps1	0	0	0	0	0.943865	0	2.29254	0	0.0688807	3.55585	0.0170273	0.459584
Xlr4c	-1.84677	-0.617616	-1.63849	-0.31495	-0.876593	-3.49501	-0.517416	-3.19904	0.797667	2.62339	0.0170488	0.459647
Scnn1a	2.80679	0	0	0	0	1.11309	0	0	0.0931744	3.32791	0.0171264	0.461219
Cnga3	0.897522	-1.53102	1.09474	2.98304	1.99162	1.83964	-1.59517	2.47865	1.1846	2.6192	0.0172033	0.462706
Epha10	3.15329	-0.0130773	2.55372	3.05793	1.85448	2.57602	0.755865	-1.39431	0.717814	2.65183	0.0172203	0.462706
Plekhb1	-1.58761	-1.88824	-1.51309	-1.83585	-1.53683	-0.645993	-0.578199	-1.32049	5.98373	2.61579	0.0173298	0.465125
Zfp618	-0.202147	-2.06636	-6.15019	-1.32267	-1.41573	-0.289572	0.375054	-5.98461	3.38436	2.61184	0.0174774	0.468318
Tirap	1.36314	4.0157	3.81472	0	2.98844	1.12159	1.77708	4.20723	0.481645	2.68526	0.0175012	0.468318
Rem2	0	0	2.64052	1.90575	0	0	0	0	0.0945001	3.31083	0.0175074	0.468318
Gmnc	-1.7495	-0.48767	-1.7495	-0.445228	-1.7495	-0.635886	0.984674	-1.7495	0.141949	2.80766	0.0175516	0.468977
Tbc1d32	2.17308	3.76719	0.671051	2.30766	2.13599	0.760436	0.853534	1.58119	0.678201	2.60714	0.0176551	0.470099
Itm2c	-0.196374	-0.105469	-0.390035	-0.0712339	0.110676	0.000924763	-0.563026	-0.599947	6.67586	2.6068	0.0176679	0.470099
Fam78a	3.31583	2.30014	0	3.51937	1.7527	2.71896	0	0	0.320595	2.80311	0.017698	0.470099
Myl2	0.0597192	0.155233	1.43167	-1.20971	-0.264728	-1.20971	-1.20971	-1.20971	0.114476	2.80098	0.0177671	0.470099
Gm34678	0	0	0	1.11222	0	0	2.29266	0	0.0719768	3.29934	0.0177688	0.470099
S100b	-0.550258	-0.128596	0.17304	-0.0669114	0.165052	0.755992	0.368076	0.0401428	4.82424	2.604	0.0177747	0.470099
Mndal	0	1.98829	2.21739	0	3.42696	4.0563	0.881661	0	0.296664	2.80009	0.0177958	0.470099
Gm38528	1.93863	1.63708	0.0814387	-0.637236	-0.44888	-1.75198	0.205211	-0.32218	0.328299	2.63598	0.0178003	0.470099
Abcc4	3.19906	4.36693	0	3.4975	1.47	2.37788	2.30574	1.37361	0.448051	2.67673	0.017805	0.470099
Slfn5	-1.39271	-1.02998	1.15317	0.623537	-2.14355	-1.59858	-1.82904	-3.03591	1.31284	2.60237	0.0178371	0.470099
Tmem190	-1.09544	0.340847	0.501147	-1.09544	1.48043	0.0188365	2.33007	-1.09544	0.213775	2.72811	0.0178494	0.470099
Mrvi1	0	0	2.94261	0	1.24093	1.35924	0	0	0.114078	3.04584	0.0178579	0.470099
Gucy2f	0.78653	-2.04381	-2.04381	-2.04381	-2.04381	-0.930376	-2.04381	-2.04381	0.124686	3.04573	0.0178611	0.470099
Ly6c2	0	1.39152	0	0	0	1.23351	0	3.32473	0.132467	3.04545	0.0178685	0.470099
Niban3	0	2.92794	5.68412	5.32826	4.30592	4.16381	3.95814	1.585	1.05015	2.67427	0.0178934	0.470237
Inca1	0	0	0	0	0	0	2.88505	0	0.0914286	3.79497	0.0179213	0.470422
Kcns1	0	0	1.35132	0	2.42159	1.82754	2.33224	0	0.144166	2.89389	0.0179514	0.470422
Ddx4	-3.02759	1.19712	0.569022	-3.02759	-0.936512	-1.79921	0.990703	0.553005	0.566907	2.67245	0.0179594	0.470422
Sipa1l3	1.87203	2.16891	0.781456	-0.593779	0.791897	1.12034	1.97282	0.145091	2.37693	2.59831	0.0179932	0.470792
Adap2	-1.34793	2.07501	-1.34793	0.422518	1.58545	-1.34793	1.63517	0.0819935	0.28797	2.72291	0.0180293	0.471221
Hacd4	-3.40715	-0.839068	0.0435063	-1.47818	-2.27298	-3.07884	-0.42234	-4.77788	0.794956	2.62878	0.0180698	0.471766
Arid3a	1.68627	0.864887	1.38351	-1.10939	3.22981	2.72436	-0.2115	2.74417	0.52813	2.62818	0.0180926	0.471766
Zfp862-ps	1.59084	0.225685	-1.21026	0.816217	-1.21026	1.34832	1.90716	-1.21026	0.256206	2.72062	0.0181092	0.471766
Glis1	-1.75051	-0.366585	0.0822069	0.246129	-0.44562	-1.75051	-1.75051	1.64848	0.209553	2.71996	0.0181325	0.47186
Met	-3.89525	0.173736	-3.89525	-2.18802	-2.15065	-2.55046	-1.36001	-2.46708	0.405868	2.66714	0.0181527	0.47187
Gm35232	0	0	0	2.15768	0	0	0	2.48573	0.0961516	3.28173	0.0181777	0.472009
Gm30341	0.209949	2.31391	1.77528	2.09573	-1.09704	0.691003	1.63091	0.33272	0.341396	2.62524	0.0182042	0.472185
Gm16759	2.78219	1.88088	2.69405	0	0	0	2.70101	0	0.200658	2.88384	0.0182596	0.472592
Vsig10l	1.39623	1.96594	3.66736	3.11342	1.99622	0	2.1162	1.3335	0.293107	2.6636	0.0182828	0.472592
LOC115486423	0	1.39152	1.05434	3.35597	0	0	0	0	0.130828	3.02886	0.0183255	0.472592
Cntrob	-3.28142	-0.392662	-0.484617	-0.89106	-0.567744	-1.19481	-0.165585	-0.928592	2.77596	2.58936	0.018343	0.472592
Mboat4	0	2.75259	0	1.698	0	0	1.36107	0	0.109747	3.02801	0.0183492	0.472592
4930503L19Rik	1.29494	0.180906	-1.21026	-1.21026	0.029459	1.81547	0.0753233	1.90822	0.258649	2.66179	0.0183499	0.472592
Cckbr	3.99028	-1.2163	3.08787	2.42875	2.21506	3.63176	2.34766	3.21778	0.986205	2.62059	0.0183819	0.472592
P2ry2	0	0	0	0	0	0	3.0845	1.33209	0.108031	3.27282	0.0183884	0.472592
Adgrg6	-3.95169	-3.95169	-3.95169	-3.95169	-2.71217	-2.67383	-0.213724	-3.95169	0.287486	2.87893	0.0184123	0.472592
Drd2	2.5551	2.5236	2.50464	4.71122	3.9753	3.298	3.95961	2.05404	0.671151	2.61967	0.0184173	0.472592
Rspo1	3.88437	3.84282	3.12586	3.21506	2.47442	1.80566	2.26895	2.06825	0.497821	2.61914	0.0184375	0.472604
Zfp991	-3.62649	-4.41293	-3.96592	1.1023	0.924366	0.86997	0.149715	0.625782	2.8458	2.5864	0.01846	0.472675
Wdr81	1.03441	1.71673	0.649337	-1.88498	0.573591	0.949514	1.38883	-3.74077	1.21926	2.61754	0.0184995	0.473042
Zfp11	1.08986	1.01806	1.74041	2.37702	1.23958	0.889042	-1.27639	-1.27639	0.341258	2.65713	0.0185232	0.473042
Taf4b	3.2662	0	3.69303	2.76223	0	1.94095	2.86033	2.65002	0.369393	2.70843	0.0185412	0.473042
Lpcat2	-2.44126	0.735717	-1.16674	-3.665	0.480582	-0.140852	0.892889	0.474062	0.804142	2.61599	0.0185594	0.473042
Nphp4	-4.79268	-2.0672	-4.77872	-2.36289	-0.313123	-0.96541	-2.54945	-1.69572	1.41114	2.58317	0.0185886	0.473042
Serpina3f	-4.58069	-4.58069	-0.782767	-0.26783	-1.15608	-1.56598	-4.58069	-0.85052	0.677851	2.70672	0.0186026	0.473042
Npb	-1.20997	0.181421	-1.20997	0.695314	-1.20997	2.09698	-1.20997	0.220355	0.175562	2.77552	0.0186126	0.473042
Col8a2	1.98153	2.42071	1.0573	3.35914	2.12527	0	3.3686	0	0.299869	2.70533	0.0186523	0.473228
Tex14	2.88818	1.26167	0	0	1.44692	1.37098	0	0	0.130066	2.87073	0.0186698	0.473228
Bche	-2.76409	-0.779208	0.73752	-0.247573	-1.45807	0.179055	0.718511	-2.76409	0.39212	2.65297	0.0186793	0.473228
Actn2	-1.7519	-0.931915	-1.09753	0.042861	-2.26152	-2.62896	-2.34795	-0.213996	0.467912	2.57982	0.0187228	0.473829
Pls1	1.03774	-2.1692	-2.1692	-2.1692	-2.1692	0.312476	0.56905	-2.1692	0.239785	2.86621	0.0188134	0.47562
Evpl	3.51239	4.1797	1.07108	1.29263	2.73416	3.14758	3.25208	0	0.48477	2.64666	0.0189191	0.477533
Slc8a3	-1.25925	-0.699944	0.250838	0.55555	-0.39672	-2.28115	-0.890518	-4.00082	2.29083	2.57432	0.0189455	0.477533
Myo15b	0	1.9806	0	2.45557	0	1.67146	0	0	0.113444	3.00579	0.0189813	0.477533
Myo15	0	0	0	0	0	0	0	4.30705	0.195779	3.73566	0.0189932	0.477533
Phtf1os	-0.213912	-2.62393	-2.62393	0.402492	-1.31026	-2.62393	-0.540315	-0.127926	0.264945	2.69553	0.0190094	0.477533
Gm7099	-2.07522	-2.20079	-3.46358	-2.26215	-3.46358	-1.54942	-1.19083	-3.46358	0.221565	2.69478	0.0190368	0.477533
Grhl2	0	0	1.35184	0	0	0	2.73198	0	0.0967247	3.24609	0.0190371	0.477533
LOC115489710	0	0	0	1.11241	0	0	2.61278	0	0.08712	3.24526	0.0190577	0.477533
Slc16a4	2.96686	1.26381	3.53659	0	0	3.03794	3.23109	0	0.322842	2.76228	0.0190686	0.477533
Tcf3	-2.17733	1.04717	-4.31245	0.491342	-1.06126	-0.183491	0.153261	-1.25434	2.30793	2.57048	0.0191026	0.477885
Gm33938	0.853918	-1.09577	0.802653	0.0182252	2.24815	0.981978	0.699108	-1.09577	0.237642	2.64004	0.0191734	0.478244
Slc19a1	0.759137	-0.780501	0.48592	-0.863613	0.614638	-0.512751	-1.39269	-5.82145	2.0443	2.60033	0.0191767	0.478244
Gm11419	-2.45942	0.650337	1.91036	1.23456	3.59568	1.64897	0.774882	1.92168	1.95696	2.56868	0.0191769	0.478244
Gm46194	-0.0367852	-0.0420874	1.0174	-0.23458	0.49699	1.84493	1.68424	-2.51907	0.604613	2.59958	0.019207	0.478496
Col14a1	-1.34867	2.25511	0.792881	-0.0784037	-0.401319	-0.234255	-0.215499	0.0225947	0.229113	2.59886	0.0192359	0.478719
Syndig1l	-2.1662	-3.38323	-0.690502	0.830324	-0.898334	-0.595511	0.63479	-3.38323	0.531548	2.63763	0.0192671	0.478864
Tcp10c	0	0	0	0	0.944172	1.09476	2.3293	0	0.0809098	2.99551	0.0192818	0.478864
Cyp27a1	0.200735	2.45661	2.05854	2.07029	1.26233	0.123829	0.277909	2.86132	0.450488	2.56144	0.0194773	0.48322
Gm52428	0	1.36496	0	1.20139	1.75271	3.01336	0	0	0.141983	3.43407	0.0195531	0.483643
Sytl2	-1.31956	2.38637	4.33824	2.619	4.27771	3.00641	3.57431	0.8735	1.13136	2.59059	0.0195712	0.483643
Rhbdf2	0.111445	0.994682	0.80377	-1.09475	-1.09475	-1.09475	1.92121	-1.09475	0.167068	2.74773	0.019583	0.483643
A630001G21Rik	1.39815	1.26178	1.05449	2.89501	0	0	1.27538	0	0.138555	2.7472	0.019602	0.483643
Arhgap9	2.32037	0.712117	0.688141	-1.2764	-1.2764	2.47835	0.102523	0.0944685	0.337932	2.62849	0.0196259	0.483643
Gch1	-0.650468	-1.36367	-2.62736	1.13963	-0.83265	-0.785244	-0.641874	-1.29375	0.309853	2.58886	0.0196423	0.483643
Wnt16	-1.09444	-1.09444	0.342963	-1.09444	-0.148709	2.23526	-0.215392	-1.09444	0.147903	4.02664	0.0196511	0.483643
Lrrc3b	0.0224636	-1.33798	0.485516	0.441954	-2.54378	-0.36595	-0.00662642	-0.275354	2.55273	2.5572	0.019656	0.483643
C230057M02Rik	-5.9026	-1.32761	1.77256	-0.33686	-0.942332	0.470322	0.495827	-4.48673	2.21524	2.58727	0.0197075	0.484413
Shpk	-2.94188	-0.576723	-1.88517	-2.94188	-0.888312	0.0212618	-1.80883	-0.894881	0.261799	2.62448	0.0197857	0.485539
Gm45972	2.26368	0	0	0	0.944675	0	2.17299	0	0.101419	3.3764	0.019827	0.485539
Nrros	-2.32765	1.20003	1.62906	-1.02564	-2.32765	-1.09497	-0.178773	-2.32765	0.33115	2.67358	0.0198336	0.485539
Gm34857	0	1.39156	2.61424	0	0	1.11336	1.79776	0	0.117947	2.83508	0.0198345	0.485539
Gm2007	0	3.42268	1.05407	0	0	0	0	0	0.11843	3.21224	0.0198947	0.486515
Hvcn1	-2.59345	-2.59345	1.30367	1.60115	1.51211	-0.372935	1.3776	0.425922	0.660546	2.62003	0.0199643	0.487605
Depp1	-0.455311	-2.42438	-2.42438	0.526729	-0.365672	-1.30918	-0.0853009	1.36574	0.333103	2.61964	0.01998	0.487605
Ces1d	-1.09933	-2.76054	-1.80793	-1.88269	-0.311381	-1.31867	-2.64363	-1.35967	1.55993	2.54729	0.0200789	0.489185
Otx2	0.17145	0.175076	1.05618	-0.0138406	0.13822	2.5142	3.29599	2.99382	0.534305	2.54714	0.0200856	0.489185
Gm34169	0.104992	-2.32353	-1.91245	-2.55188	-0.398767	-0.816105	-1.87297	-0.370511	0.52335	2.54627	0.020123	0.489598
Gm15624	0	0	1.35142	0	1.31895	3.12384	0	0	0.134712	2.96597	0.0201728	0.490038
Chrna9	1.26982	3.18758	0	0	2.62926	1.11418	2.16032	0	0.202072	2.73128	0.020182	0.490038
Gapdh-ps14	-3.55004	-3.48129	-3.33437	-1.97499	-2.07393	-3.08039	-1.84019	-2.29136	1.18153	2.54331	0.0202514	0.491225
Myh7b	-1.75083	-2.92241	0.318796	0.317915	0.6931	0.909841	-2.65797	-2.91876	1.06917	2.54242	0.0202903	0.49167
Ifitm5	1.95048	3.35788	1.96869	1.77187	3.3423	2.5827	0.88476	2.92749	0.360525	3.19906	0.0203974	0.493767
Ehf	1.30707	0	0	0	0	0	2.73203	0	0.097666	3.18905	0.0205065	0.493777
Stk33	-2.59129	-5.00481	0.606163	0.267639	-0.674666	-2.61632	0.693777	0.021343	1.40074	2.56819	0.0205094	0.493777
Plekho2	-1.17083	0.947362	0.722868	1.57558	1.2001	1.61596	0.737786	-0.359807	2.06139	2.53704	0.020526	0.493777
Slc12a1	0	0	0	0	0	0	5.37868	0	0.339188	3.65659	0.0205385	0.493777
Calhm2	-0.305095	-3.16899	-2.11153	-1.96999	-1.04678	-3.16899	-0.222858	-0.561671	0.31095	3.24879	0.0205574	0.493777
Gm5342	-2.73228	-4.11957	-3.06182	-0.779031	-2.06229	-4.11957	-2.41619	-2.74871	0.331536	2.60548	0.0205596	0.493777
Wipf3	3.15199	0.35522	-0.462705	1.06319	1.69776	0.885433	2.10825	-0.528279	0.675431	2.53577	0.0205822	0.493777
Npnt	1.56058	-1.28934	-3.41085	1.35863	-2.18676	-0.250398	1.23803	0.470933	0.915322	2.56602	0.0206027	0.493777
Sst	1.04206	1.23047	0.812736	0.350282	0.458836	-0.0235181	0.289166	0.8131	5.93019	2.53529	0.0206036	0.493777
Fastkd5	0.980656	-2.37362	-0.529884	1.85425	2.20764	2.81991	1.77512	-0.344536	0.846492	2.56571	0.0206158	0.493777
Vars2	-0.343365	1.24614	1.2452	0.417164	0.4081	1.08169	-0.341099	-4.57936	1.58664	2.56517	0.0206393	0.493777
Kcnj13	-2.72436	-1.84034	-5.19709	-0.626801	-2.40194	-2.11717	-0.889085	-3.09988	0.808346	2.56503	0.0206454	0.493777
Mdh1b	0.194467	0.479379	-0.841798	-0.706102	-1.0157	-3.48526	-0.74041	-2.11093	0.521055	2.56453	0.0206668	0.493796
Pdgfd	3.7765	4.5053	3.55195	2.62047	3.57545	1.26704	1.3939	2.9869	0.591542	2.56356	0.020709	0.49431
Gm773	-0.903319	-3.78764	-0.155615	-1.11827	-0.365054	-5.20638	-1.12629	-5.20638	1.07282	2.60075	0.0207572	0.494968
Zfp663	0	1.38414	2.66554	0	0.944655	1.11317	0	0	0.100574	3.34909	0.0208892	0.497255
Mphosph9	1.27833	-3.71311	2.37619	1.12852	2.91445	2.14482	1.43518	0.74313	1.79188	2.55929	0.0208946	0.497255
Uhrf1	-3.99534	-3.99534	-2.57697	-0.116839	-1.079	-0.193011	-2.78105	-3.99534	0.479319	2.64488	0.0209666	0.498473
Notum	2.77664	0	4.39568	0	2.26604	1.27744	3.09651	0	0.337027	2.70932	0.0210105	0.498765
Itga8	1.66311	2.68407	-0.118868	-2.41259	1.11822	0.659493	1.12476	2.17642	0.835031	2.55598	0.0210396	0.498765
Galp	-1.30497	-1.75337	-3.11836	-3.11836	-3.11836	-1.44571	-1.985	-1.78566	0.178508	2.92338	0.0210414	0.498765
Birc5	0	2.29233	1.96146	0	1.24002	2.97441	2.72475	0	0.219215	2.70734	0.0210871	0.499218
Abi3bp	8.11026	5.90408	5.06769	7.32006	7.0572	8.45982	4.72246	6.77223	3.17651	2.55456	0.0211022	0.499218
Pfkfb1	-4.00226	-4.00226	-1.52275	-0.633957	-2.70763	-0.730064	-2.74234	-2.49893	0.417286	2.5918	0.0211358	0.499519
Zfp936	-1.39326	-2.29067	-3.40839	-1.90949	-1.53351	-4.74905	-2.64785	-2.19566	0.550095	2.55294	0.0211736	0.499918
Nipa1	2.33629	1.78178	0.328278	-1.09644	1.34304	0.920287	0.776547	-1.09644	0.289731	2.59023	0.0212032	0.500123
Pcp2	-4.11017	1.53748	-0.69093	-0.885787	-4.204	0.0929256	-1.76476	1.12565	1.80877	2.52137	0.0212291	0.500243
Fgfr4	0	0	0	0	1.78905	3.22408	0.87877	0	0.134337	2.93198	0.0212526	0.500303
Gm2824	1.95003	1.39054	2.85429	0	4.41383	1.67763	0.885272	3.10571	0.364267	2.58798	0.0212998	0.500566
Tlr7	1.9771	0	1.05547	1.30362	0.946583	0	3.42568	1.43027	0.188897	2.83466	0.0213056	0.500566
Spata5l1	-1.85411	-1.7699	-3.16113	-3.16113	-0.684067	-0.536437	-3.16113	-1.79057	0.23298	2.63551	0.0213509	0.501138
Plp1	-1.31026	-1.55493	-0.874467	-1.03189	-1.15026	-0.921646	0.0035185	-0.407662	7.60838	2.51786	0.02139	0.501566
Acsm3	-1.71121	-1.70682	0.124786	1.46746	0.39997	0.586658	-1.83532	-3.09515	0.57337	2.54598	0.021484	0.502118
Sntg2	-2.10381	1.31718	-2.44764	-0.0972227	0.669051	-0.701265	-1.02141	-0.817846	1.18089	2.51546	0.0215003	0.502118
Gcfc2	2.9512	2.67951	1.85743	-0.56697	0.470962	0.682812	2.70219	3.64668	0.963254	2.51516	0.0215144	0.502118
1700016K19Rik	0.527233	-1.23509	-1.49122	0.629654	-0.703824	1.15892	1.16945	-0.756019	1.21712	2.51461	0.0215397	0.502118
Wdr38	1.90305	-1.33753	3.20421	-0.0736902	0.481733	1.04232	2.48888	0.760033	0.473142	2.54427	0.0215609	0.502118
Nr4a1	3.03126	1.62617	3.04686	-1.54023	0.697387	3.31998	1.49424	1.34401	1.90026	2.51411	0.0215628	0.502118
Itprip	2.12001	0	0	0	3.01079	2.97504	2.61972	0	0.24652	2.78556	0.0215794	0.502118
Tnfrsf1b	-1.27665	0.806131	1.95988	-1.27665	-0.328666	1.90435	1.06025	0.094013	0.26525	2.58148	0.0215814	0.502118
Dpp8	-0.699662	0.0869631	-0.512631	-0.36274	-0.775274	-1.19881	0.248781	0.0332766	3.8834	2.51325	0.0216029	0.502131
Gckr	-0.0801034	-1.34973	-1.34973	-1.34973	-1.34973	-1.34973	-1.34973	2.49094	0.155025	2.91791	0.0217175	0.504142
Slc22a2	1.37032	2.37893	0	2.63634	2.96096	1.36855	0	1.37053	0.222567	2.62631	0.0217346	0.504142
Vwa1	-3.0553	-3.0553	-3.0553	-1.75077	-3.0553	-3.0553	-1.77953	-3.0553	0.1238	2.91676	0.0217561	0.504142
Pik3cg	-2.14731	-2.28311	-2.194	-3.54516	-3.54516	-3.54516	-3.54516	-3.54516	0.159424	2.7803	0.0217736	0.504142
Csmd3	-1.86324	-2.61877	-1.4571	-0.671894	-2.48353	-0.0365527	-0.143467	-1.01701	2.20111	2.50708	0.0218911	0.506129
Adgre1	-3.04517	-3.04517	-1.98849	0.179185	-3.04517	-3.04517	0.152453	-3.04517	0.259659	2.77686	0.0219017	0.506129
Sla	0.310616	-1.66581	1.18478	-1.66581	0.786142	2.35656	1.19313	-0.236917	0.373914	2.57319	0.0219461	0.506232
Sned1	-2.78068	-2.06032	-1.21714	-2.1949	-4.05392	-0.131289	-0.929008	-2.62696	0.485351	2.53497	0.0219841	0.506232
Adamts17	-1.20997	-1.20997	-1.20997	-1.20997	1.42768	0.0233186	1.27425	0.961443	0.17681	2.68434	0.0219957	0.506232
Dok1	-1.27642	0.796395	-1.27642	2.06803	2.03355	-1.27642	1.92943	0.153369	0.332745	2.62	0.0220022	0.506232
Gm8174	-2.25895	-4.97076	-1.52325	-0.575793	-1.22244	-1.95171	-1.38467	-1.52666	0.798307	2.53436	0.0220119	0.506232
Gm35931	1.2702	1.96604	1.05738	2.79038	3.02871	2.8688	2.8271	0	0.305509	2.56858	0.0221517	0.508957
Cox7a1	1.22872	1.33354	-1.20998	-1.20998	0.108033	-1.20998	-1.20998	1.37051	0.179309	3.16648	0.0221778	0.509068
Tsks	-4.19679	0.329673	-0.410129	0.0136379	-2.97437	1.47831	-1.07535	-0.399124	1.02386	2.53007	0.0222106	0.509332
Adamts5	-0.480263	-1.74996	-1.74996	-1.74996	1.45179	-1.74996	0.0182103	-0.417321	0.17165	2.6781	0.022249	0.509517
1300002E11Rik	2.29821	2.05076	0	2.33419	2.67761	2.14814	4.14884	2.01786	0.380891	2.56604	0.0222656	0.509517
LOC118567627	0	0	1.05508	1.2014	2.05722	1.80176	3.08337	0	0.168334	2.96629	0.0222825	0.509517
Slc26a1	-3.44479	-1.27908	-0.121333	-0.428391	-0.93759	-3.44479	0.731517	-3.44479	0.496006	2.61197	0.0223471	0.509644
Gm20942	0.664371	-1.75177	-1.75177	1.51797	0.994762	1.29437	-0.385361	-0.380978	0.309665	2.90074	0.0223509	0.509644
Rps15a-ps3	-1.7213	-1.86479	-2.18832	-1.55919	-0.857876	-1.86371	-1.14314	-1.6638	2.20943	2.49738	0.0223519	0.509644
Dqx1	0	0	1.42595	0	2.26214	1.0964	4.43514	0	0.219788	2.76416	0.0223817	0.509839
Ap1m2	-1.0506	-2.12631	-1.05528	-3.51735	-1.46221	-3.51735	-0.397941	-3.51735	0.312624	2.60974	0.0224439	0.509949
Rab42	-3.57326	-2.31085	-3.57326	-1.74151	-3.57326	-3.57326	-2.34498	-1.5584	0.188258	2.67245	0.0224812	0.509949
Ggps1	-1.33657	-1.70125	-1.77473	-2.15469	-0.939969	-1.67553	-1.34324	-1.29141	4.01864	2.49417	0.0225064	0.509949
Stk36	-1.46232	0.118579	1.32259	-1.48002	-1.44818	0.498701	1.67408	0.0753886	0.545495	2.49291	0.0225675	0.509949
Cd1d1	-2.55448	-0.262849	-2.55448	-1.2508	-2.55448	-2.55448	0.289077	-2.55448	0.184597	2.75912	0.0225755	0.509949
Pitx2	-3.04098	-3.19842	-0.516797	-0.123419	-1.59937	-1.15997	-0.407304	-3.69623	2.53917	2.49258	0.0225835	0.509949
Proser2	1.40968	0.914391	1.91824	-0.637629	-0.514682	-1.75322	-0.8695	1.57448	0.35327	2.52197	0.0225898	0.509949
Gm8984	-3.50397	-4.09355	-2.89139	-2.37344	-2.27894	-2.06475	-1.58099	-2.01557	1.18146	2.49213	0.0226053	0.509949
Ccdc110	1.01247	-1.84197	-1.84197	-1.84197	-1.84197	-1.84197	0.410797	-1.84197	0.14365	2.89118	0.0226306	0.509949
Gm30827	0	0	0	1.84459	2.78614	0	1.22948	0	0.120708	2.8898	0.0226786	0.509949
Tmem150b	-1.09912	2.28209	1.3796	1.53478	0.201345	2.58491	1.09187	0.272947	0.361641	2.52001	0.0226825	0.509949
Gimap4	0	1.26162	0	0	3.2647	0	1.22936	0	0.126712	2.8894	0.0226926	0.509949
Creb3l4	0	0	0	0	0	0	3.19153	0	0.116879	3.55655	0.0227041	0.509949
Otx1	1.39104	2.05093	2.16927	3.10244	1.30547	3.53204	3.80746	0	0.39726	2.55583	0.02273	0.509949
Rab43	0.985118	0.912432	1.09589	-2.02411	0.746082	2.8135	0.639065	-0.598009	0.579579	2.51898	0.0227312	0.509949
Lipg	-1.99771	0.546525	0.456716	0.955032	1.90037	1.10632	0.299696	-3.30391	0.90201	2.51881	0.0227393	0.509949
Lrrc57	1.35115	1.23657	1.47411	-0.111174	1.88667	0.980105	0.514874	1.75848	3.02092	2.48837	0.022789	0.509949
Gm35588	-1.7504	-0.385405	-0.399657	1.44233	0.296677	-0.654184	-1.7504	-0.417528	0.20225	2.57153	0.0227963	0.509949
Mecom	-3.61302	-0.997553	0.35032	-2.2412	-4.919	-1.26428	0.114895	0.771339	1.17069	2.51736	0.0228084	0.509949
Dhx40	-0.323078	0.061756	-0.360586	0.292554	0.32673	-0.028071	-0.343267	-1.38213	2.1997	2.48789	0.0228126	0.509949
H3c15	-2.04376	-1.92251	-3.31373	-1.54151	-3.31373	-1.51166	-1.61475	-0.843835	0.239125	2.67162	0.0228454	0.510206
Gm32432	1.93772	-1.09546	0.501161	0.105967	1.74051	-1.09546	0.268687	0.275753	0.21501	2.55272	0.0228733	0.510353
C2cd2	-4.02352	-0.815993	1.17996	-2.7434	0.443625	-0.0636311	-0.263268	0.642597	0.955572	2.51483	0.0229291	0.511123
Mme	1.39767	0	0	3.27502	0	0	1.22854	2.41501	0.172624	2.74773	0.0230191	0.512414
Lamc2	1.9771	2.29168	0	1.11352	2.7745	0	2.15975	0	0.186766	2.65933	0.0230298	0.512414
Ptafr	-2.79374	-2.79374	-0.376147	-2.79374	-0.291316	-0.61738	-0.839933	-2.79374	0.217572	3.31172	0.0231392	0.514369
Sema4c	3.79405	2.8077	4.2566	3.79385	3.38957	3.54729	5.46717	0.0411326	2.13854	2.48083	0.0231607	0.514369
Lypd8	0	2.23731	1.43708	1.30398	0	0	0	3.21305	0.162226	2.7421	0.0232419	0.515696
Gm30989	0	0	0	1.20138	2.94836	0	1.38755	0	0.127662	2.87205	0.0233088	0.515887
Cd300a	0	0	2.23279	0	0	0	2.40735	0	0.095963	3.09117	0.0233241	0.515887
Cops7b	-0.542028	-0.0755911	-0.512875	-0.497996	-2.34952	-0.00517428	-0.879135	-1.23238	2.37103	2.4773	0.0233372	0.515887
Gm7529	-2.56238	-0.0853159	0.543035	-0.629721	-1.18236	-2.56238	-2.56238	-1.19113	0.227766	2.58932	0.0233509	0.515887
Greb1l	-1.43939	-3.75766	-0.701792	-1.84837	-0.707694	0.492368	-2.23966	-3.79831	1.10304	2.47661	0.023372	0.515887
Lmx1a	0	1.55201	0	3.4744	0	3.83882	3.0338	2.98965	0.390489	2.65087	0.0233906	0.515887
Cd177	-2.18154	0.470278	0.00426555	-2.28898	-3.48836	-1.37053	-1.59188	-2.11523	0.414424	2.50508	0.0234014	0.515887
Cmah	-4.26027	-4.26027	-3.1879	-1.36679	-0.763867	-1.42808	-4.26027	-0.0529885	0.510032	2.58694	0.0234587	0.516674
Tlr1	-1.09404	-1.09404	-1.09404	-1.09404	0.212437	0.18555	1.63927	-1.09404	0.123594	2.73581	0.0234932	0.516884
Gjd4	0	0	1.59264	0	0	0	2.32916	0	0.0781744	3.08513	0.0235114	0.516884
Fgf18	3.23935	1.43676	0	1.11326	1.24049	1.09577	0.879328	0	0.1617	2.75169	0.0235363	0.516956
Dennd2d	1.20574	0	1.42782	0	0	0	1.13355	3.1025	0.129012	2.73379	0.0235747	0.517325
Gm12297	-0.00378404	-1.20991	1.27711	-1.20991	-1.20991	0.476942	-1.20991	1.70079	0.16131	3.72596	0.0237158	0.519622
Gm13198	-3.50141	-3.50141	-3.50141	-2.30255	-3.50141	-3.50141	-3.50141	-3.50141	0.128609	3.07837	0.0237228	0.519622
Mindy4	-2.76153	-1.68501	0.633039	-2.22155	-1.02223	-0.979068	-0.931295	0.789146	0.785835	2.46739	0.0238391	0.521487
Gsg1	0.0140044	0.0726311	0.682965	-2.03995	1.87709	-0.942843	-2.03995	-2.03995	0.294439	2.57838	0.0238515	0.521487
Slc16a12	-0.72297	-3.64821	-2.57566	-2.44636	-1.67103	0.0752937	0.994287	-2.22155	0.51395	2.49471	0.0239143	0.521583
Sh3rf2	1.20641	1.36499	2.45814	0	0.946536	1.92599	2.97201	0	0.186562	2.57695	0.0239179	0.521583
BC028528	-3.59251	-0.539352	-2.9415	-0.977153	-1.07495	-0.69755	-0.475832	-3.08526	2.06996	2.46579	0.0239212	0.521583
Gatad1	1.29616	-0.192553	0.549331	-0.477458	0.737817	-2.32047	-0.129366	-2.32047	0.35896	2.52811	0.0240405	0.523287
Flnc	-1.49474	-0.817991	-5.00666	-1.6554	-1.98804	-1.9738	-1.34847	-5.00666	0.757778	2.52805	0.0240431	0.523287
Sh3tc2	-3.27886	-2.0035	-1.65349	-0.353307	-0.00672269	-1.28316	0.674668	1.40216	0.596235	2.49031	0.0241352	0.524814
LOC118567856	0.769225	0.647636	0.252142	-0.119184	0.401807	0.231735	0.544368	0.725212	4.59857	2.46021	0.0242093	0.525027
Chsy1	-2.95053	-1.76082	-1.30767	-0.723596	-2.4749	-2.14851	-0.72744	-0.348493	1.08596	2.45992	0.0242246	0.525027
Robo4	1.69071	-1.21501	3.27857	-0.0871609	1.69347	2.42169	3.4018	3.31092	0.736601	2.48779	0.0242628	0.525027
Gm44180	-1.5268	-2.73231	-0.824773	-2.73231	-2.73231	-2.73231	-2.73231	-2.73231	0.111271	3.63902	0.0242727	0.525027
Cox6b2	0	0	0	0	1.75527	2.96049	1.27557	0	0.131526	2.84577	0.0242756	0.525027
Ulk3	0.468629	-0.249724	-1.73493	0.25622	-0.230436	2.40469	-0.240683	-1.5491	0.978666	2.45892	0.0242766	0.525027
Aldh1a2	-4.18897	-0.638675	-1.35505	-0.212811	-0.886832	-0.979408	-2.05063	-0.44997	0.662711	2.48708	0.0242988	0.525033
Gm25203	-1.73919	-2.94635	-2.94635	-1.11452	-1.19113	0.293557	-0.662183	-2.94635	0.259605	3.06063	0.0243233	0.525088
Il1rapl2	1.26981	0	2.69406	1.19892	2.68347	0	2.37059	1.33285	0.198379	2.98772	0.0243543	0.525205
Dpep1	0	0	2.64212	0	2.70639	0	0	1.33231	0.132228	2.84257	0.0243964	0.525205
Gm2996	-0.752006	-3.11238	0.201237	-3.11238	-0.41705	-0.517767	-0.209784	0.687515	0.445254	2.52068	0.0244043	0.525205
Gimap9	1.26938	1.2613	0	1.19883	2.43342	0	0	0	0.103962	2.7133	0.0244164	0.525205
Togaram2	-4.36763	-3.61365	-1.29483	-3.75067	-1.73129	-1.78738	-1.92278	-0.628542	1.04455	2.45544	0.0244587	0.525344
Slco1a1	0	0	0	0	2.19396	0	2.17309	1.37081	0.106278	2.94138	0.0244667	0.525344
B4galt1	-1.38975	-1.87153	-3.52469	-2.88477	-0.429016	-2.56625	-1.18342	-4.59983	0.580344	2.48328	0.0244926	0.525428
Tesk2	-0.0710855	-1.70333	-0.882255	-0.139048	-1.65988	-0.348711	-2.18963	-4.15101	0.668438	2.48238	0.0245384	0.52594
Gpr146	-1.29058	-0.255421	-1.59515	-0.28371	0.194054	-0.277487	-0.533976	-0.589539	3.18848	2.45225	0.024627	0.527055
Gm6342	-2.05905	-3.8289	-5.21648	-2.93312	-1.98597	-2.81932	-1.5385	-1.62766	0.682439	2.48051	0.0246345	0.527055
Gm32293	-3.23572	-4.6062	-4.6062	-4.6062	-4.6062	-4.6062	-4.6062	-4.6062	0.203919	3.04386	0.0248352	0.52953
Agbl3	-4.70284	-2.03181	-4.5088	-3.79976	-0.941642	-1.28417	-0.478042	-0.533984	1.87247	2.44825	0.024839	0.52953
Slc16a8	0	0	0	0	2.43217	0	0	1.33181	0.0792221	3.04073	0.0249388	0.52953
Cntnap5b	2.11472	0.43424	-0.969233	-0.192814	0.706867	-2.03427	1.11704	-0.662023	0.401724	2.47459	0.0249412	0.52953
Nr2e1	-0.348192	-0.539574	-3.33112	-1.86282	-0.71895	-1.07473	-0.146297	-2.11764	1.06974	2.44571	0.0249752	0.52953
Cd48	-2.55994	-0.577915	-0.0981675	-1.4454	-0.765448	-2.55994	-0.00500677	1.04973	0.302015	2.50922	0.0249765	0.52953
Anks6	-2.04375	-0.781216	-0.988096	0.846102	-2.04375	-2.04375	0.613707	-0.710896	0.19888	2.55446	0.0249848	0.52953
Cdrt4os2	0.0930187	-1.27637	0.88719	-1.27637	1.54908	1.00184	3.02038	1.30379	0.344721	2.50868	0.0250039	0.52953
Gm4398	-4.12018	-4.12018	-4.12018	-2.27959	-2.13083	-4.12018	-2.09635	-2.10523	0.271381	2.61454	0.0250077	0.52953
Gm4405	-4.12018	-4.12018	-4.12018	-2.27959	-2.13083	-4.12018	-2.09635	-2.10523	0.271381	2.61454	0.0250077	0.52953
Gm9127	-4.12018	-4.12018	-4.12018	-2.27959	-2.13083	-4.12018	-2.09635	-2.10523	0.271381	2.61454	0.0250077	0.52953
Gm5147	-0.457323	-0.726865	-0.286701	-2.03463	-0.611313	-0.802897	0.0678046	-0.256878	1.64994	2.44495	0.0250156	0.52953
Tepsin	-2.05784	2.90016	2.09242	2.01286	2.16974	2.37791	2.67355	-0.681151	0.972032	2.4724	0.0250556	0.529908
Plscr2	-0.881885	-2.27001	-0.594348	-2.27001	1.46823	-2.27001	-0.0475758	-2.27001	0.244044	2.61155	0.0251457	0.531344
Gm15528	0	3.19577	1.67981	0	1.81342	1.80182	1.2284	0	0.181315	2.61053	0.0251927	0.531498
Adgrv1	0	3.80758	3.8092	3.94573	3.75422	4.09074	5.67395	0	0.850562	2.5501	0.0251974	0.531498
Sct	1.30668	2.08708	3.05899	3.72866	1.35422	2.63108	2.65546	4.53771	0.500273	2.46911	0.0252285	0.531686
Kcnh4	1.07776	2.35152	0.961081	-0.162734	0.0276554	-0.180152	-1.27675	-1.27675	0.239199	2.50201	0.0253434	0.533632
Bmp8a	-2.98283	-1.59885	-2.98283	-1.8694	-0.932229	-1.88687	-1.03044	-2.98283	0.177567	2.66311	0.025384	0.533632
Tuba3b	-3.03597	-1.77838	-1.64907	-1.74953	-3.09226	-3.45039	-2.44715	-1.88266	1.19775	2.43808	0.0253877	0.533632
Tead2	-1.75399	-1.79811	-2.00479	-0.34941	-3.06102	-0.760825	-3.06102	-1.69046	0.23197	2.5005	0.0254211	0.533865
Oasl1	1.30659	2.99356	3.85273	1.89951	3.55636	2.45993	3.70327	4.08361	0.583354	2.46452	0.0254719	0.534463
Wdr31	-3.58124	-0.896933	0.193772	-0.470989	-3.58252	0.388638	0.000442012	-2.7614	1.12396	2.43591	0.0255058	0.534705
Gm5136	2.29273	2.0729	2.22086	0	0	2.37178	1.36299	0	0.172644	2.84551	0.0255391	0.534935
Bclaf3	0.0485212	-1.48966	-0.227883	-6.13088	-1.71656	-1.62265	-1.3966	-0.54153	1.74755	2.46056	0.0256834	0.5361
Zfand2a	-2.94519	-0.893924	-1.53285	0.270569	0.97238	0.212001	-2.94519	-0.106879	0.441531	2.49516	0.0256971	0.5361
Alox5	-1.75619	1.6652	1.04519	0.103989	1.25582	1.34923	-1.75619	1.19366	0.382613	2.49477	0.0257174	0.5361
Nat8f3	-2.74489	-2.74489	-2.74489	-2.74489	-0.697104	-2.74489	-2.74489	-2.74489	0.109299	3.017	0.0257398	0.5361
Cd300c	0.925083	0.611325	-1.79782	-1.74891	1.08269	0.700031	-0.0639769	-0.353324	0.582872	2.43082	0.0257859	0.5361
Pbld2	1.67819	-1.8706	1.65383	-1.8706	-0.912634	1.83475	-0.598209	1.44511	0.412376	2.49335	0.0257914	0.5361
Cdk2	2.94778	4.33043	2.49727	2.75797	3.93189	3.50807	1.12859	3.00635	0.586905	2.45852	0.0257931	0.5361
Wiz	-2.51636	-6.3886	-2.14648	0.191357	-1.01935	0.689168	0.131764	0.104774	4.13622	2.43066	0.0257951	0.5361
Gm14548	0	0	0	0	2.05451	3.12438	0	1.51328	0.153944	2.80556	0.0258381	0.5361
Fbln7	-4.53853	-1.91921	-2.41984	-1.90539	-1.80432	-1.22698	-2.21678	-4.53853	0.481458	2.49244	0.0258387	0.5361
Sox13	2.6583	2.20175	3.76173	3.47225	4.05801	2.94818	-0.239842	2.52332	1.55923	2.42983	0.025841	0.5361
Spdl1	0	2.8538	3.32083	1.11393	1.98993	1.09651	1.98073	0	0.230483	2.53593	0.0259003	0.536866
Mlxipl	-2.41819	-2.41819	-2.41819	0.68983	-2.41819	-1.13988	0.778671	-2.41819	0.239582	2.67777	0.0259509	0.537068
Klhl3	-1.38325	1.25461	-1.85589	0.869507	-0.22238	1.26563	0.522187	-3.70067	0.953774	2.45553	0.025955	0.537068
Ccdc77	0.741605	-5.57097	-0.25118	-0.0384429	-4.35561	-1.49675	-0.630318	-4.19147	1.51878	2.45338	0.0260718	0.538401
Anxa8	-3.49398	-1.61329	-3.49398	-1.93704	-1.70293	-3.49398	-2.61411	-3.49398	0.189706	2.59113	0.0261097	0.538401
Fbn2	0	1.39139	1.05522	1.93311	0.946318	1.09593	3.25581	0	0.17573	2.93969	0.0261158	0.538401
Esr2	1.42485	-0.479343	-1.87041	1.01835	0.184472	-1.87041	-0.504125	1.20632	0.303858	2.48703	0.0261232	0.538401
Cldn23	-2.45944	-1.19703	-1.40398	-0.689733	-0.402013	-2.45944	-2.45944	0.32647	0.188198	3.29383	0.0261318	0.538401
Ccrl2	-1.76208	-3.06913	-3.06913	-3.06913	-2.12338	-3.06913	-1.37309	-1.63869	0.148503	2.958	0.0261882	0.538446
H3c6	-0.500441	0.586823	-1.8704	-0.668943	-1.8704	-0.0682187	0.699866	1.54339	0.267707	2.48566	0.0261958	0.538446
Nkain1	-2.10841	0.762179	2.24565	-0.931356	1.09877	-0.397483	-0.592156	-2.73027	1.09459	2.42337	0.0262015	0.538446
LOC118567614	0	0	0	0	2.4049	0	1.69362	0	0.0853249	3.00162	0.0262743	0.538476
Mamdc2	3.31876	0	1.42935	3.17653	3.69234	1.23173	2.85782	0	0.370065	2.52839	0.0262824	0.538476
Gdpd5	-1.40363	0.803879	2.19324	1.95659	2.82315	2.81572	-0.0443438	1.57223	1.22822	2.42132	0.0263174	0.538476
Hs3st6	0	0	0	1.20137	3.34901	0	0	0	0.122622	2.99945	0.0263505	0.538476
Serpina1a	-0.54943	-3.95269	-0.267035	-0.604649	-0.86163	-0.921212	0.502966	-3.95269	0.666308	2.4825	0.0263636	0.538476
Kl	1.30705	0	0	1.90324	3.09749	0	1.28828	0	0.151309	2.6752	0.0263862	0.538476
Zfp990	0	1.98685	0	0	0	0	2.39258	0	0.0921621	2.99805	0.0264001	0.538476
Acacb	-1.4022	2.62593	0.00162114	1.87124	2.48997	1.22545	3.14972	-0.0609001	0.606598	2.44738	0.0264005	0.538476
Mcoln2	0	1.26163	0	1.11289	0	3.14541	0.878623	0	0.127399	2.70888	0.0264254	0.538476
Kirrel	2.74517	3.61929	2.65654	0.511029	2.28209	1.96854	0.424846	-1.27114	0.675648	2.44675	0.0264357	0.538476
Ttll8	-1.09465	-1.09465	-1.09465	-1.09465	0.145849	0.263358	1.22791	1.83925	0.16088	2.72723	0.0264727	0.538476
Rin1	-1.09974	-2.48925	-2.48925	-2.48925	-0.44072	-2.48925	-2.48925	-1.11836	0.126405	2.66618	0.0264728	0.538476
Pif1	-1.18114	-2.5524	-2.5524	-2.5524	-2.5524	-0.866239	-2.5524	-1.18153	0.121074	2.66519	0.0265177	0.53893
Dpys	0	1.39139	2.66715	0	2.19423	0	2.77914	0	0.176855	2.66424	0.026561	0.538932
Cdk15	1.33483	2.23185	0.62571	0.0776239	3.23434	1.93739	-1.21346	2.52435	0.531112	2.44445	0.0265628	0.538932
Naip2	2.78201	0	1.05403	0	2.04809	0	0	0	0.116176	2.78722	0.0265857	0.53894
Tgfbrap1	0.342296	-4.04677	-2.25854	-2.50682	-0.393743	0.141852	-2.15627	-1.36789	1.87343	2.41581	0.0266302	0.539223
Gm11197	-1.6578	-2.86459	-2.86459	0.0437006	-1.41492	-1.1768	-0.813245	-2.86459	0.221928	2.9836	0.0266508	0.539223
Ttc16	3.64836	2.09044	3.40914	4.39182	3.37681	4.72517	4.13748	0	0.791376	2.47649	0.0266861	0.539223
C2cd4b	-1.09492	-1.09492	-0.0396492	1.85598	-1.09492	1.3086	-0.215272	0.919845	0.178164	3.08481	0.0266897	0.539223
Npsr1	0	1.39134	2.6746	1.20142	0	2.63816	2.16001	1.43025	0.193756	2.51991	0.0267189	0.539358
Gm10125	-1.4321	1.2454	1.78476	0.470777	-1.4321	0.25576	0.419789	-1.4321	0.226903	2.74571	0.0268037	0.54042
2210418O10Rik	2.65539	-1.0955	-1.0955	1.00337	-0.148361	0.606661	0.268723	-0.215973	0.21802	2.57313	0.026821	0.54042
Olfr90	0	2.8782	2.22084	1.2014	0	1.6725	1.94608	0	0.170107	2.97849	0.0268393	0.54042
Vav1	-3.27737	0.170855	-1.84327	-3.27737	-0.81088	-2.18009	-0.437804	-3.27737	0.314531	2.51692	0.0268746	0.540528
Ankrd23	-3.61224	-3.61224	-3.61224	-3.61224	-1.35261	-3.61224	-3.61224	-3.61224	0.156646	2.98431	0.0268898	0.540528
Prss23	-1.59529	-1.37478	-1.18744	-1.50661	-0.882955	-1.52417	-0.903491	-1.98231	4.92986	2.41073	0.0269221	0.540723
4632404H12Rik	0	0	0	1.84243	2.58192	1.67153	0	0	0.117123	2.93681	0.026947	0.54077
Dclre1c	-1.67076	-1.68821	1.7288	0.72994	0.133015	-0.161756	-0.283526	-1.0143	1.46575	2.40983	0.0269739	0.540857
Cyp26b1	1.80516	0.310831	0.773792	1.56947	-0.963566	0.672642	-3.03487	0.561203	2.1619	2.40903	0.0270203	0.541334
Kcnh7	-1.8604	-6.24331	-1.16127	-1.85704	-2.40696	-2.06741	-2.7257	-2.04463	2.26854	2.40862	0.0270443	0.541361
Adgrd1	1.73649	-1.09515	0.25568	-1.09515	-1.09515	0.606676	1.30092	0.919155	0.193493	2.51293	0.0270841	0.541704
Gm3678	3.71575	1.97229	2.80035	3.89518	2.11372	1.80512	3.17267	2.09755	0.456186	2.43358	0.027173	0.543029
Tgfbi	-1.00037	-2.18416	0.855684	-0.148946	-0.481084	-4.09346	-0.238059	-0.393435	0.813484	2.43315	0.0271976	0.543067
Ints6l	-1.93839	-1.87574	-2.66818	0.573156	-1.40165	-2.84091	-2.33198	-0.841215	0.769998	2.40509	0.0272497	0.543655
H3c11	-0.443297	0.415607	-2.835	0.897274	-1.1401	-0.557412	0.439037	1.0526	0.523061	2.43116	0.0273111	0.544366
LOC118567717	1.89749	2.09573	1.05625	1.19895	2.32113	1.11445	3.37693	0	0.23327	2.47302	0.0273309	0.544366
Kcnt1	1.60994	1.26635	-1.03361	1.93001	0.0749876	-4.55047	0.601034	-2.61848	2.62416	2.40302	0.0273709	0.54471
Emid1	2.10073	1.56173	-0.938239	1.07747	1.48524	2.83569	0.194142	-2.01818	0.689094	2.42952	0.0274044	0.544923
Aven	-1.21119	-0.269163	0.022173	-0.925531	-1.48447	0.964046	0.943855	-4.9736	1.47525	2.42889	0.0274407	0.545194
Meiob	-1.74324	-1.68449	-3.04991	0.582933	1.02194	0.234911	-0.351058	-1.55141	0.507039	2.42753	0.0275186	0.545979
Tecpr2	-0.657757	0.0291842	-1.80732	-2.301	-1.5433	0.859372	-0.281475	-1.19402	2.37542	2.40039	0.0275259	0.545979
Zfp808	0.844494	-2.54482	0.777185	2.24709	1.1709	-0.143576	0.242748	-0.491337	0.640459	2.42655	0.0275751	0.54625
Cct6b	1.37152	0	0	0	0	1.11313	2.4806	0	0.0967637	2.76354	0.0275852	0.54625
Gm4631	0	3.18749	1.05375	0	0	0	0	0	0.103743	2.96446	0.0276156	0.546401
Gm41626	0.0860005	-1.46732	-2.85845	-1.58852	-2.85845	-0.143841	-0.27726	-2.85845	0.274166	2.50137	0.0276993	0.547605
Zfp708	1.72711	1.8524	-0.218572	0.885947	0.176076	2.19865	0.597348	-1.2764	0.33744	2.42218	0.0278281	0.549697
Sesn2	0.997568	-2.57352	-2.57352	-0.296288	-0.106062	0.395302	-0.456963	-0.476768	0.361614	3.23404	0.0278654	0.549721
Strc	-0.526191	-1.30859	-2.74566	-2.74566	-2.74566	-2.74566	-2.74566	-2.74566	0.130665	2.75683	0.0278752	0.549721
B3gnt3	-1.43589	-1.43589	-1.43589	-1.43589	-1.43589	1.35523	-1.43589	-1.43589	0.101141	2.95606	0.0279288	0.550072
Stard6	-1.21014	0.18112	-1.21014	-0.00870947	1.16035	-0.0957875	-0.0769506	2.5455	0.222384	2.5873	0.027939	0.550072
Mamstr	0	0	0	0	2.94676	0	0	0	0.0959999	3.35298	0.0279673	0.550176
Ptgis	0.132578	0.00791791	0.450348	-2.55915	-0.263764	-1.45392	1.4721	1.04083	0.486011	2.41839	0.0280492	0.551335
Prss54	1.26974	0	1.35094	1.27064	0.946449	1.096	3.55539	0	0.182187	2.63709	0.0280908	0.5517
Ces1c	1.79962	-1.27719	-0.22276	-1.27719	-0.33173	-1.27719	-1.27719	0.0551439	0.135322	3.59806	0.0281569	0.552217
Pik3r5	-1.89944	-0.508431	0.763519	1.8103	-1.89944	0.464884	-0.532563	1.24025	0.331282	2.44987	0.0281633	0.552217
Atp23	-1.45765	-4.47273	-0.272288	-2.63923	-0.727183	-0.86886	-0.178001	-3.09668	0.747327	2.41547	0.0282207	0.55289
Zfp970	-2.78404	-2.78404	-2.78404	-2.78404	-0.726708	-1.68807	-0.251493	-1.45134	0.178655	2.55138	0.0282455	0.552924
Ccl2	0.796814	0.548325	1.16679	-0.159891	-2.021	-2.021	-0.655743	-2.021	0.259373	2.48936	0.0283532	0.554579
Akr1b10	-2.55172	-0.0471292	-0.351107	-0.879868	0.304085	0.0868173	-1.08142	-4.39466	0.918999	2.41252	0.0283953	0.554948
H1f2	0.0969913	1.70539	-1.21004	-1.21004	0.238881	-1.21004	0.482064	1.57641	0.195219	2.59793	0.0284269	0.555041
Islr	-2.70053	-2.51058	-0.0994838	-1.87423	-1.0015	-2.15691	-1.40983	-3.65744	1.19285	2.38499	0.0284502	0.555041
Zfp426	-1.43149	2.01676	1.29225	1.67659	-0.483753	-1.43149	-1.43149	-1.43149	0.2507	2.54422	0.0284696	0.555041
Spats2	0.184563	-0.374504	-1.78901	0.561405	0.930331	0.88109	1.28623	-4.53424	1.48228	2.40816	0.0286553	0.557907
Gm34110	-1.74963	-0.384658	-1.74963	1.18267	-1.74963	-0.635934	-1.74963	-0.236283	0.150132	3.02269	0.0286632	0.557907
Ctf1	-3.94222	-2.31511	-5.2191	-3.30218	-0.600396	-1.61942	-1.0372	-0.485182	0.926926	2.40723	0.0287112	0.558388
Mfsd12	1.95535	0.549504	-1.43204	-0.161775	-1.43204	-1.43204	0.771552	0.582574	0.229159	2.48103	0.0288166	0.559505
Fam83g	-1.47767	-1.35605	-1.32075	0.142369	-2.74742	-2.74742	-2.74742	-2.74742	0.182963	2.537	0.0288515	0.559505
Tmem54	0.0936457	1.5767	-1.27694	1.83085	-1.27694	-0.18083	-1.27694	-1.27694	0.191684	2.53685	0.0288599	0.559505
Stat4	-2.61173	-2.61173	-2.61173	-2.61173	-2.61173	-2.61173	-2.61173	-2.61173	0.0728957	3.32275	0.0288621	0.559505
Sema3f	0	2.02712	2.64323	2.61983	0	0	1.28803	0	0.160471	2.61412	0.0289547	0.560375
Sdk1	1.91842	1.99883	0.0672068	-0.112078	-0.740155	0.893913	1.15247	0.63958	0.676214	2.3763	0.0289852	0.560375
Gm29718	0.821679	0.630563	-2.16686	-2.16686	-0.851049	0.928838	-0.0119696	-0.795374	0.30436	2.43563	0.0289865	0.560375
Cd55b	1.12616	-0.658279	-2.0422	-2.0422	-2.0422	0.558957	-2.0422	-0.709285	0.207876	2.53406	0.0290088	0.560375
Gm4908	-3.80106	-3.71934	-3.49933	-1.44663	-2.61714	-4.00019	-2.17132	-2.26559	0.577327	2.37501	0.0290651	0.560375
Nbeal1	-0.530858	-2.3146	-0.655778	0.105595	-0.481544	0.0303621	0.394943	-1.76176	4.76943	2.37497	0.0290676	0.560375
Nckap5	1.14263	-1.24588	-0.0235703	-5.53499	-0.688581	0.220635	-1.14707	0.232079	2.84391	2.37492	0.0290708	0.560375
Cpa5	1.38904	0	1.42707	1.2014	0	3.12463	1.22871	0	0.163133	2.53213	0.0291122	0.560721
Pira2	0	0	0	0	0	3.59573	0	0	0.146365	3.31176	0.0291953	0.561813
Gm11335	-3.06376	-3.06376	-3.06376	-1.86238	-1.74491	-3.06376	-3.06376	-1.63329	0.138983	2.60891	0.0292159	0.561813
Itln1	2.52859	0	0	3.13132	1.23979	0	1.79465	3.24465	0.24901	2.52974	0.0292415	0.561855
Cnn1	-2.19925	-2.6287	-1.92935	-1.27711	-2.13827	-4.18088	-2.00359	-2.8446	0.38949	2.39643	0.0293657	0.563788
Cfb	-1.14454	-2.32443	-2.36742	-2.35369	-4.63606	-0.521629	-4.63606	-3.13812	0.521582	2.42817	0.0294274	0.564496
Aspg	0.374027	1.76006	-0.507727	-1.55749	-0.0618802	1.52216	-1.47188	-0.00261551	0.591019	2.36888	0.0294497	0.564496
Cps1	0	0	0	1.11305	0	1.09555	3.59395	0	0.142154	2.72008	0.0295235	0.565458
Bmf	-0.0336252	-3.67988	-1.77319	-2.48077	-0.800129	-1.57443	-3.67988	-2.30861	0.357953	2.4256	0.0295807	0.565763
Hjv	0	0	0	3.35617	0	0	0.878362	0	0.115327	2.91326	0.0295867	0.565763
Pou4f1	4.55745	4.98979	4.31266	4.75379	3.06416	4.54024	0	3.88256	1.00804	2.42486	0.0296247	0.566037
Gm11189	-0.625031	-0.337546	-0.466768	-0.349356	-0.663637	-0.0895039	0.491081	-0.177312	3.03731	2.36525	0.0296799	0.566475
H2-Ob	-1.27734	-1.27734	-0.223575	-1.27734	-1.27734	-1.27734	-1.27734	1.71437	0.104241	2.71613	0.0297068	0.566475
Mak	-3.98378	-3.27579	0.0748291	-0.214248	-0.807498	0.968272	0.076167	0.3716	1.71712	2.36464	0.0297186	0.566475
Tesmin	1.30707	2.67516	0	0	0	0	0.87787	0	0.0934365	3.15886	0.0297847	0.567194
Cracr2b	-2.77841	-2.77841	-2.77841	1.22765	1.54454	-0.142014	0.0573614	0.452435	0.526088	2.46343	0.0298199	0.567194
Slc25a45	-1.65746	-1.65746	0.800047	-1.65746	-0.351861	-1.65746	0.213255	1.08111	0.168993	2.519	0.0298274	0.567194
BC051019	2.52648	0	0	2.88815	0	0	1.28839	0	0.147276	2.71175	0.0299111	0.568335
Apela	0.171255	2.35469	2.77357	0.0993322	0.589539	1.69359	0.166718	1.04688	0.36842	2.36064	0.0299746	0.568681
LOC118567918	2.87396	0	0	0	1.44805	1.68693	2.49905	0	0.165813	2.59319	0.0300192	0.568681
Ankrd13a	0.318551	-0.440017	1.32581	0.972863	-1.56478	1.00354	1.62997	-2.53235	0.573951	2.3857	0.0300316	0.568681
Drc7	0.111227	-1.09558	-1.09558	-1.09558	-0.148337	2.08631	1.70503	1.12733	0.223275	2.45966	0.030039	0.568681
Pml	4.5084	2.80639	4.20102	3.52876	2.3376	5.49074	3.12686	4.6331	0.959919	2.38527	0.0300584	0.568681
Gm32316	-2.4874	0.557028	1.00293	1.79544	1.52717	1.39082	2.22223	0.341263	2.07474	2.35913	0.0300718	0.568681
H3c10	-0.665948	0.193127	-3.05774	0.674658	-1.36266	-0.780104	0.216062	0.830041	0.531943	2.38463	0.0300989	0.568743
Ercc6l2	1.99282	1.21396	1.79509	0.428009	1.43839	0.380652	1.38272	-2.57766	1.65933	2.35612	0.0302662	0.571453
LOC118568020	1.20563	0	1.35157	1.11281	2.9016	0	0	0	0.120827	2.85159	0.0303142	0.571909
D030056L22Rik	-0.699391	-0.0215367	1.14409	-0.886553	-0.638865	-2.08797	-1.20789	-2.08797	0.201719	2.41263	0.0303673	0.57246
Cntn4	-0.659647	-1.43873	0.748488	-0.711177	-3.05828	0.107768	1.13988	-2.87418	2.65246	2.35339	0.030444	0.573236
Lrmda	-0.0842082	-3.7115	-1.66643	-0.10036	0.424656	-0.157822	0.00239937	-2.27012	1.8752	2.35301	0.0304685	0.573236
Mical1	2.23172	-3.00304	-1.63018	3.13092	2.51639	1.39821	2.64605	1.00338	1.48127	2.3781	0.0305119	0.573236
Ccdc57	0.436846	0.172028	-3.95484	-0.902882	-1.93047	-2.84614	-3.95484	-0.230827	0.641147	2.40998	0.0305307	0.573236
Tcp10a	0	0	0	1.27145	0.944526	1.09495	2.33	0	0.0952568	2.58321	0.0305407	0.573236
Macroh2a3	0.776966	-2.67244	-1.60754	0.857924	-0.927882	-0.868346	-0.108776	0.277125	0.400331	2.39464	0.0305635	0.573236
Gm29745	1.81363	2.86846	2.22104	1.90303	0	0	0	2.44187	0.19315	2.50531	0.0305916	0.573236
Nectin3	3.50424	1.47706	0.120371	1.50584	2.341	1.34838	1.62576	2.61553	2.09834	2.35087	0.0306082	0.573236
Stx11	0.0597899	-1.21039	0.930127	2.093	1.23083	0.067386	1.98941	-1.21039	0.29754	2.40847	0.030624	0.573236
Sox6	-1.87369	-2.12648	-3.71899	-1.91473	-1.38057	-1.94282	-1.30042	-1.17172	5.55859	2.34964	0.0306892	0.573968
Lrrc18	0	2.14781	2.6438	1.1134	0.946312	2.29111	1.65068	0	0.175441	2.44829	0.030711	0.573968
H3c7	-0.440598	-0.370146	-2.83089	-0.243691	-1.13905	-1.02643	0.243623	1.05371	0.41777	2.3743	0.0307551	0.573994
Prkcd	-0.160171	-1.11117	-1.02449	-2.58731	-0.217844	-0.622897	-4.48111	0.583567	0.918228	2.37417	0.0307636	0.573994
Tacr3	1.03661	-2.22862	0.19449	0.182982	-0.923487	0.0594571	1.56437	0.894112	0.427768	2.40013	0.030795	0.573994
Lrrc39	0.232074	-2.59293	-2.59293	0.682491	0.676922	-2.59293	0.187562	-2.59293	0.337476	2.50141	0.0308132	0.573994
Gm33856	-1.81963	-0.650464	-3.77298	-2.57139	-0.436809	-2.54134	-1.46649	-3.77298	0.3728	2.40512	0.0308323	0.573994
0610009E02Rik	2.03807	0	2.14209	3.0731	1.68662	0	1.76814	0	0.196455	2.50065	0.0308567	0.574002
Zswim4	0.856623	-1.09635	1.73188	1.54164	1.802	0.136505	1.60092	-1.09635	0.281979	2.69747	0.0309728	0.575638
Gprc5a	1.94919	0	0	2.61298	0.94481	0	0	0	0.107078	2.68882	0.0310065	0.575638
Prom2	0	0	2.23138	1.1121	0	0	0	0	0.0626657	2.87838	0.0310168	0.575638
Vstm2b	4.08024	2.74672	4.23634	2.54086	4.03439	2.2305	2.11434	2.65661	1.93779	2.343	0.0311286	0.576379
Ptpn3	-2.24249	0.0489754	-1.18725	-2.24249	0.0179749	-1.0092	-2.24249	-0.177302	0.176619	2.44067	0.0311695	0.576379
Prdm5	-1.8322	-0.386619	-2.73537	-0.677297	-0.128867	0.413616	-1.59845	-3.41094	1.0335	2.34222	0.0311806	0.576379
Abca16	-1.21019	-1.21019	0.140247	-0.0112426	-1.21019	1.59204	2.94164	-1.21019	0.236665	2.49484	0.0311896	0.576379
Acp4	-4.3568	-0.112305	-0.852516	-4.3568	-1.47407	-0.963046	-4.3568	-0.179064	0.628793	2.44027	0.0311938	0.576379
H4c18	-0.260807	-1.90561	0.972668	0.523133	-0.101597	0.0114436	1.43414	0.579351	0.797931	2.34192	0.0312012	0.576379
Itpr3	0.0970553	1.50472	1.43397	0.0937597	0.580727	-1.20998	-1.20998	-1.20998	0.179731	2.43888	0.0312783	0.577057
Gm41756	1.20552	0	0	0	1.3067	2.79907	0	0	0.112349	2.6831	0.0312861	0.577057
Rest	-0.921299	0.38722	-2.59596	-1.80407	-2.12147	0.0959834	-0.191151	-1.5246	0.884435	2.33989	0.031337	0.577194
Zdhhc19	-2.9124	-1.34516	-1.85769	-1.60823	-1.96664	-1.81677	-2.9124	-2.9124	0.149036	2.43716	0.0313835	0.577194
Idh2	1.23135	0.51618	0.902786	1.07963	1.04837	0.557345	0.649811	1.35752	2.94615	2.33868	0.0314184	0.577194
Epor	-1.75207	0.542308	0.970102	1.28032	1.99998	-0.474631	-0.182902	-1.75207	0.336755	2.39577	0.0314212	0.577194
Gask1a	1.20565	0	0	0	1.24085	2.79936	1.13358	0	0.122446	2.56656	0.0314323	0.577194
Gm9316	1.3697	2.63579	1.83328	1.90469	3.47836	0	2.73935	2.01517	0.301762	2.39544	0.0314421	0.577194
Mylk3	0	1.36496	0	0	1.31903	2.84998	0	1.37019	0.131106	2.56555	0.0314868	0.577194
Heatr4	-1.65603	-1.65603	0.251508	-1.65603	-1.65603	-1.65603	0.824167	-1.65603	0.110621	3.19807	0.031498	0.577194
Ccdc8	-0.478028	-2.61748	0.236766	-0.314021	0.70821	-0.924856	0.759628	-2.61748	0.372309	2.39407	0.0315293	0.577194
Xlr4b	-2.00258	-0.556738	-1.77646	-0.333505	-0.360922	-4.70621	-0.707159	-4.42263	1.48781	2.33695	0.0315346	0.577194
Gsn	-0.353201	0.161162	-0.508422	0.382137	0.330427	0.201517	0.111193	-0.487351	6.86336	2.33635	0.0315757	0.577505
G0s2	0.667744	0.471128	0.356515	0.000562842	-1.59223	-0.952564	-0.994985	0.200317	0.977026	2.33447	0.0317027	0.579039
Zfpm1	-1.111	-1.05292	-1.36012	0.817913	-2.41799	1.29626	0.404434	-2.41799	0.340255	2.39128	0.0317079	0.579039
Otud1	-1.64901	0.175666	0.539191	0.969868	-0.41605	-0.0368083	-0.611838	0.94788	1.06544	2.33388	0.0317431	0.57924
Gm34538	-1.21161	-1.21161	1.62191	2.44472	1.07597	2.35004	2.20915	0.808597	0.43195	2.38962	0.0318148	0.579711
Clic3	0	2.30606	2.45595	1.8446	0.945299	0	0	0	0.128222	2.55951	0.0318174	0.579711
Triobp	2.13134	3.74283	3.91677	3.57562	1.43746	4.62701	4.42978	2.79486	1.87641	2.33231	0.0318501	0.579783
Man1a	1.76609	0.183547	0.315425	0.404133	-0.16747	-0.980852	-0.0534807	-4.03264	1.12468	2.35725	0.0318698	0.579783
LOC118568482	-1.08252	-3.39361	-0.56508	-1.11665	-1.63841	-3.39361	-0.613252	-1.88273	0.319798	2.38776	0.0319347	0.580522
Aldh3b3	-0.552129	-1.82701	-0.927507	-1.25907	-3.09097	-0.591869	-2.2087	0.514582	0.339036	2.35523	0.0320039	0.58094
Reep4	1.541	-1.95163	0.743855	-0.17089	1.55806	1.63788	2.66304	0.805255	0.606001	2.35519	0.0320068	0.58094
Klk1b24	-2.3237	-2.3237	-0.21881	0.285198	-0.875352	-2.3237	-2.3237	-0.27719	0.175675	2.48047	0.0320304	0.58094
Kcnv1	-2.12832	0.940014	-3.34638	-0.332877	-0.864118	0.825054	-0.309233	-1.72648	0.579123	2.3538	0.0320996	0.581611
1700011L22Rik	-1.01419	-2.93217	-0.506415	-1.62902	-1.18821	-2.93217	-0.535535	-2.93217	0.22638	2.4253	0.032116	0.581611
Mmp2	2.5944	1.29722	0.634022	-1.10304	0.729312	-0.0322379	0.271191	1.62336	0.683399	2.32657	0.0322436	0.583416
Scml2	0.812533	-1.20989	-1.20989	-0.0966806	1.04976	-1.20989	1.27349	-1.20989	0.157087	2.47653	0.0322644	0.583416
Nt5c1a	-1.96603	0.864659	-3.24183	-0.108934	0.76448	0.774445	1.60295	-1.86569	0.760046	2.35053	0.0323198	0.583824
Fgr	-2.69375	-0.900735	-0.965555	-3.96542	-2.65925	-2.86438	-2.06659	-1.03646	0.390814	2.35011	0.032348	0.583824
Ebf4	1.81487	2.53879	0.683894	0.948262	-1.64731	1.16916	-0.74285	-2.97461	0.931732	2.34965	0.0323792	0.583824
Fgf17	-0.0648912	-1.43592	-0.381324	-0.237055	-1.43592	-1.43592	1.47763	-1.43592	0.143795	2.47453	0.0323845	0.583824
Sp110	-3.37503	0.733043	-0.19297	-1.20185	0.680134	0.656198	0.0865336	-4.08939	1.8607	2.32152	0.0325941	0.587159
Zscan20	-0.333756	-2.26016	1.77216	1.9982	1.56939	1.42435	0.912616	-2.97141	1.71906	2.31971	0.0327207	0.588997
Gm6568	1.10706	-0.572457	0.976752	-0.75727	-1.00792	1.12295	-1.95625	-0.585528	0.286369	2.46028	0.0329201	0.5916
B3gnt8	0	0	0	0	2.43277	1.35989	0.877815	0	0.0910227	2.65046	0.0329339	0.5916
Cenpu	0	0	1.42887	0	0	0	2.48001	0	0.0849697	2.83414	0.0329394	0.5916
Foxh1	1.26951	0	0	1.77133	0	1.23352	2.74881	0	0.129995	2.69401	0.0329896	0.592057
Scube3	0	1.38388	0	1.84052	2.72494	1.35637	3.21118	1.51205	0.231761	2.41061	0.0330474	0.592118
Itga5	2.57854	2.23583	0	2.66334	0.947214	0	2.55764	1.37052	0.22189	2.40986	0.0330955	0.592118
Gucy2e	-1.09609	2.32681	0.25414	0.206655	0.354613	0.606637	2.02328	-1.09609	0.261426	2.37007	0.0330982	0.592118
Asic3	-2.04347	-0.771769	-1.35117	-1.94633	-5.335	-0.413571	-1.15265	-5.335	1.02054	2.36986	0.0331126	0.592118
Slc11a1	-1.16659	-0.465322	0.141975	1.70645	0.567337	-3.04529	-1.31007	0.593241	0.618405	2.33846	0.0331445	0.592118
Il33	-0.312684	-4.4696	1.07718	0.401892	-3.48487	-1.35671	-0.602711	-1.20423	1.01136	2.3382	0.0331619	0.592118
Apobr	2.51384	-1.76769	1.98527	-1.76769	1.31097	1.11088	1.2278	3.15787	0.649093	2.36906	0.0331661	0.592118
Cd164l2	0.904386	-1.01732	-0.215513	0.489416	0.231476	0.910309	-1.81511	0.471815	0.814479	2.31193	0.0332703	0.59335
Flt3	-0.0762201	-1.54075	-1.47156	-3.52891	0.839129	-2.2998	-1.16631	-1.43187	0.498975	2.33608	0.0333091	0.59335
Adamts12	0	1.3913	3.23408	1.30336	0	2.47421	1.79549	1.37048	0.20946	2.40645	0.0333161	0.59335
Zfp975	-1.22309	-1.20381	-3.59197	-0.600706	-1.17613	-1.21399	0.320607	-3.59197	0.449253	2.36636	0.0333479	0.59335
Hs3st2	1.88332	2.62354	3.13386	2.55337	0.189947	1.94858	1.44257	0.0102037	0.971092	2.31068	0.0333591	0.59335
Shroom1	0	1.38408	1.35152	0	2.43444	2.06331	0	0	0.125425	2.53009	0.0334794	0.594696
E2f2	2.35355	2.26256	0	0	0	2.17542	0	0	0.132024	2.63901	0.0335335	0.594696
Crnde	-2.90742	-1.01761	-2.90742	0.399024	-0.857518	-1.22601	0.327947	0.678693	0.401245	2.36354	0.033539	0.594696
Prdm15	-0.469689	-4.17192	-0.299459	0.185021	1.20701	-2.43706	1.33642	1.4995	1.31938	2.33264	0.0335491	0.594696
Fndc7	-1.34991	-1.34991	0.870687	-1.34991	-1.34991	-1.34991	1.2656	0.31757	0.143471	2.52873	0.0335589	0.594696
L3mbtl1	1.26977	1.38396	1.05546	2.5314	0.946566	2.98131	0.879836	0	0.188079	2.36274	0.0335929	0.594858
Gm34593	2.4031	1.38391	0	2.24139	2.05771	1.68771	0	2.84929	0.216812	3.00207	0.0336759	0.595886
Pcdhb3	-3.13418	0.905295	0.255309	0.333483	0.315421	-0.325208	0.110462	-1.10978	0.585297	2.46518	0.0337212	0.596248
Gm14857	0.894638	-2.19348	-0.596526	-2.19348	-2.19348	-0.960417	0.339319	-0.0962724	0.228498	2.39932	0.0337819	0.596676
Myd88	-2.73956	0.0150892	0.243566	-2.73956	-0.0509697	-0.459808	-0.697916	-1.2286	0.312631	2.35977	0.0337953	0.596676
Ankrd35	-0.57104	-1.19046	1.09204	1.83045	2.29133	2.26203	1.49106	1.20641	0.933958	2.30419	0.0338254	0.596767
Gm14296	2.65574	-1.09537	-1.09537	0.604171	-0.148406	0.606667	0.268608	-0.215815	0.208465	2.62789	0.0339	0.597248
Gm12004	0.382649	-1.14213	1.13929	0.0584528	-0.818914	-1.39137	0.244106	-2.50723	0.352275	2.45692	0.0339047	0.597248
Tube1	-1.24226	-3.17454	0.0431666	0.109593	2.20867	0.794535	-0.63889	-0.085113	1.46406	2.30279	0.0339275	0.597248
Mir100hg	-0.597216	1.63084	1.10583	1.12146	1.43856	0.395172	2.17572	-0.530883	0.511757	2.30235	0.0339592	0.597367
Npr1	-1.0952	-1.0952	-1.0952	1.85607	0.956119	0.969628	1.29775	-1.0952	0.196589	2.44798	0.0340159	0.597669
Gm32707	0	0	0	0	0	1.67166	3.19838	0	0.123632	2.81035	0.0340263	0.597669
Gm12022	0	1.3839	3.42518	0	1.44962	1.89938	2.29746	2.04558	0.220245	2.39298	0.0342012	0.599712
Slc2a4	0	0	1.05479	2.09775	3.01715	0	1.70443	0	0.153059	2.51707	0.0342437	0.599712
LOC102634078	-3.2203	-3.2203	-1.86917	-1.44869	-1.77236	-1.94118	-3.2203	-3.2203	0.162231	2.74946	0.0342749	0.599712
Ercc2	1.38889	0	3.11584	0	0	0	1.9523	2.73867	0.175042	2.51632	0.0342879	0.599712
Chst9	-2.04378	-2.04378	-2.04378	-2.04378	0.0682956	-2.04378	0.287673	-2.04378	0.126243	2.62486	0.0342902	0.599712
Srrd	1.92471	3.50828	3.99783	3.67895	3.88176	3.25624	1.24987	1.4263	0.55296	2.32213	0.0342928	0.599712
Noa1	2.0936	3.01822	0.76425	2.16254	3.00031	3.09359	2.51972	1.17102	0.994784	2.29683	0.0343623	0.60014
Gnrh1	-2.6232	-2.6232	-1.27195	-2.6232	-2.6232	-2.6232	0.375195	-2.6232	0.15123	2.62332	0.0343737	0.60014
Clec18a	-1.20962	-1.20962	-1.20962	-1.20962	-1.20962	1.63915	-1.20962	-1.20962	0.0951463	3.31446	0.0344037	0.60014
LOC118567765	-0.295875	-1.52003	0.790419	-0.447248	-2.78397	0.215735	-1.40503	-2.78397	0.337468	2.35075	0.0344177	0.60014
Ganc	-2.41365	0.90581	1.58963	1.27272	0.265191	0.439691	0.217818	1.33459	0.576411	2.3198	0.0344604	0.60014
Il12rb1	0	1.98196	3.23599	1.11445	1.30362	3.18326	2.6213	1.51124	0.291162	2.35003	0.0344677	0.60014
Gm26871	-3.00611	-4.56627	-4.02483	-2.07388	-2.3512	-2.16654	-1.34764	-0.544482	1.24786	2.29423	0.0345542	0.601208
1700113H08Rik	3.3313	1.36505	2.46202	0	3.84034	2.0586	0	1.51099	0.310849	2.38728	0.0345834	0.601279
Dglucy	-0.632923	-3.96068	0.237037	-4.10328	0.615082	-1.36146	-0.75701	-1.08892	1.45383	2.29288	0.0346537	0.601345
Rgl3	-2.16319	-4.16715	-0.960187	-3.04802	-0.397417	-4.16715	-1.40686	-4.16715	0.410449	2.38614	0.0346602	0.601345
Cndp1	-0.807682	-3.86118	-1.62113	-3.86118	-2.91234	-2.17213	-1.08083	-2.48966	0.318433	2.34698	0.0346814	0.601345
Cfap65	-4.38763	-1.75172	-2.21585	-0.354807	-1.71969	-1.97532	-1.47991	-4.39192	1.11785	2.29243	0.0346877	0.601345
Avp	-1.467	-2.39129	0.297126	-1.35703	-1.65369	-0.941758	0.478792	-2.12394	3.52204	2.29126	0.0347741	0.601849
Tacc3	1.43827	0.0324962	0.0517003	1.20266	-0.108206	-3.37044	-1.54152	0.286424	1.41819	2.29125	0.0347753	0.601849
Asic5	-3.43898	-3.43898	-3.43898	-2.24012	-3.43898	-2.20547	-3.43898	-3.43898	0.132405	2.61565	0.0347921	0.601849
Ckmt2	-3.28924	-3.28924	-1.12807	-2.09035	-3.28924	-3.28924	-2.00156	-1.85891	0.17324	2.43463	0.0348678	0.602722
Gm36841	0	0	2.23349	1.19884	2.57924	0	0	0	0.113217	2.61307	0.034934	0.603431
Cdc14a	-2.59259	-6.12044	-2.44735	-1.60659	-1.77035	-2.2852	-0.901404	-4.74303	1.15283	2.31192	0.0350311	0.60435
Mettl24	0	0	0	0	0	1.11335	1.6925	2.99166	0.116457	2.6112	0.0350377	0.60435
Gm14858	2.4606	0	0	1.19889	1.30562	2.08864	0	2.55809	0.167652	2.64978	0.03513	0.605506
Gm8802	2.05913	1.3652	3.24114	3.19308	1.30767	3.5904	2.62466	1.42879	0.377934	2.31009	0.0351655	0.605682
Stk35	0.399977	0.260079	-1.29909	1.4904	1.43673	2.07347	-0.303922	0.956642	0.887467	2.2847	0.0352658	0.606973
Eef1akmt4-ece2	0.520124	-0.958341	0.105937	0.535224	1.06528	-0.18528	0.694968	-0.937498	1.98089	2.28419	0.0353044	0.6072
Hcn3	1.41988	0.765702	3.50357	2.74277	-0.412463	3.18564	2.55859	2.20085	0.799761	2.28281	0.0354081	0.608239
Ddx11	1.42825	-1.2102	2.46882	-1.2102	1.07999	0.855412	-1.2102	-1.2102	0.238031	2.42621	0.0354162	0.608239
Gm46948	0	0	0	0	0	1.095	2.92978	0	0.0986343	2.78059	0.035441	0.608239
Duxbl1	2.95711	3.22388	2.23013	-0.198792	2.11884	-0.171209	1.41929	0.880103	0.661063	2.28131	0.0355221	0.608514
Frmd3	-1.4708	-0.352786	-0.066221	0.599288	1.09082	-1.27819	1.1513	0.473438	0.983649	2.28088	0.035555	0.608514
Tmem70	-3.20597	-1.94199	-1.24135	0.0590236	0.20945	-2.09072	-1.33216	-1.83438	0.34097	2.3048	0.0355556	0.608514
Begain	-0.145952	0.928381	-0.620449	0.532987	-0.331663	0.990168	0.285243	0.0231906	5.21674	2.28061	0.0355754	0.608514
Gp1ba	-2.22294	0.253956	0.390586	-0.451097	-2.22294	-0.278729	-2.22294	-2.22294	0.190452	2.56729	0.0355841	0.608514
Itsn1	-0.236005	0.289384	-0.0102008	-0.108776	-1.52314	0.105063	-0.0207071	-0.646242	5.10249	2.27817	0.0357614	0.609738
Gm30446	0	0	0	3.32377	0	0	0	0	0.115964	3.12044	0.0357614	0.609738
Ddx58	-1.34815	2.07476	1.93856	-0.146694	0.445436	0.340295	0.0173594	-0.0147943	0.269807	2.32949	0.0357694	0.609738
Gm9288	0.519044	-0.0425594	-1.43384	-0.320052	-1.43384	1.03712	-0.55352	1.77748	0.214708	2.85273	0.0358	0.609738
Xpnpep2	0.986526	0.107202	-2.03923	1.26399	-0.735171	-0.761129	-2.03923	-2.03923	0.261525	2.36951	0.0358006	0.609738
Nxpe2	1.37095	0	0	2.85162	2.25946	0	1.27502	0	0.152425	2.49131	0.0358085	0.609738
Guca1a	0	0	0	1.11309	1.38255	1.11364	2.69769	2.04632	0.14523	2.41909	0.035887	0.610548
Gm34069	0	0	0	1.30499	1.78746	0	2.17284	0	0.094878	2.59565	0.0359093	0.610548
Rspo4	1.04404	1.50473	-1.09461	-1.09461	0.899316	-1.09461	0.472686	-1.09461	0.158555	2.49167	0.0359557	0.610548
Gm51716	4.013	4.01609	4.1715	3.07071	2.9595	2.76323	3.04103	3.46318	1.31814	2.2756	0.0359581	0.610548
Henmt1	-3.06409	-1.67265	-3.06409	-1.79325	-2.11812	-1.83071	-3.06409	-1.69307	0.158636	2.36499	0.0361172	0.61241
Col22a1	-1.43595	1.61622	-1.43595	-1.43595	0.628282	-1.43595	-1.43595	-1.43595	0.143137	2.5912	0.0361634	0.61241
Adgrl4	2.3656	2.49276	2.58387	0	0.946781	1.68745	0	2.06526	0.199002	3.03013	0.0362217	0.61241
Gpat3	3.5559	3.58509	3.32531	4.7423	4.23892	4.42321	3.11646	2.54542	0.836401	2.29589	0.0362221	0.61241
Gm3809	-1.0657	-1.09781	-0.705024	-1.54093	-1.12476	-1.98347	-2.0008	-1.17306	1.51922	2.27199	0.036237	0.61241
Zdhhc18	0.853299	-1.45804	1.0939	-0.867754	-1.26145	-1.60807	0.569767	-1.22402	0.415891	2.27134	0.0362876	0.61241
Ebf2	0.725265	-3.16034	-3.16034	0.980408	-0.189726	-0.406994	0.724816	-1.73424	0.580679	2.32459	0.0362888	0.61241
H3c4	-0.665698	0.193146	-3.05737	0.409798	-1.36254	-0.779798	0.305739	0.830164	0.520007	2.29498	0.0362907	0.61241
Gm34272	0	2.89326	1.89854	0	0.945887	2.2679	0.879195	0	0.155016	3.36861	0.0362979	0.61241
Gm31862	-2.03691	-2.03691	-2.03691	-0.733017	-2.03691	1.18715	-0.340183	-2.03691	0.168485	2.48206	0.0363881	0.613497
Mlkl	-0.0449123	0.13289	-1.43399	-1.43399	-1.43399	1.69054	-1.43399	-1.43399	0.159714	2.47894	0.0365857	0.616396
Robo1	0.0481139	1.24206	-0.739593	0.193557	-0.919059	-4.01478	0.0403303	-1.81681	2.93047	2.26623	0.0366854	0.617241
Nes	-1.62002	-2.99087	-1.45881	-2.04071	-1.43547	-2.04259	-1.40446	-3.47531	1.01448	2.26592	0.0367104	0.617241
Gm38699	4.2329	4.98352	2.94221	4.18467	3.9161	4.69897	3.60302	5.15052	1.09671	2.28942	0.0367144	0.617241
Ckap2l	0	1.38413	0	1.19883	0	0	0	2.83279	0.10402	2.58087	0.036759	0.617241
Gm8919	0.0632633	-1.7496	0.717138	-0.548206	-1.7496	0.326451	-1.7496	-1.7496	0.148258	2.76566	0.0367648	0.617241
Gm8522	0.463927	0.764863	0.177656	-0.64016	-0.102344	-0.431905	0.162835	-1.94976	1.19672	2.26404	0.0368581	0.618375
Gm8893	-0.445185	-3.26277	-0.837991	-0.748204	-0.246831	-1.04651	0.234429	-3.26277	0.413609	2.61068	0.0369217	0.619008
Gm50589	-1.87033	-1.87033	-1.87033	-1.87033	-0.117616	-1.87033	0.0788935	-1.87033	0.0985298	2.59844	0.0370898	0.621168
Trpv4	2.68212	1.38414	0	0	0.944582	0	0	0	0.0975287	2.575	0.0371025	0.621168
Gm41795	2.52502	0	0	0	0	0	1.56634	0	0.0879834	2.74527	0.0372032	0.621988
Gm51556	-0.444557	-2.44926	-0.225384	0.837847	-0.0170701	-2.44926	0.83089	0.364328	0.369836	2.31228	0.0372034	0.621988
Atp7b	1.30704	2.6001	0	3.06522	0	1.36933	0.879886	1.43026	0.190779	2.34846	0.0372986	0.623145
Taf13	-0.594045	-0.306764	-0.477023	-0.340538	-0.632712	-0.0585443	0.50337	-0.180483	3.0226	2.25712	0.0374066	0.623682
Chrnb1	1.88188	-0.169569	1.62392	-0.233776	-1.43274	0.255534	0.522354	-1.43274	0.256949	2.30947	0.037415	0.623682
Gm46210	-1.65199	-2.10356	-2.35705	-2.41854	-0.609279	-2.0893	-0.483411	-1.69321	0.530449	2.25683	0.0374303	0.623682
Gm34978	-1.54158	-0.945722	0.0369841	-2.9115	-0.185034	-1.08389	-2.9115	-1.57813	0.272454	2.30921	0.037435	0.623682
Ttll6	0.111395	0.289037	2.33018	-1.09494	0.145402	-1.09494	0.843262	-1.09494	0.179433	2.34567	0.0375022	0.624368
4931414P19Rik	-3.16672	-0.935684	0.456958	0.855414	-0.863642	0.26132	1.03855	-3.16672	0.600793	2.30741	0.0375717	0.62489
LOC118567373	0	0	0	1.20138	0	0	3.55582	0	0.137865	2.73784	0.0375858	0.62489
Tnxb	-2.45856	-1.4101	-0.130876	-1.95264	0.299159	-0.843253	-3.05678	-3.18429	1.6598	2.25447	0.037619	0.625009
Gk5	1.35181	0.36776	0.0933372	0.86484	-0.0248237	-2.57319	-1.68202	-2.57319	0.4189	2.30592	0.0376846	0.625212
Irx1	-0.69264	1.43232	-1.89925	-1.89925	-0.952358	0.202213	0.00781947	-1.89925	0.204894	2.34291	0.0377043	0.625212
Etv2	0	1.36501	3.6793	1.11379	1.79189	0	2.42896	1.43017	0.214621	2.34245	0.037738	0.625212
Tbxas1	0.0817204	-0.402114	-0.10337	-2.45455	1.3561	-2.42849	0.577805	-1.62673	0.768462	2.25284	0.0377506	0.625212
Map3k7cl	-3.11017	0.503251	-3.11017	-3.11017	-0.597765	-3.11017	-1.15437	-1.01354	0.280138	2.39163	0.0377618	0.625212
Gpr143	0	0	0	1.83163	0	0	0	2.69959	0.0946271	2.74424	0.0378197	0.625407
Clmp	-0.983824	-1.30457	-2.19636	0.413035	-3.24703	0.485533	-2.59472	-0.133189	1.33033	2.2519	0.0378259	0.625407
Myo19	2.67494	2.56428	-1.10835	2.90581	2.0728	0.0137156	0.543616	0.914431	0.500333	2.2741	0.0379053	0.626263
Gm34589	0	0	2.66631	1.11298	1.44709	0	1.93913	1.37093	0.135188	2.43689	0.03793	0.626263
Slc12a7	-0.933973	-1.10121	-0.63201	-1.29114	0.759375	0.978296	-0.778373	-5.02697	1.3997	2.27334	0.0379656	0.626417
Tsnaxip1	0.633744	-1.61931	0.200685	-0.602243	0.0808829	-0.523691	0.0659938	-5.1069	1.47319	2.27301	0.0379916	0.626417
Olfr1417	0.11018	-2.29303	-0.942937	-1.17869	-2.29303	-0.0799761	1.40349	-0.781616	0.277695	2.94984	0.038028	0.626443
Gm5914	-0.311797	-2.37375	1.02471	-0.158864	-0.995471	-2.37375	0.256149	-0.277107	0.294419	2.30121	0.0380456	0.626443
Mlph	0.0298393	-1.27722	0.956887	-1.27722	-0.331895	1.08293	-1.27722	-1.27722	0.129246	2.38597	0.0381607	0.627908
H3c3	-0.441371	0.225379	-2.83207	0.221503	-1.59784	-1.02718	0.240184	0.920385	0.441386	2.26998	0.0382321	0.62865
Snx24	-2.51018	-1.42659	-1.66605	-0.76226	-1.11139	-1.90605	-0.839382	-1.56443	1.75066	2.24644	0.0382699	0.62884
Zfp568	-3.40959	-0.283551	-3.2958	-0.256904	-1.59102	-3.50482	-1.95151	-0.884991	0.73415	2.2458	0.0383222	0.629267
Gm19293	-3.75963	-2.49634	-1.85251	-2.64536	-1.70113	-1.95745	-1.30157	-3.75963	0.269182	2.34682	0.0384531	0.630501
Wdfy1	0.953393	1.161	0.818808	1.19045	0.901678	0.710488	1.69281	0.429068	3.51515	2.24381	0.0384853	0.630501
Rbm33	-0.0252127	0.560155	0.195547	0.474304	0.382424	0.219333	-0.121722	-1.9796	2.96242	2.24376	0.0384893	0.630501
Dclre1a	-1.59933	-2.00114	0.602265	-1.77846	-1.74565	-0.659059	-1.52996	-3.59147	1.36974	2.2436	0.0385027	0.630501
Oas2	3.67271	0	0	0	0	2.84586	0	0	0.199439	2.71646	0.038711	0.633223
Nupl2	-2.78095	-0.173987	0.433809	0.0234902	1.51705	0.807791	0.121447	0.152212	0.581184	2.26387	0.0387218	0.633223
Llgl2	-1.20708	-1.49418	-3.60005	0.0215131	0.599942	0.742198	-0.644867	-3.60005	0.666809	2.29201	0.0387601	0.633416
Chrm4	-0.0149706	-1.19946	0.0692093	-0.15109	-2.65322	-0.967778	-2.94227	-0.25308	0.744903	2.23995	0.0388042	0.633705
Gpr153	0.106835	0.75471	2.60956	1.06125	-0.313729	0.931389	1.88475	2.65276	0.43808	2.23942	0.0388476	0.633982
Clec4a2	-0.0447206	-1.2693	2.38485	2.21839	2.48875	3.50624	3.69536	3.08224	0.848661	2.26182	0.0388874	0.634032
Ect2	0	0	0	0	2.05093	2.39317	3.67131	0	0.186336	2.54511	0.0389037	0.634032
Micall2	4.09145	2.93871	1.99064	3.27112	3.63426	2.49393	3.08979	0	0.525934	2.28891	0.0390038	0.634579
Slc25a23	-0.144701	0.365125	-0.173062	0.295772	0.0817847	1.24015	0.202821	-0.364086	3.87411	2.23718	0.0390341	0.634579
Col27a1	-1.43405	-1.43405	-0.379163	1.68163	-1.43405	-0.154873	-0.554792	-0.0630325	0.158006	2.32507	0.0390371	0.634579
Itgae	-3.60036	-1.29227	-1.05968	-0.459568	-0.466073	0.156769	-3.60036	-2.09987	0.463449	2.28841	0.0390432	0.634579
Ddr2	0.626692	-1.36197	-1.09831	-2.49203	-0.222849	1.20241	-0.685155	-1.48924	1.72817	2.23551	0.0391731	0.636217
Gm14082	-0.372826	-2.42655	0.654232	-1.22507	-1.47755	-0.0279909	-0.552931	1.28792	0.328685	2.40629	0.0391972	0.636217
Arhgap27	0.689115	-1.3345	-1.3345	2.17769	2.87387	2.58092	2.44832	0.826952	0.556661	2.28337	0.0394435	0.639779
Ddx31	3.67519	2.23354	3.35871	1.29057	3.1665	3.39427	4.11471	1.37454	0.549598	2.25449	0.0394863	0.639779
Cp	1.08577	-4.00303	0.991439	-0.0481715	1.24773	0.582324	0.918007	0.661108	2.94005	2.23148	0.0395115	0.639779
Hsd17b6	-5.08175	-5.08175	-5.08175	-5.08175	-5.08175	-5.08175	-5.08175	-5.08175	0.242563	3.02735	0.0395533	0.639779
Gvin1	-1.27748	-1.27748	-1.27748	-1.27748	-1.27748	-1.27748	1.05162	-1.27748	0.0770017	2.70045	0.039577	0.639779
Gvin2	-1.27748	-1.27748	-1.27748	-1.27748	-1.27748	-1.27748	1.05162	-1.27748	0.0770017	2.70045	0.039577	0.639779
Adamts13	-0.237896	-2.82596	-0.857335	-2.82596	-1.58788	1.42169	-0.48148	-2.82596	0.360207	2.31765	0.0396062	0.639819
C7	-1.53338	-2.58892	0.411369	-0.295322	1.18325	-0.141994	0.24186	-3.96949	0.883992	2.2525	0.03965	0.640095
Ino80dos	-2.30052	-0.909107	-2.30052	0.00350239	-2.30052	-2.30052	-0.937705	0.213024	0.166642	3.35303	0.0397142	0.64053
Pbk	0.0975306	-1.20954	1.02254	-1.20954	-1.20954	-1.20954	-1.20954	-1.20954	0.0789403	2.59835	0.0397409	0.64053
Gm15448	0	0	0	0	0	3.25858	0	0	0.116092	3.02251	0.0397628	0.64053
Tlr6	0.199068	-1.10763	2.31812	2.23491	0.988719	3.34515	1.96189	0.26572	0.483268	2.25088	0.039784	0.64053
Gm51425	2.0971	0	2.23261	0	0	0	0.877823	0	0.0913922	2.5302	0.0398363	0.640878
Pax9	-1.3506	-1.3506	-1.3506	-1.3506	1.5278	-1.3506	-1.3506	-1.3506	0.101484	2.69532	0.0398591	0.640878
Mapk15	-1.52682	2.49274	-0.27637	-1.29855	0.310684	0.221816	1.24394	0.193812	1.84804	2.22687	0.039902	0.641137
Izumo1	0	0	2.45375	0	1.31745	0	0	0	0.0760396	2.69206	0.0400392	0.64291
Lrrc43	-1.18525	-2.55557	0.250225	-2.55557	-2.55557	-1.27709	0.54225	-2.55557	0.221762	2.35656	0.0403019	0.645476
Cxcl3	1.2695	1.39153	2.87118	0	0	1.37105	0.878635	0	0.12794	2.63623	0.0403292	0.645476
Abca4	-0.991582	-3.04522	0.14506	-1.27443	0.40841	-1.94772	-1.39433	-3.04522	0.34142	2.27221	0.0403432	0.645476
Dok7	1.2808	-2.15353	-0.728562	1.04031	1.39938	-2.15353	-0.775312	0.953078	0.403916	2.27207	0.0403544	0.645476
Gm2026	0	2.90515	1.05342	0	0	0	0	0	0.0889203	2.68638	0.0403552	0.645476
Cyp4f18	1.95274	1.26152	0	2.81463	0	0	0	0	0.119245	2.52198	0.0403608	0.645476
Fam221a	-2.13897	-4.0044	-1.47987	-2.1239	0.713924	-0.654224	0.397776	-0.51722	1.94215	2.2212	0.0403878	0.645476
Ano4	-4.80268	-0.065239	-2.6942	-2.76438	-2.4138	-1.22052	-1.41499	-1.39955	1.93143	2.22026	0.0404693	0.646055
Gprc5c	0.369329	1.55231	2.26429	-1.67768	1.89571	1.06541	0.211711	1.95339	0.49891	2.24258	0.040478	0.646055
Fam184b	3.26942	1.39116	2.64659	1.11422	1.31648	1.09683	2.75249	1.37066	0.263348	2.36493	0.0406758	0.648529
Npepl1	-2.00351	-4.24464	-1.06409	0.00802755	-3.01053	-0.685215	-1.45174	-1.81975	1.22529	2.21774	0.0406871	0.648529
Dnah17	-1.35187	-1.35187	-1.35187	-1.35187	1.08047	-1.35187	-1.35187	-1.35187	0.0825317	2.67936	0.0407502	0.649102
Adgrg5	0	0	0	1.30481	2.58551	0	1.28962	0	0.105679	2.51377	0.0408913	0.650502
Hdhd5	0.802064	-0.482164	1.46564	2.73796	2.47202	2.29874	2.69685	3.60669	1.05493	2.2144	0.0409776	0.650502
Mapk4	-2.50599	1.1522	-0.0233036	-0.369417	0.432908	0.390737	-0.472436	-0.673219	3.34296	2.21397	0.0410155	0.650502
Gm9523	2.5796	2.0287	1.42112	2.4636	2.89412	2.31106	3.49284	3.84239	0.443136	2.23615	0.0410235	0.650502
Cep72	-2.50004	-4.54422	-1.88038	-4.54422	-1.08313	-2.33511	-0.760222	0.758026	0.649687	2.26383	0.0410324	0.650502
LOC118568473	0	2.50873	0	0	1.31891	2.37094	1.36192	0	0.136474	2.41276	0.04105	0.650502
H3c13	-1.82658	-1.70517	-3.09645	-1.98266	-3.09645	-1.29449	-1.39821	-0.626782	0.215052	2.35696	0.0410538	0.650502
Zfp57	-1.55557	-1.55797	-0.76951	0.28231	-1.59454	-0.891772	1.90688	-0.144473	0.45276	2.2133	0.0410745	0.650502
Rad54b	0.97011	-0.859241	-0.343143	1.36656	1.07339	-2.2489	0.229062	0.267676	0.417387	2.3313	0.041087	0.650502
Gm36722	0	0	0	2.45358	1.31698	0	1.3606	0	0.0957649	2.60463	0.0411107	0.650502
Otop1	1.30706	2.02704	1.83211	0	0	0	0	2.51329	0.126547	3.43239	0.0411625	0.650502
Krt14	1.3885	3.05821	0	3.06361	1.30489	1.09629	0	1.33293	0.209175	2.29761	0.0411826	0.650502
Jhy	-0.83011	-2.67534	-4.27293	-2.1125	-3.65417	-1.43425	-2.1938	-1.01939	1.01019	2.21197	0.0411913	0.650502
LOC108168367	1.30706	0	0	0	1.31937	1.09522	0	2.78538	0.115726	2.70257	0.0413061	0.651884
Gbp2b	-1.09301	-1.09301	-1.09301	-1.09301	1.13436	-1.09301	-1.09301	-1.09301	0.0677858	3.15137	0.0414165	0.65212
Lrg1	0.115002	-1.9487	0.271579	-1.9487	-1.9487	-1.9487	-1.9487	-1.9487	0.111726	2.75572	0.0414195	0.65212
Noct	-2.03787	-0.746699	-0.864386	-2.27084	-1.36008	0.635136	-1.03922	-2.77521	0.651317	2.20932	0.0414239	0.65212
Mei4	-0.550672	-2.55624	-2.55624	-0.653457	-0.308497	-2.55624	-0.857067	0.612375	0.245978	2.29403	0.0414707	0.65212
Trim7	-1.47346	-0.413553	1.98986	1.51915	-1.15996	1.72816	0.345671	-1.38772	1.05038	2.2087	0.0414789	0.65212
Gm14114	1.24435	-2.23183	1.27451	1.33252	1.65536	-1.00325	1.22412	-2.23183	0.545256	2.25841	0.0414844	0.65212
Jak3	-0.817548	0.542291	0.220203	-0.0560773	0.349489	-0.625835	-1.11622	-3.94913	0.825964	2.22928	0.0416142	0.65373
Gm18285	0	0	0	2.52976	0	1.35965	0	1.332	0.099323	2.50486	0.0417159	0.654124
Bbof1	-1.09749	-1.23476	-1.1386	-2.33373	-1.82304	-1.02557	-1.0252	-5.09251	2.62417	2.20601	0.0417176	0.654124
Zim1	-1.43116	-0.0400059	-0.374419	-0.232195	2.52563	0.628442	0.731315	-1.43116	0.263711	2.2556	0.0417212	0.654124
Klk1b16	-2.32229	-2.32229	-0.216245	-0.355047	-0.87537	-2.32229	-2.32229	-2.32229	0.130023	2.40054	0.0419331	0.657016
Rbm44	1.39627	2.8302	1.59837	2.28171	2.88704	2.88391	0	2.04714	0.290101	2.25213	0.0420141	0.657843
Gm39547	1.30707	0	0	0	0	0	1.94905	2.17225	0.0946497	2.49636	0.0420408	0.657843
Gm40527	2.03787	1.39124	1.90722	1.8318	0	1.0965	2.00242	3.25209	0.229785	2.25124	0.0420897	0.658178
Gm34128	-0.25871	0.949637	-2.24911	-0.477628	-1.25644	-1.34937	-1.93247	0.0880226	0.506738	2.20128	0.0421401	0.658535
Ttc14	-2.04319	-0.0950201	-1.88284	-1.90374	-1.33856	-1.79102	-1.16924	-2.4313	3.36124	2.20087	0.0421774	0.658688
Coro6	-2.6381	0.0463172	-0.804703	1.03501	1.88655	-0.423678	-0.0446864	-1.31725	1.07567	2.20027	0.0422314	0.658992
Nckap5l	1.6483	3.45543	3.48077	3.90849	0.998642	2.60105	2.7729	3.54828	1.49387	2.20004	0.0422519	0.658992
Lef1	1.12418	-3.61383	1.19247	1.57781	0.049414	1.08972	0.822891	0.492043	2.67124	2.19971	0.0422819	0.65903
Arx	1.96889	1.69073	1.68557	0.0473004	2.68326	0.503795	2.21598	3.78334	0.613647	2.1994	0.0423098	0.659036
LOC102638047	-4.51325	0.303252	-0.426416	-2.38295	-0.528185	0.100231	-0.480967	-4.51325	0.932575	2.24802	0.0423651	0.659142
Rab29	0.556678	-2.88179	0.858001	0.18057	-0.210556	-1.36523	0.391512	-0.93217	1.06488	2.1986	0.0423818	0.659142
Capn15	1.83302	0.133463	2.89223	2.16881	-1.35165	2.67169	2.62259	0.43162	1.52443	2.19841	0.0423992	0.659142
Gm39676	-1.27582	0.158305	1.80571	2.3552	0.524325	-0.176876	1.06885	2.14998	0.360854	2.21986	0.0424384	0.659324
E130304I02Rik	0	0	0	0	2.227	0	0	0	0.0579298	2.96195	0.0424905	0.659385
Fam120a	1.39003	0.840446	0.909104	1.34503	1.56225	1.52315	2.38784	1.0769	2.58395	2.19704	0.0425226	0.659385
Prkd1	2.24189	1.10225	0.842806	1.84357	-0.494311	3.14023	3.08211	3.59744	1.15122	2.19702	0.042525	0.659385
Gm2115	-1.34961	0.0153657	1.06815	-1.34961	-1.34961	1.41979	-1.34961	0.163522	0.162522	2.99793	0.0426258	0.660495
Serpina3c	0	1.87878	2.23264	0	1.31992	0	0	0	0.0921948	2.48711	0.0426654	0.660495
Slc25a26	-0.409967	0.730398	-0.662037	-0.673129	0.483267	-0.238047	-0.545773	-1.07137	2.29834	2.19531	0.0426802	0.660495
Hspd1-ps2	3.009	1.43589	0	2.69327	1.45072	1.09681	1.99272	2.84914	0.262219	2.24404	0.0427069	0.660495
LOC102633548	-2.61913	0.646501	0.00753896	-0.911982	0.477488	0.62535	0.236228	-2.61913	0.404876	2.2426	0.0428311	0.661987
n-R5s115	0.884189	0.0814528	-1.08913	-1.96586	1.20739	0.687217	1.09572	-1.06592	0.700723	2.19332	0.042861	0.662022
Rreb1	-4.05149	-2.82722	-1.1207	0.348418	0.352564	-0.891746	0.913532	-1.81656	2.02387	2.19263	0.0429245	0.66237
Itgbl1	-0.936436	-0.153958	-1.03414	-0.192501	0.156869	-0.609679	0.962719	-0.441403	2.50337	2.19195	0.0429871	0.66237
Tex21	2.52937	1.91518	1.82472	0.987583	-2.06566	-0.722744	0.350177	-0.0419328	0.57602	2.21365	0.0429897	0.66237
Gm2961	0	2.58	0	0	1.31592	2.50851	0	1.37024	0.14378	2.78465	0.0430096	0.66237
Myh4	-3.08824	-3.77571	-0.89094	-2.53757	-1.64563	-5.19976	-2.00691	-1.68281	0.713328	2.21299	0.0430495	0.66237
Frem2	-1.34867	1.22073	0.613078	-0.234747	-1.34867	1.92306	-0.468098	0.696962	0.228992	2.23996	0.0430603	0.66237
Gm49668	1.38807	1.26309	1.59744	1.70008	1.74399	1.09669	3.97054	1.37061	0.248821	2.37353	0.0431034	0.66237
Slc25a15	0.15146	-0.677232	1.46014	1.69892	1.31732	0.891302	2.48813	-0.525778	0.56667	2.19066	0.0431048	0.66237
Thnsl2	1.36933	2.38038	3.91687	2.84304	2.05027	1.6895	1.3674	2.69305	0.345527	2.21204	0.0431342	0.662396
Myo1g	0	1.26069	0	0	2.04563	0	0	0	0.0633034	2.63369	0.0434207	0.664367
Gm572	0.175282	0.297251	-1.09425	0.107129	-1.09425	0.00122277	1.52093	-1.09425	0.136494	2.27037	0.0434269	0.664367
Egr4	1.95125	1.26808	2.58892	1.98942	2.58963	3.83016	2.78725	2.82979	0.393901	2.20871	0.0434336	0.664367
Fbp2	-2.22292	-0.133546	-2.22292	-2.22292	-0.409576	-2.22292	-0.106924	0.384342	0.188358	2.56726	0.0434692	0.664367
Tasp1	1.00687	0.462894	2.68455	1.65678	0.29897	0.649575	1.5578	0.206447	4.28351	2.18655	0.0434836	0.664367
LOC115487798	-0.141877	-0.520387	-1.95638	-0.256276	-1.00865	1.36862	0.614238	-1.95638	0.250093	2.23466	0.0435244	0.664367
Snord3b4	-0.141877	-0.520387	-1.95638	-0.256276	-1.00865	1.36862	0.614238	-1.95638	0.250093	2.23466	0.0435244	0.664367
Nek10	-1.14571	0.860107	0.0466048	1.61658	0.508916	-0.550529	-0.134627	-3.0913	1.3686	2.18601	0.0435339	0.664367
A4galt	3.92736	3.7792	3.58291	2.8962	1.32338	3.25598	3.62732	4.88405	1.34879	2.18597	0.043538	0.664367
Dse	2.9597	0	3.5776	2.65791	2.64385	1.35504	3.97025	0	0.411291	2.26898	0.0435445	0.664367
Trdn	-2.54837	-1.53847	-0.242575	-3.85491	0.68513	-0.513609	-0.713537	-0.47767	0.638664	2.20723	0.0435678	0.664367
Aoc2	-2.89317	-2.89317	-1.46488	-2.89317	-2.89317	-1.79805	-2.89317	-2.89317	0.108307	2.5696	0.0436828	0.665505
Serpina3n	-0.627119	1.36333	0.0874739	1.51664	2.15606	1.54722	-1.90045	0.527421	0.492965	2.2058	0.043698	0.665505
Ypel1	2.45669	2.40706	1.49724	1.63792	1.22465	3.82702	1.91247	2.38326	1.50715	2.18336	0.0437804	0.665834
Lnp1	-2.17574	0.882845	-2.17574	0.262745	1.01964	-0.0859984	0.370046	1.94774	0.433306	2.23141	0.0438107	0.665834
Bcl2l14	-0.498902	-1.80597	0.427037	-1.80597	-1.80597	-0.692789	-1.80597	-1.80597	0.10117	2.66274	0.0438484	0.665834
Gm12359	-0.219442	-0.105882	-0.0168938	-2.56275	-2.56275	-1.4485	-2.56275	-1.19227	0.209838	2.45953	0.043904	0.665834
Topaz1	2.82866	0	2.3902	1.20138	0	0	0	0	0.128541	2.4691	0.0439098	0.665834
Clec1a	2.03864	0	0	2.61301	0	1.11331	0	0	0.113336	2.46851	0.0439507	0.665834
Ap3s1	-1.17104	-0.0563882	-0.443865	-0.349351	-0.420281	-0.705645	-0.0383885	-0.0756643	4.03562	2.18094	0.0440067	0.665834
Gm34299	-1.46344	-2.83287	-2.83287	-1.71878	0.922687	0.0213432	-0.609527	-0.816842	0.340828	2.22882	0.0440406	0.665834
Mrps24	-0.0298391	0.168534	-0.171331	0.279655	0.75714	0.124084	0.0869267	0.331243	5.14403	2.18025	0.0440713	0.665834
Zpbp	2.80372	0.0392847	1.73484	-0.0764319	1.10822	-0.244008	-0.212131	1.10225	0.374919	2.17968	0.0441253	0.665834
Lancl3	0.0676389	-2.3232	1.13043	1.22684	-0.315147	1.00128	0.56427	-0.302361	0.450384	2.26044	0.0441596	0.665834
Sntb2	0.780244	-1.30373	-0.0724716	-1.36791	-2.56687	-1.2887	-2.56687	-0.520506	0.254223	2.22733	0.0441738	0.665834
Plekha2	3.63664	1.80459	3.64773	3.55412	-0.101076	2.72785	3.06239	1.99717	1.04201	2.17915	0.0441744	0.665834
Tyrp1	0	0	0	0	0	0	3.01535	1.4306	0.11032	2.62083	0.0442066	0.665834
Gm32187	1.91751	0	0	0	3.06869	1.37019	0.879258	1.3703	0.158163	2.37444	0.044225	0.665834
F11r	-0.867609	-1.4073	0.31301	-0.660041	0.474825	0.814109	0.0482418	0.452731	1.09737	2.1786	0.0442269	0.665834
Col9a1	0.29317	1.05192	-1.09535	2.09321	-0.148411	0.000922385	0.93031	-1.09535	0.207222	2.22613	0.0442803	0.665834
Gm5732	0	0	0	0	2.51588	1.78678	0.878025	0	0.10021	3.4537	0.0443071	0.665834
Gm6369	1.17789	0.0525637	-1.2101	1.92076	-1.2101	0.158752	0.487994	0.161101	0.210124	2.56393	0.0443146	0.665834
Tmc7	0.00793453	-3.06816	-2.55193	-2.73686	-1.51787	-1.52452	-1.67019	-0.496922	0.686756	2.17749	0.0443316	0.665834
Tmprss6	0	0	0	0	2.04921	3.39391	0	0	0.142705	2.61835	0.0443599	0.665834
Prkg2	0	1.38408	3.1468	0	1.98238	0	0	0	0.12809	2.46265	0.0443646	0.665834
Gm50594	0	0	0	1.20141	2.04197	0	2.2961	3.24562	0.173325	2.36811	0.044374	0.665834
H3c2	-0.665593	0.193154	-3.05722	0.564975	-1.36248	-0.77967	0.217041	0.696839	0.515221	2.19797	0.0444149	0.665834
St8sia5	0.243847	-1.07655	-0.510684	1.91534	-0.381097	1.66475	-0.155842	-0.922188	0.48792	2.17639	0.044435	0.665834
Atp4a	0	0	1.83212	1.19885	0	0	1.94555	2.60754	0.128139	2.96354	0.0444427	0.665834
Mettl4	4.48035	3.89064	3.68643	3.60555	2.32516	2.41675	3.69683	2.34601	1.32123	2.17571	0.0444993	0.666087
Ms4a7	1.02924	-1.09347	-1.09347	-1.09347	-1.09347	-1.09347	0.855462	-1.09347	0.0919998	2.46039	0.0445248	0.666087
Proca1	-2.59839	-2.54236	-3.80544	-2.53533	-1.36593	-1.72751	-2.57809	-3.80544	0.248343	2.22321	0.044543	0.666087
Cd84	0.910304	1.41359	-1.09537	-1.09537	1.68168	0.000915609	1.18277	-1.09537	0.208944	2.25491	0.0447549	0.668576
Gm16010	2.65796	0	0	1.11295	2.58377	0	0	0	0.132866	2.45702	0.0447653	0.668576
Ncf4	-3.19418	-1.75794	-3.19418	-1.3624	-0.935645	-1.28	-1.96639	-3.19418	0.218812	2.25336	0.0448902	0.670023
Styx	1.92763	1.29679	-2.32641	0.989461	1.58715	1.21096	1.3063	0.563927	0.698627	2.19215	0.0449562	0.670192
Gm36338	1.97795	0.998952	1.60504	0.929118	-1.0966	0.018385	2.41667	-1.0966	0.302615	2.21862	0.0449575	0.670192
Armh1	0.170594	2.28498	0.318136	0.0165549	2.3637	1.50904	2.17775	-1.10075	0.377628	2.1902	0.0451386	0.672473
Igfbp3	-0.209992	-0.598526	-1.09822	-1.56755	-0.416052	-3.92563	0.136248	0.0635902	1.39159	2.16845	0.0451923	0.672553
Gm9658	-4.11278	-2.84297	-0.777797	-0.731237	-1.7999	-3.00999	-2.85349	-1.27431	0.423109	2.1894	0.0452138	0.672553
Lilra6	0	0	0	0	0	3.12298	0	0	0.105822	2.90449	0.0452764	0.672553
Gm7838	-0.57678	0.80062	0.193852	-0.103586	-0.193659	-1.94636	-0.0410901	1.9131	0.319076	2.19081	0.0452771	0.672553
Pcp4	-1.05149	-0.724403	0.161205	0.0471565	-0.836329	-0.340988	0.278814	-0.608708	4.62131	2.16749	0.0452845	0.672553
Pkp1	-1.12412	-0.972762	-1.58727	-1.03285	-2.93797	-0.773833	-2.93797	-2.93797	0.207168	2.24655	0.0454894	0.675178
2810021J22Rik	1.03086	0.0920385	0.968595	-0.451137	0.169791	1.17321	1.37983	-0.800233	2.53093	2.16479	0.0455463	0.67537
Phf7	-1.06779	-3.04503	-3.04503	-3.04503	-3.04503	-3.04503	-3.04503	-3.04503	0.120591	2.59874	0.0455922	0.67537
Ccdc190	-2.31316	-2.90165	-1.3754	-1.56365	0.329059	-1.1515	0.308832	0.402722	1.77817	2.16426	0.0455976	0.67537
Gm34414	0.0597103	-1.20962	-1.20962	-1.20962	-1.20962	1.27241	-1.20962	-1.20962	0.0944373	2.69532	0.0456152	0.67537
Gm46559	-1.84196	-1.84196	-1.84196	-0.640576	0.149373	0.83961	-1.84196	-1.84196	0.143024	2.47572	0.0456477	0.675433
Mb	-1.71932	-1.38206	-0.395755	-1.79172	-0.255818	-0.586055	-2.41539	-1.37729	1.86614	2.16282	0.0457369	0.676336
D7Ertd443e	-0.926158	-1.7458	-0.778319	-3.02425	-0.29572	0.424859	-2.7305	-3.37352	0.918893	2.16193	0.0458237	0.677201
1500026H17Rik	-0.142208	1.17448	1.42071	-1.3489	1.12986	-0.252574	0.219039	-1.3489	0.212035	2.21739	0.0459392	0.678239
Thbs4	-1.95483	-0.687317	0.720838	0.859709	0.837474	0.345009	-0.0255066	1.9093	0.385599	2.18162	0.0459506	0.678239
Gm26698	1.37078	0	1.05512	1.2014	2.50564	2.60964	1.22859	0	0.170088	2.23931	0.0461355	0.680548
Rnu1b6	1.46316	-1.34864	-1.34864	0.586161	0.443765	-1.34864	1.25328	1.12015	0.230933	2.23876	0.0461847	0.680683
Slc22a4	-4.43914	-3.07351	-0.87082	-0.429093	0.346856	-2.73965	-1.2106	-0.148622	0.808965	2.179	0.0462015	0.680683
Plekhh2	1.47469	1.52687	-3.28358	-3.40221	-0.0330901	0.82481	-0.211325	0.432775	1.62112	2.15717	0.0462898	0.681564
Polb	-0.562488	-0.331829	-0.489275	-0.499961	-1.4759	-0.295359	-0.524033	-0.0437391	4.86403	2.15672	0.0463345	0.681639
Olfr279	-0.730776	-2.62732	-1.57318	-2.62732	-2.62732	-2.62732	-1.35149	-2.62732	0.121754	2.98427	0.0463726	0.681639
Stpg3	-0.0537347	-2.49152	0.472427	-2.49152	-0.804121	-2.49152	1.65608	-2.49152	0.294871	2.28097	0.0463802	0.681639
Ctf2	-2.64688	-2.64688	-1.59216	-2.64688	-1.40628	-1.41346	-0.241202	-2.64688	0.149949	2.28039	0.0464302	0.681954
LOC115490137	0	0	0	0	2.73419	0	0	0	0.0771707	2.88045	0.0465025	0.682393
D130020L05Rik	-2.32025	-2.32025	-2.32025	-2.32025	-2.32025	-1.22562	-2.32025	-2.32025	0.0710893	2.58426	0.0465257	0.682393
Tctex1d4	-0.697386	-4.13353	0.058142	1.10546	-0.858114	0.681548	1.54654	0.732762	1.26701	2.17543	0.0465456	0.682393
Htr5b	-3.776	-0.387232	-0.862823	-1.9985	-1.17759	-1.19028	-1.16852	0.147482	0.521192	2.17283	0.046798	0.685377
Kcnh1	3.56911	3.97037	2.16795	2.54028	2.93066	3.69667	1.34952	4.35665	1.16251	2.15196	0.0468064	0.685377
Bc1	1.57908	1.86854	2.05245	1.33529	2.19191	1.5995	3.16716	2.36258	15.0729	2.15146	0.0468554	0.685485
Plcd3	0	1.36507	3.52931	3.26623	1.23916	2.39072	3.09645	2.06569	0.342662	2.19788	0.0468805	0.685485
Klf10	4.08696	4.72733	3.54615	3.31234	3.65849	2.5395	2.86044	4.36016	1.4662	2.15102	0.0468997	0.685485
Gm45574	-2.68406	-1.12423	-2.51883	-2.73604	-1.62619	-0.615703	-0.629681	-1.58458	0.6496	2.15054	0.0469475	0.685765
Gm4775	-2.48675	-1.22479	-2.48675	0.201942	-2.48675	-2.48675	-1.60761	-1.05633	0.151987	2.63913	0.0470536	0.686721
Lrrc20	-0.189933	1.62194	1.06986	0.690281	0.1746	-0.334761	0.0304785	1.70843	1.84326	2.14905	0.0470966	0.686721
Gm4371	2.13581	3.06377	2.83879	3.02082	0.948934	1.68912	2.75482	1.3337	0.324395	2.25009	0.0471259	0.686721
Tmem170	1.74179	-0.360772	0.212149	0.704888	1.30724	-0.0484788	-1.75182	-0.418184	0.313512	2.16945	0.0471276	0.686721
Prdm1	0	1.43761	2.23216	0	0	0	1.13376	0	0.0807981	2.42386	0.0472049	0.687429
Clec10a	-1.09312	-1.09312	-1.09312	1.30615	-1.09312	-1.09312	-1.09312	-1.09312	0.0735515	2.5729	0.0472722	0.687522
Ubqln4	1.0122	-0.14166	-0.489723	0.393391	0.0501216	-0.152763	-0.334376	-0.755857	2.45406	2.14719	0.0472833	0.687522
Serpinb9d	-2.98298	-2.98298	-2.98298	-2.98298	-2.03824	-1.88791	-2.98298	-2.98298	0.104117	2.45848	0.047323	0.687522
Fancb	0	1.26201	1.83233	2.5302	1.30584	2.30348	0	0	0.155913	2.47412	0.0473262	0.687522
Tmem26	2.09527	0	1.43584	0	1.31444	1.0964	3.06906	2.8892	0.219978	2.22536	0.0474066	0.687739
Gm12577	-2.50123	0.35383	-2.50123	-1.38684	0.460335	-0.422713	-1.36825	0.285765	0.283772	2.19212	0.0474283	0.687739
Zmiz1os1	1.81482	2.06644	0	2.64818	2.26401	3.44468	1.227	0	0.272859	2.22483	0.0474552	0.687739
Mab21l1	0	0	2.70951	2.24124	1.31821	1.11388	2.29788	0	0.169457	2.342	0.0474561	0.687739
C5ar1	0.162639	-0.407024	1.52808	-1.84287	1.12824	-1.84287	-1.84287	0.765118	0.268178	2.22363	0.0475668	0.688038
C4b	-0.572607	-1.44273	-1.30815	-0.363	0.43037	-0.533219	-1.48435	-0.951546	3.73764	2.14432	0.0475727	0.688038
Zc3hc1	-0.283786	-0.722379	-1.38229	-0.173988	-0.195336	-0.5343	-0.847503	-1.08969	3.70599	2.14421	0.0475833	0.688038
Nrk	-1.35049	1.55466	-1.35049	-0.237831	-1.35049	-1.35049	-1.35049	-1.35049	0.10785	2.41876	0.0475916	0.688038
Galr2	3.30957	0	1.59656	2.40213	0	1.6732	1.69203	1.33295	0.212554	2.22251	0.0476704	0.688233
Irf1	-0.560634	0.0584818	-0.419369	-4.62242	-0.210166	-0.909184	-1.02091	-0.729673	1.00086	2.16369	0.0476946	0.688233
Ptpn14	-0.908886	0.179031	-3.27867	-1.49948	0.91268	-0.646977	-0.133163	-1.85197	0.509837	2.16351	0.0477121	0.688233
Abcc1	1.49729	-2.65158	1.05979	0.174922	0.224132	-0.382255	0.535865	-0.184904	1.13548	2.14286	0.0477201	0.688233
Mroh8	-2.32782	-0.19901	0.4816	0.974525	-1.01253	-2.32782	1.01812	-0.994038	0.339094	2.1881	0.0478154	0.688563
Gm17455	0	0	0	1.27167	2.25578	0	0	0	0.0734526	2.56453	0.0478306	0.688563
Mroh7	-2.04161	1.07635	-0.565295	-2.20458	-0.864037	-1.51353	-2.27473	-0.125636	0.504541	2.14175	0.0478328	0.688563
Ggt5	0	1.2624	1.83257	2.56096	0.946565	0	2.32285	2.49648	0.188008	2.71028	0.047858	0.688563
Il17rb	1.89707	0	3.31577	2.50339	1.30541	0	0.879676	0	0.1796	2.90024	0.0479558	0.689555
Gpha2	-0.369623	-2.35107	-2.35107	-2.35107	-2.35107	-2.35107	-2.35107	-2.35107	0.0903896	2.64665	0.0479926	0.68967
Atf3	-0.586038	-1.36613	-0.885269	-2.23354	-1.09025	-3.34848	-1.47446	-0.335265	0.34541	2.15976	0.0480858	0.690595
Relb	-3.67637	0.12178	1.56493	2.5028	1.98421	2.65838	0.904831	1.3424	1.71441	2.15868	0.0481931	0.691353
E130218I03Rik	1.26943	0	0	1.76904	2.04799	1.84222	0	0	0.113913	2.48553	0.0482136	0.691353
Fxyd4	1.20581	0	1.43771	1.20138	0	2.48257	1.95075	0	0.134921	2.26	0.0482252	0.691353
Gm15495	0.433979	1.06814	0.79248	-0.800769	-0.504756	-2.5771	-0.395531	-0.0348181	0.40996	2.16695	0.0483983	0.691595
Poln	0	0	0	0	2.43149	0	0	0	0.0663899	2.84451	0.0484068	0.691595
Scn10a	0	0	0	0	2.43149	0	0	0	0.0663899	2.84451	0.0484068	0.691595
Greb1	-4.35829	-4.4078	0.810126	-0.564906	-1.46786	0.147848	-0.233256	-0.139782	1.78395	2.13606	0.0484151	0.691595
Plin1	-2.03402	-2.03402	-2.03402	-2.03402	-0.247487	-2.03402	-2.03402	-2.03402	0.073202	2.5555	0.0484415	0.691595
Fbxw10	1.92795	0.292384	1.02834	0.744608	1.69543	-1.09835	2.78369	0.410883	0.354881	2.15599	0.0484629	0.691595
Ppp1r1c	-1.91251	0.328987	-1.27538	-1.02732	-0.655854	-0.63057	1.0143	-0.939098	1.53955	2.13544	0.0484787	0.691595
Slc1a5	3.38978	1.0071	2.86002	3.37561	1.71992	2.55357	2.04307	1.76318	0.747795	2.13501	0.0485228	0.691595
Trabd2b	1.2054	0	0	0	2.27779	1.09505	1.69431	0	0.102662	2.65804	0.0485423	0.691595
Thsd7b	-1.02561	-0.369414	-0.913655	-1.89629	0.852109	0.0924977	0.180074	-3.79372	0.735067	2.15514	0.0485484	0.691595
Dcaf10	0.146923	-2.99856	-0.702315	0.191858	-0.24436	0.407456	-0.944891	-1.21755	1.40922	2.13464	0.048561	0.691595
Osgin1	-2.35886	-3.03277	-0.327334	-1.4033	0.0945716	-1.29625	-2.42358	-4.4573	0.692994	2.15458	0.0486052	0.691595
Eaf2	-1.46246	0.231627	0.97023	-0.0052644	0.67995	0.436865	0.608707	0.341704	2.8634	2.13409	0.0486176	0.691595
Itgb3	1.30707	2.59739	0	0	0	0	0	0	0.0835835	2.5524	0.0486526	0.691682
Dpysl5	2.43471	2.48969	2.18858	0.941282	1.37242	2.10751	2.04481	2.96891	1.41814	2.13341	0.0486884	0.69178
Gm34701	1.37131	1.26149	0	2.50735	1.68586	0	0	0	0.117109	2.7918	0.0487341	0.692018
Gm51540	0.282952	0.946084	-0.388452	-0.195937	-0.592585	-0.0153521	-1.76534	-0.597168	1.086	2.13212	0.0488219	0.692854
Pcnx2	-2.00857	0.247146	-0.977578	-2.41455	-2.78871	-1.21448	-2.88458	-2.22141	1.15632	2.13169	0.0488667	0.693079
Cyp2j8	0	1.26089	0	0	1.44503	0	1.94821	0	0.0759619	2.57152	0.0490266	0.694902
Cdkn3	0.496631	-4.30322	-0.765394	-4.30322	-0.88151	-0.0059519	-0.268154	-2.87925	0.810887	2.17515	0.0490814	0.694902
LOC118567365	0	2.50876	1.15577	0	1.31873	2.37114	1.36217	0	0.14482	2.31877	0.0490823	0.694902
Rab11fip1	0	0	1.05344	0	0.944389	1.09488	2.35893	0	0.0896263	3.18663	0.0491388	0.69529
Vmn2r47	-1.65603	-1.65603	-1.65603	-0.45466	0.391816	-1.65603	-1.65603	0.388846	0.110601	2.30809	0.0492824	0.696911
1700016C15Rik	0.63349	-0.199868	-3.15599	0.111585	-3.15599	0.752832	1.1663	-0.333884	0.633768	2.17107	0.0494864	0.699063
Serhl	-1.57363	-1.74438	-1.46458	-2.51365	-3.71285	-2.00599	-0.464694	-0.95216	0.374044	2.14586	0.049493	0.699063
Rpl13-ps3	-0.166904	-0.104737	-0.114059	-0.378559	-0.464397	-0.426155	-0.554495	-0.583746	6.68664	2.12522	0.0495425	0.699157
Stk10	-1.89664	0.508971	-2.44829	0.492542	-2.56659	-2.74149	-0.206188	-0.434149	0.645941	2.12507	0.0495581	0.699157
Serpinf1	-1.96685	0.447875	-0.67174	-2.15479	-0.840116	-1.655	-0.99046	0.277705	0.462654	2.12445	0.0496243	0.699679
Chst8	-0.0466126	0.00758017	-0.538327	1.27102	1.25069	1.24397	1.27799	-4.29717	1.50168	2.14404	0.0496801	0.69969
Gm51950	-2.17164	-2.17164	-2.17164	-0.339869	-0.416404	0.299223	0.664522	-2.17164	0.207063	2.5441	0.0496835	0.69969
Neat1	-1.57787	-4.0109	-1.95302	-2.16886	-1.26815	-1.15672	0.0435159	-2.67168	0.481435	2.14358	0.0497282	0.699908
E330021D16Rik	-3.99433	-2.72327	-1.28635	-3.99433	-0.476826	-0.83631	-0.880213	-2.5669	0.449045	2.16812	0.0497824	0.70001
Cfap300	-0.228175	-0.804028	0.299116	-0.725874	0.532048	-0.529675	0.29933	-0.0335176	4.0501	2.12264	0.0498144	0.70001
1700021F07Rik	0.201928	-1.751	-1.751	1.62997	0.0017061	-0.636448	0.195935	0.34622	0.246147	2.48491	0.0498622	0.70001
Rictor	-0.348988	0.475281	-0.172704	0.115322	-0.936784	-1.76217	-0.773432	-0.506239	2.95297	2.12208	0.049874	0.70001
Atxn7l2	-4.53436	0.998777	0.611092	-0.126664	-0.947859	-0.923272	-0.341382	-0.215471	1.17363	2.14209	0.0498817	0.70001
Prkcg	-0.703685	-2.16595	-0.542111	-1.16117	-2.47372	-1.4858	-5.10726	-1.43371	1.59908	2.1217	0.0499141	0.700055
Clec4b1	2.11211	0	1.83282	1.27029	0	1.09645	2.9958	3.05399	0.224966	2.21179	0.0499975	0.700466
Pilrb1	-2.53517	-1.53097	-0.872961	-2.00317	0.098097	0.0289623	-0.669171	-3.28116	1.31468	2.12075	0.0500156	0.700466
Mrap	-3.27774	-1.91305	-1.65784	-0.612362	-1.06369	-0.865572	-0.676866	-0.519647	0.762988	2.1206	0.0500312	0.700466
LOC118567464	-2.24275	0.222777	-0.34428	-0.972273	-2.24275	-0.885712	0.351459	-2.24275	0.201608	2.4264	0.0500762	0.700687
Myt1	-0.377884	-5.23222	1.20172	0.181956	-0.698303	1.06337	-0.677059	-0.0522161	2.8849	2.11969	0.050128	0.701001
Tafa4	-0.48408	-3.25798	0.992172	0.153494	1.6491	-1.20129	-0.233283	-0.254349	1.42287	2.1193	0.0501697	0.701175
Jsrp1	-2.10119	-2.10119	0.875116	0.839356	1.21293	-0.986229	-0.104602	-0.729719	0.300006	2.16327	0.0502713	0.701917
Foxf2	0	1.2614	0	0	0	2.17516	2.3546	0	0.110984	2.98817	0.0502814	0.701917
Kifc5b	0	0	2.23192	0	0	1.09468	1.13379	0	0.0750349	2.58269	0.0503434	0.702372
Siglece	2.5248	0	0	0	0	1.11294	0	0	0.0798332	2.52745	0.0503911	0.702575
Ecm2	-0.165094	-1.15834	0.221656	-0.609164	0.606113	-2.13352	-0.275918	0.409018	1.39328	2.1169	0.0504256	0.702575
Serpinb8	0.00501428	-2.79339	0.0447738	1.51992	0.586491	0.624449	0.0535703	0.154517	0.5794	2.13667	0.050446	0.702575
Serinc3	-0.201597	-0.298464	-0.306922	0.365853	-0.114542	-0.150184	-0.356571	-0.130137	6.25306	2.11475	0.0506562	0.704862
Nlrc5	-2.74377	-2.74377	-2.74377	-2.74377	-2.74377	-2.74377	-2.74377	-2.74377	0.0799917	2.80383	0.050669	0.704862
1700030J22Rik	-1.75319	-1.75529	0.981947	-1.9055	-0.153109	0.590264	-1.37406	-1.52367	0.435874	2.11397	0.0507406	0.705447
Catsper2	0.474951	-2.81526	-0.914501	1.02199	0.576266	0.905243	1.60797	-2.05017	1.36535	2.11355	0.0507857	0.705498
Gm32632	-2.3213	-2.3213	-1.26762	-0.48966	-1.37665	-2.3213	-2.3213	-2.3213	0.100477	2.86758	0.0508624	0.705498
Zwilch	0.219508	0.988311	1.57021	1.47439	2.70882	2.78939	1.01863	-1.87096	0.722046	2.13252	0.0508823	0.705498
Gm16184	-1.23272	0.0428897	0.00134956	-0.6896	0.143116	0.870665	-0.173496	-2.42504	0.785705	2.11263	0.0508847	0.705498
Snord3a	-0.963902	-2.17082	-2.17082	-0.900592	0.150304	0.55968	0.664375	-2.17082	0.234104	2.3712	0.0508915	0.705498
Zbtb24	-2.76635	0.444366	-0.868005	-2.76635	0.436011	-0.402444	-1.19745	-2.76635	0.307437	2.1862	0.0511633	0.707942
Nat8f4	1.83389	-2.6627	1.79342	1.64802	1.25273	0.906916	1.40136	0.916423	0.880413	2.12981	0.051169	0.707942
Edn2	0	0	0	1.30421	1.24063	2.49158	2.53373	0	0.14573	2.57292	0.0511834	0.707942
Wdr86	-0.557448	-2.56319	-2.56319	-1.44964	-0.0870279	-2.56319	-1.68333	-0.3925	0.189226	2.42959	0.0511896	0.707942
Nr1i3	0.862685	-1.13993	1.77707	-2.56535	0.777366	0.313939	1.6432	1.20464	0.658739	2.12913	0.0512406	0.707942
Aldh3b2	1.30707	0	0	0	0	1.7868	0	2.53939	0.103271	2.79086	0.0512679	0.707942
Ncf2	-2.16566	-0.800655	-1.10971	-0.320914	0.711215	-0.887121	-2.16566	0.321088	0.216147	2.15347	0.0512749	0.707942
Ct55	-2.15091	-0.216796	-0.492585	-0.918817	-3.53705	-0.091593	-0.0467875	-2.11021	0.496203	2.12806	0.0513546	0.708223
Tspan18	-4.49188	-3.77334	-0.903203	-1.67854	-2.54095	-1.63442	-2.36525	-2.49566	0.97133	2.10811	0.0513752	0.708223
Ovol1	0	0	1.67672	2.88258	2.26241	0	3.41048	0	0.227185	2.28424	0.0513839	0.708223
Mapk3	0.363778	0.890526	0.420626	0.398348	0.833966	0.848848	0.343387	0.269104	3.64996	2.1071	0.0514853	0.709211
Zfp965	0	3.62413	0	0	0	0	0	0	0.125616	2.78911	0.051517	0.70924
Gm24949	-0.798369	-2.61331	-2.61331	-1.34343	-0.858103	0.565278	0.355192	-1.24189	0.281557	2.28639	0.0515885	0.709547
Rgr	-0.35828	-0.50324	-3.49029	0.022196	0.504119	0.326379	-0.821875	-2.14897	0.607786	2.12539	0.0516396	0.709547
Esyt3	-1.6436	-1.52934	-2.91332	-1.64263	-1.16061	-2.91332	-1.20905	-2.91332	0.176214	2.18139	0.0516446	0.709547
Tmem184a	-1.43559	-1.43559	-0.380782	0.123728	-1.43559	1.68879	-1.43559	-1.43559	0.154344	2.2812	0.0516578	0.709547
Nat8f6	-0.831854	-0.157257	-2.0389	-2.0389	0.691826	-0.350757	1.17122	-0.705696	0.247191	2.14746	0.0519003	0.712468
LOC118567381	1.79387	1.03325	-1.09604	0.765078	1.94695	-1.09604	0.945149	0.274601	0.257655	2.15935	0.0519567	0.712474
Myo1b	0.0474611	-0.321048	1.8534	0.938461	1.02322	0.430659	0.0657957	-3.6251	1.91514	2.10277	0.0519602	0.712474
Arhgap25	2.11362	0	1.89857	0	0.94534	0	0	2.6301	0.130049	2.56932	0.0521338	0.714445
Fcgr3	-1.92451	-2.84752	-1.77013	-2.17536	0.599957	-0.518836	-1.23514	-1.51926	2.14082	2.10092	0.0521644	0.714456
Mnd1	-0.559187	0.617659	-1.30653	-3.21211	-3.21211	-1.87011	-0.615122	0.406727	0.432408	2.14441	0.05222	0.71457
Arl9	0.999362	2.97426	1.60723	0.0154723	1.81972	0.996071	1.88062	0.233409	0.417378	2.10031	0.0522325	0.71457
Scml1	1.26938	1.43735	1.90755	0	2.04755	0	0	0	0.104099	2.43269	0.0523171	0.71532
Gm5389	2.01072	-1.75852	0.949692	0.8586	1.43283	0.803867	0.194498	0.338959	0.412084	2.14696	0.0525547	0.717915
Mir135a-2	-1.87034	-1.87034	-0.816301	-0.757572	-1.87034	0.721122	-1.87034	-1.87034	0.116696	3.35006	0.052567	0.717915
Gm30788	1.37054	0	2.22916	2.30398	0	2.62565	1.95306	1.37044	0.196141	2.2461	0.0526963	0.719233
Fibcd1	3.4009	2.69634	2.68056	4.16291	2.47826	3.30618	3.255	1.34025	0.533441	2.11537	0.0527235	0.719233
Upb1	0.604045	0.511971	0.607788	-1.74977	-0.803793	-1.74977	-1.74977	-1.74977	0.159153	2.47137	0.0528856	0.721034
Nlrp5	3.15301	-1.12052	2.75249	2.91068	3.86733	2.30972	2.29219	2.91176	0.877343	2.11356	0.052922	0.721119
Gm13818	-0.244448	0.768584	0.985657	-0.758511	-2.16992	-0.281907	-0.387889	-3.13504	0.516304	2.11279	0.0530059	0.721851
Sema3a	0.715022	1.53784	0.604934	-0.0024561	1.61152	2.14812	-0.436099	3.69229	1.75634	2.09293	0.053056	0.722027
Gm8531	-1.43606	1.20707	-1.43606	-0.237189	0.874915	-1.43606	-1.43606	-1.43606	0.139695	2.43194	0.0530792	0.722027
Cfap69	0.0514144	-3.42994	-3.42994	-2.13575	-1.128	-0.0939529	-0.852146	-0.0368687	0.448504	2.13595	0.0531183	0.72215
Gm35280	-1.28365	-2.5907	-2.5907	-2.5907	-0.83799	-2.5907	-0.505729	-2.5907	0.141634	2.26428	0.0532125	0.723019
Thbs1	-2.32513	-2.32513	-0.974607	-2.32513	-2.32513	1.02048	-0.942107	0.508842	0.226698	2.2052	0.0534019	0.725182
Eml5	-1.93314	-1.83447	-1.58173	-1.64716	-1.2416	-1.90122	0.422056	-3.44994	4.02963	2.08935	0.0534593	0.72555
Gm11620	-1.28572	-1.29067	-1.07919	-2.67466	-2.67466	-0.573785	-1.1072	-2.67466	0.171156	2.16267	0.0535611	0.726519
Ddhd2	-1.04936	0.621752	-0.523828	0.0602497	-0.148021	-0.0840014	-0.0988786	-0.353213	5.43086	2.08794	0.05362	0.726906
Fam50b	0	0	1.05265	0	0	0	1.9473	0	0.056654	2.72598	0.0537572	0.727943
Gm12538	0	0	1.43902	0	0	0	2.46425	0	0.083471	2.955	0.0537573	0.727943
Krt84	-2.57019	-2.57019	-2.57019	-0.871637	-0.78082	-2.57019	-0.524036	-2.57019	0.142654	2.25761	0.0538386	0.728315
Gm46796	2.11388	0	0	1.84027	0	2.18738	0	0	0.115531	2.34109	0.0539177	0.728315
Wnt3	0.258761	0.331533	0.94623	-2.27026	-0.966372	0.273591	-2.27026	-2.27026	0.272503	2.15914	0.0539306	0.728315
Gal3st2c	2.68823	2.84202	2.23301	2.90428	3.60163	0	3.19816	1.33669	0.399158	2.1283	0.0539437	0.728315
Xkr7	0.935746	-0.86517	2.70097	0.144877	0.791542	1.26802	2.41533	0.617314	0.696553	2.08437	0.054027	0.728315
Zfp865	-0.185638	-2.42918	-1.38279	-3.25192	-1.02742	0.508181	0.00753723	-0.12359	1.00339	2.08434	0.0540308	0.728315
Csf2rb	0	0	2.23108	0	0	0	0	0	0.0519485	2.74631	0.0540751	0.728315
LOC118567766	0	0	2.23108	0	0	0	0	0	0.0519485	2.74631	0.0540751	0.728315
Piwil1	0	0	2.23108	0	0	0	0	0	0.0519485	2.74631	0.0540751	0.728315
Map3k8	-0.373376	1.55624	0.312489	1.19745	-2.8064	-2.8064	-1.1181	-0.35429	0.482592	2.12676	0.0541116	0.728315
Nr1h3	-1.86599	0.103926	0.325983	1.56634	1.8898	1.09204	1.40852	1.16195	2.28899	2.08355	0.054121	0.728315
LOC118567667	-0.664174	-0.478943	0.773098	-1.87036	-1.87036	0.193849	-1.87036	-0.357289	0.166292	2.15667	0.0541901	0.728315
Nusap1	2.35443	3.05429	1.83285	0	2.05273	0	2.11609	1.51208	0.230104	2.15649	0.0542097	0.728315
Cyp2e1	-2.41812	0.145471	0.22897	-0.557041	0.491108	-0.139681	-2.41812	-2.41812	0.273085	2.15648	0.0542106	0.728315
Vstm5	0.17327	-1.09705	0.3366	2.10922	2.60022	1.55306	0.129044	0.413566	0.341955	2.10062	0.0543601	0.729913
Itpripl1	-1.93962	1.46577	1.51341	-1.93962	0.10265	1.23383	1.44171	1.51998	0.471907	2.12386	0.0544282	0.730418
Crhr2	-1.34992	-1.34992	0.00141732	-0.148531	-1.34992	0.451719	-1.34992	1.48145	0.142713	2.24729	0.0544622	0.730464
Epha3	-1.16695	-3.14846	-3.14846	-3.14846	0.179321	-1.47457	-2.0154	-1.13362	0.258515	2.15349	0.0545267	0.730525
Ttc22	1.12679	0.0159794	0.887673	1.36275	-1.34902	-1.34902	0.604284	-1.34902	0.203022	2.1534	0.0545367	0.730525
Gm26908	0.443374	-3.32916	-1.98856	-1.15759	0.315912	-0.924908	0.803959	-1.33385	0.553116	2.09886	0.0545582	0.730525
Gm16551	0	2.62483	0	2.27477	0.945334	0	1.2889	0	0.129788	2.9527	0.0546192	0.730932
Serpina1c	-0.14444	-3.22121	-0.391064	-0.422576	-0.917978	-1.00284	1.0102	-0.718657	0.506894	2.09771	0.0546885	0.731451
Gxylt2	-1.43722	-1.44394	-1.35725	-0.772907	-2.70733	0.897944	-2.70733	-0.251235	0.278744	2.12082	0.0547632	0.732042
Gm4052	-1.80663	0.686052	-0.211186	0.306521	-1.80663	0.357086	-1.80663	-1.80663	0.170211	2.189	0.055037	0.735291
Prkd2	0.867431	0.353399	1.50028	-1.1988	-1.87615	-0.887485	-0.370518	-2.20673	0.790559	2.07489	0.055123	0.736029
Naip1	2.78196	0	0	0	1.44569	0	0	0	0.0940971	2.46304	0.0551958	0.73659
Kcnmb1	0.205116	2.50998	2.09582	2.28012	0.947396	1.30945	0.827188	-1.10176	0.388717	2.09236	0.0552975	0.737389
Gm41025	-1.20969	-1.20969	0.383949	-1.20969	-1.20969	-1.20969	1.59283	-1.20969	0.10868	2.3248	0.0553525	0.737389
Fitm2	1.85036	2.79166	1.91117	1.16435	2.59957	2.52329	3.28147	1.95958	0.729784	2.07273	0.0553757	0.737389
Il21r	2.68226	0	1.05387	1.30476	0	1.11327	0	0	0.109058	2.42481	0.0554	0.737389
Gm32886	-0.679561	-0.303968	0.0630546	0.446793	0.346246	-0.2214	-2.54021	-1.6411	0.697459	2.07244	0.0554097	0.737389
Ifit1	0	2.26269	1.42785	2.21888	0	0	1.69528	0	0.127795	2.27511	0.0554902	0.73805
Nrl	0	1.38407	3.14673	0	0	1.23351	1.56695	0	0.131095	2.48638	0.055646	0.738513
Memo1	0.634038	-0.166813	-0.554622	-0.167241	0.835341	0.550072	0.934381	-0.507426	3.08271	2.07033	0.0556575	0.738513
B3galnt2	1.16171	1.0367	0.748638	1.98905	0.269592	1.60658	-0.191657	2.94463	1.41157	2.07028	0.0556636	0.738513
Procr	0.108583	2.61828	0.999931	1.80399	0.959182	0.0148416	2.71441	1.96357	0.442183	2.07008	0.0556867	0.738513
Car5a	-1.2099	-1.2099	0.385214	0.723367	-1.2099	-0.0961268	1.52428	0.160398	0.158311	2.52836	0.0557069	0.738513
Maml3	1.53281	0.200021	-0.235482	-1.32179	1.47297	-0.19436	-0.133465	-0.379296	0.775828	2.06988	0.0557101	0.738513
9930012K11Rik	0.144333	-3.02838	-1.60433	-0.17351	-2.07932	-3.02838	-0.197858	-0.656388	0.332649	2.11192	0.0557536	0.738682
Fhad1	-0.271829	1.04625	-4.82614	1.12592	0.815013	-1.68783	0.284734	-3.44657	1.53757	2.08744	0.0558633	0.739725
Gm16478	2.43124	0	0	1.76944	1.30583	1.27919	0	2.44141	0.15672	2.53377	0.0559706	0.740016
Snai1	2.51408	0	2.42616	1.20138	0	0	1.13355	0	0.128349	2.82098	0.0559759	0.740016
Gm8856	1.20568	1.36495	0	0	2.73319	1.68622	0	0	0.12443	2.99647	0.055978	0.740016
LOC115487748	0	0	0	2.50474	1.24079	1.91523	1.56692	0	0.129066	2.50869	0.0560686	0.740655
Lrriq3	-1.89117	-4.36179	-0.227519	-0.975853	-1.88255	-0.47609	-3.10957	-0.183714	0.695663	2.0853	0.0561111	0.740655
LOC105242404	-1.75122	1.1027	0.449206	-1.75122	0.699303	1.24705	0.204081	-1.75122	0.263642	2.13835	0.0561576	0.740655
Crygs	0	0	0	1.19879	2.04567	0	0	0	0.064022	2.45077	0.0561658	0.740655
Mau2	-0.179458	0.00653144	-1.71466	-1.91358	-4.7917	-0.787019	0.330773	-2.08418	1.67252	2.06591	0.056181	0.740655
Gm14685	-1.55222	-0.50071	-1.25146	0.0951699	-4.60231	-2.0889	-0.714809	-4.44006	1.49981	2.06509	0.0562782	0.741042
Cip2a	-0.988522	-0.00157723	0.660968	-1.09652	-2.29552	1.30412	-0.929116	-0.961916	0.309448	2.08353	0.0563173	0.741042
Rtkn2	0	0	0	0	0	0	1.9476	1.36989	0.0627886	2.44866	0.0563341	0.741042
Kirrel2	1.84222	0.218671	0.219292	2.05059	-0.380282	1.98344	1.85865	-0.304371	0.502691	2.06402	0.0564054	0.741042
Fancl	1.69894	-0.962026	2.37273	0.129809	-0.866401	1.39905	0.500181	0.93261	0.641997	2.06392	0.0564177	0.741042
Xndc1	0.00165953	2.56929	1.72845	0.800992	1.57587	1.2053	2.65138	-1.21261	0.445445	2.08249	0.0564384	0.741042
Casp8	0.0969485	-1.21008	-1.21008	0.621688	1.80704	1.4376	-1.21008	0.122822	0.205894	2.13557	0.0564619	0.741042
Hecw1	-3.21119	0.945968	1.20826	0.0775269	-0.471059	0.352182	1.19037	-0.143371	3.1847	2.06333	0.0564884	0.741042
Tnni1	-0.129753	-1.43681	-1.43681	0.394848	0.821056	-1.43681	-1.43681	-1.43681	0.116615	2.22974	0.0565354	0.741042
Ttc23l	2.97752	0	0	0	0	0	0	0	0.0924	2.70706	0.0565468	0.741042
Col11a1	-1.39835	2.58716	0.00249237	3.42372	1.8559	2.74926	1.8284	0.760998	0.664117	2.08153	0.0565508	0.741042
Gm43380	2.03779	1.26302	2.95691	2.89002	2.63267	1.09663	0.880807	0	0.242945	2.23109	0.0565946	0.741075
Pign	-0.350404	1.37421	1.24403	1.54235	-0.191601	-0.626801	2.43403	2.59479	1.22874	2.06191	0.0566584	0.741075
1700024G13Rik	-1.20975	-1.20975	-1.20975	1.52819	0.0310798	0.476464	-1.20975	-1.20975	0.124087	2.93558	0.0567114	0.741075
Acer3	-1.94106	-0.884011	-0.475441	0.00154873	0.263077	-0.767404	-0.262678	0.500946	3.31782	2.06125	0.0567367	0.741075
Gm16102	2.43127	1.38413	1.89861	0	0	0	0	0	0.102276	3.14669	0.0567693	0.741075
Nt5e	-1.27903	-1.9924	-0.82965	-0.80362	-0.177165	-0.366532	-1.58734	-2.3842	1.01554	2.06095	0.056773	0.741075
Gm49428	-2.35102	-0.986052	-2.35102	0.438471	-1.40509	-1.2553	-1.47178	-2.35102	0.157461	3.24393	0.0568194	0.741075
LOC108167594	-0.723161	0.716196	-2.69226	-0.860402	-0.939553	-2.69226	-0.584602	-0.544426	0.288432	2.10234	0.0568396	0.741075
Mastl	-0.535015	-0.450613	-1.84206	-0.537981	-1.84206	-1.84206	1.04917	-1.84206	0.155052	2.18913	0.0568548	0.741075
Gm33937	1.5316	1.88651	2.104	1.32064	2.20799	1.54821	3.11842	2.32275	15.8918	2.0602	0.0568629	0.741075
Fchsd2	-0.271662	-0.41796	-0.911767	-0.808286	0.262151	-0.801936	-1.56202	-2.33459	3.01987	2.05947	0.0569506	0.741815
Zbtb11os1	-0.505848	-2.62733	-1.57248	-0.855765	-2.62733	-0.926051	-2.62733	-2.62733	0.156254	2.65876	0.0570553	0.742773
Unc45a	0.959772	0.556274	0.967821	0.380872	0.614394	0.47529	0.104158	-2.40378	2.52946	2.05747	0.0571929	0.743741
Slfn2	0.764457	-2.60551	-0.629399	-0.745571	0.538417	0.937217	-0.634533	-1.26888	0.397878	2.12349	0.0572008	0.743741
Gjc2	-1.20995	0.903258	-0.15482	-1.20995	1.93363	-1.20995	-1.20995	0.887226	0.170619	2.56007	0.0572347	0.743741
Ppp1r3b	-1.85136	0.175162	0.763802	-0.648093	0.836034	-0.217877	0.728746	2.35449	1.23917	2.05651	0.0573088	0.743741
Tifab	2.35462	2.66503	3.07381	1.27007	2.43972	1.27817	0	1.33325	0.25425	2.09803	0.0573343	0.743741
Igsf9	-3.83915	-1.08112	-0.1991	-5.18629	0.799702	-0.53253	0.15229	0.862764	1.58575	2.07465	0.0573618	0.743741
Uncx	1.39727	0	1.43618	1.8426	1.24014	0	3.59207	1.37046	0.203625	2.1611	0.0574022	0.743741
Chtf18	-0.892097	-2.84493	-1.40827	-2.84493	-2.84493	-2.84493	-1.96524	-0.0113687	0.180698	2.16635	0.0574076	0.743741
Gm5493	0	0	0	0	2.41666	1.11265	0	0	0.0759944	3.14726	0.057428	0.743741
Gm6072	-0.249043	-1.74355	-0.905298	-3.13477	-1.44779	-2.03818	-2.00164	-3.13477	0.239013	2.85457	0.0574721	0.743741
St3gal3	1.41624	1.28401	0.478801	-1.46506	-1.54459	-0.0504741	0.0434921	-0.259322	3.52344	2.05464	0.057536	0.743741
Gm34369	0	1.38411	0	0	2.19399	0	2.28684	0	0.111802	2.69891	0.0575718	0.743741
Mtnr1a	-0.978893	-2.36849	-2.36849	-2.36849	-1.12762	-2.36849	-0.418356	-2.36849	0.119964	2.21923	0.0575881	0.743741
Gpat2	1.96317	2.22422	3.54022	-1.40209	1.23566	2.60199	1.47559	-1.40209	0.609124	2.0958	0.057592	0.743741
Dcbld1	-0.981247	2.45577	1.93556	-1.06794	0.787364	0.0299248	0.0230243	0.755655	0.613713	2.05392	0.0576236	0.743741
Nkx6-2	-0.0395679	0.902431	0.566963	0.0371317	1.02956	1.52248	0.28884	-0.729911	3.48363	2.0539	0.0576267	0.743741
Ctu2	-0.929036	-1.32831	-0.270351	0.349302	0.409261	-0.012433	0.501553	-1.81868	2.07782	2.05331	0.0576979	0.743872
5033404E19Rik	2.35802	0	0	1.69879	1.75271	0	0.879257	2.65355	0.158155	2.74215	0.0577262	0.743872
Lypd2	0	0	0	2.85006	0	0	0	0	0.0849152	2.68895	0.05773	0.743872
Gm12734	-0.402464	-0.143759	-0.17679	-0.395823	-2.6325	-1.0353	-0.478003	-0.602397	1.22041	2.05233	0.057818	0.744229
Gm11655	0	0	1.42845	0	2.04745	1.68581	0	1.37079	0.101786	2.42485	0.0578198	0.744229
Gpr3	-1.74926	-1.74926	-1.74926	0.154112	-0.302421	-1.74926	0.621039	-1.74926	0.127597	3.04829	0.0579109	0.744999
Prrg1	-6.10955	-1.80751	-1.04305	0.913159	-2.32912	-0.615267	-0.728793	-1.69667	1.82531	2.06961	0.0579624	0.745262
Gm32749	-1.43707	-1.43707	-0.383192	-1.43707	0.820459	-0.34193	-1.43707	-0.0669685	0.109198	2.16022	0.0580658	0.74619
Cldn2	0	0	0	0	0.944166	0	2.60377	0	0.080681	2.68024	0.0581595	0.746846
Jmjd4	3.45095	4.02733	3.3249	4.10734	3.66287	1.3289	3.19072	3.14494	0.661105	2.06771	0.0581904	0.746846
Smim5	0.873736	-1.25666	-2.62179	-0.690964	-2.62179	-0.344014	-0.0636982	0.708512	0.358386	2.0905	0.0582104	0.746846
Hmmr	1.30704	0	1.83253	1.19891	1.6865	0	3.1979	1.3711	0.182896	2.52485	0.0582627	0.747075
Ccdc14	0	0	2.46623	2.26871	0	0	0.878423	1.37086	0.118115	2.21232	0.0582906	0.747075
Gm20336	2.44424	1.13436	-0.346532	1.5804	-0.112228	0.376643	0.614004	2.24164	0.433884	2.04753	0.0584075	0.748173
Adamts15	3.05344	1.36506	3.80165	2.33675	0	2.60348	1.70343	1.37083	0.321277	2.08735	0.0585808	0.749991
Gm15283	0	0	0	0	0.944645	1.90069	0	2.54042	0.100158	2.84922	0.0586834	0.750903
Eva1c	-1.94868	0.340671	-0.793322	1.60816	0.568605	1.92097	-0.574545	-0.367754	0.920228	2.0444	0.0587948	0.751704
Kcnn1	-1.87156	0.590997	-2.06717	1.24182	1.12847	0.443434	-0.321357	-3.14657	0.678765	2.0626	0.0588088	0.751704
Dthd1	-1.14028	-0.405228	-2.95455	-0.393264	-1.71465	-2.95455	-1.8214	-1.62144	0.234859	2.08475	0.0588872	0.751826
Lrrc17	1.40087	1.85722	2.09441	1.20171	2.14243	1.42598	3.03955	2.21939	14.5427	2.04365	0.0588885	0.751826
Chrna5	-1.64194	1.13963	-3.00262	0.206917	1.51232	-3.00262	0.667177	-0.224322	0.610062	2.08454	0.0589125	0.751826
Gm32139	1.813	0	2.45703	0	1.75526	1.2792	0.879217	2.09717	0.156109	2.11287	0.0590113	0.752685
Gm33651	0	2.09607	0	0	0	0	2.4354	2.13925	0.126588	2.28466	0.0590586	0.752887
Olfr92	0.775526	0	1.89859	0	0.771502	2.06313	1.95004	0	0.117704	2.39087	0.059198	0.754237
Apaf1	0.766988	1.48223	3.10979	2.35103	2.24198	0.0126021	2.38254	2.65721	0.586161	2.04093	0.0592275	0.754237
Csrp2	0.778694	0.515044	-0.0626738	-0.425963	-0.201715	-0.337183	0.395063	0.487416	2.9824	2.04018	0.0593217	0.755035
Bcl2l11	3.08186	4.11809	3.27596	2.93387	3.31412	2.78284	0.529853	3.76796	1.57309	2.03957	0.0593979	0.755603
Gm8870	1.77022	0.830519	1.87736	0.591414	0.962644	1.286	2.37574	1.80613	0.80387	2.03852	0.0595299	0.756692
Serinc2	4.47477	5.08243	4.03765	5.14246	4.5605	3.49174	0	2.57578	1.0336	2.07904	0.0595679	0.756692
Gm16794	-3.64975	-3.64975	-3.64975	-3.64975	-2.70522	-3.64975	-3.64975	-3.64975	0.122412	2.40933	0.0595783	0.756692
Reck	3.30048	1.98218	2.98537	2.22396	1.3775	0	2.02241	3.05642	0.327158	2.0785	0.0596331	0.756987
LOC118567760	0.119564	2.08352	0.687396	-1.27649	1.47512	1.86556	0.680198	-1.27649	0.310353	2.07761	0.0597391	0.75773
Pbdc1	0.190119	-0.623461	-0.0224891	-0.74046	-0.191952	-0.151201	-0.62792	-0.153712	4.39339	2.03673	0.059755	0.75773
Dmrta1	-2.55921	-2.55921	-1.2075	-2.55921	-2.55921	-1.44594	-2.55921	-1.1286	0.108926	2.52522	0.0598464	0.758153
Gramd2	-0.548136	2.3999	0.737774	-0.904868	-1.51813	1.10663	1.91549	0.182927	0.826193	2.03579	0.0598736	0.758153
Cdc25b	-0.163106	-2.16864	-0.74341	-2.16864	0.701007	-1.07185	0.973073	-0.797287	0.259393	2.07641	0.0598833	0.758153
Arhgap17	0.744833	0.785612	-2.76315	-0.456308	0.113174	-0.326059	-0.120998	-3.26217	1.79821	2.03414	0.0600835	0.759822
Mmachc	0.511666	0.716347	0.194089	0.170352	-0.358366	0.150886	-0.607573	0.394265	2.17785	2.03413	0.0600839	0.759822
Krt13	-2.98272	-2.98272	-1.55458	-2.98272	-2.98272	-2.98272	-2.98272	-1.61188	0.115018	2.27326	0.0601574	0.759822
LOC118567650	1.39761	2.05001	1.59565	0	2.72271	2.03073	0.879638	0	0.177638	2.10297	0.0601586	0.759822
Abca14	0	1.39149	1.35134	0	1.30611	2.81902	1.22908	0	0.142137	2.14107	0.0601739	0.759822
Polr3k	0.219624	0.357868	0.482805	-0.559909	-1.16311	0.693462	0.0591228	-3.1976	0.59793	2.05066	0.060278	0.760736
Tmem35a	-0.643816	-0.676433	-0.247775	-0.182865	0.135054	-0.278247	-0.618575	-0.841986	3.22397	2.03212	0.0603406	0.761125
Gm8245	-2.10414	0.0257768	-1.04906	-2.10414	-2.10414	-2.10414	0.0511327	0.390625	0.1678	2.42172	0.0603998	0.761471
Tbr1	-0.79727	-1.20417	0.376426	-2.76634	-2.76634	-1.65117	1.25166	-1.39479	0.3297	2.07085	0.0605573	0.762872
Igdcc3	-2.24544	0.681959	1.02128	-2.40575	-1.77304	-0.93398	0.445637	-1.5084	0.642574	2.03017	0.0605893	0.762872
Dock6	4.07014	-1.36318	3.03734	4.12139	2.60591	4.45376	3.92277	4.11999	1.53984	2.04803	0.0606066	0.762872
Gk	0.390816	1.04649	-1.31878	1.01982	-0.0381356	1.56601	0.0158707	2.30245	1.53495	2.02875	0.0607706	0.764535
Gbp9	-3.28889	-3.28889	-3.28889	0.195311	-3.28889	-3.28889	-3.28889	-3.28889	0.192117	2.39466	0.0608386	0.764988
Slc22a21	0.860201	-3.71115	-0.244614	1.1247	-1.18146	0.218415	0.164751	-3.71115	0.835965	2.06807	0.0608971	0.765322
Vav2	1.23527	1.51404	-2.58699	1.20259	-0.61418	1.03797	-0.934822	-2.58699	0.566063	2.0673	0.060991	0.766099
St8sia1	-0.964361	-1.56434	0.968897	1.91481	-1.5943	0.60868	-0.342181	0.103173	1.56246	2.02664	0.0610419	0.766337
Lzts2	0.757719	-0.247583	0.0433139	-2.14726	-2.39704	-0.531206	-0.965809	-1.18672	2.55566	2.02592	0.0611356	0.76711
Dennd3	1.95259	1.42878	2.67622	4.35166	2.79281	2.71338	3.10863	3.12387	0.489105	2.04308	0.0612293	0.767884
Cnih4	-0.995791	-0.740532	-0.585158	-0.185132	-0.0187897	-0.629039	-0.494307	-0.129695	3.15746	2.02469	0.0612937	0.768087
Sh3bgr	0.71356	1.68574	0.61788	0.388034	0.804148	0.835832	0.895887	1.22728	2.84239	2.02457	0.0613096	0.768087
Gm24105	-1.20986	-1.20986	0.141411	-1.20986	-1.20986	0.462266	1.78052	0.122589	0.148901	2.35719	0.0613994	0.768156
Gm35619	-1.20348	-2.41016	-2.41016	-1.21123	0.146684	-2.41016	0.210816	-0.363437	0.211247	2.13963	0.0614066	0.768156
Tert	1.97649	2.89257	3.30131	1.86043	2.00034	1.69221	3.53277	2.04791	0.368318	2.04152	0.0614267	0.768156
Gm4956	-3.28976	-3.28976	-3.28976	-2.09088	-1.97391	-3.28976	-2.00136	-3.28976	0.147003	2.18212	0.0614657	0.768156
Prss22	-1.34786	-0.0843139	1.1137	-1.34786	0.703556	1.96667	1.37921	0.936589	0.294224	2.06313	0.061504	0.768156
Ppl	1.20562	0	0	2.69046	0	1.37128	0	1.43056	0.119897	2.61048	0.0615077	0.768156
Fam222a	0.708946	1.66545	1.02857	2.36295	1.60271	1.82694	0.438896	-1.67873	0.517008	2.03821	0.0618481	0.771575
Gm6341	-0.372326	0.701764	-0.0352229	-0.0562336	0.147978	0.00305863	0.4105	-0.485609	6.3453	2.01971	0.0619416	0.771575
Kcnc2	-1.1032	-4.25683	0.957834	0.691268	-1.43602	0.275653	0.851518	0.523421	3.11444	2.01968	0.0619455	0.771575
Gm34783	-3.19975	-0.779099	-3.19975	-0.754494	-2.25133	-0.408697	-0.769589	-1.82901	0.292069	2.40772	0.0619698	0.771575
Adarb2	-0.550796	-2.11834	-0.817504	-3.54812	-1.57008	0.485567	-2.19623	-2.1751	0.454074	2.03719	0.0619777	0.771575
Gm12632	1.96918	1.38398	2.1424	2.93084	0.946382	1.27894	0	0	0.178871	2.6097	0.0619964	0.771575
Gm19710	-1.69061	-0.9662	-1.48318	-1.96568	-3.07927	-3.07927	-1.07568	-3.07927	0.194408	2.62657	0.0620071	0.771575
CJ186046Rik	-2.00382	-2.01598	-1.43548	-3.39972	-0.00817086	-0.642504	-2.03298	-1.96991	0.325253	2.03623	0.0621013	0.772347
Rpa3	-0.608375	-0.584699	-0.293473	-0.739752	0.000266025	-0.182483	-0.206668	-0.194398	3.80765	2.01737	0.0622481	0.773536
Vax1	0.793741	-1.84886	2.11243	-0.585795	1.54209	1.35735	1.25766	1.60929	0.505535	2.03473	0.0622939	0.773536
Gm32336	-1.4345	-1.4345	0.768019	1.18361	-1.4345	-1.4345	0.25786	-1.4345	0.143506	2.17449	0.062295	0.773536
Tex26	-0.612103	-2.48279	-2.62247	-0.0166794	-0.950688	-3.54433	0.0161327	-0.885588	1.70384	2.01605	0.0624215	0.773536
Rin2	1.11192	-0.0492477	-0.789228	-0.654749	0.25908	0.575989	0.329485	0.354402	3.59568	2.01585	0.0624481	0.773536
H2bu1-ps	-1.34931	-2.72022	-0.654002	-1.4263	-2.72022	-2.72022	-2.72022	-0.705657	0.156693	2.30065	0.0624593	0.773536
Gm52150	2.52495	1.43756	0	0	0	0	0	0	0.0851846	2.37586	0.0624958	0.773536
Pdia5	-0.654862	0.0041678	0.446823	-1.66911	1.03214	-0.441459	0.0245238	-3.01523	1.09893	2.01512	0.0625436	0.773536
Tesk1	0.559682	0.620384	0.395258	-0.0101083	-0.640231	0.664321	-1.60736	0.113458	1.25201	2.01428	0.0626551	0.773536
Acsbg2	0	3.42267	0	0	0	0	0	0	0.110973	2.6176	0.0626713	0.773536
Gm14308	0	3.42267	0	0	0	0	0	0	0.110973	2.6176	0.0626713	0.773536
Gm14434	0	3.42267	0	0	0	0	0	0	0.110973	2.6176	0.0626713	0.773536
Hdac10	0	3.42267	0	0	0	0	0	0	0.110973	2.6176	0.0626713	0.773536
Dna2	1.30705	0	0	0	2.12772	0	1.22912	2.83134	0.139572	2.17052	0.0627312	0.773536
Syndig1	-2.12792	-0.500341	0.347744	0.405505	-0.0281707	0.877538	0.0546866	-3.2908	2.38264	2.01365	0.0627388	0.773536
Atg9b	-0.263884	1.63696	0.405	-0.461079	1.53617	0.356525	-0.293924	-1.66007	0.297696	2.03124	0.0627435	0.773536
Gm21040	1.86467	2.11352	1.59395	0	0	0	0	2.01419	0.118955	2.95273	0.0627462	0.773536
Gm31204	-2.74332	-1.86694	-1.48172	-1.98016	-1.54653	-2.85604	-1.00633	-2.27465	0.786736	2.0131	0.0628109	0.773935
LOC118568543	-1.96407	0.636535	-1.96407	-1.96407	-1.96407	-1.96407	-0.575926	-1.96407	0.116244	2.36736	0.0629048	0.774694
Gm5200	-1.09491	0.289068	-1.09491	-1.09491	1.1613	-1.09491	1.93234	1.00227	0.177621	2.66579	0.0629827	0.774965
Gm52629	-0.211048	-0.664196	-2.1143	-1.86926	-2.22305	-1.89383	-0.306953	-3.17159	0.299227	2.09869	0.0629979	0.774965
Gm33294	-3.54536	-3.54536	-3.54536	-1.51683	-3.54536	-3.54536	-3.54536	-3.54536	0.148497	2.3698	0.0630399	0.774965
Aak1	-0.199182	0.171408	0.0256795	1.1984	-0.512377	0.157537	0.190801	-0.9249	7.21437	2.01112	0.0630737	0.774965
Dgka	-0.875282	0.934184	-0.933129	0.229692	-0.361774	0.973655	-1.48868	-4.73099	2.33547	2.01094	0.0630972	0.774965
Pim1	1.90656	-1.41867	2.07936	1.77782	1.42253	-1.41867	0.533645	1.02991	0.400453	2.04996	0.0631543	0.774965
Milr1	-3.6459	-0.076271	-0.86261	-1.32798	-0.388931	-0.0818395	-2.26301	-5.01188	1.07882	2.02787	0.0631814	0.774965
Trpc1	0.840406	0.40318	2.02337	1.06411	2.05985	1.55575	0.908309	-2.63618	2.52683	2.01015	0.0632025	0.774965
Otoa	0.916547	-1.37224	-1.73574	0.0879841	-2.80299	0.277151	-0.826803	0.619435	0.426947	2.02759	0.0632182	0.774965
Hr	-0.795597	-2.23423	-0.242275	1.1651	1.45729	1.81796	1.00934	1.0674	1.19282	2.0092	0.0633292	0.775472
Fam47e	-0.740124	-0.990967	-2.08693	-0.959807	-4.07149	-2.73184	-2.38285	-2.69775	0.459353	2.02671	0.0633325	0.775472
Slc4a8	-0.509071	-1.00421	0.912526	0.430687	-0.88184	-1.24306	-0.29098	-2.38029	0.707225	2.00884	0.0633777	0.775472
Gm32483	0	0	1.83223	1.11305	1.31595	0	2.7488	1.43046	0.141977	2.47323	0.0633891	0.775472
Cracr2a	0	0	3.18932	0	0	0	0	0	0.0888409	2.6055	0.0635561	0.775863
Ephx1	0	0	0	1.20137	2.06515	2.40206	0	0	0.110537	2.23882	0.0636069	0.775863
Nox4	2.49064	1.38406	0	0	0	2.73365	0	0	0.135854	2.23882	0.0636071	0.775863
Cntn5	-1.92124	-2.39116	-2.19973	-2.8236	-2.12782	-5.06448	-0.864227	-3.85117	3.41043	2.00712	0.0636081	0.775863
Mios	-0.898421	-1.33596	-0.847456	-1.05292	-0.185629	-0.00266976	0.302259	-3.90693	2.47535	2.00695	0.063631	0.775863
Tbrg3	1.26934	1.39164	0	0	0	0	2.45999	0	0.0960059	2.67476	0.0636442	0.775863
9130008F23Rik	-1.65545	-1.65545	-0.602025	-1.65545	0.391417	-0.560578	-1.65545	-1.65545	0.0890471	2.55075	0.0636514	0.775863
Eif4ebp2	0.354612	-0.434849	-0.550632	-0.304141	0.362396	-0.681447	0.876122	-1.52169	0.981237	2.00606	0.0637498	0.775863
Rrs1	0.36786	1.72238	0.265243	-0.586435	0.726982	1.20866	0.199127	-1.57746	0.721951	2.00561	0.0638104	0.775863
Gm34266	-0.215751	1.02583	-2.08809	0.822054	0.219578	-0.194287	0.0652228	1.93921	0.414454	2.02304	0.0638146	0.775863
Camk2a	0.485406	0.0721411	0.280499	-0.0575313	0.0977665	1.04375	0.0399213	0.262631	5.53158	2.00551	0.0638236	0.775863
Hrh2	-1.09346	-1.09346	-1.09346	-1.09346	-1.09346	0.969035	-1.09346	0.971392	0.0910709	2.61098	0.0638266	0.775863
Slpi	0	3.44828	0	0	0	0	0	0	0.112152	2.60162	0.0638424	0.775863
Nhlrc2	-1.45231	-0.465523	-1.57914	0.494756	-2.29265	-2.10756	-0.501722	-2.58108	0.879636	2.00495	0.0638994	0.775916
4930432K21Rik	1.23224	0.968551	1.63231	-0.799973	0.902999	0.415446	0.869307	-1.42199	2.09215	2.00484	0.0639137	0.775916
Gm32391	1.96919	0	2.23544	2.61985	0	1.11384	1.36279	1.33259	0.16584	2.07157	0.0639439	0.775916
LOC118568563	1.30703	2.90515	1.89846	0	2.96305	0	2.08415	0	0.212298	2.10641	0.0641848	0.778222
Il12a	-0.883561	-2.08936	-2.08936	-0.818301	0.34549	-0.993913	-2.08936	-2.08936	0.134337	2.10615	0.064216	0.778222
LOC118567516	-1.94801	-1.94801	-0.35273	-1.94801	-1.94801	0.652115	-0.585262	0.353066	0.164176	2.10602	0.0642315	0.778222
Ldb3	0.24624	-2.25973	-1.7385	0.233611	0.25466	-2.29105	-1.54871	-3.64653	1.60483	2.00083	0.0644572	0.779371
Gsdma	0.111666	-1.09391	0.334201	-1.09391	1.3827	-1.09391	0.0396964	-1.09391	0.116314	2.3797	0.0644714	0.779371
Mtcl1	-0.503365	-0.391863	0.0551489	1.56202	0.611419	-0.67892	-1.71351	-2.01827	1.85081	2.00049	0.0645022	0.779371
Nat2	-1.09445	1.47516	-1.09445	0.0186697	-1.09445	0.0192241	1.50868	-1.09445	0.148367	2.32618	0.0645035	0.779371
Gm7063	0	0	2.22837	1.84239	0	0	1.69258	0	0.100684	2.95728	0.0645307	0.779371
Gm12059	0	0	0	0	2.04662	2.03315	0	0	0.0837757	2.35284	0.0645913	0.779371
Gm41358	1.26948	0	1.05422	0	0	2.56798	2.04157	0	0.125453	2.71677	0.0645987	0.779371
Tmem44	2.56486	-2.67499	-0.536724	1.28217	1.90373	2.84447	2.28797	1.90877	2.0923	1.9997	0.0646095	0.779371
Tm7sf3	-3.41977	-1.11665	-2.35428	0.101631	-0.166308	-1.04599	-1.44711	-1.40005	0.406582	2.01696	0.0646193	0.779371
Sgpp2	-3.92874	0.292794	-0.485337	-2.72875	0.899303	-1.24811	-0.996549	-0.0504771	0.77686	2.0167	0.0646538	0.779394
BC048679	0	0	0	0	0	2.84885	0	0	0.0875272	2.5893	0.0647616	0.780301
Rbpms2	-1.68504	0.130347	1.81558	1.22992	2.12123	1.06066	2.17289	0.706494	1.47172	1.99799	0.0648431	0.780546
Cdh3	1.30701	1.38379	2.97621	3.07144	2.78178	1.80227	1.95615	1.3335	0.291862	2.01525	0.0648472	0.780546
Gm14698	1.8302	1.00188	-1.90052	0.72098	1.50464	1.30164	1.22941	0.988949	0.519407	2.13392	0.064914	0.780676
Gm14766	-0.569282	-0.682986	-0.335907	-0.729121	0.037556	-0.211853	-0.266755	-0.160561	3.73005	1.99718	0.0649546	0.780676
Chrna1	-0.184563	-0.51437	-4.33966	-0.465409	-1.36608	-0.624274	-0.3292	-0.50469	0.853364	2.01412	0.0649981	0.780676
Gm17882	0.720101	-1.80645	-1.80645	-0.60506	-1.80645	-1.80645	0.23419	-0.435466	0.150491	2.09953	0.0650118	0.780676
Elac2	-0.397344	2.01402	0.343846	1.47452	1.07559	1.97246	2.29905	1.25582	2.40401	1.99669	0.065021	0.780676
Ncmap	-4.06547	0.160644	-1.55909	-1.09711	0.609664	-1.32786	0.954652	-0.53038	1.71586	1.99619	0.0650899	0.780871
AB010352	-0.972039	-0.843166	-0.934744	-0.632879	0.622072	-2.28365	-0.568371	-3.40505	0.4748	2.01334	0.0651025	0.780871
Naa40	-0.126903	0.55609	0.990994	1.48227	0.541027	-0.040619	0.450275	-2.6098	0.557107	2.01308	0.0651382	0.780887
Lmx1b	-1.09531	0.167286	-1.09531	1.52467	-1.09531	1.30872	1.29766	1.00128	0.204422	2.0618	0.065169	0.780887
Kng1	0	0	0	2.91848	0.94442	0	0	0	0.0909143	2.34606	0.065222	0.780981
[truncated: 21,942 more rows]

## Sheet: Biodare Rhythmimcity Analysis
Experiment ID	20553
Experiment name	Siberian_Hamster_Arcuate_Sequencing
Job	ff3d0282-2053-457e-a1ea-fec4d4b8f070
Method	BD2 eJTK
Submitted	2021-11-02T13:21:27.463735007	Finished	2021-11-02T13:21:28.260548856
NULL_SIZE	100000
DW_END	0
PERIOD_MIN	18
DATA_SET_ID	20553_NO_DTR
PERIOD_MAX	35
DW_START	0
PRESET	BD2_CLASSIC
METHOD	BD2EJTK
DATA_SET_TYPE_NAME	no dtr
PARAMS_SUMMARY	no dtr min-max p(18.0-35.0)
DATA_SET_TYPE	NO_DTR
Individual Results
Data Id	Data Label		tau	emp p	emp p BH Corrected	Pattern Shape	Pattern Period	Pattern Peak	P. Trough	P. Circ. Peak	P. Circ. Trough	P. Width	P. Asym		JTK p from tau	JTK p BH Corrected	bf corrected JTK p	BH bf corrected p
1	Tshb		0.620729	1e-05	0.000525	SPIKE	28	0	14	0	12	9.33	0.5		1.72e-11	5.71e-09	5.17e-08	1.72e-05
2	Upp2		0.553975	1e-05	0.000525	SPIKE	33	0	16.5	0	12	8.25	0.5		1.67e-09	1.26e-07	5.03e-06	0.000379
6	Sugct		0.606667	1e-05	0.000525	SPIKE	32	8	24	6	18	10.67	0.5		4.69e-11	1.17e-08	1.41e-07	3.52e-05
7	Dhrs7c		0.557937	1e-05	0.000525	ACOS	32	5.33	0	4	0	32	0.17		1.29e-09	1.17e-07	3.88e-06	0.000352
8	Chrna3		0.544043	1e-05	0.000525	ACOS	30	5	0	4	0	30	0.17		3.16e-09	1.97e-07	9.52e-06	0.000594
31	Dio3		0.575939	1e-05	0.000525	SPIKE	32	8	24	6	18	10.67	0.5		3.91e-10	6.5e-08	1.18e-06	0.000196
186	Akr1b8		0.666746	1e-05	0.000525	SPIKE	35	32.08	14.58	22	10	5.83	0.5		5.47e-13	5.46e-10	1.65e-09	1.65e-06
208	Mutyh		0.564567	1e-05	0.000525	SPIKE	18	13.5	4.5	18	6	3	0.5		8.34e-10	9.25e-08	2.51e-06	0.000279
216	Prss8		0.57067	1e-05	0.000525	SPIKE	18	0	9	0	12	3	0.5		5.56e-10	6.94e-08	1.68e-06	0.000209
243	Grhl1		0.57619	1e-05	0.000525	SPIKE	20	11.67	1.67	14	2	6.67	0.5		3.84e-10	6.5e-08	1.16e-06	0.000196
258	Gm46721		0.554348	1e-05	0.000525	SPIKE	24	12	0	12	0	8	0.5		1.63e-09	1.26e-07	4.91e-06	0.000379
299	Fhl4		0.558953	1e-05	0.000525	SPIKE	32	8	26	6	19.5	8	0.25		1.21e-09	1.17e-07	3.63e-06	0.000352
342	Gm33858		0.537215	1e-05	0.000525	SPIKE	24	4	16	4	16	6	0.5		4.87e-09	2.74e-07	1.47e-05	0.000824
390	Gm46122		0.537008	1e-05	0.000525	SPIKE	20	5	13.75	6	16.5	5	0.75		4.93e-09	2.74e-07	1.49e-05	0.000824
676	Gm8273		0.636415	1e-05	0.000525	SPIKE	35	32.08	14.58	22	10	5.83	0.5		5.44e-12	2.72e-09	1.64e-08	8.18e-06
765	Aldh3a1		0.552052	1e-05	0.000525	SPIKE	18	0	9	0	12	3	0.5		1.89e-09	1.26e-07	5.69e-06	0.000379
912	Inca1		0.552052	1e-05	0.000525	SPIKE	18	4.5	13.5	6	18	3	0.5		1.89e-09	1.26e-07	5.69e-06	0.000379
931	P2ry2		0.57067	1e-05	0.000525	SPIKE	18	4.5	13.5	6	18	3	0.5		5.56e-10	6.94e-08	1.68e-06	0.000209
972	Wnt16		0.533002	1e-05	0.000525	SPIKE	35	32.08	14.58	22	10	5.83	0.5		6.34e-09	3.33e-07	1.91e-05	0.001004
20	Prr32		0.525666	2e-05	0.000868	ACOS	35	5.83	0	4	0	35	0.17		1e-08	4.34e-07	3.01e-05	0.001308
222	Dok2		0.528268	2e-05	0.000868	SPIKE	24	14	0.5	14	0.5	6	0.75		8.52e-09	4.16e-07	2.57e-05	0.001253
503	Gm45933		0.52708	2e-05	0.000868	SPIKE	24	12	0	12	0	8	0.5		9.17e-09	4.16e-07	2.76e-05	0.001253
966	Gm52428		0.527649	2e-05	0.000868	SPIKE	35	32.08	12.4	22	8.5	8.75	0.75		8.85e-09	4.16e-07	2.67e-05	0.001253
321	Gm5134		0.521162	3e-05	0.001198	SPIKE	29	12.08	24.77	10	20.5	7.25	0.75		1.32e-08	5.27e-07	3.98e-05	0.001587
335	Pinlyp		0.521632	3e-05	0.001198	SPIKE	18	12	1.88	16	2.5	4.5	0.75		1.28e-08	5.27e-07	3.86e-05	0.001587
11	Nmu		0.507856	6e-05	0.001618	SPIKE	35	0	19.69	0	13.5	8.75	0.25		2.95e-08	8.41e-07	8.89e-05	0.002535
51	Actr5		0.509229	6e-05	0.001618	SPIKE	24	12	0	12	0	8	0.5		2.72e-08	8.04e-07	8.19e-05	0.002424
52	Crabp1		0.509609	6e-05	0.001618	ACOS	34	31.17	2.83	22	2	34	0.83		2.66e-08	8.04e-07	8e-05	0.002424
66	Lama1		0.509496	6e-05	0.001618	SPIKE	24	12	0	12	0	8	0.5		2.67e-08	8.04e-07	8.06e-05	0.002424
178	Rubcnl		0.516688	5e-05	0.001618	SPIKE	18	10.5	0.38	14	0.5	4.5	0.75		1.73e-08	6.56e-07	5.22e-05	0.001976
239	Tbc1d10c		0.50545	6e-05	0.001618	SPIKE	26	0	14.62	0	13.5	6.5	0.25		3.41e-08	9.11e-07	0.000103	0.002744
277	Gm7690		0.50909	6e-05	0.001618	SPIKE	22	3.67	13.29	4	14.5	5.5	0.75		2.74e-08	8.04e-07	8.26e-05	0.002424
612	Ticam2		0.515701	6e-05	0.001618	SPIKE	35	2.92	20.42	2	14	8.75	0.5		1.84e-08	6.56e-07	5.54e-05	0.001976
669	Gm34232		0.511779	6e-05	0.001618	SPIKE	24	4	16	4	16	6	0.5		2.33e-08	8.03e-07	7.03e-05	0.002418
673	Pcdhb20		0.506612	6e-05	0.001618	SPIKE	18	4.5	12.38	6	16.5	4.5	0.75		3.18e-08	8.81e-07	9.57e-05	0.002654
874	Epsti1		0.509229	6e-05	0.001618	SPIKE	34	28.33	11.33	20	8	5.67	0.5		2.72e-08	8.04e-07	8.19e-05	0.002424
922	Gm35232		0.515701	6e-05	0.001618	SPIKE	18	7.5	15.38	10	20.5	4.5	0.75		1.84e-08	6.56e-07	5.54e-05	0.001976
27	A630039O03Rik		0.503862	7e-05	0.001625	SPIKE	26	4.33	17.33	4	16	4.33	0.5		3.74e-08	9.11e-07	0.000113	0.002744
86	Ccdc162		0.501848	7e-05	0.001625	SPIKE	18	0	9	0	12	3	0.5		4.22e-08	9.78e-07	0.000127	0.002948
193	Whamm		0.504101	7e-05	0.001625	SPIKE	25	4.17	16.67	4	16	4.17	0.5		3.69e-08	9.11e-07	0.000111	0.002744
476	Kcnrg		0.504115	7e-05	0.001625	SPIKE	20	11.67	1.67	14	2	6.67	0.5		3.69e-08	9.11e-07	0.000111	0.002744
732	Dock2		0.501848	7e-05	0.001625	SPIKE	35	32.08	14.58	22	10	5.83	0.5		4.22e-08	9.78e-07	0.000127	0.002948
815	Cyp11a1		0.504115	7e-05	0.001625	SPIKE	20	8.33	17.08	10	20.5	5	0.75		3.69e-08	9.11e-07	0.000111	0.002744
42	Hspb7		0.497298	9e-05	0.001911	ACOS	31	5.17	0	4	0	31	0.17		5.51e-08	1.17e-06	0.000166	0.003525
53	Aif1l		0.499268	9e-05	0.001911	COS	32	0	16	0	12	32	0.5		4.91e-08	1.11e-06	0.000148	0.003332
82	Ppp1r1b		0.498197	9e-05	0.001911	SPIKE	34	28.33	13.46	20	9.5	8.5	0.25		5.23e-08	1.13e-06	0.000157	0.003417
482	4933424G06Rik		0.498997	9e-05	0.001911	SPIKE	20	5	13.75	6	16.5	5	0.75		4.99e-08	1.11e-06	0.00015	0.003332
37	Cga		0.496529	0.0001	0.002079	SPIKE	31	0	13.56	0	10.5	7.75	0.75		5.76e-08	1.2e-06	0.000174	0.00361
158	Mocos		0.495846	0.00013	0.002648	SPIKE	32	16	0	12	0	8	0.5		6e-08	1.22e-06	0.000181	0.003681
77	Rbm12b1		0.494413	0.00014	0.002794	SPIKE	18	4.5	12.38	6	16.5	4.5	0.75		6.52e-08	1.3e-06	0.000196	0.003921
592	Lcn3		0.491807	0.00015	0.002935	SPIKE	35	32.08	12.4	22	8.5	8.75	0.75		7.59e-08	1.48e-06	0.000229	0.004473
92	Fkbp6		0.491078	0.00016	0.003071	SPIKE	18	4.5	13.5	6	18	3	0.5		7.91e-08	1.52e-06	0.000238	0.004576
451	Gm39090		0.487088	0.0002	0.003629	SPIKE	18	4.5	13.5	6	18	3	0.5		9.96e-08	1.81e-06	0.0003	0.005446
467	Plk4		0.487299	0.0002	0.003629	SPIKE	24	12	0	12	0	8	0.5		9.84e-08	1.81e-06	0.000296	0.005446
782	Mki67		0.487088	0.0002	0.003629	SPIKE	24	10	23.5	10	23.5	6	0.25		9.96e-08	1.81e-06	0.0003	0.005446
210	Cd44		0.482808	0.00022	0.003921	SPIKE	35	8.75	26.25	6	18	11.67	0.5		1.27e-07	2.25e-06	0.000383	0.006781
93	Cryab		0.480514	0.00024	0.003992	ACOS	32	8	26.67	6	20	32	0.42		1.45e-07	2.49e-06	0.000437	0.007515
174	Fhod1		0.482628	0.00023	0.003992	SPIKE	18	0	9	0	12	3	0.5		1.29e-07	2.25e-06	0.000387	0.006781
405	Cited4		0.479515	0.00024	0.003992	SPIKE	32	8	24	6	18	10.67	0.5		1.53e-07	2.55e-06	0.000462	0.007688
813	Ttk		0.479708	0.00024	0.003992	SPIKE	32	5.33	21.33	4	16	5.33	0.5		1.52e-07	2.55e-06	0.000457	0.007688
194	4930469K13Rik		0.477308	0.00026	0.004254	SPIKE	22	5.5	17.88	6	19.5	5.5	0.25		1.74e-07	2.84e-06	0.000524	0.008565
33	Plxnb3		0.476879	0.00027	0.004346	SPIKE	30	2.5	17.5	2	14	5	0.5		1.78e-07	2.87e-06	0.000536	0.008633
892	Plekhb1		0.475447	0.00028	0.004436	SPIKE	33	0	16.5	0	12	8.25	0.5		1.93e-07	3.06e-06	0.000581	0.009209
766	Tcap		0.473453	0.00032	0.00499	SPIKE	32	8	26	6	19.5	8	0.25		2.16e-07	3.36e-06	0.00065	0.010137
135	Tfpi		0.472536	0.00038	0.005834	SPIKE	28	0	14	0	12	9.33	0.5		2.27e-07	3.49e-06	0.000684	0.010506
347	Dkk4		0.471782	0.0004	0.005958	SPIKE	22	3.67	14.67	4	16	5.5	0.5		2.37e-07	3.56e-06	0.000714	0.010729
587	Xrra1		0.471616	0.0004	0.005958	SPIKE	26	4.33	17.33	4	16	6.5	0.5		2.39e-07	3.56e-06	0.00072	0.010729
19	Arntl2		0.468538	0.00048	0.007045	SPIKE	34	28.33	11.33	20	8	8.5	0.5		2.84e-07	4.16e-06	0.000855	0.012543
374	Lsm14b		0.466794	0.00052	0.007521	SPIKE	19	15.83	5.15	20	6.5	4.75	0.75		3.12e-07	4.52e-06	0.000941	0.013612
16	Cby2		0.465567	0.00053	0.007556	SPIKE	32	8	24	6	18	8	0.5		3.34e-07	4.77e-06	0.001007	0.014357
704	Gpr50		0.465123	0.00057	0.008012	SPIKE	29	0	16.31	0	13.5	7.25	0.25		3.42e-07	4.81e-06	0.001032	0.014505
181	Lama3		0.461685	0.00067	0.008464	SPIKE	21	0	9.19	0	10.5	5.25	0.75		4.14e-07	5.22e-06	0.001246	0.01574
189	Ntf3		0.463232	0.00063	0.008464	SPIKE	18	12	1.88	16	2.5	4.5	0.75		3.8e-07	5.22e-06	0.001145	0.01574
398	Htr1d		0.461685	0.00067	0.008464	SPIKE	32	8	22	6	16.5	8	0.75		4.14e-07	5.22e-06	0.001246	0.01574
635	Ly6g6e		0.461685	0.00067	0.008464	SPIKE	18	12	1.88	16	2.5	4.5	0.75		4.14e-07	5.22e-06	0.001246	0.01574
640	Adcy10		0.461685	0.00067	0.008464	SPIKE	19	6.33	14.65	8	18.5	4.75	0.75		4.14e-07	5.22e-06	0.001246	0.01574
887	Gvin-ps1		0.461685	0.00067	0.008464	SPIKE	23	3.83	15.33	4	16	3.83	0.5		4.14e-07	5.22e-06	0.001246	0.01574
889	Scnn1a		0.461685	0.00067	0.008464	SPIKE	18	12	4.12	16	5.5	4.5	0.25		4.14e-07	5.22e-06	0.001246	0.01574
901	Gm34678		0.461685	0.00067	0.008464	SPIKE	22	3.67	14.67	4	16	3.67	0.5		4.14e-07	5.22e-06	0.001246	0.01574
25	Tfpi2		0.460347	0.0007	0.008657	SPIKE	18	4.5	12.38	6	16.5	4.5	0.75		4.45e-07	5.55e-06	0.00134	0.016721
261	Kcnn2		0.459123	0.00072	0.008657	SPIKE	19	9.5	0	12	0	6.33	0.5		4.75e-07	5.86e-06	0.001433	0.017652
820	9430083A17Rik		0.458613	0.00072	0.008657	SPIKE	24	0	12	0	12	4	0.5		4.89e-07	5.95e-06	0.001473	0.017912
961	Gm46194		0.458404	0.00072	0.008657	SPIKE	25	6.25	17.19	6	16.5	6.25	0.75		4.94e-07	5.95e-06	0.00149	0.017912
668	Vwce		0.457143	0.00076	0.009029	SPIKE	20	5	13.75	6	16.5	5	0.75		5.29e-07	6.19e-06	0.001595	0.018657
418	Gm51252		0.456784	0.0008	0.009073	NSPIKE	32	16	0	12	0	21.33	0.5		5.4e-07	6.19e-06	0.001626	0.018657
465	Gm25848		0.456553	0.0008	0.009073	SPIKE	20	10	1.25	12	1.5	5	0.25		5.47e-07	6.2e-06	0.001647	0.018676
621	Tmem221		0.45707	0.00078	0.009073	SPIKE	18	12	1.88	16	2.5	4.5	0.75		5.31e-07	6.19e-06	0.001601	0.018657
653	Gm13186		0.456874	0.0008	0.009073	NSPIKE	20	11.25	0	13.5	0	15	0.75		5.37e-07	6.19e-06	0.001618	0.018657
835	Large2		0.454794	0.0009	0.010092	SPIKE	18	4.5	12.38	6	16.5	4.5	0.75		6.01e-07	6.74e-06	0.001811	0.020306
15	Plac1		0.44894	0.00104	0.010176	SPIKE	30	0	13.12	0	10.5	7.5	0.75		8.22e-07	8.05e-06	0.002478	0.024242
22	Rbp1		0.451195	0.00098	0.010176	SPIKE	33	0	16.5	0	12	11	0.5		7.29e-07	7.72e-06	0.002197	0.023271
218	4933407O12Rik		0.450843	0.00098	0.010176	SPIKE	18	0	7.88	0	10.5	4.5	0.75		7.43e-07	7.72e-06	0.002238	0.023271
354	Fermt1		0.451306	0.00097	0.010176	SPIKE	35	2.92	20.42	2	14	11.67	0.5		7.25e-07	7.72e-06	0.002184	0.023271
376	Kynu		0.450843	0.00098	0.010176	SPIKE	27	9	24.19	8	21.5	6.75	0.25		7.43e-07	7.72e-06	0.002238	0.023271
552	Calcoco2		0.449428	0.00103	0.010176	SPIKE	35	0	19.69	0	13.5	8.75	0.25		8.01e-07	7.95e-06	0.002414	0.023942
628	Slc17a8		0.450348	0.001	0.010176	SPIKE	18	0	9	0	12	3	0.5		7.63e-07	7.85e-06	0.002299	0.023649
654	Gm6203		0.449678	0.00103	0.010176	SPIKE	20	5	13.75	6	16.5	5	0.75		7.91e-07	7.95e-06	0.002382	0.023942
687	Ppp1r1a		0.450956	0.00098	0.010176	SPIKE	18	13.5	5.62	18	7.5	4.5	0.25		7.38e-07	7.72e-06	0.002225	0.023271
695	Kremen2		0.449359	0.00103	0.010176	SPIKE	27	18	4.5	16	4	9	0.5		8.04e-07	7.95e-06	0.002423	0.023942
828	Gm32249		0.452873	0.00092	0.010176	SPIKE	26	4.33	17.33	4	16	4.33	0.5		6.66e-07	7.39e-06	0.002008	0.022266
841	Erbb3		0.4525	0.00096	0.010176	SPIKE	35	2.92	18.23	2	12.5	8.75	0.75		6.8e-07	7.46e-06	0.002048	0.022465
895	Rem2		0.449359	0.00103	0.010176	SPIKE	28	21	8.75	18	7.5	7	0.25		8.04e-07	7.95e-06	0.002423	0.023942
60	Ttf2		0.44668	0.00112	0.010446	SPIKE	24	2	14	2	14	6	0.5		9.27e-07	8.85e-06	0.002794	0.026667
288	Gm5306		0.447241	0.00112	0.010446	SPIKE	32	8	26	6	19.5	8	0.25		9e-07	8.72e-06	0.002712	0.026275
516	4930445E18Rik		0.446242	0.00112	0.010446	SPIKE	29	4.83	21.15	4	17.5	7.25	0.25		9.49e-07	8.85e-06	0.002859	0.026667
745	Tmem119		0.446308	0.00112	0.010446	SPIKE	24	6	16.5	6	16.5	6	0.75		9.46e-07	8.85e-06	0.002849	0.026667
747	Ltbp2		0.446308	0.00112	0.010446	SPIKE	28	0	14	0	12	7	0.5		9.46e-07	8.85e-06	0.002849	0.026667
271	Gm36804		0.445602	0.00122	0.011274	SPIKE	18	12	1.88	16	2.5	4.5	0.75		9.82e-07	9.07e-06	0.002958	0.02733
421	Rhebl1		0.44482	0.00128	0.01172	SPIKE	34	28.33	11.33	20	8	11.33	0.5		1.02e-06	9.37e-06	0.003082	0.028221
338	Slco4a1		0.442616	0.00137	0.01243	SPIKE	20	15	3.75	18	4.5	5	0.75		1.15e-06	1.04e-05	0.003462	0.031406
147	Il15		0.441603	0.00143	0.012857	SPIKE	26	4.33	17.33	4	16	4.33	0.5		1.21e-06	1.09e-05	0.003651	0.032824
475	Ttc38		0.441065	0.0015	0.013366	NSPIKE	27	4.5	18	4	16	18	0.5		1.25e-06	1.11e-05	0.003755	0.033459
238	Mef2c		0.440666	0.00152	0.013424	ACOS	28	9.33	25.67	8	22	28	0.42		1.27e-06	1.12e-05	0.003834	0.033863
748	Dennd6b		0.440317	0.00159	0.013919	ACOS	22	1.83	20.17	2	22	22	0.17		1.3e-06	1.13e-05	0.003905	0.03392
598	Hspb1		0.440299	0.00161	0.013972	SPIKE	28	11.67	25.67	10	22	9.33	0.5		1.3e-06	1.13e-05	0.003909	0.03392
491	Cst3		0.439389	0.00164	0.01411	SPIKE	32	8	24	6	18	10.67	0.5		1.36e-06	1.17e-05	0.004099	0.035265
248	Aldh1a1		0.436985	0.00177	0.014246	SPIKE	34	0	17	0	12	5.67	0.5		1.54e-06	1.24e-05	0.004645	0.037387
317	Oxtr		0.437732	0.00175	0.014246	SPIKE	34	28.33	11.33	20	8	11.33	0.5		1.48e-06	1.23e-05	0.004469	0.037163
505	Cklf		0.437886	0.00175	0.014246	SPIKE	32	0	16	0	12	5.33	0.5		1.47e-06	1.23e-05	0.004433	0.037163
543	Anln		0.437253	0.00176	0.014246	SPIKE	28	0	14	0	12	9.33	0.5		1.52e-06	1.23e-05	0.004581	0.037169
545	Grid2ip		0.437291	0.00176	0.014246	SPIKE	19	6.33	15.83	8	20	4.75	0.5		1.52e-06	1.23e-05	0.004572	0.037169
547	Gm32788		0.437291	0.00176	0.014246	SPIKE	19	3.17	11.48	4	14.5	4.75	0.75		1.52e-06	1.23e-05	0.004572	0.037169
779	Gm4120		0.438675	0.00173	0.014246	SPIKE	21	8.75	20.56	10	23.5	5.25	0.25		1.41e-06	1.2e-05	0.004254	0.03629
982	Ces1d		0.438061	0.00175	0.014246	SPIKE	28	0	14	0	12	7	0.5		1.46e-06	1.23e-05	0.004393	0.03715
76	Sphk1		0.436689	0.00183	0.014611	SPIKE	20	18.33	7.08	22	8.5	5	0.75		1.57e-06	1.25e-05	0.004717	0.037662
242	Fen1		0.436182	0.00191	0.015128	NSPIKE	18	1.88	12	2.5	16	13.5	0.25		1.61e-06	1.27e-05	0.004843	0.038358
344	P3h3		0.432799	0.00213	0.016738	SPIKE	26	2.17	13.54	2	12.5	6.5	0.75		1.91e-06	1.5e-05	0.005767	0.045321
62	Plekhg3		0.431607	0.00228	0.017639	SPIKE	24	6	16.5	6	16.5	6	0.75		2.04e-06	1.57e-05	0.006132	0.047437
456	Sec14l5		0.432121	0.00227	0.017639	SPIKE	24	14	0.5	14	0.5	6	0.75		1.98e-06	1.55e-05	0.005972	0.046564
646	Efcab12		0.43082	0.00231	0.017734	SPIKE	35	32.08	14.58	22	10	5.83	0.5		2.12e-06	1.62e-05	0.006384	0.048924
14	Npas1		0.430706	0.00237	0.018055	SPIKE	32	24	8	18	6	8	0.5		2.13e-06	1.62e-05	0.006422	0.048924
753	LOC118567948		0.429919	0.00244	0.018448	SPIKE	32	5.33	21.33	4	16	5.33	0.5		2.22e-06	1.68e-05	0.006686	0.050549
634	Gm8125		0.426627	0.00269	0.020185	NSPIKE	22	11	0	12	0	16.5	0.5		2.62e-06	1.97e-05	0.007907	0.059332
712	Aldh16a1		0.425705	0.00274	0.020407	SPIKE	18	0	9	0	12	3	0.5		2.75e-06	2.05e-05	0.008286	0.061708
769	Gm4852		0.425456	0.0028	0.020699	SPIKE	22	3.67	14.67	4	16	3.67	0.5		2.78e-06	2.06e-05	0.008391	0.062029
29	Prr18		0.424517	0.00293	0.021037	SPIKE	24	12	0	12	0	8	0.5		2.92e-06	2.1e-05	0.008799	0.063177
400	Ubap1l		0.42475	0.00292	0.021037	SPIKE	24	6	16.5	6	16.5	6	0.75		2.89e-06	2.1e-05	0.008696	0.063177
433	Gm12592		0.424517	0.00293	0.021037	SPIKE	32	16	0	12	0	8	0.5		2.92e-06	2.1e-05	0.008799	0.063177
531	Calr3		0.424592	0.00293	0.021037	SPIKE	24	0	13.5	0	13.5	6	0.25		2.91e-06	2.1e-05	0.008766	0.063177
125	Rbp4		0.423843	0.00301	0.021305	SPIKE	18	0	9	0	12	3	0.5		3.02e-06	2.14e-05	0.009104	0.064438
557	Card9		0.423888	0.00301	0.021305	SPIKE	34	28.33	11.33	20	8	8.5	0.5		3.01e-06	2.14e-05	0.009083	0.064438
284	2610307P16Rik		0.421687	0.00324	0.022455	SPIKE	18	10.5	1.5	14	2	4.5	0.5		3.37e-06	2.33e-05	0.010148	0.070331
352	Csgalnact1		0.421872	0.00323	0.022455	SPIKE	26	0	13	0	12	8.67	0.5		3.34e-06	2.33e-05	0.010054	0.070167
989	Ifitm5		0.421875	0.00323	0.022455	NSPIKE	20	11.67	1.67	14	2	15	0.5		3.34e-06	2.33e-05	0.010052	0.070167
149	Hspb2		0.421323	0.00339	0.023332	ACOS	31	5.17	2.58	4	2	31	0.08		3.43e-06	2.36e-05	0.010335	0.071133
116	Sting1		0.420117	0.00366	0.024514	SPIKE	34	2.83	19.83	2	14	8.5	0.5		3.64e-06	2.44e-05	0.010979	0.073538
273	Rai14		0.420783	0.00365	0.024514	SPIKE	23	9.58	21.08	10	22	7.67	0.5		3.52e-06	2.39e-05	0.010619	0.072093
560	Zfp759		0.42089	0.00365	0.024514	SPIKE	34	31.17	14.17	22	10	5.67	0.5		3.51e-06	2.39e-05	0.010562	0.072093
774	AA386476		0.420222	0.00366	0.024514	ACOS	28	18.67	7	16	6	28	0.42		3.62e-06	2.44e-05	0.010922	0.073538
464	LOC118567768		0.419964	0.00369	0.024551	SPIKE	26	4.33	17.33	4	16	4.33	0.5		3.67e-06	2.44e-05	0.011064	0.073611
59	Evc2		0.417868	0.00414	0.027362	SPIKE	18	10.5	1.5	14	2	4.5	0.5		4.08e-06	2.69e-05	0.012285	0.081194
101	Zdhhc23		0.417347	0.00422	0.027707	SPIKE	32	0	16	0	12	10.67	0.5		4.18e-06	2.75e-05	0.012608	0.082779
450	Cd19		0.416378	0.00442	0.028831	SPIKE	32	8	24	6	18	8	0.5		4.39e-06	2.85e-05	0.01323	0.085741
318	Tbl2		0.416117	0.00451	0.028852	NSPIKE	34	29.04	14.17	20.5	10	25.5	0.25		4.45e-06	2.85e-05	0.013402	0.085741
322	Zfp142		0.416292	0.00451	0.028852	NSPIKE	20	8.33	18.33	10	22	13.33	0.5		4.41e-06	2.85e-05	0.013287	0.085741
682	Cbx2		0.416209	0.00451	0.028852	SPIKE	34	25.5	10.62	18	7.5	8.5	0.25		4.43e-06	2.85e-05	0.013341	0.085741
191	Cort		0.41527	0.00477	0.030129	SPIKE	20	13.33	3.33	16	4	6.67	0.5		4.64e-06	2.95e-05	0.013977	0.088849
379	Smim43		0.414502	0.00477	0.030129	SPIKE	32	29.33	13.33	22	10	5.33	0.5		4.82e-06	3.03e-05	0.014518	0.091279
553	Gm2517		0.414469	0.00483	0.030316	SPIKE	32	0	16	0	12	5.33	0.5		4.83e-06	3.03e-05	0.014542	0.091279
842	Cdh9		0.413754	0.00501	0.03125	SPIKE	24	10	20.5	10	20.5	6	0.75		5e-06	3.12e-05	0.015065	0.093968
5	Prr5l		0.412873	0.00518	0.031715	SPIKE	20	5	13.75	6	16.5	5	0.75		5.22e-06	3.2e-05	0.015734	0.096337
69	Rbm12b2		0.413037	0.00517	0.031715	SPIKE	19	6.33	14.65	8	18.5	4.75	0.75		5.18e-06	3.19e-05	0.015608	0.096152
112	LOC115486519		0.413218	0.00517	0.031715	SPIKE	35	2.92	20.42	2	14	8.75	0.5		5.13e-06	3.18e-05	0.015469	0.095891
871	Gstt1		0.411304	0.00575	0.034991	SPIKE	35	5.83	23.33	4	16	8.75	0.5		5.64e-06	3.43e-05	0.016997	0.103434
80	Zfp628		0.409462	0.00633	0.037352	SPIKE	35	32.08	14.58	22	10	5.83	0.5		6.17e-06	3.71e-05	0.018603	0.111842
130	Klc3		0.408726	0.00635	0.037352	SPIKE	33	27.5	11	20	8	11	0.5		6.4e-06	3.82e-05	0.019284	0.115243
151	Mogat1		0.408171	0.0064	0.037352	SPIKE	22	5.5	15.12	6	16.5	5.5	0.75		6.58e-06	3.84e-05	0.019813	0.115633
363	Hs3st3b1		0.408265	0.0064	0.037352	SPIKE	18	12	1.88	16	2.5	4.5	0.75		6.55e-06	3.84e-05	0.019722	0.115633
522	Gm7333		0.40826	0.0064	0.037352	SPIKE	19	11.08	0.4	14	0.5	4.75	0.75		6.55e-06	3.84e-05	0.019728	0.115633
661	Apobec1		0.409462	0.00633	0.037352	SPIKE	24	12	0	12	0	8	0.5		6.17e-06	3.71e-05	0.018603	0.111842
833	Eln		0.408393	0.00635	0.037352	SPIKE	28	7	22.75	6	19.5	7	0.25		6.5e-06	3.84e-05	0.019599	0.115633
806	Zfp560		0.407922	0.0065	0.037715	SPIKE	24	2	12.5	2	12.5	6	0.75		6.66e-06	3.86e-05	0.020055	0.116367
415	Gm6838		0.407566	0.00668	0.038535	SPIKE	24	12	22.5	12	22.5	6	0.75		6.77e-06	3.91e-05	0.020406	0.117715
122	6030458C11Rik		0.407004	0.0069	0.03952	SPIKE	31	28.42	12.92	22	10	10.33	0.5		6.96e-06	3.99e-05	0.020971	0.120283
532	Trp53inp1		0.406703	0.00693	0.03952	SPIKE	18	12	1.88	16	2.5	4.5	0.75		7.06e-06	4.03e-05	0.021281	0.12136
23	Ikbkg		0.405176	0.00728	0.040929	SPIKE	32	16	0	12	0	8	0.5		7.61e-06	4.28e-05	0.022917	0.128822
443	H3c14		0.405176	0.00728	0.040929	SPIKE	18	0	9	0	12	3	0.5		7.61e-06	4.28e-05	0.022917	0.128822
722	H2-Eb2		0.405065	0.0073	0.040929	SPIKE	24	22	10	22	10	8	0.5		7.65e-06	4.28e-05	0.023041	0.128822
641	Ndufb2		0.404999	0.0075	0.041815	ACOS	24	6	20	6	20	24	0.42		7.67e-06	4.28e-05	0.023114	0.128822
257	Tex52		0.404892	0.00764	0.04218	SPIKE	20	1.67	11.67	2	14	6.67	0.5		7.71e-06	4.28e-05	0.023234	0.128822
350	Fshb		0.404387	0.00765	0.04218	SPIKE	21	0	9.19	0	10.5	5.25	0.75		7.9e-06	4.36e-05	0.023809	0.13128
306	Sstr5		0.403128	0.00795	0.043337	ACOS	28	9.33	4.67	8	4	28	0.17		8.4e-06	4.58e-05	0.025301	0.137982
535	Itpr2		0.4034	0.00795	0.043337	SPIKE	28	7	19.25	6	16.5	7	0.75		8.29e-06	4.54e-05	0.024971	0.13693
630	Snx20		0.402905	0.00799	0.043337	SPIKE	19	3.17	11.48	4	14.5	4.75	0.75		8.49e-06	4.6e-05	0.025575	0.138716
123	Oprm1		0.40173	0.00869	0.046184	SPIKE	30	27.5	12.5	22	10	7.5	0.5		8.98e-06	4.82e-05	0.027063	0.145209
603	Gsx1		0.401498	0.00869	0.046184	SPIKE	20	10	0	12	0	6.67	0.5		9.08e-06	4.85e-05	0.027366	0.146052
686	Cldn7		0.400981	0.0087	0.046184	SPIKE	31	0	13.56	0	10.5	7.75	0.75		9.31e-06	4.94e-05	0.028054	0.148922
768	Syt12		0.401836	0.00867	0.046184	SPIKE	35	32.08	16.77	22	11.5	8.75	0.25		8.94e-06	4.82e-05	0.026925	0.145209
285	Iqch		0.400062	0.00911	0.048009	SPIKE	18	12	4.12	16	5.5	4.5	0.25		9.73e-06	5.12e-05	0.029317	0.154244
375	Fbxo30		0.400028	0.00914	0.048009	SPIKE	18	4.5	13.5	6	18	3	0.5		9.75e-06	5.12e-05	0.029365	0.154244
98	Gm14322		0.399333	0.00947	0.048716	SPIKE	20	13.33	2.08	16	2.5	5	0.75		1.01e-05	5.18e-05	0.030357	0.156169
118	Xaf1		0.399835	0.0094	0.048716	SPIKE	18	0	9	0	12	3	0.5		9.84e-06	5.14e-05	0.029636	0.154854
119	Vim		0.399463	0.00943	0.048716	ACOS	31	0	20.67	0	16	31	0.33		1e-05	5.18e-05	0.030169	0.156004
383	Pde3b		0.399516	0.0094	0.048716	SPIKE	25	4.17	16.67	4	16	6.25	0.5		9.99e-06	5.18e-05	0.030092	0.156004
435	4933430I17Rik		0.398398	0.00965	0.049388	SPIKE	25	4.17	16.67	4	16	8.33	0.5		1.05e-05	5.39e-05	0.031742	0.162456
137	Abhd18		0.397915	0.01036	0.052621	ACOS	32	2.67	24	2	18	32	0.33		1.08e-05	5.49e-05	0.032482	0.165393
446	Mmp28		0.396863	0.01044	0.052621	SPIKE	29	26.58	12.08	22	10	4.83	0.5		1.13e-05	5.71e-05	0.03415	0.172132
869	Gm32815		0.396863	0.01044	0.052621	SPIKE	35	32.08	14.58	22	10	5.83	0.5		1.13e-05	5.71e-05	0.03415	0.172132
702	Myh14		0.396013	0.01084	0.054363	ACOS	20	11.67	18.33	14	22	20	0.67		1.18e-05	5.92e-05	0.035556	0.178315
110	Ceacam1		0.395737	0.0111	0.055388	SPIKE	18	6	16.12	8	21.5	4.5	0.25		1.2e-05	5.97e-05	0.036025	0.179764
339	Hps5		0.395039	0.01134	0.056026	SPIKE	23	3.83	15.33	4	16	3.83	0.5		1.24e-05	6.14e-05	0.037236	0.184885
724	Dock8		0.394779	0.01134	0.056026	ACOS	29	9.67	26.58	8	22	29	0.42		1.25e-05	6.18e-05	0.037697	0.186247
946	Actn2		0.394296	0.0114	0.056045	SPIKE	24	2	12.5	2	12.5	6	0.75		1.28e-05	6.29e-05	0.038567	0.189606
998	Sst		0.394188	0.0115	0.056259	SPIKE	34	14.17	29.04	10	20.5	8.5	0.75		1.29e-05	6.29e-05	0.038765	0.189644
183	Pola2		0.391719	0.01255	0.058527	SPIKE	24	6	16.5	6	16.5	6	0.75		1.45e-05	6.8e-05	0.043544	0.204986
209	Gm28729		0.391412	0.01255	0.058527	SPIKE	32	24	10	18	7.5	8	0.25		1.47e-05	6.84e-05	0.044177	0.206024
221	Slco1a4		0.39307	0.01211	0.058527	ACOS	20	5	16.67	6	20	20	0.42		1.36e-05	6.59e-05	0.040865	0.198546
253	Plce1		0.391819	0.01254	0.058527	SPIKE	20	15	3.75	18	4.5	5	0.75		1.44e-05	6.8e-05	0.043341	0.204986
521	Gm29514		0.391412	0.01255	0.058527	SPIKE	29	4.83	21.15	4	17.5	7.25	0.25		1.47e-05	6.84e-05	0.044177	0.206024
579	Morc4		0.391736	0.01254	0.058527	SPIKE	29	0	16.31	0	13.5	7.25	0.25		1.44e-05	6.8e-05	0.043511	0.204986
615	Dusp12		0.392677	0.01216	0.058527	NSPIKE	29	4.83	19.33	4	16	19.33	0.5		1.38e-05	6.66e-05	0.041628	0.200698
662	Cox4i2		0.393009	0.01211	0.058527	SPIKE	32	8	24	6	18	10.67	0.5		1.36e-05	6.59e-05	0.040982	0.198546
898	Itm2c		0.391724	0.01255	0.058527	ACOS	32	29.33	5.33	22	4	32	0.75		1.44e-05	6.8e-05	0.043534	0.204986
929	4930503L19Rik		0.392	0.01254	0.058527	SPIKE	24	10	22	10	22	8	0.5		1.43e-05	6.8e-05	0.042973	0.204986
50	Fbf1		0.391094	0.01278	0.059322	NSPIKE	21	16.19	7	18.5	8	15.75	0.25		1.49e-05	6.91e-05	0.04484	0.208143
176	Fut2		0.390563	0.01293	0.059741	SPIKE	34	28.33	11.33	20	8	5.67	0.5		1.53e-05	7.05e-05	0.045971	0.212402
309	Tmigd1		0.390159	0.01318	0.060615	SPIKE	20	13.33	3.33	16	4	6.67	0.5		1.55e-05	7.15e-05	0.046849	0.215461
761	P3h1		0.38979	0.01342	0.061436	SPIKE	35	32.08	14.58	22	10	5.83	0.5		1.58e-05	7.24e-05	0.047665	0.218212
463	Lrrc2		0.389249	0.01355	0.061748	SPIKE	20	5	16.25	6	19.5	5	0.25		1.62e-05	7.39e-05	0.048884	0.222768
295	C130074G19Rik		0.388511	0.01412	0.062629	SPIKE	19	7.92	16.23	10	20.5	4.75	0.75		1.68e-05	7.45e-05	0.050598	0.224429
323	Pank1		0.388682	0.01399	0.062629	SPIKE	26	0	14.62	0	13.5	6.5	0.25		1.67e-05	7.45e-05	0.050196	0.224429
775	Gvin3		0.388514	0.01412	0.062629	SPIKE	18	4.5	13.5	6	18	3	0.5		1.68e-05	7.45e-05	0.05059	0.224429
802	Tmem40		0.388514	0.01412	0.062629	SPIKE	32	24	8	18	6	8	0.5		1.68e-05	7.45e-05	0.05059	0.224429
951	Myo15		0.388514	0.01412	0.062629	SPIKE	32	8	24	6	18	8	0.5		1.68e-05	7.45e-05	0.05059	0.224429
993	Slc12a1		0.388514	0.01412	0.062629	SPIKE	18	4.5	13.5	6	18	3	0.5		1.68e-05	7.45e-05	0.05059	0.224429
171	Lgi2		0.388231	0.0144	0.063589	SPIKE	35	2.92	20.42	2	14	11.67	0.5		1.7e-05	7.51e-05	0.051263	0.226373
12	Ccdc163		0.387524	0.01464	0.064081	SPIKE	18	6	15	8	20	6	0.5		1.76e-05	7.7e-05	0.052978	0.231965
57	Nlgn4l		0.387517	0.01464	0.064081	SPIKE	20	13.33	3.33	16	4	6.67	0.5		1.76e-05	7.7e-05	0.052994	0.231965
675	Bves		0.38651	0.01502	0.065458	SPIKE	34	28.33	11.33	20	8	5.67	0.5		1.84e-05	8.03e-05	0.055532	0.242011
805	Pofut1		0.386315	0.01532	0.066475	SPIKE	28	0	14	0	12	9.33	0.5		1.86e-05	8.07e-05	0.056038	0.243156
561	Mipep		0.385568	0.01585	0.067889	SPIKE	32	8	24	6	18	10.67	0.5		1.93e-05	8.25e-05	0.05801	0.248472
589	Gm17980		0.386187	0.0158	0.067889	SPIKE	24	12	0	12	0	8	0.5		1.87e-05	8.08e-05	0.05637	0.243536
916	Adap2		0.386006	0.0158	0.067889	SPIKE	22	5.5	15.12	6	16.5	5.5	0.75		1.89e-05	8.12e-05	0.056846	0.244537
320	Acer2		0.384711	0.01601	0.068281	SPIKE	26	2.17	16.79	2	15.5	6.5	0.25		2e-05	8.54e-05	0.060358	0.257422
328	Gm52456		0.384264	0.01654	0.069649	SPIKE	30	20	5	16	4	7.5	0.5		2.04e-05	8.61e-05	0.061615	0.259461
517	Pvalb		0.384413	0.01652	0.069649	SPIKE	35	0	15.31	0	10.5	8.75	0.75		2.03e-05	8.61e-05	0.061192	0.259461
818	Sdcbp2		0.384299	0.01652	0.069649	SPIKE	34	5.67	20.54	4	14.5	8.5	0.75		2.04e-05	8.61e-05	0.061515	0.259461
617	Tmem125		0.384027	0.01672	0.070111	NSPIKE	28	0	14	0	12	18.67	0.5		2.07e-05	8.67e-05	0.062294	0.261214
268	Nenf		0.383308	0.01693	0.0704	ACOS	35	0	0	0	0	35	0		2.14e-05	8.89e-05	0.064391	0.267758
885	Fam162b		0.383707	0.01689	0.0704	SPIKE	23	3.83	15.33	4	16	3.83	0.5		2.1e-05	8.76e-05	0.06322	0.263989
670	Lgals1		0.382784	0.01709	0.07077	SPIKE	33	11	27.5	8	20	11	0.5		2.19e-05	9.07e-05	0.065962	0.273154
585	Esm1		0.382357	0.01745	0.071963	SPIKE	31	5.17	20.67	4	16	10.33	0.5		2.23e-05	9.21e-05	0.067271	0.277424
853	Gm5640		0.381985	0.01798	0.073843	SPIKE	18	0	9	0	12	3	0.5		2.27e-05	9.33e-05	0.068431	0.281046
127	Itgb6		0.381802	0.01807	0.073909	SPIKE	20	13.33	2.08	16	2.5	5	0.75		2.29e-05	9.37e-05	0.069008	0.282253
54	Gm7560		0.381487	0.01832	0.074444	SPIKE	22	0	12.38	0	13.5	5.5	0.25		2.32e-05	9.47e-05	0.07001	0.285184
355	Vash2		0.381187	0.01835	0.074444	SPIKE	18	10.5	1.5	14	2	4.5	0.5		2.36e-05	9.56e-05	0.07098	0.287958
562	Glt8d2		0.379518	0.0197	0.078957	SPIKE	32	24	8	18	6	10.67	0.5		2.54e-05	0.000102	0.076609	0.307053
637	Fcna		0.379532	0.01969	0.078957	SPIKE	30	22.5	7.5	18	6	5	0.5		2.54e-05	0.000102	0.076561	0.307053
933	Drd2		0.379525	0.01969	0.078957	SPIKE	30	22.5	9.38	18	7.5	7.5	0.25		2.54e-05	0.000102	0.076586	0.307053
565	Col6a3		0.377756	0.0207	0.081978	SPIKE	20	10	0	12	0	6.67	0.5		2.76e-05	0.000109	0.08301	0.328746
688	LOC630077		0.378178	0.02063	0.081978	SPIKE	33	8.25	24.75	6	18	11	0.5		2.7e-05	0.000108	0.081433	0.325081
971	Gch1		0.377995	0.02066	0.081978	SPIKE	26	23.83	10.83	22	10	6.5	0.5		2.73e-05	0.000108	0.082115	0.326497
18	Stard9		0.377052	0.02113	0.082053	SPIKE	30	20	3.12	16	2.5	7.5	0.75		2.84e-05	0.00011	0.085706	0.332821
30	Wdr93		0.377052	0.02113	0.082053	SPIKE	30	5	21.88	4	17.5	7.5	0.25		2.84e-05	0.00011	0.085706	0.332821
201	Thpo		0.377565	0.02101	0.082053	SPIKE	18	4.5	13.5	6	18	6	0.5		2.78e-05	0.000109	0.083735	0.329004
331	Edar		0.377052	0.02113	0.082053	SPIKE	35	0	15.31	0	10.5	8.75	0.75		2.84e-05	0.00011	0.085706	0.332821
420	Zgrf1		0.377565	0.02101	0.082053	SPIKE	27	15.75	2.25	14	2	9	0.5		2.78e-05	0.000109	0.083735	0.329004
613	Susd1		0.376884	0.0213	0.082392	SPIKE	28	7	19.25	6	16.5	7	0.75		2.87e-05	0.000111	0.086363	0.334073
155	Aspa		0.376757	0.02176	0.083468	NSPIKE	27	4.5	18	4	16	18	0.5		2.88e-05	0.000111	0.086861	0.334699
252	Slc7a6		0.376644	0.02179	0.083468	ACOS	33	5.5	5.5	4	4	33	0		2.9e-05	0.000111	0.087308	0.335129
330	Kif17		0.376142	0.02194	0.083468	NSPIKE	34	28.33	11.33	20	8	25.5	0.5		2.96e-05	0.000113	0.089317	0.341188
356	Krt6a		0.375773	0.02208	0.083468	SPIKE	35	2.92	20.42	2	14	8.75	0.5		3.01e-05	0.000114	0.090821	0.343527
512	Gm46967		0.37576	0.02208	0.083468	ACOS	18	13.5	9	18	12	18	0.25		3.02e-05	0.000114	0.090873	0.343527
994	Calhm2		0.376079	0.02194	0.083468	SPIKE	35	5.83	21.15	4	14.5	8.75	0.75		2.97e-05	0.000113	0.089571	0.341188
199	Adam28		0.374783	0.02294	0.086067	SPIKE	29	4.83	21.15	4	17.5	7.25	0.25		3.15e-05	0.000118	0.094976	0.356337
334	Kifc1		0.374783	0.02294	0.086067	SPIKE	18	1.5	11.62	2	15.5	4.5	0.25		3.15e-05	0.000118	0.094976	0.356337
762	Ephx4		0.374073	0.02347	0.087726	SPIKE	18	4.5	13.5	6	18	3	0.5		3.25e-05	0.000122	0.098062	0.366539
392	Col24a1		0.373608	0.02369	0.08789	SPIKE	30	15	28.12	12	22.5	7.5	0.75		3.32e-05	0.000124	0.100138	0.372593
934	Rspo1		0.373544	0.02369	0.08789	SPIKE	30	15	28.12	12	22.5	7.5	0.75		3.33e-05	0.000124	0.100428	0.372593
175	Cyp4f40		0.371615	0.02528	0.092415	SPIKE	18	10.5	0.38	14	0.5	4.5	0.75		3.63e-05	0.000133	0.109509	0.400984
445	Wtip		0.371579	0.02528	0.092415	SPIKE	23	1.92	13.42	2	14	5.75	0.5		3.64e-05	0.000133	0.109688	0.400984
558	Fam217a		0.371665	0.02528	0.092415	SPIKE	20	18.33	7.08	22	8.5	5	0.75		3.63e-05	0.000133	0.109264	0.400984
795	Zkscan7		0.371884	0.02517	0.092415	SPIKE	24	12	0	12	0	8	0.5		3.59e-05	0.000133	0.108197	0.399928
549	Isl2		0.371136	0.02548	0.092806	ACOS	28	11.67	7	10	6	28	0.17		3.71e-05	0.000135	0.11188	0.407004
808	Gm15877		0.370913	0.02586	0.093507	SPIKE	24	12	0	12	0	8	0.5		3.75e-05	0.000136	0.113004	0.408615
814	Las1l		0.371083	0.02586	0.093507	NSPIKE	20	0.42	11.67	0.5	14	15	0.25		3.72e-05	0.000135	0.11215	0.407004
353	LOC118567787		0.370828	0.0264	0.095115	SPIKE	19	15.83	7.52	20	9.5	4.75	0.25		3.76e-05	0.000136	0.113431	0.408681
234	Zfp488		0.370243	0.02697	0.096235	SPIKE	34	28.33	11.33	20	8	8.5	0.5		3.86e-05	0.000138	0.116436	0.416923
381	1110018N20Rik		0.37014	0.027	0.096235	SPIKE	24	12	0	12	0	8	0.5		3.88e-05	0.000138	0.116972	0.416923
513	Fst		0.370218	0.027	0.096235	SPIKE	24	10	23.5	10	23.5	6	0.25		3.87e-05	0.000138	0.116566	0.416923
144	4930503B20Rik		0.369775	0.02722	0.096331	SPIKE	29	12.08	26.58	10	22	9.67	0.5		3.95e-05	0.00014	0.118892	0.420761
488	Gm5936		0.369821	0.02716	0.096331	SPIKE	35	2.92	18.23	2	12.5	8.75	0.75		3.94e-05	0.00014	0.118651	0.420761
602	Nrde2		0.369205	0.02755	0.097154	NSPIKE	30	17.5	2.5	14	2	22.5	0.5		4.05e-05	0.000143	0.121952	0.430064
148	Spata17		0.368856	0.02792	0.097261	SPIKE	35	32.08	16.77	22	11.5	8.75	0.25		4.11e-05	0.000144	0.123862	0.433552
195	Pth1r		0.368812	0.02792	0.097261	SPIKE	19	1.58	12.27	2	15.5	4.75	0.25		4.12e-05	0.000144	0.124103	0.433552
292	Prdm8		0.368652	0.02797	0.097261	SPIKE	30	2.5	17.5	2	14	7.5	0.5		4.15e-05	0.000144	0.124986	0.434562
786	Kncn		0.368786	0.02792	0.097261	SPIKE	23	5.75	15.81	6	16.5	5.75	0.75		4.12e-05	0.000144	0.124244	0.433552
534	Ptov1		0.368577	0.02835	0.09824	NSPIKE	32	20.67	2.67	15.5	2	24	0.75		4.16e-05	0.000144	0.125405	0.434562
138	A2ml1		0.368481	0.02855	0.09859	SPIKE	20	5	13.75	6	16.5	5	0.75		4.18e-05	0.000144	0.125942	0.434915
622	Gm26782		0.36839	0.02882	0.09918	SPIKE	31	0	13.56	0	10.5	7.75	0.75		4.2e-05	0.000144	0.126449	0.43516
858	Ranbp17		0.367385	0.0293	0.100485	NSPIKE	20	7.92	16.67	9.5	20	15	0.75		4.39e-05	0.00015	0.132217	0.453446
752	Mocs3		0.367135	0.03011	0.102909	ACOS	32	10.67	8	8	6	32	0.08		4.44e-05	0.000152	0.133691	0.456932
226	Cpsf4l		0.365148	0.03163	0.103158	SPIKE	20	5	13.75	6	16.5	5	0.75		4.84e-05	0.000158	0.145957	0.47603
301	Tonsl		0.365899	0.03104	0.103158	SPIKE	18	10.5	1.5	14	2	4.5	0.5		4.69e-05	0.000158	0.1412	0.47603
333	Mgam		0.365148	0.03163	0.103158	SPIKE	28	0	14	0	12	7	0.5		4.84e-05	0.000158	0.145957	0.47603
357	Ccdc169		0.365148	0.03163	0.103158	SPIKE	28	14	0	12	0	9.33	0.5		4.84e-05	0.000158	0.145957	0.47603
377	Jaml		0.365148	0.03163	0.103158	SPIKE	28	0	14	0	12	7	0.5		4.84e-05	0.000158	0.145957	0.47603
380	Tfap2a		0.365148	0.03163	0.103158	SPIKE	20	6.67	15.42	8	18.5	5	0.75		4.84e-05	0.000158	0.145957	0.47603
424	Xlr4a		0.365213	0.03163	0.103158	NSPIKE	21	20.56	8.75	23.5	10	15.75	0.75		4.83e-05	0.000158	0.145539	0.47603
614	1700017N19Rik		0.365148	0.03163	0.103158	SPIKE	20	6.67	15.42	8	18.5	5	0.75		4.84e-05	0.000158	0.145957	0.47603
701	Nuggc		0.365148	0.03163	0.103158	SPIKE	28	21	8.75	18	7.5	7	0.25		4.84e-05	0.000158	0.145957	0.47603
763	Gm32186		0.366107	0.03103	0.103158	SPIKE	32	5.33	19.33	4	14.5	8	0.75		4.64e-05	0.000158	0.139909	0.474928
849	Dhx35		0.366195	0.03103	0.103158	SPIKE	20	1.67	12.92	2	15.5	5	0.25		4.63e-05	0.000158	0.139371	0.474716
888	Xlr4c		0.366014	0.03104	0.103158	SPIKE	25	0	10.94	0	10.5	6.25	0.75		4.66e-05	0.000158	0.140486	0.47527
955	LOC115489710		0.365148	0.03163	0.103158	SPIKE	20	5	13.75	6	16.5	5	0.75		4.84e-05	0.000158	0.145957	0.47603
979	Gm2007		0.365148	0.03163	0.103158	SPIKE	27	18	4.5	16	4	9	0.5		4.84e-05	0.000158	0.145957	0.47603
47	Mro		0.364891	0.03199	0.103655	SPIKE	27	0	11.81	0	10.5	6.75	0.75		4.9e-05	0.000159	0.147625	0.479561
526	Acad12		0.364833	0.03199	0.103655	SPIKE	28	0	14	0	12	7	0.5		4.91e-05	0.000159	0.148001	0.479561
241	Cfap99		0.364218	0.03267	0.105175	SPIKE	24	12	0	12	0	8	0.5		5.05e-05	0.000162	0.152061	0.489564
312	Egr2		0.364217	0.03267	0.105175	SPIKE	24	12	0	12	0	8	0.5		5.05e-05	0.000162	0.152069	0.489564
367	Prdm13		0.36279	0.03392	0.107126	SPIKE	18	12	4.12	16	5.5	4.5	0.25		5.37e-05	0.00017	0.1619	0.510949
639	Nfe2		0.363109	0.03374	0.107126	SPIKE	20	11.67	1.67	14	2	6.67	0.5		5.3e-05	0.000169	0.159649	0.510673
706	Gm34878		0.36279	0.03392	0.107126	SPIKE	18	1.5	11.62	2	15.5	4.5	0.25		5.37e-05	0.00017	0.1619	0.510949
713	Barhl1		0.363109	0.03374	0.107126	SPIKE	20	5	13.75	6	16.5	5	0.75		5.3e-05	0.000169	0.159649	0.510673
770	Cckar		0.36279	0.03392	0.107126	SPIKE	30	20	3.12	16	2.5	7.5	0.75		5.37e-05	0.00017	0.1619	0.510949
776	Ces1e		0.362761	0.03392	0.107126	SPIKE	18	0	9	0	12	3	0.5		5.38e-05	0.00017	0.162103	0.510949
246	Usp25		0.362734	0.03412	0.107418	NSPIKE	20	11.25	0	13.5	0	15	0.75		5.39e-05	0.00017	0.162296	0.510949
720	Angpt2		0.36199	0.03462	0.108309	SPIKE	28	0	14	0	12	7	0.5		5.56e-05	0.000174	0.167669	0.525463
975	Shpk		0.36195	0.03462	0.108309	SPIKE	32	0	16	0	12	5.33	0.5		5.57e-05	0.000174	0.167959	0.525463
266	Mettl25		0.360875	0.03677	0.111878	NSPIKE	18	8.62	16.5	11.5	22	13.5	0.75		5.84e-05	0.000178	0.176034	0.535615
416	Kcnk4		0.361304	0.0364	0.111878	NSPIKE	33	19.25	2.75	14	2	22	0.5		5.73e-05	0.000177	0.172769	0.53256
583	Iglon5		0.361372	0.0364	0.111878	SPIKE	35	29.17	11.67	20	8	11.67	0.5		5.72e-05	0.000177	0.172254	0.53256
629	Rspo3		0.360877	0.03677	0.111878	NSPIKE	33	24.06	5.5	17.5	4	24.75	0.75		5.84e-05	0.000178	0.176016	0.535615
714	Insm2		0.361359	0.0364	0.111878	ACOS	35	14.58	5.83	10	4	35	0.25		5.72e-05	0.000177	0.172355	0.53256
831	Gm39323		0.360901	0.03677	0.111878	SPIKE	24	10	22	10	22	8	0.5		5.84e-05	0.000178	0.175832	0.535615
880	Hbb-bh1		0.361463	0.03597	0.111878	SPIKE	19	17.42	7.92	22	10	6.33	0.5		5.69e-05	0.000177	0.171574	0.53256
928	Mboat4		0.361287	0.0364	0.111878	SPIKE	32	16	0	12	0	8	0.5		5.74e-05	0.000177	0.172895	0.53256
978	Gm34857		0.36094	0.03677	0.111878	SPIKE	18	4.5	12.38	6	16.5	4.5	0.75		5.83e-05	0.000178	0.175539	0.535615
734	Dph7		0.360077	0.03731	0.113176	ACOS	28	4.67	25.67	4	22	28	0.25		6.05e-05	0.000184	0.182264	0.552887
387	Cdkal1		0.359686	0.03749	0.113378	ACOS	18	0	0	0	0	18	0		6.15e-05	0.000186	0.185391	0.560667
97	Filip1l		0.359025	0.03894	0.116214	SPIKE	32	16	0	12	0	10.67	0.5		6.33e-05	0.000191	0.190796	0.575269
275	Myh8		0.358838	0.03901	0.116214	SPIKE	28	7	22.75	6	19.5	7	0.25		6.38e-05	0.000192	0.192344	0.57819
382	Gm5820		0.358633	0.03901	0.116214	SPIKE	18	12	1.88	16	2.5	4.5	0.75		6.44e-05	0.000192	0.194069	0.578576
568	Cgnl1		0.358616	0.03901	0.116214	NSPIKE	32	20.67	2.67	15.5	2	24	0.75		6.45e-05	0.000192	0.194211	0.578576
605	Hapln3		0.35869	0.03901	0.116214	SPIKE	34	25.5	10.62	18	7.5	8.5	0.25		6.43e-05	0.000192	0.193589	0.578576
87	Pkn3		0.358296	0.03938	0.11662	SPIKE	32	8	24	6	18	8	0.5		6.54e-05	0.000194	0.196924	0.583052
953	Gm7099		0.358367	0.03931	0.11662	SPIKE	33	0	16.5	0	12	8.25	0.5		6.52e-05	0.000194	0.196316	0.583052
35	Zfp809		0.358164	0.03975	0.117021	SPIKE	34	28.33	11.33	20	8	5.67	0.5		6.57e-05	0.000194	0.198051	0.583052
684	Nrf1		0.358185	0.03975	0.117021	SPIKE	32	0	14	0	10.5	8	0.75		6.57e-05	0.000194	0.19787	0.583052
13	Gcgr		0.35656	0.0422	0.117042	SPIKE	32	8	22	6	16.5	8	0.75		7.05e-05	0.000197	0.212269	0.593401
230	Otogl		0.356966	0.04166	0.117042	SPIKE	26	4.33	17.33	4	16	4.33	0.5		6.92e-05	0.000196	0.20858	0.59078
311	Exo1		0.35636	0.0422	0.117042	SPIKE	19	3.17	11.48	4	14.5	4.75	0.75		7.11e-05	0.000198	0.214114	0.595463
325	Prph		0.35635	0.0422	0.117042	SPIKE	18	4.5	13.5	6	18	6	0.5		7.11e-05	0.000198	0.2142	0.595463
373	Cav3		0.357358	0.04087	0.117042	ACOS	35	2.92	32.08	2	22	35	0.17		6.81e-05	0.000196	0.205077	0.59078
395	Tlr5		0.356793	0.04186	0.117042	SPIKE	24	12	1.5	12	1.5	6	0.25		6.97e-05	0.000196	0.210147	0.59078
437	Pdzd7		0.356966	0.04166	0.117042	SPIKE	18	13.5	5.62	18	7.5	4.5	0.25		6.92e-05	0.000196	0.20858	0.59078
442	Prrxl1		0.356966	0.04166	0.117042	SPIKE	34	28.33	11.33	20	8	8.5	0.5		6.92e-05	0.000196	0.20858	0.59078
523	Stab2		0.356966	0.04166	0.117042	SPIKE	18	4.5	12.38	6	16.5	4.5	0.75		6.92e-05	0.000196	0.20858	0.59078
524	Kcnq1		0.356793	0.04186	0.117042	SPIKE	18	16.5	6.38	22	8.5	4.5	0.75		6.97e-05	0.000196	0.210147	0.59078
606	Artn		0.356902	0.04166	0.117042	SPIKE	32	0	16	0	12	5.33	0.5		6.94e-05	0.000196	0.209162	0.59078
797	Cmya5		0.356793	0.04186	0.117042	SPIKE	32	8	22	6	16.5	8	0.75		6.97e-05	0.000196	0.210147	0.59078
811	Vash1		0.35656	0.0422	0.117042	NSPIKE	35	21.15	5.83	14.5	4	26.25	0.25		7.05e-05	0.000197	0.212269	0.593401
854	Pitx1		0.356793	0.04186	0.117042	SPIKE	23	5.75	15.81	6	16.5	5.75	0.75		6.97e-05	0.000196	0.210147	0.59078
855	Vmn2r88		0.356966	0.04166	0.117042	SPIKE	34	28.33	9.21	20	6.5	8.5	0.75		6.92e-05	0.000196	0.20858	0.59078
872	Calca		0.3576	0.0408	0.117042	SPIKE	18	13.5	4.5	18	6	3	0.5		6.74e-05	0.000196	0.202948	0.59078
879	Gm38396		0.356793	0.04186	0.117042	SPIKE	18	7.5	15.38	10	20.5	4.5	0.75		6.97e-05	0.000196	0.210147	0.59078
882	Gm35468		0.356966	0.04166	0.117042	SPIKE	32	8	22	6	16.5	8	0.75		6.92e-05	0.000196	0.20858	0.59078
913	Kcns1		0.355995	0.04222	0.117042	SPIKE	35	26.25	10.94	18	7.5	8.75	0.25		7.22e-05	0.0002	0.217504	0.601609
954	Grhl2		0.356966	0.04166	0.117042	SPIKE	18	4.5	12.38	6	16.5	4.5	0.75		6.92e-05	0.000196	0.20858	0.59078
984	Gm34169		0.35761	0.0408	0.117042	NSPIKE	27	6.75	20.25	6	18	18	0.5		6.73e-05	0.000196	0.20286	0.59078
385	Haus8		0.355983	0.04237	0.117133	ACOS	18	3	0	4	0	18	0.17		7.22e-05	0.0002	0.217616	0.601609
737	Gm2736		0.354435	0.04527	0.124543	SPIKE	32	8	24	6	18	8	0.5		7.72e-05	0.000213	0.232601	0.641258
800	Adat3		0.354265	0.0453	0.124543	NSPIKE	20	11.25	0	13.5	0	15	0.75		7.78e-05	0.000214	0.234297	0.644154
893	Zfp618		0.353847	0.04564	0.125133	SPIKE	28	4.67	16.92	4	14.5	7	0.75		7.92e-05	0.000217	0.238537	0.654011
90	Lsmem2		0.353721	0.04628	0.125959	SPIKE	35	8.75	26.25	6	18	11.67	0.5		7.96e-05	0.000218	0.239831	0.655757
169	Sirt4		0.353305	0.04632	0.125959	SPIKE	18	4.5	13.5	6	18	6	0.5		8.1e-05	0.000221	0.244138	0.665324
541	Chuk		0.353255	0.04632	0.125959	SPIKE	18	0	7.88	0	10.5	4.5	0.75		8.12e-05	0.000221	0.244663	0.665324
26	Sh3tc1		0.353116	0.04666	0.125963	ACOS	35	8.75	17.5	6	12	35	0.75		8.17e-05	0.000222	0.246125	0.667481
78	1700019D03Rik		0.352813	0.0467	0.125963	SPIKE	24	12	0	12	0	8	0.5		8.28e-05	0.000223	0.249329	0.672513
719	Zfp819		0.353024	0.04666	0.125963	NSPIKE	24	22	10	22	10	16	0.5		8.2e-05	0.000222	0.247091	0.668285
73	Ano1		0.352106	0.04814	0.128115	SPIKE	20	13.33	2.08	16	2.5	5	0.75		8.53e-05	0.000227	0.256973	0.68389
173	Etv4		0.352462	0.04811	0.128115	SPIKE	35	0	19.69	0	13.5	8.75	0.25		8.4e-05	0.000225	0.253098	0.677191
438	Zfp697		0.352373	0.04811	0.128115	SPIKE	32	8	24	6	18	8	0.5		8.43e-05	0.000225	0.254057	0.677939
448	Tgfbr3l		0.352462	0.04811	0.128115	SPIKE	35	0	15.31	0	10.5	8.75	0.75		8.4e-05	0.000225	0.253098	0.677191
556	St3gal1		0.352462	0.04811	0.128115	SPIKE	30	0	13.12	0	10.5	7.5	0.75		8.4e-05	0.000225	0.253098	0.677191
694	Gm11218		0.351912	0.04869	0.129234	NSPIKE	30	15.62	2.5	12.5	2	22.5	0.25		8.6e-05	0.000228	0.259114	0.687754
39	Nt5c1b		0.35148	0.04944	0.129503	SPIKE	18	12	4.12	16	5.5	4.5	0.25		8.76e-05	0.000231	0.263927	0.696822
63	Adgrg2		0.35125	0.04944	0.129503	NSPIKE	27	4.5	18	4	16	18	0.5		8.85e-05	0.000232	0.26652	0.699967
180	Rassf6		0.351051	0.04944	0.129503	SPIKE	30	22.5	9.38	18	7.5	7.5	0.25		8.92e-05	0.000234	0.268789	0.704072
274	Slc16a3		0.351497	0.04944	0.129503	NSPIKE	31	21.31	7.75	16.5	6	23.25	0.25		8.75e-05	0.000231	0.26373	0.696822
671	Xylb		0.351352	0.04944	0.129503	SPIKE	28	0	14	0	12	9.33	0.5		8.81e-05	0.000232	0.26537	0.698784
906	Slfn5		0.350989	0.04976	0.13	SPIKE	30	20	5	16	4	10	0.5		8.94e-05	0.000234	0.269501	0.704089
757	Mrgprf		0.350797	0.050169	0.130388	SPIKE	30	17.5	0.62	14	0.5	7.5	0.75		9.02e-05	0.000234	0.271713	0.706171
764	Cdh23		0.350797	0.050169	0.130388	SPIKE	18	13.5	5.62	18	7.5	4.5	0.25		9.02e-05	0.000234	0.271713	0.706171
394	Kcnj8		0.350473	0.050639	0.130928	SPIKE	24	22	8.5	22	8.5	6	0.75		9.14e-05	0.000236	0.275475	0.712239
657	Ltbr		0.350609	0.050579	0.130928	SPIKE	24	4	16	4	16	6	0.5		9.09e-05	0.000236	0.273886	0.709969
188	Ahnak2		0.350325	0.051559	0.132619	SPIKE	18	6	15	8	20	6	0.5		9.2e-05	0.000237	0.277219	0.714896
685	Gm34759		0.35007	0.051559	0.132619	SPIKE	20	10	0	12	0	6.67	0.5		9.3e-05	0.000239	0.280231	0.7208
198	Ccdc188		0.349323	0.052549	0.133446	SPIKE	28	14	0	12	0	9.33	0.5		9.6e-05	0.000244	0.289248	0.736401
364	Fam117a		0.349364	0.052549	0.133446	ACOS	29	2.42	14.5	2	12	29	0.58		9.58e-05	0.000244	0.288746	0.736401
573	Twsg1		0.349182	0.052549	0.133446	SPIKE	18	16.5	7.5	22	10	6	0.5		9.66e-05	0.000245	0.290981	0.738928
601	Radil		0.34937	0.052549	0.133446	NSPIKE	28	0	14	0	12	18.67	0.5		9.58e-05	0.000244	0.288671	0.736401
691	Trim68		0.349453	0.052549	0.133446	NSPIKE	24	22	10	22	10	16	0.5		9.55e-05	0.000244	0.287663	0.736401
264	Sytl5		0.348774	0.053329	0.135083	SPIKE	26	4.33	17.33	4	16	4.33	0.5		9.83e-05	0.000249	0.296046	0.749882
244	Fmo2		0.348608	0.053689	0.135651	NSPIKE	32	29.33	13.33	22	10	26.67	0.5		9.89e-05	0.00025	0.298133	0.753258
594	Efcc1		0.348458	0.054239	0.136694	SPIKE	26	2.17	13.54	2	12.5	6.5	0.75		9.96e-05	0.000251	0.300032	0.75614
28	Zic4		0.348045	0.055479	0.139117	SPIKE	32	5.33	21.33	4	16	5.33	0.5		0.000101	0.000254	0.305309	0.765574
570	Bbc3		0.348045	0.055479	0.139117	SPIKE	32	5.33	21.33	4	16	5.33	0.5		0.000101	0.000254	0.305309	0.765574
94	B3galt5		0.346964	0.056649	0.141695	ACOS	32	24	26.67	18	20	32	0.92		0.000106	0.000265	0.319557	0.799293
530	Dnah11		0.346372	0.057409	0.142879	NSPIKE	33	11	27.5	8	20	22	0.5		0.000109	0.000271	0.32762	0.815375
551	S100a4		0.346451	0.057409	0.142879	SPIKE	20	13.33	4.58	16	5.5	5	0.25		0.000108	0.00027	0.326526	0.814682
930	Cckbr		0.346142	0.057819	0.143542	NSPIKE	18	8.62	16.5	11.5	22	13.5	0.75		0.00011	0.000272	0.330794	0.820416
924	Gm16759		0.346107	0.058419	0.144671	SPIKE	18	4.5	12.38	6	16.5	4.5	0.75		0.00011	0.000272	0.33129	0.820416
410	Ccna1		0.344298	0.060749	0.147513	NSPIKE	34	28.33	11.33	20	8	22.67	0.5		0.000119	0.000288	0.357385	0.86781
500	Cep78		0.344573	0.060719	0.147513	SPIKE	18	4.5	13.5	6	18	6	0.5		0.000117	0.000285	0.353302	0.859989
515	Kcp		0.344865	0.060339	0.147513	SPIKE	20	18.33	7.08	22	8.5	5	0.75		0.000116	0.000283	0.348999	0.853678
716	Ly6i		0.344865	0.060339	0.147513	SPIKE	30	20	5	16	4	7.5	0.5		0.000116	0.000283	0.348999	0.853678
744	Mcoln3		0.345697	0.059919	0.147513	NSPIKE	31	23.9	10.33	18.5	8	23.25	0.25		0.000112	0.000276	0.337042	0.832595
915	Sipa1l3		0.345251	0.060079	0.147513	NSPIKE	24	10	22	10	22	16	0.5		0.000114	0.00028	0.343409	0.844143
959	Slc19a1		0.34549	0.059999	0.147513	NSPIKE	33	24.06	5.5	17.5	4	24.75	0.75		0.000113	0.000278	0.339977	0.83777
965	Cyp27a1		0.344657	0.060719	0.147513	SPIKE	35	17.5	2.19	12	1.5	8.75	0.25		0.000117	0.000285	0.352062	0.859065
540	Atf7ip2		0.343837	0.061679	0.149408	NSPIKE	20	0	10	0	12	13.33	0.5		0.000121	0.000293	0.364335	0.882541
290	Rps6kb2		0.342856	0.063449	0.152584	NSPIKE	31	13.56	0	10.5	0	23.25	0.25		0.000126	0.000303	0.37955	0.912749
397	Inhba		0.343479	0.063329	0.152584	NSPIKE	35	15.31	0	10.5	0	26.25	0.25		0.000123	0.000296	0.36983	0.891522
952	Phtf1os		0.343531	0.063329	0.152584	SPIKE	23	1.92	13.42	2	14	5.75	0.5		0.000122	0.000296	0.369024	0.891522
249	Cgn		0.341851	0.065759	0.157004	ACOS	23	11.5	11.5	12	12	23	0		0.000131	0.000314	0.395768	0.946829
452	Gm9899		0.341802	0.065759	0.157004	SPIKE	32	8	24	6	18	8	0.5		0.000132	0.000314	0.396568	0.946829
735	Shf		0.342007	0.065709	0.157004	SPIKE	24	4	16	4	16	6	0.5		0.000131	0.000313	0.393213	0.943334
844	Cenpl		0.341409	0.066369	0.158083	SPIKE	18	10.5	1.5	14	2	4.5	0.5		0.000134	0.000319	0.403099	0.960126
466	Zfyve1		0.340777	0.067949	0.161077	NSPIKE	35	26.25	8.75	18	6	29.17	0.5		0.000137	0.000326	0.413803	0.981848
742	Nmur2		0.340755	0.067949	0.161077	SPIKE	18	10.5	0.38	14	0.5	4.5	0.75		0.000137	0.000326	0.414186	0.981848
707	F8		0.340503	0.068189	0.161263	SPIKE	19	0	8.31	0	10.5	4.75	0.75		0.000139	0.000329	0.418535	0.989805
129	Kif20b		0.340167	0.068909	0.161717	SPIKE	18	1.5	11.62	2	15.5	4.5	0.25		0.000141	0.000332	0.424394	1
336	Thumpd2		0.339625	0.069029	0.161717	NSPIKE	19	12.27	1.58	15.5	2	14.25	0.75		0.000144	0.000337	0.434007	1
407	Tyk2		0.339739	0.069029	0.161717	ACOS	34	2.83	28.33	2	20	34	0.25		0.000143	0.000337	0.431963	1
840	Adnp2		0.340042	0.068959	0.161717	SPIKE	18	12	3	16	4	4.5	0.5		0.000142	0.000333	0.426596	1
214	Grm4		0.33934	0.069739	0.162997	NSPIKE	18	8.62	16.5	11.5	22	13.5	0.75		0.000146	0.000341	0.43915	1
70	Kcnj12		0.339072	0.070659	0.164762	SPIKE	32	24	6	18	4.5	8	0.75		0.000147	0.000344	0.444034	1
827	Atp10d		0.33851	0.072309	0.168216	SPIKE	24	10	23.5	10	23.5	6	0.25		0.000151	0.000351	0.45444	1
259	Srbd1		0.33701	0.073629	0.169704	NSPIKE	18	1.12	9	1.5	12	13.5	0.75		0.00016	0.00037	0.483346	1
785	Gm13916		0.337171	0.073629	0.169704	NSPIKE	32	19.33	5.33	14.5	4	24	0.25		0.000159	0.000368	0.480168	1
799	Zfp235		0.337171	0.073629	0.169704	SPIKE	24	0	10.5	0	10.5	6	0.75		0.000159	0.000368	0.480168	1
937	Zfp11		0.337665	0.073609	0.169704	SPIKE	32	24	8	18	6	10.67	0.5		0.000156	0.000362	0.470518	1
120	Arap3		0.336941	0.073809	0.169727	SPIKE	26	2.17	16.79	2	15.5	6.5	0.25		0.000161	0.00037	0.484718	1
600	Dipk2b		0.336527	0.076349	0.174763	SPIKE	18	12	1.88	16	2.5	4.5	0.75		0.000164	0.000374	0.493019	1
863	A930038B10Rik		0.336654	0.076219	0.174763	SPIKE	24	22	8.5	22	8.5	6	0.75		0.000163	0.000373	0.490455	1
89	Adamts16		0.336199	0.078149	0.175772	NSPIKE	29	21.75	7.25	18	6	19.33	0.5		0.000166	0.000377	0.499686	1
346	Zfp951		0.336363	0.077879	0.175772	SPIKE	26	4.33	17.33	4	16	4.33	0.5		0.000165	0.000375	0.49634	1
388	Usp40		0.335912	0.078199	0.175772	SPIKE	26	0	14.62	0	13.5	6.5	0.25		0.000168	0.000378	0.50559	1
495	Elf3		0.336068	0.078149	0.175772	SPIKE	33	30.25	13.75	22	10	5.5	0.5		0.000167	0.000377	0.502367	1
666	Gm29797		0.336068	0.078149	0.175772	SPIKE	33	13.75	28.19	10	20.5	8.25	0.75		0.000167	0.000377	0.502367	1
667	Spice1		0.336044	0.078149	0.175772	ACOS	18	16.5	10.5	22	14	18	0.33		0.000167	0.000377	0.502859	1
777	1700019N19Rik		0.335832	0.078199	0.175772	SPIKE	18	0	7.88	0	10.5	4.5	0.75		0.000168	0.000378	0.507252	1
981	Depp1		0.336489	0.077099	0.175772	SPIKE	32	8	24	6	18	8	0.5		0.000164	0.000374	0.493793	1
625	Hs3st3a1		0.334858	0.079039	0.177261	ACOS	18	12	1.5	16	2	18	0.58		0.000175	0.000393	0.527849	1
449	Inpp5d		0.333668	0.082359	0.182249	SPIKE	19	15.83	5.15	20	6.5	4.75	0.75		0.000184	0.000407	0.554053	1
458	Gata3		0.333742	0.082359	0.182249	SPIKE	34	31.17	14.17	22	10	5.67	0.5		0.000183	0.000407	0.552392	1
497	Tmem253		0.333732	0.082359	0.182249	SPIKE	24	6	16.5	6	16.5	6	0.75		0.000183	0.000407	0.552624	1
575	9430038I01Rik		0.334115	0.082289	0.182249	SPIKE	22	3.67	14.67	4	16	5.5	0.5		0.000181	0.000403	0.544071	1
917	Hacd4		0.33416	0.082289	0.182249	NSPIKE	20	0	10	0	12	13.33	0.5		0.00018	0.000403	0.543074	1
919	Zfp862-ps		0.333742	0.082359	0.182249	SPIKE	32	5.33	21.33	4	16	5.33	0.5		0.000183	0.000407	0.552392	1
341	Kiss1		0.333508	0.082579	0.182332	NSPIKE	24	20	8	20	8	20	0.5		0.000185	0.000409	0.557676	1
272	Cyp2r1		0.333333	0.083519	0.183595	SPIKE	24	2	12.5	2	12.5	6	0.75		0.000186	0.00041	0.561654	1
936	Wdr81		0.333344	0.083519	0.183595	NSPIKE	18	16.5	7.5	22	10	13.5	0.5		0.000186	0.00041	0.561407	1
708	Elovl7		0.332729	0.084099	0.184464	SPIKE	32	5.33	19.33	4	14.5	8	0.75		0.000191	0.000419	0.575609	1
591	Otof		0.332564	0.084819	0.18489	SPIKE	24	22	8.5	22	8.5	6	0.75		0.000192	0.000421	0.579464	1
838	Grip2		0.332351	0.084849	0.18489	SPIKE	32	24	8	18	6	8	0.5		0.000194	0.000423	0.584488	1
943	Col8a2		0.332385	0.084849	0.18489	SPIKE	22	3.67	14.67	4	16	5.5	0.5		0.000194	0.000423	0.583694	1
163	Trim6		0.331231	0.087719	0.18746	SPIKE	32	24	10	18	7.5	8	0.25		0.000203	0.000436	0.611593	1
172	Serpina3i		0.3314	0.087649	0.18746	SPIKE	22	0	11	0	12	5.5	0.5		0.000202	0.000435	0.60745	1
340	Scyl3		0.331032	0.087719	0.18746	NSPIKE	18	7.88	0	10.5	0	13.5	0.25		0.000205	0.000437	0.616534	1
690	Synpo2l		0.331106	0.087719	0.18746	SPIKE	32	5.33	21.33	4	16	5.33	0.5		0.000204	0.000437	0.614713	1
715	Haao		0.331231	0.087719	0.18746	SPIKE	30	2.5	17.5	2	14	5	0.5		0.000203	0.000436	0.611593	1
718	Tsen54		0.332039	0.087169	0.18746	SPIKE	20	8.33	17.08	10	20.5	5	0.75		0.000196	0.000426	0.591939	1
755	Zfp324		0.332099	0.086579	0.18746	SPIKE	28	0	14	0	12	7	0.5		0.000196	0.000426	0.590503	1
927	Cntrob		0.331744	0.087639	0.18746	NSPIKE	23	0	11.5	0	12	17.25	0.5		0.000199	0.000429	0.599041	1
956	Slc16a4		0.33197	0.087169	0.18746	SPIKE	18	4.5	12.38	6	16.5	4.5	0.75		0.000197	0.000426	0.593592	1
36	Islr2		0.330912	0.088329	0.187958	SPIKE	31	28.42	12.92	22	10	7.75	0.5		0.000206	0.000438	0.619538	1
563	Slc4a5		0.330895	0.088329	0.187958	SPIKE	24	0	12	0	12	4	0.5		0.000206	0.000438	0.619966	1
980	Hvcn1		0.330474	0.089369	0.189767	ACOS	34	19.83	17	14	12	34	0.08		0.000209	0.000444	0.630594	1
582	Lrat		0.329775	0.092219	0.194989	NSPIKE	19	16.23	7.92	20.5	10	14.25	0.25		0.000215	0.000455	0.648602	1
790	Nnmt		0.329844	0.092149	0.194989	SPIKE	18	0	7.88	0	10.5	4.5	0.75		0.000215	0.000455	0.646806	1
992	Plekho2		0.329257	0.092859	0.195927	SPIKE	34	28.33	11.33	20	8	11.33	0.5		0.00022	0.000464	0.662268	1
358	Rasgrp3		0.328975	0.093469	0.196093	SPIKE	24	22	8.5	22	8.5	6	0.75		0.000222	0.000467	0.669818	1
408	Sec14l3		0.328342	0.094949	0.196093	SPIKE	24	0	13.5	0	13.5	6	0.25		0.000228	0.000473	0.687037	1
595	Trim30c		0.328219	0.095099	0.196093	SPIKE	22	5.5	15.12	6	16.5	5.5	0.75		0.000229	0.000473	0.690428	1
610	Lox		0.328939	0.093849	0.196093	SPIKE	24	6	16.5	6	16.5	6	0.75		0.000223	0.000467	0.670786	1
619	Spata18		0.328571	0.094949	0.196093	SPIKE	20	5	13.75	6	16.5	5	0.75		0.000226	0.000472	0.680746	1
620	Kcne3		0.328219	0.095099	0.196093	SPIKE	20	16.67	7.92	20	9.5	5	0.25		0.000229	0.000473	0.690428	1
647	Trim36		0.328537	0.094949	0.196093	NSPIKE	32	16	0	12	0	26.67	0.5		0.000226	0.000472	0.681689	1
741	Tmc8		0.328219	0.095099	0.196093	SPIKE	32	0	14	0	10.5	8	0.75		0.000229	0.000473	0.690428	1
824	Gm7587		0.329045	0.093469	0.196093	NSPIKE	18	7.5	16.5	10	22	12	0.5		0.000222	0.000467	0.667921	1
876	Smpd4		0.328219	0.095099	0.196093	NSPIKE	29	21.75	7.25	18	6	19.33	0.5		0.000229	0.000473	0.690428	1
973	Lrrc3b		0.328156	0.095099	0.196093	NSPIKE	32	13.33	29.33	10	22	26.67	0.5		0.00023	0.000474	0.69219	1
649	Tmc6		0.32753	0.097119	0.199845	SPIKE	33	0	16.5	0	12	11	0.5		0.000236	0.000485	0.70976	1
902	S100b		0.327117	0.098659	0.202596	NSPIKE	32	29.33	13.33	22	10	26.67	0.5		0.000239	0.000492	0.721573	1
56	Grin2c		0.32569	0.101499	0.204306	SPIKE	18	3	10.88	4	14.5	4.5	0.75		0.000254	0.000512	0.763832	1
133	Pbx4		0.326324	0.101009	0.204306	SPIKE	18	0	7.88	0	10.5	4.5	0.75		0.000247	0.000502	0.744796	1
145	Arhgef15		0.326732	0.100789	0.204306	SPIKE	32	16	0	12	0	10.67	0.5		0.000243	0.000495	0.73276	1
154	Il16		0.326076	0.101119	0.204306	SPIKE	28	7	21	6	18	7	0.5		0.00025	0.000506	0.7522	1
263	Cdc45		0.325555	0.101539	0.204306	SPIKE	30	2.5	17.5	2	14	5	0.5		0.000255	0.000514	0.767969	1
307	Pparg		0.326732	0.100789	0.204306	SPIKE	32	24	8	18	6	10.67	0.5		0.000243	0.000495	0.73276	1
428	Cd209c		0.326732	0.100789	0.204306	SPIKE	18	12	3	16	4	4.5	0.5		0.000243	0.000495	0.73276	1
731	Lrrc14		0.325743	0.101499	0.204306	ACOS	35	26.25	0	18	0	35	0.75		0.000253	0.000512	0.762237	1
825	Pld1		0.325454	0.101539	0.204306	SPIKE	29	7.25	21.75	6	18	9.67	0.5		0.000256	0.000515	0.771068	1
944	Tex14		0.326732	0.100789	0.204306	SPIKE	18	12	3	16	4	4.5	0.5		0.000243	0.000495	0.73276	1
941	Serpina3f		0.32517	0.103119	0.207068	SPIKE	29	0	14.5	0	12	7.25	0.5		0.000259	0.00052	0.779809	1
479	LOC118567558		0.325094	0.103799	0.208015	SPIKE	30	5	21.88	4	17.5	7.5	0.25		0.00026	0.00052	0.782168	1
9	Accs		0.32383	0.106979	0.210364	SPIKE	34	28.33	11.33	20	8	5.67	0.5		0.000273	0.000543	0.822424	1
121	Dnmt3b		0.323221	0.107079	0.210364	SPIKE	30	20	5	16	4	10	0.5		0.00028	0.000549	0.842475	1
378	Ripor3		0.323221	0.107079	0.210364	SPIKE	35	2.92	20.42	2	14	11.67	0.5		0.00028	0.000549	0.842475	1
447	Mgl2		0.323221	0.107079	0.210364	SPIKE	26	23.83	12.46	22	11.5	6.5	0.25		0.00028	0.000549	0.842475	1
511	Rbm41		0.324445	0.105809	0.210364	SPIKE	29	7.25	21.75	6	18	9.67	0.5		0.000266	0.000533	0.802607	1
788	Myrf		0.323331	0.107079	0.210364	ACOS	28	2.33	7	2	6	28	0.83		0.000278	0.000549	0.83881	1
839	Klk1		0.324375	0.105809	0.210364	SPIKE	24	0	10.5	0	10.5	6	0.75		0.000267	0.000533	0.804847	1
856	Clic5		0.323493	0.107009	0.210364	SPIKE	32	24	8	18	6	10.67	0.5		0.000277	0.000549	0.833465	1
939	Lpcat2		0.32389	0.106979	0.210364	SPIKE	28	4.67	16.92	4	14.5	7	0.75		0.000272	0.000542	0.82047	1
964	Tcp10c		0.323221	0.107079	0.210364	SPIKE	26	4.33	17.33	4	16	6.5	0.5		0.00028	0.000549	0.842475	1
106	Psd4		0.322031	0.112009	0.216739	SPIKE	35	0	19.69	0	13.5	8.75	0.25		0.000293	0.000568	0.883029	1
265	Cytip		0.322418	0.111959	0.216739	ACOS	20	5	3.33	6	4	20	0.08		0.000289	0.000564	0.869621	1
267	Tgif2		0.322073	0.112009	0.216739	SPIKE	35	2.92	20.42	2	14	8.75	0.5		0.000293	0.000568	0.881556	1
315	Nos3		0.322416	0.111959	0.216739	SPIKE	18	6	16.12	8	21.5	4.5	0.25		0.000289	0.000564	0.869716	1
453	Gm15521		0.323029	0.111069	0.216739	SPIKE	18	4.5	13.5	6	18	3	0.5		0.000282	0.000552	0.848896	1
588	Pstpip1		0.321665	0.112279	0.216739	SPIKE	25	6.25	17.19	6	16.5	6.25	0.75		0.000297	0.000574	0.895833	1
596	Dnajc25		0.322031	0.112009	0.216739	SPIKE	35	32.08	12.4	22	8.5	8.75	0.75		0.000293	0.000568	0.883029	1
665	Cenpt		0.321665	0.112279	0.216739	SPIKE	26	2.17	16.79	2	15.5	6.5	0.25		0.000297	0.000574	0.895833	1
843	Gm41442		0.322252	0.111959	0.216739	SPIKE	32	8	24	6	18	10.67	0.5		0.000291	0.000566	0.875363	1
554	Slc5a11		0.321081	0.114359	0.219904	NSPIKE	28	19.25	7	16.5	6	21	0.25		0.000304	0.000585	0.916682	1
672	9430053O09Rik		0.321097	0.114359	0.219904	SPIKE	28	0	14	0	12	9.33	0.5		0.000304	0.000585	0.916077	1
711	Zfp384		0.320607	0.117249	0.224634	NSPIKE	21	12.69	3.5	14.5	4	15.75	0.25		0.00031	0.000595	0.933922	1
787	Nkd1		0.320496	0.117269	0.224634	NSPIKE	32	18.67	2.67	14	2	24	0.5		0.000311	0.000596	0.937995	1
362	Trim12a		0.318543	0.121619	0.230314	SPIKE	32	5.33	21.33	4	16	5.33	0.5		0.000336	0.000635	1.01254	1
487	Gls2		0.318664	0.121619	0.230314	SPIKE	24	10	22	10	22	8	0.5		0.000334	0.000635	1.00776	1
510	Zbtb49		0.31915	0.120879	0.230314	SPIKE	32	0	14	0	10.5	8	0.75		0.000328	0.000627	0.988786	1
664	Pth2r		0.319066	0.120879	0.230314	SPIKE	19	0	8.31	0	10.5	4.75	0.75		0.000329	0.000628	0.992056	1
821	Nemp2		0.318822	0.121149	0.230314	SPIKE	33	27.5	11	20	8	11	0.5		0.000332	0.000633	1.00153	1
873	Slc6a3		0.318708	0.121229	0.230314	SPIKE	35	32.08	14.58	22	10	5.83	0.5		0.000334	0.000635	1.00604	1
45	Vwa3a		0.317979	0.123699	0.232488	ACOS	28	25.67	2.33	22	2	28	0.83		0.000344	0.000646	1.03506	1
300	Vav3		0.318508	0.123669	0.232488	SPIKE	18	1.5	11.62	2	15.5	4.5	0.25		0.000337	0.000635	1.01392	1
402	Tspan8		0.318508	0.123669	0.232488	SPIKE	18	0	7.88	0	10.5	4.5	0.75		0.000337	0.000635	1.01392	1
485	Ncf1		0.318382	0.123669	0.232488	SPIKE	22	0	12.38	0	13.5	5.5	0.25		0.000338	0.000637	1.01893	1
190	Adgb		0.317925	0.124629	0.233357	SPIKE	19	6.33	15.83	8	20	3.17	0.5		0.000344	0.000646	1.03722	1
674	Sgcz		0.317781	0.124629	0.233357	SPIKE	32	16	0	12	0	8	0.5		0.000346	0.000647	1.04309	1
297	Wnt6		0.317761	0.126069	0.234425	ACOS	20	5	16.67	6	20	20	0.42		0.000346	0.000647	1.04388	1
584	Nkpd1		0.317397	0.126139	0.234425	SPIKE	19	1.58	12.27	2	15.5	4.75	0.25		0.000351	0.000653	1.05878	1
633	Gm51670		0.317397	0.126139	0.234425	SPIKE	35	17.5	2.19	12	1.5	8.75	0.25		0.000351	0.000653	1.05878	1
810	Wnk4		0.31743	0.126139	0.234425	SPIKE	35	32.08	12.4	22	8.5	8.75	0.75		0.000351	0.000653	1.05743	1
911	Niban3		0.317233	0.127559	0.236624	SPIKE	25	18.75	4.69	18	4.5	6.25	0.75		0.000354	0.000656	1.06557	1
40	Zbtb7b		0.316686	0.128749	0.237142	ACOS	24	14	10	14	10	24	0.17		0.000361	0.000668	1.0885	1
179	Pla1a		0.316902	0.128749	0.237142	SPIKE	35	2.92	20.42	2	14	11.67	0.5		0.000358	0.000663	1.07937	1
236	Kcns3		0.31658	0.128749	0.237142	SPIKE	35	17.5	2.19	12	1.5	8.75	0.25		0.000363	0.000669	1.09296	1
830	Prokr2		0.316284	0.128789	0.237142	SPIKE	18	6	15	8	20	6	0.5		0.000367	0.000676	1.1056	1
480	Tcp11		0.315395	0.132529	0.243132	SPIKE	18	13.5	5.62	18	7.5	4.5	0.25		0.00038	0.000697	1.14438	1
539	Zbbx		0.315429	0.132529	0.243132	SPIKE	26	2.17	16.79	2	15.5	6.5	0.25		0.000379	0.000697	1.14286	1
196	Mpl		0.314934	0.134329	0.244189	SPIKE	33	30.25	13.75	22	10	8.25	0.5		0.000387	0.000703	1.16494	1
204	Adgrf5		0.315135	0.134329	0.244189	SPIKE	33	30.25	13.75	22	10	5.5	0.5		0.000384	0.000699	1.15592	1
207	Ccdc33		0.315272	0.133739	0.244189	SPIKE	32	24	6	18	4.5	8	0.75		0.000382	0.000698	1.14983	1
279	Fam189a2		0.315109	0.134329	0.244189	SPIKE	18	12	4.12	16	5.5	4.5	0.25		0.000384	0.000699	1.15709	1
528	Lhb		0.315239	0.134329	0.244189	SPIKE	28	0	14	0	12	7	0.5		0.000382	0.000698	1.1513	1
270	Itprid1		0.314286	0.135889	0.244796	SPIKE	20	1.67	10.42	2	12.5	5	0.75		0.000396	0.000714	1.1945	1
697	Cdhr3		0.3146	0.135589	0.244796	SPIKE	23	9.58	19.65	10	20.5	5.75	0.75		0.000392	0.000711	1.18011	1
746	Lamc3		0.314286	0.135889	0.244796	SPIKE	20	6.67	15.42	8	18.5	5	0.75		0.000396	0.000714	1.1945	1
850	Malt1		0.314285	0.135889	0.244796	SPIKE	18	13.5	5.62	18	7.5	4.5	0.25		0.000396	0.000714	1.19453	1
968	Rhbdf2		0.314286	0.135889	0.244796	SPIKE	27	18	4.5	16	4	9	0.5		0.000396	0.000714	1.1945	1
867	Tead3		0.313587	0.138639	0.2493	SPIKE	28	4.67	16.92	4	14.5	7	0.75		0.000407	0.000732	1.22714	1
525	Ccdc62		0.313399	0.140199	0.2512	SPIKE	21	5.25	15.75	6	18	5.25	0.5		0.00041	0.000735	1.23602	1
822	Fam89a		0.313399	0.140199	0.2512	SPIKE	25	6.25	17.19	6	16.5	6.25	0.75		0.00041	0.000735	1.23602	1
43	Gm26803		0.312021	0.142589	0.254113	SPIKE	19	15.83	5.15	20	6.5	4.75	0.75		0.000433	0.000771	1.30323	1
792	Nab1		0.312437	0.142579	0.254113	SPIKE	35	2.92	20.42	2	14	11.67	0.5		0.000426	0.00076	1.28263	1
793	Gm40537		0.312601	0.142579	0.254113	SPIKE	18	12	4.12	16	5.5	4.5	0.25		0.000423	0.000757	1.27453	1
926	LOC115486423		0.311574	0.144659	0.257343	SPIKE	33	22	3.44	16	2.5	8.25	0.75		0.00044	0.000783	1.32579	1
650	Ppef2		0.309965	0.150019	0.266403	SPIKE	18	4.5	13.5	6	18	3	0.5		0.000468	0.000831	1.40984	1
396	Pyroxd2		0.309831	0.150488	0.266763	SPIKE	28	0	14	0	12	9.33	0.5		0.00047	0.000834	1.41708	1
345	Arhgap42		0.308662	0.155188	0.272673	SPIKE	26	4.33	17.33	4	16	4.33	0.5		0.000492	0.000865	1.48155	1
501	Xkrx		0.30932	0.155188	0.272673	NSPIKE	35	2.19	17.5	1.5	12	26.25	0.75		0.00048	0.000849	1.44491	1
567	Gm39326		0.30879	0.155188	0.272673	SPIKE	22	5.5	15.12	6	16.5	5.5	0.75		0.000489	0.000863	1.47433	1
829	1110032A03Rik		0.308556	0.155188	0.272673	SPIKE	29	0	16.31	0	13.5	7.25	0.25		0.000494	0.000867	1.48753	1
862	Drp2		0.30915	0.155188	0.272673	SPIKE	19	15.83	7.52	20	9.5	4.75	0.25		0.000483	0.000853	1.45431	1
124	Zfp474		0.308229	0.158348	0.275317	SPIKE	35	0	19.69	0	13.5	8.75	0.25		0.0005	0.000872	1.50608	1
314	Catspere2		0.308062	0.158348	0.275317	SPIKE	27	0	11.81	0	10.5	6.75	0.75		0.000503	0.000876	1.51569	1
564	Sim1		0.308229	0.158348	0.275317	SPIKE	35	8.75	24.06	6	16.5	8.75	0.75		0.0005	0.000872	1.50608	1
609	Gm8843		0.307841	0.158348	0.275317	NSPIKE	18	1.88	12	2.5	16	13.5	0.25		0.000507	0.000882	1.52845	1
693	Fes		0.308229	0.158348	0.275317	SPIKE	35	0	19.69	0	13.5	8.75	0.25		0.0005	0.000872	1.50608	1
868	1700020L24Rik		0.308229	0.158348	0.275317	SPIKE	29	4.83	19.33	4	16	4.83	0.5		0.0005	0.000872	1.50608	1
49	Eif2s3y		0.30747	0.159978	0.276704	SPIKE	22	3.67	13.29	4	14.5	5.5	0.75		0.000514	0.00089	1.55006	1
519	Gm38525		0.30747	0.159978	0.276704	SPIKE	19	4.75	15.44	6	19.5	4.75	0.25		0.000514	0.00089	1.55006	1
642	Gm35438		0.30757	0.159978	0.276704	SPIKE	19	0	8.31	0	10.5	4.75	0.75		0.000513	0.00089	1.54423	1
644	St6galnac3		0.307374	0.160918	0.276891	SPIKE	18	12	1.88	16	2.5	4.5	0.75		0.000516	0.000892	1.55569	1
692	Eda		0.307212	0.160918	0.276891	NSPIKE	20	16.25	5	19.5	6	15	0.75		0.00052	0.000895	1.56528	1
852	Hhat		0.307158	0.160918	0.276891	SPIKE	33	27.5	11	20	8	11	0.5		0.000521	0.000896	1.56846	1
486	Cyb5rl		0.307013	0.162938	0.279884	COS	21	1.75	12.25	2	14	21	0.5		0.000523	0.000899	1.57713	1
864	Tacr1		0.306195	0.163818	0.28043	SPIKE	23	3.83	15.33	4	16	7.67	0.5		0.00054	0.000924	1.6266	1
945	Bche		0.306224	0.163818	0.28043	NSPIKE	27	22.5	9	20	8	20.25	0.5		0.000539	0.000924	1.62483	1
278	Gm8330		0.306087	0.164848	0.281228	SPIKE	24	4	16	4	16	6	0.5		0.000542	0.000926	1.6332	1
406	Lin28b		0.30599	0.164848	0.281228	SPIKE	20	10	18.75	12	22.5	5	0.75		0.000544	0.000928	1.6392	1
103	Trpm2		0.304923	0.169448	0.286761	NSPIKE	33	24.06	5.5	17.5	4	24.75	0.75		0.000566	0.00096	1.70643	1
142	Casr		0.304912	0.169448	0.286761	SPIKE	22	5.5	15.12	6	16.5	5.5	0.75		0.000567	0.00096	1.70711	1
728	Smpd5		0.305083	0.169448	0.286761	SPIKE	32	8	24	6	18	8	0.5		0.000563	0.000957	1.69617	1
816	Galntl6		0.304875	0.169528	0.286761	NSPIKE	35	14.58	32.08	10	22	29.17	0.5		0.000567	0.00096	1.70949	1
938	Taf4b		0.305234	0.169448	0.286761	NSPIKE	28	14	0	12	0	21	0.5		0.00056	0.000953	1.68657	1
462	Myof		0.304605	0.171668	0.287793	SPIKE	18	12	1.88	16	2.5	4.5	0.75		0.000573	0.000965	1.72691	1
529	Ttpa		0.304563	0.171668	0.287793	NSPIKE	19	16.23	7.92	20.5	10	14.25	0.25		0.000574	0.000965	1.72968	1
607	Afmid		0.304559	0.171668	0.287793	SPIKE	19	9.5	1.19	12	1.5	4.75	0.25		0.000574	0.000965	1.72992	1
783	Gm5876		0.304122	0.171868	0.287793	NSPIKE	20	15	5	18	6	13.33	0.5		0.000584	0.000977	1.75853	1
947	Pls1		0.304762	0.171668	0.287793	SPIKE	20	11.67	1.67	14	2	6.67	0.5		0.00057	0.000962	1.71677	1
949	Slc8a3		0.304466	0.171668	0.287793	COS	27	22.5	9	20	8	27	0.5		0.000576	0.000966	1.73597	1
136	Gfra1		0.303464	0.175288	0.29205	SPIKE	32	24	6	18	4.5	8	0.75		0.000598	0.000997	1.80243	1
472	Tmem232		0.303629	0.175288	0.29205	SPIKE	18	0	7.88	0	10.5	4.5	0.75		0.000595	0.000992	1.79132	1
586	BC049352		0.303753	0.175128	0.29205	SPIKE	22	3.67	13.29	4	14.5	5.5	0.75		0.000592	0.000989	1.78302	1
140	Adora2a		0.303046	0.176388	0.292904	SPIKE	32	5.33	21.33	4	16	5.33	0.5		0.000608	0.001011	1.83084	1
202	Kmt5c		0.302923	0.176388	0.292904	SPIKE	19	17.42	9.1	22	11.5	4.75	0.25		0.00061	0.001014	1.83928	1
91	Glb1l2		0.302585	0.178928	0.294185	SPIKE	35	32.08	14.58	22	10	5.83	0.5		0.000618	0.001017	1.86263	1
152	Fignl1		0.302585	0.178928	0.294185	SPIKE	18	0	9	0	12	3	0.5		0.000618	0.001017	1.86263	1
439	Gm31365		0.302585	0.178928	0.294185	SPIKE	32	16	0	12	0	8	0.5		0.000618	0.001017	1.86263	1
460	Fiz1		0.30258	0.178928	0.294185	SPIKE	23	3.83	15.33	4	16	3.83	0.5		0.000618	0.001017	1.863	1
909	Gucy2f		0.302585	0.178928	0.294185	SPIKE	24	12	0	12	0	8	0.5		0.000618	0.001017	1.86263	1
976	Gm45972		0.302585	0.178928	0.294185	SPIKE	24	12	0	12	0	8	0.5		0.000618	0.001017	1.86263	1
371	Gdf9		0.301692	0.183128	0.29961	NSPIKE	20	16.25	5	19.5	6	15	0.75		0.000639	0.001047	1.92574	1
423	Cenpk		0.301822	0.183128	0.29961	SPIKE	33	30.25	15.81	22	11.5	8.25	0.25		0.000636	0.001044	1.9164	1
743	Spata1		0.301622	0.183128	0.29961	SPIKE	18	0	9	0	12	3	0.5		0.000641	0.001048	1.93078	1
489	Plekhg2		0.301382	0.185068	0.302288	SPIKE	32	5.33	21.33	4	16	5.33	0.5		0.000647	0.001056	1.94808	1
369	Gen1		0.3	0.188888	0.308023	SPIKE	28	21	8.75	18	7.5	7	0.25		0.000681	0.00111	2.05068	1
440	2810433D01Rik		0.299078	0.193388	0.314847	NSPIKE	18	9	0	12	0	15	0.5		0.000704	0.001147	2.12184	1
109	Clcn1		0.298871	0.195298	0.3154	SPIKE	27	18	4.5	16	4	9	0.5		0.00071	0.001152	2.1382	1
303	Ccbe1		0.29836	0.195308	0.3154	SPIKE	33	8.25	24.75	6	18	11	0.5		0.000723	0.00117	2.17891	1
492	Slc5a7		0.298967	0.195038	0.3154	SPIKE	29	4.83	21.15	4	17.5	7.25	0.25		0.000707	0.001149	2.13058	1
572	Cyth4		0.298142	0.195308	0.3154	SPIKE	20	5	16.25	6	19.5	5	0.25		0.000729	0.001177	2.19645	1
881	Gm35835		0.29836	0.195308	0.3154	SPIKE	22	7.33	16.96	8	18.5	5.5	0.75		0.000723	0.00117	2.17891	1
960	Gm11419		0.297667	0.200338	0.323001	SPIKE	34	28.33	9.21	20	6.5	8.5	0.75		0.000742	0.001196	2.23531	1
41	Gm30439		0.297088	0.201388	0.323648	NSPIKE	33	19.25	2.75	14	2	22	0.5		0.000758	0.00122	2.28343	1
997	Npnt		0.297037	0.201388	0.323648	SPIKE	28	7	19.25	6	16.5	7	0.75		0.000759	0.00122	2.2877	1
34	Adamts18		0.296432	0.203228	0.323877	SPIKE	18	10.5	1.5	14	2	4.5	0.5		0.000776	0.001238	2.33903	1
108	Cyth1		0.296169	0.203478	0.323877	SPIKE	18	4.5	12.38	6	16.5	4.5	0.75		0.000784	0.001248	2.36174	1
139	Msh5		0.296432	0.203228	0.323877	SPIKE	35	32.08	12.4	22	8.5	8.75	0.75		0.000776	0.001238	2.33903	1
296	Rxfp1		0.296586	0.203228	0.323877	NSPIKE	20	16.25	5	19.5	6	15	0.75		0.000772	0.001238	2.32592	1
506	LOC118568080		0.296432	0.203228	0.323877	SPIKE	19	14.25	3.56	18	4.5	4.75	0.75		0.000776	0.001238	2.33903	1
546	Bfsp1		0.296432	0.203228	0.323877	SPIKE	18	12	1.88	16	2.5	4.5	0.75		0.000776	0.001238	2.33903	1
663	Aloxe3		0.295863	0.207058	0.328528	NSPIKE	33	24.75	8.25	18	6	22	0.5		0.000793	0.001258	2.38835	1
812	Spag6		0.295899	0.207058	0.328528	SPIKE	19	15.83	7.52	20	9.5	4.75	0.25		0.000792	0.001258	2.38523	1
182	Colca2		0.295205	0.210548	0.332479	SPIKE	30	20	5	16	4	7.5	0.5		0.000812	0.001281	2.44657	1
758	Fam193b		0.29554	0.210428	0.332479	SPIKE	29	2.42	16.92	2	14	4.83	0.5		0.000802	0.001271	2.41676	1
950	Myo15b		0.295205	0.210548	0.332479	SPIKE	32	24	8	18	6	8	0.5		0.000812	0.001281	2.44657	1
599	Ifi203		0.294884	0.211278	0.332579	NSPIKE	18	16.12	6	21.5	8	13.5	0.75		0.000822	0.001293	2.47544	1
809	Klk1b5		0.295181	0.211078	0.332579	SPIKE	24	0	10.5	0	10.5	6	0.75		0.000813	0.001281	2.44873	1
46	Sema3b		0.294008	0.214288	0.334678	SPIKE	18	16.5	7.5	22	10	6	0.5		0.000848	0.001329	2.55582	1
283	Top2a		0.294003	0.214288	0.334678	SPIKE	19	6.33	15.83	8	20	3.17	0.5		0.000848	0.001329	2.55626	1
471	Pheta2		0.293805	0.214288	0.334678	SPIKE	25	6.25	17.19	6	16.5	6.25	0.75		0.000855	0.001335	2.57481	1
618	Dydc2		0.293859	0.214288	0.334678	SPIKE	24	6	16.5	6	16.5	6	0.75		0.000853	0.001334	2.56972	1
865	2010315B03Rik		0.294008	0.214288	0.334678	SPIKE	25	6.25	17.19	6	16.5	6.25	0.75		0.000848	0.001329	2.55582	1
581	Zbed4		0.293294	0.218588	0.339799	NSPIKE	28	0	14	0	12	18.67	0.5		0.000871	0.001353	2.62307	1
680	Ptchd4		0.293457	0.218398	0.339799	SPIKE	34	25.5	6.38	18	4.5	8.5	0.75		0.000865	0.00135	2.60761	1
791	1700073E17Rik		0.293294	0.218588	0.339799	NSPIKE	24	16	4	16	4	18	0.5		0.000871	0.001353	2.62307	1
537	Dusp15		0.292481	0.220848	0.342778	ACOS	34	19.83	14.17	14	10	34	0.17		0.000897	0.001392	2.70169	1
71	Frem1		0.292153	0.223098	0.344129	SPIKE	35	0	15.31	0	10.5	8.75	0.75		0.000907	0.0014	2.73397	1
102	Washc1		0.292153	0.223098	0.344129	SPIKE	34	14.17	33.29	10	23.5	8.5	0.25		0.000907	0.0014	2.73397	1
141	Fndc1		0.292153	0.223098	0.344129	SPIKE	18	10.5	1.5	14	2	4.5	0.5		0.000907	0.0014	2.73397	1
212	Baiap2l2		0.292153	0.223098	0.344129	SPIKE	35	26.25	10.94	18	7.5	8.75	0.25		0.000907	0.0014	2.73397	1
302	Il1rn		0.291865	0.224468	0.344921	ACOS	31	2.58	2.58	2	2	31	0		0.000917	0.001412	2.76266	1
514	Homer3		0.291624	0.224648	0.344921	SPIKE	18	10.5	1.5	14	2	3	0.5		0.000925	0.00142	2.78691	1
794	Htr4		0.291826	0.224468	0.344921	SPIKE	25	6.25	17.19	6	16.5	6.25	0.75		0.000918	0.001412	2.76657	1
81	Lair1		0.290961	0.228258	0.348853	SPIKE	25	8.33	22.4	8	21.5	6.25	0.25		0.000947	0.00145	2.85443	1
457	Slc43a3		0.290846	0.228258	0.348853	SPIKE	32	5.33	19.33	4	14.5	8	0.75		0.000951	0.001454	2.86632	1
860	C1qtnf6		0.290994	0.228258	0.348853	NSPIKE	20	3.75	15	4.5	18	15	0.25		0.000946	0.00145	2.85107	1
404	Dok3		0.289775	0.231558	0.353356	SPIKE	19	15.83	5.15	20	6.5	4.75	0.75		0.000989	0.001509	2.97915	1
286	Kif24		0.289683	0.233528	0.355818	ACOS	31	2.58	2.58	2	2	31	0		0.000992	0.001512	2.98904	1
24	Platr25		0.289391	0.235698	0.357356	SPIKE	18	12	1.88	16	2.5	4.5	0.75		0.001002	0.001525	3.02051	1
604	Spsb1		0.289138	0.236328	0.357356	SPIKE	22	3.67	13.29	4	14.5	5.5	0.75		0.001012	0.00153	3.0481	1
784	Acnat2		0.289157	0.236328	0.357356	SPIKE	29	0	16.31	0	13.5	7.25	0.25		0.001011	0.00153	3.04599	1
819	LOC118567481		0.28925	0.236328	0.357356	SPIKE	19	11.08	1.58	14	2	4.75	0.5		0.001008	0.00153	3.03592	1
932	Adgrg6		0.289181	0.236328	0.357356	SPIKE	32	0	16	0	12	10.67	0.5		0.00101	0.00153	3.04344	1
96	Myo9b		0.288408	0.240988	0.360728	SPIKE	18	4.5	12.38	6	16.5	4.5	0.75		0.001039	0.001561	3.12902	1
269	T2		0.288052	0.241088	0.360728	NSPIKE	18	10.5	1.5	14	2	12	0.5		0.001052	0.001574	3.1691	1
298	Rttn		0.288408	0.240988	0.360728	SPIKE	30	2.5	17.5	2	14	5	0.5		0.001039	0.001561	3.12902	1
441	Cd36		0.288409	0.240988	0.360728	SPIKE	34	25.5	10.62	18	7.5	8.5	0.25		0.001038	0.001561	3.12888	1
533	Trim30a		0.288838	0.239198	0.360728	ACOS	18	9	9	12	12	18	0		0.001023	0.001544	3.08108	1
571	Dhx37		0.288162	0.241088	0.360728	NSPIKE	20	15	5	18	6	13.33	0.5		0.001048	0.00157	3.15666	1
696	Bmp3		0.288278	0.241038	0.360728	SPIKE	20	18.33	7.08	22	8.5	5	0.75		0.001043	0.001566	3.14356	1
79	Tnnt3		0.287746	0.241758	0.361189	SPIKE	31	0	13.56	0	10.5	7.75	0.75		0.001063	0.001589	3.20402	1
727	Zfp14		0.287243	0.244158	0.364229	SPIKE	25	10.42	21.35	10	20.5	6.25	0.75		0.001083	0.001615	3.26214	1
95	Incenp		0.286693	0.244718	0.36452	SPIKE	18	4.5	12.38	6	16.5	4.5	0.75		0.001104	0.001645	3.32684	1
187	Atad2		0.286515	0.250057	0.371365	SPIKE	28	21	8.75	18	7.5	7	0.25		0.001111	0.00165	3.34799	1
832	D130007C19Rik		0.286606	0.250057	0.371365	SPIKE	19	9.5	0	12	0	6.33	0.5		0.001108	0.001647	3.33716	1
67	Pglyrp2		0.285328	0.253857	0.372026	SPIKE	28	4.67	16.92	4	14.5	7	0.75		0.001159	0.001699	3.49242	1
184	Gm31588		0.28542	0.253857	0.372026	SPIKE	22	5.5	16.5	6	18	7.33	0.5		0.001155	0.001696	3.48097	1
197	Gm35371		0.28542	0.253857	0.372026	SPIKE	20	3.33	12.08	4	14.5	5	0.75		0.001155	0.001696	3.48097	1
200	Npr3		0.286297	0.252387	0.372026	SPIKE	20	13.33	4.58	16	5.5	5	0.25		0.00112	0.001658	3.37409	1
623	Foxp3		0.28545	0.253857	0.372026	SPIKE	26	4.33	17.33	4	16	4.33	0.5		0.001154	0.001696	3.47731	1
754	A730094K22Rik		0.28542	0.253857	0.372026	SPIKE	22	9.17	20.17	10	22	7.33	0.5		0.001155	0.001696	3.48097	1
866	H1f3		0.285659	0.253537	0.372026	NSPIKE	32	18	0	13.5	0	24	0.75		0.001146	0.001691	3.45158	1
897	Tbc1d32		0.286294	0.252387	0.372026	SPIKE	32	16	0	12	0	8	0.5		0.00112	0.001658	3.3744	1
987	Gapdh-ps14		0.285832	0.252567	0.372026	SPIKE	20	5	16.25	6	19.5	5	0.25		0.001139	0.001683	3.43038	1
490	Dnah7c		0.28389	0.261507	0.381556	ACOS	33	16.5	11	12	8	33	0.17		0.00122	0.001782	3.67493	1
578	Shc4		0.283999	0.261507	0.381556	SPIKE	22	3.67	13.29	4	14.5	5.5	0.75		0.001215	0.001778	3.66074	1
580	Pcsk5		0.283837	0.261507	0.381556	SPIKE	24	20	9.5	20	9.5	6	0.25		0.001222	0.001783	3.68185	1
281	Gal3st1		0.283601	0.262517	0.381913	NSPIKE	19	16.23	7.92	20.5	10	14.25	0.25		0.001232	0.001793	3.71267	1
963	Syndig1l		0.283662	0.262517	0.381913	NSPIKE	28	25.67	11.67	22	10	18.67	0.5		0.00123	0.001791	3.7046	1
65	Oxt		0.283433	0.265527	0.384515	NSPIKE	18	16.5	7.5	22	10	13.5	0.5		0.00124	0.001801	3.73467	1
231	Phldb2		0.283279	0.265707	0.384515	NSPIKE	32	24	8	18	6	24	0.5		0.001246	0.001806	3.7551	1
886	Papss2		0.283261	0.265707	0.384515	SPIKE	23	3.83	16.77	4	17.5	5.75	0.25		0.001247	0.001806	3.75746	1
923	Gm30341		0.282958	0.265847	0.384515	NSPIKE	20	0	10	0	12	13.33	0.5		0.00126	0.001823	3.79781	1
55	Kif14		0.282609	0.267737	0.386689	SPIKE	31	0	13.56	0	10.5	7.75	0.75		0.001276	0.001843	3.8448	1
84	Cdca2		0.281664	0.273787	0.3896	SPIKE	34	2.83	19.83	2	14	11.33	0.5		0.001319	0.001889	3.97471	1
128	Phf19		0.281997	0.271897	0.3896	SPIKE	34	2.83	19.83	2	14	11.33	0.5		0.001304	0.001878	3.9285	1
332	Zfp853		0.281821	0.272697	0.3896	SPIKE	21	3.5	12.69	4	14.5	5.25	0.75		0.001312	0.001884	3.9529	1
427	Slc28a2		0.280912	0.274047	0.3896	SPIKE	20	16.67	7.92	20	9.5	5	0.25		0.001354	0.001926	4.08095	1
444	Ctc1		0.281821	0.272697	0.3896	SPIKE	23	5.75	18.69	6	19.5	5.75	0.25		0.001312	0.001884	3.9529	1
626	Fmod		0.281118	0.273927	0.3896	NSPIKE	20	3.33	13.33	4	16	15	0.5		0.001345	0.001914	4.05165	1
689	Pus1		0.281993	0.271897	0.3896	NSPIKE	27	14.06	2.25	12.5	2	20.25	0.25		0.001304	0.001878	3.92908	1
738	Fam20a		0.281579	0.273787	0.3896	NSPIKE	28	23.92	11.67	20.5	10	21	0.25		0.001323	0.001892	3.9866	1
803	Gjc1		0.281664	0.273787	0.3896	SPIKE	22	7.33	18.33	8	20	7.33	0.5		0.001319	0.001889	3.97471	1
817	Pm20d1		0.281293	0.273927	0.3896	NSPIKE	18	16.5	7.5	22	10	13.5	0.5		0.001337	0.001908	4.0269	1
925	Vsig10l		0.281118	0.273927	0.3896	NSPIKE	32	16	0	12	0	26.67	0.5		0.001345	0.001914	4.05165	1
58	Neb		0.280566	0.276127	0.391266	SPIKE	22	0	12.38	0	13.5	5.5	0.25		0.001371	0.001944	4.13079	1
660	Dennd2c		0.280445	0.276787	0.391266	SPIKE	24	10	23.5	10	23.5	6	0.25		0.001377	0.001948	4.14834	1
861	Hgf		0.280391	0.276787	0.391266	NSPIKE	32	16.67	2.67	12.5	2	24	0.25		0.001379	0.001948	4.15614	1
899	Fam78a		0.280566	0.276127	0.391266	NSPIKE	19	11.48	3.17	14.5	4	14.25	0.25		0.001371	0.001944	4.13079	1
699	Mdc1		0.280373	0.279417	0.394425	SPIKE	34	14.17	29.04	10	20.5	8.5	0.75		0.00138	0.001948	4.15871	1
709	Prg4		0.279715	0.285597	0.402579	SPIKE	18	0	9	0	12	3	0.5		0.001412	0.001991	4.25543	1
391	Gm5706		0.278923	0.286317	0.403025	SPIKE	22	5.5	15.12	6	16.5	5.5	0.75		0.001452	0.002044	4.37461	1
250	Brat1		0.278034	0.289327	0.40441	NSPIKE	24	12.5	2	12.5	2	18	0.25		0.001498	0.002096	4.51205	1
349	Tiam2		0.278252	0.288837	0.40441	NSPIKE	18	5.62	13.5	7.5	18	13.5	0.75		0.001486	0.002083	4.47804	1
504	Gpr82		0.278575	0.288447	0.40441	NSPIKE	30	28.12	15	22.5	12	22.5	0.25		0.00147	0.002063	4.42802	1
631	Dao		0.277909	0.289327	0.40441	SPIKE	30	2.5	17.5	2	14	10	0.5		0.001504	0.002102	4.53169	1
870	Hlcs		0.278774	0.288447	0.40441	NSPIKE	18	7.5	16.5	10	22	12	0.5		0.001459	0.002051	4.39738	1
262	Sp140		0.277668	0.291657	0.407096	ACOS	33	27.5	2.75	20	2	33	0.75		0.001517	0.002117	4.56979	1
875	Gm11009		0.277561	0.295447	0.41181	SPIKE	28	14	0	12	0	9.33	0.5		0.001522	0.002122	4.5867	1
723	Ggt1		0.276914	0.297987	0.414771	NSPIKE	35	23.33	5.83	16	4	23.33	0.5		0.001557	0.002167	4.69077	1
32	Efcab5		0.2768	0.300027	0.416051	SPIKE	35	5.83	23.33	4	16	8.75	0.5		0.001563	0.00217	4.70934	1
648	Wnt11		0.276847	0.300027	0.416051	SPIKE	32	8	24	6	18	10.67	0.5		0.00156	0.002169	4.7017	1
958	Gm33938		0.276615	0.300157	0.416051	SPIKE	19	9.5	1.19	12	1.5	4.75	0.25		0.001573	0.00218	4.73945	1
192	Myo3b		0.275584	0.302337	0.417912	SPIKE	34	19.83	2.83	14	2	8.5	0.5		0.00163	0.002253	4.91124	1
730	Rtel1		0.275728	0.302327	0.417912	NSPIKE	18	7.5	16.5	10	22	12	0.5		0.001622	0.002245	4.88702	1
431	Stac		0.275211	0.307177	0.424015	NSPIKE	18	16.5	7.5	22	10	13.5	0.5		0.001651	0.002279	4.97485	1
429	Arhgef19		0.274702	0.309677	0.426286	SPIKE	28	7	19.25	6	16.5	7	0.75		0.00168	0.002313	5.06265	1
651	Gm31288		0.274874	0.309477	0.426286	SPIKE	26	21.67	10.29	20	9.5	6.5	0.25		0.00167	0.002303	5.0329	1
508	Gm18848		0.274222	0.310327	0.426593	NSPIKE	28	0	14	0	12	18.67	0.5		0.001708	0.002348	5.14697	1
759	Gm26777		0.274153	0.312947	0.429602	SPIKE	26	0	13	0	12	8.67	0.5		0.001712	0.002351	5.15903	1
432	Stra6		0.273509	0.314287	0.430286	SPIKE	22	3.67	13.29	4	14.5	5.5	0.75		0.001751	0.0024	5.27428	1
920	Glis1		0.273297	0.314307	0.430286	SPIKE	24	22	10	22	10	8	0.5		0.001763	0.002414	5.31269	1
291	Col13a1		0.272681	0.322137	0.438409	NSPIKE	22	21.54	9.17	23.5	10	16.5	0.75		0.001801	0.002455	5.42586	1
305	Piezo2		0.272513	0.322437	0.438409	SPIKE	32	0	16	0	12	10.67	0.5		0.001811	0.002466	5.45701	1
593	Csf2ra		0.272444	0.322437	0.438409	SPIKE	31	28.42	12.92	22	10	10.33	0.5		0.001815	0.002468	5.46988	1
597	Sdc1		0.272699	0.322137	0.438409	SPIKE	24	14	0.5	14	0.5	6	0.75		0.0018	0.002455	5.42256	1
796	Prokr1		0.272681	0.322137	0.438409	NSPIKE	19	12.27	1.58	15.5	2	14.25	0.75		0.001801	0.002455	5.42586	1
627	Lzts1		0.271586	0.324567	0.440704	NSPIKE	18	8.62	16.5	11.5	22	13.5	0.75		0.001869	0.002538	5.63237	1
150	Crhr1		0.27084	0.329667	0.447021	SPIKE	25	6.25	17.19	6	16.5	6.25	0.75		0.001917	0.002599	5.77717	1
223	Kif23		0.270759	0.331217	0.447905	SPIKE	27	0	11.81	0	10.5	6.75	0.75		0.001923	0.0026	5.793	1
679	Hmcn1		0.270815	0.331217	0.447905	SPIKE	18	0	9	0	12	3	0.5		0.001919	0.002599	5.78203	1
74	Wdr62		0.270398	0.334487	0.451715	NSPIKE	30	12.5	27.5	10	22	20	0.5		0.001946	0.002629	5.86446	1
117	Tnfrsf14		0.269991	0.335427	0.451843	SPIKE	18	4.5	13.5	6	18	6	0.5		0.001973	0.00266	5.94594	1
624	Stum		0.269961	0.335487	0.451843	ACOS	34	19.83	14.17	14	10	34	0.17		0.001975	0.00266	5.95201	1
107	Gm31614		0.269763	0.336667	0.452212	SPIKE	24	22	10	22	10	8	0.5		0.001989	0.002671	5.99194	1
823	Snx31		0.269928	0.336637	0.452212	ACOS	33	8.25	8.25	6	6	33	0		0.001978	0.00266	5.95861	1
294	Odf3l1		0.26953	0.337237	0.452368	SPIKE	19	7.92	16.23	10	20.5	4.75	0.75		0.002004	0.002689	6.03941	1
477	Dcdc5		0.268664	0.340207	0.45452	NSPIKE	24	20.5	10	20.5	10	18	0.25		0.002064	0.002761	6.21876	1
616	Ttf1		0.269062	0.339437	0.45452	ACOS	32	2.67	24	2	18	32	0.33		0.002036	0.002728	6.13574	1
907	Tmem190		0.268608	0.340207	0.45452	SPIKE	24	4	16	4	16	6	0.5		0.002068	0.002763	6.23064	1
289	Slc44a5		0.26815	0.344917	0.458969	SPIKE	29	4.83	19.33	4	16	4.83	0.5		0.0021	0.002795	6.3276	1
509	Lpxn		0.26815	0.344917	0.458969	SPIKE	35	0	19.69	0	13.5	8.75	0.25		0.0021	0.002795	6.3276	1
643	C8g		0.26815	0.344917	0.458969	SPIKE	18	12	1.88	16	2.5	4.5	0.75		0.0021	0.002795	6.3276	1
780	H2-M10.3		0.266711	0.352526	0.468113	SPIKE	21	10.5	19.69	12	22.5	5.25	0.75		0.002204	0.002929	6.64118	1
877	Tbc1d31		0.266569	0.352726	0.468113	SPIKE	30	15	28.12	12	22.5	7.5	0.75		0.002215	0.002939	6.67289	1
914	Ddx4		0.265934	0.359286	0.476186	SPIKE	19	15.83	7.52	20	9.5	4.75	0.25		0.002262	0.002998	6.81616	1
310	Rskr		0.265411	0.360096	0.476626	SPIKE	26	0	14.62	0	13.5	6.5	0.25		0.002302	0.003047	6.93654	1
38	Ccdc15		0.264133	0.366566	0.478839	ACOS	31	2.58	7.75	2	6	31	0.83		0.002402	0.003142	7.23839	1
88	Zfp536		0.264394	0.365766	0.478839	SPIKE	24	10	23.5	10	23.5	6	0.25		0.002382	0.003127	7.17573	1
227	Mmgt2		0.264234	0.366566	0.478839	SPIKE	19	7.92	16.23	10	20.5	4.75	0.75		0.002394	0.00314	7.21415	1
232	Fmo4		0.264575	0.365346	0.478839	NSPIKE	20	3.75	15	4.5	18	15	0.25		0.002367	0.003121	7.1326	1
256	Misp		0.264044	0.366566	0.478839	SPIKE	24	12	0	12	0	8	0.5		0.002409	0.003145	7.25972	1
412	Fam76b		0.264962	0.362306	0.478839	SPIKE	18	7.5	15.38	10	20.5	4.5	0.75		0.002337	0.003089	7.04129	1
481	Cep131		0.26453	0.365346	0.478839	SPIKE	18	4.5	12.38	6	16.5	4.5	0.75		0.002371	0.003121	7.1433	1
544	Slc26a4		0.264575	0.365346	0.478839	NSPIKE	28	19.25	7	16.5	6	21	0.25		0.002367	0.003121	7.1326	1
681	Smg9		0.264133	0.366566	0.478839	ACOS	34	8.5	14.17	6	10	34	0.83		0.002402	0.003142	7.23839	1
750	Slc6a5		0.264448	0.365476	0.478839	SPIKE	34	2.83	19.83	2	14	11.33	0.5		0.002377	0.003126	7.16286	1
44	Tulp2		0.263825	0.371526	0.482163	SPIKE	19	17.42	7.92	22	10	4.75	0.5		0.002427	0.00315	7.31297	1
205	Cep55		0.263909	0.371426	0.482163	SPIKE	20	8.33	17.08	10	20.5	5	0.75		0.00242	0.003145	7.29249	1
555	Col19a1		0.263909	0.371426	0.482163	SPIKE	27	18	4.5	16	4	9	0.5		0.00242	0.003145	7.29249	1
658	Fgg		0.263909	0.371426	0.482163	SPIKE	20	10	18.75	12	22.5	5	0.75		0.00242	0.003145	7.29249	1
725	Pon3		0.263909	0.371426	0.482163	SPIKE	24	6	16.5	6	16.5	6	0.75		0.00242	0.003145	7.29249	1
327	Zfp661		0.263047	0.374886	0.485892	NSPIKE	18	8.62	16.5	11.5	22	13.5	0.75		0.002491	0.003228	7.50425	1
425	Fanci		0.262325	0.376266	0.486071	ACOS	22	11	12.83	12	14	22	0.92		0.002551	0.003302	7.68569	1
454	Zdhhc15		0.26219	0.376286	0.486071	ACOS	28	9.33	9.33	8	8	28	0		0.002562	0.003312	7.72019	1
807	Asxl3		0.262119	0.376486	0.486071	NSPIKE	35	8.75	26.25	6	18	23.33	0.5		0.002568	0.003316	7.7383	1
156	P2ry14		0.261785	0.377636	0.486298	SPIKE	35	32.08	14.58	22	10	5.83	0.5		0.002597	0.003344	7.82418	1
890	Cnga3		0.261947	0.377636	0.486298	SPIKE	18	7.5	15.38	10	20.5	4.5	0.75		0.002583	0.003331	7.78254	1
170	Ptprb		0.260862	0.388726	0.496733	SPIKE	32	16	0	12	0	8	0.5		0.002677	0.003421	8.06599	1
260	Esrrb		0.261173	0.388516	0.496733	SPIKE	19	9.5	1.19	12	1.5	4.75	0.25		0.00265	0.003395	7.98382	1
401	Pkmyt1		0.261455	0.386426	0.496733	SPIKE	20	15	5	18	6	6.67	0.5		0.002625	0.003376	7.90996	1
499	Lemd1		0.261173	0.388516	0.496733	SPIKE	32	29.33	15.33	22	11.5	8	0.25		0.00265	0.003395	7.98382	1
700	Sapcd2		0.260931	0.388726	0.496733	SPIKE	25	6.25	17.19	6	16.5	6.25	0.75		0.002671	0.003418	8.0477	1
948	Evpl		0.261357	0.388516	0.496733	SPIKE	24	16	2.5	16	2.5	6	0.75		0.002634	0.003383	7.93553	1
940	Nphp4		0.260625	0.389266	0.496787	ACOS	28	0	18.67	0	16	28	0.33		0.002698	0.003443	8.12913	1
153	Fblim1		0.259783	0.391306	0.498117	SPIKE	18	16.5	7.5	22	10	6	0.5		0.002774	0.003533	8.35708	1
206	Clasrp		0.25976	0.391306	0.498117	SPIKE	20	10	1.25	12	1.5	5	0.25		0.002776	0.003533	8.36339	1
473	Tpx2		0.259554	0.393556	0.499071	NSPIKE	32	11.33	29.33	8.5	22	24	0.25		0.002795	0.003544	8.42006	1
577	Tmprss5		0.259554	0.393556	0.499071	NSPIKE	18	2.62	10.5	3.5	14	13.5	0.75		0.002795	0.003544	8.42006	1
878	Chst3		0.259554	0.393556	0.499071	NSPIKE	18	7.5	16.5	10	22	13.5	0.5		0.002795	0.003544	8.42006	1
100	Gpr160		0.259131	0.398136	0.504238	SPIKE	23	3.83	13.9	4	14.5	5.75	0.75		0.002834	0.003589	8.53757	1
351	Tmem269		0.258777	0.399666	0.505534	SPIKE	24	4	16	4	16	6	0.5		0.002867	0.003626	8.63719	1
461	Rnf183		0.258406	0.403796	0.507542	SPIKE	19	15.83	5.15	20	6.5	4.75	0.75		0.002902	0.003652	8.74258	1
705	Fer1l5		0.258406	0.403796	0.507542	SPIKE	18	13.5	5.62	18	7.5	4.5	0.25		0.002902	0.003652	8.74258	1
717	Nlrp6		0.258406	0.403796	0.507542	SPIKE	18	4.5	12.38	6	16.5	4.5	0.75		0.002902	0.003652	8.74258	1
834	Ndst3		0.258311	0.403796	0.507542	NSPIKE	18	7.88	0	10.5	0	13.5	0.25		0.002911	0.003658	8.76977	1
985	Gm15624		0.258406	0.403796	0.507542	SPIKE	35	32.08	12.4	22	8.5	8.75	0.75		0.002902	0.003652	8.74258	1
659	Ccdc61		0.25797	0.405266	0.50811	NSPIKE	30	28.12	15	22.5	12	22.5	0.25		0.002943	0.003695	8.8679	1
918	Arid3a		0.257752	0.405266	0.50811	SPIKE	33	30.25	13.75	22	10	5.5	0.5		0.002964	0.003716	8.93113	1
343	Acnat1		0.257628	0.407546	0.509687	SPIKE	35	2.92	20.42	2	14	11.67	0.5		0.002976	0.003722	8.96728	1
771	Dnah7a		0.257658	0.407546	0.509687	SPIKE	32	16	2	12	1.5	8	0.25		0.002973	0.003722	8.95837	1
969	A630001G21Rik		0.257274	0.408056	0.509687	SPIKE	32	24	8	18	6	8	0.5		0.003011	0.003761	9.07119	1
185	Alpk1		0.256776	0.412856	0.509938	SPIKE	20	8.33	17.08	10	20.5	5	0.75		0.00306	0.003779	9.21923	1
225	Stra6l		0.256868	0.412856	0.509938	ACOS	35	14.58	14.58	10	10	35	0		0.003051	0.003779	9.19187	1
359	Gm14326		0.256776	0.412856	0.509938	SPIKE	24	6	16.5	6	16.5	6	0.75		0.00306	0.003779	9.21923	1
469	2600014E21Rik		0.256776	0.412856	0.509938	SPIKE	32	0	16	0	12	5.33	0.5		0.00306	0.003779	9.21923	1
498	Kdf1		0.256994	0.412776	0.509938	SPIKE	35	2.92	18.23	2	12.5	8.75	0.75		0.003038	0.003779	9.15424	1
574	Sh3d21		0.256776	0.412856	0.509938	SPIKE	24	6	16.5	6	16.5	6	0.75		0.00306	0.003779	9.21923	1
576	Sp100		0.256776	0.412856	0.509938	SPIKE	24	10	20.5	10	20.5	6	0.75		0.00306	0.003779	9.21923	1
739	Rarres1		0.256994	0.412776	0.509938	SPIKE	22	20.17	10.54	22	11.5	5.5	0.25		0.003038	0.003779	9.15424	1
910	Ly6c2		0.256776	0.412856	0.509938	SPIKE	24	8	20	8	20	4	0.5		0.00306	0.003779	9.21923	1
559	H2-M5		0.255883	0.415526	0.511338	NSPIKE	28	0	14	0	12	18.67	0.5		0.00315	0.003876	9.49032	1
638	Gm11907		0.255883	0.415526	0.511338	NSPIKE	27	4.5	18	4	16	18	0.5		0.00315	0.003876	9.49032	1
905	Abcc4		0.255883	0.415526	0.511338	NSPIKE	20	11.25	0	13.5	0	15	0.75		0.00315	0.003876	9.49032	1
384	P2rx2		0.255727	0.417906	0.513633	NSPIKE	35	20.42	2.92	14	2	23.33	0.5		0.003166	0.003891	9.53857	1
836	Crlf1		0.254543	0.426006	0.522944	SPIKE	20	15	3.75	18	4.5	5	0.75		0.003289	0.004038	9.91043	1
904	Gm38528		0.254216	0.427566	0.524214	SPIKE	24	14	0.5	14	0.5	6	0.75		0.003324	0.004075	10.0155	1
426	Rtp4		0.254147	0.428626	0.524869	SPIKE	18	12	1.88	16	2.5	4.5	0.75		0.003332	0.00408	10.0379	1
85	Mlip		0.252815	0.432386	0.524965	SPIKE	33	0	16.5	0	12	8.25	0.5		0.003477	0.004222	10.477	1
166	Gm48957		0.252815	0.432386	0.524965	SPIKE	19	1.58	12.27	2	15.5	4.75	0.25		0.003477	0.004222	10.477	1
313	Esrp1		0.253898	0.429756	0.524965	ACOS	35	11.67	14.58	8	10	35	0.92		0.003358	0.004102	10.1187	1
520	Cage1		0.253074	0.432386	0.524965	NSPIKE	27	6.75	20.25	6	18	18	0.5		0.003449	0.004207	10.3905	1
772	Ddx60		0.252815	0.432386	0.524965	SPIKE	19	1.58	12.27	2	15.5	4.75	0.25		0.003477	0.004222	10.477	1
986	Chrna9		0.252815	0.432386	0.524965	SPIKE	26	2.17	16.79	2	15.5	6.5	0.25		0.003477	0.004222	10.477	1
996	Wipf3		0.253963	0.429656	0.524965	SPIKE	18	12	3	16	4	4.5	0.5		0.003351	0.004099	10.0976	1
131	Car7		0.252413	0.437086	0.529383	ACOS	20	3.33	8.33	4	10	20	0.75		0.003522	0.004266	10.6128	1
293	Stxbp2		0.252539	0.437086	0.529383	NSPIKE	32	24	8	18	6	21.33	0.5		0.003508	0.004254	10.5701	1
68	Gm20515		0.2507	0.447286	0.533031	SPIKE	28	14	0	12	0	9.33	0.5		0.00372	0.004447	11.2098	1
83	Hfm1		0.250504	0.447576	0.533031	SPIKE	27	6.75	21.94	6	19.5	6.75	0.25		0.003744	0.004459	11.2803	1
134	Zfp764		0.250504	0.447576	0.533031	SPIKE	27	18	6.19	16	5.5	6.75	0.25		0.003744	0.004459	11.2803	1
159	Stkld1		0.251515	0.446166	0.533031	SPIKE	35	2.92	20.42	2	14	8.75	0.5		0.003625	0.004369	10.9223	1
276	Wdr27		0.250504	0.447576	0.533031	SPIKE	18	4.5	13.5	6	18	3	0.5		0.003744	0.004459	11.2803	1
316	Rnf135		0.250998	0.447066	0.533031	NSPIKE	32	8	24	6	18	21.33	0.5		0.003685	0.00441	11.104	1
365	1700010I14Rik		0.250998	0.447066	0.533031	NSPIKE	22	15.12	5.5	16.5	6	16.5	0.25		0.003685	0.00441	11.104	1
417	Grrp1		0.250998	0.447066	0.533031	NSPIKE	22	11	0	12	0	16.5	0.5		0.003685	0.00441	11.104	1
430	Tldc2		0.252265	0.441006	0.533031	ACOS	21	5.25	8.75	6	10	21	0.83		0.003539	0.004281	10.6635	1
569	Fam163a		0.250998	0.447066	0.533031	NSPIKE	32	24	8	18	6	21.33	0.5		0.003685	0.00441	11.104	1
677	2700049A03Rik		0.252015	0.442146	0.533031	SPIKE	18	12	1.88	16	2.5	4.5	0.75		0.003568	0.00431	10.7491	1
736	Fhdc1		0.250998	0.447066	0.533031	NSPIKE	24	22	10	22	10	16	0.5		0.003685	0.00441	11.104	1
760	Cep128		0.251394	0.446166	0.533031	SPIKE	30	10	23.12	8	18.5	7.5	0.75		0.003639	0.004381	10.9645	1
957	Tcf3		0.251979	0.443706	0.533031	SPIKE	19	15.83	7.52	20	9.5	4.75	0.25		0.003572	0.00431	10.7613	1
215	C130050O18Rik		0.249271	0.457835	0.54266	NSPIKE	20	16.25	5	19.5	6	15	0.75		0.003893	0.00462	11.7309	1
287	Clspn		0.249238	0.457835	0.54266	ACOS	32	21.33	29.33	16	22	32	0.75		0.003897	0.00462	11.7432	1
414	Helt		0.249271	0.457835	0.54266	NSPIKE	20	0	10	0	12	13.33	0.5		0.003893	0.00462	11.7309	1
652	Nexn		0.249452	0.457685	0.54266	NSPIKE	19	16.23	7.92	20.5	10	14.25	0.25		0.003871	0.004605	11.6638	1
126	Deup1		0.248636	0.461395	0.543651	SPIKE	22	3.67	14.67	4	16	5.5	0.5		0.003972	0.004686	11.969	1
254	Phf21b		0.248508	0.461395	0.543651	ACOS	19	17.42	6.33	22	8	19	0.58		0.003989	0.0047	12.0177	1
304	Per3		0.248939	0.461025	0.543651	NSPIKE	18	8.62	16.5	11.5	22	13.5	0.75		0.003935	0.004653	11.8551	1
386	Dennd1b		0.249119	0.461025	0.543651	ACOS	28	23.33	11.67	20	10	28	0.42		0.003912	0.004632	11.7875	1
896	Gmnc		0.248636	0.461395	0.543651	SPIKE	22	0	12.38	0	13.5	5.5	0.25		0.003972	0.004686	11.969	1
245	Oit1		0.247273	0.471485	0.549615	SPIKE	30	20	5	16	4	7.5	0.5		0.004147	0.004851	12.4953	1
282	Rnasel		0.246916	0.472195	0.549615	NSPIKE	29	16.31	0	13.5	0	21.75	0.75		0.004194	0.004884	12.6365	1
455	Gm29975		0.247273	0.471485	0.549615	SPIKE	35	32.08	14.58	22	10	5.83	0.5		0.004147	0.004851	12.4953	1
566	Klhl4		0.247076	0.472075	0.549615	NSPIKE	19	11.08	1.58	14	2	15.83	0.5		0.004173	0.004865	12.5733	1
729	Pus10		0.246358	0.473065	0.549615	NSPIKE	24	20	8	20	8	20	0.5		0.004268	0.004959	12.8604	1
773	Ipcef1		0.246674	0.473015	0.549615	SPIKE	32	8	24	6	18	10.67	0.5		0.004226	0.004916	12.7332	1
798	Trpc6		0.247842	0.469785	0.549615	NSPIKE	30	13.12	0	10.5	0	22.5	0.25		0.004073	0.004794	12.2734	1
846	Zcchc7		0.247246	0.471655	0.549615	ACOS	35	5.83	20.42	4	14	35	0.58		0.004151	0.004851	12.5061	1
859	Slc2a9		0.247634	0.469965	0.549615	SPIKE	20	1.67	10.42	2	12.5	5	0.75		0.0041	0.00482	12.3541	1
884	Fcer2a		0.247273	0.471485	0.549615	SPIKE	32	8	24	6	18	8	0.5		0.004147	0.004851	12.4953	1
990	Ehf		0.247273	0.471485	0.549615	SPIKE	18	4.5	13.5	6	18	3	0.5		0.004147	0.004851	12.4953	1
991	Stk33		0.247076	0.472075	0.549615	NSPIKE	19	7.92	17.42	10	22	15.83	0.5		0.004173	0.004865	12.5733	1
4	Prl		0.24526	0.483985	0.559705	SPIKE	35	29.17	13.85	20	9.5	8.75	0.25		0.004418	0.005121	13.3104	1
104	Runx2		0.244949	0.485115	0.559705	NSPIKE	19	11.48	3.17	14.5	4	14.25	0.25		0.004461	0.005147	13.4407	1
319	Zfp169		0.244949	0.485115	0.559705	NSPIKE	22	18.33	7.33	20	8	16.5	0.5		0.004461	0.005147	13.4407	1
411	Gucy1b2		0.245676	0.483575	0.559705	ACOS	30	27.5	2.5	22	2	30	0.83		0.004361	0.00506	13.1384	1
655	Tuba8		0.245116	0.484765	0.559705	SPIKE	23	1.92	14.85	2	15.5	5.75	0.25		0.004438	0.005138	13.3706	1
977	Nrros		0.244949	0.485115	0.559705	NSPIKE	18	1.5	10.5	2	14	12	0.5		0.004461	0.005147	13.4407	1
908	Mrvi1		0.244624	0.486885	0.561099	SPIKE	33	30.25	13.75	22	10	5.5	0.5		0.004506	0.005193	13.5779	1
974	C230057M02Rik		0.244022	0.491025	0.565217	NSPIKE	25	22.92	10.42	22	10	18.75	0.5		0.004592	0.005286	13.8353	1
99	Lhx6		0.243653	0.492275	0.565352	ACOS	28	4.67	4.67	4	4	28	0		0.004645	0.005334	13.9952	1
146	Gcnt1		0.243749	0.492015	0.565352	SPIKE	25	0	12.5	0	12	6.25	0.5		0.004631	0.005325	13.9534	1
167	Trp73		0.242714	0.500175	0.567244	NSPIKE	27	4.5	18	4	16	18	0.5		0.004782	0.005424	14.4094	1
220	Fam227a		0.242714	0.500175	0.567244	NSPIKE	24	20	8	20	8	20	0.5		0.004782	0.005424	14.4094	1
399	Espn		0.242765	0.500175	0.567244	NSPIKE	18	1.5	10.5	2	14	12	0.5		0.004775	0.005424	14.3869	1
483	Hcrtr1		0.243263	0.496475	0.567244	SPIKE	19	7.92	17.42	10	22	6.33	0.5		0.004702	0.005393	14.1658	1
493	Pde7a		0.242765	0.500175	0.567244	NSPIKE	19	11.48	3.17	14.5	4	14.25	0.25		0.004775	0.005424	14.3869	1
502	Iffo2		0.242779	0.500175	0.567244	ACOS	35	11.67	8.75	8	6	35	0.08		0.004773	0.005424	14.3803	1
538	Frmd7		0.242714	0.500175	0.567244	NSPIKE	18	0	9	0	12	15	0.5		0.004782	0.005424	14.4094	1
550	Kcnh3		0.242836	0.499935	0.567244	ACOS	35	14.58	11.67	10	8	35	0.08		0.004764	0.005424	14.355	1
636	Postn		0.242714	0.500175	0.567244	NSPIKE	24	12	0	12	0	20	0.5		0.004782	0.005424	14.4094	1
894	Tirap		0.242714	0.500175	0.567244	NSPIKE	24	12.5	2	12.5	2	18	0.25		0.004782	0.005424	14.4094	1
935	Zfp991		0.24316	0.496585	0.567244	SPIKE	28	25.67	11.67	22	10	9.33	0.5		0.004717	0.005404	14.2114	1
105	Prss36		0.241481	0.506385	0.572335	SPIKE	24	0	10.5	0	10.5	6	0.75		0.004969	0.005616	14.9702	1
845	Nod2		0.241481	0.506385	0.572335	SPIKE	31	0	13.56	0	10.5	7.75	0.75		0.004969	0.005616	14.9702	1
851	Tex15		0.241805	0.506295	0.572335	SPIKE	19	15.83	7.52	20	9.5	4.75	0.25		0.004919	0.005572	14.8209	1
168	Slc38a7		0.240728	0.511785	0.577131	SPIKE	18	4.5	12.38	6	16.5	4.5	0.75		0.005085	0.005735	15.3219	1
751	Rbm20		0.240832	0.511725	0.577131	NSPIKE	18	16.12	6	21.5	8	13.5	0.75		0.005069	0.005723	15.273	1
10	Osbp2		0.239408	0.520685	0.586263	SPIKE	20	13.33	4.58	16	5.5	5	0.25		0.005296	0.005964	15.9569	1
434	Dcaf17		0.239199	0.521645	0.586263	NSPIKE	25	22.92	10.42	22	10	20.83	0.5		0.00533	0.00599	16.0592	1
942	Npb		0.239378	0.521535	0.586263	SPIKE	35	32.08	14.58	22	10	5.83	0.5		0.005301	0.005964	15.9717	1
115	Abcc12		0.238195	0.529675	0.59395	SPIKE	19	7.92	16.23	10	20.5	4.75	0.75		0.005496	0.006163	16.5603	1
164	Tnfrsf25		0.238195	0.529675	0.59395	SPIKE	35	29.17	11.67	20	8	11.67	0.5		0.005496	0.006163	16.5603	1
368	Crybg2		0.237707	0.532135	0.59537	SPIKE	35	8.75	24.06	6	16.5	8.75	0.75		0.005579	0.006249	16.8091	1
733	Adamts9		0.237566	0.532135	0.59537	SPIKE	20	11.67	1.67	14	2	6.67	0.5		0.005603	0.006269	16.8817	1
224	Pcgf6		0.236767	0.536195	0.599241	SPIKE	18	1.5	11.62	2	15.5	4.5	0.25		0.005741	0.006416	17.2971	1
337	Ptpru		0.235907	0.544235	0.606867	NSPIKE	21	8.31	17.5	9.5	20	15.75	0.75		0.005893	0.006571	17.7547	1
778	Stk31		0.236248	0.544055	0.606867	ACOS	20	6.67	10	8	12	20	0.83		0.005832	0.00651	17.572	1
72	Catsperg1		0.234606	0.547405	0.609721	ACOS	18	13.5	13.5	18	18	18	0		0.006129	0.006827	18.4673	1
114	Cep152		0.23362	0.558434	0.621313	SPIKE	24	14	0.5	14	0.5	6	0.75		0.006314	0.007025	19.0245	1
213	Slc4a9		0.23338	0.559064	0.621321	SPIKE	20	5	16.25	6	19.5	5	0.25		0.00636	0.007068	19.162	1
111	Cfap100		0.232224	0.565334	0.626197	SPIKE	29	2.42	16.92	2	14	4.83	0.5		0.006584	0.007293	19.8378	1
235	Egfem1		0.23233	0.565334	0.626197	NSPIKE	19	11.08	1.58	14	2	15.83	0.5		0.006563	0.007278	19.7751	1
348	Gm30515		0.23233	0.565334	0.626197	NSPIKE	19	7.92	17.42	10	22	15.83	0.5		0.006563	0.007278	19.7751	1
237	Naip5		0.231226	0.570384	0.63109	NSPIKE	18	9	0	12	0	12	0.5		0.006784	0.007505	20.4387	1
233	Jade3		0.230578	0.575144	0.635652	SPIKE	32	0	16	0	12	5.33	0.5		0.006916	0.007643	20.8367	1
360	Cchcr1		0.229081	0.586684	0.646336	NSPIKE	24	12	0	12	0	20	0.5		0.00723	0.007973	21.7838	1
496	Ccdc125		0.228925	0.586754	0.646336	ACOS	35	0	29.17	0	20	35	0.17		0.007263	0.008001	21.8845	1
721	Gm33274		0.229354	0.585684	0.646336	NSPIKE	33	15.81	30.25	11.5	22	24.75	0.75		0.007172	0.007917	21.6083	1
17	Gm16867		0.228073	0.592134	0.650826	NSPIKE	18	8.62	16.5	11.5	22	13.5	0.75		0.007449	0.008189	22.4427	1
308	Prdm9		0.228063	0.592134	0.650826	SPIKE	28	4.67	16.92	4	14.5	7	0.75		0.007451	0.008189	22.4492	1
409	Abca17		0.226779	0.602724	0.661152	SPIKE	32	2.67	18.67	2	14	5.33	0.5		0.007738	0.008495	23.3141	1
962	Col14a1		0.226668	0.602854	0.661152	SPIKE	32	16	2	12	1.5	8	0.25		0.007763	0.008514	23.39	1
162	Itgb4		0.225902	0.606754	0.663472	SPIKE	20	16.67	7.92	20	9.5	5	0.25		0.007939	0.008698	23.9215	1
494	Dach2		0.225653	0.606804	0.663472	NSPIKE	18	7.12	15	9.5	20	13.5	0.75		0.007997	0.008751	24.096	1
921	Met		0.225412	0.606964	0.663472	SPIKE	30	0	13.12	0	10.5	7.5	0.75		0.008054	0.008804	24.2668	1
891	Epha10		0.22486	0.613744	0.670149	NSPIKE	32	24	8	18	6	24	0.5		0.008185	0.008937	24.6612	1
48	Eps8l1		0.221993	0.630054	0.685149	ACOS	33	19.25	13.75	14	10	33	0.17		0.008895	0.009681	26.8006	1
255	A330001L22Rik		0.22226	0.629654	0.685149	SPIKE	18	1.5	11.62	2	15.5	4.5	0.25		0.008827	0.009617	26.5948	1
422	Insc		0.222861	0.628634	0.685149	SPIKE	32	8	24	6	18	10.67	0.5		0.008675	0.009461	26.1366	1
900	Myl2		0.221404	0.630914	0.685149	NSPIKE	28	19.25	7	16.5	6	21	0.25		0.009047	0.009825	27.26	1
995	Gm5342		0.221672	0.630914	0.685149	ACOS	20	1.67	15	2	18	20	0.33		0.008978	0.00976	27.0497	1
970	Arhgap9		0.221313	0.632934	0.686595	NSPIKE	32	11.33	29.33	8.5	22	24	0.25		0.009071	0.00984	27.3311	1
656	Fam178b		0.220479	0.643814	0.696883	SPIKE	30	20	5	16	4	7.5	0.5		0.009291	0.010057	27.9947	1
848	Prr19		0.220479	0.643814	0.696883	SPIKE	30	10	23.12	8	18.5	7.5	0.75		0.009291	0.010057	27.9947	1
165	Kcnj15		0.218852	0.649954	0.702767	SPIKE	34	28.33	9.21	20	6.5	8.5	0.75		0.009735	0.010526	29.3301	1
143	Meis2		0.218111	0.655743	0.70826	NSPIKE	19	16.23	7.92	20.5	10	14.25	0.25		0.009942	0.010738	29.9559	1
967	Sytl2		0.217307	0.660793	0.712942	NSPIKE	34	28.33	11.33	20	8	28.33	0.5		0.010172	0.010975	30.6492	1
419	Primpol		0.217215	0.663033	0.714587	SPIKE	35	5.83	23.33	4	16	8.75	0.5		0.010199	0.010992	30.7291	1
470	Zfp944		0.21541	0.671063	0.722461	SPIKE	20	18.33	7.08	22	8.5	5	0.75		0.010733	0.011555	32.3388	1
251	Prr15l		0.214886	0.676393	0.723516	NSPIKE	20	3.33	13.33	4	16	15	0.5		0.010893	0.011652	32.8197	1
361	Tedc2		0.214886	0.676393	0.723516	NSPIKE	20	13.75	5	16.5	6	15	0.25		0.010893	0.011652	32.8197	1
518	Smtnl2		0.214886	0.676393	0.723516	NSPIKE	24	16	4	16	4	18	0.5		0.010893	0.011652	32.8197	1
608	BC055324		0.214886	0.676393	0.723516	NSPIKE	28	14	0	12	0	21	0.5		0.010893	0.011652	32.8197	1
611	Car12		0.214886	0.676393	0.723516	NSPIKE	24	20	8	20	8	20	0.5		0.010893	0.011652	32.8197	1
847	Il18		0.214886	0.676393	0.723516	NSPIKE	28	8.75	21	7.5	18	21	0.75		0.010893	0.011652	32.8197	1
132	Egf		0.21418	0.680803	0.726675	SPIKE	19	1.58	11.08	2	14	3.17	0.5		0.011111	0.01186	33.4777	1
177	Robo3		0.21418	0.680803	0.726675	SPIKE	20	18.33	7.08	22	8.5	5	0.75		0.011111	0.01186	33.4777	1
217	Ncapg2		0.213809	0.684293	0.728842	ACOS	18	9	3	12	4	18	0.33		0.011227	0.011958	33.8278	1
366	Trpm6		0.213809	0.684293	0.728842	ACOS	18	1.5	15	2	20	18	0.25		0.011227	0.011958	33.8278	1
228	9030025P20Rik		0.213201	0.686433	0.729564	SPIKE	34	28.33	11.33	20	8	5.67	0.5		0.01142	0.012138	34.4089	1
229	Gm3435		0.213201	0.686433	0.729564	SPIKE	34	28.33	11.33	20	8	5.67	0.5		0.01142	0.012138	34.4089	1
280	Art3		0.212814	0.687493	0.729913	SPIKE	20	5	16.25	6	19.5	5	0.25		0.011544	0.012257	34.7827	1
21	Sema6c		0.211909	0.690353	0.73217	ACOS	33	11	13.75	8	10	33	0.92		0.011839	0.012556	35.6718	1
75	Tbc1d4		0.211077	0.700843	0.739555	NSPIKE	18	3	12	4	16	13.5	0.5		0.012116	0.012836	36.5061	1
211	Lrmp		0.210042	0.702503	0.739555	NSPIKE	18	3	12	4	16	13.5	0.5		0.012469	0.013126	37.5679	1
240	Skor1		0.210779	0.702103	0.739555	ACOS	35	11.67	5.83	8	4	35	0.17		0.012217	0.012916	36.8095	1
326	Rhbdf1		0.210042	0.702503	0.739555	NSPIKE	18	9	0	12	0	12	0.5		0.012469	0.013126	37.5679	1
329	Cd72		0.210042	0.702503	0.739555	NSPIKE	21	16.19	7	18.5	8	15.75	0.25		0.012469	0.013126	37.5679	1
484	Fzd6		0.210825	0.702103	0.739555	NSPIKE	21	3.5	14	4	16	15.75	0.5		0.012201	0.012913	36.7621	1
789	Adamtsl5		0.210042	0.702503	0.739555	NSPIKE	18	9	0	12	0	12	0.5		0.012469	0.013126	37.5679	1
507	2210408F21Rik		0.208928	0.711233	0.747956	SPIKE	25	6.25	17.19	6	16.5	6.25	0.75		0.012858	0.013522	38.7408	1
161	Fgd2		0.208012	0.716363	0.751903	SPIKE	25	4.17	15.1	4	14.5	6.25	0.75		0.013186	0.013852	39.7279	1
903	Mndal		0.20788	0.716493	0.751903	SPIKE	32	29.33	13.33	22	10	5.33	0.5		0.013233	0.013887	39.8718	1
64	Ccdc158		0.207128	0.720143	0.75494	SPIKE	25	4.17	16.67	4	16	4.17	0.5		0.013509	0.014162	40.7023	1
683	Ano8		0.206307	0.725263	0.759509	SPIKE	30	15	28.12	12	22.5	7.5	0.75		0.013815	0.014467	41.6246	1
113	Pafah2		0.20498	0.731913	0.761678	NSPIKE	27	6.75	20.25	6	18	18	0.5		0.014323	0.014905	43.1542	1
203	Bnc2		0.20498	0.731913	0.761678	NSPIKE	35	8.75	26.25	6	18	23.33	0.5		0.014323	0.014905	43.1542	1
413	Sh2d4b		0.20498	0.731913	0.761678	NSPIKE	18	1.5	10.5	2	14	12	0.5		0.014323	0.014905	43.1542	1
536	Piezo1		0.20498	0.731913	0.761678	NSPIKE	18	1.5	10.5	2	14	12	0.5		0.014323	0.014905	43.1542	1
645	Irgm1		0.20543	0.731873	0.761678	NSPIKE	18	16.5	7.5	22	10	13.5	0.5		0.014149	0.014801	42.6299	1
678	Sctr		0.20498	0.731913	0.761678	NSPIKE	18	7.5	16.5	10	22	12	0.5		0.014323	0.014905	43.1542	1
632	Itk		0.204416	0.738183	0.767402	SPIKE	21	1.75	12.25	2	14	7	0.5		0.014543	0.015119	43.8194	1
157	Lhx9		0.201948	0.752092	0.780237	SPIKE	35	0	19.69	0	13.5	8.75	0.25		0.015543	0.016132	46.8313	1
857	Racgap1		0.201931	0.752092	0.780237	ACOS	29	2.42	2.42	2	2	29	0		0.01555	0.016132	46.8535	1
804	Gm20655		0.201581	0.753932	0.781321	SPIKE	27	18	6.19	16	5.5	6.75	0.25		0.015697	0.016267	47.2947	1
883	Polm		0.201083	0.754702	0.781321	SPIKE	34	28.33	13.46	20	9.5	8.5	0.25		0.015907	0.016468	47.929	1
548	Nlrp3		0.2	0.760712	0.785912	NSPIKE	28	14	0	12	0	21	0.5		0.016374	0.016916	49.3339	1
703	Acr		0.2	0.760712	0.785912	NSPIKE	27	4.5	18	4	16	18	0.5		0.016374	0.016916	49.3339	1
459	Arhgap45		0.197066	0.774942	0.799785	NSPIKE	28	19.25	7	16.5	6	21	0.25		0.017696	0.018263	53.3183	1
468	Endou		0.196348	0.777012	0.801093	SPIKE	19	3.17	11.48	4	14.5	4.75	0.75		0.018033	0.018592	54.334	1
389	Ttn		0.195842	0.781902	0.805303	SPIKE	22	5.5	15.12	6	16.5	5.5	0.75		0.018274	0.018821	55.0597	1
403	Nfkbid		0.192417	0.799222	0.821445	SPIKE	30	15	28.12	12	22.5	7.5	0.75		0.019978	0.020533	60.1929	1
826	Saa3		0.192417	0.799222	0.821445	SPIKE	27	18	4.5	16	4	9	0.5		0.019978	0.020533	60.1929	1
988	Myh7b		0.191995	0.802092	0.823547	SPIKE	19	14.25	3.56	18	4.5	4.75	0.75		0.020197	0.020737	60.8523	1
698	Ulk4		0.190807	0.807122	0.82786	SPIKE	24	12	0	12	0	8	0.5		0.020824	0.021359	62.7428	1
749	Spats1		0.18621	0.830222	0.850679	SPIKE	28	21	8.75	18	7.5	7	0.25		0.023409	0.023986	70.5311	1
3	Shox2		0.184245	0.838002	0.854265	NSPIKE	24	12.5	2	12.5	2	18	0.25		0.024593	0.025071	74.0997	1
219	S100a3		0.184245	0.838002	0.854265	NSPIKE	27	4.5	18	4	16	18	0.5		0.024593	0.025071	74.0997	1
370	Foxa1		0.184245	0.838002	0.854265	NSPIKE	32	16	0	12	0	26.67	0.5		0.024593	0.025071	74.0997	1
590	1700125H20Rik		0.184245	0.838002	0.854265	NSPIKE	30	28.12	15	22.5	12	22.5	0.25		0.024593	0.025071	74.0997	1
781	Prss38		0.184245	0.838002	0.854265	NSPIKE	28	0	14	0	12	18.67	0.5		0.024593	0.025071	74.0997	1
710	Vill		0.183532	0.842202	0.857671	SPIKE	18	4.5	12.38	6	16.5	4.5	0.75		0.025035	0.025495	75.4316	1
372	Esrrg		0.180128	0.855231	0.870052	NSPIKE	19	5.15	15.83	6.5	20	14.25	0.25		0.027239	0.027711	82.0716	1
726	Chrna10		0.179583	0.857881	0.871859	SPIKE	18	4.5	13.5	6	18	3	0.5		0.027607	0.028056	83.1786	1
324	Catsperd		0.177998	0.861491	0.873748	NSPIKE	33	28.19	13.75	20.5	10	24.75	0.25		0.028699	0.029107	86.4689	1
527	C1qtnf1		0.177998	0.861491	0.873748	NSPIKE	33	28.19	13.75	20.5	10	24.75	0.25		0.028699	0.029107	86.4689	1
393	Gm27162		0.177249	0.867491	0.87894	ACOS	32	2.67	29.33	2	22	32	0.17		0.029227	0.029613	88.061	1
542	Chrd		0.175378	0.870681	0.881278	SPIKE	30	15	28.12	12	22.5	7.5	0.75		0.030582	0.030954	92.1438	1
756	Bean1		0.172296	0.884401	0.894258	SPIKE	29	12.08	24.77	10	20.5	7.25	0.75		0.032928	0.033295	99.213	1
160	Kcnmb2		0.169463	0.893631	0.899801	SPIKE	20	0	8.75	0	10.5	5	0.75		0.035213	0.035462	106.098	1
740	Zranb3		0.170437	0.892141	0.899801	SPIKE	32	8	24	6	18	8	0.5		0.034414	0.034762	103.688	1
767	Ccdc60		0.16981	0.892601	0.899801	NSPIKE	19	11.08	1.58	14	2	15.83	0.5		0.034927	0.035209	105.234	1
801	Arhgap8		0.169842	0.892601	0.899801	NSPIKE	27	17.44	2.25	15.5	2	20.25	0.75		0.0349	0.035209	105.155	1
837	Zfp934		0.169251	0.894391	0.899801	NSPIKE	19	7.92	17.42	10	22	15.83	0.5		0.035389	0.035603	106.628	1
983	Otx2		0.161059	0.920351	0.924985	SPIKE	26	4.33	17.33	4	16	4.33	0.5		0.042767	0.042983	128.858	1
474	Gm6773		0.157135	0.930371	0.934115	SPIKE	32	2.67	18.67	2	14	5.33	0.5		0.046718	0.046906	140.761	1
61	Tpcn2		0.151523	0.944141	0.946987	NSPIKE	35	5.83	23.33	4	16	29.17	0.5		0.052871	0.05303	159.3	1
247	Hcrt		0.140821	0.96363	0.965565	SPIKE	32	24	8	18	6	8	0.5		0.06637	0.066504	199.974	1
436	Crocc2		0.132288	0.97488	0.97488	NSPIKE	34	28.33	11.33	20	8	28.33	0.5		0.078934	0.078934	237.827	1
478	Zcwpw1		0.132288	0.97488	0.97488	NSPIKE	23	0	11.5	0	12	19.17	0.5		0.078934	0.078934	237.827	1
