# Supplementary material for: Hypothalamic deiodinase type-3 establishes the period of circannual interval timing in mammals
Source: bioRxiv preprint, doi:10.1101/2025.04.22.650143, version 3 (2025-09-12)
Supplement: Dataset S2 [file 650143_file07.xlsx]

## Sheet: EdgeR
	logFC.Group12wk	logFC.Group16wk	logFC.Group20wk	logFC.Group24wk	logFC.Group28wk	logFC.Group32wk	logFC.Group4wk	logFC.Group8wk	logCPM	F	PValue	FDR
Prl	-4.57057	-3.85388	-3.31337	-1.10715	-0.294335	-0.180931	-2.5186	-4.91239	12.3115	46.7954	1.06632e-27	2.357e-23
Arhgdib	-1.16586	-1.16586	5.52779	0.0122859	-1.16586	-1.16586	-1.16586	-1.16586	5.09266	13.4383	1.96047e-10	2.16671e-06
S100a9	0	0	7.98264	0	0	0	0	0	5.77688	14.467	4.93559e-10	3.54244e-06
Abi3bp	1.82941	6.71891	0	1.17845	2.01333	0.988789	0	0	5.12412	11.4881	6.4105e-10	3.54244e-06
Npas3	0.381849	3.53769	-0.897124	-0.735499	-0.675994	-1.88099	4.5017	-1.91373	5.23001	9.44487	4.78104e-09	2.1136e-05
Anks1b	0	0.941015	6.62727	0	1.35349	0	1.35031	0	4.93848	9.91641	1.34926e-08	4.97067e-05
Tns1	-1.14615	2.33468	-4.0994	-3.86321	-5.157	-3.08803	-3.67697	-3.95036	5.63906	8.5111	2.88296e-08	9.10356e-05
Elavl2	-0.765789	4.85829	4.52336	6.35799	5.69525	-0.753235	2.37537	-0.78149	6.92469	8.17	4.24362e-08	0.000108227
Septin4	-0.450265	-1.59629	-0.278567	0.515394	-1.59629	4.4193	-1.59629	0.81772	4.89539	8.64676	4.52225e-08	0.000108227
Cit	1.4337	0.952309	3.29913	2.02364	0	6.35183	0	0	5.00228	8.83517	4.89626e-08	0.000108227
Adgrl3	-1.92477	1.81468	-1.92477	-0.0633546	-1.92477	4.90668	3.83845	5.89608	6.18998	8.44729	6.52347e-08	0.00012455
Macrod2	0	5.75386	5.2634	0	0	1.07684	0	1.19829	4.9961	8.92041	6.76166e-08	0.00012455
Unc79	3.5809	2.95659	-2.54442	-2.40945	0.506582	-0.672173	-1.83425	-2.63752	5.98523	7.87264	7.83547e-08	0.000130255
Dock10	4.02916	-2.05923	4.24856	-0.766678	0.795655	-1.06865	-2.05923	-2.05923	5.30774	8.32046	8.24995e-08	0.000130255
Apbb2	-1.00719	-3.24952	-3.48041	2.86687	-0.623147	-3.2695	-3.14637	-2.8936	5.55502	7.71459	1.08894e-07	0.000160467
Ikzf4	0.0841266	-1.1644	-0.11195	4.11595	4.44982	-0.0876297	-1.1644	-1.1644	4.98163	8.08249	1.28671e-07	0.000177759
Fam135a	5.23959	0.945401	-1.17221	4.09789	5.0532	0.11592	-1.17221	-1.17221	5.52477	7.99189	1.52604e-07	0.000189721
Cacna1g	-6.05574	-4.83403	-6.05574	-4.03569	-6.05574	-4.75859	-3.39096	-4.85912	4.88257	7.9832	1.55126e-07	0.000189721
Ccdc106	-1.39697	-0.175385	-0.383254	2.28379	-0.268706	-0.169875	4.56259	0.0499578	4.89023	7.62631	1.69637e-07	0.000189721
Stx3	-2.56266	-1.30162	-1.007	-0.586194	3.74923	0.0132789	-1.21122	-2.56266	4.98113	7.76278	1.71662e-07	0.000189721
Csnk1g1	4.26944	4.25368	3.91312	-1.39663	-1.39663	-0.401679	5.18599	-1.39663	5.6497	7.81708	2.12533e-07	0.000223706
Invs	0.429685	0.0691397	-1.39705	-1.39705	-1.39705	-0.322995	-1.39705	4.21373	4.72358	7.93653	2.42927e-07	0.000243266
Fam228b	5.84263	1.82407	0	0	0	1.2385	0	0	4.7878	8.41351	2.56368e-07	0.000243266
Pan2	4.85986	3.14009	4.49352	-1.92319	-1.92319	-0.0130151	4.51659	0.263849	5.95849	7.52071	2.77402e-07	0.000243266
Pgap2	0	1.25946	0	1.9344	2.15807	5.22973	6.7398	0	5.25405	7.8472	2.86009e-07	0.000243266
Neb	5.48709	0.951599	1.01447	2.03471	5.69282	1.0765	2.11111	1.32574	5.08115	7.3718	2.86143e-07	0.000243266
Map4k4	4.19	5.21373	4.71659	0.543917	-1.48441	6.08659	0.608311	5.83205	6.59914	7.17403	4.31322e-07	0.000330828
Aak1	-3.23111	-2.21036	4.28229	3.30685	4.2159	2.303	2.05631	1.16119	7.54754	7.06081	4.35044e-07	0.000330828
Snapc4	-4.83919	-4.61384	-6.08765	-4.58872	-4.76392	-5.09962	-1.18569	-6.08765	5.03583	7.27193	4.56853e-07	0.000330828
Eml4	-2.08246	-1.13005	-0.764934	2.11938	-2.08246	4.20088	-2.08246	-0.636308	5.01385	7.41757	4.57995e-07	0.000330828
Ptpru	0	2.12337	0	5.73827	0.868795	1.26791	0	0	4.75438	7.79452	4.63973e-07	0.000330828
Fiz1	1.24875	0.950459	5.92953	3.03211	2.13904	0	1.32906	0	4.83685	7.38491	4.87988e-07	0.000337078
Erc2	-1.16541	-1.16541	0.151652	0.125956	4.12343	4.61627	0.186462	0.298157	5.0552	7.16939	5.621e-07	0.000376504
Pts	4.33847	-0.506458	-0.443977	-0.167079	2.08872	0.42793	-0.106748	-1.4573	4.86436	6.99452	6.27938e-07	0.000408233
Vrk1	0.769336	2.39822	-2.73607	-3.75178	-3.75178	-3.75178	-2.25011	-3.75178	5.06663	7.36576	6.98469e-07	0.00042709
Zbtb7b	6.17589	0	0	2.44574	3.98151	2.90492	1.48427	1.46398	4.99387	7.20049	6.99497e-07	0.00042709
Zfp287	1.14325	0.937173	1.32285	0	0.867036	5.69681	0	1.19155	4.72078	7.18132	7.2631e-07	0.00042709
Mecr	-5.52332	-3.69563	-0.310886	-4.23272	-5.52332	-5.52332	-4.17233	-5.52332	4.91565	7.33919	7.3423e-07	0.00042709
Ciz1	5.84222	1.25638	1.31304	1.2925	2.01981	5.86295	0	4.78622	5.29593	7.02214	7.58354e-07	0.000429811
Carmil3	0	0	5.37024	0	0	0.980267	1.47305	0	4.65862	7.70917	8.2366e-07	0.000455155
Tbrg4	3.44876	3.20305	0.116565	-0.560982	-2.05996	-0.982935	-2.05996	1.29455	5.03191	6.96378	8.54398e-07	0.000460625
Pou2f2	-1.56827	-0.0944435	-0.515362	-1.56827	-1.56827	4.40448	0.581454	3.49848	5.03691	7.08273	8.81826e-07	0.000464092
Cep295	-0.261783	-1.24398	-2.18524	-0.73474	2.24408	-2.18524	3.55126	-2.18524	4.90322	7.05919	9.23772e-07	0.000474862
Zbtb37	-5.25642	-5.25642	-5.25642	-4.08084	-5.25642	-1.40521	-3.90489	0.221759	4.99529	7.15898	1.03199e-06	0.000512678
Ptprs	0.10155	-5.47711	-5.47711	1.37838	-1.95783	-5.47711	-3.34735	-5.47711	5.58585	7.15302	1.04373e-06	0.000512678
Csf3r	0	0	5.39498	0	0	0	0	1.32229	4.65505	7.83238	1.08585e-06	0.000521776
Rnmt	-0.0552837	-0.783385	2.0665	1.26644	1.05434	-0.974164	-1.96272	4.38183	5.09442	6.7232	1.11411e-06	0.000523963
Anks3	-3.70973	-1.22339	-4.13658	-5.94133	-5.06637	-4.71513	-4.45712	-4.61589	5.00468	6.70869	1.14903e-06	0.000529127
Fgf13	2.42843	-3.52052	-3.52052	-2.22964	-2.16653	-1.77163	0.408415	-3.52052	4.96001	6.93228	1.18785e-06	0.000535842
Greb1	-0.430739	-1.57252	-1.57252	4.12839	2.02977	0.213227	-1.57252	-1.57252	4.83204	7.06462	1.23492e-06	0.000545935
Zfp62	1.83674	5.47235	5.13029	0	0	0	0	0	4.90178	7.4157	1.35829e-06	0.0005887
Sbno2	-1.39706	-0.211037	-1.39706	-0.229384	-1.39706	-1.39706	-1.39706	3.9132	4.63306	7.18163	1.39166e-06	0.000591562
Foxred1	3.36308	4.09467	-1.45707	-1.45707	-1.45707	-1.45707	-1.45707	-1.45707	4.89386	7.35295	1.51329e-06	0.000627778
Mapk15	0	1.47135	5.72564	1.2903	3.13542	0	0	3.71908	4.87425	6.95135	1.53366e-06	0.000627778
Lmo7	3.69065	-0.547049	0.345811	-1.49787	3.61075	5.6674	-1.49787	4.42478	5.82861	6.65532	1.61337e-06	0.000636486
Adgrl2	-3.32935	-3.63589	-3.56315	-3.28695	-4.57788	-4.57788	-0.943782	1.16796	4.96925	6.65491	1.61476e-06	0.000636486
Rnft2	-0.0122038	-1.1545	-1.1545	-1.1545	4.39457	-0.174185	-1.1545	-1.1545	4.66057	7.08772	1.65212e-06	0.000636486
Pms2	4.35006	0.0130747	4.61037	2.61062	-1.16612	-1.16612	-1.16612	-1.16612	5.11584	6.89262	1.71685e-06	0.000636486
Zdhhc21	1.34307	0	4.7539	0	0	0	1.4718	5.0311	4.779	7.06589	1.71957e-06	0.000636486
Tut7	-0.148451	0.0766897	2.82789	4.35068	3.17802	-1.39693	-0.0452441	-1.39693	5.02032	6.61633	1.74951e-06	0.000636486
Ankrd24	1.24927	0	0	0	5.26299	0	1.50644	2.08132	4.67487	7.05431	1.7565e-06	0.000636486
Cacna1b	0	6.15244	1.02464	0	5.99293	1.28279	5.14802	6.84936	5.81635	6.72577	1.7943e-06	0.000639696
Mettl15	1.14176	0.945439	5.40021	0	0	0	0	0	4.62686	7.21887	1.90883e-06	0.000669727
Akap7	1.1429	4.29937	0	5.85998	3.81653	1.07661	1.35127	0	4.95413	6.67832	1.97383e-06	0.000681711
Cacnb2	-2.29677	-2.87946	-4.41216	-5.42845	-2.62205	0.504576	-5.42845	-4.10253	5.13437	6.54424	2.03293e-06	0.000688214
Iqsec1	-5.58164	-2.46461	0.515777	-2.53971	-4.7033	-5.58164	-1.76837	-5.58164	5.26357	6.65832	2.05493e-06	0.000688214
Ecsit	1.14736	1.21901	2.36442	3.50162	6.06533	4.68717	0	2.1942	5.09953	6.49764	2.24072e-06	0.000739236
Cfap61	1.14231	0	1.32457	1.5083	5.40034	0	1.32535	0	4.66184	6.74469	2.28467e-06	0.000742652
Catspere2	5.33269	0	0	0	0	0	0	0	4.6112	7.6797	2.35456e-06	0.000754278
Tjap1	-4.43929	-2.61679	-5.58469	-4.41024	-1.87224	-4.59931	-5.58469	-4.38903	4.83179	6.46614	2.3934e-06	0.000755769
Cbfa2t3	-5.43131	-4.20502	-5.43131	-1.6963	-5.43131	-5.43131	-4.10464	-5.43131	4.72759	6.87405	2.44908e-06	0.000761644
Sema6d	1.99485	1.73582	5.72718	0	0	1.97934	1.48718	2.0814	4.8326	6.5645	2.48337e-06	0.000761644
Dock9	6.35675	1.48377	0	5.52064	5.68926	0	2.01182	6.4007	5.76331	6.55817	2.51538e-06	0.000761644
Igdcc4	-1.15995	4.35355	0.302111	0.0131813	2.65029	-1.15995	-1.15995	0.0343919	4.78679	6.5351	2.63572e-06	0.000778805
Ccdc15	-2.96754	-6.81995	-6.81995	-5.32687	-3.30843	-5.53129	-2.67461	-1.79589	5.42903	6.4189	2.64252e-06	0.000778805
Ccnj	1.14193	0	5.00482	1.51686	2.73208	0	5.15008	0	4.84608	6.65335	2.72845e-06	0.000793548
Mitf	-0.942306	3.84687	-2.19089	-2.19089	-0.837387	-2.19089	1.9133	-2.19089	4.939	6.59711	3.04487e-06	0.000863104
Dus1l	-0.936411	3.39521	-2.18499	-2.18499	-0.848717	-2.18499	-2.18499	2.91849	4.94159	6.59697	3.0457e-06	0.000863104
Khnyn	5.49234	0	1.57754	1.17069	3.19526	0	0	1.44906	4.72813	6.57773	3.16241e-06	0.000866776
Sema4a	0	0.94685	4.58194	0	0	0.981132	0	4.76982	4.69946	6.73482	3.1731e-06	0.000866776
Nrxn3	0	5.13427	0	0	1.33848	0.979378	1.32382	0	4.62464	6.73428	3.1763e-06	0.000866776
Grip1	2.0468	-0.918282	-2.39241	3.14948	-1.26411	-0.464034	2.69904	-2.39241	5.06282	6.31316	3.30067e-06	0.000889733
Col25a1	0	2.99373	0	0	0	0	0	5.82224	4.7564	7.13249	3.38578e-06	0.000901677
Nars2	0	0.943314	1.31486	5.47872	0	0	4.48232	5.26591	5.04232	6.47411	3.87493e-06	0.00101966
Gramd1b	-3.60984	0.427904	-7.05668	-2.46686	-1.3076	-7.05668	-5.59364	0.287187	6.54562	6.22135	4.00731e-06	0.00104209
Zfp2	-4.75601	0.725492	-3.43678	-4.75601	-3.88292	-3.03147	-4.75601	-3.29117	4.89149	6.31231	4.14962e-06	0.00106655
Carf	0	0.933729	0	0	0	0	1.3459	5.02175	4.55931	6.76593	4.23903e-06	0.00107245
Gas7	3.58807	0	3.22031	0	5.02268	0	1.33058	5.43989	4.99164	6.42484	4.26962e-06	0.00107245
4933427D14Rik	-5.60508	-4.12726	-1.59647	-1.46304	-3.88099	-4.5265	-4.10519	0.877604	5.36576	6.06789	4.57756e-06	0.00113688
Syt10	-5.02107	-5.02107	-5.02107	-2.70069	-0.457242	-2.93683	-5.02107	-5.02107	4.77476	6.51553	4.7906e-06	0.00117657
Dnah9	0	0.948885	3.84913	5.52153	0.868864	1.24046	0	0	4.74372	6.35085	4.94134e-06	0.00119258
Nrg1	-4.83207	-1.89004	-4.37021	-6.17174	-4.44029	-6.17174	-3.41941	-6.17174	5.00486	6.21686	5.04787e-06	0.00119258
Epha7	4.86033	0	1.57224	0	0	1.58085	0	1.87148	4.57138	6.48543	5.07121e-06	0.00119258
Mgat4a	3.08744	-2.40437	4.19839	-2.40437	1.79585	2.80496	-2.40437	-0.795829	5.52164	6.21103	5.10878e-06	0.00119258
Acnat1	-5.10277	-5.10277	0.0358232	-5.10277	-4.23201	-4.02741	-5.10277	-5.10277	4.79884	6.47699	5.15291e-06	0.00119258
Tnfaip8	0	0	3.0296	0	1.3496	0	0	5.21414	4.63594	6.65167	5.20141e-06	0.00119258
Mzf1	-2.04491	-0.837462	-1.84674	-3.18549	-3.18549	2.32993	-3.18549	-1.99204	4.76357	6.19932	5.23347e-06	0.00119258
Jakmip3	-5.41024	-5.41024	-5.41024	-1.76466	-4.53957	-5.41024	-3.86329	-1.43631	4.79652	6.30656	5.39452e-06	0.00121674
1110017D15Rik	0	0	5.66652	0	0	1.07402	0	3.61191	4.72188	6.60347	5.6726e-06	0.00126654
Pde4a	0	0	0	5.48175	2.70311	0	1.5509	1.19021	4.67931	6.41241	5.82454e-06	0.00128746
Dcp1b	-1.1602	4.54029	-1.1602	0.0131442	1.66372	-1.1602	0.925137	1.53618	4.79256	6.12539	6.09584e-06	0.00133408
Ets1	-0.010265	-1.151	3.31918	-1.151	-0.289492	-1.151	-1.151	0.0357557	4.49225	6.22122	6.39167e-06	0.00138237
Camta2	1.99061	-0.324788	-0.51302	3.26967	-0.349887	-3.29716	1.28293	-4.54386	6.26538	5.9122	6.44157e-06	0.00138237
Supt20	0	4.84679	0	1.29163	4.33491	6.04079	1.47021	0	5.11595	6.1989	6.68236e-06	0.00142026
Trmt5	1.24958	0	4.7715	0	0	0	0	0	4.50897	6.70772	6.91609e-06	0.00145594
Ppip5k1	0.0260682	-1.33902	-4.76775	-6.3946	0.33187	-6.3946	-6.3946	-3.66908	5.92191	6.05785	7.01052e-06	0.00146111
Ankrd6	-1.39706	-0.453025	-1.39706	-1.39706	3.47101	-0.419296	-1.39706	-1.39706	4.54457	6.31052	7.07288e-06	0.00146111
Ccdc77	0	4.56563	0	0	1.84624	0	0	0	4.50646	6.68405	7.2008e-06	0.00147376
Mid1	5.62996	0	0	3.54024	0	0	0	0	4.73987	6.67564	7.30493e-06	0.00148136
Asxl3	-1.15539	-0.208684	0.18667	-1.15539	4.25068	1.32886	-1.15539	-1.15539	4.69041	6.1277	7.70392e-06	0.00154807
Fhl1	1.24854	1.18028	3.07696	1.29091	3.03077	6.08792	2.97328	0	4.96601	5.89621	8.01738e-06	0.00159654
Fam184a	0.0111938	3.17306	-0.71916	0.716817	0.594181	4.0514	4.44683	-1.738	5.38379	5.80512	8.1582e-06	0.00160677
Otud7b	0.0827298	0.0137521	4.6366	-1.16569	3.77812	0.0970586	-1.16569	3.31811	5.07746	5.88493	8.21415e-06	0.00160677
Mybpc1	1.14154	0	0	0	5.12836	0	2.11272	1.46969	4.61484	6.20177	8.7122e-06	0.00168925
Epb41l3	5.73418	5.45749	0	5.52826	3.29159	0.99052	1.33269	0	5.30023	5.94691	8.82924e-06	0.00169706
Bdnf	1.90932	0.93536	0	1.16792	0.864266	5.17376	2.08404	0	4.64088	5.94041	8.94956e-06	0.00170535
Map3k11	1.3432	0	3.15963	3.9088	5.26815	0	1.3279	0	4.77463	6.04557	9.08334e-06	0.00171605
Zfp384	5.31925	6.12888	1.05962	1.4887	4.40926	6.67187	2.11386	4.75226	5.75364	5.75109	9.19487e-06	0.0017224
Grk6	2.44602	0	4.78274	1.1659	0	0	1.32372	0	4.566	6.15907	9.45858e-06	0.00175691
Cadm2	1.14272	0	3.58508	1.16931	5.1421	0	1.55061	1.19054	4.69302	5.90981	9.53976e-06	0.00175722
Gmeb1	0.748024	0.30906	-0.147986	0.905844	2.94276	-1.15822	4.07261	-1.15822	4.76476	5.7975	9.91614e-06	0.00181146
Fut8	-0.263731	0.929937	0.939326	-4.69073	-4.69073	-1.02484	-4.69073	-1.31295	5.35542	5.87632	1.02313e-05	0.00185008
Pdxdc1	4.60317	2.65185	2.34454	-1.16362	-1.16362	1.39356	-1.16362	1.01346	4.93382	5.87335	1.0295e-05	0.00185008
Ikzf1	1.13687	0	4.62095	0	0	0	0	0	4.49601	6.46249	1.05363e-05	0.0018701
St7	-5.61184	-5.61184	-1.55438	-4.43679	-2.96232	-3.89604	-4.26131	-3.18289	4.86197	5.76318	1.0679e-05	0.0018701
Dnm1	1.46365	4.34964	0.347701	1.85877	-0.584501	-1.45723	-0.127734	0.00779663	4.87356	5.6825	1.07067e-05	0.0018701
Tmem116	2.70509	0.946631	0	0	1.6728	0	0	5.60527	4.68609	6.09143	1.0778e-05	0.0018701
Sox6	-1.13196	-2.56066	-1.54294	-0.71247	2.44824	3.10166	-1.22896	3.18827	5.27636	5.67737	1.08294e-05	0.0018701
Lrsam1	-0.742104	0.272793	-0.427055	3.51808	-0.876641	-0.930571	-2.00479	-0.812717	4.73164	5.66209	1.12037e-05	0.00190974
Pou6f1	0	0.945254	0	2.1282	5.10264	1.07267	1.4881	1.32188	4.61929	5.83174	1.12322e-05	0.00190974
Pus10	3.51171	-1.5969	-1.5969	-1.5969	0.551126	3.58486	-0.26741	-1.5969	4.87342	5.93643	1.13181e-05	0.00190974
Pitrm1	2.87289	-0.251006	-2.08708	-2.08708	-2.08708	-0.815165	-2.08708	-0.617402	4.61545	5.93118	1.14391e-05	0.00191552
Fam161a	-1.15964	-1.15964	3.82841	-1.15964	-1.15964	1.22869	0.168381	3.50582	4.77975	5.91419	1.18388e-05	0.00196423
Atxn7	-2.23653	0.562039	-2.5226	-3.5757	1.49033	-2.58742	-3.5757	1.89795	5.06276	5.71285	1.19076e-05	0.00196423
Kcnt2	0	0	1.8056	0	1.69158	1.07267	5.26669	0	4.61981	6.03103	1.21158e-05	0.00196936
Espn	-1.16535	4.65739	1.29003	2.71024	-1.16535	2.07354	0.16565	3.39837	5.04995	5.70481	1.21169e-05	0.00196936
A630039O03Rik	0	0	0	1.51609	0	1.07266	4.8726	0	4.54441	6.1819	1.22381e-05	0.00197453
Stk33	4.39553	2.10802	-0.138446	-1.45662	1.85309	0.551966	0.784524	-1.45662	4.96179	5.69039	1.25016e-05	0.00200243
Sfswap	4.50866	4.37136	1.31692	1.50007	5.34591	0	1.35123	0	4.94835	5.77598	1.26267e-05	0.00200616
Zbtb21	3.18917	0.336022	-3.58057	-1.13877	1.30618	-2.5898	-2.09775	-2.11875	5.33086	5.60557	1.27064e-05	0.00200616
St3gal6	-1.60915	3.65619	-1.60915	-1.60915	-1.60915	-0.536308	-0.0570426	-1.60915	4.63128	6.00141	1.28331e-05	0.0020118
Pex2	-1.15152	0.123925	-1.15152	3.9311	-1.15152	-0.173362	-1.15152	-1.15152	4.56944	5.98806	1.31706e-05	0.00203899
Hfm1	1.26366	0	0	0	0	0	4.73122	0	4.5054	6.33149	1.32281e-05	0.00203899
Sfxn3	-0.330644	-0.352061	-0.254281	-1.5799	-0.334263	3.74894	-1.5799	-0.38965	4.68103	5.65891	1.33851e-05	0.00203899
Sfi1	2.70071	1.72601	5.17233	1.61362	-1.39684	2.53034	1.70689	-1.39684	5.30522	5.65106	1.36153e-05	0.00203899
Agrn	4.69221	0	1.6015	1.16544	0	0	0	0	4.51926	6.12013	1.37194e-05	0.00203899
Dock4	-0.624952	-0.704983	-1.96317	-0.784102	3.63623	2.48438	3.59348	0.459803	5.17365	5.57053	1.37396e-05	0.00203899
Cux2	-2.997	-2.997	3.87074	2.83601	2.81522	-2.997	-0.146892	1.97897	5.75349	5.73545	1.37503e-05	0.00203899
Rgs3	0	0	1.04737	1.51171	0.866163	3.2995	5.22813	2.45447	4.70463	5.72983	1.39141e-05	0.00203899
Epb41l2	0	6.23846	4.99485	0	5.80986	5.05211	1.53822	0	5.52378	5.83264	1.39675e-05	0.00203899
Stxbp5l	-3.38823	-2.25652	-2.01321	-1.66883	-1.36148	-2.6938	-1.54997	1.72249	5.76683	5.49564	1.40141e-05	0.00203899
Synj1	0	6.17431	0	7.78665	6.64625	5.98493	2.09042	4.68899	6.37651	5.72618	1.40213e-05	0.00203899
Sorbs1	4.84068	0.50602	0.0992157	4.83506	4.24495	3.66617	7.08103	3.78061	6.49124	5.48174	1.4467e-05	0.00209005
Tmem255b	1.14076	0.933591	0	0	0	2.11738	1.34581	4.7722	4.55106	5.80111	1.48922e-05	0.00213752
Cpt1c	5.65649	4.01995	1.81795	6.04411	0.878587	4.02519	0	1.46209	5.28416	5.60492	1.5052e-05	0.00213888
Mgam	0	0.944913	1.57323	1.28615	0	5.19605	0	2.28772	4.63252	5.79446	1.50952e-05	0.00213888
Ppargc1a	0.600512	0.300507	-1.39703	1.63773	-1.39703	-1.39703	0.0749651	4.15764	4.76167	5.68735	1.52176e-05	0.00214248
Mapkap1	-5.4782	-4.2574	-1.48556	-5.4782	-5.4782	-4.21408	-4.14802	-0.633759	4.94247	5.66964	1.57974e-05	0.00221004
Myo9b	0	0	3.92681	4.53708	0	0	5.12293	0	4.82673	6.03812	1.59769e-05	0.0022211
Cntn6	0	4.81288	0	0	0	0	0	0	4.52899	6.44851	1.62917e-05	0.0022507
Cobll1	0.579795	3.92421	-1.16041	0.129129	0.530705	0.55508	3.32152	-1.16041	4.79773	5.56418	1.64487e-05	0.00225828
Igsf9	-5.25031	-1.3759	-4.24091	-5.25031	-5.25031	-4.17624	-3.01786	-5.25031	4.72451	5.74821	1.65871e-05	0.00226322
Kank1	-4.17609	-1.31297	-4.17609	2.25541	-2.42681	1.11604	-1.92204	-1.26941	5.31749	5.54739	1.70625e-05	0.0023138
Serinc2	-1.15311	1.8341	3.86906	-1.15311	0.143373	-1.15311	-1.15311	-1.15311	4.62238	5.83584	1.77306e-05	0.00237637
Fmnl1	1.99947	0	4.51411	1.50675	0.866686	0	0	4.73049	4.71466	5.71534	1.77389e-05	0.00237637
Trim46	1.26139	4.51941	5.56701	1.17788	5.00358	1.95294	0	1.19907	5.06568	5.52462	1.7932e-05	0.00238777
Ap5m1	0	4.03138	1.34277	0	0	1.77946	4.74913	1.18983	4.66449	5.69567	1.8467e-05	0.00244427
Cntn4	-6.63756	-3.76533	-2.13323	-5.1263	-4.98663	-4.71912	-2.8986	-5.1924	5.21272	5.43071	1.87903e-05	0.00246137
Zfp26	-4.70797	-3.77444	-4.70797	-3.25109	-3.58005	-4.70797	-4.70797	-3.06333	4.54505	5.68644	1.88188e-05	0.00246137
Lyz1	0	3.31466	5.48921	1.84231	1.553	2.63622	1.54606	2.18069	4.83476	5.49755	1.90244e-05	0.00247363
Fggy	-0.842989	-1.24875	3.10598	1.14595	-1.05877	-2.18695	-2.18695	-0.622737	4.75062	5.48729	1.94562e-05	0.00251497
Kcnq2	0	0	4.60668	1.28599	0	1.07191	1.4739	0	4.51947	5.7807	1.97586e-05	0.00253204
Elavl4	-0.130387	4.33597	5.71138	2.98599	2.56028	-0.0266469	5.45632	0.828159	6.42827	5.34463	1.98174e-05	0.00253204
Cdadc1	1.84049	4.26138	-1.45669	-1.45669	2.20544	1.79532	-1.45669	0.54022	4.95154	5.5531	2.02194e-05	0.00256856
Mpdz	-3.81165	-0.361518	-3.62067	0.0481944	-4.95458	-3.72805	-4.95458	-3.75679	4.95772	5.4662	2.03753e-05	0.00257357
Mterf3	2.71496	2.33885	4.2904	2.40403	2.82085	3.35753	6.38923	1.46272	5.18757	5.39201	2.04974e-05	0.00257428
Tlr3	-1.15809	-1.15809	2.84922	4.18035	0.133763	0.791811	-1.15809	0.0346773	4.74715	5.54138	2.07291e-05	0.00258868
Slc16a3	1.14071	0	4.53671	2.3207	1.2985	0	0	0	4.53271	5.72719	2.19551e-05	0.00272445
Tfe3	4.29466	5.81802	0	2.73066	1.55779	4.12212	1.48304	5.59388	5.27415	5.42759	2.21743e-05	0.00272445
Ppcdc	1.98984	-1.01005	2.66889	3.60936	-1.08776	-0.725376	-1.96184	-1.96184	4.94705	5.42734	2.21861e-05	0.00272445
Per3	-5.0238	-3.55903	-0.609734	-3.00382	-5.0238	-5.0238	-0.0565513	-3.69863	4.94464	5.50345	2.24705e-05	0.00272675
Cadps2	4.15583	-0.21189	3.30486	-1.16344	-1.16344	3.25526	0.187606	0.0338547	4.92383	5.42111	2.24914e-05	0.00272675
Birc3	1.14072	0	0	0	0	4.5586	0	0	4.49298	6.02788	2.25749e-05	0.00272675
Gm29975	4.74455	0	0	0	0	0	0	0	4.50674	6.22655	2.34845e-05	0.0028212
Pde1a	-1.39706	-1.39706	-1.39706	-0.22838	-1.39706	-1.39706	-1.39706	2.85249	4.44541	5.82758	2.37018e-05	0.00283192
Zfp949	4.39057	0.937093	3.17917	0	0	0	0	4.75678	4.71863	5.68446	2.38881e-05	0.00283883
Ulk2	1.24854	0.942004	2.87111	5.58089	3.82704	0	1.47068	4.54822	4.97044	5.37557	2.4857e-05	0.00293817
Ankzf1	-3.35114	-4.59993	-1.20598	-3.09311	-4.59993	-4.59993	-4.59993	0.524899	4.81704	5.54745	2.50362e-05	0.00293842
Kcnma1	-2.48736	-2.3702	0.42579	-6.62153	-6.62153	-0.546714	-4.62307	-4.18289	5.97397	5.37069	2.51249e-05	0.00293842
Rhno1	-4.65848	-4.65848	-0.641096	-3.37134	-3.36279	-3.67855	-3.33343	-4.65848	4.645	5.43722	2.58773e-05	0.00301049
Rmnd1	0	4.64567	0	5.27953	0	4.12204	0	0	4.89746	5.75618	2.71236e-05	0.00313267
Arhgap12	5.32485	4.91586	3.57812	0	1.84285	0	0	4.11047	5.00808	5.50604	2.72696e-05	0.00313267
Rims1	-2.07841	4.29086	1.18303	3.90544	2.64315	3.95833	-2.07841	-2.07841	5.71433	5.4093	2.74677e-05	0.00313267
Polr3e	-2.21878	0.073153	0.251304	-3.64795	-3.64795	0.858699	-3.64795	2.88825	5.24898	5.40885	2.74945e-05	0.00313267
Pwwp3b	-0.31592	3.17269	3.61814	-1.45763	1.56805	-0.381947	-0.10746	-1.45763	4.82598	5.32497	2.77844e-05	0.00313776
Glb1l	-1.15627	-1.15627	2.02253	0.131734	3.80918	-1.15627	0.169988	2.60474	4.7142	5.40131	2.79414e-05	0.00313776
Coro1a	0	0	4.34517	0	0.864071	0.979681	0	0	4.45651	5.74005	2.7965e-05	0.00313776
Bcas3	-0.30161	2.72905	4.89516	-1.4527	4.92522	3.38438	0.0154711	2.28303	5.6367	5.24997	2.82363e-05	0.0031522
Lrp8	6.11905	5.1992	6.33641	1.44407	2.17079	1.28551	5.36816	1.20705	5.66263	5.22909	2.96021e-05	0.00323402
Ptprd	5.6424	0.0599186	4.67373	0.597904	2.54638	5.51205	0.321922	4.2102	5.97701	5.169	2.97252e-05	0.00323402
Sytl5	0	0	0	0	4.28528	0	1.35038	0	4.45364	5.87054	2.98993e-05	0.00323402
Tcf7l2	1.2466	7.18736	2.45773	4.09614	5.79245	6.04883	6.74115	2.18392	6.18405	5.22277	3.00288e-05	0.00323402
Zfp583	-4.37472	-4.37472	-4.37472	-2.91914	-4.37472	-4.37472	-4.37472	-4.37472	4.45826	5.86764	3.00549e-05	0.00323402
Nbeal1	-0.00123789	-1.09388	-6.12165	-1.0774	-0.84195	-4.89966	-4.00502	-6.12165	5.69108	5.28876	3.00926e-05	0.00323402
Ifitm1	0	0.946212	4.2656	0	0	0	0	1.18979	4.44672	5.70048	3.01443e-05	0.00323402
Src	-1.56428	4.27443	-1.56428	-1.56428	4.25971	0.253236	2.26608	2.96319	5.30242	5.36297	3.03303e-05	0.00323402
Mir670hg	-4.18704	-4.18704	-4.18704	-4.18704	-4.18704	-4.18704	-4.18704	-4.18704	4.41605	6.06993	3.0498e-05	0.00323402
Lnx1	0	2.54478	1.80538	5.27581	0	1.79486	2.27194	1.1911	4.71178	5.35954	3.05545e-05	0.00323402
Ndor1	-1.24232	1.35811	-1.33679	1.11057	3.37384	-2.38825	-2.38825	-2.38825	4.8855	5.35589	3.07943e-05	0.00323402
Zfp647	0	0	5.04748	0	0	0	0	0	4.54138	6.0625	3.08806e-05	0.00323402
Ryr2	-5.74199	-5.74199	-4.42582	-5.74199	0.438585	-0.751441	-0.0468561	-4.41343	5.54441	5.35372	3.09379e-05	0.00323402
Ccna1	0	0	4.58211	0	0	0	0	1.57283	4.50037	5.85009	3.10176e-05	0.00323402
Sppl2b	0.0100499	-0.446617	1.68718	-1.91311	1.5766	1.98184	-1.91311	4.16837	5.07451	5.27118	3.12834e-05	0.00324642
Sgms2	2.69045	-0.212169	2.58911	4.56793	0.571321	-0.176852	2.43713	-1.16414	4.96526	5.19353	3.20848e-05	0.00331403
Agfg1	-2.28571	-3.31564	-1.57952	-2.52952	-6.92215	-1.61872	-5.69377	-4.73674	6.39836	5.12894	3.26164e-05	0.00334333
Eme1	-0.315297	3.73641	-0.449028	-1.45898	2.42777	-0.476406	-1.45898	0.536374	4.73828	5.24696	3.30022e-05	0.00334333
Iqce	-4.85127	-0.973624	-4.85127	-0.421386	-4.85127	-3.12701	-4.85127	-3.52709	4.8002	5.41339	3.3034e-05	0.00334333
Pnpla7	-1.15521	-1.15521	-0.108169	-1.15521	2.98909	-1.15521	-1.15521	-1.15521	4.43758	5.65188	3.30623e-05	0.00334333
Ogfod1	0	4.48439	1.04452	0	1.66606	0	0	3.01859	4.54486	5.51986	3.31247e-05	0.00334333
Rpgrip1l	-4.11775	-3.17333	-4.11775	0.131007	-4.11775	-4.11775	-4.11775	-2.93048	4.57271	5.51272	3.35996e-05	0.00336304
Mtf2	-3.9094	-6.83505	-1.78626	-5.64605	-0.832791	-1.82755	-6.83505	-1.25974	5.86264	5.23736	3.37104e-05	0.00336304
Slc8a1	4.74194	0.936973	1.92536	1.28579	0	1.07499	4.98382	3.16594	4.83067	5.23641	3.37814e-05	0.00336304
Catsperg2	4.81834	0	0	0	0	0	0	0	4.51223	6.00651	3.39286e-05	0.00336304
Vldlr	1.31913	-3.13766	1.03155	0.550567	-3.95709	-3.76119	-2.32812	-0.331277	5.61615	5.10037	3.48521e-05	0.00341165
Mapt	0.239223	1.91859	-1.58816	-1.58816	3.81695	4.15748	-0.118623	3.82428	5.32593	5.22204	3.4872e-05	0.00341165
Zfp467	-4.64477	-3.96312	-5.79106	-5.79106	-3.04126	-3.78183	-2.28721	-2.12312	4.92831	5.22191	3.4882e-05	0.00341165
Hivep2	-4.73425	0.573771	-4.35297	0.129676	-4.7672	-0.339713	-4.48864	-2.89806	6.20621	5.09566	3.52353e-05	0.00342957
Wdr17	0	0	4.40301	0	0	0	0	0	4.45413	5.98173	3.53756e-05	0.00342957
Gria4	4.79972	0.944682	0	0	3.23848	0	1.32404	0	4.59362	5.48097	3.57992e-05	0.00345549
Osbp2	1.24958	0	4.58214	0	0	1.3083	0	0	4.50849	5.59538	3.68241e-05	0.00353001
Csmd3	0.421772	-0.351179	-0.109699	-0.407111	-0.710111	3.86777	-1.57598	-0.25465	4.72134	5.13202	3.68907e-05	0.00353001
Phldb1	2.3001	0	4.88654	1.16782	2.79153	0	1.47323	1.18904	4.63743	5.26742	3.7236e-05	0.00353495
Dnah7b	1.33957	4.38903	1.8179	0	1.54781	0	5.06999	1.87394	4.77238	5.2671	3.72622e-05	0.00353495
Trp53	0	0.941571	3.73575	0	5.10706	1.26428	4.13961	4.53449	4.92949	5.26459	3.74638e-05	0.00353889
Megf11	0	0	1.34579	1.5157	0	1.23232	2.13003	4.70888	4.56435	5.34608	3.7994e-05	0.00356911
Lyrm1	-3.70976	-2.77553	0.859135	-3.70976	-2.58179	-2.63743	-3.70976	-3.70976	4.59463	5.34443	3.81245e-05	0.00356911
Rttn	0	0	0	0	0.861421	3.35345	4.26741	1.18668	4.5205	5.44616	3.83817e-05	0.00356911
Slc12a9	0	0	0	4.4751	1.12794	3.63167	0	0	4.56539	5.56975	3.86737e-05	0.00356911
Gpr35	-1.39704	0.338978	4.266	-0.225949	0.330715	0.422966	-1.39704	0.697716	4.73687	5.17464	3.87307e-05	0.00356911
Rapgef6	-1.93271	-2.96321	-2.86545	-6.36054	-2.85097	-6.36054	-5.0286	-6.36054	5.18956	5.24888	3.87526e-05	0.00356911
Dnajc27	-3.02651	1.39331	-3.15471	0.437018	-3.04137	-2.90607	-2.83911	-2.17261	4.98833	5.05248	3.89534e-05	0.00357064
Irf5	-2.67615	1.26588	1.43515	-2.2673	-3.6239	-0.751415	-1.4491	-1.89614	5.37573	5.05006	3.91733e-05	0.00357064
St3gal4	0	0	0	0	0	4.80401	0	1.32123	4.5209	5.71826	3.93467e-05	0.00357064
Ttc41	1.93643	2.23612	4.67463	0	0	0	1.32369	0	4.56328	5.43252	3.94448e-05	0.00357064
Alg9	-2.58847	2.06996	-2.58847	-2.58847	-0.400931	-0.198588	-2.58847	-2.58847	4.59886	5.43074	3.95861e-05	0.00357064
Shank2	3.85728	-0.491538	-0.0202296	4.96677	4.68954	3.58446	-0.115649	1.29769	5.6459	5.04343	3.97822e-05	0.00357064
Fndc3c1	-1.39699	3.71655	-0.0783466	-1.39699	3.06629	-1.39699	-1.39699	2.46756	4.84365	5.32258	3.98999e-05	0.00357064
Gpank1	1.92364	0	0	3.49768	0	4.15368	0	5.49307	4.82646	5.42455	4.00803e-05	0.00357232
Lsp1	0	1.66033	4.74432	0	2.92481	0	0	0	4.57416	5.54846	4.02819e-05	0.00357587
Tmem144	1.45127	0	0	0	0	0	0	4.45656	4.47389	5.6944	4.10861e-05	0.00362412
4932438A13Rik	-6.36209	-2.40702	-2.81046	-3.12296	-1.11917	-6.94362	-0.899361	-0.914973	7.05686	5.0288	4.11596e-05	0.00362412
Dlgap1	4.05637	3.04359	-1.56805	-1.56805	0.122771	3.18967	-1.56805	-1.56805	5.05135	5.30271	4.15875e-05	0.00362412
Atp9b	1.73641	0	0	1.83625	3.92944	1.30476	4.78341	0	4.66412	5.30229	4.1624e-05	0.00362412
Speg	-0.26374	-1.51286	-0.504076	-1.51286	2.83651	-0.530769	3.33501	0.650098	4.72602	5.14193	4.16453e-05	0.00362412
Esrrg	2.87879	-1.08911	-2.55901	-1.0563	-2.55901	0.571379	0.41134	-1.36388	4.80932	5.1385	4.1964e-05	0.00363754
Bcl9	1.01142	-2.18443	0.340421	-0.670963	3.42096	-1.10736	2.45506	1.6577	5.04322	5.07273	4.22156e-05	0.00364505
Spats2l	-1.15616	0.0708478	3.48334	0.868299	-1.15616	0.629724	0.170043	3.24051	4.71226	5.12633	4.31135e-05	0.00370809
Cfap65	0	0	1.47863	0	4.90243	0	1.48859	1.18718	4.56834	5.38005	4.38247e-05	0.00375465
Cplane1	0.941162	-4.1668	0.625151	-4.1668	-4.1668	-4.1668	-4.1668	-4.1668	4.87776	5.49729	4.44365e-05	0.00378375
Ttll9	0	0	4.40044	0	0	0	1.34597	1.57213	4.48505	5.49647	4.45067e-05	0.00378375
Rgs19	-1.1509	-1.1509	3.2875	-1.1509	1.51594	-0.0789951	-1.1509	-1.1509	4.51657	5.36726	4.49665e-05	0.0038082
Tgfb1i1	-0.699396	1.15319	-0.330636	-4.2688	-4.2688	-2.32336	-4.2688	-3.07106	4.95402	5.17553	4.53941e-05	0.00382974
Cept1	-2.23956	-1.67268	-5.7672	-4.25561	-3.11128	-5.7672	-0.466473	-2.54322	5.18909	5.10039	4.56711e-05	0.00383846
Rhbdf1	2.84458	-0.14394	-1.60791	-1.60791	-0.7431	-1.60791	-1.60791	2.79595	4.65682	5.25526	4.59201e-05	0.00384401
Lingo1	-0.32883	1.66209	0.242709	-1.58989	2.80322	4.81489	-1.58989	2.5845	5.2221	5.09366	4.636e-05	0.00384401
Fktn	0	0	3.47597	5.04319	0	1.23147	1.32469	0	4.62668	5.35191	4.63768e-05	0.00384401
Mtmr2	6.83122	5.55333	1.59507	1.85419	5.19395	4.0545	1.468	4.48334	5.67203	5.03013	4.65185e-05	0.00384401
Trappc12	-3.2996	-0.50858	-5.03959	-5.03959	-4.1692	-3.02647	-2.80858	-5.03959	4.78984	5.16298	4.66429e-05	0.00384401
Tstd2	-1.04878	-2.18946	-1.18443	-2.18946	-2.18946	-2.18946	-0.866033	2.2656	4.50867	5.24638	4.67806e-05	0.00384401
Resf1	0	2.71623	1.01239	0	2.84059	3.37046	5.64003	0	4.8119	5.23298	4.81108e-05	0.00393867
Lrrc9	1.1419	0	4.17832	1.50911	0	0	0	4.591	4.63518	5.32768	4.86956e-05	0.00395922
Sspo	0	0	0	0	4.14508	0	0	0	4.42302	5.79322	4.87201e-05	0.00395922
Tmc6	0	3.66263	5.05374	0	0	0	1.32526	1.32231	4.65661	5.32323	4.91343e-05	0.00397826
Nat14	-1.28103	-2.06159	-3.68626	-5.13709	-5.13709	-5.13709	0.520796	-2.20248	5.08165	5.13234	4.98384e-05	0.00401995
Ksr1	0	0.933502	0	1.28599	4.69995	0.977729	1.50825	0	4.52528	5.21446	5.0013e-05	0.00401995
Opcml	0	0	1.32028	1.173	3.70895	4.89303	4.30433	0	4.78315	5.20937	5.05489e-05	0.00404831
Myt1	2.40405	-0.0659133	-0.695161	-3.97613	1.53016	-3.92568	-3.06669	0.463486	6.24675	4.93701	5.09786e-05	0.00406798
Uty	-3.29811	-3.82264	-3.591	-0.55071	0.575974	-5.04181	-3.05274	-5.04181	5.08258	5.04702	5.1432e-05	0.0040894
Frmpd4	3.39224	-1.15087	-1.15087	0.135104	-0.0229478	-1.15087	0.172554	-1.15087	4.50601	5.19856	5.17073e-05	0.00409655
Slc17a2	0	0	0	0	0	0	1.34778	4.15896	4.42487	5.56149	5.23434e-05	0.00411828
Dtnb	-2.10676	0.593655	2.83634	0.299212	1.51253	-2.26514	-1.2646	-3.2547	5.19691	4.97836	5.23542e-05	0.00411828
Gpr160	-1.15525	3.0208	-1.15525	-1.15525	-1.15525	-1.15525	-1.15525	-1.15525	4.43647	5.55337	5.31276e-05	0.0041643
Ehbp1l1	-4.49246	-3.54746	-4.49246	-4.49246	-4.49246	-4.49246	-3.14601	-4.49246	4.46923	5.39856	5.37454e-05	0.00419784
Porcn	1.13841	4.90879	0	0	3.71602	1.0731	0	1.18945	4.65106	5.17353	5.44951e-05	0.00424141
Cars2	0	4.02916	0	0	0	0	1.50616	0	4.42836	5.53572	5.48728e-05	0.00425582
Nvl	-3.58887	-4.72579	-4.72579	-4.72579	-4.72579	-4.72579	-2.61347	-2.85535	4.53518	5.25952	5.5879e-05	0.00431871
Clca3a1	0	0	3.88832	0	0	0	0	0	4.38942	5.7094	5.62438e-05	0.00433176
Trim2	-0.490758	4.51146	3.16741	-0.230417	0.272634	2.54365	-1.73878	3.83484	5.41507	4.94311	5.67474e-05	0.00435536
Arnt	0.538078	-0.507622	2.78269	3.66474	-1.45774	0.130505	-1.45774	1.82025	4.81432	4.99796	5.73786e-05	0.00438857
Gm46430	-1.50801	3.14879	-0.455881	-1.50801	-1.50801	3.6856	-1.50801	3.11488	4.94811	5.14588	5.77539e-05	0.00440204
Erich2	-1.4596	2.51818	-1.4596	-1.4596	-1.4596	-1.4596	-1.4596	-1.4596	4.42054	5.50385	5.81754e-05	0.00441893
Arhgap33	1.14077	0	1.00518	1.28605	0.861585	0.977841	2.50401	4.65988	4.55169	4.98675	5.8833e-05	0.00442976
Traf3	0	0.93417	4.23456	0	4.09522	0	1.48843	0	4.58977	5.232	5.90797e-05	0.00442976
Setd6	0	0	0	0	0	3.93839	1.32631	0	4.41114	5.49385	5.92541e-05	0.00442976
C87436	0	4.73358	4.76614	5.08064	0.874886	3.46152	0	1.44623	4.999	5.05204	5.9317e-05	0.00442976
Ildr2	0	4.9167	0	1.51356	3.31699	1.07294	1.32493	0	4.63875	5.13316	5.932e-05	0.00442976
Cdc14a	-1.15535	-0.208668	0.170091	3.01229	2.47893	-1.15535	-1.15535	3.21908	4.68893	5.04677	6.00009e-05	0.00446552
Pde2a	-0.311961	-1.45748	2.85483	4.02383	-0.118581	0.258243	-1.45748	1.21266	4.84288	4.96904	6.12085e-05	0.00454011
Nin	2.03387	-1.15283	3.59662	-1.15283	1.3066	-0.173724	-1.15283	-1.15283	4.61555	5.11216	6.19994e-05	0.00458339
Scn8a	0	0	0	0	0	1.30886	4.13686	4.51043	4.60215	5.31995	6.25819e-05	0.00461104
Dtna	0	1.84553	5.19855	2.43165	2.17238	0	4.1629	3.57911	4.84879	5.02027	6.35591e-05	0.00464296
Lrrfip1	6.16114	1.26171	3.6773	4.10604	2.1545	3.63948	1.35215	0	5.11057	4.95171	6.3627e-05	0.00464296
Gata3	0	2.2076	0	0	0	0	0	4.79762	4.52346	5.45498	6.36454e-05	0.00464296
2810408A11Rik	0	0	4.10705	0	0	0	1.32595	0	4.4255	5.45026	6.42012e-05	0.00466811
Hinfp	-4.84077	-4.84077	-4.84077	-2.81987	-4.84077	-4.84077	-3.28678	-4.84077	4.53768	5.2855	6.69127e-05	0.00482879
Lrch3	0	4.93001	5.06381	0	5.33418	5.30757	0	0	5.25493	5.16957	6.70564e-05	0.00482879
Rnf32	0	3.78124	4.94144	0	5.44791	1.07669	0	2.2365	4.96724	5.07488	6.70666e-05	0.00482879
Kbtbd3	2.77911	4.54633	3.78603	3.76463	0	5.73509	6.27212	6.3375	5.73994	4.92459	6.76077e-05	0.00485195
Atf7ip	1.06782	4.16515	1.12992	-0.217882	-1.39688	4.24064	-1.39688	2.87914	5.1686	4.92219	6.79714e-05	0.00486226
Lgals8	0	4.6376	3.86094	0	1.24675	0	1.34676	0	4.62727	5.15923	6.84802e-05	0.00488286
Unc13b	0.990333	1.25745	-3.74685	-3.74685	-3.74685	-3.74685	-1.18079	-2.42207	4.87555	5.06108	6.90479e-05	0.00490751
Tnip1	-1.39704	2.45164	-0.387317	-1.39704	-0.529363	-0.128322	1.2204	3.83418	4.7325	4.91294	6.93953e-05	0.00491101
Fam149b	2.5218	3.5503	-1.59843	-0.424127	2.05976	-1.59843	-1.59843	-0.40292	4.82501	4.97895	6.95416e-05	0.00491101
Cep63	1.90729	3.00384	5.55161	1.49751	4.36826	0.989195	5.60409	0	5.16222	4.90842	7.01014e-05	0.00493478
Cep164	-3.2669	-4.52899	-1.23504	-4.52899	-3.23993	-3.23034	0.515423	-3.33371	4.81444	4.90098	7.12799e-05	0.00500181
Ddx55	1.9245	0	4.1469	0	4.04586	0	0	2.90364	4.62143	5.13209	7.23671e-05	0.00503437
Trmt2b	4.03112	0	1.00834	1.83695	0	0	0	0	4.43203	5.244	7.25429e-05	0.00503437
6820408C15Rik	1.14611	0	5.10869	4.2814	4.1923	0.986541	0	3.52817	4.90574	4.95895	7.26402e-05	0.00503437
Rubcn	-2.59691	1.66102	-2.59691	-2.59691	-2.59691	-1.61903	-2.59691	-1.41004	4.48995	5.13014	7.2655e-05	0.00503437
Arvcf	1.13737	1.66035	1.32669	1.28637	1.12796	0	4.88896	1.47011	4.58809	4.88774	7.34269e-05	0.00507196
Slc16a12	2.13682	0	0	0	0.862834	4.23314	0	1.18791	4.47189	5.11606	7.477e-05	0.00514865
Gm52298	-1.39706	-0.452955	-1.39706	-1.39706	-1.39706	-1.39706	3.27072	-1.39706	4.49078	5.22556	7.51989e-05	0.0051621
Mrpl39	6.0212	5.93785	5.50841	3.90584	4.48755	1.22943	5.97408	0	5.77092	4.87165	7.61261e-05	0.00520957
Iqsec3	4.9499	0	1.00684	3.07949	0	1.99399	0	0	4.62829	5.10144	7.70309e-05	0.00525522
Pparg	1.82549	0	2.6118	0	4.88519	1.65402	0	1.18802	4.60773	5.00652	7.74855e-05	0.00526997
Ppara	1.34862	3.21529	0	0	4.50449	0	0	0	4.55751	5.2052	7.82489e-05	0.00530446
Slx4	1.14132	0.944839	4.22243	0	1.33959	0	1.32418	0	4.47264	5.00054	7.84726e-05	0.00530446
Mrps10	0.397883	3.80261	1.82337	-0.306501	-1.59681	-0.610703	-0.246156	2.57084	4.87636	4.79487	7.97319e-05	0.00537315
Fyb	0	0	4.11963	1.83687	0	0	0	0	4.43432	5.32649	8.07116e-05	0.00542264
Ccdc114	0	0	1.60188	0	0	2.81525	4.76787	0	4.56174	5.18107	8.2027e-05	0.00547227
Sipa1l3	2.13467	-1.17435	2.97271	-1.17435	3.84102	3.75915	5.61984	4.01246	5.63149	4.83638	8.23991e-05	0.00547227
St18	-4.78161	-3.50224	-2.04709	-3.32278	-5.04857	-2.56837	-4.59403	-0.665564	5.19594	4.73122	8.25545e-05	0.00547227
Tns3	1.73021	1.41732	-3.58766	2.7511	0.243725	-3.58766	1.8807	-2.25978	5.5739	4.83495	8.26637e-05	0.00547227
Zbtb25	-0.0213375	-1.16448	-1.16448	4.23624	0.0753309	3.23551	3.2801	2.28481	4.98701	4.83413	8.28175e-05	0.00547227
Arap1	5.71555	5.27271	5.23593	3.11583	0	1.72516	1.54125	2.23258	5.25623	4.83302	8.30237e-05	0.00547227
Cars	4.60608	3.97531	1.04999	0	4.39939	1.07527	0	2.4123	4.79268	4.89633	8.32854e-05	0.00547227
Prr5l	0	4.25991	0	0	0	0	2.23471	1.18738	4.48061	5.1724	8.34309e-05	0.00547227
Clca3a2	0	0	3.67571	0	0.869011	0	0	0	4.37368	5.3064	8.37811e-05	0.0054771
Gpsm1	-3.84034	-3.84034	-3.84034	-2.66883	-3.84034	-3.84034	-3.84034	-3.84034	4.38603	5.30499	8.40001e-05	0.0054771
Hdac10	-4.51385	-3.57866	-4.51385	-4.51385	-4.51385	-4.51385	-4.51385	-4.51385	4.45721	5.30197	8.44742e-05	0.00549182
Ubp1	1.82617	2.35984	5.1538	0	1.55528	4.60182	0	5.05698	5.00674	4.88011	8.62939e-05	0.00559367
Zfp946	0	3.91347	3.98531	0	0	0	0	1.32124	4.53782	5.15149	8.69175e-05	0.00561761
Agbl3	2.55801	-2.54155	-2.54155	-1.37288	-1.20489	-1.27096	-2.54155	0.273244	4.66665	4.87447	8.73658e-05	0.00563013
Tmem229b	-4.92529	-2.83166	-2.29794	-3.63888	-3.79732	-4.92529	-4.92529	-4.92529	4.59309	4.94638	8.80158e-05	0.00565553
Mok	4.18044	0.946752	0	0	0	0	0	0	4.43059	5.27826	8.82835e-05	0.00565628
Edem3	-2.13123	1.20644	1.19885	-2.67901	2.43126	1.14976	-2.63817	-1.87893	5.55989	4.6981	8.9242e-05	0.00567402
Vps9d1	1.4485	0	1.04642	0	4.63569	4.07066	1.32515	0	4.6505	4.93969	8.92746e-05	0.00567402
Lrrc27	0	0	0	0	0	4.01367	4.29925	1.18725	4.57176	5.13752	8.93303e-05	0.00567402
Mical3	5.99023	2.97415	1.00097	2.06807	4.05888	4.01782	0.159186	3.5466	5.7673	4.69413	9.00801e-05	0.00570525
Capn5	2.59939	-0.969436	-0.423115	-1.90293	-1.90293	-1.90293	-1.90293	-0.716252	4.51786	4.9319	9.07638e-05	0.00573212
Ank2	-4.35468	0.134812	-2.70654	0.19453	-0.531397	-4.38522	-3.80995	-5.13605	6.02202	4.68755	9.14857e-05	0.00576125
Tbc1d19	1.138	4.62969	0	1.45567	0	1.87476	3.47175	1.87289	4.62665	4.85194	9.1784e-05	0.00576362
Dop1a	-2.96085	-0.116088	-3.08776	-2.81342	1.23125	2.1199	-1.43316	-0.826197	5.35334	4.68491	9.20545e-05	0.00576423
Setd4	0	0	0	3.98279	0	0	0	1.32301	4.40643	5.25307	9.25253e-05	0.00577734
Qrich2	0.149208	2.78767	-1.58478	-0.0732867	-1.58478	-0.512875	-1.58478	-1.58478	4.51974	4.91691	9.36999e-05	0.0058342
Eif2ak4	1.33452	4.78499	3.88698	4.00395	1.1283	5.74263	4.80858	6.24333	5.54757	4.72252	9.41869e-05	0.00584292
Zfp518a	1.99527	0.947621	1.84857	0	0	2.77083	5.11848	3.32321	4.72519	4.83927	9.43685e-05	0.00584292
Zfyve26	1.14072	3.3004	0	0	0	0	1.55398	4.39335	4.54267	4.99767	9.52382e-05	0.005866
Ptpn12	-0.3693	-1.51275	3.52897	-0.342039	0.625809	2.43006	-1.51275	0.0528004	4.72871	4.77185	9.52721e-05	0.005866
Crppa	-1.39706	-0.463538	-0.391971	-1.39706	0.33277	-1.39706	3.23103	0.054233	4.53718	4.82846	9.66331e-05	0.00592653
Ppp1r12b	2.69448	-1.15467	-0.107951	3.5438	1.30805	0.115928	0.170748	-1.15467	4.6661	4.76475	9.68098e-05	0.00592653
Atxn7l1	-0.605262	-0.772791	-1.07537	-2.89442	1.38984	2.34717	-2.89442	-2.89442	4.84321	4.82645	9.70596e-05	0.00592653
Ggta1	0	0	3.99264	0	0	0	0	0	4.40089	5.3921	9.75849e-05	0.00594219
Glmn	-2.48888	-1.30259	-3.82913	-2.53832	1.72851	0.58096	-2.4779	-2.63147	4.94822	4.70594	9.78594e-05	0.00594254
Cenpx	2.85497	1.2177	4.94984	5.71597	5.15303	3.2728	1.33214	1.55347	5.21628	4.70299	9.85281e-05	0.00596676
Rnf25	0	1.27548	0	3.1667	4.56324	0.978142	0	1.47031	4.56824	4.88312	0.000100681	0.00606688
Mib2	1.24793	1.73293	5.5752	5.02506	5.83538	3.63669	0	5.39949	5.47517	4.74713	0.00010073	0.00606688
Dzip1l	0	4.66611	0	0	1.12792	1.07189	0	0	4.50459	5.06634	0.000102739	0.00616164
Lpar1	2.22698	0	3.64499	4.90505	0	0	1.34716	1.4501	4.65279	4.87305	0.000102861	0.00616164
Rasgrp2	1.83769	0	4.96729	2.85515	1.84536	0	1.34738	1.97485	4.66926	4.7963	0.0001037	0.00619312
Arhgap32	4.63645	5.15438	4.96291	0	0	3.17868	3.70916	0	5.07235	4.86705	0.000104184	0.00619312
Trpm4	-3.82558	-2.88524	0.0653905	1.41068	-0.546412	-3.82558	-3.82558	-3.82558	4.83672	4.86685	0.000104227	0.00619312
Fer	1.14647	5.53658	3.99954	4.00312	3.03993	1.59049	0	1.4643	4.95164	4.72484	0.000105926	0.00627719
Pus7	-1.39706	-0.463533	-1.39706	-1.39706	0.535388	-0.419303	3.02931	-1.39706	4.49288	4.8565	0.000106552	0.00629739
Samd4	2.22049	5.2454	4.12647	0	3.03578	2.89147	0	0	4.83719	4.85405	0.00010711	0.00631348
Meis2	2.99875	1.06346	1.15628	4.1675	5.04415	4.11411	5.04083	-0.723404	6.44243	4.61881	0.000107569	0.00632365
Zdhhc4	0	1.18711	3.66274	0	0	0	0	4.58268	4.56839	5.03816	0.000108603	0.00636218
Pex5	1.05935	-0.773324	-3.73489	-3.73489	-3.73489	-2.50416	-2.38746	-3.73489	4.67329	4.8467	0.0001088	0.00636218
Frmpd1	0	4.54801	3.71399	0	0	0	0	1.32153	4.58524	5.03551	0.000109172	0.00636711
Ank1	1.92371	0.939812	3.72297	0	0	4.30284	5.01595	0	4.80698	4.83994	0.000110381	0.00642066
Fn1	0	0	4.34243	0	0	2.37339	0	1.47062	4.49979	5.02783	0.000110838	0.00643038
Arpp21	-1.5763	3.62125	-0.027118	-0.0668429	1.79249	0.0097424	0.955248	-1.5763	4.75005	4.70133	0.000111698	0.00644821
Dbndd1	0	0.94457	0	1.52678	0	1.07225	4.3192	1.32153	4.47886	4.83347	0.000111913	0.00644821
Hace1	-2.59846	-2.59846	1.04372	-2.59846	-1.7359	1.85128	-2.59846	-2.59846	4.59534	4.91821	0.000112124	0.00644821
Slc4a10	4.17553	4.53153	0.992697	3.16614	5.34727	2.77975	0.181579	0.154285	5.60551	4.6003	0.000112371	0.00644821
Tmem161a	-4.18433	-4.18433	-4.18433	-2.34765	-3.05625	-4.18433	-4.18433	-4.18433	4.4403	5.01811	0.000112986	0.00644821
Adgrv1	1.14095	0	0	0	0	0	4.30111	1.18856	4.44366	5.01673	0.000113294	0.00644821
B3galnt2	-1.45848	3.08274	-0.13608	-0.286134	3.05928	-1.45848	0.542977	1.88705	4.76619	4.69496	0.000113317	0.00644821
Samd11	0	4.5051	4.36045	0	2.77005	0	2.12998	1.44932	4.71602	4.82696	0.00011348	0.00644821
L3mbtl4	-4.39458	-4.39458	-4.39458	-2.88548	-4.39458	-4.39458	-4.39458	-4.39458	4.45654	5.14013	0.000114298	0.00647803
Sntg1	3.02428	2.95405	-1.152	0.0143731	-0.289516	-1.152	-1.152	0.0356039	4.59159	4.74818	0.000115271	0.0065011
Serpinb1c	0	2.53379	4.74477	0	2.82473	1.50791	0	0	4.59938	4.9031	0.000115666	0.0065011
Tube1	0	3.33578	0	0	0	1.30824	0	4.31013	4.52943	5.00615	0.000115685	0.0065011
Sema5a	0	4.92629	0	0	1.24596	3.84025	0	1.46787	4.66394	4.9022	0.000115881	0.0065011
Ankrd13b	4.0263	1.92677	2.31855	2.52524	-0.222731	-0.836092	-1.9135	-1.9135	5.12406	4.67935	0.000117386	0.00656802
Cdkl3	1.90422	3.00047	5.25664	5.52887	2.48808	5.63814	1.48297	0	5.29066	4.67792	0.000117767	0.00656802
Abcc1	0	0	2.15054	0	2.30733	1.27171	4.15778	4.19982	4.62245	4.80879	0.000117965	0.00656802
Zscan30	-1.61262	-0.679122	-1.61262	-1.61262	0.843414	-1.61262	2.93732	-1.61262	4.52523	4.88834	0.000119239	0.00662227
Gale	0	0	2.95145	4.48409	0.861845	2.46117	0	0	4.56202	4.88348	0.000120439	0.00667015
Arhgef10l	-3.21919	0.591212	-3.04909	0.865379	-4.36346	0.865765	-4.36346	-4.36346	5.17464	4.72726	0.000120705	0.00667015
Eef2k	-2.8939	0.672972	1.08309	-4.14244	-0.93483	-4.14244	-2.79112	-4.14244	4.96205	4.72188	0.000122144	0.00673286
Snph	-2.54461	-4.93919	-3.39084	-2.05908	-1.17459	-3.86491	-4.93919	-3.61594	4.73489	4.65836	0.000123092	0.00675568
Rgs22	0	0	3.78767	0	0.867441	1.2689	0	0	4.3999	4.97444	0.000123169	0.00675568
Mtif2	-3.72485	-1.1961	-1.77074	-3.9518	-2.53369	-5.46706	-5.46706	-3.90887	4.92497	4.65419	0.000124259	0.00679857
Eml1	-3.45226	0.651261	-3.45226	-3.45226	-3.45226	-2.38034	-3.45226	-1.47487	4.52803	4.86024	0.000126356	0.00689621
Trps1	-4.27067	0.186618	0.882004	-4.83196	-0.659719	-3.06168	-0.0411073	-3.393	6.1017	4.5485	0.000126993	0.00691393
Ehbp1	-0.187854	4.55122	4.18763	5.21577	4.89502	0.953572	6.51304	3.34656	6.55505	4.54684	0.000127494	0.00692413
Prg4	-0.427542	-1.34426	-4.27131	-4.09061	-3.74546	-3.68394	-4.10184	-3.52389	5.11017	4.5405	0.000129421	0.00701155
Rps6ka6	1.13731	0.94453	0	3.85434	0	4.30146	1.47369	0	4.58139	4.75828	0.000131419	0.00708746
Carmil2	-3.83186	-2.43177	-1.5166	-3.80084	-1.31471	-4.9717	-4.9717	-4.9717	4.73167	4.68824	0.000131547	0.00708746
Plag1	-4.68744	-3.74137	-4.68744	-3.40098	-1.78497	-4.68744	-2.60317	-1.10708	4.65583	4.68654	0.00013204	0.00708746
Nkx2-2	1.14284	0	0	1.16954	0	0	4.10278	0	4.42447	4.93847	0.000132265	0.00708746
Catsper2	1.83678	0	4.35443	0	1.92848	0	1.32342	0	4.50569	4.83752	0.000132425	0.00708746
Rpap2	-1.61273	-1.61273	-1.61273	-1.61273	-1.61273	-1.61273	3.13938	-1.61273	4.50043	5.05898	0.000133159	0.00708915
Nrg2	1.14246	4.44896	0	1.28748	3.73437	0.98059	3.43557	1.19005	4.67288	4.62318	0.000133296	0.00708915
Ccdc148	-1.61825	1.81957	-2.96287	1.00148	-1.83473	-0.181399	-2.96287	-2.96287	4.73166	4.68183	0.000133419	0.00708915
Ltf	2.92276	3.84365	5.64561	0	3.76378	2.14347	2.39755	3.06481	5.0006	4.62138	0.000133839	0.00709445
Paox	0.986546	0.481394	-1.46002	3.4478	-1.46002	-0.47955	-1.46002	1.97513	4.66745	4.67723	0.000134782	0.00712182
Zfp641	-4.08875	-4.08875	-4.08875	-4.08875	-3.22738	-0.54705	-4.08875	-4.08875	4.50508	4.92815	0.000135	0.00712182
Def8	3.0517	-0.527899	-1.46137	-1.46137	-1.46137	-1.46137	-1.46137	0.183447	4.50912	4.82574	0.000135691	0.00714121
Mtif3	2.92177	5.64401	4.65166	1.29136	0	3.06709	3.5861	2.9572	5.05381	4.61335	0.000136298	0.00715611
Itsn1	-3.26285	-2.81406	-3.50089	-3.33952	-4.51181	-4.51181	0.378944	-1.30007	4.76492	4.60885	0.000137695	0.00720683
Cacnb3	4.2988	3.68517	4.02939	-0.953444	1.17171	2.80998	-0.44256	4.52246	6.27577	4.51362	0.000137916	0.00720683
Arid3a	-1.15645	0.113491	2.69457	-1.15645	-1.15645	-1.15645	-1.15645	-1.15645	4.40988	4.91495	0.000138583	0.00722368
Etv1	0.0715667	2.73706	4.97107	2.28683	4.50301	5.85963	5.60229	3.46442	6.196	4.51064	0.000138892	0.00722368
Dpf1	4.53256	2.35782	1.33481	3.46195	5.29631	1.7857	0	1.32495	4.90418	4.60121	0.000140099	0.00725267
Apba2	-4.42138	-4.42138	-3.41635	-3.13541	-3.29347	-3.34949	-2.93259	-3.10016	4.51059	4.60119	0.000140105	0.00725267
Hydin	0	4.17671	1.05269	0	4.03671	0	3.80435	4.93916	4.87027	4.72679	0.000140588	0.00726064
Akap6	1.73904	0.946839	1.00849	4.6736	2.72063	0	4.30171	0	4.69873	4.65541	0.000141432	0.0072708
Reps2	-3.24997	0.117871	-3.44486	0.225407	0.998432	-3.27282	-4.49835	-4.49835	5.12047	4.597	0.000141442	0.0072708
Dgkd	5.41427	3.42601	0	1.29026	3.03713	3.93873	0	1.44709	4.86991	4.65306	0.00014217	0.00727955
Dzip1	3.12254	0.229507	-0.511332	-1.51673	-1.51673	-1.51673	-0.170789	0.0554813	4.56328	4.65274	0.000142271	0.00727955
Tnr	2.15205	5.67668	0	1.44453	4.73879	5.16007	2.0053	2.94599	5.1822	4.59313	0.000142689	0.00728407
Gpr85	4.20934	1.90453	0	0	0	0	3.45496	0	4.5345	4.89901	0.00014304	0.00728516
Exd2	2.50214	2.2881	-1.51118	1.54102	3.05298	0.00407277	-1.51118	-1.51118	4.77343	4.64764	0.000143882	0.0073112
Slc37a3	0.513133	1.66464	0.158797	-2.96764	-0.593542	-3.26994	-4.25986	-4.25986	5.23377	4.5841	0.000145642	0.00738367
Pcnx3	0	4.06775	5.69641	1.97741	4.80879	4.30311	5.4977	0	5.32541	4.63897	0.000146667	0.0074186
Gm16867	0	0	0	0	4.15473	1.305	1.32526	0	4.44882	4.88141	0.000148132	0.00747561
Ano2	0	0	0	0	0	0	4.03246	1.32293	4.41089	4.9934	0.000150735	0.00758828
Fbf1	3.52677	4.83926	3.50185	0	0	0	1.34774	0	4.69869	4.77395	0.000151051	0.00758828
Tanc1	4.26094	0	4.0012	5.27492	5.01633	0	1.35186	2.09447	5.05161	4.62385	0.000151651	0.00760113
Znrf1	0	4.86456	2.83537	1.29145	1.55588	4.13549	5.70523	2.90188	5.07186	4.56107	0.000153455	0.00767415
Ccdc30	4.38681	0.93346	2.5077	1.28597	0	0	0	0	4.50349	4.76468	0.000153983	0.00768318
Spindoc	-1.46016	3.28984	-0.133879	0.064169	1.97394	-1.46016	0.708831	-1.46016	4.65538	4.60844	0.000156912	0.00780123
Adarb1	4.40538	4.93299	0	0	3.73822	0	5.12858	5.19583	5.18817	4.67517	0.000157055	0.00780123
Tex30	2.12492	4.05047	2.20457	0.525937	3.3533	-0.281019	-1.50687	-1.50687	5.06045	4.54918	0.000157658	0.00781359
Lrp12	0.566683	2.45922	-1.51499	-1.51499	-1.51499	-1.51499	-1.51499	-1.51499	4.45365	4.84863	0.000158123	0.00781914
Klhl26	2.8497	2.79428	1.43465	-1.96129	1.62078	-1.96129	-1.96129	-1.96129	4.87787	4.67088	0.000158511	0.0078208
Ice2	0	2.03627	2.79449	1.17689	5.4036	4.23735	4.77103	0	4.98043	4.60201	0.000159159	0.00783532
Pggt1b	-1.57994	3.36609	-0.0340594	0.683779	1.35658	-0.275639	-1.57994	-0.257411	4.67993	4.54201	0.000160246	0.00786942
Gm26911	1.24923	0	0	0	0	4.09388	0	0	4.42952	4.96009	0.000160564	0.00786942
Cspp1	-0.386882	-4.26358	-1.63263	-0.401086	-5.44249	-4.14912	-4.11083	-4.11649	5.15327	4.48824	0.00016201	0.00791387
Cntn5	0	4.19023	1.57214	1.16591	0	0	1.50801	1.47033	4.48483	4.66021	0.000162187	0.00791387
Oxr1	-0.0995909	-0.631248	1.40034	-3.72293	1.3539	-3.6777	-2.16037	-2.42914	5.88565	4.44045	0.000164014	0.00798537
Palld	0	0	0	4.81534	2.56061	1.23236	1.34592	1.18703	4.561	4.65351	0.00016454	0.0079934
Mical1	0	0	3.92095	0	0.866606	0	0	1.46805	4.41413	4.82715	0.000165041	0.00800015
Sfxn1	3.52928	0	4.97707	2.29532	2.92798	0	0	3.89668	4.79125	4.64475	0.000167671	0.00810987
Map2k5	-0.765496	-0.960095	3.85515	0.768728	2.36685	0.426236	-1.91205	1.49428	4.96303	4.4687	0.000169538	0.00818224
Ppfibp1	0	2.00251	4.11257	1.51843	3.70976	0.984486	0	4.99559	4.79425	4.56726	0.000171897	0.00827804
Prrg3	0	0	3.48943	0	0.866759	0	0	2.89983	4.41123	4.79745	0.000175121	0.00841496
Enpp2	0	0	0	0	2.30878	4.1424	0	0	4.45314	4.91239	0.000175806	0.00842247
Lrriq1	-1.15422	2.47377	3.36583	0.133017	2.25189	-1.15422	-1.15422	-1.15422	4.65217	4.62212	0.00017604	0.00842247
Tepp	1.734	4.25773	2.64197	0	0	0	2.10083	0	4.52386	4.69154	0.000179258	0.00854991
Rgl1	0	3.19429	1.84945	1.16712	0	1.99445	1.32448	4.77524	4.61657	4.54693	0.000179825	0.00854991
Rusc2	4.453	3.89857	0	0	0.864588	0	3.04457	1.46904	4.65023	4.61165	0.000180056	0.00854991
Nexn	1.14375	0	1.04855	0	3.7058	0	0	0	4.39074	4.78301	0.00018025	0.00854991
Mettl27	3.52267	0.941363	1.05176	4.78878	4.47718	0.986621	0	4.6211	4.91155	4.48843	0.000181008	0.00855431
Kazald1	2.79251	4.19531	0	4.73655	4.50448	0	1.32997	3.77896	4.92052	4.5435	0.000181199	0.00855431
Atp8a1	2.29908	-0.0766332	3.36305	-0.0673441	0.582926	-0.649601	3.2705	-1.91275	5.0327	4.43939	0.000181504	0.00855431
Adcy3	4.40054	2.50864	1.00503	0	0	0	0	1.45132	4.51056	4.6839	0.00018213	0.00856555
Tnnt2	-3.92077	-5.18196	-3.22773	0.239381	-4.30496	-1.32826	-5.18196	-0.032758	5.16354	4.48289	0.000183306	0.00858679
Vwa5b2	0	3.31738	4.5285	0	0	1.27269	1.55341	0	4.57872	4.68068	0.000183359	0.00858679
Csrnp3	1.24875	4.19848	4.51892	0	0	3.66748	4.17861	1.32367	4.83682	4.53584	0.000184304	0.00861281
Clhc1	0	0	1.04917	0	3.59791	0	0	0	4.37107	4.8854	0.00018508	0.0086297
Aldh3a1	1.34858	1.66816	3.15153	0	0	0.977998	4.51213	0	4.56002	4.59796	0.000185446	0.0086297
Tgfbrap1	-2.79331	-2.79331	-1.74866	1.32568	-2.79331	-2.79331	-1.28518	-1.6064	4.48925	4.59369	0.000187162	0.00867406
Pkd1	0.230049	-0.803644	-1.66185	-4.3981	-0.0399861	-4.15308	-5.89962	-5.89962	5.67769	4.47353	0.000187256	0.00867406
Numb	-6.18202	-1.29287	-6.18202	-4.99915	-1.03994	-3.77525	-1.43446	-1.21191	5.47494	4.47277	0.000187577	0.00867406
Nxpe4	0	0	3.79351	1.16548	0.861462	3.89949	1.50823	0	4.53623	4.59151	0.000188044	0.00867751
Lrrcc1	3.289	2.90398	-1.51071	0.00795517	-0.268102	-0.435507	-1.51071	1.84669	4.78849	4.4684	0.000189454	0.00872438
Nrip1	4.33414	5.0342	1.01618	1.17843	1.32246	5.55431	3.57577	2.33701	5.12229	4.41984	0.000189957	0.00872935
Tgif1	-1.15097	-1.15097	-0.145869	0.3767	0.202151	3.28041	1.23521	-1.15097	4.54227	4.51828	0.000191635	0.00877197
Gpcpd1	3.94096	4.7213	5.10912	0	0.875164	1.26328	4.60048	0	5.01897	4.51818	0.000191678	0.00877197
Dlg2	-1.90718	-4.57457	-5.14724	-4.1813	-5.50806	-0.459532	-0.592567	-1.02831	6.96148	4.37175	0.000193062	0.00879926
Arfgap3	-4.81265	0.157328	-3.4978	-1.03501	0.276804	-2.0615	-4.81265	-1.19885	5.1359	4.4601	0.000193071	0.00879926
Csf2ra	-1.91409	2.37124	2.39379	1.85681	-1.91409	2.71244	-0.430649	3.78995	5.18203	4.45799	0.000194	0.00882341
Meis3	-4.58049	-3.63724	0.910474	-2.2826	0.0252859	-0.240435	-4.58049	-3.25462	5.12203	4.45628	0.000194761	0.00882348
Tex26	0	0	3.2507	0	0	1.07188	4.13563	0	4.4961	4.74423	0.0001948	0.00882348
Plekha4	0	1.18731	3.05303	0	4.66206	0	0	0	4.55352	4.7362	0.000197959	0.00894822
Nol8	-2.80858	-1.62788	1.86166	-1.63252	0.230398	-1.51213	0.678013	2.34605	4.92108	4.40084	0.000198552	0.00895674
Zfp612	4.88635	2.97272	0	2.67119	5.23765	2.00726	0	4.6245	5.04247	4.4978	0.000200555	0.0090232
Tmem131l	-3.78216	-2.31991	-3.78216	-3.78216	-0.882166	-3.78216	0.620571	-3.78216	4.60787	4.637	0.000200842	0.0090232
Morn1	-3.29851	-3.37391	-4.5613	-4.5613	-3.22105	-2.76711	-4.5613	-3.11001	4.54707	4.49421	0.000202162	0.00906407
Tcf3	4.38296	5.53881	3.91964	1.64977	3.1667	2.37564	2.76973	-1.45128	5.82966	4.39054	0.000203377	0.00910009
Rfx5	3.48685	-0.237177	2.40038	1.33221	3.83024	-0.466715	3.55662	-1.45572	5.14511	4.38914	0.000204045	0.00911152
Zfp558	0	1.18447	0	0	0	3.90836	0	0	4.40998	4.82321	0.00020843	0.00928857
Kcnh6	0	4.30825	0	0	1.33889	0	0	1.18835	4.46527	4.7078	0.000209569	0.0092988
Pxdc1	-1.45976	-1.45976	-1.45976	-1.45976	-1.45976	2.64574	-1.45976	-1.45976	4.43122	4.81957	0.000209887	0.0092988
Nabp2	-1.93947	-3.84677	-3.84677	1.21191	0.751126	1.05232	0.706381	-1.9628	5.15877	4.4234	0.000209921	0.0092988
Rap1gap	-3.42169	-2.63609	-4.75547	-4.75547	0.383512	0.0774025	1.56477	0.963745	5.59952	4.42103	0.000211058	0.00933046
Gucy1a1	2.45347	0.42374	-2.08699	-2.08699	-0.420528	-1.10904	-2.08699	-0.90004	4.55723	4.46998	0.000213359	0.00940935
Tacc3	-4.67029	-3.7257	-1.80722	-3.21389	-4.67029	-4.67029	-3.34633	-2.32271	4.58632	4.46927	0.000213694	0.00940935
Cbs	-4.2207	-4.2207	-0.14852	-4.2207	-4.2207	-3.14867	-4.2207	-4.2207	4.55814	4.69655	0.000214355	0.00941971
Prtn3	0	0	3.77104	0	0	0	0	1.32339	4.38921	4.80241	0.000216897	0.00948913
Kansl1l	5.11572	1.0089	0.42507	3.65975	0.316229	1.71091	4.14622	3.07034	6.71021	4.32219	0.000217198	0.00948913
Nsun6	3.9347	1.22734	0	0	0.866144	0	0	1.19078	4.42398	4.59947	0.000217223	0.00948913
Pank1	-1.58478	-0.640788	-1.58478	1.81277	-1.58478	-1.58478	2.50516	-0.398106	4.51957	4.52143	0.000218772	0.00953793
Tjp3	3.25269	1.74849	1.00593	4.47647	0	0	2.75547	0	4.59679	4.51747	0.000220651	0.00958247
Mast4	-3.28806	0.813299	1.13105	1.39696	0.997197	-3.32607	-3.21292	-4.54731	5.59244	4.35558	0.00022066	0.00958247
Syt16	-4.03449	-1.02204	-2.70642	-4.03449	-4.03449	-4.03449	-0.00226242	-4.03449	4.59857	4.59072	0.000221235	0.00958858
Xylt2	4.0946	0	0	1.16841	1.67143	1.24142	0	0	4.44841	4.58952	0.000221791	0.00959387
Agtr1a	-4.41811	-1.8814	-4.41811	-4.41811	-1.7227	-3.44038	-4.41811	-4.41811	4.53006	4.58505	0.000223876	0.00965025
Scyl3	3.24075	0	0	0	0	4.22502	1.32343	0	4.5122	4.67473	0.000223968	0.00965025
Slc38a6	-4.67016	-3.73624	-3.09792	-4.67016	-1.74545	-4.67016	-3.34637	-3.19988	4.57135	4.44316	0.000226484	0.00973971
Pigo	0	0.934525	0	1.2866	2.92629	0	0	4.01217	4.46976	4.57647	0.000227932	0.00975471
Pcbp3	-3.02199	-0.611138	-5.80018	-0.00585896	-2.86203	-2.95629	-6.82871	-2.07884	6.07646	4.34156	0.000227998	0.00975471
Grin2d	0	3.74809	0	0	0	0	3.29837	0	4.45615	4.775	0.000228607	0.00975471
Cp	-1.96083	-1.01047	2.04298	-1.96083	2.21577	2.7989	1.22456	-1.96083	4.83015	4.43869	0.000228755	0.00975471
Ggps1	0.676623	3.42405	-0.109805	2.75792	-0.289671	0.0695545	-1.1592	3.13254	4.77009	4.33894	0.000229395	0.00975471
Carmil1	4.53136	4.78763	1.0506	0	3.85993	1.07564	1.50361	1.19544	4.82174	4.38397	0.000229696	0.00975471
Pde4d	-3.44682	-3.13139	-4.79213	-3.62217	-3.92552	-0.789129	-2.37327	-2.69733	4.7133	4.33728	0.000230289	0.00975471
Clcn2	-1.24765	0.467683	-3.12462	0.930338	1.5806	-3.49524	-2.46728	1.94767	5.89206	4.29746	0.000230364	0.00975471
Smc2	0	1.74829	4.23809	3.30179	0	1.07252	3.50869	0	4.60986	4.49666	0.000230819	0.00975532
Arhgap10	1.138	2.98414	2.21414	0	4.21807	3.78569	0	0	4.62688	4.49307	0.000232622	0.00980114
Herc4	1.90609	3.22063	1.32352	1.45433	2.07925	5.15225	0	0	4.70689	4.43084	0.00023279	0.00980114
Spata2	1.26362	4.18276	1.57181	1.28607	3.42297	0.977875	0	0	4.55344	4.4292	0.00023364	0.00981821
Apol8	-3.56573	-3.56573	-3.56573	-3.56573	-3.56573	-3.56573	-3.56573	-3.56573	4.35281	4.89978	0.00023489	0.00985202
Cntrl	2.86646	2.74613	-0.146011	-1.15149	-1.15149	-1.15149	0.944613	-1.15149	4.56814	4.48721	0.000235589	0.00986261
Cep55	0	3.74029	0	0	0	0	0	0	4.37994	4.89365	0.000237518	0.00992459
Trim59	1.14093	0	3.43095	0	0	0	0	0	4.3579	4.75208	0.000238895	0.00996328
Nt5c3b	-1.15228	-0.207455	-1.15228	-1.15228	1.15357	2.59873	-1.15228	3.36345	4.60308	4.47394	0.000242466	0.0100807
Snx10	-1.39678	3.62599	4.66406	-0.103581	2.71086	3.23879	3.83114	0.064279	5.41926	4.31494	0.000242623	0.0100807
Slc39a11	0	3.41066	4.10869	0	0	1.24325	0	0	4.5122	4.63135	0.00024441	0.0101359
St6gal2	0	4.48697	0	1.1655	2.59119	1.24321	1.32348	1.32125	4.54609	4.40472	0.000246754	0.0102056
Gmfg	0	1.94736	4.62605	1.28623	0.862052	2.15307	1.50796	0	4.57084	4.40363	0.000247353	0.0102056
N4bp2	-3.89409	-3.63323	-5.6384	-1.45987	-0.472292	-5.6384	-2.10163	-1.76703	5.15559	4.35087	0.000247749	0.0102056
Ptprt	0.427516	-0.121065	-1.39348	-1.39348	-0.0986539	-1.39348	-0.0511093	3.05718	4.52356	4.40257	0.000247937	0.0102056
Prss23	-0.155403	0.00515366	0.561334	-4.3891	-4.3891	-3.40179	-2.84498	-4.3891	4.96745	4.40098	0.000248818	0.0102228
Cln3	0.0874106	-0.211058	2.21986	2.46195	3.13001	-1.16136	-1.16136	3.70703	4.82626	4.34781	0.000249488	0.0102313
Arhgef7	3.53278	0	1.95824	0	4.70999	4.37403	1.50282	4.35998	4.90046	4.39366	0.000252916	0.0103527
Pced1b	3.84153	0.947654	0	1.17059	0	0	0	0	4.40147	4.61244	0.000253916	0.0103605
Sugp2	1.26353	0.934016	0	0	1.24771	4.19309	1.34609	1.18737	4.4808	4.39139	0.000254201	0.0103605
Tcte3	0	2.99562	2.27551	1.74314	1.69156	0	4.8801	0	4.62525	4.45157	0.000254513	0.0103605
Spata2l	-1.90296	2.12827	1.65275	-1.90296	-1.90296	-1.90296	-0.557202	-0.716243	4.53828	4.44772	0.000256653	0.010424
Rgs8	-4.43101	-3.24362	-4.43101	-4.43101	-1.73449	-2.92432	-3.10754	-3.10977	4.53787	4.38646	0.000257015	0.010424
Lyrm7	0	0	1.04752	0	3.79375	2.15857	0	0	4.41785	4.60442	0.00025806	0.0104472
Klhl8	2.78866	-0.572831	-1.51693	-1.51693	-1.51693	-1.51693	2.15125	-1.51693	4.55181	4.51267	0.000260554	0.0105289
Bivm	0	4.25915	1.00504	1.97365	0	0.977698	2.10083	1.18666	4.511	4.37701	0.000262493	0.0105689
Nfrkb	-1.15085	-1.15085	-1.15085	0.360699	3.19905	0.0817266	0.357432	-1.15085	4.50106	4.43733	0.000262501	0.0105689
Misp	3.9465	0	1.0474	0	0	0	1.50604	0	4.42216	4.59438	0.000263342	0.0105835
Prdm16	0	0	0	0	4.46803	4.11363	0	0	4.59584	4.69996	0.000264109	0.010595
Asb1	2.62822	-1.39706	-0.0507895	1.92966	-0.535661	-1.39706	-1.39706	-1.39706	4.5128	4.43262	0.0002652	0.0106195
Osbpl1a	-1.45651	2.10623	-0.404077	-0.165519	2.71126	3.18893	3.81586	-1.45651	4.98063	4.31584	0.000268425	0.0107292
Atxn1	-0.268208	-1.62213	1.17377	-2.56241	-0.552798	2.74726	-1.23424	-0.149283	4.83212	4.27004	0.000269479	0.0107519
Dhx57	-2.30313	0.808973	-2.30313	-1.13764	1.83227	-2.30313	-2.30313	-0.981886	4.54101	4.42345	0.000270538	0.0107747
Mmaa	0.390285	3.12365	0.0561621	-1.51638	-0.268767	-1.51638	-0.00856427	-0.328876	4.58568	4.30941	0.000272407	0.0108123
Zfp932	-1.51581	-1.51581	-1.51581	-0.229148	0.790779	2.63306	-1.51581	2.63941	4.61252	4.42019	0.00027246	0.0108123
Mob3b	2.35544	0.419474	0.519453	-1.90757	2.9963	-1.90757	-1.90757	-1.90757	4.73837	4.41767	0.000273952	0.010852
Gcnt1	-3.10477	-3.10477	0.618126	-3.10477	-3.10477	-3.10477	-3.10477	-3.10477	4.43268	4.6769	0.00027612	0.0109183
Htr7	0	0	3.68851	0	0	0	0	1.3235	4.38155	4.67366	0.000277852	0.0109672
Otof	1.50646	2.14551	-1.43789	-2.49072	2.69885	1.9039	-2.49072	-2.49072	5.0274	4.35034	0.000278615	0.0109758
Armt1	-3.09954	-3.09954	-2.05426	-3.09954	-2.23681	0.761509	-3.09954	-1.77789	4.47334	4.40917	0.000279063	0.0109758
Cers4	1.77136	1.30751	-2.86116	-0.718772	-0.64135	0.608204	-4.18906	-4.18906	5.41099	4.29548	0.00028124	0.0110242
Adcy9	-4.49376	-0.644588	-4.49376	-0.790139	-4.49376	-2.61628	-2.3809	-4.49376	4.69943	4.40551	0.000281291	0.0110242
Pgghg	0	0	1.04924	0	0	3.53576	0	0	4.36897	4.66304	0.000283615	0.0110895
Nrcam	-5.36081	0.385134	-1.41034	-6.51755	0.215486	0.482003	0.587737	-5.0883	6.65552	4.24768	0.00028396	0.0110895
Lrch2	0	2.83554	5.63795	1.75209	1.24211	3.70429	0	1.62768	4.80799	4.33988	0.000285206	0.0110992
Kif20b	0	0	0	1.17233	0.869334	0	0	3.57687	4.368	4.55447	0.000285477	0.0110992
Ccdc68	0	0.933934	1.0449	3.1297	0.862092	0	0	4.011	4.48271	4.39833	0.000285715	0.0110992
Scml4	-3.52742	-3.52742	-2.4778	-3.52742	-3.52742	-3.52742	-3.52742	-3.52742	4.35879	4.65762	0.0002866	0.0111017
Peli1	3.60953	3.25691	0	0	3.09213	0	0	0	4.5123	4.55222	0.000286784	0.0111017
Slc25a38	2.94848	0.309814	-1.15192	-1.15192	1.54482	-1.15192	-1.15192	-1.15192	4.47802	4.46157	0.000290105	0.0112003
Zkscan17	0	0	3.34736	3.22826	0	4.40327	2.11276	1.32206	4.63453	4.38983	0.000291049	0.0112003
Sgk1	-1.91044	-0.0650412	-1.91044	2.26527	2.55631	-1.91044	1.79065	2.37361	4.8437	4.32903	0.000292211	0.0112003
Gm11419	0	0	3.57096	0	0	0	0	0	4.35927	4.77943	0.000292435	0.0112003
Arhgef3	0.867566	-3.46956	0.841145	-3.46956	-3.46956	-1.58385	-0.947382	1.24947	4.88392	4.32857	0.000292511	0.0112003
Sh2b3	-3.63021	-1.29469	-0.839466	-4.77036	-1.79025	-4.77036	-4.77036	-3.44696	4.7444	4.32824	0.000292727	0.0112003
Sema4c	0.286994	-4.19027	-3.14113	-4.19027	-0.16311	-4.19027	-2.71827	-1.75737	4.76108	4.32801	0.000292879	0.0112003
Cfap97	-4.28852	-1.74946	-4.28852	-4.28852	-4.28852	-4.28852	-4.28852	-4.28852	4.46464	4.64398	0.000294256	0.0112207
Ralgps1	-0.0873959	0.671428	1.39962	-3.90587	-5.39237	-0.104737	-2.13669	-4.18172	5.89775	4.23222	0.000294427	0.0112207
Zfp280c	0	0	0	1.17229	3.47839	0.983543	0	0	4.36863	4.53251	0.000298464	0.0113387
Lyz2	-0.308544	1.84765	3.99683	0.273684	1.189	1.06534	0.596517	1.0147	4.92434	4.1887	0.000298549	0.0113387
Pdcd2l	1.1421	0	1.3265	0	0	0	0	4.32932	4.45181	4.52948	0.000300299	0.0113856
Mpp7	2.71285	3.33335	2.60417	-1.45659	3.43222	-1.45659	-1.45659	-1.45659	4.96702	4.37336	0.000301668	0.0114179
Slc35d1	4.29479	0	1.32875	0	1.12794	0.978016	3.08536	2.5214	4.56104	4.31294	0.000302929	0.0114461
Sfmbt1	-0.566714	-2.31871	-1.76929	-3.58885	-1.66586	-3.58885	1.50108	-2.12199	4.75886	4.25697	0.0003072	0.0115876
Rad51d	0	0	3.72499	0	0	0	1.34833	1.44909	4.40097	4.51399	0.00030988	0.0116688
Mapk12	0	0	0	0	2.66277	0	0	3.67508	4.40886	4.61632	0.000310447	0.0116703
Alkbh4	-0.0156144	3.52565	-1.1539	0.133219	2.67037	0.0877922	-1.1539	0.0353165	4.64286	4.24909	0.000312801	0.0117043
Zfp853	0	3.07643	3.98763	0	0	0	0	0	4.46504	4.61168	0.000313248	0.0117043
Pak3	1.24926	1.22787	4.95273	2.24942	0	2.57818	1.50637	2.45352	4.67994	4.24829	0.000313378	0.0117043
Mcoln3	3.51594	0	1.57703	2.65845	1.9245	0	5.00718	2.69107	4.71883	4.29766	0.00031347	0.0117043
Fam160a2	5.56848	5.7613	3.60588	5.02805	4.88312	0	6.2648	1.45741	5.70843	4.2435	0.00031684	0.0118102
Dnm2	2.6831	2.35703	0.66052	0.521312	-2.82552	0.208875	-1.43978	-1.73011	5.76323	4.16279	0.000317609	0.0118189
Metap1d	-3.80923	-2.86522	0.178495	-2.29311	-3.80923	-3.80923	-3.80923	-3.80923	4.52958	4.41772	0.000318185	0.0118204
Ints10	1.83296	-2.41945	-0.411978	-1.90568	-3.35824	-1.37903	-2.00898	-2.03445	4.76975	4.19624	0.000320333	0.0118803
Ppp4r4	1.34803	0	0	1.83409	0	0	4.45557	0	4.47506	4.49335	0.000323138	0.0119642
Kctd15	0	3.3262	0	0	0	0	1.34945	0	4.35801	4.59273	0.000324975	0.0120025
Pym1	4.36304	1.27658	0	0	3.89369	1.23159	0	2.20017	4.61991	4.3376	0.000326101	0.0120025
Ablim1	0.0940911	-0.208596	3.40796	0.132427	2.5383	2.09937	-1.15516	0.0351234	4.68247	4.18839	0.000326283	0.0120025
Akna	-1.39706	2.85392	2.64937	-1.39706	2.00907	-1.39706	0.0759391	-1.39706	4.66565	4.33726	0.000326345	0.0120025
Syt3	3.74555	4.91848	4.11315	0	2.26796	0	2.24286	0	4.80581	4.33532	0.00032773	0.012016
Snap47	0.280372	0.577554	2.15512	0.34357	1.66492	0.0785627	4.2262	0.0343912	4.78689	4.14957	0.000327799	0.012016
Safb2	4.00632	0	1.61271	3.57623	3.21257	5.37747	1.48459	3.35228	4.93351	4.22738	0.00032879	0.0120324
Mapk14	-3.10414	1.98455	1.74703	-0.022209	-0.128641	-3.10414	-1.63358	0.837152	5.00055	4.22594	0.00032988	0.0120519
Mrps17	-3.6122	-1.76425	-0.57804	0.485279	-3.62861	-0.647039	-4.95074	-4.95074	5.14154	4.22523	0.000330414	0.0120519
Ankrd26	0	4.43384	1.81905	3.35374	2.25792	5.05411	1.32914	1.46535	4.84366	4.22391	0.000331416	0.0120685
Prr36	-3.71405	-1.14867	-3.5491	-0.511057	-4.86241	0.251977	-3.52992	0.810517	5.26871	4.18012	0.000332667	0.0120942
Senp1	-0.197696	-1.46133	1.46607	-0.295828	-1.46133	2.88023	-0.137854	-1.46133	4.54794	4.26923	0.000334093	0.0121261
Smarcd3	0	0	2.61348	1.52494	0.864154	1.71436	3.32274	4.72878	4.63775	4.2676	0.000335315	0.0121505
Lkaaear1	0	3.21695	4.53822	0	3.01569	3.62	0	0	4.68051	4.39135	0.000336401	0.0121699
Nckap5l	-0.693885	0.362997	-3.70729	-3.70729	-3.70729	-3.70729	-3.70729	-0.713797	4.6204	4.38854	0.000338401	0.0122222
Tmtc3	-4.70151	-1.00695	-2.07724	-0.836352	-4.70151	-4.70151	-0.633881	-4.70151	4.829	4.31599	0.000341841	0.0123264
Slc7a7	0	0	1.93574	0	0	0	0	3.77001	4.40175	4.56572	0.000342468	0.0123288
Edrf1	-1.15493	1.36037	-1.15493	3.82546	-0.0268532	2.39513	-1.15493	0.482879	4.67435	4.25126	0.000347837	0.0125018
Slc26a4	-3.03249	-4.17317	-4.17317	-0.626046	-4.17317	-4.17317	-4.17317	-4.17317	4.51231	4.45313	0.00035067	0.0125831
Gm5820	3.36875	0	2.2112	0	0	0	4.06428	2.07863	4.53684	4.37051	0.000351541	0.012594
Ptpro	3.97841	1.22921	1.0069	0	4.33973	2.15537	1.55213	0	4.63046	4.24393	0.000353602	0.0126102
Fchsd2	-3.95624	-3.95624	-2.94787	-3.95624	-2.82815	-2.88268	-2.48343	-3.95624	4.4312	4.30041	0.000353662	0.0126102
Ppfibp2	4.12691	0	0	0	0	0	0	0	4.41252	4.67546	0.000353868	0.0126102
Tiam1	-3.84767	0.116283	-4.17041	-5.18648	-3.4957	-0.638323	-3.03692	-1.59944	5.10884	4.1533	0.000354277	0.0126102
Kcnc2	0.841213	0.029106	-0.14716	0.351502	2.43721	0.0746086	3.93232	-1.15574	4.70364	4.15072	0.000356432	0.0126466
Ankrd44	-3.98798	-3.98798	-0.711224	-3.98798	-2.86006	-3.98798	-2.00888	-3.98798	4.4986	4.36352	0.000356772	0.0126466
Iho1	0	4.42902	3.61279	3.63812	0	0.98063	1.34746	1.56807	4.67471	4.23965	0.000357015	0.0126466
Sema4b	-2.28953	0.784706	-3.553	-2.38656	-1.63077	-3.553	-1.42297	-3.553	4.5956	4.23522	0.000360583	0.0127525
Dnaic2	2.77028	0	0	0	0.865577	0	3.86992	0	4.43877	4.43193	0.000366142	0.0129143
Grhl1	0	0	0	0	2.78658	0	1.32461	4.01295	4.46215	4.42964	0.000367851	0.0129143
Kat7	4.25104	6.15	6.33866	1.29572	4.17706	5.84489	4.84725	2.16916	5.80249	4.13721	0.000367921	0.0129143
Slc35d2	1.13693	3.41887	1.0051	0	1.35312	0	0	4.30035	4.54263	4.28215	0.000368051	0.0129143
Kdm2b	-0.57401	0.793459	0.749585	-2.31761	3.01648	0.173228	-2.31761	-0.870088	4.82048	4.17826	0.000368079	0.0129143
Adamts6	0.753905	2.71748	-1.1552	-1.1552	-1.1552	-1.1552	-1.1552	0.167362	4.43774	4.34573	0.000370457	0.0129772
Dis3l2	1.99638	3.7383	3.50291	4.76208	0.866878	0	1.32638	0	4.71799	4.21761	0.000375126	0.0131199
Zfp329	-2.4229	-3.56332	-3.56332	-2.39138	-2.69443	-3.56332	-3.56332	-3.56332	4.37603	4.3318	0.000381547	0.0132869
Slc38a9	-1.45958	-0.512524	-1.45958	-1.45958	-1.45958	-0.478202	-1.45958	2.50134	4.4192	4.33176	0.000381574	0.0132869
Gramd4	-2.82515	-3.9663	-3.9663	-2.13239	-0.0571308	-3.9663	-1.1467	-3.9663	4.58771	4.26548	0.000381705	0.0132869
Acsl6	-2.91702	1.16442	0.556907	-2.91702	-1.26927	-2.91702	-2.91702	-1.59553	4.57969	4.26406	0.000382898	0.0133075
Trmt1	4.86381	0	4.98859	3.91725	0	0	4.03619	4.5995	5.08043	4.26203	0.000384599	0.0133311
Tbc1d24	0	3.62576	3.68148	0	0	0	0	0	4.47364	4.50588	0.000384782	0.0133311
Anks1	0.381909	2.59987	-0.406429	1.05478	-0.329171	-1.45742	3.35394	2.99555	4.84937	4.11495	0.000387675	0.0133679
Borcs8	-1.39706	1.77615	3.17089	-1.39706	1.62358	-1.39706	0.0763151	-0.208536	4.62172	4.20224	0.000388312	0.0133679
Csmd2	4.51687	0	0	0	2.30343	0	2.24665	0	4.52011	4.40229	0.000388948	0.0133679
Cd36	0	0	3.50661	0	0.869873	0	0	0	4.35944	4.50006	0.000389172	0.0133679
Fam76b	-0.496621	-2.94029	-1.43184	-4.63676	0.517371	-4.63676	0.755785	-3.4366	5.16514	4.15384	0.000389347	0.0133679
Tasp1	3.98856	0.0301631	2.77496	3.78246	4.21276	-0.464017	-0.101435	0.963022	5.33188	4.07748	0.000389475	0.0133679
Srgn	0	0	3.68804	0	0	0	1.54882	0	4.38971	4.49838	0.000390451	0.0133807
Mapk4	-1.15088	2.9194	-1.15088	2.33799	-1.15088	-0.173183	-1.15088	-1.15088	4.51037	4.31931	0.000391774	0.0134052
Tyw5	1.13689	0	4.12654	1.51616	3.10359	0	1.32343	0	4.51344	4.24969	0.000395116	0.0134987
Flcn	0.670997	-0.218996	3.72369	0.132341	-0.0272162	2.67964	-1.1553	0.719253	4.68733	4.10598	0.000395926	0.0135055
Rhbdl3	1.24958	3.31635	3.98516	0	0.861343	0	0	0	4.49596	4.31284	0.000397181	0.0135274
Cwc27	3.05893	-0.394776	-0.533052	-1.57999	0.5792	-0.599286	-1.57999	2.59226	4.67834	4.14342	0.000398805	0.0135618
Crlf1	1.82645	3.28996	4.60526	0	4.0874	1.24067	0	0	4.707	4.24221	0.000401641	0.0136373
Atp11c	1.82441	3.70037	1.32109	2.12278	5.00763	0	0	3.46613	4.76156	4.18221	0.000406196	0.0137708
Tmem125	0.589229	-1.39515	-1.02657	-4.06076	-1.41736	-4.06076	-4.06076	-4.06076	4.73344	4.23582	0.000407296	0.0137869
Sgip1	0.00853108	-1.65848	-2.41487	-3.1362	-1.34595	-6.99905	-6.99905	-3.69771	6.1363	4.13214	0.000409303	0.0138337
Dnah17	0	0	0	0	0	0	3.5389	0	4.35393	4.59163	0.00041307	0.0138959
Col6a4	0	0	0	0	0	0	3.53875	0	4.35392	4.59126	0.000413353	0.0138959
Cpsf1	0	4.35873	1.01194	0	2.25863	2.78921	3.53027	4.70035	4.7963	4.17359	0.000414156	0.0138959
Cdk8	3.48143	-1.3967	4.4671	4.07034	4.3475	1.86229	-0.0416794	3.05568	5.56676	4.08672	0.000414265	0.0138959
Pml	-1.39706	1.67697	-1.39706	2.811	-0.148869	-1.39706	0.0768389	-1.39706	4.5255	4.22805	0.000414286	0.0138959
Lypd6b	3.8494	0	0	0	3.92739	1.24323	0	0	4.5276	4.36893	0.00041637	0.0139446
Gm12569	0	0	1.4797	4.18795	0	0	3.73416	0	4.53838	4.36813	0.000417052	0.0139463
Crhr1	0	0.946197	4.55263	3.07835	3.67932	1.07323	2.1137	1.18977	4.66215	4.1226	0.000418392	0.01397
Sgms1	5.06159	3.6348	3.63564	3.88221	2.7777	5.15194	-1.17649	0.823505	5.73904	4.08	0.000420865	0.0140178
Plac8	1.14073	1.74109	4.38879	0	2.63552	0	1.48875	1.32126	4.54865	4.16621	0.000421091	0.0140178
Hsf1	-3.91092	2.2794	-0.945446	0.384353	0.00685605	0.16368	-1.90407	-3.91092	5.24446	4.11369	0.00042707	0.0141781
Nr2f1	-1.46136	0.647923	3.08895	-1.46136	0.38034	-1.46136	-1.46136	-1.46136	4.52048	4.2785	0.00042719	0.0141781
Tspan4	2.36509	1.18713	0	1.28619	0	2.16923	1.32373	4.58954	4.56643	4.15773	0.000429197	0.0141977
Dlc1	1.13909	0	3.86833	1.51181	4.01976	1.7949	1.48722	4.08422	4.70038	4.111	0.000429728	0.0141977
Chit1	0	0	3.50706	0	0	0	0	0	4.35428	4.56926	0.000430536	0.0141977
Itgb2	0	0	3.50706	0	0	0	0	0	4.35428	4.56926	0.000430536	0.0141977
Chd1l	-1.95658	-0.769459	2.0291	-1.95658	-1.95658	2.05381	-1.95658	-1.95658	4.56766	4.27433	0.000430992	0.0141977
Rbck1	-3.82989	-1.28174	2.16243	-1.80622	-1.40637	-1.42106	-3.82989	-0.476526	4.9783	4.10799	0.000432721	0.0142126
Armh3	2.52481	0	1.04745	0	0	3.58576	0	0	4.4205	4.35008	0.00043273	0.0142126
Itgb4	-3.00959	-4.15026	-3.10581	-4.15026	-1.22681	-2.42713	-4.15026	-4.15026	4.50167	4.20745	0.000433407	0.0142137
Pnpla6	5.3584	3.60305	2.58168	-1.57558	3.52588	3.4516	-1.57558	3.94991	5.8364	4.10639	0.000434319	0.0142225
Acsf3	-0.145356	-2.12429	1.58527	-0.952111	-3.06176	0.830363	-3.06176	-3.06176	4.72905	4.14779	0.000438919	0.014332
Recql4	0	0	3.56943	1.17185	1.12818	0	0	0	4.37803	4.3431	0.00043896	0.014332
C2cd5	-1.56033	-1.41008	-5.32698	-6.6303	-3.20721	-0.639569	-5.15169	0.0270876	6.01673	4.06082	0.000440295	0.0143508
Pclo	-6.22763	0.0281514	0.0732484	-1.77409	0.758928	-1.84605	-3.24218	-1.0537	7.41164	4.02383	0.000442873	0.0143508
Arhgef10	1.26143	4.09359	4.80148	4.32513	2.73846	0	0	5.29751	5.04472	4.14369	0.000442984	0.0143508
Atg2a	-1.51678	2.64279	-1.51678	0.316584	-0.268818	-1.51678	-0.00870518	1.77119	4.56007	4.14369	0.000442989	0.0143508
Cflar	3.6294	0.944519	4.23437	0	0	0.978343	0	2.46837	4.58052	4.19746	0.000442997	0.0143508
Atxn3	-3.87284	-1.85641	-3.81196	-3.29883	-5.1358	-3.31533	-3.80998	-3.94528	4.69237	4.0578	0.000443431	0.0143508
Slc5a10	3.64705	0	0	0	0	0	0	0	4.36821	4.55184	0.000444667	0.0143698
Nlgn4l	0	3.47545	0	0	0	0	0	0	4.35618	4.54964	0.00044649	0.0144076
Lrrc4c	-1.15331	1.53791	-1.15331	3.64011	-1.15331	0.867371	1.0641	1.29772	4.62732	4.13809	0.000448606	0.0144448
Cast	0.277098	3.82553	3.49929	2.15766	2.73667	1.99544	-1.56153	4.51484	5.44916	4.05255	0.00044895	0.0144448
Ccdc85c	-0.610609	-0.187757	-2.51883	-1.2291	-0.827737	0.633287	2.74399	0.998979	4.80977	4.05055	0.000451068	0.0144816
Slc1a2	1.14331	1.2265	0	0	0	0	3.83805	0	4.40441	4.32899	0.000451822	0.0144816
Grin1	0	4.26813	5.05692	4.02017	3.6053	0	0	3.06858	4.91729	4.18823	0.000452058	0.0144816
Zfp827	-1.9892	-1.20242	1.13628	-4.0575	2.08136	1.13166	-1.03461	1.62213	5.6108	4.04878	0.000452948	0.0144891
Fstl5	1.3169	-3.40377	1.32748	-3.40377	-2.11841	-0.136813	-2.05207	1.51712	5.02144	4.08313	0.000458249	0.0146375
Cep152	1.13689	0	0	3.9927	0	3.4451	1.50827	0	4.50889	4.24265	0.000461003	0.0146742
Frmd5	-2.13582	-2.76591	-4.58586	-4.58586	-2.91156	-0.281206	-2.48426	-4.58586	4.71325	4.12569	0.000461316	0.0146742
Acvr2b	-1.46126	2.57157	-1.46126	-1.46126	2.38361	-1.46126	0.0468661	-1.46126	4.55607	4.24108	0.000462538	0.0146742
Cwc22	0	1.22551	4.27243	1.52068	3.82891	4.50767	0	0	4.74535	4.17767	0.000462652	0.0146742
Spi1	0	0	3.40122	0	0	0	0	0	4.34687	4.53041	0.000462718	0.0146742
Nrep	-0.0139938	3.1094	-0.106412	-1.15088	0.788392	0.635104	-1.15088	-1.15088	4.51157	4.1223	0.000464854	0.0147208
Cep128	0	0	3.40973	0	0	0	0	0	4.3476	4.52633	0.00046623	0.014742
Pms1	0	1.27486	4.2888	0	4.20733	0	0	0	4.59422	4.31302	0.000466856	0.014742
Adar	-0.537976	-0.840725	-2.07215	-3.85754	-1.98956	-3.91242	-5.14857	-5.14857	4.9853	4.07434	0.000467631	0.0147454
Ankib1	3.93803	2.94161	3.59101	0	2.61016	0	5.05198	2.09462	4.83096	4.11575	0.000471777	0.0148549
Cep250	-4.39546	-3.45893	-4.39546	-4.39546	-0.190106	-0.642068	-3.0477	-4.39546	4.70045	4.1666	0.000474033	0.0149047
Sox5	-2.9271	-0.0713187	-1.25871	-3.16177	-1.95031	-3.41922	1.6572	-2.1768	5.64926	3.99388	0.000475842	0.0149243
Larp1b	4.7911	1.22596	3.78455	1.52123	1.24421	3.60772	0	0	4.73487	4.11179	0.000476006	0.0149243
Dnajb5	0	4.61318	1.33547	3.62288	3.80707	0	2.11317	4.57258	4.87004	4.10943	0.000478544	0.014968
Vax1	0	0	0	1.17102	1.29244	0	3.73153	0	4.39455	4.30074	0.000478755	0.014968
Clcn4	-5.98883	-0.915475	-2.24767	-0.911599	-2.77925	-1.94389	-5.98883	-5.98883	5.33843	4.10808	0.000479999	0.0149857
Rad51b	1.14154	0	1.32598	0	0	4.23459	0	1.32182	4.46606	4.21801	0.00048581	0.0151247
Hectd4	-4.78566	-1.38877	0.938177	0.085329	0.60331	-0.776371	-5.93803	-1.40564	6.20218	4.01903	0.000485817	0.0151247
Gemin5	-4.83361	-0.62395	-3.81836	0.370565	-3.59408	-1.92825	-1.15377	-4.83361	5.0173	4.05535	0.000488582	0.0151865
Mcur1	0.583075	-1.15093	-1.15093	-1.15093	-1.15093	1.54578	2.90259	1.68709	4.52705	4.15187	0.000489613	0.0151865
Prr14l	0.543561	-0.257034	1.13259	-1.94722	1.76875	2.97685	-3.12648	-1.04937	5.25508	4.01549	0.00048989	0.0151865
Pacs2	-3.53266	0.732329	-3.6605	-1.01378	1.45249	-2.45664	1.36122	1.50588	5.83971	3.98118	0.00049055	0.0151865
Srbd1	-3.56075	-3.56075	-3.56075	-2.39016	-0.958846	-3.56075	-3.56075	-3.56075	4.40166	4.28692	0.000492528	0.0152171
Parp11	-0.380203	1.01954	2.71058	-1.51708	-0.655709	-0.539398	-1.51708	-1.51708	4.50532	4.09583	0.000493452	0.0152171
Arhgap9	0	0	3.86439	1.51438	2.96589	0	0	0	4.46568	4.28585	0.000493607	0.0152171
Pcsk7	-1.16636	2.50963	2.0379	0.125353	4.72891	3.39388	3.10307	0.159565	5.13529	4.00955	0.000496793	0.0152914
Mindy3	-1.66912	3.03108	-1.07303	1.43109	2.39469	1.82816	-1.67222	-1.80288	5.37662	3.9754	0.000497398	0.0152914
Robo2	0.0359952	3.43936	-1.39604	0.625425	2.66323	3.65255	1.20605	1.03773	4.98446	4.00844	0.000498095	0.0152915
Dgki	4.1138	0	0	1.52413	0.861747	1.23184	1.50464	0	4.47046	4.14053	0.000501962	0.0153889
Dtx1	1.91931	0.728808	0.870644	1.94572	-2.89513	-2.89513	-1.56482	-0.600576	4.95802	4.04293	0.000502796	0.0153931
Nckap5	0.373294	2.57104	-1.46087	-1.46087	-0.213513	-1.46087	-0.136696	-1.46087	4.47265	4.13905	0.000503595	0.0153962
Azin2	-4.14951	-4.14951	-1.21057	-4.14951	-3.28793	-1.53456	-4.14951	-1.55944	4.5515	4.135	0.000508096	0.0154947
St6gal1	0	0	3.59642	1.16915	2.9312	1.07349	2.98559	4.73015	4.68581	4.08269	0.000508294	0.0154947
Ctu2	1.14328	0	1.32432	0	0	0	1.32649	3.73498	4.40551	4.19575	0.000509394	0.0154947
Satb2	0	1.18465	1.46958	0	0	0	0	3.85681	4.41641	4.2703	0.000509619	0.0154947
Cenpc1	-3.40734	-2.4688	-1.4403	-3.40734	-3.40734	-3.40734	-3.40734	-3.40734	4.37141	4.26912	0.000510859	0.0155088
Ccdc39	0	3.00978	3.32883	0	0	1.07378	0	0	4.41711	4.26852	0.000511489	0.0155088
Usp28	-3.03973	-1.21349	1.93662	1.35865	-3.05685	-0.77263	0.299156	-2.72361	5.36398	3.96201	0.000513644	0.0155528
Plekha2	0.522676	-2.06247	-1.01659	-2.06247	1.85297	-2.06247	2.12528	-0.612007	4.62568	4.07472	0.000517522	0.0156488
Mlh3	1.34604	3.6302	2.88106	0	0	0	0	0	4.43984	4.25983	0.000520701	0.0157235
Mapk10	2.98422	-2.97172	-0.252002	-4.14469	0.770824	0.680027	0.855908	-0.026032	5.78299	3.98477	0.000526676	0.0158614
Ncald	5.57714	5.9608	6.62547	7.84546	6.96733	6.08386	3.31668	1.33484	6.68865	3.98474	0.000526705	0.0158614
Psd3	1.15659	2.67853	3.77183	-1.50765	0.501415	-0.431396	1.12003	1.55157	4.89858	3.98345	0.000528317	0.0158883
Utp25	3.70662	0	2.57178	0	1.12794	0	0	4.12959	4.56804	4.17745	0.000529651	0.0159068
Scly	0	0	1.00608	4.414	1.54641	1.27228	0	0	4.4725	4.17673	0.000530471	0.0159098
Tspan14	-1.60831	2.31555	-0.600948	-1.60831	2.56476	1.53526	-1.60831	0.162807	4.64798	4.06038	0.000534558	0.0160045
Arhgef28	-1.51095	3.48166	0.67319	1.54848	2.49781	0.267367	-1.51095	-0.187015	4.78076	4.016	0.000535076	0.0160045
Cdh12	0	1.81843	1.60534	2.61239	0	4.60091	1.34547	3.67195	4.65282	4.05306	0.000543463	0.0162334
Plekhh2	0	3.42116	0	0	0	0	0	0	4.35193	4.44248	0.000545062	0.016254
Adamtsl4	4.28365	3.11301	3.99727	0	0	3.41671	0	0	4.69848	4.16352	0.000545624	0.016254
Sgsm3	3.77345	3.57589	0.325284	4.0161	3.78035	3.25587	-2.22765	2.55243	5.99193	3.96829	0.000547543	0.0162892
Bcan	-2.06159	1.49278	-2.06159	-2.06159	-1.19392	-2.06159	-2.06159	-2.06159	4.39665	4.23132	0.000552144	0.016404
D3Ertd751e	4.1001	3.50452	3.22463	-1.16521	2.04441	-0.0881515	-1.16521	2.61355	5.03893	4.00006	0.000555154	0.0164713
Camk2g	7.38952	6.66459	3.78041	1.87811	5.7007	7.72488	6.61318	6.33346	6.84085	3.95973	0.000558713	0.0165547
Pxk	6.86373	4.32627	3.7458	4.0102	2.96261	3.37752	4.94523	0	5.53553	3.99659	0.000559622	0.0165594
Gm11476	-3.31713	-0.322671	-5.05882	0.442326	-1.63629	-1.80526	-2.00302	-5.05882	5.17452	3.99112	0.000566753	0.016742
Mfap4	-1.51023	1.20566	3.55701	0.919712	-1.51023	2.61004	-0.160337	1.3324	4.80496	3.9907	0.000567307	0.016742
Pbx3	1.14692	4.24255	2.3015	5.04555	2.9648	3.43043	0	4.86173	5.0194	3.98933	0.0005691	0.0167725
Usp40	2.44401	0	0	0	4.11242	0	1.34602	1.87149	4.48306	4.14266	0.000570467	0.0167904
Elane	0	0	3.40544	0	0	0	0	0	4.34638	4.41565	0.000573105	0.0168009
Rhobtb1	0	0	3.40544	0	0	0	0	0	4.34638	4.41565	0.000573105	0.0168009
Sell	0	0	3.40544	0	0	0	0	0	4.34638	4.41565	0.000573105	0.0168009
Palb2	1.14398	0.94845	0	0	0	0	3.66069	0	4.38097	4.2116	0.000575034	0.0168352
Ankrd42	-1.51548	2.22312	-0.508769	1.47599	2.55377	-1.51548	-1.51548	0.935361	4.62399	4.027	0.000576437	0.0168444
Spata13	-2.3312	0.530245	-0.779275	-1.73125	-2.25952	2.06367	2.2979	-0.831654	5.27218	3.91365	0.000576873	0.0168444
Shld2	-1.39705	-1.39705	-1.39705	2.49028	-0.268943	-0.323274	-1.39705	-1.39705	4.41727	4.13517	0.000579674	0.0169038
Arel1	1.33538	-1.397	-0.0761027	-0.223132	2.82954	2.54271	-1.397	3.26789	4.80783	3.98043	0.000580937	0.0169183
Cdc25a	-2.85505	-2.81386	-0.680871	-1.27625	-3.99626	0.91345	-2.64655	-1.85581	4.79419	3.94219	0.000582318	0.0169192
Med7	-1.16858	-2.64798	-0.250865	-5.49182	-1.10844	-4.41404	-5.49182	-2.26771	5.19531	3.97927	0.000582498	0.0169192
Mospd1	0	0	1.32549	0	2.13538	0	3.99114	0	4.4353	4.20329	0.000584963	0.0169469
Lrif1	3.40333	4.87048	1.05107	0	3.60318	1.29772	0	4.51076	4.85474	4.01957	0.000586209	0.0169469
Zfyve19	3.07593	3.42231	3.34003	-2.08037	0.77804	1.08428	3.34506	-2.08037	5.42258	3.97641	0.000586371	0.0169469
Rimklb	4.2672	2.81071	1.34194	1.28772	0	4.4008	1.50618	0	4.69497	4.01917	0.000586736	0.0169469
Casc1	-1.1579	2.43098	0.44977	-1.1579	-1.1579	-1.1579	-1.1579	-1.1579	4.38902	4.20137	0.000587285	0.0169469
Cldn12	0	3.41537	0	3.17496	3.55998	4.66132	0	2.07899	4.73126	4.06641	0.000590865	0.017028
Fnbp1	3.0835	4.44552	0	1.16713	3.09304	0	2.11273	0	4.61687	4.06418	0.000593782	0.0170898
Macir	0.797753	-3.80859	-0.305949	-2.63906	-2.68049	-2.8274	-2.46081	-2.61784	4.70263	3.9295	0.000600026	0.017247
3110082I17Rik	0	2.3159	1.95845	4.47598	1.74579	0.977756	0	1.18672	4.53994	4.00847	0.000601106	0.0172556
Maff	0	1.66032	0	0	0	3.76738	3.4224	0	4.48321	4.18944	0.000601907	0.0172562
Sez6	3.81766	1.18262	1.3217	0	1.72704	4.44265	4.443	2.16715	4.78459	3.96381	0.000603719	0.0172858
Ahcyl2	3.36319	2.19938	1.50611	1.6975	0.885891	2.48731	-2.57608	4.13919	5.76637	3.92539	0.00060588	0.017305
Stra6	2.00202	0	4.1644	0	2.92723	0.979239	0	3.95865	4.6199	4.05442	0.00060669	0.017305
Slc9b2	-3.45846	-0.140162	-3.45846	-3.45846	-3.45846	-2.15395	-3.45846	-3.45846	4.44396	4.18524	0.00060714	0.017305
Bbof1	1.14281	3.77169	1.54648	0	0	0	0	1.87485	4.4259	4.11289	0.000607942	0.017305
Paxx	-0.154206	1.41838	0.857077	-2.62658	2.05465	2.1303	-2.38433	-2.47851	5.62407	3.89157	0.000608305	0.017305
Zmynd10	-1.90584	-0.678009	1.91005	-1.90584	-1.90584	-0.675218	-1.90584	-0.715585	4.43974	4.05166	0.000610392	0.017342
Dtx2	0	0	0	3.07034	0	0	3.48288	0	4.41428	4.26627	0.000615921	0.0174766
Gm32547	0	0	1.04631	4.22179	0	0	0	1.4676	4.43878	4.17571	0.000619202	0.0175262
Fam172a	-2.0041	-2.0041	1.95644	0.0206675	-2.0041	0.456254	-0.530699	2.00249	4.61916	3.99509	0.000619586	0.0175262
Mrap2	-3.24485	-3.24485	-3.24485	-3.24485	-3.24485	-3.24485	-3.24485	-3.24485	4.32931	4.37286	0.000620942	0.0175262
Lclat1	-3.10175	-3.10175	-2.09474	-3.10175	-3.10175	0.57475	-1.61385	-3.10175	4.45703	4.1026	0.000621472	0.0175262
Hook3	-2.109	-2.109	1.86649	2.61035	2.87657	2.05509	0.727617	1.44289	5.05771	3.95111	0.000621729	0.0175262
Lef1	0	0	3.2932	0	0	0	0	1.19483	4.34655	4.26096	0.000622425	0.0175262
Uap1	1.13729	0	2.45051	3.98485	0	3.55771	0	2.88148	4.57955	4.04059	0.000625473	0.0175896
Inpp5d	0	0	0	1.17197	0	0	3.59242	1.19318	4.3754	4.16853	0.000628437	0.0176217
Rab36	4.51577	3.24988	-0.112724	0.125419	1.5175	3.23456	0.317454	3.26622	5.12823	3.87782	0.000628737	0.0176217
Grm5	0	1.22405	3.31605	0	0	0	0	0	4.35614	4.25544	0.000629254	0.0176217
Gfm2	-2.6865	1.81614	-0.531737	-3.8344	1.09359	-3.8344	-1.55805	0.885245	5.18851	3.94554	0.000629802	0.0176217
Ldlrad3	1.24933	3.84413	3.96818	0	3.43156	0	2.62844	1.18948	4.65204	3.98633	0.000632005	0.017661
P2rx5	0	0	0	0	3.12225	0	0	0	4.32689	4.36245	0.000633198	0.017672
Phkb	-3.81916	-2.63525	-0.207535	-0.793137	-3.81916	-3.81916	-2.27006	0.796881	4.73569	3.98293	0.000636888	0.0177526
Pigz	0	0	0	0	0	1.26718	0	3.44328	4.36064	4.24513	0.000642224	0.0178414
Nav1	-4.24999	1.62074	0.533192	-2.21701	1.84173	1.3967	-2.76762	2.01119	5.87731	3.90055	0.000642483	0.0178414
Prdm4	-0.527566	-4.26884	-4.26884	-2.4336	-4.26884	-0.971097	-2.94406	-4.26884	4.63094	4.02842	0.000642498	0.0178414
Adck5	-0.92302	1.61069	-0.456526	-2.062	-1.19618	-2.062	-2.062	-2.062	4.43211	4.02709	0.000644385	0.0178714
Mboat7	3.108	2.20683	2.14639	-0.283862	-0.168586	-0.472855	2.61941	-0.262654	4.80971	3.86618	0.000646584	0.0179015
Ptk2b	-0.248739	3.84865	3.82904	0.450775	3.60698	2.94882	1.27673	0.0482208	5.2264	3.86585	0.000647092	0.0179015
Mdga2	0	0	1.57474	1.16822	1.24622	0	0	4.27117	4.45075	4.08182	0.000649729	0.017952
Senp3	2.28939	4.10675	1.54145	1.28597	0.861376	0	0	2.24062	4.5058	3.97286	0.000651577	0.017956
Angel2	4.62582	0.934534	3.02825	1.51007	0	1.27212	1.98022	1.32174	4.60866	3.93061	0.000651963	0.017956
Polk	0	0	0	0	0	1.26806	1.50496	3.48412	4.38181	4.15048	0.000652309	0.017956
Ptchd4	-1.93485	-2.7983	-0.155839	-4.63231	-4.63231	-3.04714	-2.66655	-4.63231	4.72892	3.97029	0.000655378	0.018018
Rbks	3.78289	0.9337	1.04468	0	3.34833	0	1.32361	0	4.48844	4.01812	0.000657274	0.0180477
Tafa2	2.00216	2.5404	4.29274	1.28615	0	0	1.32285	2.52111	4.56209	3.9678	0.000659087	0.0180608
Impa1	-2.84643	0.785712	-1.2442	-1.38994	-2.84643	1.02341	-2.84643	-1.65905	4.57876	3.9676	0.000659386	0.0180608
Ttll7	4.51702	3.92178	0	2.06377	4.50947	2.7558	4.14352	0	4.91625	3.96569	0.000662238	0.0181165
Zfp710	-2.96786	0.842707	-0.266713	-2.96786	-1.67799	-1.89259	0.786996	1.84128	4.79259	3.92216	0.000664852	0.0181506
Adal	0	0.935263	0	3.67008	3.18941	1.27131	0	0	4.45598	4.07088	0.000665129	0.0181506
Pmp22	0	2.28112	2.92344	1.28645	0	4.63783	0	1.57134	4.59804	4.01191	0.000666336	0.0181611
Ache	0	1.18743	1.04448	2.31651	1.69171	0	1.32344	4.30661	4.51636	3.96182	0.000668067	0.0181859
Mme	0	0	0	0	1.93535	0	1.3479	3.84105	4.41876	4.13803	0.000669321	0.0181976
Spag1	3.75272	0	2.51346	1.16956	0	0	0	0	4.42404	4.13347	0.000675655	0.0183473
Lsm10	1.26361	0	3.47737	3.633	0	2.15257	0	0	4.48991	4.06254	0.000677132	0.0183648
Rbm47	0	4.27794	1.94199	1.1654	0	0.977684	0	1.47062	4.4946	4.00352	0.000678802	0.0183777
Flna	-1.16875	-2.41726	2.70933	0.449663	2.39681	0.173252	-2.41726	1.80579	4.99344	3.9129	0.000679269	0.0183777
Slc30a6	2.80357	-0.527114	-1.46109	-1.46109	-0.598934	2.06995	0.0923613	-0.273771	4.57572	3.90959	0.000684493	0.0184744
Pax7	0	0.946909	0	3.56056	0	2.74595	1.34779	0	4.42438	4.05748	0.000684515	0.0184744
Gm4924	4.75933	1.8318	1.3257	0	2.46336	1.30436	3.47439	1.46862	4.6777	3.9052	0.000691506	0.0186403
Tipin	4.27049	5.00769	4.46594	2.02321	1.31852	5.74987	5.02074	1.99824	5.35653	3.86707	0.000695378	0.0187218
Pou2f1	-3.69065	0.296452	0.568919	0.330621	3.02447	1.9399	-0.692901	3.0113	5.93129	3.86586	0.000697375	0.0187528
Ppp1r13l	1.14405	3.47388	0	0	0	0	0	1.32356	4.37763	4.11596	0.000700586	0.0188022
Zfp758	0	3.32775	0	0	0	0	0	0	4.34482	4.30822	0.000701192	0.0188022
Clasrp	5.21121	5.12208	4.57487	5.51414	0	2.40588	5.32447	1.20348	5.43474	3.89884	0.000701767	0.0188022
Clip4	-2.24942	-2.24942	-1.20271	0.0771415	2.30557	1.59088	-0.776423	-2.24942	4.66558	3.93777	0.000705506	0.0188795
Ccser2	-0.821796	0.642045	1.1201	-1.20107	-1.93723	-3.7855	-3.54509	-5.04412	5.47618	3.8595	0.000707937	0.0189217
Rsrc1	2.14882	4.37132	4.06294	0	4.22207	0.983273	0	1.3236	4.75722	3.93291	0.000713324	0.0190426
Focad	-2.50818	-0.887293	-4.42097	-1.09689	-2.69216	-3.34786	-4.42097	-4.42097	4.65159	3.93014	0.000717811	0.0191393
Heatr5a	-0.762729	-0.630449	1.70447	-1.90432	-1.90432	-1.90432	2.43935	0.978852	4.6179	3.92909	0.000719533	0.0191621
Plekhm2	-4.21622	-1.12485	-2.38379	-3.04358	0.242715	-4.21622	-0.363013	-4.21622	4.77374	3.92739	0.000722309	0.0192129
Dxo	-2.00587	3.0411	-2.00587	2.01408	2.70239	0.898256	-2.00587	1.21331	4.95521	3.92577	0.000724963	0.0192603
Tcof1	1.92471	4.42594	1.32749	0	0.861451	2.38033	0	0	4.532	3.97251	0.000726944	0.0192898
Septin8	0	3.49033	4.72442	0	2.60651	2.75064	2.70981	0	4.71285	3.97179	0.000728098	0.0192972
Ccdc171	-1.39706	3.3775	0.796362	-1.39706	-1.39706	-1.39706	1.32259	1.59666	4.62814	3.97111	0.0007292	0.0193033
Ago3	0.292144	1.75879	-2.79197	-0.662933	-2.79197	-1.00488	-1.31873	-2.79197	4.63543	3.9226	0.000730198	0.0193066
Atxn7l3	4.72469	-1.39681	1.58734	2.611	-0.160249	3.02826	3.78394	3.23724	5.36672	3.8456	0.000731603	0.0193206
Prdm10	-0.670468	-0.504031	-4.60122	-3.10069	-2.91054	-4.60122	-4.60122	-0.368097	4.86254	3.91814	0.000737618	0.0194562
Map4k3	-4.10621	0.875399	-4.10621	-4.10621	-1.16109	-0.0677002	-4.10621	-0.327806	4.89982	3.96529	0.00073865	0.0194602
Ano8	-3.47767	-3.27382	-4.72719	-3.56115	-2.59821	-3.65503	-3.17369	-3.40574	4.57303	3.8405	0.000740472	0.0194651
Atg16l2	-0.25385	-1.39705	-1.39705	-1.39705	2.42682	-1.39705	-1.39705	-1.39705	4.40839	4.089	0.000740815	0.0194651
Ids	-1.15826	3.48123	1.46156	0.130487	2.74446	0.636448	-1.15826	2.45571	4.7505	3.87511	0.000741476	0.0194651
Ncoa7	-2.04027	-0.717816	-1.48368	-5.18995	-3.08751	-3.95422	-5.18995	-0.501042	5.04073	3.87437	0.000742743	0.0194655
Clasp1	-0.821109	-0.179929	0.00427581	0.319804	-6.24106	-6.24106	-4.75101	0.552611	6.32573	3.87408	0.000743253	0.0194655
Camk2d	6.11266	4.60084	2.55779	3.59178	6.80574	5.89711	7.79542	3.99056	6.42126	3.83683	0.000746941	0.0195389
Igf2	-2.98157	0.380555	1.40779	3.28016	-0.0709607	1.24035	-0.754185	0.243823	5.25912	3.83523	0.000749765	0.0195896
Coq4	0.731375	1.64233	-0.308352	0.318959	-3.39067	-0.487019	-1.906	-3.39067	4.91936	3.86637	0.000756672	0.0197467
Ptprq	0	0	1.04607	0	0	2.89073	0	4.02154	4.45699	4.07772	0.000758344	0.019767
Slc3a2	-1.32171	1.77024	0.208684	-2.0229	-0.0715902	-1.65474	-2.12287	-3.4736	4.88471	3.82738	0.000763833	0.0198866
D030055H07Rik	0	3.41982	0	0	0	0	1.48613	0	4.36912	4.15476	0.000768333	0.0199784
Sipa1l1	3.50596	4.51148	-1.39664	-1.39664	3.9805	1.78479	4.74692	3.33166	5.6413	3.85931	0.00076917	0.0199784
Armc6	1.13891	2.70538	3.68842	0	0	1.07349	0	0	4.43614	4.00259	0.00077007	0.0199784
Mob3c	-1.87724	-1.74106	-3.01584	-3.01584	0.561261	-0.264396	-3.01584	1.42574	4.66343	3.89678	0.00077427	0.0200638
Trank1	1.01041	1.50654	-0.460943	1.24125	-1.91281	3.61671	-0.581883	3.03551	5.0389	3.81966	0.000777906	0.0201345
Depdc5	1.45319	1.46078	1.04446	0	4.17564	2.02338	0	1.18664	4.50651	3.89369	0.000779718	0.0201578
Cep57l1	0.190138	-1.15559	-1.15559	-1.15559	-0.0274959	0.0748245	-1.15559	2.70053	4.42758	3.94026	0.000780693	0.0201594
Stambpl1	-1.51691	2.25168	-1.51691	-1.51691	-1.51691	-0.243778	2.61527	-1.51691	4.5531	3.99412	0.000784214	0.0202267
Sema6c	-4.49199	-3.17401	-1.95002	-3.8859	-3.23985	-0.577138	0.823887	-0.922015	5.64669	3.78355	0.000788792	0.0203211
Fam110a	-1.91433	-0.813187	1.49426	-2.69652	-0.796829	-0.485888	-4.14602	-4.14602	5.01799	3.84789	0.000789828	0.020324
Scn3a	-1.88833	-3.3277	0.614438	-2.03807	0.438091	-2.34294	1.41183	-1.86179	4.80334	3.81045	0.000795051	0.0203881
Rab3c	1.1403	2.31734	1.83256	1.505	3.49558	3.77745	0	4.8131	4.75098	3.84471	0.000795684	0.0203881
Grb7	2.84007	0	0	0	0	0	3.75404	0	4.43123	4.13696	0.000796032	0.0203881
Klhdc4	1.24957	0	1.04456	0	2.30364	4.20881	3.17622	1.18678	4.54983	3.88439	0.000796348	0.0203881
Cntnap1	0	1.18505	1.80544	3.82102	0	0	1.55069	0	4.43369	3.98631	0.000797483	0.0203881
Golga3	-0.370749	1.61356	3.20448	2.52984	0.718228	-1.5114	-1.5114	1.48819	4.76666	3.84354	0.000797852	0.0203881
Casr	-0.315386	-0.521299	-1.45902	-1.45902	-1.45902	2.0799	-1.45902	-1.45902	4.39384	3.98393	0.000801577	0.0204596
Pxn	-2.08617	1.20567	-2.08617	-2.08617	-2.08617	-2.08617	-2.08617	1.12002	4.43908	4.04716	0.000807977	0.0205992
Myo15	-2.35739	0.669142	1.55577	-0.0596425	2.35306	2.80488	-2.35739	2.60338	5.13186	3.83593	0.00081206	0.0206795
Mppe1	1.14165	3.93359	4.34894	0	0	1.78595	1.34665	1.57027	4.62063	3.87404	0.000815292	0.0207285
Trim9	1.68494	-1.12703	-1.42311	-1.96343	2.24481	-0.493853	-1.71425	2.1853	5.23812	3.76953	0.000815862	0.0207285
Zfp14	-0.322704	2.16618	0.11308	-1.4606	-0.597077	-1.4606	1.87883	2.69031	4.6212	3.82518	0.000832604	0.0211296
Atp2b4	4.54361	3.49959	-0.115197	2.33038	2.69733	1.97697	5.22528	2.42397	5.52182	3.76015	0.000834498	0.0211534
Rcan2	-1.39706	1.6949	-1.39706	0.0587719	-1.39706	-0.417849	2.21441	-1.39706	4.46399	3.9064	0.000841499	0.0212647
Rptor	-1.60404	0.88961	2.91044	-1.60404	2.47432	-1.60404	0.508884	1.61006	4.73054	3.86001	0.000841705	0.0212647
Isg20	3.08357	0.934817	0	0	0	1.23161	3.82336	0	4.46402	3.96115	0.000841841	0.0212647
Mtm1	-0.656659	2.35716	-0.897705	-0.736793	-0.777827	2.4944	-1.90591	0.175326	4.68462	3.78585	0.000842738	0.0212647
Aph1c	0	0	3.26098	0	0	0	1.83859	0	4.36274	4.10679	0.000845358	0.0213065
Septin11	-6.27827	-1.17419	-0.524483	-6.27827	-0.248918	0.459847	-0.0899617	-0.710589	6.29908	3.81776	0.000847078	0.0213177
Lrrc57	-1.7166	2.39174	-1.7166	0.304048	0.295309	2.55085	-1.7166	-0.147826	4.6556	3.85687	0.000847731	0.0213177
Dennd1b	1.55278	-1.15513	-1.15513	-1.15513	0.139491	-1.15513	-1.15513	2.55417	4.43988	3.9539	0.000855067	0.0214219
Vipas39	-4.24806	-0.538573	-0.802948	-3.07319	0.148121	-4.24806	-2.76294	-0.471047	4.85294	3.81361	0.000855285	0.0214219
Plppr5	-0.324332	-1.46131	-1.46131	1.61931	-1.46131	-1.46131	2.52862	-0.274496	4.49121	3.899	0.000855421	0.0214219
Letmd1	-1.9823	-3.20995	-4.15674	-0.207879	-4.15674	-4.15674	-0.354076	-1.70262	4.69523	3.85166	0.000857842	0.0214219
Engase	-1.15094	-1.15094	-1.15094	2.33798	2.9068	0.0815953	0.17252	0.0357649	4.53116	3.85117	0.000858791	0.0214219
Trak2	3.29425	0.618727	-0.305954	1.19888	0.0626207	1.45629	-2.26356	-2.26356	4.93277	3.81155	0.000859391	0.0214219
Smpd4	4.25266	1.90085	0	4.46768	0	3.17518	1.32583	0	4.69281	3.89675	0.000859686	0.0214219
Prkd1	0.0177746	0.0872295	-1.04684	-1.00847	-3.11653	-1.87925	2.25062	-0.695756	4.86728	3.77732	0.000859923	0.0214219
Dmd	3.59994	0.0684197	-0.388604	1.26019	-1.39706	1.81562	0.154488	0.0713101	4.69692	3.77699	0.000860597	0.0214219
Gnb1l	-4.31313	-2.48468	-4.31313	0.00330327	-1.9871	-0.324603	-4.31313	-4.31313	4.74603	3.89565	0.0008618	0.0214277
Abhd11	3.8621	0	3.27772	1.28602	0	0	1.55397	0	4.49244	3.94895	0.000864226	0.0214639
Mlst8	0.437735	-0.211764	3.00419	0.439443	-1.39706	2.75447	-1.39706	0.697774	4.67353	3.80786	0.000866788	0.0214856
1810010H24Rik	4.3345	4.06625	4.33051	1.29331	5.99664	1.07903	5.85497	3.3631	5.43758	3.77384	0.000867046	0.0214856
Alpl	-1.15607	1.38673	2.43251	-1.15607	-1.15607	-0.174619	-1.15607	-1.15607	4.41712	3.94683	0.00086819	0.0214899
Cdhr3	0	1.2249	0	0	3.41365	1.07475	0	0	4.37245	4.01129	0.000870522	0.0215235
Kif21b	0	2.47563	3.23769	0	0	0	0	1.8759	4.40194	4.00641	0.000879408	0.0217189
Mdm4	-4.97473	-1.21846	-0.975537	-4.97473	-3.63733	-0.757217	-3.62391	-3.52784	4.89491	3.80019	0.000882379	0.021768
Lrfn3	0	0	0	0	2.43826	2.16931	3.43983	0	4.42189	4.00377	0.000884247	0.0217897
Shd	0	0	0	0	0	0	0	3.21557	4.32831	4.18204	0.00089018	0.0218935
Pax2	0	0	3.30031	1.28868	0	0	2.39206	0	4.38479	4.00042	0.000890439	0.0218935
Lrrc56	2.72011	2.36371	3.00458	-0.953602	1.35757	-2.45316	2.67698	-1.2511	5.34139	3.75877	0.000898564	0.0220687
Mib1	-0.96651	0.117272	1.5799	-2.96434	-2.09931	-0.194361	-2.96434	-2.96434	4.66371	3.82662	0.000908096	0.0222781
Pkib	-1.55108	1.73746	-2.80009	-1.29081	-2.80009	0.808224	-1.45115	1.25751	4.75402	3.78676	0.000910359	0.0222921
Bcor	-1.12565	1.02437	1.46132	-2.94592	-2.68504	-0.933438	-5.18631	0.292049	5.87001	3.75311	0.000910684	0.0222921
Timeless	0	0	1.04954	0	0	3.43073	0	0	4.36113	4.06859	0.000912331	0.0223077
Cdh23	0	0	0	1.28908	3.27488	0	0	1.46663	4.36559	3.98793	0.000913883	0.022321
Kcnip1	0	0	0	0	0	1.22832	0	3.32686	4.35111	4.06524	0.000918461	0.0223919
Myh7	0	0.933489	2.19025	4.02409	0	0	0	3.55964	4.51787	3.92052	0.000918815	0.0223919
Zfp746	4.06416	3.97618	3.54027	3.63095	0.388511	4.84499	0.366858	-1.17171	5.49287	3.7483	0.00092113	0.0224236
Tdrd5	0	2.24675	3.99246	0	1.92097	0.978018	0	1.9938	4.48696	3.86499	0.00092243	0.0224306
Vangl2	0.22984	2.30821	-1.59822	-1.59822	1.53607	2.37851	-1.59822	3.307	4.83104	3.81777	0.000926569	0.0225065
Klhl32	1.73674	0	0	1.50778	1.69144	0.980764	0	3.80165	4.44	3.86129	0.000930038	0.0225659
1700019D03Rik	-1.15695	1.70229	-1.15695	-1.15695	2.10674	-1.15695	-1.15695	-1.15695	4.40172	3.97765	0.000933676	0.0226293
Avl9	0	0	0	3.85387	3.56303	2.15556	2.6674	3.66951	4.63449	3.85722	0.000938477	0.0226777
Tbc1d14	0.165771	-0.615367	0.08073	1.92757	-4.30035	1.94446	-2.83207	-1.78488	5.61644	3.74032	0.000938725	0.0226777
Zfp687	4.6612	4.45552	4.60279	1.59669	2.20823	4.20398	-1.17438	2.4251	5.63294	3.74031	0.000938746	0.0226777
Hspbp1	3.64765	2.28291	0	4.49106	2.07096	2.56894	0	1.46887	4.6613	3.8114	0.000940098	0.0226855
Osbpl5	-3.1154	-3.1154	-3.1154	-3.1154	-3.1154	-3.1154	-3.1154	-3.1154	4.32137	4.15262	0.000941371	0.0226914
Dmxl2	1.14168	4.70837	0	3.43499	3.02558	2.39348	1.48535	4.50962	4.82341	3.77035	0.000945779	0.0227729
Slc39a14	3.85451	2.34612	-0.14754	0.296508	-1.15714	1.73811	1.05892	0.166021	4.72928	3.73559	0.000949313	0.0228327
Rev3l	-3.04581	2.66235	2.13854	-3.04581	-0.186902	1.00618	2.26523	1.92337	5.43811	3.76782	0.000951348	0.0228327
Sec16b	0.858446	-0.593627	-3.39599	-3.39599	-0.750737	-3.39599	-3.39599	1.22462	4.76236	3.8509	0.000951736	0.0228327
Spata3	0	0	1.01281	0	3.03563	0	0	0	4.32886	4.04688	0.000952796	0.0228327
Fgd4	-2.54231	-1.39795	-0.280149	1.02605	-3.68249	-0.424265	-3.68249	-3.68249	4.74581	3.80522	0.00095343	0.0228327
Prps2	-1.15098	-1.15098	0.8317	0.682112	1.65693	-1.15098	0.945053	3.1168	4.54819	3.80363	0.000956873	0.0228674
Slc22a23	-2.37686	-0.62814	1.83753	-2.37686	-2.37686	-2.37686	-2.37686	-2.37686	4.48344	3.96554	0.000957528	0.0228674
Mobp	0	0	0	0	3.20121	1.23824	0	0	4.34705	4.04417	0.000957981	0.0228674
Tpmt	-1.96178	-0.489316	2.28508	3.43281	2.03527	1.34386	-0.4173	-1.96178	4.93815	3.7643	0.000959184	0.0228712
Slco2b1	0	0	1.01273	0	0	0	0	3.21541	4.33556	4.04291	0.0009604	0.0228712
Cacna1e	4.60354	1.69652	1.93716	1.45339	1.12641	1.65383	0	2.34626	4.59961	3.76337	0.000961243	0.0228712
Impdh1	4.92359	4.08449	3.90519	4.51953	4.47434	0	0	2.81322	5.06952	3.79769	0.000969912	0.0230493
Tab3	-4.04068	0.321097	-4.04068	-2.8657	-2.12019	0.86177	-2.49505	-1.76	4.85889	3.75911	0.000970814	0.0230493
Wnk3	-3.14245	-1.75292	-4.28516	-2.99469	-2.13222	-0.774276	1.34101	0.175104	5.03825	3.72552	0.000972251	0.0230586
Evx2	0	0	0	0	0.866613	3.83469	1.348	1.19119	4.41401	3.89349	0.000973962	0.0230718
Zscan22	1.51909	-0.881717	-1.53697	-2.54197	-2.54197	-1.56431	-2.54197	-1.07134	4.4977	3.79533	0.00097513	0.0230718
Nxpe3	-2.95225	1.22065	-2.95225	-2.95225	-1.82433	-0.212388	-2.95225	-2.95225	4.5287	3.89255	0.000975939	0.0230718
Zfp729a	0	4.28022	0	0	0	3.42187	0	0	4.52253	4.03356	0.00097855	0.0231088
Flt3l	2.23967	2.13795	3.16938	-1.96442	-1.96442	3.61684	-0.495129	3.75676	5.38471	3.75397	0.000982502	0.0231774
Tmem266	0	0	3.29254	0	0.870363	1.07522	0	0	4.3525	3.95264	0.000983622	0.0231791
Garre1	-2.67077	-2.40009	-2.2419	-5.14506	-1.1731	-5.44411	-0.0338715	-2.83756	5.74424	3.69113	0.000985526	0.0231822
Tgm2	0	0	2.96495	0	3.07174	0	2.50236	0	4.4331	3.95116	0.000986677	0.0231822
Brpf3	2.95518	2.97183	-1.17194	5.03836	4.3759	3.42661	3.12691	1.05674	5.50725	3.71921	0.000986902	0.0231822
Kctd14	0	0	0	0	2.60542	0	0	3.21163	4.36991	4.02602	0.00099342	0.0233106
Ston2	1.9966	1.69788	0	3.63983	0	0	0	0	4.41455	3.94674	0.000995807	0.0233317
Ikzf2	-0.941699	2.22278	2.15489	-2.08529	1.48062	-1.10287	-0.736783	-0.762046	4.73438	3.71516	0.000996432	0.0233317
Bcl2l11	-1.15382	-0.218462	-0.14664	3.68017	1.74775	-1.15382	1.60288	1.53333	4.64079	3.74469	0.00100395	0.0234828
Glb1l2	-4.32988	-1.73873	-6.17179	-4.06719	-0.42218	-2.42808	-1.26992	-1.17857	5.58299	3.70973	0.00100934	0.0235839
Nktr	-1.28015	-2.02947	-0.171173	-1.92051	-1.48808	-4.54876	-3.12959	1.57949	5.93629	3.67776	0.00101781	0.0237489
Myb	0	0	3.40849	0	1.34703	1.07486	0	0	4.36728	3.93592	0.00101855	0.0237489
Zfp131	-0.284227	1.78342	0.268913	-4.40111	0.934061	0.82946	-3.04622	-4.40111	5.55304	3.73754	0.0010208	0.0237726
Dip2b	1.14091	4.22503	1.04478	0	3.13821	1.3078	2.1697	0	4.56432	3.77484	0.00102171	0.0237726
Esyt2	-0.812026	-0.205094	-3.27548	-4.58845	1.74419	-0.884123	-0.0997882	-3.03855	5.37688	3.70397	0.00102322	0.0237826
Kctd6	4.09734	0.933583	1.04457	2.11556	0	2.31278	0	0	4.49141	3.81628	0.00102783	0.0238647
Nectin3	2.1519	-0.206921	-1.15093	-1.15093	1.94688	-1.15093	2.51713	0.0357661	4.52802	3.77144	0.00102968	0.0238824
Robo3	0	0	0	4.02595	0	0	0	0	4.39579	4.10236	0.00103596	0.024003
Nubp2	1.24894	3.73921	4.8848	0	2.92648	1.26737	3.7471	0	4.77014	3.76805	0.00103766	0.0240172
Tet2	-1.12477	-4.49495	-4.49495	-2.23441	-2.76747	-0.172874	-3.02287	-3.3019	4.75381	3.72956	0.00103994	0.0240263
Sgcd	-1.42812	-2.56509	-2.56509	-1.39952	-2.56509	1.48303	-1.21929	-1.24382	4.49144	3.76696	0.00104023	0.0240263
Cluap1	3.93379	4.1048	0	0	0	1.51097	3.92812	1.99475	4.68263	3.80975	0.00104286	0.0240556
Cpne7	1.14135	2.99894	3.57956	0	0	2.25574	0	0	4.47155	3.86147	0.00104367	0.0240556
Tle3	-4.47505	-1.7754	-2.03548	-1.77186	0.545317	-5.80552	0.329467	-0.182458	5.86425	3.69436	0.00104682	0.0240561
Tmem25	1.26253	4.10256	1.32152	1.17171	0.868624	4.48206	1.34887	3.94212	4.7509	3.6943	0.00104696	0.0240561
Prickle1	0	1.73574	0	1.28875	0	0	0	3.46537	4.38124	3.92263	0.00104722	0.0240561
Ppil3	0	4.75262	4.05788	3.33784	2.47578	4.04304	1.47125	0	4.84736	3.76368	0.00104805	0.0240561
Plxnb1	-4.2649	0.497573	0.459084	0.350174	-2.61385	-4.2649	-1.30316	1.22604	5.263	3.72565	0.00104945	0.0240566
Mapk7	-0.155311	-1.6002	0.00837693	-4.22792	-3.27461	-5.41438	-0.28884	0.819331	5.69671	3.69298	0.00105025	0.0240566
Trim50	0	0	0	1.50902	0	0	3.52978	0	4.3729	3.99745	0.00105197	0.0240712
Cd59b	3.0818	3.58647	2.93505	0	0	0	1.97911	0	4.50721	3.85555	0.00105711	0.0241637
Ppfia2	-0.82009	-1.39658	-0.433843	-5.59417	-7.03111	-2.4288	-1.00889	-7.03111	6.26169	3.72115	0.0010605	0.0242158
Tfap4	1.91527	-1.92617	-1.86486	-2.8714	-0.644215	-2.8714	-1.54689	-0.877198	4.61809	3.72071	0.00106158	0.0242158
Zfp800	3.55077	0.262927	0.445037	3.3959	1.9307	1.45477	0.976091	-2.08141	5.22821	3.68773	0.00106342	0.0242328
Rtn4ip1	2.32103	0.317364	-1.15644	-1.15644	-1.15644	-1.15644	-1.15644	1.29898	4.40996	3.85149	0.00106643	0.0242764
Rps6ka1	0	0	2.50818	0	2.36962	4.31668	1.48866	2.14737	4.55888	3.79749	0.00107168	0.0243709
Tmem168	2.00141	2.18596	-1.51702	-1.51702	0.675794	-1.51702	0.566447	-1.51702	4.54017	3.79535	0.0010768	0.0244621
Plin2	-1.60447	-0.667153	1.82282	0.370429	-1.60447	-1.60447	-1.60447	-1.60447	4.4026	3.84619	0.00107873	0.0244736
Abtb1	-5.26556	-2.54078	-1.98279	-2.54604	-2.32609	-4.28135	-3.93741	-3.81754	4.78525	3.68139	0.00107952	0.0244736
Pgm2	0	0	1.6045	0	0	2.34018	4.03975	0	4.44928	3.90683	0.00108235	0.0245074
Mtss2	1.00807	-0.392689	-1.88482	-2.0172	-4.04962	1.46139	-4.04962	1.06115	5.25048	3.71204	0.00108323	0.0245074
Unc93b1	0	0	3.12432	0	0	2.22659	0	0	4.36379	3.98208	0.00108492	0.0245205
Glrb	1.47373	1.09779	3.15714	-2.23492	1.86972	-1.158	-0.88329	1.66563	5.0109	3.67885	0.00108604	0.0245208
Slc10a7	-4.15757	0.256143	-2.23253	-4.15757	-0.29379	0.828512	-2.8064	-2.71098	4.93977	3.70935	0.00109004	0.0245755
Tbce	1.94423	1.15043	2.74988	1.75669	-1.06284	-2.19111	-2.19111	1.02674	4.90469	3.7091	0.00109069	0.0245755
Msantd3	0	2.5281	0	2.8471	4.22056	1.95513	0	1.32127	4.55051	3.78782	0.00109498	0.0246399
Tbcel	1.39476	1.32691	-1.51605	2.84231	-1.51605	-0.209158	0.885645	-1.51605	4.60475	3.74394	0.00109627	0.0246399
Rin2	2.05937	2.23006	-0.146995	-1.15513	-1.15513	-1.15513	-1.15513	-1.15513	4.43971	3.83846	0.00109689	0.0246399
Foxn3	-2.41979	-1.71402	-0.663561	-5.47743	-0.139638	-3.18287	-2.35405	-5.18475	6.07309	3.64487	0.00110184	0.024726
Dhcr7	1.71452	-1.752	-2.14661	-2.69767	0.0794298	-1.84767	-0.644706	-2.56932	5.44537	3.64301	0.00110679	0.0248119
Sh3kbp1	3.35875	4.37343	3.84081	2.41995	1.95367	4.5946	-0.709911	4.91399	6.3921	3.63919	0.00111705	0.0250164
Ccdc141	2.52409	3.93662	3.60593	0	3.82674	0	0	1.18946	4.6514	3.77683	0.00112211	0.0250918
Eif2d	2.4942	-0.778224	2.45949	1.08784	-1.7303	-0.65356	3.38566	2.34798	4.97571	3.66487	0.00112268	0.0250918
Ccdc88b	0	0	3.17384	0	0	0	0	0	4.33043	4.05843	0.00112664	0.0251294
Ptprc	0	0	3.17384	0	0	0	0	0	4.33043	4.05843	0.00112664	0.0251294
Foxa1	-1.15199	2.35844	-1.15199	0.363171	1.86674	-1.15199	2.98448	0.169577	4.59095	3.72966	0.00113256	0.0252361
Plaat1	-3.26372	-0.104442	-3.35929	-4.40634	-2.06194	-3.17577	-2.10456	-4.40634	4.68485	3.69196	0.00113512	0.025253
Fam189b	-3.17931	-0.498501	-3.17931	-3.17931	-2.31753	0.470799	-3.17931	-3.17931	4.48762	3.82243	0.00113561	0.025253
Zfp428	2.55211	-2.45162	-1.13436	1.80456	2.19829	-1.22563	1.95529	-0.895419	5.03703	3.65689	0.00114415	0.0253983
Vps37c	0.408083	-1.42818	-0.831412	-4.8358	-2.50134	0.832903	-2.73742	-4.8358	5.25889	3.68845	0.00114444	0.0253983
Actr6	-2.68468	-0.895166	-2.80325	-4.60814	0.286219	-1.30554	-2.51045	-4.60814	4.90212	3.68779	0.00114619	0.0254116
Pilrb2	0	0	1.33878	0	0	0	3.52991	0	4.37025	3.95339	0.00114927	0.0254544
Pip5k1c	-3.67221	0.174236	-2.15593	-0.435965	-0.785045	-5.50366	0.248515	-3.51942	5.59038	3.65332	0.0011539	0.0255312
Sned1	0	0	0	1.50409	0	0	1.32785	3.25942	4.36295	3.87401	0.00115927	0.0256245
Cyp4f14	0	2.68254	0	0	3.38458	0	2.08446	0	4.42129	3.86949	0.00117027	0.0258419
Hmmr	0	0.937979	2.51604	0	0	3.29345	0	0	4.38855	3.86705	0.00117627	0.0259484
Cdkl2	2.57156	-1.39706	-1.39706	-0.231579	1.83392	-0.419312	0.73298	-0.0758183	4.53556	3.67587	0.0011785	0.0259698
Fam76a	0.98425	2.87217	2.04487	2.83461	4.02175	1.05544	0.166534	0.459622	4.92719	3.61662	0.00117959	0.0259698
Aldh3a2	-0.697706	1.17245	0.271541	-2.52397	2.90331	1.92305	1.437	-2.52397	5.02996	3.67469	0.00118174	0.0259846
Cyp4f16	-3.96328	0.31262	-2.91601	-0.790718	-3.96328	-0.419747	-3.96328	-3.96328	4.69793	3.75324	0.00118261	0.0259846
H6pd	2.69949	4.66379	3.65673	3.07481	0	0	2.08519	3.72124	4.77669	3.70963	0.00118553	0.0260106
Zfyve21	1.33126	1.18596	1.25589	-2.61835	-2.61835	2.45877	-2.61835	0.965596	4.95201	3.7094	0.00118615	0.0260106
Rnf213	0	2.32397	3.37999	1.16466	3.69333	0	0	0	4.49472	3.79759	0.00119833	0.0262503
B4galt2	1.94701	1.18932	3.4971	-0.165809	2.20557	-1.45666	3.49584	-0.131437	4.95565	3.63701	0.00119946	0.0262503
Abhd10	2.37049	3.86326	4.92109	2.30966	2.83863	0	2.76114	1.19431	4.78586	3.66718	0.0012026	0.0262693
Zfand1	0	0.945242	2.43883	2.12817	0	1.58194	3.87137	0	4.4641	3.74568	0.0012027	0.0262693
Mphosph9	1.83787	3.77157	3.93579	1.28774	0	4.2485	0	1.44962	4.69662	3.7022	0.00120581	0.0263112
Stxbp2	-1.98799	-0.406037	0.0782825	-1.95546	2.21494	-1.34385	-0.999678	-1.80523	4.81743	3.60698	0.00120734	0.0263186
Krba1	-1.89298	-3.89261	-2.88376	-0.0705995	-3.89261	-2.62302	-1.79102	0.455768	4.71131	3.66412	0.00121122	0.0263762
Nup62cl	-3.29458	-2.02137	0.181709	-3.29458	-3.29458	-1.71221	-3.29458	-3.29458	4.4576	3.79221	0.00121237	0.0263762
Plk5	3.67108	0	1.04453	0	2.0986	0	3.58698	2.93807	4.54765	3.74158	0.00121372	0.0263797
Ttpal	-2.00411	-1.05884	1.69074	1.81647	-2.00411	1.64477	-0.679558	-2.00411	4.61983	3.697	0.0012202	0.0264944
Stx17	0	0	1.0088	1.28792	1.29376	0.981432	3.80309	0	4.4175	3.73627	0.00122818	0.0266416
Gata4	1.34412	0	0	1.28866	0	0	3.59202	0	4.38636	3.84496	0.00123199	0.0266947
Zfp445	3.75428	4.67767	3.50444	2.10945	0.868121	0	1.34865	2.19803	4.7409	3.65646	0.00123305	0.0266947
Cdkn3	0	1.97551	3.39923	0	0	0	0	0	4.37961	3.91602	0.00123903	0.0267979
Zfp280d	-4.12074	-0.608676	0.508016	-0.524714	-4.12074	0.0235379	-2.6178	-4.12074	4.88779	3.68956	0.0012411	0.0268165
Disp1	0	0	3.64074	0	3.58541	3.28516	0	0	4.54075	3.84029	0.0012441	0.0268476
Irx4	0	1.18199	0	0	3.12127	0	0	0	4.34079	3.91327	0.00124593	0.0268476
Uros	1.13692	2.71601	1.0445	0	3.3154	3.82728	0	0	4.53088	3.72965	0.00124645	0.0268476
Ablim2	0	1.66056	3.71272	0	0.864643	2.15633	2.2171	4.694	4.65189	3.68701	0.00124835	0.0268476
Pknox2	2.2714	-2.24417	-1.23379	-0.955447	1.39989	0.413909	1.67999	-2.24417	4.74959	3.65108	0.00124861	0.0268476
Dcaf11	3.62287	3.05991	-1.44821	3.95995	3.27087	5.10973	5.56609	4.47429	6.1739	3.61813	0.00125447	0.0269238
Fam110b	3.84763	0	1.57462	1.16811	1.54764	0	2.09646	0	4.45202	3.72672	0.00125459	0.0269238
Zfp524	0	2.52326	1.04644	3.63654	2.40824	0	0	0	4.45039	3.77527	0.0012577	0.0269642
Myt1l	-0.393412	-0.575477	-2.22526	-5.69811	0.1801	-6.90688	-0.00955219	0.249314	6.81891	3.61565	0.00126189	0.0270053
Gm26550	0	3.11748	0	0	0	0	0	0	4.33046	3.99921	0.00126206	0.0270053
Mtx3	2.24817	-1.39705	-1.39705	-1.39705	-0.529988	-0.415157	-0.0488537	-1.39705	4.40592	3.72341	0.00126389	0.0270183
Vps13d	-4.23174	0.681499	0.414435	0.475983	-4.23174	-2.96902	-2.22496	0.689553	5.17455	3.6448	0.00126704	0.0270596
Eipr1	1.82236	0.934105	2.21235	2.48273	0	4.55499	1.34615	1.87173	4.58484	3.64434	0.0012684	0.0270625
Icam2	0	0	3.06768	0	0.871834	0	0	0	4.32869	3.9002	0.00127918	0.0272512
Etl4	3.72732	4.88978	3.60053	-1.17788	3.5171	4.84199	0.80371	4.8643	5.81569	3.60974	0.00127971	0.0272512
Cc2d1b	1.94266	-3.24626	-0.620648	-1.49234	-2.00512	0.71942	-1.77513	0.0173432	4.86958	3.6088	0.00128259	0.0272729
Prkcz	1.67407	1.03587	0.386436	-2.08322	3.14993	1.72012	-2.08322	-0.104263	4.89226	3.63936	0.0012832	0.0272729
Aste1	-0.441323	2.14637	-1.58009	-1.58009	-0.232221	-1.58009	-0.107168	-1.58009	4.4431	3.71444	0.00128943	0.0273789
Asap2	1.19889	3.40936	2.20268	1.87156	0.486367	-1.16382	1.07747	4.17898	4.94529	3.60511	0.00129386	0.0274467
Flnc	0	0	1.01061	0	0	1.23927	0	3.56563	4.37632	3.82059	0.00129659	0.0274547
Camsap2	-0.40727	-3.66339	-3.66339	-0.309466	0.136035	-3.66339	-2.33852	-3.66339	4.63542	3.71191	0.00129672	0.0274547
Zbtb41	1.14016	0	2.07575	3.43024	0	0	0	0	4.3874	3.8181	0.00130338	0.0275646
Eml2	-0.47332	2.81455	-0.565559	1.717	-0.273172	-0.0294654	-1.61083	-0.289191	4.60202	3.6015	0.00130504	0.0275646
Slc25a44	1.13965	0.937308	3.55399	1.28823	0	1.30262	0	0	4.40293	3.70883	0.00130565	0.0275646
Mrpl4	0.408278	-1.49372	-3.59051	-0.148416	-1.85569	0.399814	-3.57188	-1.99157	5.32125	3.5704	0.00131881	0.0278159
Ppp2r3a	1.13823	1.706	1.00716	0	0	3.89277	1.98106	0	4.45467	3.70328	0.00132194	0.0278553
Fat2	0	3.64981	4.39717	1.83698	2.13373	1.58391	2.64326	1.46991	4.65584	3.62342	0.00133182	0.0280312
Thumpd2	-1.16157	-1.16157	-1.16157	-1.16157	-1.16157	-1.16157	-1.16157	1.90439	4.32744	3.87975	0.00133303	0.0280312
Six3os1	0	1.18741	0	0	0	3.35101	2.70536	3.93943	4.52773	3.74808	0.00133409	0.0280312
Clcn5	-1.15666	-1.15666	-1.15666	-1.15666	-1.15666	2.51611	-1.15666	0.822645	4.40627	3.80583	0.00133736	0.0280732
Dhx34	1.99995	-1.57023	0.233356	-0.394093	2.29372	3.35527	-1.57023	3.1514	4.92619	3.62113	0.00133895	0.0280798
Brca2	3.38965	0.948936	0	0	0	0	0	1.32291	4.36655	3.80466	0.00134066	0.028089
Zfp438	0	0	1.05066	0	0	3.06532	0	0	4.33747	3.87552	0.00134446	0.028142
Qtrt1	3.63273	1.70642	0	0	3.8667	0	0	0	4.51196	3.8024	0.00134704	0.0281693
Tsr3	2.13312	4.14033	1.9842	-1.45511	2.49665	2.67891	3.99397	-0.253851	5.26144	3.58694	0.00135097	0.0282101
Ap3m2	1.14188	4.48677	3.4132	2.12898	2.71722	0.979647	1.55202	0	4.63422	3.61705	0.00135178	0.0282101
Hps3	-1.16136	-0.221183	-1.16136	-1.16136	1.84989	-1.16136	-1.16136	-1.16136	4.33731	3.80036	0.00135282	0.0282101
Sp110	0	0.940171	3.17362	0	0	0	0	0	4.33743	3.87192	0.00135427	0.0282137
Matk	0	0	3.18463	1.45191	0	0	0	0	4.34791	3.86861	0.00136336	0.0283763
Ebf3	1.73183	3.66024	1.32807	0	0	4.23513	0	2.29026	4.59894	3.68819	0.0013672	0.0283969
Asb7	-2.44605	1.58651	-1.4408	-2.44605	-1.0932	0.707987	-2.44605	-0.57489	4.55523	3.6465	0.00136943	0.0283969
Ddx56	1.21037	-0.513364	2.61528	-0.290886	1.63175	2.65082	-1.45989	-1.45989	4.67988	3.61141	0.00136969	0.0283969
Robo1	0.0665356	-0.651067	-4.92307	-3.42609	-4.92307	-3.84525	-0.440101	0.139395	5.20391	3.61075	0.00137181	0.0283969
Ppox	3.92191	4.13316	1.34048	0	3.65173	1.07414	0	3.56447	4.72803	3.64572	0.00137187	0.0283969
Wasf1	-1.64105	-3.94032	-3.87797	-2.85706	-0.907988	-3.10479	-1.29619	-4.89054	4.82086	3.58042	0.00137206	0.0283969
Gm32856	1.14409	0	0	1.17193	0	3.3706	0	1.19315	4.37612	3.73465	0.00137354	0.0284011
Nfe2	0	0.950283	3.1736	0	0	0	0	0	4.33764	3.86426	0.00137539	0.0284127
Ap3b1	2.12037	-0.199084	-0.845537	-3.05034	-3.05034	0.892933	-0.80812	-0.911197	4.85272	3.60823	0.00137989	0.0284792
Wdr33	1.29698	0.924045	-2.19918	-1.75431	2.41292	-1.60691	-0.020347	0.433557	5.73169	3.55028	0.0013845	0.0285382
Zfp607b	1.14158	0	3.17327	0	0	0	0	0	4.34034	3.85982	0.00138778	0.0285382
Itgad	0	0.939425	0	0	0	3.30303	0	0	4.3508	3.8598	0.00138782	0.0285382
Rlf	-1.1585	-1.1585	1.03957	-1.1585	-1.1585	-1.1585	-1.1585	2.13292	4.3769	3.78817	0.00138792	0.0285382
Rrnad1	5.67302	4.98532	1.05647	5.6778	3.72743	4.84596	3.99678	1.44369	5.46745	3.57395	0.00139331	0.0286224
Topors	0.581042	2.1402	-0.300768	0.236859	0.0877365	2.30242	-2.38686	-1.1909	4.84703	3.57076	0.00140393	0.0288138
Dock3	-2.26901	-2.00275	0.00499766	-0.970971	-3.4251	-3.48547	-3.20966	-3.51596	4.88476	3.54334	0.0014079	0.0288685
Pip5k1a	0.18993	2.31827	0.470114	-3.25867	2.51646	1.37225	-3.25867	0.728882	5.36653	3.59785	0.00141374	0.0289613
Dnah2	-1.57984	-0.633258	-1.57984	-1.57984	2.05343	0.00382449	-1.57984	0.514988	4.43832	3.67197	0.0014176	0.0289636
Amotl1	-1.1509	-1.1509	2.45249	2.30634	-1.1509	0.355737	1.26407	0.319705	4.51536	3.63135	0.00141769	0.0289636
Ncoa3	2.14086	0	1.80435	1.51125	1.29827	1.65329	1.34586	4.45154	4.55599	3.59662	0.00141778	0.0289636
Ccdc33	-1.16093	1.78545	-1.16093	-1.16093	-1.16093	-1.16093	0.189062	-1.16093	4.3419	3.77725	0.00142013	0.0289714
Zhx2	3.15157	1.5851	1.52554	-0.125014	-0.713751	-0.598596	-1.57957	0.946728	4.69129	3.56574	0.00142078	0.0289714
Mast3	1.98702	3.81229	1.81434	3.07682	-1.16839	2.70129	4.64118	1.97053	6.36627	3.53899	0.00142275	0.0289847
Asph	3.02166	4.48673	4.55043	1.29182	4.14599	5.51099	2.10309	2.70827	5.15477	3.56447	0.00142509	0.0289988
Sema3a	1.34547	1.6685	0	1.50702	3.59335	0	0	0	4.41871	3.71737	0.00142606	0.0289988
Vps8	0	1.66816	0	0	3.5317	3.38044	1.47381	1.18699	4.48772	3.66801	0.00143021	0.0290122
Bicral	3.10058	0.156925	2.51937	3.72224	1.65912	-0.190014	3.30916	-1.91526	5.3128	3.56285	0.00143058	0.0290122
Lig3	2.86276	3.34175	2.5702	3.8053	1.45063	-1.16377	0.187415	0.033804	4.94272	3.56283	0.00143066	0.0290122
Epn2	-4.96056	-0.410695	-3.34341	-4.70497	-1.38695	-0.458364	1.33464	-0.229921	6.81411	3.53489	0.00143694	0.0291068
Rtca	0	2.84099	1.98359	2.03501	0	3.68448	0	0	4.47889	3.71354	0.00143796	0.0291068
Bckdhb	1.1417	0	2.80765	3.1499	3.796	2.16796	0	3.71211	4.62352	3.62411	0.00144137	0.0291097
Patj	4.10833	3.71052	2.176	0	4.11667	4.84175	0	1.32484	4.88468	3.62405	0.00144157	0.0291097
Med24	-3.88303	-0.969692	-2.50352	-2.57084	-3.84539	-4.05492	-5.13158	-0.135448	4.96247	3.55926	0.00144285	0.0291097
Dock11	0	1.46077	0	1.28596	3.05578	1.07189	1.32341	4.00728	4.50247	3.6235	0.00144337	0.0291097
Gga3	3.08626	3.27231	3.60777	0	0	0	2.51613	4.01179	4.65753	3.66323	0.00144554	0.029127
Gm31745	2.72835	-0.209357	-0.147525	0.906912	-0.0289431	-0.0829343	2.94658	3.18642	4.72832	3.52983	0.00145459	0.0292757
Zcchc9	-2.14156	0.384205	-1.09449	-2.14156	-2.14156	-2.14156	1.39819	-2.14156	4.43605	3.70794	0.00145557	0.0292757
Slc6a3	0	0.948267	0	0	3.76395	0	0	0	4.38719	3.83438	0.001461	0.0293582
Hmcn1	0	3.95157	0	3.42044	0	0	3.15151	0	4.54532	3.76165	0.00146746	0.0294612
Sult1a1	0	3.3101	0	0	0	0	2.09707	0	4.37643	3.82958	0.00147523	0.0295904
Zfp516	-4.0706	-2.34414	0.925746	-4.52636	-0.165185	-1.60137	-0.750949	-3.61919	5.79172	3.52211	0.00148199	0.0296989
Hdhd5	3.25968	0	0	0	0	0.984712	0	0	4.34589	3.82675	0.00148373	0.0297068
Dyrk1a	3.00928	-1.45695	2.60262	-1.45695	1.72835	2.71548	2.90999	-1.45695	4.91137	3.61077	0.001486	0.0297084
Cgn	-1.58456	-0.640451	-1.58456	1.43221	-1.58456	-0.311418	0.545476	2.80243	4.55241	3.61063	0.00148649	0.0297084
Cyb5rl	3.38979	0	1.3222	0	0	0	0	0	4.36392	3.8246	0.0014902	0.0297555
Agbl5	2.64685	-2.59084	2.69353	-1.78381	1.47177	1.20055	0.677507	0.103788	5.84392	3.51898	0.00149325	0.0297894
Arsg	3.9304	1.83097	0	1.28724	0	0	0	1.63899	4.44999	3.69483	0.00149765	0.0298424
Tle1	1.42862	4.00295	1.10345	1.77399	0.718307	3.82408	0.337908	1.19086	4.9766	3.51749	0.0014986	0.0298424
Ptrh1	3.53469	2.67018	0	1.51204	0.865814	0	0	0	4.43216	3.69367	0.00150142	0.0298716
Nol9	3.74157	1.22739	0	0	0	0	0	2.45435	4.42546	3.74743	0.00151203	0.0300558
Zdhhc23	3.08294	3.6388	1.04527	1.28649	1.29731	4.04504	0	0	4.60192	3.60053	0.00152124	0.0302117
Ano5	3.63342	1.18428	0	0	0	0.981971	0	1.46777	4.40414	3.68623	0.0015259	0.0302768
Tkfc	3.36466	2.15018	2.1829	1.698	-1.15542	-1.15542	0.317389	0.839387	4.69176	3.5646	0.00152787	0.0302887
Adipor2	0	0	3.25605	2.2072	2.57612	0	1.48715	0	4.42157	3.68481	0.00153064	0.0303165
Kifc3	-0.313349	1.84118	-1.57582	2.79891	2.58138	-1.57582	1.95391	-1.57582	4.75847	3.59636	0.00153584	0.0303907
Dgke	1.90937	4.38628	0	2.85068	3.26528	0	0	2.88405	4.63296	3.63574	0.00153714	0.0303907
Ttll13	-4.8256	0.594987	-1.24096	-0.752907	0.897144	-3.74706	-4.8256	-0.461295	5.36036	3.55986	0.0015449	0.030517
Hdac7	5.18511	1.21755	3.71001	1.93421	5.07855	5.41901	2.10324	2.59501	5.22926	3.52966	0.00154808	0.0305524
Map6	-1.04537	-0.238418	0.623449	-2.38429	-2.08006	-5.02356	-2.85781	-3.23631	5.23258	3.52879	0.00155127	0.0305882
Tecpr2	0	0.936033	1.83297	0	1.92692	1.24118	0	3.86109	4.44387	3.63069	0.00155458	0.030626
Cep97	-2.94683	-2.94683	-2.94683	-2.94683	-2.94683	-2.94683	-2.94683	-2.94683	4.3139	3.89041	0.00155624	0.0306315
Entpd6	1.30167	-2.9694	1.613	0.62573	-2.9694	-1.67079	-1.423	-0.237055	4.8161	3.55559	0.00156039	0.0306858
Rbm20	3.18907	0	0	0	0	1.5875	0	0	4.35178	3.80101	0.00156308	0.0307115
Zbtb24	-1.15094	0.663288	-1.15094	0.960551	2.79882	2.13422	-1.15094	-1.15094	4.5329	3.62722	0.0015667	0.0307444
Lmtk3	-0.757324	-4.10931	-0.712947	-5.32731	-3.46828	-1.00018	-5.32731	-0.751865	5.18983	3.55349	0.00156804	0.0307444
Chil1	2.70779	3.69089	3.02781	0	0	0	3.95361	0	4.60046	3.67345	0.00156893	0.0307444
Srr	-0.044106	1.06287	-1.61012	-4.72853	0.516558	0.414011	-0.503126	-4.72853	5.51845	3.55267	0.00157105	0.0307587
Serpinb1a	1.14096	3.30908	3.9857	0	1.66688	3.20808	0	0	4.5683	3.62496	0.00157464	0.0307636
Nfya	2.71179	3.99961	1.05184	0	4.82577	1.59006	2.71609	4.89153	4.91973	3.55156	0.00157513	0.0307636
Muc6	0	0	1.01091	0	3.34299	0	2.1161	1.5656	4.39995	3.67153	0.00157548	0.0307636
Mlxip	1.14212	4.60172	3.38768	3.25783	3.76436	2.22629	0	4.24203	4.86412	3.5466	0.0015935	0.031065
Ryr1	-1.15902	1.83433	-0.110568	-1.15902	-1.15902	-1.15902	-1.15902	-1.15902	4.33885	3.72244	0.00159373	0.031065
Gramd2	0	0.950098	3.079	0	0	1.07556	0	0	4.34089	3.71939	0.00160403	0.0312183
LOC118567721	0	0.946274	0	0	3.1721	0	1.32542	3.49877	4.44573	3.66305	0.00160482	0.0312183
Btbd6	0	3.18984	1.80543	1.97459	1.29438	4.53232	3.59612	1.32262	4.69023	3.54321	0.00160617	0.0312183
Lpin1	-0.353492	-0.331984	-1.6025	2.91492	1.33418	-0.373345	0.3816	2.91405	4.75206	3.51375	0.00160777	0.0312183
Dcun1d4	0.126473	2.07955	-1.12729	0.0942106	2.0425	-0.517512	-4.05657	-1.64766	6.62362	3.48817	0.00160865	0.0312183
Mmp8	-1.16153	-1.16153	1.87785	-1.16153	-1.16153	-1.16153	-1.16153	-1.16153	4.3303	3.78621	0.00161068	0.0312303
Wdsub1	-4.27521	-0.394891	-2.94145	-0.0910332	0.571287	-4.27521	-4.27521	-0.375536	4.96724	3.57503	0.0016127	0.031242
Mdc1	-3.87032	-2.92613	-0.620843	-0.543327	-1.74201	-3.87032	-3.87032	-3.87032	4.55694	3.61368	0.00161485	0.0312563
Rap1gds1	-1.21927	-3.04456	-0.240238	-0.904625	0.894027	2.07906	-1.69421	-0.96524	4.84337	3.51085	0.00161888	0.0313069
Ccdc157	1.34358	3.29361	0	0	0	0	1.3276	0	4.37081	3.7126	0.00162714	0.0314391
Limk2	0	2.82364	0	0	0	2.74782	1.34593	3.76243	4.48662	3.65291	0.00164065	0.0316612
Gm30352	-3.57608	-3.57608	-3.57608	-3.57608	-2.70634	-3.57608	-3.57608	-3.57608	4.36156	3.77686	0.0016415	0.0316612
Zfp429	0.0936297	1.85733	-1.15559	-1.15559	-1.15559	-1.15559	2.20926	-1.15559	4.42753	3.65121	0.00164671	0.0317089
Nr1h3	0	1.70499	0	0	3.03411	0	0	0	4.34444	3.77526	0.00164684	0.0317089
Sap130	1.8207	1.92942	1.78873	0.358063	-3.17124	1.89353	-1.83867	-3.17124	5.28186	3.53099	0.00165269	0.0317846
Clk4	2.66811	1.72408	0.537553	-3.26099	-0.618512	0.540851	-2.55813	-0.0299989	6.03459	3.47675	0.00165365	0.0317846
Trim32	-1.95686	1.43755	1.72453	-1.95686	-1.95686	1.85525	-0.610591	-1.95686	4.5995	3.60132	0.00166013	0.0318795
Mgat4c	0.578597	3.02232	0.982406	0.590287	0.493096	-1.15539	3.39458	0.0350889	4.69054	3.49994	0.00166147	0.0318795
Pygo2	2.52046	3.10864	1.00933	2.06401	0	3.74316	1.50562	4.72392	4.72283	3.52799	0.00166435	0.031907
Itgb6	1.3463	0	0	0	0	3.31825	3.37285	0	4.44515	3.69995	0.00167111	0.0319762
Tdrd3	-4.16227	-0.991645	-0.432543	-1.49708	-0.960184	-0.211571	-5.30725	-5.30725	5.29278	3.52621	0.0016713	0.0319762
Taf1a	0	3.66356	0	0	0.865637	1.07348	1.50631	2.1443	4.43703	3.59741	0.0016747	0.0319762
Sulf1	3.51659	2.85615	0	1.2884	3.63627	4.59919	0	2.08062	4.73278	3.55841	0.00167524	0.0319762
Daam2	1.73909	0.938481	0	0	3.2741	1.07473	0	0	4.37314	3.64328	0.00167542	0.0319762
Arhgef6	0	1.18625	1.32728	0	2.9274	3.73967	0	0	4.46242	3.64294	0.00167664	0.0319762
Unc13d	0	0	3.01799	1.17445	0	0	0	0	4.33147	3.76597	0.00167817	0.0319778
Pacsin3	0	0	0	3.49239	2.97625	1.23063	1.47289	0	4.44006	3.64159	0.00168157	0.0320151
Gm14322	-3.59025	-3.59025	-0.807984	-3.59025	-3.59025	-2.51657	-3.59025	-2.39944	4.42294	3.64079	0.00168449	0.0320333
Plppr1	0	3.34927	0	0	0	3.14135	2.96275	0	4.47321	3.6955	0.00168687	0.0320333
Ypel1	0	0	0	0	2.94239	0	0	1.44742	4.33265	3.76322	0.00168757	0.0320333
Cxcr4	0	0	3.03953	0	0	0	0	0	4.32237	3.84709	0.00169229	0.0320333
Lilra6	0	0	3.03953	0	0	0	0	0	4.32237	3.84709	0.00169229	0.0320333
Mmp9	0	0	3.03953	0	0	0	0	0	4.32237	3.84709	0.00169229	0.0320333
Sergef	-1.95687	2.38727	-1.95687	-0.441872	0.791917	0.745873	0.00576148	-1.95687	4.6002	3.5539	0.00169268	0.0320333
Tnxb	-1.39706	-1.39706	-0.0704914	-1.39706	-1.39706	1.73153	2.18989	1.98095	4.52982	3.59216	0.00169451	0.0320405
Efcab7	-2.30623	-2.82573	-3.75926	0.0339952	-1.5858	-2.68733	-3.75926	-3.75926	4.54684	3.55151	0.00170194	0.0321535
Epb41l1	6.68198	5.16314	6.80675	2.11137	6.29651	6.92739	3.45448	5.64407	6.44001	3.48867	0.00170664	0.0322148
Ndrg4	3.03109	1.68157	-1.04899	-0.771413	-0.818547	0.691016	0.919567	-2.06094	4.79675	3.48752	0.00171132	0.0322756
Aifm2	4.03611	2.07215	3.65244	1.17306	3.95059	0	4.31985	0	4.78493	3.54658	0.00172128	0.0324357
Prkag2	0	2.68198	4.4098	4.08955	2.13866	2.15782	0	1.63696	4.69154	3.54492	0.00172786	0.0324968
Dhx35	0	3.91213	1.00758	0	1.2461	0	0	2.19957	4.44877	3.62895	0.00172854	0.0324968
Cacnb4	2.85806	0	1.34607	1.16561	1.54554	0	3.92759	0	4.49063	3.58318	0.00172893	0.0324968
Zfp46	3.52417	0.934405	3.32395	0	0	1.2319	0	1.76908	4.47224	3.58222	0.00173262	0.0325385
Phf23	0.323202	2.77978	0.246168	-2.14013	3.83055	1.73308	1.50367	1.48671	5.22524	3.48036	0.00174072	0.0326629
Neil1	-3.97527	-3.03809	-3.97527	-2.68711	-3.97527	-3.97527	-3.97527	-3.97527	4.40624	3.67741	0.0017525	0.032856
Ankfy1	-3.42501	-0.208431	-3.42501	-0.0426475	-2.56054	0.584371	-2.07794	-3.42501	4.64678	3.53722	0.0017586	0.0329146
Parp9	0	0	3.59222	1.16945	2.13595	0	1.5505	1.32269	4.42705	3.57558	0.0017586	0.0329146
Jade3	0	0	1.01292	0	2.84192	0	0	0	4.31824	3.73836	0.00177496	0.0331926
Enox1	4.45093	5.80491	5.31722	3.8407	2.1674	5.52929	5.49153	-1.44325	6.6466	3.46986	0.00178476	0.0333478
Stambp	-2.94767	-0.516449	-4.87111	-0.419384	-2.39291	-1.96803	-3.52017	-3.54613	4.9098	3.46916	0.00178773	0.0333745
Hsdl1	-1.51263	2.15318	0.292675	-0.224241	3.11805	2.1983	-1.51263	-0.189421	4.73203	3.49705	0.00178921	0.0333745
Emilin2	0	1.73849	0	3.41343	3.31548	3.66182	0	0	4.55174	3.61255	0.00179143	0.0333876
Cdo1	-1.39699	-1.39699	-1.39699	1.56496	-1.39699	-1.39699	-1.39699	-1.39699	4.33007	3.73305	0.00179424	0.0334118
Psme3ip1	4.49599	4.18547	5.29046	0	4.74892	4.06387	1.98956	0	5.14265	3.52697	0.00180039	0.0334889
Gm3255	0	0	0	0	0	0	3.70263	0	4.36842	3.81486	0.0018014	0.0334889
Srd5a1	1.14332	1.84021	0	0	0.867191	0	0	3.72568	4.40376	3.60708	0.0018129	0.0336742
Lrrc38	1.2626	3.21726	2.1386	1.1713	0	0	0	0	4.39043	3.60459	0.00182279	0.033809
Unc119	0.164187	-3.13998	-0.628736	-3.13998	1.13748	-3.13998	-3.13998	-0.467411	4.64221	3.55946	0.00182321	0.033809
4930430F08Rik	-2.04162	-0.642425	-3.18585	1.57573	-2.31666	0.727014	-0.63399	-1.99243	4.76275	3.46045	0.00182521	0.0338176
Apbb3	-1.79409	-0.464466	-2.93561	-2.93561	-2.93561	0.504217	-1.6112	-2.93561	4.46677	3.55833	0.00182787	0.0338385
Rcsd1	0	0.948915	3.29244	0	1.6912	0	0	0	4.36711	3.65625	0.00183259	0.0338976
Ddx31	1.24924	1.18502	0	0	4.0557	0	0	0	4.43195	3.65422	0.00184044	0.0340142
Sema5b	0	0	2.71583	0	0	0	0	2.89293	4.35863	3.71952	0.00184426	0.0340564
Fam171a1	-1.51069	2.51176	0.65062	0.00794547	2.7926	2.79447	-0.161067	-0.316258	4.78927	3.45506	0.00184879	0.0341116
Ints2	1.14667	5.13161	4.41886	4.40885	3.60705	3.15657	0	0	4.98033	3.51457	0.00185232	0.0341482
Zfp787	-1.48763	0.997273	-3.56934	-1.59346	-2.44109	-0.0773062	0.825773	-3.56934	4.83358	3.48146	0.00185564	0.0341808
Nadk2	-0.950279	0.18566	-0.515258	-2.08747	-1.22544	2.26932	-2.08747	0.575993	4.57026	3.48097	0.00185778	0.0341918
Spata18	1.90614	1.46496	3.62052	0	1.92793	0.981017	0	0	4.43052	3.55053	0.00186006	0.0342053
Rad18	4.12398	0	1.00502	2.06417	2.591	1.71388	0	0	4.50644	3.54765	0.00187211	0.0343765
Zfp248	0	3.11684	0	0	1.12823	0	0	0	4.34113	3.71206	0.00187248	0.0343765
Ezh2	1.97739	-3.20981	2.50296	-3.4324	1.07603	0.620091	0.412256	2.52166	6.68088	3.42057	0.00189422	0.0347346
Fry	0	3.28876	2.92723	0	0	4.19088	4.08396	0	4.67141	3.58674	0.00189513	0.0347346
Timm9	4.96232	4.83804	4.05984	1.29171	4.4276	4.31939	0	2.17555	5.13508	3.47152	0.00189931	0.0347824
Wiz	5.75242	0.959922	4.39044	4.32265	1.72175	6.01334	5.90589	5.87043	5.79123	3.44254	0.00190473	0.0348401
Zbtb43	1.34595	2.82181	3.61264	0	0	0	0	0	4.43635	3.63776	0.00190562	0.0348401
Oard1	0.849237	0.0208358	-2.43077	2.00464	1.66134	-3.74217	1.51949	-3.74217	5.42115	3.46943	0.00190862	0.0348663
Zdhhc18	0	0.936868	1.0089	1.52249	3.59365	0.981529	1.32621	0	4.41485	3.50079	0.00191177	0.0348949
Ercc6	-1.39705	-0.450039	0.408345	-1.39705	2.19616	-0.156413	-1.39705	-1.39705	4.42051	3.5371	0.0019169	0.0349597
Kctd20	-2.59805	-2.59805	-2.59805	0.276885	0.891607	-0.216614	-2.59805	-2.59805	4.47927	3.58095	0.00191924	0.0349735
Rnf180	0.588953	0.243179	0.912796	0.627418	-1.01575	-2.25426	-4.9882	-3.54606	5.67933	3.43636	0.00193294	0.0351676
Mtrr	-2.80231	0.508438	-2.80231	-2.80231	1.34824	0.559259	1.88076	-2.80231	4.78196	3.53264	0.00193616	0.0351676
Slc29a4	2.70149	0.933453	1.83344	2.84681	3.74368	0	0	0	4.5006	3.53252	0.00193667	0.0351676
Arhgap24	3.42394	4.1667	1.92007	1.84065	3.99036	0	4.1422	0	4.78042	3.49506	0.00193707	0.0351676
Pbx2	0	0	1.80561	0	3.62067	1.72336	1.34656	2.58519	4.46566	3.53225	0.00193784	0.0351676
Kif26a	-2.80545	0.963068	-2.80545	-1.51877	-1.55836	-1.8264	-2.80545	-2.80545	4.46682	3.53142	0.00194148	0.0351919
Luzp1	1.90945	3.88957	1.82047	0	0	1.87444	0	0	4.46352	3.57546	0.00194237	0.0351919
Snx11	0	1.73752	3.07747	0	0.870242	0	0	0	4.35414	3.6283	0.0019441	0.0351945
Kiss1r	1.2488	3.08644	0	0	0	0	0	0	4.34162	3.69273	0.00194763	0.0352025
Lmntd2	0	3.19374	0	1.50831	0.869814	0	0	0	4.36033	3.62706	0.0019492	0.0352025
Txndc16	3.58984	2.26106	3.05889	1.51754	-1.16002	0.139612	-1.16002	0.820407	4.78841	3.46041	0.00194932	0.0352025
Zfyve9	1.26347	2.70159	3.79094	0	0	0	3.73495	3.16686	4.59706	3.52861	0.00195375	0.0352472
Hsf4	-1.51677	0.151394	1.25927	-1.51677	2.46231	-1.51677	1.90546	-1.51677	4.56111	3.52832	0.00195499	0.0352472
Chst1	-1.45989	-1.45989	-1.45989	-1.45989	-0.331807	0.254708	0.0130076	2.38047	4.44079	3.52608	0.00196484	0.0353798
Mboat2	0	0	3.24957	3.42121	1.29795	0	2.09611	3.8376	4.56982	3.52572	0.00196642	0.0353798
Cbfa2t2	-1.38893	-2.49245	1.26627	-4.3424	-2.78616	-0.488179	0.0530838	-1.43455	5.11503	3.42899	0.00196715	0.0353798
Capg	-0.159755	-0.378969	3.0227	-0.43756	-1.6067	1.55881	-1.6067	1.85436	4.68568	3.45463	0.00197587	0.0355078
Slc25a14	-1.8354	2.70301	1.70043	-0.700376	2.32189	2.06494	-2.98442	0.471283	5.37599	3.42601	0.00198118	0.0355743
Gjb1	1.14185	0	0	0	2.84184	0	0	0	4.32096	3.6837	0.00198376	0.0355918
Dusp12	0	3.90655	2.67433	0	0.861801	3.05252	1.34591	2.6793	4.56018	3.48381	0.00198774	0.0356342
Ibtk	0.793133	2.78375	-0.0406396	-1.58339	1.04498	-0.310967	0.413879	-1.58339	4.59702	3.45133	0.00199117	0.0356667
Upp1	0	0	3.03939	0	0	0.985402	0	0	4.3298	3.68031	0.0019975	0.0357184
Tatdn3	1.87105	3.12011	0.175686	0.364261	-0.289502	0.634559	-1.15142	-1.15142	4.56501	3.44978	0.00199841	0.0357184
Osbpl7	2.10252	0	3.11664	1.16755	0.86383	3.34378	0	0	4.45927	3.51842	0.0019989	0.0357184
Plekha6	-1.42185	-0.580915	-0.495289	-0.146632	-1.26446	-6.92887	0.909732	-6.92887	6.82273	3.4492	0.00200115	0.0357298
Idnk	2.00064	0.944015	1.32906	1.52769	2.01767	0.977741	4.30544	0	4.53155	3.44709	0.00201103	0.0358772
Taf1d	4.19367	3.73723	1.91498	0	1.29427	1.23046	0	4.08927	4.69445	3.47721	0.00201806	0.0359736
Grid2ip	0	0	0	0	0	0	3.18546	0	4.32957	3.75593	0.00202001	0.0359793
Trerf1	-0.855882	-0.696492	-0.399476	-1.27831	-1.06299	-2.79198	1.90475	-2.79198	4.63544	3.44393	0.00202599	0.0360568
Trmt10b	0	1.23126	3.67996	0	0.861413	3.24554	2.11342	0	4.49391	3.51151	0.0020301	0.0360987
Pomt1	2.74295	3.73239	0	1.28599	0	0.97772	3.30522	0	4.52087	3.51118	0.00203161	0.0360987
Bpifb1	1.73969	0	3.6514	0	0	1.98752	0	1.97504	4.43949	3.55447	0.00203349	0.0361029
Slc38a1	-2.22037	1.97375	-2.05061	-3.36707	-0.239689	0.745444	-1.23718	0.649186	4.98377	3.41317	0.00204268	0.036237
Kbtbd11	-1.51377	-1.51377	-1.51377	-0.00194612	0.950681	-1.51377	2.02135	-1.51377	4.42645	3.55144	0.00204695	0.0362838
Ints11	2.44636	4.81625	0	2.45334	1.92598	2.26343	1.48761	1.32233	4.65939	3.439	0.00204947	0.0362993
Ehf	-0.266703	-0.581888	2.08878	-1.51618	1.67066	-0.53756	-1.51618	2.5793	4.59997	3.43731	0.00205761	0.0363666
Commd8	-2.38543	0.974822	-1.37302	-0.633137	1.03204	2.57444	-2.38543	1.39018	4.81218	3.43713	0.00205849	0.0363666
Tspoap1	-4.91162	0.382914	-3.895	-0.906119	-0.693549	-3.67671	-4.91162	-0.311333	5.16401	3.43696	0.0020593	0.0363666
Prrt3	-1.85202	1.94	0.30574	-3.10073	-0.0640948	-1.28174	-3.10073	0.840105	4.85761	3.43679	0.00206011	0.0363666
Tyk2	-0.260172	2.63184	0.0827977	-1.39706	0.689835	0.388928	-1.39706	-1.39706	4.51007	3.46793	0.0020615	0.0363666
Bcorl1	-1.15091	1.92947	-0.145854	0.135075	2.81986	0.721103	0.19483	-1.15091	4.52095	3.43566	0.00206556	0.0364091
Lhfpl2	3.52263	0	2.50887	1.16625	0	3.27893	0	3.83785	4.58428	3.50231	0.00207246	0.0365017
Cacna1a	5.17971	3.85742	1.26949	4.36237	4.33441	1.79389	-0.101728	4.00357	6.48142	3.38181	0.00208038	0.0365878
Eci2	3.72016	2.57951	3.96325	-0.253483	-1.30844	2.81356	1.94141	2.25593	5.88127	3.38173	0.0020808	0.0365878
Fmr1	0	5.16698	4.39674	3.44018	3.04878	3.0524	3.97086	2.68619	5.01331	3.43221	0.00208231	0.0365878
Cep70	-3.46218	-3.46218	-2.41399	-2.17385	-1.7343	-3.46218	-2.13546	-3.46218	4.39872	3.49843	0.00209057	0.0367037
Tfb2m	0	2.83608	1.91505	0	3.34044	0	1.32588	0	4.42846	3.53977	0.00209982	0.0368368
Nlrx1	0	0	0	0	0	0	0	3.21746	4.33054	3.73556	0.00210178	0.036842
Tdrd12	0	2.99725	0	0	0	0	1.35021	0	4.33576	3.65318	0.00211114	0.0369347
Ttc13	1.14121	2.70548	3.67296	1.83404	1.12797	0	1.34624	4.11315	4.59513	3.42623	0.0021117	0.0369347
Vat1l	1.24913	3.23334	0	0	0	0	2.75885	0	4.40429	3.58914	0.00211208	0.0369347
Dmtf1	2.17025	2.89605	0.220473	3.02356	4.53401	0.290388	4.11333	1.34103	6.19824	3.37287	0.00212585	0.0371065
Fignl2	0	0	2.93676	0	0	0	1.32902	0	4.32806	3.64965	0.00212641	0.0371065
Gm32208	1.14007	0	1.01006	0	3.02888	0	0	2.82511	4.39062	3.53377	0.00212754	0.0371065
Kitl	3.41873	0	3.42696	1.45694	0.861371	0	2.60364	0	4.50408	3.49039	0.00212862	0.0371065
Pik3cb	-1.51353	-1.51353	2.04832	-1.51353	-0.219718	-0.272937	-0.187423	-1.51353	4.41873	3.48725	0.00214369	0.0373086
Wdr60	-4.52246	-1.43213	-3.51453	-4.52246	-1.85137	-1.2426	-2.42106	-4.52246	4.67206	3.45047	0.0021458	0.0373086
Adgre5	1.14409	0	2.88526	0	0	0	0	2.89135	4.37617	3.58157	0.00214625	0.0373086
Bmp1	-0.14768	2.19826	1.52828	-0.110098	-1.39706	-1.39706	-1.39706	-1.39706	4.45795	3.48657	0.00214697	0.0373086
Pglyrp1	0	1.66093	3.28087	0	0.868711	0	0	1.44858	4.37938	3.5292	0.0021489	0.0373128
Arhgef2	-3.83644	0.0426182	-0.302567	-4.98082	-0.743999	-3.68795	-3.43891	-0.476777	5.18999	3.39091	0.00215392	0.0373706
Gtf2ird2	-1.50984	-1.50984	-1.50984	-1.50984	1.43304	-1.50984	-1.50984	-1.50984	4.33822	3.64279	0.00215636	0.0373836
Mapkapk3	0	1.22905	3.67478	0	1.12803	2.41898	0	1.97829	4.45646	3.48292	0.0021646	0.0374971
Mtmr14	1.99809	0	3.28215	1.5161	0	3.97343	0	1.76747	4.5379	3.48213	0.00216846	0.0375306
Gabra4	1.14142	0	0	0	0	3.16139	0	0	4.34428	3.63972	0.00216993	0.0375306
Dpysl5	0	0	0	0	0	1.72393	2.7138	3.00266	4.39086	3.5756	0.00217358	0.0375643
Ank3	0.0448581	4.27005	4.19588	3.20767	3.32709	2.54004	5.09926	-0.742741	6.39839	3.36245	0.00218013	0.0376191
Trim3	0.397748	1.48519	-1.51057	-1.51057	2.27766	2.9555	2.72976	-0.186477	4.79319	3.4126	0.00218015	0.0376191
Trmt10a	0	0	3.08225	0	0	1.92323	0	0	4.35559	3.63502	0.00219088	0.0377743
Mon1a	3.38611	0	0	1.16909	2.67458	0	2.09661	0	4.4379	3.52	0.00219257	0.0377743
Gm28154	0	0	0	0	0	3.63219	0	0	4.37166	3.71315	0.00219566	0.0377982
Ctnna2	0.098743	-0.21739	2.02045	-1.15084	-1.15084	-1.15084	2.29359	1.85485	4.49758	3.4399	0.0021985	0.0378176
Prdm5	-2.29805	-3.44145	-3.44145	-3.44145	-3.44145	-1.45098	-2.09313	-3.44145	4.40127	3.51778	0.0022032	0.037869
Tti2	0	3.21587	3.50804	2.48178	0	0.977848	1.32354	0	4.49077	3.47449	0.00220594	0.0378866
Rcbtb1	1.24874	3.1994	4.54367	1.17466	3.60269	1.26556	4.65993	2.07922	4.84202	3.38051	0.00220796	0.0378919
Smpdl3b	-1.15943	-1.15943	-1.15943	-1.15943	0.188133	-1.15943	0.312416	2.00515	4.36128	3.51483	0.0022175	0.0379982
Samd10	0	1.66816	0	0	1.35256	2.65446	3.60073	3.97244	4.56377	3.47215	0.00221759	0.0379982
Pitpnc1	0	1.46085	3.02066	3.762	3.11547	1.74934	0	0	4.53203	3.47152	0.00222071	0.0380221
Cibar1	3.81692	4.5002	2.67213	3.5311	3.96419	2.82741	-1.54723	5.74811	6.08108	3.37654	0.00222896	0.0381339
Hoxa3	1.24893	0	3.18317	0	0	0	1.50444	0	4.36198	3.56284	0.00223316	0.038147
Zmym3	1.97058	1.90948	2.70741	3.4213	4.25283	1.53646	-3.10699	1.28358	6.22857	3.37543	0.00223486	0.038147
Lrtm2	2.00998	3.76658	0	0	0	1.58036	3.44636	1.6447	4.53205	3.46868	0.0022349	0.038147
Snap23	-4.09187	-4.09187	-0.136816	-0.44574	-0.776486	-4.09187	-2.74196	0.0735066	4.80616	3.43197	0.00223891	0.0381646
Trim5	-2.25546	-0.533489	-0.530258	-3.60429	-3.60429	-2.29602	-3.60429	-3.60429	4.5192	3.46779	0.00223939	0.0381646
Pdia5	-0.0151949	-0.14176	-2.94289	-2.94289	0.792607	0.885073	-2.94289	-2.94289	4.65599	3.46716	0.00224259	0.0381771
Uvrag	2.29295	1.45565	0	1.28717	3.7738	0	1.34708	0	4.45191	3.46696	0.00224358	0.0381771
Mlh1	-1.95635	1.26535	-1.95635	-1.95635	-1.95635	-0.375982	2.03192	0.0210439	4.53171	3.46647	0.00224605	0.0381898
Khdrbs2	0	1.18741	1.34623	0	2.22574	0	4.02827	2.40643	4.49337	3.46562	0.00225033	0.0382331
Celf6	-3.65257	-1.57983	-2.09685	-4.99142	-1.57416	-0.499015	-4.99142	0.322441	5.10237	3.39735	0.00225945	0.0383586
Wrn	-2.59087	-1.83023	-2.72578	0.428219	-0.493296	-2.50132	-3.73271	-3.73271	4.63151	3.39698	0.00226141	0.0383625
Zfp667	-0.560406	2.8761	-0.580896	-1.90615	0.969307	1.25125	-0.355621	-0.715516	4.69721	3.36799	0.00227482	0.0385603
Rhot1	3.12413	3.57782	3.82713	0.0118733	4.05688	-1.16857	3.6181	2.65104	5.29759	3.36691	0.00228066	0.0386297
Tbc1d9b	-1.80282	1.18903	-0.919759	-2.25756	1.15092	-2.32245	-2.1971	1.20608	5.00166	3.34306	0.00228481	0.0386444
Kmt5c	1.14469	2.31146	1.80511	1.17308	3.98436	3.97914	4.74545	0	4.78532	3.39254	0.00228503	0.0386444
Cfb	3.34521	2.70406	3.64062	1.16541	0	0.97769	0	0	4.50739	3.45827	0.00228779	0.0386616
Gm9222	0	3.08629	0	0	0	1.228	0	0	4.34292	3.61316	0.00229091	0.0386847
Rbm45	0.92303	-1.60435	-1.60435	-1.60435	-1.60435	-1.60435	1.50229	-0.41253	4.40127	3.49831	0.00229906	0.0387887
Tmem164	0	3.28646	3.27858	0	1.128	0	2.28682	0	4.4648	3.49801	0.00230058	0.0387887
Sh3d21	0	1.18181	3.0674	0	0	0	0	0	4.33735	3.60957	0.00230778	0.038853
Fcho1	-1.87253	0.171289	-2.87544	0.79936	-2.77029	-4.32626	0.387427	-2.32891	5.08244	3.36191	0.00230803	0.038853
Gm31305	0	3.32861	0	1.52181	1.293	0	1.54957	0	4.40311	3.49621	0.00230966	0.038853
Tia1	-2.23312	0.433083	-1.66337	0.192931	1.07049	-2.40304	2.75694	0.994687	5.29828	3.33793	0.0023133	0.0388689
Abi2	2.74727	8.00962	6.72459	6.28846	7.23638	5.85793	5.4907	6.73025	6.96791	3.3608	0.00231413	0.0388689
Stox2	-0.251183	1.29249	3.68239	0.623228	1.51818	3.70979	4.21454	3.69166	5.35559	3.33672	0.00232009	0.0389395
Mre11a	-3.45281	-2.50855	0.453831	-3.45281	-1.56283	-3.45281	-3.45281	-0.252113	4.56185	3.45133	0.00232371	0.0389706
Sytl1	0	0	2.8753	0	0	1.07578	0	0	4.32309	3.60372	0.00233558	0.039089
Phactr2	3.5108	5.13586	5.46414	5.00632	3.01302	2.23787	3.06322	0	5.22604	3.38312	0.002336	0.039089
Rab3d	-0.0128491	3.32288	1.51369	0.351651	2.85648	1.21082	0.192102	-1.15566	4.70058	3.35684	0.00233607	0.039089
Zkscan6	0.772428	-4.28861	-0.160851	-2.04643	-3.41084	0.323626	-2.74701	1.10763	5.21937	3.35632	0.00233897	0.0391078
Ntng1	2.15918	-1.35405	2.29974	-2.56407	-0.602358	0.163188	-0.864493	1.93593	5.78756	3.33257	0.00234349	0.0391539
Fmnl2	3.72683	2.66339	2.15644	3.33811	2.60294	0.356009	-1.16365	-1.16365	4.93548	3.38023	0.00235188	0.0392643
Esco1	1.45749	1.08023	-0.116562	-3.78546	1.4708	-1.37943	-2.24627	2.02257	5.44135	3.35201	0.00236313	0.0394223
Lrrc14	-1.51393	-1.51393	-0.505588	-0.226246	1.42292	-1.51393	-1.51393	1.82638	4.43197	3.44291	0.00236811	0.0394599
Gm13167	0	0.948022	3.29061	2.28273	0	0	0	1.4674	4.39309	3.48409	0.00237177	0.0394599
Gm20875	0	0.948022	3.29061	2.28273	0	0	0	1.4674	4.39309	3.48409	0.00237177	0.0394599
Tmem219	2.46173	4.26464	4.25156	0	3.60307	4.78352	1.47093	1.46466	4.91066	3.37641	0.002373	0.0394599
Bahcc1	0	3.49985	2.80237	2.26608	0	0	0	2.18348	4.47718	3.48352	0.00237472	0.0394599
Apc2	0	0.95056	0	0	2.71213	0	0	0	4.313	3.59531	0.00237609	0.0394599
Pfkfb3	-4.58036	-0.126359	-0.00250657	-3.06771	0.363631	-4.58036	-0.339021	-4.58036	5.11288	3.40539	0.00237987	0.039493
Zscan2	1.44816	0	3.16501	0	0	3.35511	1.34638	0	4.44842	3.48133	0.0023861	0.0395518
Ambra1	-1.27312	0.946456	-0.264637	-1.81211	-3.09833	-2.0262	-3.09833	-1.77691	4.5691	3.37388	0.00238712	0.0395518
Naf1	-0.376613	-1.72103	-1.72103	1.61933	-1.72103	0.00288323	-1.72103	-1.72103	4.3931	3.48049	0.0023905	0.0395518
Gm9358	0	2.72635	0	2.26393	0	1.27046	3.25286	0	4.44389	3.48048	0.00239057	0.0395518
Lsamp	0	2.99106	1.94198	0	1.34134	1.58031	3.86028	0	4.50623	3.43764	0.00239632	0.0396019
Ttll5	5.3768	5.17962	1.80273	0	5.24432	4.59176	5.02984	1.32617	5.3964	3.37209	0.00239719	0.0396019
Sytl2	1.24956	4.12481	1.94177	0	0	0	2.235	0	4.49103	3.47604	0.00241391	0.0398074
Mras	-0.610955	0.404266	-0.0150594	-3.57019	-3.57019	-2.58861	-3.57019	-0.0630599	4.71396	3.39906	0.00241471	0.0398074
Cntn3	0.189616	-1.1559	2.41013	-1.1559	0.535489	-1.1559	0.316792	-1.1559	4.42045	3.43418	0.00241503	0.0398074
Cyba	0	2.07847	3.26664	0	1.54877	0	2.5656	0	4.42672	3.47543	0.00241713	0.0398124
Socs6	5.22807	2.33687	3.66018	0	1.32324	4.33226	4.62701	3.91294	5.06717	3.36731	0.00242415	0.0398712
Hvcn1	0	0	2.95887	0	0	0	1.32741	2.69385	4.3775	3.52413	0.0024243	0.0398712
Entpd5	-1.39704	-1.39704	-0.386887	0.578075	-1.39704	-1.39704	-1.39704	2.00435	4.38896	3.4723	0.00243375	0.0399967
Spatc1	0	2.52167	0	0	2.83883	0	0	0	4.3529	3.5827	0.00243822	0.0400404
Uaca	0	3.2932	0	1.45292	0	1.30107	0	0	4.37685	3.52108	0.00244008	0.0400413
Tent2	-1.05985	1.17246	0.916631	-2.79793	-1.45296	-2.79793	1.50459	-1.3489	4.72974	3.36409	0.00244253	0.0400517
Nudt17	2.01694	-1.46071	-0.454288	-0.174013	-0.597464	-1.46071	-0.11417	1.61347	4.46649	3.36335	0.00244677	0.0400915
Eftud2	4.19771	2.86705	0	2.85563	1.67544	3.12879	0	4.17506	4.72573	3.39299	0.00244868	0.040093
Rcan3	-0.362941	-1.71182	1.95358	-1.71182	0.694158	-1.71182	1.28535	-1.71182	4.49741	3.42757	0.00245114	0.0401036
Poli	0	3.10492	1.94189	3.66753	0	3.35104	0	0	4.5396	3.46801	0.00245672	0.0401319
A130010J15Rik	1.24957	1.94802	1.00508	0	3.58538	3.83619	0	0	4.53163	3.42654	0.00245681	0.0401319
Aff3	-1.46116	2.00459	-1.46116	-1.46116	0.995891	-1.46116	-1.46116	1.93522	4.48434	3.46772	0.00245831	0.0401319
Rnf138	-1.24493	0.287965	-2.38688	0.252092	1.61335	-1.15936	2.39703	1.74927	4.84762	3.33471	0.00246256	0.0401715
Izumo4	3.04263	-1.45989	2.20662	-1.45989	-0.214222	0.335043	0.691688	1.5965	4.67928	3.35996	0.00246626	0.0402023
Deaf1	3.02662	-0.0329768	2.52885	-0.237034	3.9437	3.39996	-1.73671	2.84321	5.32951	3.33354	0.00246945	0.0402245
Nat2	0	0	2.61163	3.93883	0	0.978773	1.34636	2.15721	4.47174	3.42363	0.00247295	0.0402273
Zfp54	3.64955	4.61807	4.48028	0	0.872378	1.98542	2.11315	3.58131	4.85748	3.35875	0.00247326	0.0402273
Zfp707	1.14023	0	1.32314	0	0.868475	3.42973	0	0	4.38417	3.46456	0.00247538	0.0402322
Abhd14a	1.34582	3.62938	0	0	0.865858	1.9259	1.34767	0	4.43101	3.42139	0.00248541	0.0403147
Acaca	-4.0617	-1.15401	0.152576	-2.29079	-4.60519	0.0301942	-2.48076	-1.52661	5.45881	3.30822	0.0024857	0.0403147
Nf2	4.11285	1.47	2.61133	2.02485	0	0	3.66906	1.45086	4.59944	3.38642	0.00248593	0.0403147
Nt5c	1.83753	2.10165	1.04638	1.45525	1.34902	1.2311	3.8644	4.44565	4.64836	3.32855	0.00249897	0.0404965
Rnf183	0	1.27163	2.1955	0	0.86535	1.24115	3.84001	0	4.44332	3.41656	0.00251254	0.0406866
Polb	-3.22887	-0.884101	-3.22887	0.404204	0.53872	-1.9968	-1.90487	-3.22887	4.58985	3.37801	0.00253443	0.0409815
Bbs9	3.25189	1.18731	3.38024	0	3.80492	0.977863	0	0	4.55284	3.4127	0.00253446	0.0409815
Tfcp2	-2.79361	-4.05704	-1.02902	-4.05704	-1.46341	-4.05704	-2.58349	-0.510787	4.60451	3.37646	0.00254351	0.0410978
Zfp30	-1.15736	2.1665	-0.109047	-1.15736	-1.15736	1.23108	-1.15736	-1.15736	4.39591	3.45105	0.0025497	0.0411421
Micu1	-0.807007	1.0213	-3.07352	-4.38897	-1.89308	-1.1272	-0.0297098	-1.92048	5.07381	3.31987	0.00255119	0.0411421
Scube3	0	0	0	1.16985	3.76588	0	1.55014	1.19107	4.41676	3.53238	0.00255184	0.0411421
D2hgdh	2.57341	0.134751	2.82808	-0.432813	-1.60378	0.977369	1.63504	-1.60378	4.73408	3.34415	0.00255933	0.0412255
Erf	1.82661	0.449301	-2.3758	-0.17348	1.56573	-2.3758	-2.3758	0.0777413	4.68053	3.37352	0.00256074	0.0412255
Atp10a	-0.0159629	0.117531	2.60476	-1.15454	-1.15454	0.559958	0.318485	-1.15454	4.44702	3.37275	0.00256527	0.0412684
Appl2	2.51524	-0.304555	-1.71556	-0.163896	1.75705	0.281303	-2.76817	0.901605	4.99995	3.31707	0.00256829	0.0412795
Rpap1	0	3.28404	1.32755	2.11152	0.861384	0	3.76167	1.18665	4.50814	3.372	0.0025697	0.0412795
Atg13	-0.321333	0.303429	0.47659	0.562054	1.98801	-3.86023	-3.86023	0.249363	5.30163	3.34192	0.00257278	0.041299
Sorcs2	-0.173671	1.94455	1.70382	1.29616	-1.04305	0.386199	-2.39077	-2.39077	4.77767	3.34133	0.00257632	0.041322
Etfbkmt	3.83815	3.37817	1.32875	0	0	1.27298	3.17647	0	4.5611	3.40513	0.00257795	0.041322
Dixdc1	3.84816	5.51264	3.40386	2.35971	1.68687	3.55159	1.33036	2.74746	4.96403	3.31454	0.00258384	0.0413863
E430024I08Rik	3.09237	2.0268	0	1.16549	0	3.51687	0	3.49638	4.54177	3.40368	0.00258639	0.0413973
Rabgap1l	0.0949372	0.590883	2.28344	-1.15443	0.574532	-1.15443	2.83092	2.64539	4.63757	3.33897	0.00259061	0.0414132
Anks6	-1.15553	1.702	2.13257	-1.15553	-1.15553	-1.15553	0.928856	-1.15553	4.42901	3.4437	0.00259113	0.0414132
Ankrd13c	1.34582	3.44566	4.50691	1.1693	1.54864	3.51004	1.32583	1.9789	4.69258	3.3127	0.00259517	0.0414476
Fcnb	-1.51002	-1.51002	1.52872	-1.51002	-1.51002	-1.51002	-1.51002	-1.51002	4.34097	3.54952	0.00260969	0.0416431
Eml6	3.88741	1.83747	-0.341985	3.36421	1.69176	0.351918	4.23553	2.93049	5.29343	3.28787	0.00261117	0.0416431
Tdpoz1	0	0	0	0	1.34972	0	3.16663	0	4.34123	3.54846	0.00261536	0.0416498
Tdpoz9	0	0	0	0	1.34972	0	3.16663	0	4.34123	3.54846	0.00261536	0.0416498
Col27a1	-0.340229	1.10779	-2.85958	0.443098	-2.03312	-4.1902	-2.7069	1.07637	5.21239	3.30897	0.00261839	0.041651
Tfpt	1.34812	3.16825	0	0	2.41564	1.99045	4.23783	1.97342	4.59074	3.36369	0.00261926	0.041651
Lrch1	-0.202265	-0.143389	-2.52015	-3.57208	-0.817701	-0.301113	-2.24204	1.78947	4.92771	3.30844	0.00262165	0.041651
Mthfsd	0.373151	0.566523	-1.46096	3.06602	-0.109274	0.920771	-1.46096	-0.0100633	4.59452	3.33367	0.00262297	0.041651
Gm32771	-3.16076	-0.0524548	0.55716	-3.16076	-3.16076	-0.00647065	-3.16076	-3.16076	4.56889	3.43689	0.00263011	0.0417343
Trmt2a	0.0490969	-1.5829	-3.21752	-4.26452	-3.13644	-1.65487	-4.26452	-3.07425	4.68138	3.33134	0.00263738	0.0418197
Ccdc91	-5.1494	-2.3216	-1.48933	-6.29934	-2.18911	-3.10581	-0.575281	-2.88679	5.49922	3.30337	0.00265355	0.0419814
Gm13237	-1.45923	-1.45923	1.8306	0.822932	-1.45923	-1.45923	-1.45923	0.00847507	4.40187	3.43277	0.00265395	0.0419814
Tle2	5.17527	5.54114	4.54755	4.41944	0.882764	4.24851	2.08786	6.00592	5.55364	3.30315	0.00265495	0.0419814
Pnldc1	0	0	2.61906	0	0.868074	0	0	3.38176	4.39134	3.48133	0.00265518	0.0419814
Htatip2	1.70586	2.96149	2.35493	-0.106284	-1.39696	1.3591	-0.066923	3.89001	4.92703	3.30086	0.00266946	0.0421771
Pira2	0	0	2.88929	0	0	0	0	0	4.31425	3.60969	0.00268841	0.0423856
Fam107a	-3.23542	-0.272991	-3.23542	-3.23542	-1.88884	-2.16169	-3.23542	-3.23542	4.41973	3.42683	0.0026887	0.0423856
Napg	-1.05101	-3.63308	-3.48495	-0.729432	-2.73128	-2.70367	-3.76752	-1.97786	4.92728	3.27565	0.0026895	0.0423856
Lama5	1.83838	0	0	1.17129	2.82008	0	2.72334	0	4.39052	3.42656	0.00269033	0.0423856
Rnf13	0	3.63143	3.67817	3.45083	2.70905	0	3.89214	3.85076	4.78431	3.34913	0.00270848	0.0426412
Peli3	0	1.18418	0	0	2.31419	0	3.4178	1.32311	4.40133	3.42241	0.00271489	0.0427117
Zfp229	1.3164	-0.640922	1.27688	-1.58487	-1.58487	-1.58487	-1.58487	2.08242	4.49622	3.37925	0.00273248	0.0429579
Thoc6	0	0	0	0	0	0	2.2308	2.89434	4.3461	3.52651	0.00273579	0.0429579
Cracd	-1.55783	-0.368015	-2.6155	-3.93241	-1.99016	0.0112497	-2.44791	1.49945	4.949	3.29048	0.00273637	0.0429579
Adamts9	-1.397	-1.397	-1.397	1.63431	-1.397	-0.411928	-1.397	-1.397	4.34028	3.46597	0.00274336	0.043037
Cgnl1	-1.59724	-1.66998	-3.50405	-3.50405	-0.0789674	-3.50405	-3.50405	-1.0564	4.51315	3.37653	0.00274928	0.0430994
Rnf212b	3.25088	0	0	1.83789	0	1.30297	0	2.45549	4.40904	3.41525	0.00275788	0.0431736
Zfp52	0.585954	2.84936	0.420685	-1.1512	0.189727	-1.1512	0.356916	2.28068	4.55643	3.31227	0.00275792	0.0431736
Sybu	-0.0759179	1.52038	1.96173	-0.144293	2.9626	-2.18311	2.42829	-1.28775	5.52075	3.26412	0.00276558	0.0432629
Rars2	0.111502	1.11444	1.55459	0.134409	3.25188	-0.173489	1.0659	-1.15199	4.59074	3.28565	0.00276806	0.0432711
Tprkb	0.613004	0.184619	1.53592	-2.189	0.643922	-3.36481	-3.36481	-1.91799	4.90525	3.31024	0.00277108	0.0432876
Xpot	-0.00302115	-1.13957	0.174078	-2.70631	0.475298	-2.04163	-4.21036	-4.21036	4.96657	3.30932	0.00277711	0.0433512
Slc9a8	-1.68923	-2.47959	0.919763	0.92339	-1.11156	-2.15994	-1.27701	-3.42801	4.74997	3.28365	0.00278125	0.0433852
Arhgap39	0	0.933462	1.3463	1.1654	1.34135	3.43109	0	3.70548	4.50444	3.3372	0.00278383	0.0433947
Adgb	2.24188	-0.220063	-0.147846	0.130484	-1.15826	-1.15826	-1.15826	-1.15826	4.38139	3.37043	0.00278726	0.0434176
Map3k10	-0.837221	1.10401	2.17558	-0.186458	0.585876	-0.126201	-2.02333	-4.63973	5.8215	3.28245	0.00278925	0.043418
Tspan12	-3.94411	-0.985769	-1.52616	-3.94411	-3.94411	-2.01551	-1.7743	-3.94411	4.537	3.36757	0.00280527	0.0436366
Ercc2	-1.15798	0.025666	1.97229	1.08895	-1.15798	-1.15798	-1.15798	-1.15798	4.3873	3.40641	0.00281185	0.0437082
Otogl	0	0	1.32028	1.84075	0	0	0	3.06332	4.35605	3.45337	0.00281791	0.0437569
Nek10	0	0	3.03861	1.50268	0	0	0	0	4.3421	3.51191	0.00281902	0.0437569
Lrrc40	-1.111	-2.24843	0.00538314	-0.73334	-2.24843	1.73302	1.54238	-2.24843	4.59468	3.33123	0.00282229	0.0437569
Myo9a	0.35342	-0.925222	0.220471	-2.43412	1.35282	-4.67884	-4.67884	0.519741	5.51212	3.30234	0.0028229	0.0437569
Eif1ad	3.4241	0	3.22837	0	3.51064	2.15255	0	1.18686	4.55347	3.36406	0.00282754	0.0437982
Bnc2	1.14455	1.17771	0	1.17207	3.11869	0	0	0	4.35909	3.40327	0.0028313	0.0438257
Ppil2	-3.72798	-3.72798	-2.40159	-3.72798	-1.88206	-0.158738	-0.140058	-2.40631	4.60359	3.32926	0.00283511	0.0438305
Trmt11	0	0	2.97188	1.83976	0	1.9409	1.3275	0	4.37419	3.40258	0.00283558	0.0438305
Jag2	0	0	1.82078	2.12565	1.6662	4.1446	1.34581	0	4.49121	3.36161	0.00284318	0.0439173
Cep44	3.88135	3.29456	4.58347	3.30867	0	1.07427	1.54915	0	4.73429	3.32754	0.00284633	0.0439353
Usp48	-0.228864	-0.193263	0.455711	-5.68438	-4.37668	-0.02917	-4.20457	-1.22881	5.82513	3.27272	0.00285471	0.0440338
Gpr173	-2.73297	0.450221	-2.73297	-1.20517	-2.73297	-2.73297	-1.40956	0.721869	4.49706	3.35803	0.00286614	0.0441793
Mro	-3.80952	-0.49283	-2.8043	-2.35272	-3.80952	-0.664483	-3.80952	-2.48822	4.55367	3.32371	0.00287153	0.0442316
Relt	2.57887	-0.507955	2.65524	-1.45786	1.36687	-1.45786	3.02099	1.55843	4.80498	3.29362	0.00288124	0.0443503
Pikfyve	-0.0490698	3.23036	2.417	-1.06138	1.98774	0.809347	3.24181	-1.02736	5.33163	3.24587	0.00289046	0.0444519
Pcsk5	2.24323	2.31421	-1.15117	-1.15117	-0.289496	1.13703	-1.15117	-1.15117	4.48944	3.35406	0.00289187	0.0444519
Mgmt	2.05439	-1.16059	-1.16059	-1.16059	-1.16059	-1.16059	-1.16059	-1.16059	4.34572	3.49907	0.00289436	0.0444592
Cmtm3	0	1.66104	0	0	3.02286	1.26709	0	0	4.35867	3.43775	0.00291322	0.0447179
Zkscan3	2.40009	0.943296	-1.1617	-1.1617	1.91706	3.46051	0.935802	3.49227	4.84014	3.28811	0.00291867	0.0447704
Paqr7	-1.58183	2.43874	-1.58183	2.2739	-1.58183	0.213221	0.570053	1.30211	4.63108	3.31491	0.00293031	0.0449179
Insr	0.589772	1.267	1.15406	-1.21217	2.70274	-2.38699	0.37564	-0.506964	4.8504	3.25995	0.00294297	0.0450697
Nek6	-1.8949	-1.49031	-0.473506	-5.29135	-0.307346	-1.76914	-5.29135	-5.29135	5.17774	3.31267	0.0029454	0.0450697
Lpp	2.53469	-1.71801	1.56989	0.0276414	2.39954	-1.71801	-0.370374	0.257148	4.68981	3.2839	0.00294763	0.0450697
Parp8	-0.655178	1.73638	-0.580081	-1.49235	-0.0572711	1.48602	-3.6024	1.2685	5.23147	3.25918	0.00294837	0.0450697
Zfp410	-0.644019	2.78493	-0.580265	-2.38406	-0.0641297	0.876827	-0.879972	0.700172	4.79182	3.25861	0.00295238	0.0450905
Rbbp5	2.71975	1.38751	-1.79728	-1.63502	1.56698	1.39392	0.499754	-1.25848	5.12509	3.23691	0.00295381	0.0450905
Ndufaf5	1.14144	0	3.03841	1.28967	0	0	0	0	4.34386	3.43075	0.00295697	0.0450905
Cep19	2.29038	0	1.84897	0	0	0	3.19899	2.88631	4.44088	3.38324	0.00295856	0.0450905
Arhgap26	2.86963	2.46625	0	2.20481	3.93795	1.27324	0	0	4.53879	3.34373	0.00295993	0.0450905
Enkd1	-1.95916	1.36491	-0.910739	-1.95916	-1.95916	-0.657176	-1.95916	-1.95916	4.39351	3.38145	0.00297018	0.0452155
Gtf2h2	2.3815	2.98247	-1.1526	0.958409	-1.1526	0.77502	0.400161	0.418195	4.61009	3.27893	0.00298217	0.0453668
1700003M07Rik	0	0	0	0	0	0	0	2.83228	4.30933	3.55642	0.00298516	0.045381
L3mbtl3	-3.13768	-0.582943	0.210645	-3.79574	0.147859	-1.33216	-2.88868	-3.42243	5.23861	3.23076	0.00299806	0.045531
Elk3	1.24921	2.54461	0	0	0	3.40128	0	1.4683	4.42514	3.37703	0.00299915	0.045531
Gcfc2	0.661364	-0.767433	-3.08721	-1.92113	-3.08721	0.433227	-1.74115	-3.08721	4.57531	3.30321	0.00301025	0.045654
D130020L05Rik	1.45318	3.90908	0	1.97365	0	1.79523	2.15237	0	4.49445	3.33594	0.00301228	0.045654
Als2cl	1.26237	0	3.18308	1.28914	0	0.983798	0	0	4.36297	3.37487	0.00301345	0.045654
Zfp27	1.99577	1.27059	0	3.5627	0	0.9813	1.34785	0	4.42136	3.33502	0.00301855	0.0457
Brpf1	0.255017	-4.47529	-0.448567	-3.18481	-0.870574	-3.17845	-2.99049	-2.33688	4.89879	3.24791	0.00302866	0.0458168
Dpp10	1.3441	0	0	0	0	2.56868	3.06752	0	4.38587	3.41888	0.00303269	0.0458168
Pafah2	-3.57618	-2.62791	-3.57618	-3.57618	-1.83836	-3.57618	-3.57618	-3.57618	4.38741	3.41841	0.00303573	0.0458168
Grik2	3.77917	-1.59177	0.807028	-0.0792613	2.27596	2.12633	1.97254	3.53059	5.12608	3.24687	0.00303617	0.0458168
Txlng	1.0105	-0.365836	1.25897	-1.69185	2.30935	-1.64155	-0.0441125	-0.695828	4.94148	3.22534	0.00303762	0.0458168
Myo5c	-1.156	2.16889	-1.156	1.28485	0.0890982	-1.156	0.191905	-1.156	4.4184	3.33207	0.0030387	0.0458168
Lrig2	-0.575189	-1.54762	0.937806	-3.28336	1.5995	0.73005	-3.28336	0.843013	4.9808	3.26982	0.00304661	0.0458901
Kntc1	1.44149	0	0	0	3.32006	0	0	0	4.36594	3.47396	0.00304771	0.0458901
Rasgef1c	0	0	1.04901	0	1.29143	0	1.54831	3.25835	4.37614	3.36936	0.00305012	0.045895
Mid2	1.2495	3.49508	3.20136	0	1.24756	1.23207	0	4.02182	4.58955	3.29664	0.00305608	0.0459535
Gmeb2	-2.18432	2.82921	1.17982	-0.68575	2.28871	1.55733	2.59123	-0.720825	5.06799	3.24143	0.00307585	0.0461949
Aasdh	0	1.99956	0	1.16734	3.1885	3.35361	0	1.32193	4.46203	3.3266	0.00307632	0.0461949
Agbl4	-0.898811	-3.35647	1.18308	-3.35647	-2.488	-1.29538	0.630389	-0.465722	4.74788	3.2648	0.00308268	0.046259
Zfp362	-3.85542	-1.31645	-1.93065	-3.85542	1.14997	-0.239109	-0.208708	-0.246913	4.92729	3.26387	0.00308942	0.0463287
Tsku	1.82212	3.54724	0	1.28604	3.92746	0.977827	0	1.6445	4.55097	3.2913	0.00309391	0.0463646
Zc2hc1c	0	0	0	2.42643	0.868578	3.15945	0	1.19289	4.38203	3.36169	0.00310188	0.0464526
Mfhas1	0.332497	-1.43555	-2.36907	-2.36907	0.529098	-2.36907	-1.04561	1.58101	4.53292	3.28913	0.00310939	0.0465335
Zfp639	-2.34215	0.566948	-3.68395	-3.68395	0.803528	-0.0783138	-1.48151	-2.23654	4.83299	3.26032	0.00311525	0.0465897
Grpel2	3.52836	2.53887	0	0	3.47209	2.36015	0	3.69873	4.61401	3.31952	0.00312579	0.0467156
Whamm	-2.96958	-2.96958	-2.96958	-2.96958	-2.96958	-2.96958	-2.96958	-1.34254	4.33895	3.46109	0.00312944	0.0467365
Tmco3	-1.76616	-1.00221	-0.750359	-4.22017	-2.67289	-4.22017	-2.89534	-3.03126	4.63318	3.25811	0.00313142	0.0467365
Atr	-2.60438	0.19889	-2.60438	-2.60438	-2.60438	-2.60438	0.361324	-1.1548	4.42633	3.35514	0.00314688	0.0469357
Fbxo31	2.51367	3.28763	2.15015	3.66674	3.04049	0	0	0	4.57313	3.31553	0.00315403	0.0470105
Smap2	-4.07735	0.222313	0.85436	-0.801519	-0.0800165	-0.0947514	-1.52477	-4.07735	5.05815	3.25394	0.00316225	0.0471013
1700029J07Rik	1.14181	0.940306	0	0	2.84164	0	0	0	4.32801	3.39894	0.0031644	0.0471016
Rpgr	1.14409	0	1.3228	1.17193	0	0	3.36742	0	4.37613	3.3519	0.00316936	0.0471188
Cfap44	0	0	0	1.17253	0	2.96717	1.9847	1.19374	4.36421	3.35183	0.00316982	0.0471188
Nell2	2.70537	3.30046	0	0	1.93564	0.981119	0	0	4.42705	3.35041	0.00317975	0.0472347
Champ1	-2.28887	-2.28887	0.122307	2.21255	-0.640745	-0.634232	-0.290695	0.922446	4.63493	3.25084	0.00318529	0.0472852
Phf20	-1.27757	-0.585579	-1.39738	-2.66277	-2.54391	-1.76633	-6.73669	0.21517	6.27212	3.22591	0.00319178	0.0473497
Zfp143	3.2518	0.93355	1.00512	0	2.26388	1.23251	4.16129	1.32126	4.54875	3.24963	0.00319438	0.0473565
Usp10	-1.17953	-1.58993	-3.32728	0.444588	0.72957	-1.16333	-3.32728	1.15873	4.79641	3.24737	0.00321133	0.0475759
Ssh1	-3.5362	-3.5362	-2.4884	-3.5362	-1.86147	-2.55444	-2.20982	-2.06828	4.40914	3.27469	0.00321448	0.0475907
Hpcal1	-0.529358	-0.260877	-3.97819	0.921211	0.255594	-5.28429	0.161235	-2.04539	5.75912	3.22052	0.00323306	0.0478337
Tmem171	0	2.86493	1.05082	0	0	0	0	0	4.32401	3.44369	0.00324356	0.0479471
Cr2	2.6175	-0.285855	-1.51673	-1.51673	-0.388788	-1.51673	-1.51673	0.630552	4.4861	3.3029	0.00324506	0.0479471
Pibf1	1.24913	3.11387	3.07308	0	2.138	1.87882	4.86988	3.0589	4.723	3.24145	0.00325622	0.0480798
Flrt2	-5.11503	-0.649359	-0.0147308	-1.96038	-4.23892	-2.21004	-1.25722	-3.78924	5.09595	3.21693	0.00326091	0.0481169
Nek1	5.29747	3.43901	2.95367	4.5404	0.87481	3.03704	1.35153	3.80288	4.99374	3.21622	0.0032664	0.0481658
Stard3	2.57845	0.944353	3.99767	1.16595	1.54583	1.24293	0	3.54884	4.56836	3.23913	0.00327405	0.0482464
Glyctk	3.93024	3.3483	0	1.52769	2.12783	0	0	1.4513	4.5337	3.29838	0.00327826	0.0482744
Aldh5a1	3.09731	0.948713	0	0	0	0	1.32754	1.99562	4.37281	3.33624	0.00328033	0.0482744
Pkd1l3	4.48	6.10566	4.23321	2.59517	2.05201	4.36213	6.13698	5.24355	5.66775	3.21416	0.00328251	0.0482744
Apaf1	0	0	2.80487	0	0	1.22764	0	0	4.32425	3.43697	0.0032888	0.0483202
Gria2	-4.67129	-0.976146	0.699037	-5.92702	1.10781	0.133166	0.0998897	0.696824	6.51731	3.21272	0.0032938	0.0483202
Malt1	0	3.31806	3.56264	1.28652	0	0.978746	1.32419	0	4.47224	3.29601	0.00329588	0.0483202
Nrp1	-1.39706	2.31281	0.569657	0.11078	-1.39706	-1.39706	-1.39706	-1.39706	4.44175	3.33405	0.00329617	0.0483202
Hpgds	0	2.5403	4.30761	1.16805	2.78386	2.57675	3.49903	0	4.64489	3.26374	0.00329655	0.0483202
Dus3l	0.379277	-2.3786	-2.3786	0.476868	-1.25047	-2.3786	-2.3786	-2.3786	4.40353	3.33363	0.00329917	0.0483266
Gria3	-3.8718	0.152892	-0.7068	-3.8718	-1.40941	-2.89149	-1.70285	-2.42179	4.66035	3.23495	0.00330629	0.0483571
Slc35c2	-3.93921	1.19987	1.10504	1.70094	0.335785	-0.472201	-1.82438	-3.93921	5.33905	3.23481	0.00330738	0.0483571
Mfsd10	-3.08736	-4.33638	-1.26138	-1.18829	0.0204519	-3.09692	-3.00913	-2.86927	4.74864	3.21091	0.00330799	0.0483571
Myo3b	-2.96748	-2.96748	-1.03482	-2.96748	-2.96748	-2.96748	-2.96748	-1.77312	4.35351	3.37773	0.0033109	0.0483571
Sgtb	0	2.51947	0	0	0	1.07458	0	3.21493	4.38128	3.37755	0.00331219	0.0483571
Otud7a	0.397388	2.0847	4.2537	2.17514	2.82431	2.19257	0.821344	-1.59143	5.14317	3.20981	0.00331668	0.0483661
Nom1	-2.76971	-2.76971	-2.76971	-2.76971	-2.76971	-2.76971	-1.44061	-2.76971	4.31795	3.43244	0.00331965	0.0483661
0610010F05Rik	-1.33827	-2.62813	0.0947126	-1.72609	1.22917	-3.56856	-2.21822	0.663976	4.84268	3.20916	0.00332183	0.0483661
Ppp1r26	1.24923	2.51602	4.28166	4.04261	3.19256	1.85066	1.3477	0	4.69495	3.23288	0.00332236	0.0483661
Wipf3	2.98368	3.07762	1.00721	0	0	0	2.87656	0	4.45389	3.33026	0.00332374	0.0483661
Dido1	-4.08425	-2.13174	-3.25067	0.363772	-0.866419	-0.916044	-3.89652	0.0456295	5.37285	3.1853	0.00334663	0.0486579
Tdp1	-1.23561	1.38794	-2.37906	2.15263	-2.37906	-1.39686	0.587937	1.18545	4.7288	3.22958	0.0033482	0.0486579
Rarb	0	3.62513	0	0	3.10979	2.15223	1.99652	1.76737	4.50546	3.2872	0.00336193	0.0488253
Pprc1	-1.02126	-3.88807	-3.83077	-0.375765	-0.48682	-4.07019	-2.53015	-3.82169	5.09189	3.18209	0.00337272	0.0489498
Tmem240	0	1.18741	0	3.66682	2.12781	1.96463	3.48974	1.32124	4.52793	3.25338	0.00337618	0.0489678
Il16	-1.15741	-0.219756	2.01131	-1.15741	-1.15741	-1.15741	-1.15741	1.55543	4.39518	3.31956	0.00340279	0.0493082
Oasl2	-2.86595	-1.91641	-0.703452	-2.86595	-2.86595	-2.86595	-2.86595	-2.86595	4.35186	3.36473	0.00340411	0.0493082
Celsr1	0	0.945743	3.47665	2.85106	1.64817	0	2.10125	0	4.45463	3.27974	0.00341894	0.04946
Ulk1	0.0986046	2.13798	-1.15097	2.44229	-1.15097	1.9888	0.194799	0.0357609	4.54173	3.2206	0.00341947	0.04946
Trpc1	1.00497	2.29785	3.72314	-0.407001	1.88433	3.35129	-0.105122	4.36306	5.34259	3.17618	0.0034213	0.04946
Tacc1	-0.590247	1.75346	1.65853	-2.95524	1.12886	-1.43524	0.745424	-1.75748	4.95533	3.19601	0.0034277	0.0495201
Mfsd11	3.79854	5.35624	1.80453	4.85153	4.36623	4.57808	3.6566	0	5.23114	3.21922	0.00343056	0.0495291
Gh	0.63812	0.776027	0.420968	0.56309	0.741612	0.3727	-0.0396176	0.397755	15.8414	3.17443	0.00343577	0.0495719
Gm32316	0	0	0	0	0	2.75388	0	0	4.30979	3.48354	0.00344642	0.0496933
Zeb2	0	1.69822	4.40598	1.83533	2.66969	1.2714	2.93078	2.56961	4.6336	3.21578	0.00345841	0.0498336
Gm46542	-1.15828	-1.15828	1.75576	-1.15828	1.45999	-1.15828	-1.15828	-1.15828	4.38112	3.55124	0.00346151	0.0498457
Ptpn18	0	0	0	0	2.86134	0	0	0	4.3178	3.48074	0.00346558	0.0498718
Tln2	-0.681552	0.143273	-2.03788	0.858319	-2.18147	-3.04566	-3.04566	1.20635	4.69786	3.21375	0.0034749	0.0499735
Rsad1	3.09512	0	0	3.32418	1.8886	1.30504	0	0	4.44926	3.30948	0.00347912	0.0500016
Rps6kb2	4.38593	1.23123	1.3275	1.286	1.35316	0.977736	1.34575	1.1867	4.52908	3.18879	0.00348717	0.0500848
Mak	0	0	0	1.45159	2.84066	0	1.35003	0	4.3409	3.35221	0.00349632	0.0501835
Adgrb1	-4.08209	0.620415	-0.347317	-1.12996	-1.64116	0.0213706	-3.34883	-4.13751	5.53763	3.16672	0.0035005	0.050211
Ralyl	1.71987	-2.25739	1.16577	1.48523	0.126262	-2.25739	1.47196	2.26311	4.87094	3.20787	0.00352314	0.050503
Pard3b	-1.15153	1.48833	1.45894	0.134689	0.496176	-1.15153	0.322219	3.26868	4.56983	3.20615	0.00353738	0.0506741
Ralgapa2	1.13991	0	2.09818	1.51053	2.40539	0	1.32259	4.04553	4.50492	3.22929	0.00356878	0.0510771
Mtmr10	-2.47141	-3.61442	-2.60557	-3.61442	-2.32073	-1.7941	-3.61442	-3.61442	4.41609	3.26055	0.00357013	0.0510771
Fgf11	1.26218	0	0	0	3.15679	0	0	0	4.34692	3.39314	0.00359981	0.0514685
Cdk14	3.41241	3.38985	0	0	0.862007	1.24293	1.346	1.45109	4.48403	3.22411	0.00361165	0.0515958
Gnptab	-2.7415	-1.76789	-2.30587	-2.04462	-3.01603	-3.87925	-3.87925	-2.55744	4.46675	3.19702	0.00361405	0.0515958
Pcdh18	-2.76974	-2.76974	-2.76974	-2.76974	-1.41898	-2.76974	-2.76974	-2.76974	4.31661	3.391	0.00361572	0.0515958
Usp53	2.24418	-0.38141	-1.08274	-0.922342	-0.746582	-2.08782	-0.533829	-2.08782	4.53568	3.19396	0.00364006	0.0519096
Mzt2	1.63464	0.3619	0.862178	-1.04954	-0.19296	-2.8011	0.998572	-2.8011	4.79679	3.19296	0.00364863	0.0519975
Hes6	1.29041	2.62124	1.72779	-1.16283	3.40063	3.41661	-1.16283	2.28447	4.89186	3.19269	0.00365093	0.0519975
Kdsr	-3.16774	-3.16774	-3.16774	-1.64813	-1.82067	-3.16774	-3.16774	-1.97414	4.3668	3.28654	0.00365922	0.052082
Lysmd2	2.97007	3.04679	2.95855	0.520988	2.81419	1.51376	-1.45585	3.26082	5.11966	3.16753	0.00366855	0.0521812
S100a16	1.28933	0.502049	-1.00544	-2.35093	-1.48872	-2.35093	-2.35093	-2.35093	4.48084	3.2459	0.00369011	0.0524507
Zc3h13	-0.174213	-1.3198	0.586313	-4.04721	1.97262	1.12769	-1.32524	-0.541273	5.39035	3.16478	0.00369271	0.0524507
Washc4	0.763821	1.43071	-0.94856	-0.507962	3.15985	1.20058	-1.96015	-0.397817	4.78516	3.16456	0.00369462	0.0524507
Heph	2.92024	0	0	0	0	0	0	0	4.31837	3.44773	0.00369928	0.0524832
Morn2	0	3.48351	3.49376	2.44499	4.81829	2.39128	1.54754	2.56694	4.77834	3.18673	0.00370237	0.0524934
Slc25a13	-0.254321	1.93563	-1.39706	-1.39706	-1.39706	0.114245	-1.39706	1.33772	4.43011	3.24366	0.0037088	0.0525508
Evpl	1.26319	0	3.00448	0	2.76223	0	0	3.08671	4.4528	3.2784	0.0037253	0.0527405
Papolg	-0.253436	-0.573134	0.0843557	-1.51709	-1.51709	-1.51709	2.24743	1.83244	4.50104	3.21044	0.0037272	0.0527405
Chdh	0	3.40005	0	2.70363	1.69146	0	1.32551	1.32245	4.44415	3.2411	0.00373025	0.0527405
Edem1	3.91646	1.45426	2.45091	1.28661	1.66856	0	0	0	4.46911	3.24092	0.00373173	0.0527405
Mpi	0.652763	-1.71232	2.10951	-0.196446	-1.71232	-1.71232	-1.71232	0.578824	4.48891	3.24034	0.00373669	0.0527768
Atad3a	0	3.2569	2.25238	0	2.2351	0	1.3234	3.4332	4.49686	3.2397	0.00374204	0.0528186
Plekha5	0.348055	-6.23478	0.395245	0.48575	-0.17885	-0.2017	-6.23478	1.40204	6.80002	3.18177	0.00374572	0.0528368
Fcgr3	0	0	2.71826	1.84232	0	0	0	0	4.32657	3.37281	0.00375411	0.0529215
Col4a5	-3.16855	-3.16855	-3.16855	-3.16855	-3.16855	-3.16855	-1.83979	-3.16855	4.34063	3.37181	0.00376187	0.0529971
Efl1	1.75964	0.663624	0.649145	0.975864	-1.15498	2.60435	3.33862	-1.15498	4.67614	3.17807	0.00377833	0.053195
Vill	0	0.940236	0	1.45136	2.84144	0	0	0	4.3354	3.31405	0.00379341	0.0533733
Eml5	1.40763	-1.48719	-2.0906	-4.34697	-0.428174	-1.51929	1.46961	0.395679	5.43855	3.15308	0.00379714	0.0533919
Alg3	-1.1969	-1.09078	-1.36505	-4.34138	-4.34138	-0.136573	-4.34138	-0.334122	4.84943	3.20039	0.00381451	0.0535843
Zdhhc6	0.418916	-2.79565	0.594	-2.79565	1.54313	-1.56534	-2.79565	0.666202	4.70646	3.19994	0.0038185	0.0535843
Bdh2	0	0	1.3204	0	3.12959	0.984035	0	0	4.35808	3.31074	0.00382036	0.0535843
Rps6ka5	1.1443	1.82952	0	0	2.97068	0	0	1.44834	4.36767	3.26694	0.00382053	0.0535843
Hs1bp3	0	2.5119	1.04524	4.02371	0.862659	2.05404	0	0	4.47432	3.22985	0.00382616	0.0536293
Pomgnt2	0.42957	1.61423	-3.74323	-3.74323	1.55906	0.894011	0.729652	1.51284	5.46791	3.17193	0.00383323	0.0536944
Lrp1b	3.4682	-1.39601	-0.0804281	3.00675	3.41826	0.584278	2.83389	2.67709	5.11257	3.14846	0.00383925	0.0537446
3300002I08Rik	-3.29582	-1.27265	-3.38651	-4.43882	-0.359141	0.597272	-2.93652	-0.752927	4.96674	3.14719	0.00385089	0.0538735
Fpgs	-3.82763	0.357571	-0.950689	-1.76384	0.170935	0.861659	-3.82763	-2.50272	4.89597	3.16917	0.00385814	0.0539227
Zfp994	-1.16155	-1.16155	1.62888	-1.16155	-1.16155	-1.16155	0.167469	-1.16155	4.32871	3.306	0.00385929	0.0539227
Nlrp4g	0	0	0	0	0	0	0	3.38072	4.34363	3.42601	0.0038619	0.053925
Atp11a	3.88204	3.08824	4.53862	4.47005	0	2.57948	3.09823	0	4.86974	3.19389	0.00387205	0.0540124
Dis3	1.24872	1.18144	2.38799	3.44078	1.73626	4.56805	3.71345	4.42928	4.8545	3.14479	0.00387304	0.0540124
Zfp260	2.36509	3.51209	1.04582	2.35187	0	0	0	1.97813	4.46183	3.22394	0.00387748	0.0540402
Gm14548	0	0	2.88894	0	0	0	1.5035	0	4.33275	3.35591	0.00388752	0.054146
Gm24105	-2.60229	-3.3343	-3.2768	-0.626795	-0.483954	0.713059	-0.135139	-2.39899	5.15037	3.12292	0.0038917	0.0541701
Adamtsl1	0	3.1049	2.87597	0	0	0	3.92228	2.21754	4.53494	3.25785	0.00389775	0.0541846
Hdac9	0.792807	2.05733	-2.84839	2.31744	0.438835	-2.84839	1.51004	0.513579	5.12066	3.16454	0.00390024	0.0541846
Dcdc2a	-1.46047	2.00754	1.31853	-1.46047	1.13513	-1.46047	-1.46047	-1.46047	4.45846	3.25743	0.00390133	0.0541846
Shroom3	0	3.39457	3.28285	0	2.12826	0	1.34586	2.09492	4.48903	3.22109	0.00390254	0.0541846
Bcl2l13	-1.58064	-1.58064	1.02084	-1.58064	-1.58064	-1.58064	1.97463	0.579378	4.44754	3.25382	0.00393249	0.0545349
Braf	-0.441993	1.63452	3.10728	2.82036	3.78226	0.20641	3.97086	2.95022	5.36161	3.11859	0.00393271	0.0545349
Xpa	2.44329	0.649558	-0.547943	1.49669	-2.09576	-0.245687	1.18225	-2.09576	4.72572	3.15961	0.00394566	0.0546491
Bbc3	1.14344	4.23495	4.17876	3.89481	1.35548	4.69032	4.87016	0	5.03323	3.15958	0.00394589	0.0546491
Plppr3	-2.70495	-2.18661	-2.30205	-2.33421	-3.84719	-3.84719	-3.84719	-2.65757	4.44862	3.18504	0.00395189	0.0546811
Zbtb18	-2.48129	-1.46155	-2.67769	0.853209	-1.2454	1.41312	-0.586176	-2.26555	4.95099	3.11641	0.0039535	0.0546811
Snx8	1.46864	-0.473696	-2.14189	1.64704	0.836044	-2.14189	-2.14189	-2.14189	4.58206	3.21487	0.00395768	0.0546811
Pcdh19	2.74285	0	2.41983	0	0.862823	0	1.34635	3.74011	4.47203	3.21483	0.0039581	0.0546811
Zfp105	0.546581	-2.38202	-2.38202	-2.38202	-2.38202	-2.38202	-0.910051	-2.38202	4.36939	3.29382	0.00396122	0.05469
Gm32313	3.26099	0.944839	0	1.28651	3.63611	0.978724	0	0	4.47265	3.21389	0.00396645	0.0547069
Lims1	1.2554	-2.16112	-3.80634	-1.01867	-0.714435	-1.48735	-3.3799	0.249844	5.41105	3.11468	0.00396999	0.0547069
Hsd3b7	4.08334	2.52469	2.94964	0	0	2.86562	1.50783	1.47014	4.58444	3.18305	0.00397005	0.0547069
Eya3	-1.39706	2.02186	2.28812	1.93344	2.81366	-0.416079	-1.39706	-0.206555	4.69145	3.15653	0.00397426	0.0547069
Col13a1	-0.0197083	1.70328	-1.16147	-1.16147	-1.16147	-1.16147	-1.16147	-1.16147	4.33385	3.29222	0.00397482	0.0547069
Zbtb1	-1.68738	-2.73107	-1.9633	-5.3381	-4.20982	-3.39233	-1.54281	-2.21836	4.92896	3.13281	0.00398526	0.0548166
Top3b	-3.52956	-3.73342	-0.210384	-3.22995	0.289108	0.800237	-0.440243	-2.79282	5.24868	3.11281	0.00398801	0.0548203
Ltbp1	0	4.1898	3.74223	2.19679	3.01471	3.21456	5.34101	2.38043	4.96066	3.15453	0.00399297	0.0548543
Gtf3c4	3.58616	2.70411	0	0	3.43021	0	1.32345	1.47059	4.52244	3.21022	0.00399947	0.0549067
Slk	1.12414	-1.71793	-1.71793	2.45915	0.59329	1.17499	-0.211652	2.25888	4.68754	3.15354	0.00400228	0.0549067
Igsf9b	0	3.62682	0	2.55991	3.10752	2.45795	3.87731	0	4.62408	3.20969	0.00400423	0.0549067
Adamtsl3	0	2.86488	0	0	1.12825	0	0	0	4.32671	3.34094	0.0040097	0.0549135
Dclre1a	0	2.86488	0	0	1.12825	0	0	0	4.32671	3.34094	0.0040097	0.0549135
Emsy	1.24165	1.90192	1.30558	-1.23331	0.137702	-4.8814	1.06788	-4.8814	6.12323	3.15245	0.00401255	0.0549186
Uxt	0	1.45468	1.8056	2.97045	3.09652	4.16762	2.10114	1.97809	4.62005	3.15164	0.00402017	0.0549888
Hp	0	0	3.03788	0	0	1.22824	0	1.32413	4.34894	3.28588	0.00402906	0.0550479
Btbd10	0.520826	2.74022	-0.519879	0.870715	0.872387	0.314352	1.49866	3.60424	4.87975	3.10853	0.00402948	0.0550479
Ttll11	-2.57616	-2.57616	-2.57616	-0.541434	-2.57616	0.77467	-0.329678	-2.57616	4.45659	3.24008	0.0040533	0.0553391
Mcoln1	-2.44656	-0.984331	-0.212787	0.520593	0.658834	-2.44656	-2.44656	-2.44656	4.4704	3.20358	0.00405984	0.0553727
Rnf121	0.591647	-2.70992	-3.89219	-1.09794	-2.04823	-1.90519	-2.54238	0.192274	4.79985	3.12494	0.00406076	0.0553727
Sbf2	0.27689	2.67872	3.2047	2.57988	0.529652	-0.0857041	-1.16141	3.14753	4.82808	3.12433	0.0040667	0.0554194
9430038I01Rik	2.92015	0	1.01284	0	0	0	0	0	4.32569	3.33269	0.00407871	0.0555488
Ripor2	-2.01065	-3.15135	-3.15135	-1.31831	-3.15135	0.4985	-1.80561	-0.435493	4.52266	3.17077	0.00408402	0.0555837
Fam163a	0	1.47633	1.33839	0	0	3.15007	0	0	4.36347	3.27908	0.00408818	0.0555837
Ube2o	-2.00467	-0.164733	-0.0884121	2.14253	0.596508	-2.00467	1.08335	2.40987	4.71897	3.14437	0.0040893	0.0555837
Uqcc1	2.69449	2.7608	-0.141084	3.90592	1.81397	3.14131	-1.45564	2.57771	5.15919	3.12155	0.00409374	0.0555837
Golga7b	-1.46113	0.982049	-1.46113	-0.295137	2.3219	2.00352	-1.46113	1.06055	4.57082	3.16973	0.00409384	0.0555837
Map7d1	-1.9832	1.24679	2.00049	1.55439	2.25355	2.49745	-3.13315	1.41517	5.50045	3.12116	0.00409748	0.055599
Tmem108	-0.0121695	-1.15444	2.5724	-1.15444	1.22341	-1.15444	-1.15444	0.414217	4.44805	3.19656	0.00412466	0.0558852
Cmtr2	0	0.938794	0	0	1.34229	0	1.32779	3.17481	4.3649	3.23202	0.00412596	0.0558852
Frem2	3.21492	0	0	0	0	0	1.50426	0	4.35614	3.32691	0.0041278	0.0558852
Bin3	0	0	1.01131	1.17274	1.29053	3.06548	0	0	4.36027	3.23154	0.00413031	0.0558852
Rif1	0.937978	1.23261	-1.64707	-0.837834	-0.15095	-1.90398	-1.47704	2.19391	4.92309	3.09822	0.00413122	0.0558852
Plekha7	-0.316707	2.86537	-0.446009	-0.168443	1.18442	1.54444	3.28456	0.738842	4.79734	3.09783	0.00413515	0.0559043
Zfp112	2.05682	2.62807	3.34681	0.351787	0.533328	2.20143	-1.15794	-1.15794	4.74428	3.13812	0.00414978	0.0559997
Fastkd5	0	2.85768	3.28433	0	1.34696	0	0	1.3227	4.42605	3.22937	0.00415014	0.0559997
Colec11	0	0.940383	1.0129	0	2.73179	0	0	0	4.31999	3.27195	0.00415111	0.0559997
Fign	2.09319	0	3.79289	0	0	0	1.97915	3.57072	4.52775	3.22913	0.00415235	0.0559997
Kctd18	0	0	2.7904	0	0	0	1.35024	1.19568	4.33022	3.27074	0.00416181	0.0560428
Gm39323	-1.19724	0.364475	0.761766	-2.34183	-0.406779	1.24754	2.51589	-0.261897	4.78045	3.11452	0.00416288	0.0560428
Crb1	3.88057	3.1841	0	0	2.82421	0	1.32394	3.29857	4.58438	3.19245	0.00416315	0.0560428
D6Wsu163e	-1.39704	-1.39704	-1.39704	-0.225659	-1.39704	-1.39704	1.92365	0.598381	4.3892	3.46253	0.00417492	0.056167
Atp7b	0	0	0	0	2.91018	2.31576	0	0	4.35779	3.319	0.00419591	0.0563412
Zfp286	1.73873	2.84094	0	2.95232	3.01286	0	0	0	4.45618	3.22437	0.00419611	0.0563412
Hbs1l	2.36508	0	2.69484	0	0	0	2.15157	3.1083	4.43935	3.22424	0.0041973	0.0563412
Tenm2	0.276105	-0.526894	-1.4604	0.372124	-1.4604	2.02475	-0.137774	2.2631	4.52939	3.13319	0.00419806	0.0563412
Irf3	-4.01521	-1.89778	-2.68797	-4.01521	-1.55518	-4.01521	-0.230447	-1.05772	4.62367	3.1582	0.00420407	0.0563677
Socs2	0.144295	-3.25005	-3.25005	-3.25005	1.37716	0.601143	1.93033	0.103674	4.99407	3.15806	0.00420541	0.0563677
Smim1	0	4.07691	4.47913	2.66557	0.871718	4.04391	2.08558	3.27821	4.82913	3.13221	0.00420769	0.0563677
Ppp2r5b	-2.71523	-0.79133	-4.05913	-2.60613	-2.81548	-1.06376	0.401889	-1.894	4.75216	3.10977	0.00421029	0.0563684
Zfp950	-3.25418	-1.50865	-3.25418	-3.25418	-2.00734	-0.0446252	-3.25418	-1.48414	4.46186	3.18645	0.00421994	0.0564634
Rbm48	-1.60544	-0.658256	1.81885	-1.60544	0.043207	-0.0209975	-1.60544	-1.60544	4.41482	3.18553	0.0042287	0.0565464
Dclk2	1.14227	1.27496	1.00763	1.16845	0.86487	3.77048	1.55137	0	4.44799	3.12903	0.00423921	0.0566504
Usp35	4.57809	6.0291	4.13373	1.767	5.91304	3.07956	4.14756	4.96005	5.58549	3.10667	0.0042416	0.0566504
Tex9	2.61823	2.72631	3.26565	2.43877	-1.50774	-0.271487	-1.50774	2.51206	4.97202	3.12774	0.00425211	0.0567548
Akt2	0.528767	0.12043	0.783693	1.71303	0.300698	-1.69617	-3.4816	2.98662	5.45925	3.10539	0.00425456	0.0567548
Pcgf6	-0.76367	-2.6011	0.324492	-1.43331	1.65684	-2.6011	-1.04915	0.857718	4.63672	3.12713	0.00425819	0.056769
Gm9442	2.65521	0	0	2.25079	0	2.36421	0	0	4.38403	3.25966	0.00426182	0.0567742
Wdr47	0.831461	-0.0530443	-0.0215431	1.56283	-3.89994	-1.44149	-3.63849	-0.885041	5.89584	3.08488	0.00426666	0.0567742
Gpr19	-2.87785	-5.02987	-0.5618	-3.52463	-1.90532	-1.3713	-3.67906	-3.47098	4.893	3.10415	0.00426713	0.0567742
Ccr2	-0.263544	-1.51264	-0.464378	-1.51264	-0.644998	1.91645	-1.51264	-1.51264	4.39705	3.18134	0.00426891	0.0567742
Slc37a4	1.47442	1.69242	-2.64891	-0.419199	-1.0652	1.28347	-3.96067	-0.634781	5.39605	3.10373	0.00427142	0.0567742
Amot	0.849738	2.77513	-0.145856	-1.15092	-1.15092	1.10517	0.810798	0.49383	4.52272	3.12546	0.00427494	0.0567868
Plekhb1	3.94589	2.53719	4.07896	0	3.47186	1.85086	0	1.3225	4.67693	3.14993	0.00428502	0.0568865
Zmym4	-1.14398	1.00284	0.0807491	1.58829	1.97464	2.04987	-2.39241	2.76919	5.06276	3.09889	0.00432096	0.0573293
Arhgap15	-1.60563	-0.420949	1.89673	-0.317715	-1.60563	-1.60563	-1.60563	-0.137497	4.41765	3.17525	0.00432801	0.057366
Usp54	-2.70085	-0.50487	-3.97856	-0.948967	0.00706431	-0.418064	-3.66431	-3.79501	5.18241	3.07889	0.00432892	0.057366
Usp6nl	-2.36961	-2.36961	0.906515	1.47399	-2.36961	0.0111376	-0.0944515	-1.04827	4.55949	3.14461	0.00433784	0.0573995
Klhl13	-1.28477	-0.605121	-3.24191	-2.80983	1.20162	0.0870739	-4.25841	0.267953	5.15325	3.0972	0.00433842	0.0573995
Cd44	1.26258	0	0	1.17143	2.6037	3.02849	0	0	4.388	3.20915	0.00433924	0.0573995
Zfp408	0	0	0	3.30977	1.29177	0.982973	1.32726	1.32347	4.38314	3.17163	0.00436357	0.0576868
Spata7	-2.37098	-2.37098	0.92121	-0.86056	-0.0298196	0.203431	1.79223	-2.37098	4.59815	3.1415	0.00436906	0.0577248
Gigyf1	-1.74475	-1.89206	1.10708	-3.73973	-0.719898	-1.43942	-4.29108	-2.99775	5.70321	3.07456	0.00437451	0.0577485
Zfp945	3.65424	2.98928	3.99669	1.52381	0.865268	0	3.67129	1.19002	4.6718	3.11533	0.00437776	0.0577485
Lrrc8b	-1.15832	-1.15832	0.784233	-1.15832	0.173865	1.99054	-1.15832	-1.15832	4.38022	3.2049	0.00438005	0.0577485
Plxna3	0	0	0	1.45282	3.10036	0.983355	1.34905	1.19329	4.37311	3.16963	0.00438329	0.0577485
Sft2d2	0	2.82986	2.1614	0	2.93031	0.981648	0	0	4.41174	3.20451	0.00438391	0.0577485
Uevld	0	0	0	2.66163	1.64916	2.74983	0	0	4.37248	3.24401	0.00440708	0.0580191
Tyms	2.59352	-1.59374	-0.27757	2.25582	0.0941861	2.30914	3.06838	3.09859	5.00763	3.09021	0.00441136	0.0580391
Ano6	-2.79716	-1.5275	0.236216	-0.959087	-2.79716	-2.79716	-2.79716	-2.79716	4.40554	3.20142	0.00441385	0.0580391
Rapgef1	2.14126	-0.293438	3.00034	3.72095	1.91521	4.01362	-0.641342	2.54285	5.6148	3.07038	0.00441893	0.0580714
Cyp2b13	0	0	3.14897	1.28596	1.92018	1.27332	3.7989	1.45133	4.50237	3.13542	0.00443078	0.0581924
Anapc10	4.40194	0.938457	3.64505	3.29189	0	1.94946	2.08502	3.86028	4.75875	3.10902	0.00444308	0.0583194
Tmem94	0.0315977	1.07946	0.525609	-4.37607	0.0790243	-4.4613	-1.42016	1.04318	6.32382	3.06671	0.00445838	0.0584855
Zfp212	0	3.25782	2.66904	0	1.64844	0	2.12999	0	4.43834	3.19646	0.00446239	0.0585033
Mtfr1l	1.94052	3.36034	1.25933	3.57383	4.41998	3.94237	0.588129	1.62937	5.51275	3.06593	0.00446676	0.0585101
Endog	4.23586	2.2621	2.80759	1.16789	1.24646	2.46244	3.30092	0	4.63962	3.10662	0.0044682	0.0585101
Fcer1g	0	1.69742	2.99905	0	0.870017	1.07509	0	0	4.35732	3.19485	0.00447821	0.0586065
Pde4dip	-4.07059	-0.548451	-1.61916	-1.60021	-1.28707	-4.07059	-4.07059	-1.7362	4.63591	3.13021	0.00448437	0.0586524
Gm48856	0	0	0	1.50535	2.10048	2.90121	0	1.87668	4.38936	3.19383	0.00448828	0.0586688
Rffl	4.62573	4.40295	1.80483	1.51501	3.12608	4.7521	1.33014	1.5579	4.93904	3.08219	0.00449658	0.05873
Cfap206	-1.95635	0.552334	1.502	-1.95635	1.21986	-1.95635	-1.95635	1.09409	4.53775	3.15781	0.00450187	0.05873
Tsen54	0.549099	-2.01111	1.4438	-1.66974	-1.71021	-1.68542	-1.44973	-2.95676	4.63585	3.08159	0.00450297	0.05873
Grik4	0.365095	-0.399892	-1.65383	-2.35973	-2.2667	-2.83434	-3.81472	-3.81472	4.66322	3.10326	0.00450359	0.05873
Pls3	3.42862	4.08278	1.84882	0	2.81694	4.07712	1.47272	0	4.70578	3.12809	0.00450634	0.0587312
Klhl42	1.14267	2.32915	0	0	0	0.980917	3.27811	2.75302	4.4341	3.15695	0.00451061	0.0587448
Rhobtb2	-2.13702	-1.93252	-2.61738	-1.6073	-3.96019	-3.96019	-0.27023	-0.340029	4.66341	3.1024	0.0045127	0.0587448
Gm34414	2.92015	0.950443	0	0	0	0	0	0	4.32567	3.28269	0.00452356	0.0588275
Nadsyn1	-1.57494	-1.57494	-1.57494	-1.57494	-1.57494	-0.49996	-1.57494	1.64087	4.3616	3.23176	0.00452438	0.0588275
Mif4gd	1.14072	3.17417	0	2.02497	2.91194	0	3.73416	1.18673	4.54263	3.12595	0.00452859	0.0588324
Nmnat3	0	1.2239	0	0	0	0	1.50418	3.06359	4.35351	3.23117	0.00453007	0.0588324
Uba1y	1.13896	2.32919	3.23461	0	0	2.7408	0	0	4.43314	3.18687	0.00455773	0.0591568
Tmcc1	-1.15538	2.65577	2.51921	1.86757	0.772391	-1.15538	0.192265	2.91523	4.69003	3.09756	0.00456426	0.0592068
Ighmbp2	4.0273	3.24413	0	2.93242	2.94582	1.93392	4.1525	0	4.73018	3.12182	0.00457195	0.0592473
Egfr	-1.15825	0.02525	-0.147841	0.013438	-1.15825	-1.15825	2.23152	-1.15825	4.38173	3.28684	0.00457775	0.0592473
Coro6	0	0	1.0128	0	2.73153	0	0	1.4474	4.32933	3.22615	0.00457915	0.0592473
Apbb1ip	0	0	2.71865	0	0	0	0	0	4.30608	3.33986	0.00458211	0.0592473
Phf14	1.55701	0.506079	2.92136	-4.81326	-0.888681	2.1141	1.59806	1.02504	6.68166	3.07411	0.00458397	0.0592473
Efna3	3.32196	4.20888	1.32825	1.92491	1.54613	1.6537	1.5078	0	4.58785	3.09571	0.00458414	0.0592473
Ctsc	0.113173	-1.71185	-1.71185	2.34519	0.856731	-1.71185	-0.203567	-0.390635	4.50182	3.12044	0.00458649	0.0592473
Rad52	0	3.33565	0	1.52711	1.3367	1.24292	0	3.56013	4.48371	3.14934	0.00458882	0.0592473
Mief1	3.93041	2.09644	3.47752	0	3.65255	3.04955	0	0	4.65896	3.14836	0.00459898	0.0593437
Usp25	3.56368	1.82432	2.68091	1.16822	4.43608	1.8512	1.34713	1.18945	4.65075	3.07174	0.00461001	0.0594514
Stn1	1.14093	1.81475	1.0448	0	3.91684	3.66608	1.48861	1.47035	4.56536	3.09288	0.00461468	0.0594769
Zscan12	0	0	1.99037	0	0	3.41586	0	0	4.37921	3.27209	0.00462405	0.0595607
Lmcd1	0	1.2647	0	0	0	0	0	3.01987	4.33972	3.29103	0.00462873	0.0595607
Gpx6	3.34625	0	1.6051	3.42126	3.26903	4.07435	2.22929	0	4.67655	3.11635	0.00462993	0.0595607
C5ar1	0	0	2.71848	0	0	0	0	1.19587	4.315	3.27104	0.00463418	0.0595607
Liph	-1.16163	-1.16163	-1.16163	-1.16163	-1.16163	1.66156	-1.16163	-1.16163	4.3232	3.27099	0.00463465	0.0595607
Wdfy4	0	0	0	0	2.47618	0	0	0	4.29466	3.33296	0.00464546	0.0596649
Bmf	-3.87007	-3.87007	-2.54184	-2.35949	-3.87007	-2.89159	-1.74004	-1.79138	4.47743	3.11437	0.00465113	0.059703
Cmss1	-0.414805	0.596652	-1.40549	-4.06358	-4.06358	-3.07751	-1.01389	-0.217418	4.87346	3.0884	0.00466345	0.0597741
Itch	-2.33448	1.77749	3.00346	-0.310955	2.57711	1.16702	-0.231489	1.1421	5.10014	3.0666	0.00466684	0.0597741
Fyn	3.76366	2.9173	4.00601	5.38756	4.96346	5.78202	4.64141	1.3273	5.45402	3.06657	0.00466713	0.0597741
Bend7	0	0.934078	1.00572	3.48965	3.26241	1.23213	2.09615	0	4.47937	3.1125	0.00467125	0.0597741
Exd1	1.1421	0	1.00736	0	0	3.15623	2.80744	2.88482	4.45183	3.14138	0.00467214	0.0597741
Acvr1	-0.565837	1.52144	1.58454	-0.715722	-0.268492	2.9467	-2.00532	0.889017	4.80128	3.06606	0.00467289	0.0597741
Togaram1	-3.19911	-1.08615	0.794949	-1.8471	-2.40189	-1.27705	-2.99435	0.41801	5.02227	3.04669	0.00467937	0.0598224
Iqck	-4.20304	-0.222849	-4.20304	-4.20304	-1.3613	-0.72925	-0.463321	-0.381367	4.83641	3.11122	0.0046851	0.0598609
Napepld	-0.366842	1.57306	-0.500108	-1.51125	-1.51125	-1.51125	-1.51125	-1.51125	4.36388	3.17333	0.00469595	0.059965
Relch	0	5.76361	4.13358	5.38766	3.03151	5.84732	5.34972	5.64764	5.75278	3.08445	0.00470689	0.0600699
Tex10	0.685157	0.947218	0.390634	-1.15185	3.06177	1.00158	-1.15185	2.08639	4.58419	3.08395	0.0047124	0.0601055
Cck	0	0.939587	0	0	2.64727	0	0	2.41245	4.34764	3.21179	0.00472231	0.0601972
Wdr59	1.1389	3.4712	0	0	1.33598	0	0	2.67409	4.43664	3.16868	0.00474439	0.0604438
Fras1	-0.345067	-1.78759	-2.72039	-2.72039	-2.72039	-1.41301	1.07869	-1.25073	4.50311	3.10529	0.0047496	0.0604754
Asphd2	1.49625	3.02286	0.794279	-0.293407	-0.121921	0.528888	-0.136087	-1.46063	4.61948	3.05816	0.00476171	0.0605631
Ninl	3.37443	0.945837	2.13732	0	4.10514	3.14343	0	3.08401	4.64448	3.10416	0.00476198	0.0605631
Naa25	0.988391	2.17321	-1.46138	0.862253	1.25087	-1.46138	-1.46138	-1.46138	4.50024	3.13214	0.00477069	0.060639
Tmem241	1.14023	1.46738	0	0	0.868479	1.07453	3.42718	0	4.38407	3.13024	0.00479119	0.060827
Srcin1	-0.942957	0.624972	-4.06472	-5.21579	-1.83808	-3.75533	-0.896202	-1.28361	6.08173	3.03688	0.00479167	0.060827
Gas8	0	2.8344	0	0	2.19893	0.984245	0	0	4.35404	3.20479	0.00479373	0.060827
Pcsk6	-1.23584	-0.399934	-3.94922	-3.94922	-1.6108	-2.7175	-1.71899	-3.94922	4.61359	3.10101	0.00479673	0.0608301
Runx2	0	0.948621	2.18503	3.14843	0	0	0	1.19317	4.37558	3.16298	0.00480437	0.0608628
Rad9b	-1.39706	-0.119869	-1.39706	0.576922	2.50703	0.588376	0.716479	2.45492	4.60745	3.07568	0.00480481	0.0608628
Tbc1d5	2.70069	0	3.8202	2.70515	3.59834	1.2724	0	1.47001	4.59868	3.09912	0.00481761	0.0609899
Tmc5	0	1.47068	0	0	0	0	0	2.69864	4.31616	3.25029	0.00483797	0.0612127
Hivep3	-0.302924	0.124862	0.181461	-1.79387	1.54499	-2.96658	0.912124	-2.96658	4.77544	3.07168	0.00485019	0.0613321
Gata6	1.77091	-1.15951	-1.15951	-1.15951	-1.15951	-1.15951	0.97043	-1.15951	4.36	3.27925	0.00486499	0.0614842
Ccdc38	-3.56981	-2.39089	-2.92047	-3.40478	-2.59287	-3.68422	-0.495511	-3.58854	4.78904	3.02993	0.00487289	0.0615488
Lgi2	0	1.18167	0	2.86252	0	0	0	0	4.32406	3.24572	0.00488405	0.0616545
Ascc2	0	0	3.02635	2.13547	0	0	1.3274	1.46697	4.37784	3.15433	0.00489698	0.0617825
Stau1	0.95292	-3.32577	0.486224	-3.32577	0.452157	2.12817	0.47733	2.04027	5.2679	3.06671	0.0049071	0.0618748
Washc1	2.95812	2.47533	3.37971	0.33538	0.485975	0.426485	0.37972	3.97415	4.97573	3.02618	0.00491728	0.0619469
Cdc42se2	-0.269911	-1.5322	-2.96847	-0.665435	-2.68105	0.865864	-2.66909	-2.6949	4.85569	3.02608	0.00491842	0.0619469
Xdh	-3.27708	-3.27708	-0.177106	-1.14835	-1.93883	-3.27708	-1.95234	-3.27708	4.45915	3.11799	0.00492565	0.0620026
N4bp2l2	3.32578	4.08991	3.73996	0.125162	1.55326	1.74101	0.919984	3.2437	5.15461	3.02486	0.00493298	0.0620595
Zfp346	0	2.33438	0	0	0	2.62507	1.50433	0	4.35813	3.19098	0.00493793	0.0620864
Cdc6	0	0	2.62505	0	0	0	0	0	4.3013	3.30116	0.00494916	0.0620864
Gm29050	0	0	2.62505	0	0	0	0	0	4.3013	3.30116	0.00494916	0.0620864
Tcp10a	0	0	2.62505	0	0	0	0	0	4.3013	3.30116	0.00494916	0.0620864
Tex33	0	0	2.62505	0	0	0	0	0	4.3013	3.30116	0.00494916	0.0620864
Hmgxb4	0	2.07216	1.00737	3.74224	2.13327	0	1.50683	0	4.45164	3.11544	0.00495415	0.0621138
Cdc42ep3	0	1.18732	3.25812	2.11554	0	1.24314	1.50817	3.3443	4.49063	3.08526	0.00497417	0.0623294
Hps5	2.59469	-0.213214	4.40873	3.10024	3.0262	3.53389	0.999236	0.296162	5.16066	3.02072	0.00498253	0.0623988
Myo18a	2.25439	2.39675	-0.419376	1.37249	1.48038	-0.332432	0.261144	-3.99522	7.07237	3.01946	0.0049978	0.0625546
Ralgapb	4.72646	4.8702	6.60272	4.7195	1.5632	4.50719	3.31843	5.552	5.70764	3.03685	0.00500986	0.0626701
Haus1	5.00958	3.2002	3.41054	0	4.66986	0	4.08541	3.35379	4.9975	3.08061	0.00502778	0.0628586
Cpne5	-2.50153	-2.81461	-3.75079	-3.75079	-2.40919	-3.75079	-2.2779	-1.75606	4.44049	3.07956	0.00503998	0.0629755
Npas1	-2.61515	-2.61515	-2.61515	-2.61515	-2.61515	-2.61515	-2.61515	-2.61515	4.29721	3.29122	0.00504819	0.0630238
Cradd	-2.4853	-0.430966	-3.74877	-2.5823	-3.74877	-0.0782326	-2.27515	-2.42716	4.59696	3.05452	0.00504954	0.0630238
Gnal	0	3.07511	0	1.51532	0	3.15452	0	3.00076	4.47956	3.13931	0.00506202	0.0631439
Mettl16	1.14652	2.85027	4.00722	4.94503	4.74933	3.15612	0	3.06964	4.95852	3.0525	0.00507349	0.0632512
Trim36	0	0	1.54938	0	0	1.07463	1.98416	3.21505	4.37829	3.13713	0.0050865	0.0633449
Mxi1	0.803579	3.82008	3.57672	1.56302	1.07016	2.37446	1.94382	-0.215861	5.54374	3.01216	0.00508674	0.0633449
Rasgef1b	-1.39706	1.47011	0.875869	-1.39706	2.43115	1.16564	-1.39706	-0.210353	4.53209	3.07505	0.0050926	0.0633822
Negr1	-1.39706	-1.39706	1.38249	1.98177	-1.39706	0.529494	-1.39706	-0.207449	4.44874	3.10278	0.00509803	0.063414
Morc4	3.25654	1.18428	0	0	0	2.31889	1.34824	0	4.40403	3.13391	0.00512279	0.0636862
Aspscr1	4.00965	0.943048	1.87442	0.873258	0.587372	1.31108	0.311252	1.90612	4.79657	3.00809	0.00513692	0.0637985
A730060N03Rik	0	0	2.71591	2.3287	0	1.58716	0	0	4.3577	3.17221	0.00514098	0.0637985
Ldlrap1	-1.95922	-0.0184557	1.12394	-1.95922	-0.614058	-1.95922	-1.95922	-1.95922	4.39163	3.13221	0.00514198	0.0637985
Oga	-1.12308	-0.914225	-2.58774	-4.198	-2.25933	0.310958	-4.198	-1.15387	4.80819	3.04668	0.00514337	0.0637985
Smim22	0.0987373	2.13316	0.669975	-1.15084	2.46841	-1.15084	-1.15084	0.170365	4.49907	3.06694	0.00518882	0.0643262
Gm39383	0	0	2.6219	0	0	0	2.76608	0	4.3567	3.21629	0.00519181	0.0643272
Mllt10	1.73833	0.304046	2.27192	-1.75665	1.77656	1.7483	-2.95823	-0.606041	7.64252	3.0023	0.00520933	0.0645081
Magi1	1.96666	0.527451	3.29297	0.948739	0.697031	-0.0250987	-4.63284	3.02134	6.78973	3.02012	0.00521372	0.0645263
Iftap	1.20548	-1.15957	1.63342	-1.15957	-1.15957	-1.15957	-1.15957	-1.15957	4.35918	3.16228	0.00525181	0.0649603
2900026A02Rik	0	2.69001	0	0	0	0.985569	0	0	4.31463	3.2105	0.00525466	0.0649603
Dnajc17	0.855704	-0.0485971	-2.33741	-2.33741	-1.47137	-2.33741	-2.33741	-0.887818	4.42646	3.08821	0.00526868	0.0650972
Zbed3	0	1.66082	0	3.06929	2.60229	0	1.32673	0	4.39852	3.12064	0.00527508	0.0651399
Srgap1	-1.15577	1.1739	-1.15577	0.351434	-1.15577	0.147877	2.26112	-1.15577	4.4233	3.08709	0.00528202	0.0651891
LOC118567725	0.274054	-0.516008	2.02811	-1.46086	-1.46086	0.828052	-1.46086	1.04531	4.47231	3.05862	0.00528931	0.0652217
Lrrc28	-2.79135	-1.60518	1.22231	0.228516	-2.79135	0.699878	-1.44461	-0.817279	4.62578	3.03466	0.00529056	0.0652217
Tmem237	2.0081	2.4985	1.47626	-1.15471	3.00285	0.631206	0.396469	-1.15471	4.66714	3.0329	0.00531238	0.0654347
Cibar2	-2.83774	-3.97674	-3.97674	-3.97674	-2.84865	-3.97674	-2.65091	-2.6541	4.43109	3.24982	0.0053167	0.0654347
Sec61a2	1.24835	4.77362	4.36967	3.46034	4.79966	4.35629	4.31048	0	5.14662	3.03255	0.00531672	0.0654347
Fam193b	-2.74684	-3.94369	-0.0593845	0.158016	-1.10169	0.0612538	-3.56557	-3.69693	5.21892	2.99336	0.0053231	0.0654768
Tns2	-3.23414	-2.28757	0.450743	-1.72188	0.415798	-1.51954	-3.23414	0.734631	4.68254	3.03133	0.00533207	0.0655507
Trappc8	4.24304	2.70903	4.40693	-1.24684	3.14381	4.34885	3.44545	2.61678	6.61821	2.99172	0.00534425	0.0656149
Bmerb1	2.00927	3.09424	0	0	3.21601	1.24251	0	1.97785	4.47257	3.08186	0.0053448	0.0656149
Nol4	-0.798218	1.96538	-0.640714	-1.62984	-2.80327	-1.02509	0.967147	0.763773	4.7951	3.00959	0.0053462	0.0656149
Plcl2	0	0.950026	2.9592	0	0	0	1.34998	0	4.3422	3.15336	0.00535337	0.0656289
Stk36	-1.66005	-2.8055	-2.8055	-2.8055	-2.8055	-1.72972	-2.8055	-2.8055	4.32515	3.1532	0.00535522	0.0656289
Gm35624	1.60008	1.17074	0.332232	-1.21858	1.21242	-3.4258	-1.35855	0.531747	5.70905	2.99067	0.00535785	0.0656289
Rps6kc1	-1.15606	1.52672	-1.15606	-1.15606	-1.15606	1.00255	2.08176	-1.15606	4.41716	3.11316	0.00536293	0.0656289
Ankrd34a	-4.13955	-2.06103	-3.13378	-0.512487	-4.13955	-3.06729	-2.81559	-1.99265	4.58533	3.02873	0.00536471	0.0656289
Slc35b3	0	0	0	0	2.70526	0	0	1.56042	4.33006	3.20028	0.00536742	0.0656289
Lrrc23	1.34287	0	0	0	0	1.29973	0	3.0635	4.35434	3.15208	0.00536813	0.0656289
Ttc7b	-2.8238	0.669293	0.866372	0.583202	2.1457	2.47519	0.068169	3.23411	6.24232	2.98957	0.00537204	0.0656404
Zfp638	2.73968	0.986983	4.29454	1.5806	-1.70768	2.34535	2.56082	2.95704	7.57187	2.98794	0.00539326	0.0658303
Itga3	3.52447	1.4705	0	1.74254	1.12799	3.14191	0	0	4.46721	3.07785	0.00539354	0.0658303
Ankrd28	0.317544	-1.58808	-1.56033	-4.45517	-1.09641	-4.45517	-0.918839	1.00842	5.12187	3.02585	0.00540103	0.065882
Sclt1	-3.46864	-3.46864	-2.13195	0.850066	0.00589787	-1.04296	-0.236427	0.676847	4.81537	3.02564	0.00540373	0.065882
Tmco6	-1.15976	-0.220603	-1.15976	-1.15976	-1.15976	-1.15976	1.90866	0.618034	4.35647	3.19681	0.00541023	0.0659249
Gli2	0	0.938627	0	0	2.90772	1.07481	2.24379	0	4.36917	3.10881	0.00541474	0.0659435
Slc39a13	0.431753	4.31361	3.6084	-1.39671	3.53405	2.4708	4.40753	3.27243	5.5517	3.00326	0.00542752	0.0660627
Mtmr1	2.22307	1.25819	3.83011	4.68082	4.64625	4.77798	2.10313	5.04216	5.17344	3.00266	0.00543526	0.0660676
Ttc21b	-2.71865	-1.05052	1.12118	-2.71865	-1.4704	-1.47537	-2.71865	-0.563453	4.49775	3.04673	0.00543645	0.0660676
Pycr1	-2.97018	0.375012	-2.39879	-2.78039	-1.03168	-1.2202	-4.23241	-2.60367	4.79277	3.00253	0.00543689	0.0660676
Acan	0	0.947667	1.46785	1.17061	0	0	3.41781	1.46768	4.40114	3.07375	0.00544376	0.0661148
Sort1	-2.00193	0.49334	1.07644	0.566124	-0.591135	-3.43689	-3.43689	1.00344	4.94416	3.02153	0.00545617	0.0662291
Prune1	-0.562849	-1.9074	-1.9074	1.34111	-0.231266	-1.9074	-1.9074	-0.715233	4.39564	3.07217	0.0054633	0.0662793
Ppp4r1	0	1.2714	2.19747	3.98088	3.65509	1.51095	2.11283	3.93797	4.68175	3.02014	0.00547391	0.0663628
Arih2	1.34432	1.80551	1.13699	-0.0184349	-2.57258	-0.541275	-3.45082	1.60458	5.2558	2.99951	0.0054762	0.0663628
Parp14	0	0	0	1.50234	0	0.985235	0	2.89544	4.3379	3.14189	0.00548701	0.0664575
Snx29	2.65875	3.76646	0	0	0.861343	1.30834	2.10082	1.76733	4.49603	3.04058	0.00551414	0.0667495
Fbxo46	-1.15215	-0.207402	1.51496	1.26573	2.45989	-1.15215	-1.15215	0.317855	4.47475	3.03999	0.00552168	0.0667739
Kdm4b	1.85692	-1.38712	-1.31513	1.73122	-2.32365	1.03296	-0.15498	-1.13295	4.70017	2.9959	0.00552359	0.0667739
Lcorl	0.269256	-2.26754	-1.01176	-3.63327	0.676535	-3.15096	-1.38662	-0.166013	5.38342	2.9779	0.00552567	0.0667739
Dgka	1.13749	3.1848	4.34374	1.28647	2.4901	1.7141	1.50768	0	4.60075	3.01581	0.00552989	0.0667739
Srsf12	0	0	0	2.2636	2.82008	1.65554	3.08269	0	4.4372	3.09917	0.00553126	0.0667739
Cep41	-2.9267	-1.50106	-4.83474	-0.885165	-1.99233	-4.83474	-1.02674	-2.69559	4.85217	3.01456	0.00554612	0.0669168
Mycl	1.42422	-1.15795	1.79081	0.0134831	-1.15795	-1.15795	-1.15795	-1.15795	4.38794	3.09755	0.00555104	0.0669395
Cep95	-1.15845	-1.15845	-1.15845	0.130365	0.133057	1.99294	-1.15845	0.0346216	4.37774	3.06459	0.00555765	0.0669827
Ap4m1	-2.18941	-2.18941	-0.843267	-1.02386	0.114229	1.61225	-0.210191	-2.18941	4.49182	3.03672	0.00556347	0.066993
Myo1c	0	3.65938	0	0	2.59183	1.27297	2.70562	1.47039	4.48674	3.06404	0.00556457	0.066993
Apba1	0.145429	-0.430948	-0.89787	-0.470768	0.446605	-5.26065	-3.90537	-1.04365	5.59477	2.99128	0.00558467	0.0671984
Galnt10	-0.048211	-0.46358	1.29253	2.67113	-0.269141	-1.39706	-0.0736275	-0.0758376	4.51315	2.98946	0.00560899	0.0674543
Ldlrad4	0.452294	2.60995	1.33706	-0.787417	2.6216	3.78342	1.29736	3.27995	5.40102	2.96886	0.00564763	0.0678523
Pigp	-4.9961	0.598893	0.249251	-1.54804	1.06399	-0.168675	-1.96114	0.0899841	5.73461	2.98653	0.00564822	0.0678523
Casd1	2.4561	1.17966	-0.329209	-0.32673	2.25084	-2.25841	1.62553	0.367467	4.92098	2.98477	0.00567202	0.0680582
Sh2d3c	0	1.22482	3.1705	1.5045	0.869181	0	0	0	4.37063	3.08773	0.00567288	0.0680582
Capn1	-1.15635	1.53074	-1.15635	1.99022	0.787334	-1.15635	-1.15635	-1.15635	4.41172	3.08741	0.00567681	0.0680582
Cep57	1.35416	0.762496	-3.53361	1.47602	-0.166878	-2.30815	0.931629	-2.20769	5.13368	2.98435	0.00567767	0.0680582
Rev1	-1.67054	-0.577209	-3.23265	-1.21837	-0.980322	-3.16778	-6.04586	-2.90182	6.59825	2.96587	0.00568861	0.0681298
Polr3c	0	3.18491	2.43791	3.14316	3.62937	0	3.37077	0	4.60279	3.0542	0.00568981	0.0681298
Csf1	-3.22862	-3.22862	0.641083	-3.22862	-0.514647	-0.308475	-0.84174	-3.22862	4.58252	3.05153	0.00572429	0.0685056
Arhgap17	-3.88784	-1.91814	-0.296094	0.135751	-1.90685	1.1293	-2.53703	-2.42303	4.8944	2.97958	0.00574257	0.0685836
Lrrfip2	-1.87089	-4.4374	-0.385971	-0.00824427	0.153115	-6.10741	-1.27304	-1.81403	5.96468	2.97947	0.00574405	0.0685836
1700012B09Rik	0	0	2.95604	0	3.45067	1.93797	2.15236	1.97288	4.49331	3.04975	0.0057474	0.0685836
Il1b	1.14551	0	2.71845	0	0	0	0	0	4.31629	3.16733	0.00574808	0.0685836
Usp19	-0.389596	0.459503	-0.410635	-3.76182	-5.20717	0.155638	-2.9349	-0.605502	5.55265	2.9791	0.00574918	0.0685836
Slc12a5	1.24938	0.935127	3.5985	0	0	1.07284	1.34683	2.93503	4.45835	3.02246	0.00574944	0.0685836
Hyal2	2.36508	3.82447	1.32618	3.20024	2.02664	3.93872	0	0	4.65904	3.02189	0.00575705	0.0685836
Kmt2b	-3.41029	-0.12713	0.951733	-1.90367	0.138865	-3.41029	-3.41029	-1.00036	4.71722	3.02187	0.00575738	0.0685836
Snx25	-3.53764	-3.53764	-0.113728	-3.53764	-1.61347	-2.55824	0.0430933	-0.264288	4.6254	3.02143	0.00576324	0.0685836
Cox18	0.111745	2.44879	1.3891	1.14878	-1.71366	-0.406596	-1.71366	-0.39203	4.60087	2.99813	0.00576412	0.0685836
Ppp1r3b	0	3.21535	0	3.06703	1.34947	1.24177	0	2.15903	4.45521	3.0484	0.00576495	0.0685836
Luc7l	-1.50867	-1.58932	1.09827	-2.77055	0.922026	1.73128	-0.800392	1.58056	4.87216	2.97654	0.0057844	0.0687255
Elp6	-1.50997	1.3259	-0.497495	-1.50997	-1.50997	-1.50997	-1.50997	-1.50997	4.34017	3.11724	0.00578562	0.0687255
Stk40	4.26068	1.84239	1.32101	2.02031	4.1789	3.52112	0	3.11343	4.7637	2.9965	0.0057862	0.0687255
Abcf2	-3.9325	-1.57843	-1.14731	-2.75598	-0.287002	-1.13447	0.48627	1.03277	4.9532	2.97567	0.00579642	0.06879
Ppp1r32	-1.15094	1.56922	2.28811	-1.15094	1.59723	2.1263	-1.15094	-1.15094	4.53242	3.04588	0.00579785	0.06879
Brwd3	1.24745	-1.51445	-1.51445	-1.51445	1.1415	-0.534008	1.49334	-1.51445	4.44577	3.04515	0.00580744	0.0688668
Stx2	0	2.99551	1.0117	0	1.12821	0	1.32822	0	4.35289	3.0765	0.00581539	0.0689154
Pdss1	1.92472	1.45266	0	0	1.9393	3.83079	2.68016	0	4.5015	3.04437	0.00581778	0.0689154
Uspl1	-1.15472	2.34818	1.25707	0.0139667	0.181895	-1.15472	0.318261	-1.15472	4.44529	3.0159	0.00583719	0.0691084
Vegfb	-2.24826	-0.384126	-2.24826	-2.24826	0.382047	0.316601	1.31186	1.88292	4.6328	3.01444	0.00585687	0.0693042
Zfhx2	-1.33212	1.9684	-2.77308	0.255899	-0.301629	0.104977	0.959935	-2.77308	4.77663	2.98973	0.00587894	0.0694578
Akip1	-1.51709	1.79871	1.63318	-1.51709	1.0967	0.635115	-1.51709	-1.51709	4.50092	3.03973	0.00587907	0.0694578
Nsun7	-0.259248	-1.39706	-0.0695968	2.69321	-0.269063	-1.39706	-1.39706	0.0535315	4.46514	3.01278	0.00587928	0.0694578
Ly6e	-0.156681	-1.22655	0.608306	-4.80101	1.06021	0.802825	-3.46559	-0.760066	5.60947	2.96877	0.00589247	0.0695764
Hmgxb3	1.73828	3.41547	2.21371	1.5097	2.66904	0	0	0	4.46431	3.03693	0.00591649	0.0698227
Pon3	0	0	0	1.1745	0	1.58865	0	2.69838	4.32759	3.10554	0.00593307	0.0699811
Fpgt	0	0	2.62128	0	0	2.58361	1.48601	0	4.36322	3.105	0.00593994	0.0700248
Dedd2	-1.15518	2.1767	0.168869	1.69789	-1.15518	-1.15518	0.317691	-1.15518	4.43829	3.03441	0.00595025	0.0701075
Hopx	0	2.12202	3.29022	0	1.24433	0	1.47237	0	4.39724	3.06589	0.0059533	0.0701075
Gng12	-3.23563	-0.478359	-1.06568	0.597694	0.332554	0.756611	-4.38026	-1.47486	5.23111	2.96144	0.00599621	0.0705752
Nat8	-1.51628	1.69603	-1.51628	-0.34988	-0.388312	0.411677	-1.51628	1.81919	4.4764	3.00366	0.00600434	0.0706333
Zfp7	1.14118	0	0	0	2.83917	0	1.48571	1.32409	4.35047	3.06126	0.00601462	0.0706724
Fam171b	-1.15314	2.0633	0.681392	0.0142034	-1.15314	-1.15314	1.97318	0.297363	4.46206	3.00261	0.00601894	0.0706724
Tmem143	3.25115	2.67757	2.98601	0	0	0	0	2.08223	4.47851	3.06093	0.00601901	0.0706724
Zscan29	0	0	1.54997	0	2.83148	2.2851	0	0	4.3683	3.09874	0.00602046	0.0706724
Mad2l2	1.22424	0.335639	-4.4038	-0.00349871	-1.3529	0.52285	-2.31558	1.94131	5.63748	2.95935	0.00602624	0.0706949
Mthfd2l	0	0	2.20398	0	0	0	0	2.67442	4.33718	3.18012	0.00602877	0.0706949
Plpbp	-2.67345	-1.2793	0.0122565	-4.57843	-1.49739	-0.389299	-3.22744	-3.38125	4.9162	2.95862	0.00603676	0.0707308
Slc8a2	-2.96383	-2.96383	-1.64045	-2.96383	-0.373266	-2.96383	-1.63675	-2.96383	4.38994	3.05927	0.00604114	0.0707308
Ano7	0	1.18158	0	0	2.6107	0	0	0	4.3143	3.14336	0.00604221	0.0707308
Ism1	1.13941	3.09883	0	2.48821	0	1.65617	1.47259	0	4.41187	3.02745	0.00604463	0.0707308
Map3k3	-2.84845	-0.843765	0.978191	1.61941	1.94052	1.60346	-0.750424	1.11816	5.0623	2.95751	0.00605262	0.0707498
A4galt	0	0	1.04985	2.93471	0	2.16347	0	0	4.35352	3.09626	0.00605265	0.0707498
Ttc37	-3.5319	-2.25587	-2.52495	-2.02269	-2.18211	-3.5319	-0.902752	-3.5319	4.45785	2.99938	0.00606391	0.0708439
Ccdc191	-1.5756	0.260223	-1.5756	-1.5756	1.36198	-1.5756	-0.248002	-1.5756	4.37078	3.0571	0.00607011	0.0708516
Tfdp2	1.94722	1.66261	-4.06369	-2.76566	2.64852	2.32066	-0.219666	1.4924	6.11608	2.95611	0.00607284	0.0708516
Enpp1	0	0	0	0	2.47595	0.985712	0	0	4.30226	3.14083	0.00607419	0.0708516
Tra2a	3.10708	5.56521	4.4066	5.03313	4.34574	0	4.48367	2.47257	5.28929	2.97466	0.00609053	0.0709734
Efcab2	2.60227	2.11378	1.94421	0	0	0	0	0	4.35659	3.09318	0.00609282	0.0709734
Myo5b	0.745504	1.15495	-0.414352	-1.95666	-1.95666	-1.95666	-1.95666	1.20134	4.48141	3.02384	0.00609426	0.0709734
Penk	-1.15153	0.30985	-0.146021	2.24504	1.65574	2.70195	0.337045	-1.15153	4.56972	2.9741	0.00609856	0.0709861
Ttll1	0.603555	0.309351	1.23095	0.953248	-1.39706	2.61113	-1.39706	-1.39706	4.54324	2.9962	0.0061086	0.0709999
Coq8b	1.19014	0.0419413	1.12118	-0.764328	-2.59828	-2.59828	-2.59828	-1.4107	4.58972	2.99606	0.00611054	0.0709999
Rabgef1	0.181262	-4.34779	-1.21419	-4.34779	0.894305	-0.249178	-0.749728	-1.63929	5.12405	2.97307	0.00611336	0.0709999
Limch1	2.9857	2.74318	1.13106	-0.198939	0.926489	1.1694	-0.839619	3.25656	5.74532	2.93586	0.00611611	0.0709999
Mast2	-2.20045	-2.06204	-1.96478	-3.72902	-4.03123	0.198104	-3.43584	-0.607089	5.016	2.93582	0.00611669	0.0709999
Ing1	0.0136374	3.33371	0.726693	0.295764	-0.599798	2.56785	1.34073	1.39052	4.88466	2.93558	0.0061202	0.0709999
Gal3st2c	0	3.03899	0	1.28716	0	3.1613	0	2.19972	4.45227	3.05324	0.00612223	0.0709999
Gtf2h4	0	2.84053	0	2.02474	3.03187	0	1.48799	2.45104	4.45996	3.02113	0.00613178	0.0710734
Ppm1b	-0.976773	-0.272054	2.0677	-1.05119	0.96206	0.13095	-2.80129	-1.60763	4.76872	2.95114	0.00614524	0.0711447
Slc6a5	-1.39701	-1.39701	1.47115	-1.39701	-1.39701	0.352007	-1.39701	-1.39701	4.35321	3.08913	0.00614617	0.0711447
Elac2	-1.5775	-1.5775	0.227808	1.13851	-1.5775	-1.5775	1.07509	-1.5775	4.39805	3.05137	0.00614759	0.0711447
Chfr	0	3.19081	0	1.28832	0	1.07416	2.1512	1.32315	4.39919	3.01961	0.00615286	0.0711684
Mta2	-1.0697	0.394877	-0.0398732	-1.23224	-1.96531	-2.27884	-3.51727	0.878805	4.79065	2.95011	0.0061604	0.0712116
Fmo9	0	0	1.3206	2.86187	0	0	1.3501	0	4.3392	3.08778	0.00616407	0.0712116
Nle1	0	2.54212	3.3177	1.28772	2.31156	0.981037	0	0	4.42982	3.01865	0.00616626	0.0712116
Lrmda	1.141	0.949369	0	2.99808	1.64938	0	0	0	4.35575	3.04956	0.00617224	0.0712435
Tbck	1.13814	3.69325	0	0	1.24658	1.23133	2.43118	1.18895	4.45696	2.98956	0.00620292	0.0715602
Mbtd1	-0.206097	-0.737177	-0.620459	-4.45001	-2.3955	-1.90956	1.9625	0.250338	6.20913	2.92809	0.00623183	0.0718318
Anapc13	0.43327	-0.287864	-2.09821	-1.01656	-0.330471	-0.167405	-2.41732	-5.55272	5.7541	2.94503	0.00623538	0.0718318
Ube3b	1.34888	0.634089	-1.90341	-0.61716	-1.90341	2.18462	-1.90341	-0.331461	4.57285	2.98724	0.00623621	0.0718318
Tsc22d2	0.347557	-1.15326	-2.91718	-3.96521	-1.04242	-2.04019	-3.96521	-1.01484	4.72494	2.96414	0.00624291	0.0718677
Snip1	-2.00497	0.9853	-2.00497	-0.833163	-1.13623	-2.00497	-2.00497	-0.556391	4.37896	3.01298	0.00624583	0.0718677
Serpinb1b	1.14066	2.69218	3.84115	0	1.84163	1.99367	1.47392	0	4.49903	2.98566	0.0062589	0.0719807
Sipa1	0	0.949188	3.07688	0	1.1282	1.07502	0	1.19397	4.36006	3.01136	0.00626881	0.0720202
Zfp335	-2.20721	-3.96652	-2.21564	-0.943946	-3.06506	-3.67659	-2.93085	-3.03776	4.76955	2.92564	0.00626886	0.0720202
Zfp711	3.29292	3.60275	2.78822	0	0.870313	4.26273	4.23143	1.44798	4.78794	2.96196	0.00627489	0.0720521
Zfp142	-3.04077	0.24396	-1.69502	-3.04077	-3.04077	-0.731363	-3.04077	0.796773	4.5664	3.00961	0.00629356	0.0722289
Fam219a	3.26727	2.68905	4.37976	2.62698	4.41833	0	1.47146	3.02734	4.81296	2.95928	0.00631453	0.0724208
Adcyap1r1	3.00389	4.57283	5.12959	1.6864	3.12557	3.2432	3.66657	0.269154	5.59833	2.92248	0.00631684	0.0724208
Rgmb	0.85838	2.4442	2.20544	-2.28992	1.05645	1.48962	-2.28992	2.38337	5.04645	2.95862	0.00632427	0.0724684
Sirpa	-0.497496	0.899713	1.60883	1.42659	3.00504	3.43487	3.24353	-1.42278	5.84349	2.92169	0.00632896	0.0724846
Pknox1	1.14066	0	1.04444	1.16538	1.12792	2.88728	3.86698	1.99368	4.49561	2.95799	0.00633361	0.0725003
Tor1aip1	1.13869	3.84848	3.42993	1.52388	3.02359	1.7492	3.77298	0	4.66937	2.9573	0.0063438	0.0725496
Asxl2	-1.44382	0.10592	-1.72674	-3.96346	-0.370553	-2.04852	-3.96346	-3.96346	4.7027	2.97978	0.00634448	0.0725496
Zfp651	1.82267	-1.16149	-1.16149	-1.16149	-1.16149	-1.16149	-1.16149	-1.16149	4.33246	3.17603	0.0063714	0.0727999
Tpp2	-1.34456	0.869512	1.6334	0.427399	1.09053	-2.10249	0.739076	2.52736	5.22516	2.91882	0.00637296	0.0727999
Tnks1bp1	0.744246	-0.422217	-0.838088	-4.24567	2.10962	-0.161891	-2.15821	-0.685694	5.43045	2.93514	0.006384	0.0728884
Apod	-1.58161	-1.58161	1.83169	-1.58161	0.0886523	-0.339792	1.29511	-1.58161	4.45621	3.00279	0.00639145	0.0729115
Ripk2	-2.84	0.380603	-0.422147	-2.84	-2.84	-1.25968	-2.84	0.493845	4.51107	3.00257	0.00639467	0.0729115
Rapgef2	-0.32801	1.64274	-1.83156	-0.935427	-2.34564	-1.74456	1.22713	0.255223	5.26467	2.91733	0.00639592	0.0729115
Rab3gap1	-3.82559	0.423701	0.330464	-0.179159	0.190801	-3.82559	1.03304	0.301967	5.10831	2.9532	0.00640526	0.0729704
Eps15	-1.01569	0.583542	-0.0448328	-2.98837	-2.47767	-1.9961	-4.1656	0.646747	5.00776	2.93358	0.00640769	0.0729704
Rab3ip	-0.21337	-2.46483	-1.84272	-4.30712	-3.43797	-0.390101	-1.91447	-2.98345	4.76178	2.93234	0.00642663	0.0731484
Zfp276	-2.1884	0.799906	1.92362	1.44769	-1.32393	-2.1884	-0.841332	0.696372	4.64675	2.95133	0.00643342	0.0731644
Wdcp	-1.96619	-1.36703	-3.11035	-1.93828	-3.11035	-3.11035	-3.11035	-1.91707	4.37315	2.99981	0.00643466	0.0731644
Dph7	0	0.950365	1.3189	0	0	0	0	2.89568	4.33447	3.06585	0.00646197	0.0734264
Sema4d	-0.300506	0.112833	-0.867855	-4.28524	-4.45395	-1.56678	-3.73288	-0.0686412	5.70934	2.91292	0.00646434	0.0734264
Ppp1r14c	3.74938	2.78439	1.57206	1.16585	0	0.978058	0	1.97311	4.48609	2.97141	0.0064681	0.0734314
Iigp1	0	2.544	3.15668	1.17068	0.867439	1.24003	0	0	4.39993	2.99666	0.00648075	0.0735372
Dglucy	1.06974	-1.15959	-1.15959	-1.15959	1.44712	-1.15959	0.312209	-1.15959	4.35881	3.02696	0.00648842	0.0735864
Ak4	-1.39706	-0.120932	1.77434	1.0191	2.42783	-1.39706	-0.0513156	-1.39706	4.5232	2.96956	0.00649583	0.0736327
Slc24a2	2.97635	3.98196	2.87433	3.4924	-2.05708	2.89166	0.227989	1.72069	5.6144	2.92727	0.00650476	0.0736688
Tatdn1	-1.09125	-1.77486	-2.63752	-6.25166	-1.56459	-0.53371	-1.61794	-3.56843	6.66258	2.91028	0.00650567	0.0736688
Zfp90	0	2.8441	3.05282	2.92734	0	1.30821	3.64009	0	4.54492	2.99421	0.00651669	0.0737558
Zfp414	-1.22823	-2.36889	-1.32445	-2.36889	0.266426	0.88185	-2.36889	0.780684	4.49516	2.96649	0.00654192	0.0740034
Slf1	-3.69537	-1.0966	-1.02953	-5.61798	-1.53943	-4.5391	-1.13309	-0.0498297	5.41294	2.92376	0.00655943	0.0741117
Adgrl1	-0.605777	-2.57885	-0.448839	-7.51718	0.641175	0.0495131	-1.08072	-2.46194	7.31027	2.92363	0.00656147	0.0741117
Thrb	-0.105598	-1.8019	0.539923	-1.50085	0.228431	1.44169	-1.05044	-6.06488	6.52548	2.92355	0.00656268	0.0741117
Nbr1	-2.03256	0.430275	0.837646	-1.00484	0.485707	0.0718287	-4.54912	0.990883	6.62211	2.90652	0.00656491	0.0741117
Lmln	-1.61264	2.12818	-1.61264	-1.61264	-0.484719	-0.339363	0.539722	1.58744	4.52141	2.96468	0.00656937	0.0741242
Ncapd3	-3.10694	-1.28649	0.139246	1.6945	-0.793273	-0.0331125	-1.60128	-3.10694	4.7212	2.94191	0.00657713	0.0741363
Gm32790	1.45068	2.66813	2.78864	4.0737	1.84477	1.2416	3.76347	0	4.64766	2.94191	0.00657715	0.0741363
Slc12a7	-2.70153	-3.96486	-2.05285	-2.79759	-0.86374	-2.65863	-2.64029	-0.112116	4.62086	2.92228	0.00658258	0.0741598
Ssh3	-4.08729	-4.08729	-1.63835	-4.08729	-1.91869	-3.10962	-4.08729	-2.00476	4.5003	2.98913	0.00659206	0.0742287
Pik3c2b	-2.76961	-2.76961	-2.76961	-2.76961	-1.8977	-2.76961	-2.76961	-1.44509	4.32346	3.23258	0.00659615	0.0742369
Cysltr1	1.93578	3.06253	2.92845	0	0	1.23036	0	0	4.42481	3.0192	0.00660075	0.0742509
Ddx59	-1.1555	2.33133	0.648597	0.0138507	0.0899148	-1.1555	0.170356	0.0350728	4.4299	2.94008	0.00660543	0.0742657
Usp2	1.92916	3.75763	0.111325	3.83249	2.14388	3.78849	-0.182039	4.06452	5.97267	2.90308	0.00661966	0.0743695
Immp2l	1.45321	1.82078	1.00501	0	1.74577	1.27332	4.17431	1.18663	4.50141	2.93905	0.00662138	0.0743695
Armc7	-1.15934	-1.15934	1.29377	0.0132732	-1.15934	-1.15934	1.55321	-1.15934	4.36259	3.01693	0.00663397	0.074473
Cep126	-3.24279	-1.41835	-0.355299	0.301137	-0.92256	1.80558	-1.77116	-1.77672	4.79565	2.91847	0.00664259	0.0744968
Gm13012	1.14436	0	0	0	2.31809	1.07489	0	2.9072	4.36573	3.01633	0.00664283	0.0744968
Pdlim2	-0.318404	2.02356	3.21098	1.57376	-1.45873	1.3619	-0.131389	1.75625	4.75196	2.91824	0.00664623	0.0744971
Synrg	-3.23904	-0.460133	-0.888904	-3.19628	-4.48751	-1.75916	-0.139668	0.398327	5.02717	2.91412	0.00671166	0.0751923
Wdtc1	2.31012	3.91746	0.809757	1.45827	1.64209	1.71544	1.70315	-1.39696	4.92333	2.91279	0.00673293	0.0753924
Stk3	2.21729	4.79003	3.08375	1.50791	3.17136	3.41277	1.5042	1.99592	4.7862	2.91246	0.00673821	0.0754134
Rbbp8	-2.15774	-1.08124	-1.12894	-2.88886	1.38168	-0.765959	-0.877754	-4.06546	4.95888	2.91214	0.0067435	0.0754235
Zfp825	1.43801	0	2.64042	0	0	0	0	0	4.32468	3.0905	0.00674594	0.0754235
Rabggta	1.67537	2.05303	-1.39704	0.0565247	2.07751	3.11578	0.586352	-1.39704	4.7319	2.93074	0.00675179	0.0754401
Abcd2	0	2.09916	1.00933	1.50634	0.867143	0	3.42618	0	4.40455	2.97839	0.00675425	0.0754401
Cntfr	3.81869	3.48466	4.74984	2.88389	2.60856	1.71568	0	3.11445	4.83199	2.93022	0.00676008	0.0754671
Creb3l4	0	0	1.01302	0	0	2.58692	0	0	4.30963	3.08823	0.00677795	0.0756076
Hmgcll1	1.67014	-0.206942	1.26701	-1.15098	-1.15098	-0.0790486	2.63254	0.0357582	4.49254	2.929	0.00677951	0.0756076
Sigirr	-1.21271	0.00738134	-0.882323	-4.05147	-4.05147	-4.05147	-1.90039	-0.586837	4.74078	2.94789	0.00682882	0.0760893
Cd83	0	1.47393	2.2793	0	1.24474	0.981822	0	3.37551	4.40751	2.97349	0.00682959	0.0760893
Eps8	-0.250663	0.937372	2.90512	-1.39696	3.25436	2.82566	2.52311	0.840193	4.92862	2.906	0.00684273	0.0761379
F13a1	0	2.54993	0	0	0	0	0	0	4.30118	3.13912	0.0068433	0.0761379
AU040320	-1.21301	1.54154	1.61966	-3.11801	0.2981	0.379859	-1.78814	-1.65335	4.90976	2.90591	0.00684428	0.0761379
Mtbp	1.14181	0.95043	0	0	0	2.75352	0	0	4.32714	3.0383	0.0068569	0.0762399
Pkhd1l1	1.13926	1.26474	0	0	2.82494	0	0	0	4.34141	3.03797	0.00686191	0.0762446
Vcpkmt	-1.60051	-1.60051	1.33372	-0.3112	-0.730402	-1.60051	-1.60051	-1.60051	4.35596	3.00151	0.00686423	0.0762446
Gm33583	0	1.82464	1.05017	0	0	0	2.97002	0	4.34671	3.03701	0.00687613	0.0763385
Fbxo38	-3.15762	0.276045	-0.492533	-1.15179	-0.87547	1.00866	-4.30142	-3.10203	5.09703	2.90332	0.00688648	0.0764151
Mios	1.80024	1.51953	-1.46079	-1.46079	2.46749	-0.481896	-1.46079	1.62647	4.60871	2.94337	0.00690045	0.0765316
Cwc15	1.69141	1.78221	0.903717	0.569227	-0.0646723	0.949709	-3.81814	0.52306	5.54377	2.90117	0.00692181	0.0766846
Zfp942	0	2.71694	1.01281	0	0	0	0	1.3245	4.32808	3.03381	0.00692361	0.0766846
Oser1	0	4.49488	1.45935	3.55956	3.31517	3.97374	2.98323	1.98087	4.82554	2.91991	0.00692562	0.0766846
Gm8956	0	0	2.82489	0	0	0	0	0	4.31514	3.30089	0.00692833	0.0766846
Elmod3	-2.0629	-1.11866	-1.05755	-2.0629	0.393823	1.86974	1.29827	-0.61173	4.56046	2.91952	0.00693191	0.0766846
St6galnac6	-3.48005	0.389367	-1.44981	-0.195042	-0.372836	-2.45143	0.465842	-3.29835	5.22966	2.88379	0.00693506	0.0766846
[truncated: 20,105 more rows]

## Sheet: BioDare Rhythicity
Experiment ID	20615
Experiment name	Hamster_pituitary
Job	5d208f13-d0eb-4b22-9633-31d536bfa997
Method	BD2 eJTK
Submitted	2021-12-01T11:30:01.446748995	Finished	2021-12-01T11:31:02.505800973
NULL_SIZE	100000
DW_END	0
PERIOD_MIN	18
DATA_SET_ID	20615_NO_DTR
PERIOD_MAX	35
DW_START	0
PRESET	BD2_CLASSIC
METHOD	BD2EJTK
DATA_SET_TYPE_NAME	no dtr
PARAMS_SUMMARY	no dtr min-max p(18.0-35.0)
DATA_SET_TYPE	NO_DTR
Individual Results
Data Id	Data Label		tau	emp p	emp p BH Corrected	Pattern Shape	Pattern Period	Pattern Peak	P. Trough	P. Circ. Peak	P. Circ. Trough	P. Width	P. Asym		JTK p from tau	JTK p BH Corrected	bf corrected JTK p	BH bf corrected p
3	1700003M07Rik		0.552052	1e-05	0.000598	SPIKE	32	8	24	6	18	8	0.5		1.89e-09	1.39e-07	5.69e-06	0.000417
141	Aph1c		0.562459	1e-05	0.000598	SPIKE	30	20	5	16	4	7.5	0.5		9.58e-10	1.15e-07	2.89e-06	0.000345
159	Arhgdib		0.622874	1e-05	0.000598	SPIKE	30	20	5	16	4	7.5	0.5		1.47e-11	6.68e-09	4.42e-08	2.01e-05
167	Arid3a		0.616104	1e-05	0.000598	SPIKE	30	20	5	16	4	7.5	0.5		2.39e-11	9.07e-09	7.21e-08	2.73e-05
282	Catspere2		0.679366	1e-05	0.000598	SPIKE	24	12	0	12	0	8	0.5		2.04e-13	1.55e-10	6.15e-10	4.66e-07
303	Ccdc77		0.629644	1e-05	0.000598	SPIKE	32	16	0	12	0	8	0.5		8.96e-12	5.09e-09	2.7e-08	1.53e-05
304	Ccdc85c		0.566702	1e-05	0.000598	SPIKE	18	4.5	13.5	6	18	3	0.5		7.24e-10	9.68e-08	2.18e-06	0.000292
339	Cep128		0.552052	1e-05	0.000598	SPIKE	30	20	5	16	4	7.5	0.5		1.89e-09	1.39e-07	5.69e-06	0.000417
354	Cep97		0.552052	1e-05	0.000598	SPIKE	18	0	9	0	12	3	0.5		1.89e-09	1.39e-07	5.69e-06	0.000417
380	Clca3a1		0.552052	1e-05	0.000598	SPIKE	30	20	5	16	4	7.5	0.5		1.89e-09	1.39e-07	5.69e-06	0.000417
411	Col6a4		0.552052	1e-05	0.000598	SPIKE	18	4.5	13.5	6	18	3	0.5		1.89e-09	1.39e-07	5.69e-06	0.000417
510	Dnah17		0.552052	1e-05	0.000598	SPIKE	18	4.5	13.5	6	18	3	0.5		1.89e-09	1.39e-07	5.69e-06	0.000417
607	Espn		0.55035	1e-05	0.000598	SPIKE	32	16	0	12	0	8	0.5		2.11e-09	1.5e-07	6.35e-06	0.000451
709	Gata3		0.554248	1e-05	0.000598	SPIKE	20	13.33	4.58	16	5.5	5	0.25		1.64e-09	1.39e-07	4.94e-06	0.000417
781	Gm8956		0.552052	1e-05	0.000598	SPIKE	30	20	5	16	4	7.5	0.5		1.89e-09	1.39e-07	5.69e-06	0.000417
822	Grm5		0.57067	1e-05	0.000598	SPIKE	30	20	5	16	4	7.5	0.5		5.56e-10	9.03e-08	1.68e-06	0.000272
874	Ibtk		0.549658	1e-05	0.000598	SPIKE	32	16	0	12	0	8	0.5		2.2e-09	1.52e-07	6.64e-06	0.000458
947	Kctd15		0.57067	1e-05	0.000598	SPIKE	32	16	0	12	0	8	0.5		5.56e-10	9.03e-08	1.68e-06	0.000272
958	Kif21b		0.544949	1e-05	0.000598	SPIKE	34	17	2.12	12	1.5	8.5	0.25		2.98e-09	1.94e-07	8.98e-06	0.000583
1002	Lmcd1		0.57067	1e-05	0.000598	SPIKE	32	8	24	6	18	8	0.5		5.56e-10	9.03e-08	1.68e-06	0.000272
1020	Lrfn3		0.58711	1e-05	0.000598	SPIKE	26	4.33	17.33	4	16	6.5	0.5		1.83e-10	4.62e-08	5.51e-07	0.000139
1024	Lrp12		0.602563	1e-05	0.000598	SPIKE	32	16	0	12	0	8	0.5		6.26e-11	1.78e-08	1.89e-07	5.36e-05
1133	Mir670hg		0.552052	1e-05	0.000598	SPIKE	18	0	9	0	12	3	0.5		1.89e-09	1.39e-07	5.69e-06	0.000417
1137	Mlh3		0.609333	1e-05	0.000598	SPIKE	32	16	0	12	0	8	0.5		3.88e-11	1.26e-08	1.17e-07	3.8e-05
1177	Mthfd2l		0.562459	1e-05	0.000598	SPIKE	32	8	24	6	18	8	0.5		9.58e-10	1.15e-07	2.89e-06	0.000345
1228	Nbn		0.534068	1e-05	0.000598	SPIKE	19	17.42	7.92	22	10	4.75	0.5		5.93e-09	3.65e-07	1.79e-05	0.00109833
1463	Ppfibp2		0.552052	1e-05	0.000598	SPIKE	24	12	0	12	0	8	0.5		1.89e-09	1.39e-07	5.69e-06	0.000417
1487	Prdm5		0.544949	1e-05	0.000598	SPIKE	35	0	15.31	0	10.5	8.75	0.75		2.98e-09	1.94e-07	8.98e-06	0.000583
1494	Prl		0.793875	1e-05	0.000598	ACOS	32	2.67	5.33	2	4	32	0.92		1.17e-17	2.67e-14	3.53e-14	8.03e-11
1510	Ptpn18		0.552052	1e-05	0.000598	SPIKE	34	28.33	11.33	20	8	5.67	0.5		1.89e-09	1.39e-07	5.69e-06	0.000417
1589	Rgs8		0.56718	1e-05	0.000598	SPIKE	28	0	14	0	12	7	0.5		7.02e-10	9.68e-08	2.11e-06	0.000292
1599	Rimklb		0.532459	1e-05	0.000598	SPIKE	18	13.5	4.5	18	6	3	0.5		6.56e-09	3.93e-07	1.98e-05	0.00118264
1828	Spi1		0.552052	1e-05	0.000598	SPIKE	30	20	5	16	4	7.5	0.5		1.89e-09	1.39e-07	5.69e-06	0.000417
1999	Topors		0.572785	1e-05	0.000598	SPIKE	18	13.5	5.62	18	7.5	4.5	0.25		4.83e-10	9.03e-08	1.46e-06	0.000272
2013	Trerf1		0.568131	1e-05	0.000598	SPIKE	18	4.5	13.5	6	18	3	0.5		6.59e-10	9.68e-08	1.98e-06	0.000292
2030	Trmt5		0.693732	1e-05	0.000598	SPIKE	30	20	5	16	4	7.5	0.5		6.5e-14	7.39e-11	1.96e-10	2.23e-07
2207	Zfp438		0.57067	1e-05	0.000598	SPIKE	35	32.08	14.58	22	10	5.83	0.5		5.56e-10	9.03e-08	1.68e-06	0.000272
2251	Zfp949		0.541749	1e-05	0.000598	SPIKE	30	10	23.12	8	18.5	7.5	0.75		3.66e-09	2.31e-07	1.1e-05	0.000695
753	Gm31305		0.52915	2e-05	0.00108237	SPIKE	20	18.33	7.08	22	8.5	5	0.75		8.06e-09	4.58e-07	2.43e-05	0.00138059
1335	Pbx2		0.52571	2e-05	0.00108237	SPIKE	34	28.33	11.33	20	8	5.67	0.5		9.98e-09	5.4e-07	3.01e-05	0.00162696
1353	Pde4a		0.52915	2e-05	0.00108237	SPIKE	29	26.58	12.08	22	10	4.83	0.5		8.06e-09	4.58e-07	2.43e-05	0.00138059
1971	Tmem161a		0.526576	2e-05	0.00108237	SPIKE	25	0	10.94	0	10.5	6.25	0.75		9.46e-09	5.24e-07	2.85e-05	0.00157976
330	Cdkn3		0.521387	3e-05	0.00145084	SPIKE	27	18	4.5	16	4	9	0.5		1.3e-08	6.33e-07	3.92e-05	0.00190589
536	Dtx2		0.521387	3e-05	0.00145084	SPIKE	20	5	13.75	6	16.5	5	0.75		1.3e-08	6.33e-07	3.92e-05	0.00190589
1564	Rbm20		0.521387	3e-05	0.00145084	SPIKE	20	11.67	1.67	14	2	6.67	0.5		1.3e-08	6.33e-07	3.92e-05	0.00190589
1617	Rnf183		0.521157	3e-05	0.00145084	SPIKE	18	4.5	13.5	6	18	3	0.5		1.32e-08	6.33e-07	3.98e-05	0.00190589
1906	Tbrg4		0.525015	3e-05	0.00145084	SPIKE	30	15	28.12	12	22.5	7.5	0.75		1.04e-08	5.51e-07	3.14e-05	0.00165869
171	Armh3		0.519469	4e-05	0.00178273	SPIKE	20	13.33	2.08	16	2.5	5	0.75		1.46e-08	6.52e-07	4.41e-05	0.0019651
301	Ccdc39		0.519469	4e-05	0.00178273	SPIKE	27	18	4.5	16	4	9	0.5		1.46e-08	6.52e-07	4.41e-05	0.0019651
1296	Oasl2		0.519469	4e-05	0.00178273	SPIKE	20	0	8.75	0	10.5	5	0.75		1.46e-08	6.52e-07	4.41e-05	0.0019651
1784	Slk		0.520962	4e-05	0.00178273	SPIKE	18	6	16.12	8	21.5	4.5	0.25		1.34e-08	6.33e-07	4.02e-05	0.00190589
129	Ap1s3		0.516837	5e-05	0.00218556	SPIKE	18	10.5	1.5	14	2	4.5	0.5		1.72e-08	7.51e-07	5.18e-05	0.00226223
275	Cars		0.504871	6e-05	0.0023115	SPIKE	18	10.5	1.5	14	2	4.5	0.5		3.52e-08	1.36e-06	0.000106	0.00409107
617	Exd2		0.505588	6e-05	0.0023115	SPIKE	34	25.5	10.62	18	7.5	8.5	0.25		3.38e-08	1.32e-06	0.000102	0.003988
775	Gm46542		0.515235	6e-05	0.0023115	SPIKE	30	20	5	16	4	7.5	0.5		1.89e-08	7.97e-07	5.7e-05	0.00240065
1103	Mecr		0.515235	6e-05	0.0023115	SPIKE	18	1.5	10.5	2	14	3	0.5		1.89e-08	7.97e-07	5.7e-05	0.00240065
1233	Nckap5l		0.513911	6e-05	0.0023115	SPIKE	19	15.83	7.52	20	9.5	4.75	0.25		2.05e-08	8.47e-07	6.18e-05	0.0025535
1879	Syt10		0.507443	6e-05	0.0023115	SPIKE	29	0	14.5	0	12	7.25	0.5		3.02e-08	1.21e-06	9.11e-05	0.00363327
1987	Tnfaip8		0.509229	6e-05	0.0023115	SPIKE	32	8	24	6	18	8	0.5		2.72e-08	1.1e-06	8.19e-05	0.00332373
59	Adck5		0.504103	7e-05	0.00244782	SPIKE	19	15.83	7.52	20	9.5	4.75	0.25		3.69e-08	1.37e-06	0.000111	0.00414164
201	Atp7b		0.503708	7e-05	0.00244782	SPIKE	34	28.33	11.33	20	8	8.5	0.5		3.78e-08	1.38e-06	0.000114	0.00417133
229	Bdh2		0.501848	7e-05	0.00244782	SPIKE	34	28.33	11.33	20	8	5.67	0.5		4.22e-08	1.5e-06	0.000127	0.004511
367	Champ1		0.504294	7e-05	0.00244782	SPIKE	32	24	6	18	4.5	8	0.75		3.65e-08	1.37e-06	0.00011	0.00414164
1741	Slc1a2		0.501848	7e-05	0.00244782	SPIKE	18	4.5	13.5	6	18	3	0.5		4.22e-08	1.5e-06	0.000127	0.004511
2223	Zfp62		0.501562	7e-05	0.00244782	SPIKE	28	16.33	2.33	14	2	9.33	0.5		4.29e-08	1.5e-06	0.000129	0.00451732
696	Fut8		0.499598	9e-05	0.00305325	ACOS	22	18.33	3.67	20	4	22	0.67		4.81e-08	1.66e-06	0.000145	0.0049948
1012	LOC118567725		0.496537	9e-05	0.00305325	SPIKE	19	1.58	11.08	2	14	3.17	0.5		5.76e-08	1.95e-06	0.000174	0.00588785
299	Ccdc33		0.494468	0.00014	0.00467966	SPIKE	32	16	0	12	0	8	0.5		6.5e-08	2.17e-06	0.000196	0.00654584
784	Gm9442		0.492447	0.00015	0.00494126	SPIKE	20	11.67	1.67	14	2	6.67	0.5		7.31e-08	2.41e-06	0.00022	0.00725531
1788	Smc2		0.490668	0.00016	0.00505106	SPIKE	18	1.5	11.62	2	15.5	4.5	0.25		8.1e-08	2.57e-06	0.000244	0.00775201
1811	Sorcs2		0.49057	0.00016	0.00505106	SPIKE	35	17.5	2.19	12	1.5	8.75	0.25		8.15e-08	2.57e-06	0.000246	0.00775201
2162	Zbtb7b		0.491078	0.00016	0.00505106	SPIKE	24	12	0	12	0	8	0.5		7.91e-08	2.57e-06	0.000238	0.00774242
252	C87436		0.488504	0.00019	0.00583602	SPIKE	27	18	4.5	16	4	9	0.5		9.18e-08	2.86e-06	0.000277	0.00861363
531	Dpysl5		0.487467	0.00019	0.00583602	SPIKE	28	7	19.25	6	16.5	7	0.75		9.75e-08	2.98e-06	0.000294	0.00897567
1446	Polk		0.487088	0.0002	0.00598152	SPIKE	32	8	24	6	18	8	0.5		9.96e-08	2.98e-06	0.0003	0.00897567
1735	Slc12a9		0.487088	0.0002	0.00598152	SPIKE	34	31.17	14.17	22	10	5.67	0.5		9.96e-08	2.98e-06	0.0003	0.00897567
150	Arhgap12		0.484077	0.00022	0.00641096	SPIKE	29	12.08	26.58	10	22	9.67	0.5		1.18e-07	3.49e-06	0.000357	0.0105266
310	Ccnj		0.483611	0.00022	0.00641096	SPIKE	18	1.5	11.62	2	15.5	4.5	0.25		1.22e-07	3.54e-06	0.000366	0.010672
1129	Mief1		0.482647	0.00023	0.00661753	SPIKE	35	26.25	10.94	18	7.5	8.75	0.25		1.28e-07	3.69e-06	0.000387	0.0111321
158	Arhgap9		0.479708	0.00024	0.00665262	SPIKE	30	20	5	16	4	7.5	0.5		1.52e-07	4.21e-06	0.000457	0.0126724
1205	Myo9b		0.479708	0.00024	0.00665262	SPIKE	18	4.5	13.5	6	18	3	0.5		1.52e-07	4.21e-06	0.000457	0.0126724
2109	Vat1l		0.479708	0.00024	0.00665262	SPIKE	32	16	0	12	0	8	0.5		1.52e-07	4.21e-06	0.000457	0.0126724
1287	Nudt17		0.477652	0.00026	0.00712017	SPIKE	29	12.08	24.77	10	20.5	7.25	0.75		1.7e-07	4.67e-06	0.000513	0.0140623
184	Asph		0.475621	0.00028	0.00757659	SPIKE	35	32.08	12.4	22	8.5	8.75	0.75		1.91e-07	5.17e-06	0.000576	0.0155775
28	Abhd10		0.473453	0.00032	0.00836038	SPIKE	30	20	3.12	16	2.5	7.5	0.75		2.16e-07	5.64e-06	0.00065	0.0169843
245	Brpf3		0.474162	0.00032	0.00836038	SPIKE	32	24	10	18	7.5	8	0.25		2.07e-07	5.54e-06	0.000625	0.016707
466	D6Wsu163e		0.473845	0.00032	0.00836038	SPIKE	29	4.83	21.15	4	17.5	7.25	0.25		2.11e-07	5.58e-06	0.000636	0.0168086
675	Fn1		0.472328	0.00038	0.00970485	SPIKE	19	14.25	4.75	18	6	3.17	0.5		2.3e-07	5.87e-06	0.000692	0.0176793
681	Foxn2		0.472328	0.00038	0.00970485	SPIKE	30	10	23.12	8	18.5	7.5	0.75		2.3e-07	5.87e-06	0.000692	0.0176793
776	Gm48856		0.469342	0.00044	0.0111123	SPIKE	21	10.5	19.69	12	22.5	5.25	0.75		2.71e-07	6.85e-06	0.000817	0.0206433
149	Arhgap10		0.466837	0.00052	0.012312	SPIKE	34	28.33	11.33	20	8	8.5	0.5		3.12e-07	7.53e-06	0.000939	0.0226767
451	Cwc15		0.467027	0.0005	0.012312	ACOS	28	14	2.33	12	2	28	0.42		3.08e-07	7.53e-06	0.000929	0.0226767
602	Ercc2		0.466667	0.00052	0.012312	SPIKE	28	21	8.75	18	7.5	7	0.25		3.15e-07	7.53e-06	0.000948	0.0226767
1011	LOC118567721		0.466667	0.00052	0.012312	SPIKE	20	8.33	17.08	10	20.5	5	0.75		3.15e-07	7.53e-06	0.000948	0.0226767
1062	Macrod2		0.466667	0.00052	0.012312	SPIKE	27	18	4.5	16	4	9	0.5		3.15e-07	7.53e-06	0.000948	0.0226767
1984	Tmem69		0.466322	0.00052	0.012312	SPIKE	32	16	0	12	0	10.67	0.5		3.21e-07	7.59e-06	0.000966	0.0228718
315	Cd59b		0.463119	0.00063	0.0126908	SPIKE	34	14.17	33.29	10	23.5	8.5	0.25		3.82e-07	7.83e-06	0.00115196	0.0236007
331	Cdo1		0.461685	0.00067	0.0126908	SPIKE	26	23.83	10.83	22	10	6.5	0.5		4.14e-07	7.83e-06	0.00124597	0.0236007
533	Dtna		0.463816	0.0006	0.0126908	SPIKE	18	4.5	12.38	6	16.5	4.5	0.75		3.68e-07	7.83e-06	0.00110877	0.0236007
605	Erich2		0.461685	0.00067	0.0126908	SPIKE	19	15.83	7.52	20	9.5	4.75	0.25		4.14e-07	7.83e-06	0.00124597	0.0236007
804	Gpsm1		0.461685	0.00067	0.0126908	SPIKE	25	0	10.94	0	10.5	6.25	0.75		4.14e-07	7.83e-06	0.00124597	0.0236007
827	Gtf2ird2		0.461685	0.00067	0.0126908	SPIKE	27	2.25	14.06	2	12.5	6.75	0.75		4.14e-07	7.83e-06	0.00124597	0.0236007
941	Kcnip1		0.461685	0.00067	0.0126908	SPIKE	23	7.67	19.17	8	20	3.83	0.5		4.14e-07	7.83e-06	0.00124597	0.0236007
1031	Lrrc38		0.464644	0.00058	0.0126908	SPIKE	32	16	2	12	1.5	8	0.25		3.52e-07	7.83e-06	0.00105945	0.0236007
1098	Mcur1		0.46515	0.00057	0.0126908	SPIKE	29	7.25	21.75	6	18	9.67	0.5		3.42e-07	7.83e-06	0.00103039	0.0236007
1149	Mon1a		0.465168	0.00057	0.0126908	SPIKE	18	10.5	1.5	14	2	4.5	0.5		3.42e-07	7.83e-06	0.00102937	0.0236007
1266	Nom1		0.461685	0.00067	0.0126908	SPIKE	35	0	19.69	0	13.5	8.75	0.25		4.14e-07	7.83e-06	0.00124597	0.0236007
1338	Pcdh18		0.461685	0.00067	0.0126908	SPIKE	30	0	13.12	0	10.5	7.5	0.75		4.14e-07	7.83e-06	0.00124597	0.0236007
1391	Pigz		0.461685	0.00067	0.0126908	SPIKE	23	7.67	19.17	8	20	3.83	0.5		4.14e-07	7.83e-06	0.00124597	0.0236007
1524	Pxdc1		0.461685	0.00067	0.0126908	SPIKE	35	32.08	16.77	22	11.5	8.75	0.25		4.14e-07	7.83e-06	0.00124597	0.0236007
1609	Rmnd1		0.464948	0.00057	0.0126908	SPIKE	34	31.17	14.17	22	10	5.67	0.5		3.46e-07	7.83e-06	0.00104191	0.0236007
1671	Scml4		0.461685	0.00067	0.0126908	SPIKE	21	0	9.19	0	10.5	5.25	0.75		4.14e-07	7.83e-06	0.00124597	0.0236007
1700	Setd6		0.461685	0.00067	0.0126908	SPIKE	30	2.5	17.5	2	14	5	0.5		4.14e-07	7.83e-06	0.00124597	0.0236007
1711	Sgk1		0.464383	0.00058	0.0126908	SPIKE	20	10	18.75	12	22.5	5	0.75		3.57e-07	7.83e-06	0.00107478	0.0236007
1738	Slc16a3		0.464644	0.00058	0.0126908	SPIKE	30	20	6.88	16	5.5	7.5	0.25		3.52e-07	7.83e-06	0.00105945	0.0236007
1914	Tdpoz1		0.461685	0.00067	0.0126908	SPIKE	23	3.83	15.33	4	16	3.83	0.5		4.14e-07	7.83e-06	0.00124597	0.0236007
1915	Tdpoz9		0.461685	0.00067	0.0126908	SPIKE	23	3.83	15.33	4	16	3.83	0.5		4.14e-07	7.83e-06	0.00124597	0.0236007
2024	Trmt1		0.461935	0.00063	0.0126908	SPIKE	24	14	0.5	14	0.5	6	0.75		4.08e-07	7.83e-06	0.00122906	0.0236007
2082	Unc13d		0.461685	0.00067	0.0126908	SPIKE	30	20	6.88	16	5.5	7.5	0.25		4.14e-07	7.83e-06	0.00124597	0.0236007
2106	Uxt		0.46436	0.00058	0.0126908	SPIKE	35	32.08	12.4	22	8.5	8.75	0.75		3.57e-07	7.83e-06	0.00107613	0.0236007
425	Cpne7		0.461157	0.00069	0.0129616	SPIKE	27	18	4.5	16	4	9	0.5		4.26e-07	8e-06	0.00128241	0.0240903
986	Ldlrap1		0.458739	0.00072	0.0132742	SPIKE	21	19.25	8.75	22	10	7	0.5		4.86e-07	8.97e-06	0.00146288	0.0270336
1840	Srsf12		0.45883	0.00072	0.0132742	SPIKE	22	5.5	15.12	6	16.5	5.5	0.75		4.83e-07	8.97e-06	0.0014556	0.0270336
2052	Tti2		0.457455	0.00073	0.0132742	SPIKE	34	19.83	2.83	14	2	8.5	0.5		5.21e-07	9.47e-06	0.00156839	0.0285196
2080	Unc119		0.457488	0.00073	0.0132742	SPIKE	28	0	14	0	12	7	0.5		5.2e-07	9.47e-06	0.00156555	0.0285196
2087	Uros		0.456971	0.00078	0.01396	SPIKE	18	13.5	5.62	18	7.5	4.5	0.25		5.34e-07	9.56e-06	0.00161	0.0288151
2149	Xylt2		0.457	0.00078	0.01396	SPIKE	24	12	0	12	0	8	0.5		5.34e-07	9.56e-06	0.00160747	0.0288151
335	Cenpc1		0.455511	0.00085	0.014977	SPIKE	19	0	9.5	0	12	6.33	0.5		5.78e-07	1.02e-05	0.00174215	0.030697
1095	Mcoln1		0.455601	0.00085	0.014977	ACOS	28	25.67	7	22	6	28	0.67		5.75e-07	1.02e-05	0.0017337	0.030697
213	B2m		0.454003	0.00091	0.015552	NSPIKE	20	16.25	5	19.5	6	15	0.75		6.27e-07	1.08e-05	0.00188956	0.0324158
263	Camk2d		0.454551	0.0009	0.015552	SPIKE	18	10.5	1.5	14	2	4.5	0.5		6.09e-07	1.06e-05	0.00183472	0.0318346
554	Efcab2		0.453888	0.00091	0.015552	SPIKE	32	16	0	12	0	10.67	0.5		6.31e-07	1.08e-05	0.00190137	0.0324158
568	Elac2		0.454982	0.0009	0.015552	SPIKE	20	3.33	12.08	4	14.5	5	0.75		5.95e-07	1.04e-05	0.00179258	0.0313425
1701	Sez6		0.453794	0.00092	0.0156055	SPIKE	23	9.58	22.52	10	23.5	5.75	0.25		6.34e-07	1.08e-05	0.00191101	0.0324158
94	Alg9		0.450849	0.00098	0.0161414	SPIKE	18	16.5	7.5	22	10	6	0.5		7.43e-07	1.22e-05	0.00223779	0.0368587
223	Bckdhb		0.451068	0.00098	0.0161414	SPIKE	20	10	18.75	12	22.5	5	0.75		7.34e-07	1.22e-05	0.00221174	0.0366955
1218	Napb		0.452381	0.00096	0.0161414	SPIKE	30	15	28.12	12	22.5	7.5	0.75		6.84e-07	1.15e-05	0.00206158	0.034711
2019	Trim5		0.451829	0.00097	0.0161414	SPIKE	19	0	8.31	0	10.5	4.75	0.75		7.05e-07	1.18e-05	0.00212346	0.0354899
651	Fcgr3		0.449359	0.00102999	0.0162581	SPIKE	28	21	8.75	18	7.5	7	0.25		8.04e-07	1.27e-05	0.00242301	0.0382465
698	Fyb		0.449359	0.00102999	0.0162581	SPIKE	28	21	8.75	18	7.5	7	0.25		8.04e-07	1.27e-05	0.00242301	0.0382465
818	Grin1		0.449678	0.00102999	0.0162581	SPIKE	27	18	4.5	16	4	9	0.5		7.91e-07	1.27e-05	0.00238215	0.0382465
1079	Mapk12		0.449359	0.00102999	0.0162581	SPIKE	20	8.33	17.08	10	20.5	5	0.75		8.04e-07	1.27e-05	0.00242301	0.0382465
1737	Slc16a12		0.45023	0.001	0.0162581	SPIKE	35	32.08	14.58	22	10	5.83	0.5		7.68e-07	1.26e-05	0.00231302	0.0378238
1755	Slc35b3		0.449359	0.00102999	0.0162581	SPIKE	20	8.33	17.08	10	20.5	5	0.75		8.04e-07	1.27e-05	0.00242301	0.0382465
1662	Samd4		0.448445	0.00104999	0.0164595	SPIKE	20	15	5	18	6	6.67	0.5		8.44e-07	1.32e-05	0.0025438	0.0398763
78	Agtr1a		0.447619	0.00108999	0.0166278	SPIKE	28	0	14	0	12	7	0.5		8.82e-07	1.35e-05	0.00265786	0.0405956
824	Grpel2		0.447928	0.00107999	0.0166278	SPIKE	19	11.08	0.4	14	0.5	4.75	0.75		8.68e-07	1.34e-05	0.00261456	0.0404819
1092	Mboat7		0.447596	0.00108999	0.0166278	SPIKE	35	14.58	32.08	10	22	11.67	0.5		8.83e-07	1.35e-05	0.00266113	0.0405956
1942	Thoc6		0.447903	0.00107999	0.0166278	SPIKE	35	5.83	23.33	4	16	8.75	0.5		8.69e-07	1.34e-05	0.00261805	0.0404819
1585	Rgs11		0.446242	0.00111999	0.0167483	SPIKE	34	17	2.12	12	1.5	8.5	0.25		9.49e-07	1.42e-05	0.00285908	0.0427546
1648	Rttn		0.446242	0.00111999	0.0167483	SPIKE	26	4.33	17.33	4	16	4.33	0.5		9.49e-07	1.42e-05	0.00285908	0.0427546
1804	Snx11		0.446308	0.00111999	0.0167483	SPIKE	27	18	4.5	16	4	9	0.5		9.46e-07	1.42e-05	0.00284918	0.0427546
1240	Nectin3		0.44552	0.00121999	0.0181244	SPIKE	18	12	1.88	16	2.5	4.5	0.75		9.86e-07	1.46e-05	0.00297047	0.0441299
211	Avl9		0.444393	0.00127999	0.0188923	SPIKE	20	5	16.25	6	19.5	5	0.25		1.05e-06	1.54e-05	0.00315253	0.0465305
596	Epha7		0.443664	0.00134999	0.01967	SPIKE	24	10	22	10	22	8	0.5		1.09e-06	1.59e-05	0.00327596	0.0480404
1207	Myt1		0.443523	0.00134999	0.01967	SPIKE	18	12	1.88	16	2.5	4.5	0.75		1.1e-06	1.6e-05	0.0033004	0.0480886
285	Cbfa2t3		0.442857	0.00135999	0.0196895	SPIKE	24	0	12	0	12	4	0.5		1.13e-06	1.64e-05	0.00341806	0.0494857
1941	Tgm2		0.442627	0.00136999	0.0197087	SPIKE	18	1.5	11.62	2	15.5	4.5	0.25		1.15e-06	1.65e-05	0.00345971	0.0497717
625	Fam135a		0.441612	0.00142999	0.0203147	SPIKE	18	12	1.88	16	2.5	4.5	0.75		1.21e-06	1.72e-05	0.00364898	0.0518384
949	Kctd20		0.441642	0.00142999	0.0203147	SPIKE	34	28.33	9.21	20	6.5	8.5	0.75		1.21e-06	1.72e-05	0.00364322	0.0518384
938	Kbtbd3		0.44121	0.00149998	0.0211768	ACOS	28	2.33	0	2	0	28	0.08		1.24e-06	1.75e-05	0.00372661	0.0526123
356	Cers4		0.440295	0.00160998	0.0225895	SPIKE	20	15	3.75	18	4.5	5	0.75		1.3e-06	1.82e-05	0.00390949	0.0548535
257	Cacnb2		0.438049	0.00174998	0.0236338	SPIKE	32	0	16	0	12	5.33	0.5		1.46e-06	2e-05	0.00439528	0.0601835
265	Camsap2		0.437637	0.00174998	0.0236338	SPIKE	29	24.17	11.48	20	9.5	7.25	0.25		1.49e-06	2.02e-05	0.00449052	0.0607556
913	Irf8		0.436689	0.00182998	0.0236338	SPIKE	20	18.33	7.08	22	8.5	5	0.75		1.57e-06	2.02e-05	0.0047172	0.0609216
1075	Map4k4		0.437702	0.00174998	0.0236338	SPIKE	18	13.5	5.62	18	7.5	4.5	0.25		1.49e-06	2.02e-05	0.0044754	0.0607556
1195	Mycl		0.436689	0.00182998	0.0236338	SPIKE	27	18	6.19	16	5.5	6.75	0.25		1.57e-06	2.02e-05	0.0047172	0.0609216
1213	Naa25		0.43881	0.00172998	0.0236338	SPIKE	32	16	0	12	0	8	0.5		1.4e-06	1.95e-05	0.00422449	0.0587209
1277	Nrp1		0.438095	0.00174998	0.0236338	SPIKE	27	18	4.5	16	4	9	0.5		1.46e-06	2e-05	0.00438476	0.0601835
1290	Nup37		0.436689	0.00182998	0.0236338	SPIKE	30	20	5	16	4	7.5	0.5		1.57e-06	2.02e-05	0.0047172	0.0609216
1333	Pax7		0.436689	0.00182998	0.0236338	SPIKE	31	25.83	8.4	20	6.5	7.75	0.75		1.57e-06	2.02e-05	0.0047172	0.0609216
1362	Peli1		0.436885	0.00176998	0.0236338	SPIKE	28	14	0	12	0	9.33	0.5		1.55e-06	2.02e-05	0.00466932	0.0609216
1500	Prrg3		0.436689	0.00182998	0.0236338	SPIKE	30	10	23.12	8	18.5	7.5	0.75		1.57e-06	2.02e-05	0.0047172	0.0609216
1646	Rtn4ip1		0.436689	0.00182998	0.0236338	SPIKE	24	12	0	12	0	8	0.5		1.57e-06	2.02e-05	0.0047172	0.0609216
1743	Slc22a23		0.438754	0.00172998	0.0236338	SPIKE	19	0	8.31	0	10.5	4.75	0.75		1.41e-06	1.95e-05	0.00423679	0.0587209
2161	Zbtb43		0.437291	0.00175998	0.0236338	SPIKE	35	17.5	0	12	0	11.67	0.5		1.52e-06	2.02e-05	0.00457209	0.0609216
24	Abcc1		0.43575	0.00191998	0.0245175	SPIKE	29	4.83	21.15	4	17.5	7.25	0.25		1.64e-06	2.1e-05	0.00495253	0.0632421
1689	Senp3		0.435949	0.00191998	0.0245175	SPIKE	32	16	0	12	0	8	0.5		1.63e-06	2.09e-05	0.00490166	0.0629462
292	Ccdc141		0.434907	0.00197998	0.024728	SPIKE	32	16	0	12	0	10.67	0.5		1.72e-06	2.16e-05	0.00517334	0.0649669
443	Csnk1g1		0.43509	0.00197998	0.024728	SPIKE	32	16	0	12	0	10.67	0.5		1.7e-06	2.15e-05	0.00512465	0.0647129
1206	Myof		0.43515	0.00197998	0.024728	SPIKE	27	18	4.5	16	4	9	0.5		1.7e-06	2.15e-05	0.00510858	0.0647129
1496	Prr14l		0.434601	0.00197998	0.024728	SPIKE	35	32.08	14.58	22	10	5.83	0.5		1.74e-06	2.16e-05	0.00525557	0.0650663
140	Apc2		0.43404	0.00205998	0.0247743	SPIKE	34	28.33	11.33	20	8	5.67	0.5		1.8e-06	2.16e-05	0.00541026	0.0650663
276	Cars2		0.43404	0.00205998	0.0247743	SPIKE	32	16	0	12	0	8	0.5		1.8e-06	2.16e-05	0.00541026	0.0650663
381	Clca3a2		0.43404	0.00205998	0.0247743	SPIKE	30	20	5	16	4	7.5	0.5		1.8e-06	2.16e-05	0.00541026	0.0650663
844	Hfm1		0.43404	0.00205998	0.0247743	SPIKE	18	4.5	13.5	6	18	3	0.5		1.8e-06	2.16e-05	0.00541026	0.0650663
1372	Pgghg		0.43404	0.00205998	0.0247743	SPIKE	35	32.08	14.58	22	10	5.83	0.5		1.8e-06	2.16e-05	0.00541026	0.0650663
1772	Slc6a3		0.43404	0.00205998	0.0247743	SPIKE	34	28.33	11.33	20	8	5.67	0.5		1.8e-06	2.16e-05	0.00541026	0.0650663
2021	Trim59		0.43404	0.00205998	0.0247743	SPIKE	30	20	5	16	4	7.5	0.5		1.8e-06	2.16e-05	0.00541026	0.0650663
843	Hes6		0.432496	0.00218998	0.0259261	SPIKE	33	30.25	11.69	22	8.5	8.25	0.75		1.94e-06	2.31e-05	0.00585787	0.0697372
1186	Mtrf1l		0.432489	0.00218998	0.0259261	SPIKE	32	0	16	0	12	5.33	0.5		1.94e-06	2.31e-05	0.00586001	0.0697372
1874	Suv39h1		0.432381	0.00218998	0.0259261	SPIKE	18	13.5	5.62	18	7.5	4.5	0.25		1.96e-06	2.32e-05	0.00589283	0.0697626
99	Amot		0.4312	0.00230998	0.0265181	SPIKE	20	15	5	18	6	6.67	0.5		2.08e-06	2.39e-05	0.00626101	0.071971
377	Ciz1		0.431303	0.00230998	0.0265181	SPIKE	24	10	22	10	22	8	0.5		2.07e-06	2.39e-05	0.00622806	0.071971
530	Dpp10		0.431174	0.00230998	0.0265181	SPIKE	26	4.33	17.33	4	16	4.33	0.5		2.08e-06	2.39e-05	0.00626936	0.071971
873	Hydin		0.432121	0.00226998	0.0265181	SPIKE	20	13.33	4.58	16	5.5	5	0.25		1.98e-06	2.33e-05	0.00597207	0.0703343
1474	Ppp1r1b		0.431517	0.00227998	0.0265181	SPIKE	34	31.17	14.17	22	10	5.67	0.5		2.04e-06	2.39e-05	0.00616016	0.071971
1927	Tex26		0.431174	0.00230998	0.0265181	SPIKE	18	4.5	12.38	6	16.5	4.5	0.75		2.08e-06	2.39e-05	0.00626936	0.071971
21	Aak1		0.430222	0.00238998	0.0272986	SPIKE	26	2.17	16.79	2	15.5	6.5	0.25		2.18e-06	2.5e-05	0.00658289	0.0751905
458	Cyp4f14		0.429571	0.00243998	0.0274325	SPIKE	24	6	16.5	6	16.5	6	0.75		2.26e-06	2.54e-05	0.00680556	0.0765794
855	Hook3		0.4291	0.00244998	0.0274325	SPIKE	35	26.25	8.75	18	6	11.67	0.5		2.31e-06	2.59e-05	0.00697135	0.0780586
1048	Lsp1		0.429571	0.00243998	0.0274325	SPIKE	27	18	4.5	16	4	9	0.5		2.26e-06	2.54e-05	0.00680556	0.0765794
1069	Manba		0.429571	0.00243998	0.0274325	SPIKE	32	0	16	0	12	5.33	0.5		2.26e-06	2.54e-05	0.00680556	0.0765794
897	Impdh1		0.428088	0.00254997	0.0280004	ACOS	32	13.33	2.67	10	2	32	0.33		2.44e-06	2.69e-05	0.00734073	0.0809975
1801	Snph		0.428185	0.00254997	0.0280004	SPIKE	28	0	12.25	0	10.5	7	0.75		2.42e-06	2.69e-05	0.00730447	0.0809975
1938	Tgfb1i1		0.427968	0.00254997	0.0280004	NSPIKE	20	16.25	5	19.5	6	15	0.75		2.45e-06	2.69e-05	0.00738583	0.0811015
1986	Tmtc3		0.428174	0.00254997	0.0280004	NSPIKE	20	0	10	0	12	13.33	0.5		2.43e-06	2.69e-05	0.00730842	0.0809975
10	3110082I17Rik		0.425691	0.00273997	0.0292392	SPIKE	32	24	8	18	6	8	0.5		2.75e-06	2.94e-05	0.00829129	0.0884794
896	Impa1		0.42654	0.00268997	0.0292392	SPIKE	18	16.5	7.5	22	10	6	0.5		2.64e-06	2.87e-05	0.00794198	0.0863737
1835	Srebf1		0.42687	0.00267997	0.0292392	SPIKE	32	16	0	12	0	10.67	0.5		2.59e-06	2.83e-05	0.00781012	0.0853481
2105	Uvrag		0.426012	0.00271997	0.0292392	SPIKE	18	10.5	1.5	14	2	4.5	0.5		2.71e-06	2.93e-05	0.00815765	0.0882969
2198	Zfp346		0.425785	0.00273997	0.0292392	SPIKE	18	13.5	5.62	18	7.5	4.5	0.25		2.74e-06	2.94e-05	0.00825215	0.0884771
2272	Zscan29		0.425785	0.00273997	0.0292392	SPIKE	35	32.08	12.4	22	8.5	8.75	0.75		2.74e-06	2.94e-05	0.00825215	0.0884771
44	Acsl6		0.424026	0.00294997	0.0304786	SPIKE	19	15.83	7.52	20	9.5	4.75	0.25		2.99e-06	3.1e-05	0.00902034	0.0933517
134	Apaf1		0.424604	0.00292997	0.0304786	SPIKE	30	20	5	16	4	7.5	0.5		2.91e-06	3.03e-05	0.00876053	0.0913426
889	Ikzf1		0.424604	0.00292997	0.0304786	SPIKE	30	20	5	16	4	7.5	0.5		2.91e-06	3.03e-05	0.00876053	0.0913426
1057	Lysmd2		0.42478	0.00291997	0.0304786	NSPIKE	22	13.29	3.67	14.5	4	16.5	0.25		2.88e-06	3.03e-05	0.00868283	0.0913426
1862	Ston2		0.423993	0.00294997	0.0304786	SPIKE	30	15	28.12	12	22.5	7.5	0.75		3e-06	3.1e-05	0.00903536	0.0933517
1882	Sytl1		0.424604	0.00292997	0.0304786	SPIKE	30	20	5	16	4	7.5	0.5		2.91e-06	3.03e-05	0.00876053	0.0913426
2243	Zfp825		0.424604	0.00292997	0.0304786	SPIKE	30	20	5	16	4	7.5	0.5		2.91e-06	3.03e-05	0.00876053	0.0913426
415	Coq4		0.42379	0.00300997	0.0309577	ACOS	23	13.42	7.67	14	8	23	0.25		3.03e-06	3.12e-05	0.00912837	0.0938859
61	Adcy9		0.422756	0.00322997	0.0321592	SPIKE	20	13.33	4.58	16	5.5	5	0.25		3.19e-06	3.21e-05	0.00961661	0.0967193
155	Arhgap32		0.422154	0.00322997	0.0321592	SPIKE	20	15	5	18	6	6.67	0.5		3.29e-06	3.29e-05	0.00991238	0.0992548
414	Commd8		0.422756	0.00322997	0.0321592	SPIKE	35	32.08	14.58	22	10	5.83	0.5		3.19e-06	3.21e-05	0.00961661	0.0967193
765	Gm3417		0.421687	0.00323997	0.0321592	SPIKE	32	16	2	12	1.5	8	0.25		3.37e-06	3.34e-05	0.010148	0.100727
767	Gm3448		0.421687	0.00323997	0.0321592	SPIKE	32	16	2	12	1.5	8	0.25		3.37e-06	3.34e-05	0.010148	0.100727
1047	Lsm10		0.423148	0.00317997	0.0321592	SPIKE	24	22	8.5	22	8.5	6	0.75		3.13e-06	3.18e-05	0.00942857	0.0956747
1151	Morc4		0.423148	0.00317997	0.0321592	SPIKE	18	13.5	4.5	18	6	3	0.5		3.13e-06	3.18e-05	0.00942857	0.0956747
2167	Zdhhc21		0.423148	0.00317997	0.0321592	SPIKE	19	1.58	11.08	2	14	3.17	0.5		3.13e-06	3.18e-05	0.00942857	0.0956747
1349	Pdcd7		0.420447	0.00365996	0.03617	SPIKE	19	3.17	11.48	4	14.5	4.75	0.75		3.58e-06	3.54e-05	0.0107996	0.106729
1284	Ntng1		0.41971	0.00369996	0.036407	SPIKE	33	13.75	28.19	10	20.5	8.25	0.75		3.72e-06	3.66e-05	0.0112054	0.110259
1411	Pknox2		0.417866	0.00413996	0.0405609	SPIKE	32	26.67	12.67	20	9.5	8	0.25		4.08e-06	4e-05	0.0122859	0.12037
133	Ap5m1		0.417405	0.00421996	0.0409913	SPIKE	20	13.33	4.58	16	5.5	5	0.25		4.17e-06	4.05e-05	0.0125712	0.122113
1615	Rnf170		0.417405	0.00421996	0.0409913	SPIKE	20	13.33	4.58	16	5.5	5	0.25		4.17e-06	4.05e-05	0.0125712	0.122113
490	Dglucy		0.416378	0.00441996	0.0425702	SPIKE	24	14	0.5	14	0.5	6	0.75		4.39e-06	4.23e-05	0.0132298	0.127421
2141	Wipf3		0.416378	0.00441996	0.0425702	SPIKE	32	5.33	21.33	4	16	5.33	0.5		4.39e-06	4.23e-05	0.0132298	0.127421
559	Egfr		0.415761	0.00456995	0.0438291	SPIKE	18	4.5	13.5	6	18	3	0.5		4.53e-06	4.34e-05	0.0136411	0.130828
1270	Nr1h3		0.415168	0.00476995	0.0446177	SPIKE	20	18.33	7.08	22	8.5	5	0.75		4.66e-06	4.38e-05	0.0140477	0.131944
1447	Polm		0.415168	0.00476995	0.0446177	SPIKE	32	5.33	21.33	4	16	5.33	0.5		4.66e-06	4.38e-05	0.0140477	0.131944
1526	Pxn		0.415005	0.00476995	0.0446177	SPIKE	19	15.83	7.52	20	9.5	4.75	0.25		4.7e-06	4.4e-05	0.0141614	0.132465
1776	Slc7a7		0.415168	0.00476995	0.0446177	SPIKE	19	1.58	11.08	2	14	3.17	0.5		4.66e-06	4.38e-05	0.0140477	0.131944
1903	Tbce		0.41557	0.00469995	0.0446177	ACOS	28	18.67	2.33	16	2	28	0.58		4.57e-06	4.36e-05	0.0137708	0.131517
1959	Tmc5		0.415168	0.00476995	0.0446177	SPIKE	20	13.33	4.58	16	5.5	5	0.25		4.66e-06	4.38e-05	0.0140477	0.131944
1180	Mtif3		0.413861	0.00495995	0.0462048	SPIKE	32	16	2	12	1.5	8	0.25		4.97e-06	4.63e-05	0.0149862	0.139605
1358	Pdss1		0.413107	0.00516995	0.0475761	SPIKE	25	6.25	17.19	6	16.5	6.25	0.75		5.16e-06	4.76e-05	0.0155539	0.143304
1659	Safb2		0.413083	0.00516995	0.0475761	SPIKE	19	14.25	3.56	18	4.5	4.75	0.75		5.17e-06	4.76e-05	0.0155725	0.143304
2031	Trp53		0.413396	0.00516995	0.0475761	SPIKE	30	10	23.12	8	18.5	7.5	0.75		5.09e-06	4.72e-05	0.0153338	0.14226
1515	Ptprs		0.412301	0.00523995	0.0480258	SPIKE	32	24	10	18	7.5	8	0.25		5.37e-06	4.92e-05	0.0161837	0.148328
1913	Tdp1		0.412054	0.00537995	0.0489145	SPIKE	32	24	8	18	6	8	0.5		5.44e-06	4.94e-05	0.0163822	0.148947
2039	Tspan14		0.412054	0.00537995	0.0489145	SPIKE	18	10.5	1.5	14	2	3	0.5		5.44e-06	4.94e-05	0.0163822	0.148947
1052	Luzp1		0.410362	0.00583994	0.0528852	SPIKE	32	16	0	12	0	10.67	0.5		5.91e-06	5.35e-05	0.0178008	0.161201
538	Dus3l		0.409607	0.00601994	0.0540843	SPIKE	24	14	0.5	14	0.5	6	0.75		6.13e-06	5.48e-05	0.0184706	0.165174
2145	Xdh		0.409627	0.00601994	0.0540843	SPIKE	20	0	8.75	0	10.5	5	0.75		6.12e-06	5.48e-05	0.0184532	0.165174
166	Arhgef7		0.409038	0.00633994	0.0555131	SPIKE	23	5.75	18.69	6	19.5	5.75	0.25		6.3e-06	5.58e-05	0.0189924	0.167975
476	Ddx55		0.408359	0.00634994	0.0555131	SPIKE	19	9.5	0	12	0	6.33	0.5		6.52e-06	5.7e-05	0.0196324	0.171633
555	Efcab7		0.408393	0.00634994	0.0555131	SPIKE	30	22.5	9.38	18	7.5	7.5	0.25		6.5e-06	5.7e-05	0.0195994	0.171633
589	Enpp4		0.409462	0.00632994	0.0555131	SPIKE	32	16	0	12	0	8	0.5		6.17e-06	5.48e-05	0.0186029	0.165174
1100	Mdga2		0.409462	0.00632994	0.0555131	SPIKE	32	8	24	6	18	8	0.5		6.17e-06	5.48e-05	0.0186029	0.165174
1622	Rnf25		0.409462	0.00632994	0.0555131	SPIKE	34	28.33	11.33	20	8	5.67	0.5		6.17e-06	5.48e-05	0.0186029	0.165174
2165	Zcchc9		0.408712	0.00634994	0.0555131	SPIKE	35	2.92	20.42	2	14	8.75	0.5		6.4e-06	5.64e-05	0.0192969	0.170007
1356	Pdia5		0.408261	0.00639994	0.0557358	ACOS	18	9	7.5	12	10	18	0.08		6.55e-06	5.7e-05	0.0197259	0.171789
1979	Tmem240		0.407087	0.00688993	0.0597741	SPIKE	20	6.67	15.42	8	18.5	5	0.75		6.93e-06	6.01e-05	0.0208873	0.181209
160	Arhgef10		0.406439	0.00694993	0.0598378	SPIKE	34	17	2.12	12	1.5	8.5	0.25		7.15e-06	6.18e-05	0.0215553	0.186143
796	Gpank1		0.406378	0.00694993	0.0598378	SPIKE	24	8	21.5	8	21.5	6	0.25		7.18e-06	6.18e-05	0.0216197	0.186143
1768	Slc3a2		0.406081	0.00698993	0.0599551	SPIKE	19	15.83	7.52	20	9.5	4.75	0.25		7.28e-06	6.24e-05	0.0219332	0.188129
1653	Ryr1		0.405065	0.00729993	0.0621451	SPIKE	20	16.67	7.92	20	9.5	5	0.25		7.65e-06	6.51e-05	0.0230408	0.196149
1742	Slc1a3		0.40515	0.00727993	0.0621451	SPIKE	20	1.67	10.42	2	12.5	5	0.75		7.62e-06	6.51e-05	0.0229463	0.196079
259	Cacnb4		0.404387	0.00764992	0.0641634	SPIKE	23	3.83	15.33	4	16	3.83	0.5		7.9e-06	6.63e-05	0.0238093	0.199699
516	Dnajc17		0.404524	0.00764992	0.0641634	SPIKE	28	14	0	12	0	9.33	0.5		7.85e-06	6.63e-05	0.0236525	0.199699
1660	Samd10		0.404485	0.00764992	0.0641634	SPIKE	29	4.83	19.33	4	16	4.83	0.5		7.86e-06	6.63e-05	0.0236965	0.199699
2121	Vrk1		0.404387	0.00764992	0.0641634	SPIKE	24	16	2.5	16	2.5	6	0.75		7.9e-06	6.63e-05	0.0238093	0.199699
2201	Zfp384		0.403957	0.00767992	0.0641782	ACOS	23	9.58	0	10	0	23	0.42		8.07e-06	6.74e-05	0.0243092	0.203143
204	Atr		0.402837	0.00799992	0.066123	SPIKE	20	13.33	4.58	16	5.5	5	0.25		8.52e-06	7.04e-05	0.0256586	0.21208
316	Cd83		0.403162	0.00794992	0.066123	SPIKE	32	8	24	6	18	8	0.5		8.38e-06	6.98e-05	0.0252598	0.210313
2110	Vax1		0.402905	0.00798992	0.066123	SPIKE	23	3.83	15.33	4	16	7.67	0.5		8.49e-06	7.04e-05	0.0255748	0.21208
226	Bcl9		0.402147	0.00827992	0.0681893	SPIKE	21	7	16.19	8	18.5	5.25	0.75		8.8e-06	7.25e-05	0.0265249	0.218446
813	Gria3		0.401676	0.00868991	0.0707963	SPIKE	20	16.67	7.92	20	9.5	5	0.25		9.01e-06	7.36e-05	0.0271328	0.221845
983	Lcorl		0.401235	0.00868991	0.0707963	SPIKE	18	10.5	1.5	14	2	3	0.5		9.2e-06	7.49e-05	0.0277143	0.225787
2054	Ttll11		0.401798	0.00868991	0.0707963	SPIKE	30	2.5	17.5	2	14	7.5	0.5		8.95e-06	7.35e-05	0.0269742	0.221344
117	Ankrd44		0.400472	0.00875991	0.0709395	SPIKE	18	1.5	10.5	2	14	6	0.5		9.54e-06	7.73e-05	0.0287465	0.232834
909	Iqsec1		0.400445	0.00876991	0.0709395	SPIKE	21	19.25	8.75	22	10	7	0.5		9.55e-06	7.73e-05	0.0287842	0.232834
1471	Ppp1r12b		0.400047	0.00913991	0.0736703	SPIKE	24	14	0.5	14	0.5	6	0.75		9.74e-06	7.84e-05	0.0293374	0.236363
878	Idnk		0.399835	0.00939991	0.0747062	SPIKE	18	4.5	13.5	6	18	3	0.5		9.84e-06	7.84e-05	0.0296364	0.236363
1142	Mme		0.399872	0.00939991	0.0747062	SPIKE	21	7	16.19	8	18.5	5.25	0.75		9.82e-06	7.84e-05	0.0295848	0.236363
1673	Scn8a		0.399872	0.00939991	0.0747062	SPIKE	30	5	20	4	16	7.5	0.5		9.82e-06	7.84e-05	0.0295848	0.236363
1786	Smap2		0.399643	0.00939991	0.0747062	NSPIKE	33	24.75	8.25	18	6	22	0.5		9.93e-06	7.89e-05	0.0299101	0.237712
227	Bcor		0.398873	0.0095799	0.0756081	SPIKE	19	17.42	7.92	22	10	4.75	0.5		1.03e-05	8.13e-05	0.0310315	0.244912
1861	Stn1		0.398902	0.0095799	0.0756081	SPIKE	34	28.33	11.33	20	8	8.5	0.5		1.03e-05	8.13e-05	0.0309894	0.244912
139	Apbb3		0.398334	0.0096499	0.075897	SPIKE	18	16.5	7.5	22	10	6	0.5		1.06e-05	8.31e-05	0.0318398	0.250422
721	Gh		0.398154	0.0097899	0.0767326	NSPIKE	35	19.69	0	13.5	0	26.25	0.75		1.07e-05	8.33e-05	0.0321142	0.251029
2063	Txlng		0.398139	0.0099099	0.0774062	SPIKE	29	26.58	12.08	22	10	4.83	0.5		1.07e-05	8.33e-05	0.0321379	0.251029
26	Abcd3		0.397584	0.0103599	0.0785758	NSPIKE	22	13.29	3.67	14.5	4	16.5	0.25		1.1e-05	8.44e-05	0.0329991	0.254261
179	Asb1		0.396863	0.0104399	0.0785758	SPIKE	24	14	0.5	14	0.5	6	0.75		1.13e-05	8.53e-05	0.0341504	0.257033
398	Cnnm2		0.396863	0.0104399	0.0785758	SPIKE	24	12	0	12	0	8	0.5		1.13e-05	8.53e-05	0.0341504	0.257033
413	Colec12		0.397837	0.0103599	0.0785758	SPIKE	19	1.58	12.27	2	15.5	4.75	0.25		1.08e-05	8.37e-05	0.0326034	0.252067
639	Fam228b		0.397837	0.0103599	0.0785758	SPIKE	21	14	3.5	16	4	7	0.5		1.08e-05	8.37e-05	0.0326034	0.252067
917	Isl2		0.396863	0.0104399	0.0785758	SPIKE	18	0	9	0	12	3	0.5		1.13e-05	8.53e-05	0.0341504	0.257033
1332	Pax2		0.397837	0.0103599	0.0785758	SPIKE	19	1.58	12.27	2	15.5	4.75	0.25		1.08e-05	8.37e-05	0.0326034	0.252067
1432	Plppr5		0.396863	0.0104399	0.0785758	SPIKE	18	4.5	13.5	6	18	3	0.5		1.13e-05	8.53e-05	0.0341504	0.257033
1635	Rps6ka5		0.396863	0.0104399	0.0785758	SPIKE	34	28.33	11.33	20	8	5.67	0.5		1.13e-05	8.53e-05	0.0341504	0.257033
1745	Slc25a13		0.396863	0.0104399	0.0785758	SPIKE	20	13.33	4.58	16	5.5	5	0.25		1.13e-05	8.53e-05	0.0341504	0.257033
2222	Zfp612		0.397279	0.0104299	0.0785758	SPIKE	19	9.5	1.19	12	1.5	4.75	0.25		1.11e-05	8.53e-05	0.0334807	0.257033
1099	Mdc1		0.396196	0.0105499	0.0788813	SPIKE	20	0	8.75	0	10.5	5	0.75		1.17e-05	8.75e-05	0.0352485	0.263552
1982	Tmem255b		0.396196	0.0105499	0.0788813	SPIKE	24	8	20	8	20	4	0.5		1.17e-05	8.75e-05	0.0352485	0.263552
1412	Pla1a		0.396067	0.0107399	0.0800386	SPIKE	27	18	6.19	16	5.5	6.75	0.25		1.18e-05	8.77e-05	0.0354659	0.264308
2120	Vps9d1		0.395737	0.0110999	0.0824511	SPIKE	33	30.25	13.75	22	10	5.5	0.5		1.2e-05	8.88e-05	0.0360248	0.267596
2259	Zkscan17		0.394919	0.0113399	0.0839595	SPIKE	24	22	8.5	22	8.5	6	0.75		1.24e-05	9.2e-05	0.0374486	0.277266
647	Fbxo31		0.394291	0.0113999	0.0841297	NSPIKE	33	19.25	2.75	14	2	22	0.5		1.28e-05	9.45e-05	0.0385759	0.284685
56	Adamtsl4		0.392837	0.0121399	0.084459	SPIKE	20	15	3.75	18	4.5	5	0.75		1.37e-05	9.99e-05	0.0413146	0.30099
98	Ambra1		0.391503	0.0125499	0.084459	SPIKE	28	16.33	2.33	14	2	9.33	0.5		1.46e-05	0.0001	0.0439896	0.302607
123	Ankzf1		0.390563	0.0129299	0.084459	SPIKE	32	8	24	6	18	8	0.5		1.53e-05	0.0001	0.0459707	0.302607
137	Apbb1ip		0.388514	0.0141199	0.084459	SPIKE	30	20	5	16	4	7.5	0.5		1.68e-05	0.0001	0.0505898	0.302607
143	Apol8		0.388514	0.0141199	0.084459	SPIKE	18	0	9	0	12	3	0.5		1.68e-05	0.0001	0.0505898	0.302607
283	Catsperg2		0.388514	0.0141199	0.084459	SPIKE	24	12	0	12	0	8	0.5		1.68e-05	0.0001	0.0505898	0.302607
291	Ccdc125		0.388514	0.0141199	0.084459	SPIKE	30	20	5	16	4	7.5	0.5		1.68e-05	0.0001	0.0505898	0.302607
305	Ccdc88b		0.388514	0.0141199	0.084459	SPIKE	30	20	5	16	4	7.5	0.5		1.68e-05	0.0001	0.0505898	0.302607
322	Cdc6		0.388514	0.0141199	0.084459	SPIKE	30	20	5	16	4	7.5	0.5		1.68e-05	0.0001	0.0505898	0.302607
347	Cep55		0.388514	0.0141199	0.084459	SPIKE	32	16	0	12	0	8	0.5		1.68e-05	0.0001	0.0505898	0.302607
372	Chit1		0.388514	0.0141199	0.084459	SPIKE	30	20	5	16	4	7.5	0.5		1.68e-05	0.0001	0.0505898	0.302607
403	Cntn6		0.388514	0.0141199	0.084459	SPIKE	32	16	0	12	0	8	0.5		1.68e-05	0.0001	0.0505898	0.302607
437	Cryab		0.388514	0.0141199	0.084459	SPIKE	34	28.33	11.33	20	8	5.67	0.5		1.68e-05	0.0001	0.0505898	0.302607
454	Cxcr4		0.388514	0.0141199	0.084459	SPIKE	30	20	5	16	4	7.5	0.5		1.68e-05	0.0001	0.0505898	0.302607
569	Elane		0.388514	0.0141199	0.084459	SPIKE	30	20	5	16	4	7.5	0.5		1.68e-05	0.0001	0.0505898	0.302607
621	F13a1		0.388514	0.0141199	0.084459	SPIKE	32	16	0	12	0	8	0.5		1.68e-05	0.0001	0.0505898	0.302607
642	Fam76a		0.389717	0.0134199	0.084459	ACOS	34	28.33	0	20	0	34	0.83		1.59e-05	0.0001	0.0478285	0.302607
720	Ggta1		0.388514	0.0141199	0.084459	SPIKE	30	20	5	16	4	7.5	0.5		1.68e-05	0.0001	0.0505898	0.302607
726	Gli2		0.388962	0.0139199	0.084459	SPIKE	24	6	16.5	6	16.5	6	0.75		1.64e-05	0.0001	0.0495448	0.302607
728	Glrb		0.393504	0.0120399	0.084459	SPIKE	30	20	5	16	4	7.5	0.5		1.33e-05	9.77e-05	0.0400362	0.294288
730	Gm11419		0.388514	0.0141199	0.084459	SPIKE	30	20	5	16	4	7.5	0.5		1.68e-05	0.0001	0.0505898	0.302607
740	Gm16867		0.392769	0.0121399	0.084459	SPIKE	26	2.17	16.79	2	15.5	6.5	0.25		1.38e-05	9.99e-05	0.0414473	0.30099
745	Gm26550		0.388514	0.0141199	0.084459	SPIKE	32	16	0	12	0	8	0.5		1.68e-05	0.0001	0.0505898	0.302607
747	Gm28154		0.388514	0.0141199	0.084459	SPIKE	35	32.08	14.58	22	10	5.83	0.5		1.68e-05	0.0001	0.0505898	0.302607
749	Gm29050		0.388514	0.0141199	0.084459	SPIKE	30	20	5	16	4	7.5	0.5		1.68e-05	0.0001	0.0505898	0.302607
750	Gm29975		0.388514	0.0141199	0.084459	SPIKE	24	12	0	12	0	8	0.5		1.68e-05	0.0001	0.0505898	0.302607
757	Gm32316		0.388514	0.0141199	0.084459	SPIKE	35	32.08	14.58	22	10	5.83	0.5		1.68e-05	0.0001	0.0505898	0.302607
759	Gm3255		0.388514	0.0141199	0.084459	SPIKE	18	4.5	13.5	6	18	3	0.5		1.68e-05	0.0001	0.0505898	0.302607
783	Gm9358		0.389538	0.0134299	0.084459	SPIKE	22	3.67	14.67	4	16	3.67	0.5		1.6e-05	0.0001	0.0482303	0.302607
795	Golph3l		0.391412	0.0125499	0.084459	SPIKE	18	6	16.12	8	21.5	4.5	0.25		1.47e-05	0.0001	0.0441774	0.302607
815	Grid2ip		0.388514	0.0141199	0.084459	SPIKE	18	4.5	13.5	6	18	3	0.5		1.68e-05	0.0001	0.0505898	0.302607
826	Gtf2h4		0.390807	0.0128799	0.084459	SPIKE	34	25.5	10.62	18	7.5	8.5	0.25		1.51e-05	0.0001	0.045449	0.302607
840	Heph		0.388514	0.0141199	0.084459	SPIKE	24	12	0	12	0	8	0.5		1.68e-05	0.0001	0.0505898	0.302607
922	Itgb2		0.388514	0.0141199	0.084459	SPIKE	30	20	5	16	4	7.5	0.5		1.68e-05	0.0001	0.0505898	0.302607
994	Lilra6		0.388514	0.0141199	0.084459	SPIKE	30	20	5	16	4	7.5	0.5		1.68e-05	0.0001	0.0505898	0.302607
1086	Mapt		0.393451	0.0120399	0.084459	SPIKE	35	32.08	12.4	22	8.5	8.75	0.75		1.33e-05	9.77e-05	0.0401361	0.294288
1094	Mcam		0.388514	0.0141199	0.084459	SPIKE	30	20	5	16	4	7.5	0.5		1.68e-05	0.0001	0.0505898	0.302607
1144	Mmp9		0.388514	0.0141199	0.084459	SPIKE	30	20	5	16	4	7.5	0.5		1.68e-05	0.0001	0.0505898	0.302607
1158	Mpo		0.388514	0.0141199	0.084459	SPIKE	30	20	5	16	4	7.5	0.5		1.68e-05	0.0001	0.0505898	0.302607
1162	Mrap2		0.388514	0.0141199	0.084459	SPIKE	18	0	9	0	12	3	0.5		1.68e-05	0.0001	0.0505898	0.302607
1210	Mzt2		0.390876	0.0128799	0.084459	NSPIKE	22	18.79	9.17	20.5	10	16.5	0.25		1.5e-05	0.0001	0.0453026	0.302607
1258	Nlgn4l		0.388514	0.0141199	0.084459	SPIKE	32	16	0	12	0	8	0.5		1.68e-05	0.0001	0.0505898	0.302607
1259	Nlrp4g		0.388514	0.0141199	0.084459	SPIKE	32	8	24	6	18	8	0.5		1.68e-05	0.0001	0.0505898	0.302607
1260	Nlrx1		0.388514	0.0141199	0.084459	SPIKE	32	8	24	6	18	8	0.5		1.68e-05	0.0001	0.0505898	0.302607
1268	Npas1		0.388514	0.0141199	0.084459	SPIKE	18	0	9	0	12	3	0.5		1.68e-05	0.0001	0.0505898	0.302607
1303	Osbpl5		0.388514	0.0141199	0.084459	SPIKE	18	0	9	0	12	3	0.5		1.68e-05	0.0001	0.0505898	0.302607
1312	P2rx5		0.388514	0.0141199	0.084459	SPIKE	34	28.33	11.33	20	8	5.67	0.5		1.68e-05	0.0001	0.0505898	0.302607
1330	Parp9		0.390563	0.0129299	0.084459	SPIKE	30	20	5	16	4	7.5	0.5		1.53e-05	0.0001	0.0459707	0.302607
1359	Pdxdc1		0.389689	0.0134199	0.084459	ACOS	24	10	6	10	6	24	0.17		1.59e-05	0.0001	0.0478895	0.302607
1400	Pira1		0.388514	0.0141199	0.084459	SPIKE	30	20	5	16	4	7.5	0.5		1.68e-05	0.0001	0.0505898	0.302607
1401	Pira2		0.388514	0.0141199	0.084459	SPIKE	30	20	5	16	4	7.5	0.5		1.68e-05	0.0001	0.0505898	0.302607
1424	Plekhh2		0.388514	0.0141199	0.084459	SPIKE	32	16	0	12	0	8	0.5		1.68e-05	0.0001	0.0505898	0.302607
1491	Prkcz		0.389902	0.0133999	0.084459	SPIKE	34	28.33	11.33	20	8	8.5	0.5		1.57e-05	0.0001	0.0474157	0.302607
1511	Ptprc		0.388514	0.0141199	0.084459	SPIKE	30	20	5	16	4	7.5	0.5		1.68e-05	0.0001	0.0505898	0.302607
1556	Rars2		0.390955	0.0127799	0.084459	SPIKE	34	28.33	11.33	20	8	5.67	0.5		1.5e-05	0.0001	0.0451342	0.302607
1583	Rgl1		0.389963	0.0133999	0.084459	SPIKE	32	8	24	6	18	8	0.5		1.57e-05	0.0001	0.0472807	0.302607
1594	Rhobtb1		0.388514	0.0141199	0.084459	SPIKE	30	20	5	16	4	7.5	0.5		1.68e-05	0.0001	0.0505898	0.302607
1628	Robo3		0.388514	0.0141199	0.084459	SPIKE	32	24	8	18	6	8	0.5		1.68e-05	0.0001	0.0505898	0.302607
1657	S100a9		0.388514	0.0141199	0.084459	SPIKE	30	20	5	16	4	7.5	0.5		1.68e-05	0.0001	0.0505898	0.302607
1678	Sell		0.388514	0.0141199	0.084459	SPIKE	30	20	5	16	4	7.5	0.5		1.68e-05	0.0001	0.0505898	0.302607
1714	Sgsm3		0.389556	0.0134299	0.084459	NSPIKE	35	21.15	5.83	14.5	4	26.25	0.25		1.6e-05	0.0001	0.0481891	0.302607
1723	Shd		0.388514	0.0141199	0.084459	SPIKE	32	8	24	6	18	8	0.5		1.68e-05	0.0001	0.0505898	0.302607
1771	Slc5a10		0.388514	0.0141199	0.084459	SPIKE	24	12	0	12	0	8	0.5		1.68e-05	0.0001	0.0505898	0.302607
1781	Slc9b2		0.392769	0.0121399	0.084459	SPIKE	18	15	7.12	20	9.5	4.5	0.25		1.38e-05	9.99e-05	0.0414473	0.30099
1843	Sspo		0.388514	0.0141199	0.084459	SPIKE	34	28.33	11.33	20	8	5.67	0.5		1.68e-05	0.0001	0.0505898	0.302607
1880	Syt16		0.391412	0.0125499	0.084459	SPIKE	18	0	7.88	0	10.5	4.5	0.75		1.47e-05	0.0001	0.0441774	0.302607
1911	Tcp10a		0.388514	0.0141199	0.084459	SPIKE	30	20	5	16	4	7.5	0.5		1.68e-05	0.0001	0.0505898	0.302607
1929	Tex33		0.388514	0.0141199	0.084459	SPIKE	30	20	5	16	4	7.5	0.5		1.68e-05	0.0001	0.0505898	0.302607
2129	Wdfy4		0.388514	0.0141199	0.084459	SPIKE	34	28.33	11.33	20	8	5.67	0.5		1.68e-05	0.0001	0.0505898	0.302607
2130	Wdr17		0.388514	0.0141199	0.084459	SPIKE	30	20	5	16	4	7.5	0.5		1.68e-05	0.0001	0.0505898	0.302607
2227	Zfp647		0.388514	0.0141199	0.084459	SPIKE	30	20	5	16	4	7.5	0.5		1.68e-05	0.0001	0.0505898	0.302607
2239	Zfp758		0.388514	0.0141199	0.084459	SPIKE	32	16	0	12	0	8	0.5		1.68e-05	0.0001	0.0505898	0.302607
1050	Ltf		0.38841	0.0143499	0.0856095	NSPIKE	23	13.42	1.92	14	2	17.25	0.5		1.69e-05	0.000101	0.0508373	0.303289
613	Etv1		0.386966	0.0146699	0.0863849	SPIKE	30	2.5	17.5	2	14	5	0.5		1.8e-05	0.000107	0.0543681	0.320984
846	Hinfp		0.387701	0.0146399	0.0863849	SPIKE	21	1.75	12.25	2	14	5.25	0.5		1.74e-05	0.000103	0.0525429	0.311828
934	Kat7		0.387061	0.0146699	0.0863849	ACOS	23	19.17	0	20	0	23	0.83		1.8e-05	0.000106	0.0541292	0.320406
1454	Pou2f1		0.386803	0.0146699	0.0863849	SPIKE	21	8.75	19.25	10	22	5.25	0.5		1.82e-05	0.000107	0.0547835	0.322598
2075	Uevld		0.387701	0.0146399	0.0863849	SPIKE	35	29.17	11.67	20	8	11.67	0.5		1.74e-05	0.000103	0.0525429	0.311828
1241	Negr1		0.386044	0.0157998	0.0927937	SPIKE	28	21	8.75	18	7.5	7	0.25		1.88e-05	0.000111	0.0567456	0.333289
1404	Pja1		0.38584	0.0158398	0.0927937	ACOS	20	11.67	8.33	14	10	20	0.17		1.9e-05	0.000111	0.0572836	0.335582
1040	Lrrcc1		0.384661	0.0160098	0.0935485	SPIKE	20	13.33	4.58	16	5.5	5	0.25		2.01e-05	0.000117	0.0604961	0.35349
677	Fndc3c1		0.384264	0.0165398	0.0956617	SPIKE	20	18.33	7.08	22	8.5	5	0.75		2.04e-05	0.000118	0.0616154	0.356825
1253	Nin		0.384264	0.0165398	0.0956617	SPIKE	24	14	0.5	14	0.5	6	0.75		2.04e-05	0.000118	0.0616154	0.356825
1908	Tcf3		0.384236	0.0165398	0.0956617	ACOS	22	11	9.17	12	10	22	0.08		2.05e-05	0.000118	0.0616947	0.356825
2067	Tyw5		0.384264	0.0165398	0.0956617	SPIKE	30	20	5	16	4	7.5	0.5		2.04e-05	0.000118	0.0616154	0.356825
689	Frmd5		0.383919	0.0167198	0.0962131	SPIKE	23	9.58	22.52	10	23.5	5.75	0.25		2.08e-05	0.000119	0.0626025	0.359676
2062	Tut7		0.383924	0.0167198	0.0962131	SPIKE	32	24	10	18	7.5	8	0.25		2.08e-05	0.000119	0.0625891	0.359676
650	Fcer1g		0.383844	0.0168598	0.09653	SPIKE	27	18	4.5	16	4	9	0.5		2.08e-05	0.000119	0.0628207	0.359676
1518	Ptrh1		0.383844	0.0168598	0.09653	SPIKE	28	14	0	12	0	9.33	0.5		2.08e-05	0.000119	0.0628207	0.359676
108	Ankib1		0.382876	0.0170498	0.0968708	ACOS	32	2.67	0	2	0	32	0.08		2.18e-05	0.000124	0.0656838	0.37355
378	Clasp1		0.383006	0.0170498	0.0968708	SPIKE	18	6	16.12	8	21.5	4.5	0.25		2.17e-05	0.000124	0.0652938	0.372897
1346	Pcsk6		0.382859	0.0170498	0.0968708	SPIKE	18	0	7.88	0	10.5	4.5	0.75		2.18e-05	0.000124	0.0657369	0.37355
1645	Rtca		0.382762	0.0170898	0.0968708	SPIKE	18	16.5	6.38	22	8.5	4.5	0.75		2.19e-05	0.000124	0.0660299	0.374279
70	Adipor2		0.382473	0.0174298	0.0981769	SPIKE	32	24	8	18	6	10.67	0.5		2.22e-05	0.000125	0.0669126	0.377989
564	Eif2ak4		0.382358	0.0174498	0.0981769	SPIKE	18	13.5	5.62	18	7.5	4.5	0.25		2.23e-05	0.000126	0.0672667	0.378458
1122	Mib1		0.382439	0.0174298	0.0981769	NSPIKE	20	16.25	5	19.5	6	15	0.75		2.22e-05	0.000125	0.067017	0.377989
1403	Pitrm1		0.381985	0.0179798	0.100909	SPIKE	24	12	0	12	0	8	0.5		2.27e-05	0.000127	0.0684311	0.384059
570	Elavl2		0.380789	0.0183598	0.101785	SPIKE	32	26.67	8.67	20	6.5	8	0.75		2.4e-05	0.000133	0.0722875	0.400755
724	Glb1l		0.381151	0.0183498	0.101785	SPIKE	18	10.5	0.38	14	0.5	4.5	0.75		2.36e-05	0.000131	0.0710987	0.396096
1428	Plk5		0.381015	0.0183498	0.101785	SPIKE	18	10.5	1.5	14	2	6	0.5		2.37e-05	0.000132	0.071541	0.397586
2173	Zfand1		0.381151	0.0183498	0.101785	SPIKE	18	4.5	12.38	6	16.5	4.5	0.75		2.36e-05	0.000131	0.0710987	0.396096
2203	Zfp410		0.38142	0.0183198	0.101785	SPIKE	32	16	0	12	0	8	0.5		2.33e-05	0.00013	0.0702277	0.393171
180	Asb7		0.380174	0.0189298	0.103931	SPIKE	19	17.42	7.92	22	10	4.75	0.5		2.47e-05	0.000136	0.0743494	0.409165
317	Cdadc1		0.380091	0.0189298	0.103931	ACOS	20	16.67	1.67	20	2	20	0.75		2.48e-05	0.000136	0.074633	0.409165
702	Gale		0.38015	0.0189298	0.103931	SPIKE	35	26.25	8.75	18	6	11.67	0.5		2.47e-05	0.000136	0.0744308	0.409165
1557	Rasgef1b		0.380091	0.0189298	0.103931	SPIKE	34	28.33	11.33	20	8	5.67	0.5		2.48e-05	0.000136	0.074633	0.409165
1892	Tanc1		0.38007	0.0191498	0.104886	SPIKE	20	6.67	16.67	8	20	6.67	0.5		2.48e-05	0.000136	0.0747046	0.409165
217	Bbc3		0.379532	0.0196898	0.107069	SPIKE	18	13.5	4.5	18	6	3	0.5		2.54e-05	0.000138	0.0765608	0.416322
352	Cep85		0.379532	0.0196898	0.107069	SPIKE	32	16	0	12	0	8	0.5		2.54e-05	0.000138	0.0765608	0.416322
2244	Zfp827		0.379596	0.0196898	0.107069	SPIKE	23	5.75	18.69	6	19.5	5.75	0.25		2.53e-05	0.000138	0.0763387	0.416322
508	Dmxl1		0.379069	0.0199098	0.10775	SPIKE	18	10.5	1.5	14	2	4.5	0.5		2.6e-05	0.000141	0.0781954	0.424196
1421	Plekha6		0.378947	0.0199098	0.10775	NSPIKE	21	20.56	8.75	23.5	10	15.75	0.75		2.61e-05	0.000141	0.078633	0.425554
60	Adcy3		0.378726	0.0203298	0.109209	SPIKE	28	14	0	12	0	9.33	0.5		2.64e-05	0.000142	0.0794271	0.426803
169	Armc6		0.378726	0.0203298	0.109209	SPIKE	27	18	4.5	16	4	9	0.5		2.64e-05	0.000142	0.0794271	0.426803
577	Eml1		0.377964	0.0206598	0.109209	SPIKE	32	16	0	12	0	8	0.5		2.73e-05	0.000144	0.0822282	0.434662
614	Evpl		0.377964	0.0206598	0.109209	SPIKE	19	1.58	11.08	2	14	3.17	0.5		2.73e-05	0.000144	0.0822282	0.434662
1080	Mapk14		0.378055	0.0206398	0.109209	SPIKE	27	18	4.5	16	4	9	0.5		2.72e-05	0.000144	0.0818919	0.434662
1427	Plin2		0.378178	0.0206298	0.109209	SPIKE	24	20	9.5	20	9.5	6	0.25		2.7e-05	0.000144	0.0814332	0.434662
1621	Rnf213		0.377964	0.0206598	0.109209	SPIKE	34	28.33	11.33	20	8	5.67	0.5		2.73e-05	0.000144	0.0822282	0.434662
1667	Sbk1		0.377964	0.0206598	0.109209	SPIKE	18	4.5	13.5	6	18	3	0.5		2.73e-05	0.000144	0.0822282	0.434662
2049	Ttc41		0.378726	0.0203298	0.109209	SPIKE	27	18	4.5	16	4	9	0.5		2.64e-05	0.000142	0.0794271	0.426803
2135	Wdr59		0.377964	0.0206598	0.109209	SPIKE	30	10	23.12	8	18.5	7.5	0.75		2.73e-05	0.000144	0.0822282	0.434662
1450	Pomgnt2		0.377616	0.0210098	0.110545	NSPIKE	25	9.9	20.83	9.5	20	18.75	0.75		2.77e-05	0.000146	0.0835427	0.440586
1633	Rps6ka1		0.377552	0.0210098	0.110545	SPIKE	23	5.75	18.69	6	19.5	5.75	0.25		2.78e-05	0.000146	0.0837857	0.440845
154	Arhgap26		0.377052	0.0211298	0.110919	SPIKE	18	10.5	1.5	14	2	4.5	0.5		2.84e-05	0.000149	0.0857063	0.449909
1731	Six3os1		0.376884	0.0212998	0.111554	SPIKE	28	7	19.25	6	16.5	7	0.75		2.87e-05	0.00015	0.0863634	0.452314
1220	Napg		0.376508	0.0217898	0.113597	SPIKE	24	0	12	0	12	4	0.5		2.92e-05	0.000152	0.0878467	0.459024
2088	Usp10		0.376455	0.0217898	0.113597	SPIKE	20	10	18.75	12	22.5	5	0.75		2.92e-05	0.000152	0.0880588	0.459077
254	Cacna1b		0.376274	0.0219398	0.113856	SPIKE	21	7	16.19	8	18.5	5.25	0.75		2.95e-05	0.000153	0.0887821	0.461789
1072	Map3k11		0.376062	0.0219398	0.113856	SPIKE	34	28.33	11.33	20	8	5.67	0.5		2.98e-05	0.000154	0.0896388	0.46518
717	Gga3		0.375534	0.0220798	0.114062	NSPIKE	31	12.92	28.42	10	22	20.67	0.5		3.05e-05	0.000157	0.0918078	0.474271
1023	Lrmda		0.375773	0.0220798	0.114062	SPIKE	32	24	10	18	7.5	8	0.25		3.01e-05	0.000156	0.0908208	0.470241
214	B3galnt2		0.375154	0.0225498	0.116117	SPIKE	34	28.33	11.33	20	8	5.67	0.5		3.1e-05	0.00016	0.0933957	0.48138
1125	Mical3		0.374989	0.0225798	0.116117	SPIKE	24	12	0	12	0	8	0.5		3.12e-05	0.000161	0.0940957	0.483824
359	Cfap57		0.374783	0.0229398	0.116231	SPIKE	27	2.25	14.06	2	12.5	6.75	0.75		3.15e-05	0.000161	0.0949756	0.483824
861	Hps3		0.374783	0.0229398	0.116231	SPIKE	27	2.25	14.06	2	12.5	6.75	0.75		3.15e-05	0.000161	0.0949756	0.483824
912	Irf5		0.374743	0.0229598	0.116231	SPIKE	27	18	4.5	16	4	9	0.5		3.16e-05	0.000161	0.0951471	0.483824
1214	Nabp2		0.374818	0.0229398	0.116231	ACOS	33	24.75	22	18	16	33	0.08		3.15e-05	0.000161	0.0948226	0.483824
1243	Nek1		0.37462	0.0229598	0.116231	NSPIKE	28	14	0	12	0	18.67	0.5		3.18e-05	0.000161	0.0956766	0.484349
1417	Plcl2		0.374783	0.0229398	0.116231	SPIKE	18	1.5	11.62	2	15.5	4.5	0.25		3.15e-05	0.000161	0.0949756	0.483824
2255	Zfyve21		0.374642	0.0229598	0.116231	ACOS	22	9.17	7.33	10	8	22	0.08		3.17e-05	0.000161	0.0955823	0.484349
92	Aldh5a1		0.373999	0.0234698	0.117763	SPIKE	28	11.67	25.67	10	22	9.33	0.5		3.27e-05	0.000164	0.0983896	0.493686
358	Cfap44		0.373999	0.0234698	0.117763	SPIKE	27	6.75	18.56	6	16.5	6.75	0.75		3.27e-05	0.000164	0.0983896	0.493686
1616	Rnf180		0.37411	0.0234698	0.117763	NSPIKE	20	16.25	5	19.5	6	15	0.75		3.25e-05	0.000164	0.0978985	0.4934
2199	Zfp362		0.374185	0.0234698	0.117763	SPIKE	23	5.75	17.25	6	18	7.67	0.5		3.24e-05	0.000164	0.097568	0.492827
216	Bahcc1		0.373812	0.0236598	0.117827	SPIKE	28	21	8.75	18	7.5	7	0.25		3.29e-05	0.000165	0.0992216	0.495672
868	Hspbp1		0.373834	0.0236598	0.117827	NSPIKE	19	11.48	3.17	14.5	4	14.25	0.25		3.29e-05	0.000165	0.0991266	0.495672
1194	Mybpc1		0.373608	0.0236898	0.117827	SPIKE	24	6	16.5	6	16.5	6	0.75		3.32e-05	0.000165	0.100138	0.49806
1374	Pglyrp1		0.373608	0.0236898	0.117827	SPIKE	27	18	4.5	16	4	9	0.5		3.32e-05	0.000165	0.100138	0.49806
1994	Tns3		0.373064	0.0241998	0.120101	SPIKE	20	6.67	15.42	8	18.5	5	0.75		3.41e-05	0.000169	0.10262	0.50929
1114	Mfhas1		0.372954	0.0246598	0.121258	SPIKE	19	7.92	17.42	10	22	4.75	0.5		3.42e-05	0.000169	0.103127	0.50958
1533	Rab3c		0.372449	0.0246998	0.121258	SPIKE	22	7.33	18.33	8	20	5.5	0.5		3.5e-05	0.000172	0.105491	0.517887
1565	Rbm45		0.372839	0.0246598	0.121258	SPIKE	34	5.67	24.79	4	17.5	8.5	0.25		3.44e-05	0.00017	0.103659	0.5111
1569	Rcan3		0.372954	0.0246598	0.121258	SPIKE	18	1.5	11.62	2	15.5	4.5	0.25		3.42e-05	0.000169	0.103127	0.50958
1799	Sned1		0.372497	0.0246998	0.121258	SPIKE	19	6.33	15.83	8	20	4.75	0.5		3.49e-05	0.000172	0.105264	0.517887
14	4933427D14Rik		0.371884	0.0251697	0.121998	SPIKE	32	8	24	6	18	8	0.5		3.59e-05	0.000175	0.108197	0.527305
215	B4galt2		0.371855	0.0251697	0.121998	SPIKE	27	18	4.5	16	4	9	0.5		3.6e-05	0.000175	0.108338	0.527305
371	Chil1		0.371665	0.0252797	0.121998	SPIKE	32	5.33	21.33	4	16	5.33	0.5		3.63e-05	0.000176	0.109264	0.529225
744	Gm24105		0.371994	0.0251697	0.121998	SPIKE	29	2.42	16.92	2	14	7.25	0.5		3.57e-05	0.000175	0.107668	0.526298
803	Gpr85		0.371665	0.0252797	0.121998	SPIKE	32	5.33	21.33	4	16	5.33	0.5		3.63e-05	0.000176	0.109264	0.529225
1398	Pip5k1a		0.37233	0.0249298	0.121998	NSPIKE	22	13.29	3.67	14.5	4	16.5	0.25		3.52e-05	0.000172	0.106057	0.519544
2046	Ttc21b		0.371579	0.0252797	0.121998	SPIKE	21	19.25	8.75	22	10	7	0.5		3.64e-05	0.000176	0.109688	0.529225
2204	Zfp414		0.371579	0.0252797	0.121998	SPIKE	21	10.5	19.69	12	22.5	5.25	0.75		3.64e-05	0.000176	0.109688	0.529225
1839	Srr		0.371536	0.0254797	0.122702	NSPIKE	18	16.12	6	21.5	8	13.5	0.75		3.65e-05	0.000176	0.109896	0.529225
2103	Utp25		0.370828	0.0263997	0.126864	SPIKE	32	8	26	6	19.5	8	0.25		3.76e-05	0.000181	0.113431	0.545094
1819	Spata18		0.370624	0.0267497	0.128005	SPIKE	35	17.5	0	12	0	11.67	0.5		3.8e-05	0.000182	0.114472	0.54778
1856	Stau1		0.370686	0.0267497	0.128005	SPIKE	26	10.83	22.21	10	20.5	6.5	0.75		3.79e-05	0.000182	0.114156	0.54742
69	Adgrv1		0.368786	0.0279197	0.128205	SPIKE	29	4.83	21.15	4	17.5	7.25	0.25		4.12e-05	0.000189	0.124244	0.57052
194	Atg16l2		0.368786	0.0279197	0.128205	SPIKE	27	2.25	14.06	2	12.5	6.75	0.75		4.12e-05	0.000189	0.124244	0.57052
240	Borcs8		0.368856	0.0279197	0.128205	SPIKE	30	20	3.12	16	2.5	7.5	0.75		4.11e-05	0.000189	0.123862	0.57052
460	Cyp4v3		0.368856	0.0279197	0.128205	SPIKE	29	12.08	24.77	10	20.5	7.25	0.75		4.11e-05	0.000189	0.123862	0.57052
487	Dgkd		0.368856	0.0279197	0.128205	SPIKE	24	12	1.5	12	1.5	6	0.25		4.11e-05	0.000189	0.123862	0.57052
572	Elk3		0.369821	0.0271597	0.128205	SPIKE	19	14.25	4.75	18	6	6.33	0.5		3.94e-05	0.000187	0.118651	0.56388
623	Fam110a		0.369516	0.0275197	0.128205	SPIKE	30	20	5	16	4	7.5	0.5		3.99e-05	0.000189	0.120273	0.569543
683	Foxred1		0.368786	0.0279197	0.128205	SPIKE	24	16	2.5	16	2.5	6	0.75		4.12e-05	0.000189	0.124244	0.57052
692	Frmpd1		0.368786	0.0279197	0.128205	SPIKE	32	16	2	12	1.5	8	0.25		4.12e-05	0.000189	0.124244	0.57052
748	Gm28876		0.368786	0.0279197	0.128205	SPIKE	32	8	22	6	16.5	8	0.75		4.12e-05	0.000189	0.124244	0.57052
829	Gucy1a1		0.37014	0.0269997	0.128205	SPIKE	24	12	0	12	0	8	0.5		3.88e-05	0.000185	0.116972	0.557396
880	Ifitm1		0.368786	0.0279197	0.128205	SPIKE	30	20	3.12	16	2.5	7.5	0.75		4.12e-05	0.000189	0.124244	0.57052
950	Kctd6		0.369075	0.0279197	0.128205	SPIKE	20	11.67	1.67	14	2	6.67	0.5		4.07e-05	0.000189	0.122658	0.57052
1056	Lyrm7		0.368786	0.0279197	0.128205	SPIKE	34	28.33	11.33	20	8	8.5	0.5		4.12e-05	0.000189	0.124244	0.57052
1110	Mettl15		0.368786	0.0279197	0.128205	SPIKE	30	20	3.12	16	2.5	7.5	0.75		4.12e-05	0.000189	0.124244	0.57052
1254	Ninl		0.370176	0.0269997	0.128205	SPIKE	19	11.08	0.4	14	0.5	4.75	0.75		3.88e-05	0.000185	0.116787	0.557396
1392	Pik3c2b		0.368786	0.0279197	0.128205	SPIKE	30	0	13.12	0	10.5	7.5	0.75		4.12e-05	0.000189	0.124244	0.57052
1407	Pkhd1l1		0.368786	0.0279197	0.128205	SPIKE	18	10.5	1.5	14	2	4.5	0.5		4.12e-05	0.000189	0.124244	0.57052
1495	Prps2		0.369787	0.0272197	0.128205	SPIKE	20	5	16.25	6	19.5	5	0.25		3.94e-05	0.000187	0.118829	0.56388
1675	Scyl3		0.368786	0.0279197	0.128205	SPIKE	19	14.25	3.56	18	4.5	4.75	0.75		4.12e-05	0.000189	0.124244	0.57052
368	Chd1l		0.36849	0.0285497	0.130834	SPIKE	32	0	16	0	12	5.33	0.5		4.18e-05	0.000191	0.12589	0.576912
1618	Rnf19a		0.368317	0.0288697	0.131769	SPIKE	27	18	4.5	16	4	9	0.5		4.21e-05	0.000192	0.126864	0.579041
2083	Unc79		0.368425	0.0288197	0.131769	SPIKE	24	12	1.5	12	1.5	6	0.25		4.19e-05	0.000192	0.126254	0.577414
93	Alg3		0.368081	0.0289997	0.131924	NSPIKE	22	15.12	5.5	16.5	6	16.5	0.25		4.25e-05	0.000194	0.128197	0.583952
147	Arel1		0.367877	0.0290197	0.131924	SPIKE	20	10	0	12	0	6.67	0.5		4.29e-05	0.000195	0.129363	0.588086
234	Birc3		0.365148	0.0316297	0.134301	SPIKE	20	13.33	2.08	16	2.5	5	0.75		4.84e-05	0.000206	0.145957	0.620113
532	Dsel		0.365884	0.0310397	0.134301	SPIKE	18	16.5	6.38	22	8.5	4.5	0.75		4.69e-05	0.000206	0.141296	0.620113
654	Fcnb		0.365148	0.0316297	0.134301	SPIKE	20	1.67	10.42	2	12.5	5	0.75		4.84e-05	0.000206	0.145957	0.620113
700	Gabra4		0.365148	0.0316297	0.134301	SPIKE	20	13.33	2.08	16	2.5	5	0.75		4.84e-05	0.000206	0.145957	0.620113
714	Gcnt1		0.365148	0.0316297	0.134301	SPIKE	20	1.67	10.42	2	12.5	5	0.75		4.84e-05	0.000206	0.145957	0.620113
734	Gm13160		0.365148	0.0316297	0.134301	SPIKE	28	21	8.75	18	7.5	7	0.25		4.84e-05	0.000206	0.145957	0.620113
746	Gm26911		0.365148	0.0316297	0.134301	SPIKE	20	13.33	2.08	16	2.5	5	0.75		4.84e-05	0.000206	0.145957	0.620113
752	Gm30352		0.365148	0.0316297	0.134301	SPIKE	28	0	14	0	12	7	0.5		4.84e-05	0.000206	0.145957	0.620113
766	Gm34414		0.365148	0.0316297	0.134301	SPIKE	28	14	0	12	0	9.33	0.5		4.84e-05	0.000206	0.145957	0.620113
768	Gm35315		0.365148	0.0316297	0.134301	SPIKE	20	10	18.75	12	22.5	5	0.75		4.84e-05	0.000206	0.145957	0.620113
800	Gpr173		0.365366	0.0312297	0.134301	SPIKE	18	0	9	0	12	3	0.5		4.8e-05	0.000206	0.144566	0.620113
808	Gramd4		0.365079	0.0316697	0.134301	SPIKE	24	4	14.5	4	14.5	6	0.75		4.86e-05	0.000206	0.146402	0.620842
814	Gria4		0.365884	0.0310397	0.134301	SPIKE	18	12	1.88	16	2.5	4.5	0.75		4.69e-05	0.000206	0.141296	0.620113
837	Hdhd5		0.365148	0.0316297	0.134301	SPIKE	20	11.67	1.67	14	2	6.67	0.5		4.84e-05	0.000206	0.145957	0.620113
851	Hmgxb3		0.366234	0.0310297	0.134301	ACOS	32	16	8	12	6	32	0.25		4.62e-05	0.000206	0.139131	0.620113
946	Kctd14		0.365148	0.0316297	0.134301	SPIKE	20	8.33	17.08	10	20.5	5	0.75		4.84e-05	0.000206	0.145957	0.620113
963	Kiss1r		0.365148	0.0316297	0.134301	SPIKE	30	15	28.12	12	22.5	7.5	0.75		4.84e-05	0.000206	0.145957	0.620113
979	L3mbtl4		0.365148	0.0316297	0.134301	SPIKE	24	0	12	0	12	4	0.5		4.84e-05	0.000206	0.145957	0.620113
1000	Liph		0.365148	0.0316297	0.134301	SPIKE	32	0	16	0	12	5.33	0.5		4.84e-05	0.000206	0.145957	0.620113
1090	Matk		0.365148	0.0316297	0.134301	SPIKE	28	21	8.75	18	7.5	7	0.25		4.84e-05	0.000206	0.145957	0.620113
1143	Mmp8		0.365148	0.0316297	0.134301	SPIKE	20	1.67	10.42	2	12.5	5	0.75		4.84e-05	0.000206	0.145957	0.620113
1148	Mok		0.365148	0.0316297	0.134301	SPIKE	28	14	0	12	0	9.33	0.5		4.84e-05	0.000206	0.145957	0.620113
1244	Nek10		0.365148	0.0316297	0.134301	SPIKE	28	21	8.75	18	7.5	7	0.25		4.84e-05	0.000206	0.145957	0.620113
1249	Nfe2		0.365148	0.0316297	0.134301	SPIKE	27	18	4.5	16	4	9	0.5		4.84e-05	0.000206	0.145957	0.620113
1719	Sh3d21		0.365148	0.0316297	0.134301	SPIKE	27	18	4.5	16	4	9	0.5		4.84e-05	0.000206	0.145957	0.620113
1815	Sp110		0.365148	0.0316297	0.134301	SPIKE	27	18	4.5	16	4	9	0.5		4.84e-05	0.000206	0.145957	0.620113
1846	St3gal4		0.365148	0.0316297	0.134301	SPIKE	24	10	20.5	10	20.5	6	0.75		4.84e-05	0.000206	0.145957	0.620113
1884	Sytl5		0.365148	0.0316297	0.134301	SPIKE	24	6	16.5	6	16.5	6	0.75		4.84e-05	0.000206	0.145957	0.620113
1899	Tbc1d24		0.365148	0.0316297	0.134301	SPIKE	27	18	4.5	16	4	9	0.5		4.84e-05	0.000206	0.145957	0.620113
1968	Tmem143		0.3669	0.0301397	0.134301	NSPIKE	28	14	0	12	0	18.67	0.5		4.48e-05	0.000203	0.135092	0.6129
1974	Tmem171		0.365148	0.0316297	0.134301	SPIKE	27	18	4.5	16	4	9	0.5		4.84e-05	0.000206	0.145957	0.620113
2020	Trim50		0.365148	0.0316297	0.134301	SPIKE	20	5	13.75	6	16.5	5	0.75		4.84e-05	0.000206	0.145957	0.620113
2151	Ypel1		0.365148	0.0316297	0.134301	SPIKE	20	10	18.75	12	22.5	5	0.75		4.84e-05	0.000206	0.145957	0.620113
2219	Zfp583		0.365148	0.0316297	0.134301	SPIKE	24	0	12	0	12	4	0.5		4.84e-05	0.000206	0.145957	0.620113
2242	Zfp819		0.365148	0.0316297	0.134301	SPIKE	27	18	4.5	16	4	9	0.5		4.84e-05	0.000206	0.145957	0.620113
2245	Zfp853		0.365148	0.0316297	0.134301	SPIKE	27	18	4.5	16	4	9	0.5		4.84e-05	0.000206	0.145957	0.620113
366	Cgnl1		0.364833	0.0319897	0.135029	SPIKE	28	0	14	0	12	7	0.5		4.91e-05	0.000208	0.148001	0.626212
1629	Rpap1		0.364757	0.0320197	0.135029	SPIKE	22	3.67	14.67	4	16	3.67	0.5		4.93e-05	0.000208	0.148495	0.626212
2153	Zbtb1		0.364782	0.0320197	0.135029	SPIKE	19	0	9.5	0	12	6.33	0.5		4.92e-05	0.000208	0.148329	0.626212
5	1700019D03Rik		0.36279	0.0339197	0.135262	SPIKE	27	2.25	14.06	2	12.5	6.75	0.75		5.37e-05	0.000215	0.1619	0.64662
13	4932438A13Rik		0.364257	0.0326697	0.135262	SPIKE	35	2.92	20.42	2	14	11.67	0.5		5.04e-05	0.00021	0.151797	0.633029
102	Anapc13		0.363607	0.0332597	0.135262	NSPIKE	31	21.31	7.75	16.5	6	23.25	0.25		5.18e-05	0.000214	0.1562	0.645772
135	Apba1		0.362754	0.0339197	0.135262	NSPIKE	27	19.69	4.5	17.5	4	20.25	0.75		5.38e-05	0.000215	0.162153	0.64662
220	Bcan		0.36279	0.0339197	0.135262	SPIKE	18	0	7.88	0	10.5	4.5	0.75		5.37e-05	0.000215	0.1619	0.64662
236	Bmerb1		0.363261	0.0337397	0.135262	NSPIKE	20	11.67	1.67	14	2	15	0.5		5.26e-05	0.000215	0.158586	0.64662
270	Capn5		0.364218	0.0326697	0.135262	SPIKE	24	12	0	12	0	8	0.5		5.05e-05	0.00021	0.152061	0.633029
287	Cbs		0.36279	0.0339197	0.135262	SPIKE	21	0	9.19	0	10.5	5.25	0.75		5.37e-05	0.000215	0.1619	0.64662
307	Cck		0.363109	0.0337397	0.135262	SPIKE	20	8.33	17.08	10	20.5	5	0.75		5.3e-05	0.000215	0.159649	0.64662
376	Cit		0.364218	0.0326697	0.135262	SPIKE	35	32.08	14.58	22	10	5.83	0.5		5.05e-05	0.00021	0.152061	0.633029
385	Clcn5		0.363109	0.0337397	0.135262	SPIKE	24	10	20.5	10	20.5	6	0.75		5.3e-05	0.000215	0.159649	0.64662
558	Eftud2		0.362814	0.0339197	0.135262	ACOS	20	13.33	0	16	0	20	0.67		5.37e-05	0.000215	0.161729	0.64662
807	Gramd2		0.36279	0.0339197	0.135262	SPIKE	30	20	3.12	16	2.5	7.5	0.75		5.37e-05	0.000215	0.1619	0.64662
853	Hmmr		0.36279	0.0339197	0.135262	SPIKE	18	13.5	5.62	18	7.5	4.5	0.25		5.37e-05	0.000215	0.1619	0.64662
886	Igsf9b		0.36444	0.0326697	0.135262	SPIKE	20	5	13.75	6	16.5	5	0.75		5e-05	0.00021	0.150584	0.633029
918	Ism1		0.364218	0.0326697	0.135262	SPIKE	32	16	0	12	0	8	0.5		5.05e-05	0.00021	0.152061	0.633029
995	Lima1		0.363372	0.0337197	0.135262	SPIKE	30	15	28.12	12	22.5	7.5	0.75		5.24e-05	0.000215	0.157816	0.64662
1073	Map3k3		0.364257	0.0326697	0.135262	SPIKE	33	27.5	11	20	8	11	0.5		5.04e-05	0.00021	0.151797	0.633029
1299	Ogfod1		0.364218	0.0326697	0.135262	SPIKE	32	16	0	12	0	8	0.5		5.05e-05	0.00021	0.152061	0.633029
1350	Pde1a		0.36279	0.0339197	0.135262	SPIKE	18	7.5	15.38	10	20.5	4.5	0.75		5.37e-05	0.000215	0.1619	0.64662
1375	Pgm2		0.36279	0.0339197	0.135262	SPIKE	30	2.5	17.5	2	14	5	0.5		5.37e-05	0.000215	0.1619	0.64662
1698	Serpinb1c		0.363372	0.0337197	0.135262	SPIKE	27	18	4.5	16	4	9	0.5		5.24e-05	0.000215	0.157816	0.64662
1761	Slc37a4		0.363598	0.0332597	0.135262	SPIKE	20	15	3.75	18	4.5	5	0.75		5.19e-05	0.000214	0.156258	0.645772
1765	Slc39a11		0.36279	0.0339197	0.135262	SPIKE	30	20	3.12	16	2.5	7.5	0.75		5.37e-05	0.000215	0.1619	0.64662
1812	Sort1		0.363203	0.0337397	0.135262	SPIKE	20	16.67	7.92	20	9.5	5	0.25		5.28e-05	0.000215	0.158994	0.64662
1821	Spata2l		0.363319	0.0337397	0.135262	SPIKE	20	16.67	7.92	20	9.5	5	0.25		5.25e-05	0.000215	0.158186	0.64662
1917	Tdrd3		0.363803	0.0332597	0.135262	NSPIKE	32	24	8	18	6	21.33	0.5		5.14e-05	0.000214	0.154856	0.643488
2137	Wdr63		0.36279	0.0339197	0.135262	SPIKE	30	20	3.12	16	2.5	7.5	0.75		5.37e-05	0.000215	0.1619	0.64662
2160	Zbtb41		0.363109	0.0337397	0.135262	SPIKE	28	21	8.75	18	7.5	7	0.25		5.3e-05	0.000215	0.159649	0.64662
2235	Zfp710		0.36369	0.0332597	0.135262	SPIKE	32	8	22	6	16.5	8	0.75		5.17e-05	0.000214	0.155629	0.645518
2250	Zfp946		0.363109	0.0337397	0.135262	SPIKE	27	18	4.5	16	4	9	0.5		5.3e-05	0.000215	0.159649	0.64662
393	Clvs1		0.362361	0.0346097	0.136143	SPIKE	18	6	15	8	20	4.5	0.5		5.48e-05	0.000216	0.164968	0.651344
535	Dtx1		0.362216	0.0346097	0.136143	NSPIKE	29	15.1	2.42	12.5	2	21.75	0.25		5.51e-05	0.000217	0.166019	0.654004
609	Esyt2		0.362517	0.0346097	0.136143	SPIKE	18	10.5	1.5	14	2	4.5	0.5		5.44e-05	0.000216	0.163845	0.651001
968	Klhl26		0.36195	0.0346197	0.136143	SPIKE	28	14	0	12	0	9.33	0.5		5.57e-05	0.000219	0.167959	0.660502
1022	Lrig2		0.36244	0.0346097	0.136143	NSPIKE	20	15.42	6.67	18.5	8	15	0.25		5.46e-05	0.000216	0.164397	0.651001
1535	Rab3gap1		0.36244	0.0346097	0.136143	NSPIKE	20	3.33	13.33	4	16	15	0.5		5.46e-05	0.000216	0.164397	0.651001
1814	Sox6		0.362619	0.0344297	0.136143	SPIKE	27	2.25	14.06	2	12.5	6.75	0.75		5.41e-05	0.000216	0.163112	0.649304
2118	Vps37c		0.362349	0.0346097	0.136143	SPIKE	18	13.5	4.5	18	6	3	0.5		5.48e-05	0.000216	0.165057	0.651344
318	Cdc14a		0.36167	0.0354196	0.139048	SPIKE	19	7.92	17.42	10	22	6.33	0.5		5.64e-05	0.000222	0.170031	0.667496
203	Atp9b		0.360659	0.0367696	0.140703	SPIKE	21	5.25	14.44	6	16.5	5.25	0.75		5.9e-05	0.000226	0.177702	0.679996
447	Ctnna2		0.360659	0.0367696	0.140703	SPIKE	35	5.83	23.33	4	16	8.75	0.5		5.9e-05	0.000226	0.177702	0.679996
495	Dhx57		0.360659	0.0367696	0.140703	SPIKE	19	17.42	7.92	22	10	4.75	0.5		5.9e-05	0.000226	0.177702	0.679996
635	Fam189b		0.361463	0.0359696	0.140703	SPIKE	18	16.5	7.5	22	10	6	0.5		5.69e-05	0.000223	0.171574	0.670633
1193	Myb		0.361287	0.0363996	0.140703	SPIKE	30	20	5	16	4	7.5	0.5		5.74e-05	0.000223	0.172895	0.670633
1224	Nat8		0.360659	0.0367696	0.140703	SPIKE	18	15	6	20	8	4.5	0.5		5.9e-05	0.000226	0.177702	0.679996
1292	Nvl		0.36094	0.0367696	0.140703	SPIKE	32	2.67	20.67	2	15.5	8	0.25		5.83e-05	0.000225	0.175539	0.678571
1318	Palb2		0.361287	0.0363996	0.140703	SPIKE	18	4.5	13.5	6	18	3	0.5		5.74e-05	0.000223	0.172895	0.670633
1587	Rgs22		0.361287	0.0363996	0.140703	SPIKE	30	20	5	16	4	7.5	0.5		5.74e-05	0.000223	0.172895	0.670633
1693	Septin8		0.360659	0.0367696	0.140703	SPIKE	30	20	3.12	16	2.5	7.5	0.75		5.9e-05	0.000226	0.177702	0.679996
1872	Sult1a1		0.361287	0.0363996	0.140703	SPIKE	32	16	0	12	0	8	0.5		5.74e-05	0.000223	0.172895	0.670633
2025	Trmt10a		0.361287	0.0363996	0.140703	SPIKE	30	20	5	16	4	7.5	0.5		5.74e-05	0.000223	0.172895	0.670633
2084	Unc93b1		0.361287	0.0363996	0.140703	SPIKE	30	20	5	16	4	7.5	0.5		5.74e-05	0.000223	0.172895	0.670633
2131	Wdr33		0.361096	0.0367696	0.140703	SPIKE	18	10.5	1.5	14	2	4.5	0.5		5.79e-05	0.000224	0.174344	0.675101
2154	Zbtb14		0.360659	0.0367696	0.140703	SPIKE	18	12	4.12	16	5.5	4.5	0.25		5.9e-05	0.000226	0.177702	0.679996
320	Cdc42ep3		0.360346	0.0370296	0.141222	SPIKE	19	1.58	11.08	2	14	3.17	0.5		5.98e-05	0.000228	0.180144	0.687027
1464	Ppil2		0.360448	0.0369996	0.141222	SPIKE	31	0	13.56	0	10.5	7.75	0.75		5.95e-05	0.000227	0.179343	0.685121
8	2810408A11Rik		0.356966	0.0416596	0.145182	SPIKE	18	1.5	11.62	2	15.5	4.5	0.25		6.92e-05	0.000242	0.20858	0.730374
9	2900026A02Rik		0.356966	0.0416596	0.145182	SPIKE	19	15.83	5.15	20	6.5	4.75	0.75		6.92e-05	0.000242	0.20858	0.730374
124	Ano2		0.356966	0.0416596	0.145182	SPIKE	29	4.83	21.15	4	17.5	7.25	0.25		6.92e-05	0.000242	0.20858	0.730374
183	Asns		0.358367	0.0393096	0.145182	SPIKE	22	11	0	12	0	7.33	0.5		6.52e-05	0.000242	0.196316	0.730374
225	Bcl2l13		0.357284	0.0408696	0.145182	SPIKE	19	3.17	11.48	4	14.5	4.75	0.75		6.83e-05	0.000242	0.205735	0.730374
362	Cfap97		0.356966	0.0416596	0.145182	SPIKE	18	0	7.88	0	10.5	4.5	0.75		6.92e-05	0.000242	0.20858	0.730374
384	Clcn4		0.357989	0.0397896	0.145182	SPIKE	18	15	7.12	20	9.5	4.5	0.25		6.62e-05	0.000242	0.199558	0.730374
410	Col4a5		0.356966	0.0416596	0.145182	SPIKE	35	0	19.69	0	13.5	8.75	0.25		6.92e-05	0.000242	0.20858	0.730374
456	Cyba		0.35656	0.0421996	0.145182	SPIKE	18	4.5	12.38	6	16.5	4.5	0.75		7.05e-05	0.000243	0.212269	0.733263
459	Cyp4f16		0.359066	0.0389396	0.145182	SPIKE	19	14.25	4.75	18	6	3.17	0.5		6.32e-05	0.00024	0.190451	0.723668
514	Dnaic2		0.356793	0.0418596	0.145182	SPIKE	18	12	1.88	16	2.5	4.5	0.75		6.97e-05	0.000242	0.210147	0.730374
587	Enpp1		0.356966	0.0416596	0.145182	SPIKE	34	28.33	11.33	20	8	8.5	0.5		6.92e-05	0.000242	0.20858	0.730374
588	Enpp2		0.356966	0.0416596	0.145182	SPIKE	35	32.08	12.4	22	8.5	8.75	0.75		6.92e-05	0.000242	0.20858	0.730374
657	Fgf11		0.356966	0.0416596	0.145182	SPIKE	18	10.5	1.5	14	2	4.5	0.5		6.92e-05	0.000242	0.20858	0.730374
662	Fignl2		0.356966	0.0416596	0.145182	SPIKE	18	1.5	11.62	2	15.5	4.5	0.25		6.92e-05	0.000242	0.20858	0.730374
680	Foxj1		0.359066	0.0389396	0.145182	SPIKE	30	10	23.12	8	18.5	7.5	0.75		6.32e-05	0.00024	0.190451	0.723668
708	Gas8		0.356793	0.0418596	0.145182	SPIKE	35	26.25	10.94	18	7.5	8.75	0.25		6.97e-05	0.000242	0.210147	0.730374
723	Gjb1		0.356966	0.0416596	0.145182	SPIKE	18	10.5	1.5	14	2	4.5	0.5		6.92e-05	0.000242	0.20858	0.730374
733	Gm13012		0.358204	0.0397496	0.145182	SPIKE	21	8.75	19.25	10	22	7	0.5		6.56e-05	0.000242	0.19771	0.730374
739	Gm14548		0.356966	0.0416596	0.145182	SPIKE	18	1.5	11.62	2	15.5	4.5	0.25		6.92e-05	0.000242	0.20858	0.730374
773	Gm39383		0.356966	0.0416596	0.145182	SPIKE	18	4.5	12.38	6	16.5	4.5	0.75		6.92e-05	0.000242	0.20858	0.730374
782	Gm9222		0.356966	0.0416596	0.145182	SPIKE	19	15.83	5.15	20	6.5	4.75	0.75		6.92e-05	0.000242	0.20858	0.730374
792	Gns		0.358251	0.0397496	0.145182	SPIKE	18	15	7.12	20	9.5	4.5	0.25		6.55e-05	0.000242	0.197309	0.730374
793	Golga3		0.357219	0.0409096	0.145182	SPIKE	30	20	5	16	4	10	0.5		6.85e-05	0.000242	0.206319	0.730374
798	Gpr160		0.356966	0.0416596	0.145182	SPIKE	19	15.83	7.52	20	9.5	4.75	0.25		6.92e-05	0.000242	0.20858	0.730374
820	Grip1		0.357917	0.0401396	0.145182	SPIKE	24	14	0.5	14	0.5	6	0.75		6.64e-05	0.000242	0.200181	0.730374
834	Hdac10		0.356966	0.0416596	0.145182	SPIKE	18	0	7.88	0	10.5	4.5	0.75		6.92e-05	0.000242	0.20858	0.730374
871	Hvcn1		0.356793	0.0418596	0.145182	SPIKE	18	1.5	11.62	2	15.5	4.5	0.25		6.97e-05	0.000242	0.210147	0.730374
881	Iftap		0.356793	0.0418596	0.145182	SPIKE	21	17.5	8.31	20	9.5	5.25	0.25		6.97e-05	0.000242	0.210147	0.730374
921	Itgad		0.356966	0.0416596	0.145182	SPIKE	18	13.5	5.62	18	7.5	4.5	0.25		6.92e-05	0.000242	0.20858	0.730374
924	Itgb6		0.356793	0.0418596	0.145182	SPIKE	29	4.83	19.33	4	16	4.83	0.5		6.97e-05	0.000242	0.210147	0.730374
974	Kntc1		0.356966	0.0416596	0.145182	SPIKE	18	10.5	1.5	14	2	4.5	0.5		6.92e-05	0.000242	0.20858	0.730374
1146	Mob3c		0.358219	0.0397496	0.145182	SPIKE	20	8.33	17.08	10	20.5	5	0.75		6.56e-05	0.000242	0.19758	0.730374
1147	Mobp		0.356966	0.0416596	0.145182	SPIKE	34	28.33	11.33	20	8	8.5	0.5		6.92e-05	0.000242	0.20858	0.730374
1176	Mtg1		0.356348	0.0421996	0.145182	SPIKE	20	1.67	10.42	2	12.5	5	0.75		7.11e-05	0.000245	0.214219	0.738878
1201	Myo3b		0.356902	0.0416596	0.145182	SPIKE	20	0	8.75	0	10.5	5	0.75		6.94e-05	0.000242	0.209162	0.730374
1291	Nup62cl		0.358254	0.0397496	0.145182	SPIKE	32	0	16	0	12	5.33	0.5		6.55e-05	0.000242	0.197277	0.730374
1315	Pafah2		0.356902	0.0416596	0.145182	SPIKE	28	0	14	0	12	7	0.5		6.94e-05	0.000242	0.209162	0.730374
1329	Parp8		0.356621	0.0421996	0.145182	ACOS	20	15	1.67	18	2	20	0.67		7.03e-05	0.000243	0.21171	0.733263
1397	Pilrb2		0.356966	0.0416596	0.145182	SPIKE	18	4.5	12.38	6	16.5	4.5	0.75		6.92e-05	0.000242	0.20858	0.730374
1430	Plppr1		0.356793	0.0418596	0.145182	SPIKE	18	16.5	6.38	22	8.5	4.5	0.75		6.97e-05	0.000242	0.210147	0.730374
1444	Polb		0.35656	0.0421996	0.145182	SPIKE	34	25.5	10.62	18	7.5	8.5	0.25		7.05e-05	0.000243	0.212269	0.733263
1445	Poli		0.358254	0.0397496	0.145182	SPIKE	28	21	8.75	18	7.5	7	0.25		6.55e-05	0.000242	0.197277	0.730374
1452	Pon3		0.356902	0.0416596	0.145182	SPIKE	24	8	20	8	20	4	0.5		6.94e-05	0.000242	0.209162	0.730374
1457	Ppara		0.356793	0.0418596	0.145182	SPIKE	18	10.5	1.5	14	2	4.5	0.5		6.97e-05	0.000242	0.210147	0.730374
1478	Ppp2r3a		0.35656	0.0421996	0.145182	SPIKE	30	2.5	17.5	2	14	5	0.5		7.05e-05	0.000243	0.212269	0.733263
1485	Prdm16		0.356966	0.0416596	0.145182	SPIKE	34	28.33	11.33	20	8	8.5	0.5		6.92e-05	0.000242	0.20858	0.730374
1498	Prr5l		0.356793	0.0418596	0.145182	SPIKE	35	5.83	23.33	4	16	8.75	0.5		6.97e-05	0.000242	0.210147	0.730374
1588	Rgs3		0.358296	0.0393796	0.145182	SPIKE	18	4.5	13.5	6	18	3	0.5		6.54e-05	0.000242	0.196924	0.730374
1610	Rnd3		0.358296	0.0393796	0.145182	SPIKE	32	24	8	18	6	8	0.5		6.54e-05	0.000242	0.196924	0.730374
1630	Rpap2		0.356966	0.0416596	0.145182	SPIKE	35	2.92	20.42	2	14	8.75	0.5		6.92e-05	0.000242	0.20858	0.730374
1642	Rsad1		0.355995	0.0422196	0.145182	SPIKE	30	22.5	9.38	18	7.5	7.5	0.25		7.22e-05	0.000248	0.217504	0.747937
1674	Scube3		0.359035	0.0389396	0.145182	SPIKE	20	6.67	16.67	8	20	6.67	0.5		6.33e-05	0.00024	0.190707	0.723668
1699	Setd4		0.356966	0.0416596	0.145182	SPIKE	18	6	16.12	8	21.5	4.5	0.25		6.92e-05	0.000242	0.20858	0.730374
1739	Slc17a2		0.356966	0.0416596	0.145182	SPIKE	32	8	22	6	16.5	8	0.75		6.92e-05	0.000242	0.20858	0.730374
1838	Srgn		0.356966	0.0416596	0.145182	SPIKE	18	1.5	11.62	2	15.5	4.5	0.25		6.92e-05	0.000242	0.20858	0.730374
1870	Sugp2		0.358296	0.0393796	0.145182	SPIKE	35	32.08	14.58	22	10	5.83	0.5		6.54e-05	0.000242	0.196924	0.730374
1952	Tjp3		0.358296	0.0393796	0.145182	SPIKE	32	24	8	18	6	8	0.5		6.54e-05	0.000242	0.196924	0.730374
1969	Tmem144		0.356966	0.0416596	0.145182	SPIKE	32	8	26	6	19.5	8	0.25		6.92e-05	0.000242	0.20858	0.730374
1972	Tmem164		0.355995	0.0422196	0.145182	SPIKE	18	4.5	12.38	6	16.5	4.5	0.75		7.22e-05	0.000248	0.217504	0.747937
2086	Uqcc1		0.35704	0.0416596	0.145182	NSPIKE	19	11.48	3.17	14.5	4	14.25	0.25		6.9e-05	0.000242	0.207916	0.730374
2169	Zdhhc4		0.356793	0.0418596	0.145182	SPIKE	34	17	2.12	12	1.5	8.5	0.25		6.97e-05	0.000242	0.210147	0.730374
2187	Zfp260		0.358296	0.0393796	0.145182	SPIKE	32	16	0	12	0	8	0.5		6.54e-05	0.000242	0.196924	0.730374
2218	Zfp558		0.356966	0.0416596	0.145182	SPIKE	18	13.5	5.62	18	7.5	4.5	0.25		6.92e-05	0.000242	0.20858	0.730374
2237	Zfp729a		0.356966	0.0416596	0.145182	SPIKE	19	15.83	5.15	20	6.5	4.75	0.75		6.92e-05	0.000242	0.20858	0.730374
2174	Zfhx2		0.355873	0.0424396	0.145718	SPIKE	19	15.83	5.15	20	6.5	4.75	0.75		7.26e-05	0.000249	0.218653	0.750752
706	Garre1		0.355666	0.0430396	0.14689	SPIKE	35	0	19.69	0	13.5	8.75	0.25		7.32e-05	0.00025	0.220611	0.753931
1171	Mta2		0.355635	0.0430396	0.14689	NSPIKE	25	17.19	6.25	16.5	6	18.75	0.25		7.33e-05	0.00025	0.220905	0.753931
1422	Plekha7		0.355659	0.0430396	0.14689	SPIKE	32	5.33	21.33	4	16	5.33	0.5		7.32e-05	0.00025	0.220676	0.753931
1709	Sgf29		0.355659	0.0430396	0.14689	SPIKE	32	16	0	12	0	8	0.5		7.32e-05	0.00025	0.220676	0.753931
976	Kremen1		0.355409	0.0433796	0.147829	SPIKE	20	13.33	4.58	16	5.5	5	0.25		7.4e-05	0.000252	0.223061	0.760147
1298	Oga		0.355036	0.0441096	0.149867	NSPIKE	18	13.5	4.5	18	6	12	0.5		7.52e-05	0.000256	0.226673	0.770146
1334	Paxx		0.355149	0.0440896	0.149867	SPIKE	18	13.5	5.62	18	7.5	4.5	0.25		7.49e-05	0.000255	0.22557	0.767546
1395	Pik3r3		0.353888	0.0456395	0.154834	SPIKE	18	13.5	4.5	18	6	3	0.5		7.9e-05	0.000268	0.238119	0.807827
22	Aasdh		0.352767	0.0467195	0.155254	SPIKE	20	18.33	7.08	22	8.5	5	0.75		8.29e-05	0.000276	0.249823	0.830188
77	Agrn		0.353076	0.0466595	0.155254	SPIKE	24	12	0	12	0	8	0.5		8.18e-05	0.000276	0.24654	0.830188
208	Atxn7l1		0.3528	0.0467195	0.155254	NSPIKE	18	15	6	20	8	12	0.5		8.28e-05	0.000276	0.249466	0.830188
445	Csrnp3		0.3528	0.0467195	0.155254	NSPIKE	28	12.25	0	10.5	0	21	0.25		8.28e-05	0.000276	0.249466	0.830188
809	Grb7		0.353076	0.0466595	0.155254	SPIKE	18	4.5	13.5	6	18	3	0.5		8.18e-05	0.000276	0.24654	0.830188
940	Kcnh6		0.353076	0.0466595	0.155254	SPIKE	32	16	0	12	0	8	0.5		8.18e-05	0.000276	0.24654	0.830188
1119	Mgat4a		0.352813	0.0466995	0.155254	SPIKE	30	20	5	16	4	7.5	0.5		8.28e-05	0.000276	0.249329	0.830188
1163	Mras		0.3528	0.0467195	0.155254	NSPIKE	22	15.12	5.5	16.5	6	16.5	0.25		8.28e-05	0.000276	0.249466	0.830188
1306	Otof		0.3528	0.0467195	0.155254	NSPIKE	18	15	6	20	8	12	0.5		8.28e-05	0.000276	0.249466	0.830188
1438	Pmp22		0.352767	0.0467195	0.155254	SPIKE	20	18.33	7.08	22	8.5	5	0.75		8.29e-05	0.000276	0.249823	0.830188
1449	Polr3e		0.3528	0.0467195	0.155254	NSPIKE	22	15.12	5.5	16.5	6	16.5	0.25		8.28e-05	0.000276	0.249466	0.830188
1692	Septin4		0.353553	0.0463195	0.155254	SPIKE	35	32.08	14.58	22	10	5.83	0.5		8.02e-05	0.000272	0.241557	0.818271
1705	Sft2d2		0.352767	0.0467195	0.155254	SPIKE	27	18	6.19	16	5.5	6.75	0.25		8.29e-05	0.000276	0.249823	0.830188
2081	Unc13b		0.352767	0.0467195	0.155254	SPIKE	32	5.33	21.33	4	16	5.33	0.5		8.29e-05	0.000276	0.249823	0.830188
157	Arhgap39		0.352373	0.0481095	0.156891	SPIKE	18	13.5	4.5	18	6	3	0.5		8.43e-05	0.000276	0.254057	0.830896
326	Cdk14		0.352373	0.0481095	0.156891	SPIKE	20	13.33	4.58	16	5.5	5	0.25		8.43e-05	0.000276	0.254057	0.830896
550	Edem1		0.352373	0.0481095	0.156891	SPIKE	24	12	0	12	0	8	0.5		8.43e-05	0.000276	0.254057	0.830896
743	Gm21992		0.352462	0.0481095	0.156891	SPIKE	18	16.5	6.38	22	8.5	4.5	0.75		8.4e-05	0.000276	0.253098	0.830896
797	Gpcpd1		0.352462	0.0481095	0.156891	SPIKE	30	20	3.12	16	2.5	7.5	0.75		8.4e-05	0.000276	0.253098	0.830896
936	Kazald1		0.352215	0.0481095	0.156891	NSPIKE	32	18	0	13.5	0	24	0.75		8.49e-05	0.000277	0.255778	0.834121
967	Klhl15		0.352373	0.0481095	0.156891	SPIKE	24	14	0.5	14	0.5	6	0.75		8.43e-05	0.000276	0.254057	0.830896
1128	Mid2		0.352462	0.0481095	0.156891	SPIKE	34	17	2.12	12	1.5	8.5	0.25		8.4e-05	0.000276	0.253098	0.830896
1513	Ptpro		0.352462	0.0481095	0.156891	SPIKE	18	12	1.88	16	2.5	4.5	0.75		8.4e-05	0.000276	0.253098	0.830896
1708	Sgcd		0.352462	0.0481095	0.156891	SPIKE	35	0	15.31	0	10.5	8.75	0.75		8.4e-05	0.000276	0.253098	0.830896
1752	Slc29a4		0.352373	0.0481095	0.156891	SPIKE	34	28.33	11.33	20	8	5.67	0.5		8.43e-05	0.000276	0.254057	0.830896
1923	Tent4b		0.352512	0.0479195	0.156891	ACOS	23	7.67	3.83	8	4	23	0.17		8.38e-05	0.000276	0.252558	0.830896
1945	Thumpd3		0.352222	0.0481095	0.156891	NSPIKE	19	11.08	1.58	14	2	12.67	0.5		8.49e-05	0.000277	0.2557	0.834121
281	Catsper2		0.351051	0.0494395	0.159852	SPIKE	18	10.5	1.5	14	2	4.5	0.5		8.92e-05	0.000288	0.268789	0.869072
336	Cenpq		0.35125	0.0494395	0.159852	NSPIKE	24	12.5	2	12.5	2	18	0.25		8.85e-05	0.000287	0.26652	0.864719
355	Cept1		0.351236	0.0494395	0.159852	SPIKE	35	0	19.69	0	13.5	8.75	0.25		8.85e-05	0.000287	0.266682	0.864719
1225	Nav1		0.35125	0.0494395	0.159852	SPIKE	20	10	18.75	12	22.5	5	0.75		8.85e-05	0.000287	0.26652	0.864719
1320	Pan2		0.351377	0.0494395	0.159852	ACOS	32	21.33	24	16	18	32	0.92		8.8e-05	0.000287	0.265086	0.863237
1883	Sytl2		0.351051	0.0494395	0.159852	SPIKE	18	4.5	12.38	6	16.5	4.5	0.75		8.92e-05	0.000288	0.268789	0.869072
511	Dnah2		0.350908	0.0497595	0.16043	SPIKE	23	5.75	18.69	6	19.5	5.75	0.25		8.98e-05	0.000289	0.270434	0.869864
1501	Prrt3		0.350948	0.0497595	0.16043	ACOS	20	18.33	3.33	22	4	20	0.75		8.96e-05	0.000289	0.269973	0.869864
251	C7		0.350797	0.0501695	0.160613	SPIKE	25	18.75	4.69	18	4.5	6.25	0.75		9.02e-05	0.000289	0.271713	0.869864
1008	LOC115489417		0.350797	0.0501695	0.160613	SPIKE	18	16.5	6.38	22	8.5	4.5	0.75		9.02e-05	0.000289	0.271713	0.869864
1064	Maff		0.350797	0.0501695	0.160613	SPIKE	18	16.5	6.38	22	8.5	4.5	0.75		9.02e-05	0.000289	0.271713	0.869864
1307	Otogl		0.350797	0.0501695	0.160613	SPIKE	18	6	16.12	8	21.5	4.5	0.25		9.02e-05	0.000289	0.271713	0.869864
1481	Ppp4r4		0.350797	0.0501695	0.160613	SPIKE	21	3.5	14	4	16	5.25	0.5		9.02e-05	0.000289	0.271713	0.869864
293	Ccdc148		0.350473	0.0506395	0.161436	SPIKE	30	22.5	7.5	18	6	5	0.5		9.14e-05	0.000292	0.275475	0.879431
1222	Nat14		0.350616	0.0505795	0.161436	ACOS	35	0	0	0	0	35	0		9.09e-05	0.000291	0.273809	0.875343
2164	Zc3h13		0.350426	0.0506395	0.161436	SPIKE	34	28.33	11.33	20	8	8.5	0.5		9.16e-05	0.000292	0.276024	0.879946
188	Asxl2		0.350294	0.0515595	0.163909	SPIKE	32	16	0	12	0	10.67	0.5		9.21e-05	0.000293	0.277574	0.883649
193	Atg13		0.35015	0.0515595	0.163909	NSPIKE	29	19.33	4.83	16	4	24.17	0.5		9.27e-05	0.000295	0.279275	0.887822
264	Camk2g		0.349539	0.0523195	0.16563	NSPIKE	22	11	0	12	0	16.5	0.5		9.51e-05	0.000301	0.286613	0.907342
1167	Mrpl4		0.349698	0.0523195	0.16563	SPIKE	20	11.67	1.67	14	2	6.67	0.5		9.45e-05	0.0003	0.284695	0.902526
2034	Trps1		0.349882	0.0523095	0.16563	SPIKE	18	3	10.88	4	14.5	4.5	0.75		9.38e-05	0.000298	0.282475	0.896738
266	Camta2		0.348952	0.0526995	0.166139	NSPIKE	22	19.71	7.33	21.5	8	16.5	0.75		9.75e-05	0.000307	0.293828	0.926391
760	Gm32771		0.34898	0.0526995	0.166139	SPIKE	20	16.67	7.92	20	9.5	5	0.25		9.74e-05	0.000307	0.293487	0.926391
1326	Parg		0.34895	0.0526995	0.166139	NSPIKE	20	0	10	0	12	13.33	0.5		9.75e-05	0.000307	0.293853	0.926391
1170	Msantd3		0.348364	0.0542395	0.170285	SPIKE	34	28.33	11.33	20	8	8.5	0.5		0.0001	0.000314	0.301234	0.946727
1211	N4bp2		0.348339	0.0542395	0.170285	SPIKE	28	0	14	0	12	7	0.5		0.0001	0.000314	0.301553	0.946727
1757	Slc35d1		0.348458	0.0542395	0.170285	SPIKE	35	8.75	26.25	6	18	11.67	0.5		9.96e-05	0.000313	0.300032	0.944559
2215	Zfp52		0.348045	0.0554794	0.173938	SPIKE	32	16	0	12	0	8	0.5		0.000101	0.000318	0.305309	0.956968
690	Frmd6		0.348018	0.0562894	0.175509	SPIKE	24	10	20.5	10	20.5	6	0.75		0.000101	0.000318	0.305657	0.956968
872	Hyal2		0.347875	0.0562894	0.175509	SPIKE	18	16.5	6.38	22	8.5	4.5	0.75		0.000102	0.000318	0.307517	0.959272
1567	Rbm48		0.347941	0.0562894	0.175509	SPIKE	30	20	5	16	4	7.5	0.5		0.000102	0.000318	0.306653	0.958766
1918	Tdrd5		0.347864	0.0562894	0.175509	SPIKE	27	18	4.5	16	4	9	0.5		0.000102	0.000318	0.307659	0.959272
2035	Tsc22d2		0.34717	0.0565494	0.176078	NSPIKE	20	12.08	3.33	14.5	4	15	0.25		0.000105	0.000327	0.316799	0.986416
542	Dyrk1a		0.346464	0.0574094	0.176818	SPIKE	18	12	1.88	16	2.5	4.5	0.75		0.000108	0.000334	0.326352	1
882	Igdcc4		0.346451	0.0574094	0.176818	SPIKE	32	16	0	12	0	8	0.5		0.000108	0.000334	0.326526	1
1014	Lpar1		0.346467	0.0574094	0.176818	SPIKE	24	14	0.5	14	0.5	6	0.75		0.000108	0.000334	0.326303	1
1053	Ly6e		0.346674	0.0571994	0.176818	SPIKE	34	28.33	11.33	20	8	8.5	0.5		0.000107	0.000334	0.323475	1
1276	Nrip1		0.346421	0.0574094	0.176818	SPIKE	35	32.08	14.58	22	10	5.83	0.5		0.000109	0.000334	0.326937	1
1568	Rcan2		0.346451	0.0574094	0.176818	SPIKE	18	4.5	13.5	6	18	3	0.5		0.000108	0.000334	0.326526	1
2124	Wasf1		0.346421	0.0574094	0.176818	SPIKE	18	0	9	0	12	3	0.5		0.000109	0.000334	0.326937	1
2159	Zbtb37		0.346451	0.0574094	0.176818	SPIKE	27	6.75	21.94	6	19.5	6.75	0.25		0.000108	0.000334	0.326526	1
210	AU040320		0.346096	0.0584194	0.179142	SPIKE	25	18.75	4.69	18	4.5	6.25	0.75		0.00011	0.000338	0.331431	1
212	Azin2		0.345864	0.0584794	0.179142	SPIKE	21	0	9.19	0	10.5	5.25	0.75		0.000111	0.00034	0.334681	1
937	Kbtbd11		0.345922	0.0584794	0.179142	SPIKE	23	3.83	13.9	4	14.5	5.75	0.75		0.000111	0.00034	0.333863	1
1672	Scn3a		0.345932	0.0584794	0.179142	SPIKE	24	4	16	4	16	6	0.5		0.000111	0.00034	0.333733	1
76	Ago3		0.344265	0.0607494	0.181689	SPIKE	19	15.83	5.15	20	6.5	4.75	0.75		0.000119	0.000355	0.357874	1
256	Cacna1g		0.344265	0.0607494	0.181689	SPIKE	19	3.17	13.85	4	17.5	4.75	0.25		0.000119	0.000355	0.357874	1
441	Csmd2		0.3448	0.0606394	0.181689	SPIKE	25	4.17	16.67	4	16	4.17	0.5		0.000116	0.000349	0.349952	1
627	Fam160a2		0.345402	0.0600594	0.181689	SPIKE	32	13.33	31.33	10	23.5	8	0.25		0.000113	0.000344	0.341229	1
656	Fgd4		0.345603	0.0599694	0.181689	ACOS	23	3.83	3.83	4	4	23	0		0.000112	0.000343	0.338373	1
707	Gas7		0.345047	0.0603394	0.181689	SPIKE	18	9	1.12	12	1.5	4.5	0.25		0.000115	0.000347	0.346347	1
819	Grin2d		0.344865	0.0603394	0.181689	SPIKE	32	16	0	12	0	8	0.5		0.000116	0.000349	0.348999	1
1140	Mlxip		0.345316	0.0600794	0.181689	NSPIKE	27	15.19	0	13.5	0	20.25	0.75		0.000114	0.000345	0.342464	1
1402	Pitpnc1		0.345603	0.0599694	0.181689	ACOS	34	25.5	5.67	18	4	34	0.58		0.000112	0.000343	0.338373	1
1531	Qtrt1		0.3448	0.0606394	0.181689	SPIKE	30	17.5	0.62	14	0.5	7.5	0.75		0.000116	0.000349	0.349952	1
1605	Ripor2		0.344265	0.0607494	0.181689	SPIKE	25	0	10.94	0	10.5	6.25	0.75		0.000119	0.000355	0.357874	1
1634	Rps6ka2		0.345537	0.0599994	0.181689	SPIKE	32	16	0	12	0	8	0.5		0.000113	0.000343	0.33931	1
1694	Sergef		0.345155	0.0600794	0.181689	SPIKE	18	16.5	7.5	22	10	6	0.5		0.000114	0.000346	0.344783	1
1832	Src		0.345155	0.0600794	0.181689	SPIKE	26	2.17	16.79	2	15.5	6.5	0.25		0.000114	0.000346	0.344783	1
2055	Ttll13		0.345537	0.0599994	0.181689	SPIKE	20	18.33	7.08	22	8.5	5	0.75		0.000113	0.000343	0.33931	1
2072	Ube2o		0.345769	0.0599194	0.181689	SPIKE	19	6.33	15.83	8	20	4.75	0.5		0.000112	0.000341	0.336017	1
2175	Zfp105		0.344865	0.0603394	0.181689	SPIKE	24	12	0	12	0	8	0.5		0.000116	0.000349	0.348999	1
2191	Zfp280d		0.344298	0.0607494	0.181689	NSPIKE	18	1.5	10.5	2	14	12	0.5		0.000119	0.000355	0.357385	1
246	Brwd3		0.343622	0.0623894	0.186104	SPIKE	24	4	16	4	16	6	0.5		0.000122	0.000364	0.367628	1
1085	Mapkapk3		0.343622	0.0623894	0.186104	SPIKE	24	10	20.5	10	20.5	6	0.75		0.000122	0.000364	0.367628	1
79	Ahcyl2		0.343071	0.0633294	0.188413	NSPIKE	25	15.1	4.17	14.5	4	18.75	0.25		0.000125	0.000371	0.376169	1
450	Cux2		0.343525	0.0633294	0.188413	SPIKE	32	24	8	18	6	10.67	0.5		0.000123	0.000365	0.369106	1
433	Crhr1		0.342827	0.0639294	0.18995	SPIKE	34	22.67	5.67	16	4	11.33	0.5		0.000126	0.000375	0.380023	1
424	Cpne5		0.342329	0.0647094	0.191516	SPIKE	18	0	9	0	12	3	0.5		0.000129	0.000381	0.387969	1
1105	Med7		0.342387	0.0647094	0.191516	SPIKE	20	0	8.75	0	10.5	5	0.75		0.000128	0.000381	0.387036	1
1850	St6galnac6		0.342479	0.0647094	0.191516	NSPIKE	24	22	10	22	10	16	0.5		0.000128	0.00038	0.385558	1
1191	Mxi1		0.342261	0.0654093	0.193085	SPIKE	27	18	4.5	16	4	9	0.5		0.000129	0.000381	0.38907	1
2212	Zfp51		0.342253	0.0654093	0.193085	SPIKE	19	15.83	5.15	20	6.5	4.75	0.75		0.000129	0.000381	0.389207	1
131	Ap3m2		0.341956	0.0657093	0.193365	SPIKE	32	16	2	12	1.5	8	0.25		0.000131	0.000386	0.394041	1
566	Eif4enif1		0.341802	0.0657593	0.193365	SPIKE	35	32.08	14.58	22	10	5.83	0.5		0.000132	0.000387	0.396568	1
1595	Rhobtb2		0.341851	0.0657593	0.193365	ACOS	35	0	0	0	0	35	0		0.000131	0.000387	0.395768	1
929	Jakmip3		0.341182	0.0674893	0.19789	SPIKE	35	2.92	20.42	2	14	11.67	0.5		0.000135	0.000397	0.406914	1
1416	Plcb1		0.340898	0.0675593	0.19789	NSPIKE	33	19.25	2.75	14	2	22	0.5		0.000137	0.0004	0.41174	1
1551	Rap1gds1		0.340975	0.0675593	0.19789	SPIKE	35	32.08	14.58	22	10	5.83	0.5		0.000136	0.0004	0.410418	1
116	Ankrd42		0.340601	0.0681893	0.198456	SPIKE	32	16	0	12	0	8	0.5		0.000138	0.000403	0.41684	1
604	Erf		0.340665	0.0681493	0.198456	SPIKE	18	10.5	1.5	14	2	4.5	0.5		0.000138	0.000403	0.415729	1
779	Gm5820		0.340845	0.0679493	0.198456	SPIKE	32	8	24	6	18	10.67	0.5		0.000137	0.000401	0.412631	1
954	Kdsr		0.340735	0.0679493	0.198456	SPIKE	27	0	11.81	0	10.5	6.75	0.75		0.000138	0.000402	0.414528	1
1173	Mterf3		0.340571	0.0681893	0.198456	SPIKE	23	3.83	15.33	4	16	7.67	0.5		0.000139	0.000403	0.417345	1
492	Dhrs4		0.340167	0.0689093	0.199369	SPIKE	25	18.75	4.69	18	4.5	6.25	0.75		0.000141	0.000408	0.424394	1
964	Kitl		0.340167	0.0689093	0.199369	SPIKE	18	4.5	12.38	6	16.5	4.5	0.75		0.000141	0.000408	0.424394	1
1029	Lrrc27		0.339683	0.0690293	0.199369	SPIKE	28	7	19.25	6	16.5	7	0.75		0.000144	0.000415	0.432967	1
1172	Mtbp		0.339683	0.0690293	0.199369	SPIKE	20	15	3.75	18	4.5	5	0.75		0.000144	0.000415	0.432967	1
1516	Ptprt		0.340167	0.0689093	0.199369	SPIKE	32	8	26	6	19.5	8	0.25		0.000141	0.000408	0.424394	1
1584	Rgmb		0.339956	0.0690093	0.199369	NSPIKE	20	15.42	6.67	18.5	8	15	0.25		0.000142	0.000411	0.428117	1
1549	Ralyl		0.33934	0.0697393	0.200909	NSPIKE	18	6.38	16.5	8.5	22	13.5	0.25		0.000146	0.00042	0.43915	1
1978	Tmem237		0.339452	0.0697393	0.200909	ACOS	18	9	9	12	12	18	0		0.000145	0.000418	0.437126	1
1089	Mast4		0.339199	0.0700493	0.201547	NSPIKE	29	21.75	7.25	18	6	19.33	0.5		0.000147	0.000422	0.441712	1
835	Hdac7		0.339007	0.0706593	0.203045	SPIKE	33	13.75	28.19	10	20.5	8.25	0.75		0.000148	0.000425	0.445223	1
969	Klhl32		0.338973	0.0717093	0.205802	SPIKE	20	10	0	12	0	6.67	0.5		0.000148	0.000425	0.445854	1
58	Adarb1		0.337171	0.0736293	0.206362	SPIKE	21	7	16.19	8	18.5	5.25	0.75		0.000159	0.000447	0.480168	1
273	Carmil2		0.338502	0.0723293	0.206362	NSPIKE	28	19.25	7	16.5	6	21	0.25		0.000151	0.000431	0.454597	1
309	Ccne2		0.3371	0.0736293	0.206362	SPIKE	19	0	8.31	0	10.5	4.75	0.75		0.00016	0.000448	0.481569	1
478	Ddx59		0.338048	0.0733493	0.206362	SPIKE	32	16	2	12	1.5	8	0.25		0.000154	0.000437	0.463167	1
830	H6pd		0.337171	0.0736293	0.206362	NSPIKE	32	14	0	10.5	0	24	0.25		0.000159	0.000447	0.480168	1
985	Ldlrad4		0.337835	0.0733893	0.206362	SPIKE	33	30.25	13.75	22	10	5.5	0.5		0.000155	0.00044	0.467246	1
1059	Lyz2		0.33747	0.0736093	0.206362	SPIKE	30	20	5	16	4	7.5	0.5		0.000157	0.000446	0.474305	1
1179	Mtif2		0.337183	0.0736293	0.206362	SPIKE	18	0	9	0	12	3	0.5		0.000159	0.000447	0.479922	1
1245	Nek6		0.337171	0.0736293	0.206362	NSPIKE	18	15	6	20	8	12	0.5		0.000159	0.000447	0.480168	1
1321	Pank1		0.338095	0.0733493	0.206362	SPIKE	20	5	13.75	6	16.5	5	0.75		0.000153	0.000436	0.462267	1
1442	Pnpla6		0.338335	0.0732793	0.206362	NSPIKE	21	12.69	3.5	14.5	4	15.75	0.25		0.000152	0.000433	0.457724	1
1522	Pus7		0.338095	0.0733493	0.206362	SPIKE	24	4	16	4	16	6	0.5		0.000153	0.000436	0.462267	1
1600	Rims1		0.337171	0.0736293	0.206362	NSPIKE	32	24	8	18	6	21.33	0.5		0.000159	0.000447	0.480168	1
1891	Tafa2		0.338397	0.0731893	0.206362	NSPIKE	28	14	0	12	0	18.67	0.5		0.000152	0.000433	0.456566	1
1966	Tmem125		0.338502	0.0723293	0.206362	NSPIKE	28	19.25	7	16.5	6	21	0.25		0.000151	0.000431	0.454597	1
2192	Zfp281		0.337333	0.0736293	0.206362	NSPIKE	32	19.33	5.33	14.5	4	24	0.25		0.000158	0.000447	0.476983	1
2216	Zfp524		0.33731	0.0736293	0.206362	ACOS	32	26.67	2.67	20	2	32	0.75		0.000158	0.000447	0.477441	1
2258	Zhx2		0.337665	0.0736093	0.206362	SPIKE	32	16	0	12	0	10.67	0.5		0.000156	0.000443	0.470518	1
2267	Znrf2		0.338783	0.0721793	0.206362	SPIKE	28	21	8.75	18	7.5	7	0.25		0.000149	0.000427	0.44935	1
1357	Pdlim2		0.336941	0.0738093	0.206611	SPIKE	34	19.83	2.83	14	2	8.5	0.5		0.000161	0.00045	0.484718	1
156	Arhgap33		0.336718	0.0762192	0.212052	SPIKE	32	5.33	21.33	4	16	5.33	0.5		0.000162	0.000453	0.489183	1
852	Hmgxb4		0.336718	0.0762192	0.212052	SPIKE	32	24	8	18	6	8	0.5		0.000162	0.000453	0.489183	1
1489	Prickle1		0.336654	0.0762192	0.212052	SPIKE	20	13.33	4.58	16	5.5	5	0.25		0.000163	0.000453	0.490455	1
1571	Rcsd1		0.336654	0.0762192	0.212052	SPIKE	29	26.58	12.08	22	10	4.83	0.5		0.000163	0.000453	0.490455	1
1907	Tbx1		0.336654	0.0762192	0.212052	SPIKE	29	26.58	12.08	22	10	4.83	0.5		0.000163	0.000453	0.490455	1
905	Invs		0.336286	0.0781492	0.215548	SPIKE	33	11	27.5	8	20	11	0.5		0.000165	0.000459	0.497902	1
1384	Phldb1		0.336068	0.0781492	0.215548	SPIKE	18	12	1.88	16	2.5	4.5	0.75		0.000167	0.000462	0.502367	1
1563	Rbks		0.335832	0.0781992	0.215548	SPIKE	18	12	1.88	16	2.5	4.5	0.75		0.000168	0.000466	0.507252	1
1805	Snx25		0.335247	0.0783292	0.215548	SPIKE	35	5.83	21.15	4	14.5	8.75	0.75		0.000172	0.000475	0.519537	1
1936	Tfe3		0.335639	0.0781992	0.215548	NSPIKE	19	11.08	1.58	14	2	12.67	0.5		0.00017	0.000468	0.511265	1
1955	Tle2		0.335639	0.0781992	0.215548	SPIKE	35	17.5	2.19	12	1.5	8.75	0.25		0.00017	0.000468	0.511265	1
2047	Ttc37		0.336068	0.0781492	0.215548	SPIKE	34	2.83	19.83	2	14	8.5	0.5		0.000167	0.000462	0.502367	1
2101	Usp6nl		0.335247	0.0783292	0.215548	SPIKE	19	1.58	12.27	2	15.5	4.75	0.25		0.000172	0.000475	0.519537	1
2263	Zmym4		0.335851	0.0781992	0.215548	SPIKE	18	9	16.88	12	22.5	4.5	0.75		0.000168	0.000466	0.506847	1
118	Ankrd6		0.334801	0.0793992	0.216656	SPIKE	31	28.42	12.92	22	10	7.75	0.5		0.000176	0.000481	0.529079	1
469	Dcaf11		0.33467	0.0793992	0.216656	NSPIKE	20	8.33	18.33	10	22	13.33	0.5		0.000177	0.000482	0.53191	1
638	Fam219a		0.334828	0.0793992	0.216656	NSPIKE	32	18	0	13.5	0	24	0.75		0.000175	0.000481	0.528499	1
762	Gm32856		0.334801	0.0793992	0.216656	SPIKE	22	11	0	12	0	7.33	0.5		0.000176	0.000481	0.529079	1
1192	Myadm		0.334664	0.0793992	0.216656	NSPIKE	20	16.25	5	19.5	6	15	0.75		0.000177	0.000482	0.532037	1
1758	Slc35d2		0.334607	0.0793992	0.216656	SPIKE	20	13.33	4.58	16	5.5	5	0.25		0.000177	0.000483	0.533282	1
2070	Uba1y		0.334664	0.0793992	0.216656	NSPIKE	20	16.25	5	19.5	6	15	0.75		0.000177	0.000482	0.532037	1
1580	Rev3l		0.33451	0.0803092	0.218876	SPIKE	18	1.5	11.62	2	15.5	4.5	0.25		0.000178	0.000484	0.535381	1
524	Dock9		0.333759	0.0823592	0.222973	ACOS	18	6	1.5	8	2	18	0.25		0.000183	0.000497	0.55201	1
628	Fam160b2		0.333615	0.0824992	0.222973	SPIKE	35	29.17	13.85	20	9.5	8.75	0.25		0.000184	0.000499	0.555255	1
769	Gm35624		0.334221	0.0822892	0.222973	SPIKE	28	14	0	12	0	9.33	0.5		0.00018	0.000489	0.541728	1
866	Hsf1		0.333542	0.0824992	0.222973	ACOS	32	16	13.33	12	10	32	0.08		0.000185	0.0005	0.556909	1
1209	Mzf1		0.333732	0.0823592	0.222973	SPIKE	32	0	16	0	12	5.33	0.5		0.000183	0.000497	0.552624	1
1669	Sclt1		0.333542	0.0824992	0.222973	ACOS	24	12	12	12	12	24	0		0.000185	0.0005	0.556909	1
1973	Tmem168		0.333732	0.0823592	0.222973	SPIKE	30	15	28.12	12	22.5	7.5	0.75		0.000183	0.000497	0.552624	1
1924	Tepp		0.333354	0.0827892	0.223226	SPIKE	32	16	0	12	0	10.67	0.5		0.000186	0.000501	0.561174	1
2115	Vldlr		0.333356	0.0827892	0.223226	SPIKE	24	12	0	12	0	8	0.5		0.000186	0.000501	0.561128	1
980	Lama5		0.333333	0.0835192	0.224504	SPIKE	24	6	16.5	6	16.5	6	0.75		0.000186	0.000501	0.561654	1
1078	Mapk10		0.33299	0.0835592	0.224504	SPIKE	18	12	1.88	16	2.5	4.5	0.75		0.000189	0.000508	0.569546	1
1368	Pex5		0.333333	0.0835192	0.224504	SPIKE	28	14	0	12	0	9.33	0.5		0.000186	0.000501	0.561654	1
1691	Septin11		0.332758	0.0840592	0.225156	SPIKE	32	0	16	0	12	10.67	0.5		0.000191	0.000511	0.574937	1
1721	Sh3kbp1		0.332691	0.0840992	0.225156	NSPIKE	24	14.5	4	14.5	4	18	0.25		0.000191	0.000512	0.576502	1
1949	Timm9		0.332943	0.0840392	0.225156	NSPIKE	22	13.29	3.67	14.5	4	16.5	0.25		0.000189	0.000508	0.570621	1
344	Cep295		0.332385	0.0848492	0.225967	SPIKE	25	4.17	15.1	4	14.5	6.25	0.75		0.000194	0.000517	0.583694	1
549	Ecsit		0.332261	0.0848992	0.225967	SPIKE	34	28.33	11.33	20	8	8.5	0.5		0.000195	0.000518	0.586645	1
2016	Trim32		0.332631	0.0848192	0.225967	SPIKE	18	16.5	7.5	22	10	6	0.5		0.000192	0.000512	0.577898	1
2177	Zfp131		0.332297	0.0848992	0.225967	NSPIKE	19	15.83	6.33	20	8	14.25	0.5		0.000194	0.000518	0.585791	1
2252	Zfp950		0.332631	0.0848192	0.225967	SPIKE	18	16.5	7.5	22	10	6	0.5		0.000192	0.000512	0.577898	1
85	Akap7		0.331106	0.0877191	0.229707	SPIKE	32	24	8	18	6	8	0.5		0.000204	0.000535	0.614713	1
170	Armc7		0.331899	0.0874991	0.229707	SPIKE	20	1.67	11.67	2	14	6.67	0.5		0.000198	0.000522	0.595304	1
280	Cast		0.331036	0.0877191	0.229707	NSPIKE	32	18.67	2.67	14	2	24	0.5		0.000205	0.000536	0.616439	1
449	Ctu2		0.3314	0.0876491	0.229707	SPIKE	32	8	24	6	18	10.67	0.5		0.000202	0.00053	0.60745	1
467	Daam2		0.3314	0.0876491	0.229707	SPIKE	18	12	3	16	4	4.5	0.5		0.000202	0.00053	0.60745	1
741	Gm20604		0.33197	0.0871691	0.229707	SPIKE	18	15	6	20	8	4.5	0.5		0.000197	0.000522	0.593592	1
838	Heatr5a		0.331944	0.0871691	0.229707	SPIKE	19	3.17	11.48	4	14.5	4.75	0.75		0.000197	0.000522	0.594227	1
839	Hectd4		0.331576	0.0876391	0.229707	ACOS	30	20	12.5	16	10	30	0.25		0.0002	0.000527	0.603137	1
1058	Lyz1		0.332002	0.0871691	0.229707	SPIKE	30	20	5	16	4	7.5	0.5		0.000197	0.000522	0.592819	1
1202	Myo5b		0.33197	0.0871691	0.229707	SPIKE	19	15.83	7.52	20	9.5	4.75	0.25		0.000197	0.000522	0.593592	1
1235	Ncoa7		0.331367	0.0876491	0.229707	NSPIKE	19	12.67	3.17	16	4	14.25	0.5		0.000202	0.00053	0.608258	1
1354	Pde4d		0.332002	0.0871691	0.229707	SPIKE	18	0	9	0	12	3	0.5		0.000197	0.000522	0.592819	1
1378	Phf14		0.331847	0.0874991	0.229707	NSPIKE	18	16.5	7.5	22	10	12	0.5		0.000198	0.000523	0.596562	1
2114	Vipas39		0.331758	0.0876391	0.229707	SPIKE	28	0	14	0	12	7	0.5		0.000199	0.000524	0.598711	1
1132	Mios		0.330895	0.0883291	0.230773	SPIKE	30	15	28.12	12	22.5	7.5	0.75		0.000206	0.000538	0.619966	1
1554	Rapgef6		0.330895	0.0883291	0.230773	SPIKE	28	0	14	0	12	7	0.5		0.000206	0.000538	0.619966	1
1109	Metap1d		0.330246	0.0895991	0.233019	SPIKE	22	20.17	10.54	22	11.5	5.5	0.25		0.000211	0.000549	0.63642	1
1138	Mllt10		0.330486	0.0893691	0.233019	SPIKE	33	30.25	13.75	22	10	5.5	0.5		0.000209	0.000546	0.630289	1
1280	Nsun6		0.330246	0.0895991	0.233019	SPIKE	29	12.08	26.58	10	22	9.67	0.5		0.000211	0.000549	0.63642	1
1963	Tmco6		0.330246	0.0895991	0.233019	SPIKE	35	2.92	20.42	2	14	11.67	0.5		0.000211	0.000549	0.63642	1
1126	Micu1		0.329967	0.0907091	0.235636	NSPIKE	32	8	24	6	18	21.33	0.5		0.000214	0.000555	0.643602	1
919	Itch		0.329631	0.0927291	0.239579	SPIKE	29	26.58	12.08	22	10	4.83	0.5		0.000217	0.000562	0.652369	1
960	Kif3a		0.329525	0.0927791	0.239579	ACOS	18	3	9	4	12	18	0.67		0.000217	0.000564	0.655155	1
1418	Plekha2		0.329219	0.0928591	0.239579	SPIKE	26	2.17	15.17	2	14	6.5	0.5		0.00022	0.000568	0.663257	1
1550	Rap1gap		0.329219	0.0928591	0.239579	SPIKE	23	3.83	16.77	4	17.5	5.75	0.25		0.00022	0.000568	0.663257	1
2012	Trappc8		0.32949	0.0927791	0.239579	NSPIKE	24	12.5	2	12.5	2	18	0.25		0.000218	0.000564	0.65608	1
2136	Wdr60		0.329219	0.0928591	0.239579	SPIKE	26	0	14.62	0	13.5	6.5	0.25		0.00022	0.000568	0.663257	1
34	Ablim1		0.329037	0.0934691	0.240405	SPIKE	35	26.25	10.94	18	7.5	8.75	0.25		0.000222	0.000571	0.668147	1
277	Casc1		0.328219	0.095099	0.240405	SPIKE	20	16.67	7.92	20	9.5	5	0.25		0.000229	0.000581	0.690428	1
286	Cbln2		0.328219	0.095099	0.240405	SPIKE	32	16	0	12	0	10.67	0.5		0.000229	0.000581	0.690428	1
574	Elp6		0.328219	0.095099	0.240405	SPIKE	20	16.67	7.92	20	9.5	5	0.25		0.000229	0.000581	0.690428	1
791	Gnptab		0.328102	0.095159	0.240405	ACOS	25	0	4.17	0	4	25	0.83		0.00023	0.000583	0.693676	1
799	Gpr162		0.327872	0.095189	0.240405	SPIKE	33	13.75	28.19	10	20.5	8.25	0.75		0.000232	0.000587	0.700115	1
864	Hsd3b7		0.327846	0.095189	0.240405	NSPIKE	24	13.5	0	13.5	0	18	0.75		0.000233	0.000587	0.700826	1
1028	Lrrc23		0.328219	0.095099	0.240405	SPIKE	24	8	21.5	8	21.5	6	0.25		0.000229	0.000581	0.690428	1
1203	Myo5c		0.328684	0.0948991	0.240405	SPIKE	30	22.5	7.5	18	6	5	0.5		0.000225	0.000578	0.677665	1
1264	Nol8		0.327945	0.095159	0.240405	SPIKE	32	8	24	6	18	8	0.5		0.000232	0.000586	0.698047	1
1336	Pbx3		0.328428	0.0949491	0.240405	NSPIKE	35	19.69	0	13.5	0	26.25	0.75		0.000227	0.000581	0.684665	1
1613	Rnf13		0.328537	0.0949491	0.240405	NSPIKE	20	3.33	13.33	4	16	15	0.5		0.000226	0.000579	0.681689	1
1725	Shroom3		0.328684	0.0948991	0.240405	SPIKE	20	18.33	7.08	22	8.5	5	0.75		0.000225	0.000578	0.677665	1
1803	Snx10		0.328528	0.0949491	0.240405	SPIKE	27	18	4.5	16	4	9	0.5		0.000226	0.000579	0.681939	1
1817	Sparcl1		0.328304	0.095069	0.240405	NSPIKE	19	16.23	7.92	20.5	10	14.25	0.25		0.000228	0.000581	0.688081	1
1831	Srbd1		0.328219	0.095099	0.240405	SPIKE	27	0	11.81	0	10.5	6.75	0.75		0.000229	0.000581	0.690428	1
1967	Tmem131l		0.328571	0.0949491	0.240405	SPIKE	24	4	16	4	16	6	0.5		0.000226	0.000579	0.680746	1
2148	Xpot		0.329011	0.0934691	0.240405	NSPIKE	28	19.25	7	16.5	6	21	0.25		0.000222	0.000571	0.668832	1
2226	Zfp641		0.328219	0.095099	0.240405	SPIKE	31	0	13.56	0	10.5	7.75	0.75		0.000229	0.000581	0.690428	1
972	Kmt2b		0.327522	0.097119	0.244465	SPIKE	21	19.25	8.75	22	10	7	0.5		0.000236	0.000593	0.70999	1
2053	Ttll1		0.327618	0.097119	0.244465	NSPIKE	20	16.25	5	19.5	6	15	0.75		0.000235	0.000592	0.707252	1
2116	Vps13d		0.327522	0.097119	0.244465	SPIKE	30	20	5	16	4	10	0.5		0.000236	0.000593	0.70999	1
1479	Ppp2r5b		0.327353	0.097529	0.245225	SPIKE	32	5.33	19.33	4	14.5	8	0.75		0.000237	0.000597	0.714797	1
565	Eif2d		0.32717	0.098199	0.246637	SPIKE	32	8	24	6	18	10.67	0.5		0.000239	0.0006	0.720062	1
87	Akip1		0.325641	0.101499	0.249782	SPIKE	27	18	4.5	16	4	9	0.5		0.000254	0.000628	0.765323	1
153	Arhgap24		0.326245	0.101009	0.249782	SPIKE	18	12	1.88	16	2.5	4.5	0.75		0.000248	0.000618	0.74713	1
258	Cacnb3		0.326479	0.100939	0.249782	NSPIKE	22	13.29	3.67	14.5	4	16.5	0.25		0.000246	0.000613	0.740209	1
386	Clcn7		0.325494	0.101539	0.249782	SPIKE	18	10.5	1.5	14	2	3	0.5		0.000256	0.000629	0.769842	1
611	Etl4		0.326957	0.099789	0.249782	SPIKE	18	13.5	5.62	18	7.5	4.5	0.25		0.000241	0.000604	0.72619	1
845	Hilpda		0.32569	0.101499	0.249782	SPIKE	18	15	4.88	20	6.5	4.5	0.75		0.000254	0.000628	0.763832	1
982	Lclat1		0.32569	0.101499	0.249782	SPIKE	30	2.5	17.5	2	14	7.5	0.5		0.000254	0.000628	0.763832	1
1016	Lpp		0.325494	0.101539	0.249782	SPIKE	18	10.5	1.5	14	2	3	0.5		0.000256	0.000629	0.769842	1
1293	Nxpe3		0.32569	0.101499	0.249782	SPIKE	18	16.5	7.5	22	10	6	0.5		0.000254	0.000628	0.763832	1
1663	Sap130		0.325662	0.101499	0.249782	NSPIKE	20	16.25	5	19.5	6	15	0.75		0.000254	0.000628	0.764703	1
1695	Serinc2		0.32569	0.101499	0.249782	SPIKE	21	19.25	8.75	22	10	7	0.5		0.000254	0.000628	0.763832	1
1712	Sgms1		0.326757	0.100789	0.249782	NSPIKE	35	20.42	2.92	14	2	23.33	0.5		0.000243	0.000607	0.732019	1
1853	Stambpl1		0.326732	0.100789	0.249782	SPIKE	32	5.33	19.33	4	14.5	8	0.75		0.000243	0.000607	0.73276	1
1857	Stk3		0.325572	0.101499	0.249782	NSPIKE	23	12.94	0	13.5	0	17.25	0.75		0.000255	0.000629	0.767433	1
1926	Tex10		0.327026	0.099789	0.249782	ACOS	20	8.33	5	10	6	20	0.17		0.00024	0.000603	0.724207	1
2091	Usp24		0.325788	0.101499	0.249782	SPIKE	20	18.33	8.33	22	10	6.67	0.5		0.000253	0.000628	0.760857	1
2178	Zfp14		0.32552	0.101539	0.249782	ACOS	35	5.83	32.08	4	22	35	0.25		0.000255	0.000629	0.769022	1
2230	Zfp687		0.325788	0.101499	0.249782	NSPIKE	35	20.42	2.92	14	2	23.33	0.5		0.000253	0.000628	0.760857	1
2254	Zfyve19		0.326758	0.100789	0.249782	NSPIKE	19	16.23	7.92	20.5	10	14.25	0.25		0.000243	0.000607	0.731993	1
1603	Ripk2		0.325321	0.103099	0.253345	SPIKE	18	15	7.12	20	9.5	4.5	0.25		0.000257	0.000632	0.775161	1
243	Brca2		0.323221	0.107079	0.258416	SPIKE	28	11.67	25.67	10	22	9.33	0.5		0.00028	0.000675	0.842475	1
321	Cdc42se2		0.323221	0.107079	0.258416	SPIKE	35	32.08	14.58	22	10	5.83	0.5		0.00028	0.000675	0.842475	1
390	Clk4		0.323273	0.107079	0.258416	SPIKE	21	14	3.5	16	4	7	0.5		0.000279	0.000675	0.840758	1
399	Cntfr		0.323477	0.107009	0.258416	NSPIKE	33	19.25	2.75	14	2	24.75	0.5		0.000277	0.000675	0.833988	1
479	Deaf1		0.323326	0.107079	0.258416	SPIKE	34	31.17	14.17	22	10	5.67	0.5		0.000278	0.000675	0.838972	1
583	Endog		0.323931	0.106979	0.258416	NSPIKE	27	11.81	0	10.5	0	20.25	0.25		0.000272	0.000666	0.819126	1
957	Kif20b		0.323221	0.107079	0.258416	SPIKE	19	7.92	16.23	10	20.5	4.75	0.75		0.00028	0.000675	0.842475	1
1054	Lypd6b		0.323221	0.107079	0.258416	SPIKE	19	9.5	1.19	12	1.5	4.75	0.25		0.00028	0.000675	0.842475	1
1077	Map7d1		0.323163	0.107209	0.258416	NSPIKE	34	20.54	5.67	14.5	4	25.5	0.25		0.00028	0.000676	0.844411	1
1183	Mtmr10		0.32381	0.106979	0.258416	SPIKE	32	0	16	0	12	5.33	0.5		0.000273	0.000667	0.82308	1
1265	Nol9		0.323221	0.107079	0.258416	SPIKE	28	11.67	25.67	10	22	9.33	0.5		0.00028	0.000675	0.842475	1
1279	Nsun5		0.324291	0.105809	0.258416	NSPIKE	22	13.29	3.67	14.5	4	16.5	0.25		0.000268	0.000657	0.807512	1
1344	Pcnx3		0.324856	0.105429	0.258416	NSPIKE	28	25.67	11.67	22	10	18.67	0.5		0.000262	0.000643	0.789619	1
1530	Qrich2		0.32381	0.106979	0.258416	SPIKE	30	15	28.12	12	22.5	7.5	0.75		0.000273	0.000667	0.82308	1
1977	Tmem229b		0.32381	0.106979	0.258416	SPIKE	20	0	8.75	0	10.5	5	0.75		0.000273	0.000667	0.82308	1
1996	Togaram1		0.323176	0.107209	0.258416	SPIKE	20	1.67	10.42	2	12.5	5	0.75		0.00028	0.000676	0.843986	1
2190	Zfp280c		0.323221	0.107079	0.258416	SPIKE	33	27.5	11	20	8	11	0.5		0.00028	0.000675	0.842475	1
2253	Zfp994		0.323221	0.107079	0.258416	SPIKE	19	3.17	11.48	4	14.5	4.75	0.75		0.00028	0.000675	0.842475	1
419	Cox18		0.322522	0.111849	0.265481	ACOS	26	23.83	2.17	22	2	26	0.83		0.000287	0.000688	0.866089	1
461	Cysltr1		0.322064	0.112009	0.265481	SPIKE	32	16	0	12	0	10.67	0.5		0.000293	0.000694	0.881852	1
557	Efna3		0.322118	0.112009	0.265481	SPIKE	24	16	2.5	16	2.5	6	0.75		0.000292	0.000694	0.880001	1
594	Epb41l2		0.322762	0.111069	0.265481	SPIKE	18	10.5	1.5	14	2	3	0.5		0.000285	0.000683	0.857899	1
701	Gal3st2c		0.322031	0.112009	0.265481	SPIKE	18	16.5	6.38	22	8.5	4.5	0.75		0.000293	0.000695	0.883029	1
811	Grhl1		0.322252	0.111959	0.265481	SPIKE	21	7	16.19	8	18.5	5.25	0.75		0.000291	0.000692	0.875363	1
1037	Lrrc71		0.32255	0.111849	0.265481	SPIKE	26	2.17	16.79	2	15.5	6.5	0.25		0.000287	0.000688	0.86513	1
1066	Mak		0.322252	0.111959	0.265481	SPIKE	22	5.5	15.12	6	16.5	5.5	0.75		0.000291	0.000692	0.875363	1
1096	Mcoln3		0.322416	0.111959	0.265481	SPIKE	23	3.83	15.33	4	16	3.83	0.5		0.000289	0.000689	0.869716	1
1360	Pdzk1ip1		0.322064	0.112009	0.265481	SPIKE	20	15	5	18	6	6.67	0.5		0.000293	0.000694	0.881852	1
1423	Plekhb1		0.322899	0.111069	0.265481	ACOS	22	20.17	0	22	0	22	0.92		0.000283	0.000682	0.853276	1
1844	St14		0.322762	0.111069	0.265481	SPIKE	32	16	0	12	0	8	0.5		0.000285	0.000683	0.857899	1
1896	Tatdn3		0.322416	0.111959	0.265481	SPIKE	19	15.83	5.15	20	6.5	4.75	0.75		0.000289	0.000689	0.869716	1
2003	Tpp2		0.322783	0.111069	0.265481	NSPIKE	20	3.33	13.33	4	16	15	0.5		0.000284	0.000683	0.85719	1
2015	Trim3		0.322073	0.112009	0.265481	SPIKE	33	30.25	13.75	22	10	5.5	0.5		0.000293	0.000694	0.881556	1
2102	Uspl1		0.322762	0.111069	0.265481	SPIKE	27	18	6.19	16	5.5	6.75	0.25		0.000285	0.000683	0.857899	1
42	Acsf3		0.321131	0.113419	0.265774	NSPIKE	21	16.19	7	18.5	8	15.75	0.25		0.000304	0.000712	0.914876	1
52	Adamts6		0.321135	0.113419	0.265774	SPIKE	34	14.17	29.04	10	20.5	8.5	0.75		0.000304	0.000712	0.914712	1
181	Ascc2		0.321135	0.113419	0.265774	SPIKE	19	1.58	12.27	2	15.5	4.75	0.25		0.000304	0.000712	0.914712	1
279	Casr		0.321135	0.113419	0.265774	SPIKE	18	15	4.88	20	6.5	4.5	0.75		0.000304	0.000712	0.914712	1
427	Cpt1c		0.321398	0.112829	0.265774	ACOS	33	11	5.5	8	4	33	0.17		0.0003	0.000711	0.905315	1
1082	Mapk4		0.321135	0.113419	0.265774	SPIKE	18	16.5	7.5	22	10	6	0.5		0.000304	0.000712	0.914712	1
1425	Plekhm2		0.321131	0.113419	0.265774	NSPIKE	21	20.56	8.75	23.5	10	15.75	0.75		0.000304	0.000712	0.914876	1
1650	Runx2		0.321135	0.113419	0.265774	SPIKE	33	22	3.44	16	2.5	8.25	0.75		0.000304	0.000712	0.914712	1
1706	Sfxn1		0.321131	0.113419	0.265774	NSPIKE	32	19.33	5.33	14.5	4	24	0.25		0.000304	0.000712	0.914876	1
1937	Tfpt		0.321131	0.113419	0.265774	NSPIKE	24	10	22	10	22	16	0.5		0.000304	0.000712	0.914876	1
2214	Zfp518a		0.321131	0.113419	0.265774	NSPIKE	27	11.81	0	10.5	0	20.25	0.25		0.000304	0.000712	0.914876	1
1807	Snx8		0.321081	0.114359	0.267426	NSPIKE	28	19.25	7	16.5	6	21	0.25		0.000304	0.000712	0.916682	1
2262	Zmym3		0.321066	0.114359	0.267426	NSPIKE	34	19.83	2.83	14	2	22.67	0.5		0.000304	0.000712	0.917216	1
391	Cln3		0.320763	0.117119	0.273387	SPIKE	20	8.33	17.08	10	20.5	5	0.75		0.000308	0.00072	0.928203	1
1547	Ralgapb		0.320509	0.117269	0.273387	SPIKE	30	20	6.88	16	5.5	7.5	0.25		0.000311	0.000726	0.937522	1
2150	Yipf6		0.320374	0.117269	0.273387	ACOS	35	14.58	11.67	10	8	35	0.08		0.000313	0.000729	0.942481	1
57	Adar		0.319631	0.118979	0.274348	NSPIKE	20	16.25	5	19.5	6	15	0.75		0.000322	0.000745	0.970343	1
294	Ccdc15		0.319481	0.118979	0.274348	SPIKE	20	8.33	17.08	10	20.5	5	0.75		0.000324	0.000748	0.976054	1
348	Cep57		0.31937	0.118979	0.274348	SPIKE	24	4	14.5	4	14.5	6	0.75		0.000325	0.000751	0.980319	1
661	Fign		0.319675	0.118979	0.274348	SPIKE	35	8.75	26.25	6	18	11.67	0.5		0.000321	0.000745	0.96866	1
970	Klhl42		0.319658	0.118979	0.274348	ACOS	31	5.17	28.42	4	22	31	0.25		0.000322	0.000745	0.969326	1
1184	Mtmr14		0.319882	0.118649	0.274348	SPIKE	24	22	8.5	22	8.5	6	0.75		0.000319	0.000742	0.960864	1
1490	Prkag2		0.319834	0.118749	0.274348	SPIKE	32	24	8	18	6	10.67	0.5		0.00032	0.000743	0.962658	1
1661	Samd11		0.319675	0.118979	0.274348	SPIKE	23	5.75	15.81	6	16.5	5.75	0.75		0.000322	0.000745	0.968682	1
1912	Tcte3		0.319882	0.118649	0.274348	SPIKE	20	13.33	4.58	16	5.5	5	0.25		0.000319	0.000742	0.960864	1
2210	Zfp467		0.319274	0.119009	0.274348	ACOS	28	0	0	0	0	28	0		0.000327	0.000753	0.984	1
2236	Zfp711		0.319723	0.118749	0.274348	SPIKE	19	14.25	4.75	18	6	6.33	0.5		0.000321	0.000745	0.966866	1
80	Aif1		0.319048	0.120919	0.276477	SPIKE	27	18	4.5	16	4	9	0.5		0.000329	0.000754	0.992755	1
645	Fat2		0.3188	0.121149	0.276477	SPIKE	27	18	4.5	16	4	9	0.5		0.000333	0.000759	1.00242	1
1123	Mib2		0.319149	0.120879	0.276477	ACOS	35	29.17	0	20	0	35	0.83		0.000328	0.000754	0.988826	1
1361	Peak1		0.319048	0.120919	0.276477	SPIKE	32	0	16	0	12	5.33	0.5		0.000329	0.000754	0.992755	1
1504	Prune1		0.319048	0.120919	0.276477	SPIKE	24	2	12.5	2	12.5	6	0.75		0.000329	0.000754	0.992755	1
1521	Pus10		0.319048	0.120919	0.276477	SPIKE	20	13.33	2.08	16	2.5	5	0.75		0.000329	0.000754	0.992755	1
2027	Trmt11		0.319048	0.120919	0.276477	SPIKE	28	21	8.75	18	7.5	7	0.25		0.000329	0.000754	0.992755	1
2157	Zbtb24		0.318822	0.121149	0.276477	SPIKE	33	27.5	11	20	8	11	0.5		0.000332	0.000759	1.00153	1
2181	Zfp185		0.318822	0.121149	0.276477	SPIKE	35	26.25	8.75	18	6	11.67	0.5		0.000332	0.000759	1.00153	1
2265	Zmynd10		0.319048	0.120919	0.276477	SPIKE	20	1.67	10.42	2	12.5	5	0.75		0.000329	0.000754	0.992755	1
502	Dlc1		0.318543	0.121619	0.276716	SPIKE	19	1.58	11.08	2	14	3.17	0.5		0.000336	0.000763	1.01254	1
1869	Stxbp5l		0.318561	0.121619	0.276716	ACOS	19	7.92	9.5	10	12	19	0.92		0.000336	0.000763	1.0118	1
2146	Xpa		0.318543	0.121619	0.276716	SPIKE	19	6.33	15.83	8	20	3.17	0.5		0.000336	0.000763	1.01254	1
289	Ccdc106		0.318372	0.123669	0.279979	SPIKE	22	3.67	14.67	4	16	3.67	0.5		0.000338	0.000766	1.0193	1
563	Eif1ad		0.318508	0.123669	0.279979	SPIKE	18	10.5	1.5	14	2	4.5	0.5		0.000337	0.000763	1.01393	1
895	Immp2l		0.318405	0.123669	0.279979	SPIKE	18	4.5	13.5	6	18	3	0.5		0.000338	0.000766	1.018	1
1465	Ppil3		0.318508	0.123669	0.279979	SPIKE	19	15.83	5.15	20	6.5	4.75	0.75		0.000337	0.000763	1.01393	1
1823	Spata7		0.318508	0.123669	0.279979	SPIKE	18	4.5	12.38	6	16.5	4.5	0.75		0.000337	0.000763	1.01393	1
324	Cdh23		0.317397	0.126139	0.281367	SPIKE	18	9	16.88	12	22.5	4.5	0.75		0.000351	0.000784	1.05878	1
428	Cr2		0.31743	0.126139	0.281367	SPIKE	29	12.08	24.77	10	20.5	7.25	0.75		0.000351	0.000784	1.05743	1
590	Entpd5		0.317397	0.126139	0.281367	SPIKE	24	22	10	22	10	8	0.5		0.000351	0.000784	1.0588	1
732	Gm12569		0.317397	0.126139	0.281367	SPIKE	18	4.5	13.5	6	18	6	0.5		0.000351	0.000784	1.05878	1
737	Gm13237		0.317397	0.126139	0.281367	SPIKE	24	22	10	22	10	8	0.5		0.000351	0.000784	1.0588	1
848	Hivep3		0.317735	0.126069	0.281367	SPIKE	24	6	16.5	6	16.5	6	0.75		0.000347	0.000782	1.04493	1
1117	Mfsd4b4		0.317397	0.126139	0.281367	SPIKE	31	0	13.56	0	10.5	7.75	0.75		0.000351	0.000784	1.0588	1
1377	Pheta1		0.317397	0.126139	0.281367	SPIKE	20	15	5	18	6	6.67	0.5		0.000351	0.000784	1.0588	1
1458	Pparg		0.31743	0.126139	0.281367	SPIKE	18	10.5	1.5	14	2	4.5	0.5		0.000351	0.000784	1.05743	1
1470	Ppox		0.317551	0.126069	0.281367	SPIKE	30	15	28.12	12	22.5	7.5	0.75		0.000349	0.000784	1.05246	1
1523	Pwwp3b		0.317915	0.124629	0.281367	SPIKE	27	18	4.5	16	4	9	0.5		0.000344	0.000779	1.03762	1
1601	Rin2		0.317397	0.126139	0.281367	SPIKE	32	16	0	12	0	10.67	0.5		0.000351	0.000784	1.0588	1
1852	Stambp		0.317735	0.126069	0.281367	SPIKE	24	0	12	0	12	4	0.5		0.000347	0.000782	1.04493	1
2017	Trim36		0.317397	0.126139	0.281367	SPIKE	30	5	20	4	16	7.5	0.5		0.000351	0.000784	1.0588	1
2077	Ugt8a		0.3179	0.124629	0.281367	ACOS	18	9	9	12	12	18	0		0.000345	0.000779	1.03827	1
96	Alpl		0.31658	0.128749	0.281478	SPIKE	21	19.25	8.75	22	10	7	0.5		0.000363	0.000796	1.09296	1
164	Arhgef3		0.31685	0.128749	0.281478	SPIKE	27	9	24.19	8	21.5	6.75	0.25		0.000359	0.000794	1.08156	1
420	Cp		0.316557	0.128789	0.281478	SPIKE	33	30.25	13.75	22	10	8.25	0.5		0.000363	0.000796	1.09394	1
528	Dpf1		0.316557	0.128789	0.281478	SPIKE	34	28.33	11.33	20	8	11.33	0.5		0.000363	0.000796	1.09394	1
622	Fam107a		0.31658	0.128749	0.281478	SPIKE	18	15	7.12	20	9.5	4.5	0.25		0.000363	0.000796	1.09296	1
632	Fam171b		0.31645	0.128789	0.281478	NSPIKE	20	0	10	0	12	13.33	0.5		0.000365	0.000798	1.09852	1
831	Hace1		0.31658	0.128749	0.281478	SPIKE	35	32.08	14.58	22	10	11.67	0.5		0.000363	0.000796	1.09296	1
877	Icmt		0.317159	0.128749	0.281478	SPIKE	20	13.33	2.08	16	2.5	5	0.75		0.000355	0.00079	1.06865	1
899	Inpp5d		0.316284	0.128789	0.281478	SPIKE	18	6	15	8	20	6	0.5		0.000367	0.000802	1.1056	1
1035	Lrrc56		0.316902	0.128749	0.281478	SPIKE	19	3.17	11.48	4	14.5	4.75	0.75		0.000358	0.000794	1.07937	1
1190	Muc6		0.31658	0.128749	0.281478	SPIKE	23	3.83	16.77	4	17.5	5.75	0.25		0.000363	0.000796	1.09296	1
1314	Pacsin3		0.31658	0.128749	0.281478	SPIKE	35	26.25	8.75	18	6	11.67	0.5		0.000363	0.000796	1.09296	1
1363	Peli3		0.31658	0.128749	0.281478	SPIKE	23	3.83	16.77	4	17.5	5.75	0.25		0.000363	0.000796	1.09296	1
1435	Plxnb1		0.316972	0.128749	0.281478	NSPIKE	20	3.33	13.33	4	16	15	0.5		0.000357	0.000792	1.07647	1
1466	Ppip5k1		0.317173	0.128749	0.281478	SPIKE	30	15	28.12	12	22.5	7.5	0.75		0.000354	0.00079	1.06806	1
1574	Recql4		0.316284	0.128789	0.281478	SPIKE	32	24	8	18	6	10.67	0.5		0.000367	0.000802	1.1056	1
1649	Rubcn		0.31658	0.128749	0.281478	SPIKE	18	16.5	7.5	22	10	6	0.5		0.000363	0.000796	1.09296	1
1702	Sfi1		0.316972	0.128749	0.281478	NSPIKE	20	18.75	10	22.5	12	15	0.25		0.000357	0.000792	1.07647	1
1847	St3gal6		0.31658	0.128749	0.281478	SPIKE	18	16.5	7.5	22	10	6	0.5		0.000363	0.000796	1.09296	1
1858	Stk33		0.317081	0.128749	0.281478	SPIKE	18	10.5	1.5	14	2	4.5	0.5		0.000356	0.000791	1.07189	1
1888	Taf12		0.317065	0.128749	0.281478	ACOS	35	14.58	11.67	10	8	35	0.08		0.000356	0.000791	1.07258	1
329	Cdkl3		0.315919	0.131049	0.285867	SPIKE	20	18.33	7.08	22	8.5	5	0.75		0.000372	0.000812	1.12135	1
697	Fxyd1		0.316116	0.131019	0.285867	ACOS	20	8.33	6.67	10	8	20	0.08		0.000369	0.000806	1.11285	1
392	Cluap1		0.315367	0.132529	0.288266	NSPIKE	26	10.83	23.83	10	22	17.33	0.5		0.00038	0.000827	1.14562	1
1045	Lrtm2		0.315367	0.132529	0.288266	NSPIKE	26	10.83	23.83	10	22	17.33	0.5		0.00038	0.000827	1.14562	1
1860	Stk40		0.315498	0.132429	0.288266	SPIKE	20	10	0	12	0	6.67	0.5		0.000378	0.000824	1.1398	1
39	Ache		0.315204	0.134329	0.29111	SPIKE	19	7.92	16.23	10	20.5	4.75	0.75		0.000383	0.000831	1.15287	1
395	Cmss1		0.315022	0.134329	0.29111	NSPIKE	33	11	27.5	8	20	22	0.5		0.000385	0.000837	1.161	1
496	Dido1		0.314719	0.134349	0.29111	SPIKE	34	31.17	14.17	22	10	5.67	0.5		0.00039	0.000846	1.17467	1
1935	Tfdp2		0.314671	0.134349	0.29111	SPIKE	20	15	3.75	18	4.5	5	0.75		0.000391	0.000846	1.17685	1
328	Cdkl2		0.314627	0.135589	0.292209	SPIKE	18	12	1.88	16	2.5	4.5	0.75		0.000391	0.000846	1.17888	1
430	Cradd		0.31427	0.136399	0.292209	SPIKE	18	13.5	4.5	18	6	3	0.5		0.000397	0.000851	1.19524	1
655	Fer		0.3146	0.135589	0.292209	SPIKE	19	15.83	5.15	20	6.5	4.75	0.75		0.000392	0.000846	1.18011	1
992	Lhfpl2		0.314286	0.135889	0.292209	SPIKE	20	10	1.25	12	1.5	5	0.25		0.000396	0.000851	1.1945	1
1006	Lmtk3		0.314089	0.136399	0.292209	SPIKE	18	0	9	0	12	3	0.5		0.000399	0.000856	1.20362	1
1232	Nckap5		0.314286	0.135889	0.292209	SPIKE	30	15	28.12	12	22.5	7.5	0.75		0.000396	0.000851	1.1945	1
1555	Rarb		0.31427	0.136399	0.292209	SPIKE	32	16	0	12	0	8	0.5		0.000397	0.000851	1.19524	1
1566	Rbm47		0.314286	0.135889	0.292209	SPIKE	27	18	4.5	16	4	9	0.5		0.000396	0.000851	1.1945	1
1901	Tbc1d9b		0.314285	0.135889	0.292209	SPIKE	21	7	17.5	8	20	3.5	0.5		0.000396	0.000851	1.19453	1
1910	Tcof1		0.314286	0.135889	0.292209	SPIKE	30	15	28.12	12	22.5	7.5	0.75		0.000396	0.000851	1.1945	1
2028	Trmt2a		0.31427	0.136399	0.292209	SPIKE	24	10	23.5	10	23.5	6	0.25		0.000397	0.000851	1.19524	1
2065	Tyk2		0.3146	0.135589	0.292209	SPIKE	19	15.83	5.15	20	6.5	4.75	0.75		0.000392	0.000846	1.18011	1
379	Clasrp		0.313531	0.138639	0.295893	ACOS	27	13.5	2.25	12	2	27	0.42		0.000408	0.000872	1.22975	1
580	Eml5		0.313609	0.138639	0.295893	NSPIKE	21	12.25	1.75	14	2	14	0.5		0.000407	0.00087	1.22607	1
1342	Pclo		0.313609	0.138639	0.295893	SPIKE	20	16.67	7.92	20	9.5	5	0.25		0.000407	0.00087	1.22607	1
2112	Vegfb		0.313516	0.138639	0.295893	SPIKE	23	7.67	17.73	8	18.5	5.75	0.75		0.000408	0.000872	1.23046	1
962	Kirrel3		0.313399	0.140199	0.298381	SPIKE	26	2.17	15.17	2	14	6.5	0.5		0.00041	0.000873	1.23602	1
1483	Pradc1		0.313392	0.140199	0.298381	NSPIKE	35	8.75	26.25	6	18	23.33	0.5		0.00041	0.000873	1.23639	1
2074	Ubp1		0.313392	0.140199	0.298381	NSPIKE	21	12.25	1.75	14	2	15.75	0.5		0.00041	0.000873	1.23639	1
37	Acaca		0.311721	0.142709	0.298415	ACOS	18	13.5	12	18	16	18	0.08		0.000438	0.000915	1.31833	1
111	Ankrd24		0.312729	0.142579	0.298415	SPIKE	32	8	24	6	18	10.67	0.5		0.000421	0.000889	1.26829	1
120	Anks1b		0.312601	0.142579	0.298415	SPIKE	18	1.5	11.62	2	15.5	4.5	0.25		0.000423	0.000891	1.27453	1
126	Ano6		0.312729	0.142579	0.298415	SPIKE	24	22	10	22	10	8	0.5		0.000421	0.000889	1.26829	1
233	Bin3		0.312601	0.142579	0.298415	SPIKE	35	32.08	12.4	22	8.5	8.75	0.75		0.000423	0.000891	1.27453	1
585	Enkd1		0.312729	0.142579	0.298415	SPIKE	19	0	8.31	0	10.5	4.75	0.75		0.000421	0.000889	1.26829	1
885	Igsf9		0.31283	0.141759	0.298415	SPIKE	35	0	19.69	0	13.5	8.75	0.25		0.000419	0.000888	1.2634	1
911	Irf3		0.31174	0.142709	0.298415	SPIKE	35	2.92	20.42	2	14	11.67	0.5		0.000437	0.000915	1.31737	1
997	Limk2		0.312025	0.142589	0.298415	SPIKE	26	6.5	19.5	6	18	6.5	0.5		0.000432	0.000907	1.30304	1
1229	Nbr1		0.312464	0.142579	0.298415	NSPIKE	20	15.42	6.67	18.5	8	15	0.25		0.000425	0.000895	1.28127	1
1640	Rreb1		0.3132	0.141659	0.298415	SPIKE	28	21	8.75	18	7.5	7	0.25		0.000413	0.000879	1.24555	1
1670	Scly		0.312025	0.142589	0.298415	SPIKE	35	26.25	8.75	18	6	11.67	0.5		0.000432	0.000907	1.30304	1
1696	Serpinb1a		0.31283	0.141759	0.298415	SPIKE	18	16.5	6.38	22	8.5	4.5	0.75		0.000419	0.000888	1.2634	1
1793	Smpdl3b		0.312601	0.142579	0.298415	SPIKE	32	8	22	6	16.5	8	0.75		0.000423	0.000891	1.27453	1
1800	Snip1		0.31283	0.141759	0.298415	SPIKE	19	15.83	7.52	20	9.5	4.75	0.25		0.000419	0.000888	1.2634	1
2026	Trmt10b		0.31283	0.141759	0.298415	SPIKE	30	2.5	17.5	2	14	5	0.5		0.000419	0.000888	1.2634	1
2038	Tspan12		0.312169	0.142579	0.298415	ACOS	18	15	10.5	20	14	18	0.25		0.00043	0.000904	1.29585	1
2117	Vps37a		0.311826	0.142709	0.298415	SPIKE	18	13.5	5.62	18	7.5	4.5	0.25		0.000436	0.000913	1.31305	1
2256	Zfyve26		0.312357	0.142579	0.298415	ACOS	32	5.33	2.67	4	2	32	0.08		0.000427	0.000898	1.28657	1
673	Fmo9		0.311574	0.144659	0.301937	SPIKE	18	4.5	13.5	6	18	6	0.5		0.00044	0.000918	1.32579	1
1472	Ppp1r13l		0.311574	0.144659	0.301937	SPIKE	34	14.17	29.04	10	20.5	8.5	0.75		0.00044	0.000918	1.32579	1
1991	Tnr		0.311509	0.146139	0.304746	NSPIKE	20	11.67	1.67	14	2	15	0.5		0.000441	0.00092	1.32909	1
2004	Tprkb		0.3114	0.147299	0.306883	SPIKE	32	16	0	12	0	10.67	0.5		0.000443	0.000923	1.33465	1
31	Abi2		0.310259	0.149849	0.307755	SPIKE	20	18.33	7.08	22	8.5	5	0.75		0.000463	0.000953	1.39415	1
105	Ank2		0.311286	0.148669	0.307755	SPIKE	28	21	8.75	18	7.5	7	0.25		0.000445	0.000926	1.34045	1
130	Ap3b1		0.310143	0.149978	0.307755	NSPIKE	29	9.67	24.17	8	20	19.33	0.5		0.000465	0.000956	1.40029	1
823	Grm8		0.311046	0.148949	0.307755	SPIKE	19	7.92	16.23	10	20.5	4.75	0.75		0.000449	0.000933	1.35282	1
833	Hbs1l		0.311046	0.148949	0.307755	SPIKE	31	7.75	23.25	6	18	10.33	0.5		0.000449	0.000933	1.35282	1
1302	Osbpl1a		0.310692	0.149849	0.307755	SPIKE	35	26.25	10.94	18	7.5	8.75	0.25		0.000455	0.000939	1.37129	1
1519	Pts		0.310881	0.148949	0.307755	SPIKE	18	12	1.88	16	2.5	4.5	0.75		0.000452	0.000936	1.36139	1
1606	Rlf		0.309965	0.150018	0.307755	SPIKE	32	8	24	6	18	8	0.5		0.000468	0.00096	1.40984	1
1773	Slc6a5		0.309965	0.150018	0.307755	SPIKE	30	20	5	16	4	7.5	0.5		0.000468	0.00096	1.40984	1
1810	Sorbs1		0.310694	0.149849	0.307755	SPIKE	26	4.33	17.33	4	16	6.5	0.5		0.000455	0.000939	1.37116	1
1820	Spata2		0.310286	0.149849	0.307755	ACOS	34	28.33	0	20	0	34	0.83		0.000462	0.000953	1.39271	1
1920	Tenm2		0.310881	0.148949	0.307755	SPIKE	25	10.42	21.35	10	20.5	6.25	0.75		0.000452	0.000936	1.36139	1
1961	Tmcc1		0.310692	0.149849	0.307755	SPIKE	34	14.17	33.29	10	23.5	8.5	0.25		0.000455	0.000939	1.37129	1
1995	Tnxb		0.310771	0.149849	0.307755	SPIKE	28	7	19.25	6	16.5	7	0.75		0.000454	0.000939	1.36714	1
2001	Tor1aip2		0.310692	0.149849	0.307755	SPIKE	34	17	2.12	12	1.5	8.5	0.25		0.000455	0.000939	1.37129	1
2029	Trmt2b		0.309965	0.150018	0.307755	SPIKE	24	12	0	12	0	8	0.5		0.000468	0.00096	1.40984	1
2040	Tspan4		0.310918	0.148949	0.307755	SPIKE	18	13.5	4.5	18	6	3	0.5		0.000451	0.000936	1.35949	1
1886	Tacc1		0.309699	0.150678	0.308552	SPIKE	20	18.33	8.33	22	10	6.67	0.5		0.000473	0.000969	1.42422	1
2271	Zscan22		0.309681	0.150678	0.308552	NSPIKE	20	16.25	5	19.5	6	15	0.75		0.000473	0.000969	1.42522	1
593	Epb41l1		0.309557	0.151988	0.310954	SPIKE	18	12	3	16	4	4.5	0.5		0.000475	0.000972	1.43196	1
319	Cdc25a		0.308625	0.155188	0.316362	SPIKE	32	0	16	0	12	5.33	0.5		0.000492	0.00100379	1.4836	1
907	Iqce		0.308658	0.155188	0.316362	SPIKE	21	1.75	12.25	2	14	3.5	0.5		0.000492	0.00100346	1.48178	1
1548	Ralgps1		0.30929	0.155188	0.316362	NSPIKE	20	16.25	5	19.5	6	15	0.75		0.00048	0.000981	1.44658	1
1921	Tenm4		0.308767	0.155188	0.316362	SPIKE	31	28.42	12.92	22	10	7.75	0.5		0.00049	0.00100018	1.47562	1
195	Atg2a		0.307702	0.158348	0.319934	SPIKE	32	16	0	12	0	8	0.5		0.00051	0.00103033	1.53648	1
480	Dedd2		0.308301	0.158288	0.319934	NSPIKE	20	0	10	0	12	13.33	0.5		0.000499	0.00101445	1.50199	1
553	Eef2k		0.308276	0.158348	0.319934	SPIKE	21	19.25	8.75	22	10	7	0.5		0.000499	0.00101445	1.50341	1
1106	Megf11		0.308229	0.158348	0.319934	SPIKE	32	8	22	6	16.5	8	0.75		0.0005	0.00101445	1.50608	1
1160	Mpp7		0.308229	0.158348	0.319934	SPIKE	18	10.5	1.5	14	2	4.5	0.5		0.0005	0.00101445	1.50608	1
1373	Pggt1b		0.307729	0.158348	0.319934	SPIKE	32	16	0	12	0	8	0.5		0.000509	0.00103033	1.53494	1
1726	Sigirr		0.307763	0.158348	0.319934	ACOS	33	16.5	22	12	16	33	0.83		0.000509	0.00103033	1.53295	1
1829	Spindoc		0.307702	0.158348	0.319934	SPIKE	32	16	0	12	0	8	0.5		0.00051	0.00103033	1.53648	1
2193	Zfp286		0.308229	0.158348	0.319934	SPIKE	34	28.33	9.21	20	6.5	8.5	0.75		0.0005	0.00101445	1.50608	1
2264	Zmym6		0.308074	0.158348	0.319934	NSPIKE	28	19.25	7	16.5	6	21	0.25		0.000503	0.00101953	1.51498	1
40	Acnat1		0.307212	0.160918	0.320849	SPIKE	22	20.17	9.17	22	10	5.5	0.5		0.00052	0.00103583	1.56528	1
49	Adal		0.307212	0.160918	0.320849	SPIKE	32	24	10	18	7.5	8	0.25		0.00052	0.00103583	1.56528	1
165	Arhgef6		0.307212	0.160918	0.320849	SPIKE	35	32.08	12.4	22	8.5	8.75	0.75		0.00052	0.00103583	1.56528	1
397	Cmtr2		0.307212	0.160918	0.320849	SPIKE	19	7.92	17.42	10	22	4.75	0.5		0.00052	0.00103583	1.56528	1
404	Cntnap1		0.30747	0.159978	0.320849	SPIKE	33	22	3.44	16	2.5	8.25	0.75		0.000514	0.00103392	1.55006	1
644	Fastkd5		0.307212	0.160918	0.320849	SPIKE	30	20	3.12	16	2.5	7.5	0.75		0.00052	0.00103583	1.56528	1
755	Gm32208		0.30747	0.159978	0.320849	SPIKE	19	9.5	0	12	0	6.33	0.5		0.000514	0.00103392	1.55006	1
1188	Mtss2		0.307374	0.160918	0.320849	NSPIKE	25	15.1	4.17	14.5	4	18.75	0.25		0.000516	0.0010351	1.55569	1
1208	Myt1l		0.30737	0.160918	0.320849	SPIKE	28	0	14	0	12	7	0.5		0.000516	0.0010351	1.55594	1
1389	Pigo		0.30747	0.159978	0.320849	SPIKE	19	7.92	17.42	10	22	6.33	0.5		0.000514	0.00103392	1.55006	1
1664	Sash1		0.307374	0.160918	0.320849	NSPIKE	32	12.67	26.67	9.5	20	24	0.75		0.000516	0.0010351	1.55569	1
1687	Sema6d		0.307259	0.160918	0.320849	NSPIKE	24	13.5	0	13.5	0	18	0.75		0.000519	0.00103583	1.56252	1
1778	Slc8a2		0.30747	0.159978	0.320849	SPIKE	26	2.17	15.17	2	14	6.5	0.5		0.000514	0.00103392	1.55006	1
1809	Socs6		0.307589	0.159938	0.320849	ACOS	28	7	25.67	6	22	28	0.33		0.000512	0.00103385	1.54311	1
2200	Zfp37		0.30747	0.159978	0.320849	SPIKE	27	4.5	19.69	4	17.5	6.75	0.25		0.000514	0.00103392	1.55006	1
4	1700012B09Rik		0.306783	0.163588	0.322389	SPIKE	23	5.75	15.81	6	16.5	5.75	0.75		0.000528	0.00104482	1.59084	1
46	Actr6		0.306224	0.163818	0.322389	NSPIKE	18	15.38	7.5	20.5	10	13.5	0.25		0.000539	0.00106127	1.62483	1
91	Aldh3a2		0.306224	0.163818	0.322389	NSPIKE	18	16.5	7.5	22	10	13.5	0.5		0.000539	0.00106127	1.62483	1
182	Ash2l		0.30706	0.162938	0.322389	SPIKE	30	20	5	16	4	10	0.5		0.000522	0.00103723	1.57427	1
218	Bbof1		0.307032	0.162938	0.322389	NSPIKE	28	14	0	12	0	18.67	0.5		0.000523	0.00103745	1.57598	1
439	Csf2ra		0.306224	0.163818	0.322389	NSPIKE	18	2.62	10.5	3.5	14	13.5	0.75		0.000539	0.00106127	1.62483	1
507	Dmtf1		0.306338	0.163818	0.322389	SPIKE	22	5.5	16.5	6	18	3.67	0.5		0.000537	0.00106037	1.61783	1
727	Glmn		0.307135	0.162938	0.322389	SPIKE	34	28.33	11.33	20	8	8.5	0.5		0.000521	0.00103723	1.56981	1
805	Gpx6		0.30706	0.162938	0.322389	SPIKE	35	29.17	11.67	20	8	11.67	0.5		0.000522	0.00103723	1.57427	1
841	Herc2		0.306597	0.163818	0.322389	SPIKE	35	5.83	23.33	4	16	8.75	0.5		0.000532	0.00105099	1.60212	1
904	Ints2		0.306878	0.163428	0.322389	ACOS	33	13.75	11	10	8	33	0.08		0.000526	0.00104258	1.58515	1
1387	Pigc		0.30706	0.162938	0.322389	SPIKE	23	5.75	18.69	6	19.5	5.75	0.25		0.000522	0.00103723	1.57427	1
1529	Pym1		0.306775	0.163588	0.322389	SPIKE	20	10	0	12	0	6.67	0.5		0.000528	0.00104482	1.59133	1
1962	Tmco3		0.306284	0.163818	0.322389	SPIKE	20	0	8.75	0	10.5	5	0.75		0.000538	0.00106127	1.62111	1
1993	Tns2		0.30706	0.162938	0.322389	SPIKE	23	5.75	18.69	6	19.5	5.75	0.25		0.000522	0.00103723	1.57427	1
1728	Sipa1l1		0.306062	0.164848	0.324135	SPIKE	20	15	5	18	6	6.67	0.5		0.000543	0.00106685	1.63478	1
1131	Mindy3		0.305415	0.166768	0.327344	SPIKE	28	0	14	0	12	7	0.5		0.000556	0.00109127	1.6751	1
2048	Ttc39a		0.305441	0.166768	0.327344	SPIKE	28	21	8.75	18	7.5	7	0.25		0.000555	0.00109114	1.67345	1
2050	Ttc7b		0.30539	0.167528	0.328552	SPIKE	21	10.5	19.69	12	22.5	5.25	0.75		0.000556	0.00109135	1.67667	1
190	Atad2b		0.305083	0.169448	0.33146	SPIKE	32	5.33	21.33	4	16	5.33	0.5		0.000563	0.00110119	1.69617	1
606	Esco1		0.305253	0.169438	0.33146	ACOS	28	7	4.67	6	4	28	0.08		0.000559	0.00109591	1.68535	1
2057	Ttll7		0.305234	0.169448	0.33146	NSPIKE	20	11.25	0	13.5	0	15	0.75		0.00056	0.00109591	1.68657	1
100	Amotl1		0.304812	0.171668	0.332937	SPIKE	19	1.58	12.27	2	15.5	4.75	0.25		0.000569	0.0011115	1.71352	1
199	Atp11c		0.304604	0.171668	0.332937	NSPIKE	32	19.33	5.33	14.5	4	24	0.25		0.000573	0.00111354	1.72699	1
402	Cntn5		0.304762	0.171668	0.332937	SPIKE	27	18	4.5	16	4	9	0.5		0.00057	0.0011117	1.71677	1
676	Fnbp1		0.304762	0.171668	0.332937	SPIKE	24	6	16.5	6	16.5	6	0.75		0.00057	0.0011117	1.71677	1
686	Fras1		0.304604	0.171668	0.332937	NSPIKE	32	8	24	6	18	21.33	0.5		0.000573	0.00111354	1.72699	1
794	Golga7b		0.304664	0.171668	0.332937	SPIKE	34	28.33	11.33	20	8	8.5	0.5		0.000572	0.00111354	1.72312	1
1076	Map6		0.304563	0.171668	0.332937	NSPIKE	26	19.5	6.5	18	6	19.5	0.5		0.000574	0.00111432	1.72968	1
1593	Rhno1		0.304422	0.171668	0.332937	SPIKE	20	0	8.75	0	10.5	5	0.75		0.000577	0.00111925	1.73883	1
2172	Zeb2		0.304629	0.171668	0.332937	SPIKE	35	5.83	23.33	4	16	8.75	0.5		0.000573	0.00111354	1.72538	1
2266	Znrf1		0.304664	0.171668	0.332937	SPIKE	18	4.5	12.38	6	16.5	4.5	0.75		0.000572	0.00111354	1.72312	1
1440	Pms2		0.303958	0.172488	0.334242	ACOS	24	12	8	12	8	24	0.17		0.000587	0.00113793	1.76935	1
342	Cep19		0.303629	0.175288	0.338801	SPIKE	18	4.5	12.38	6	16.5	4.5	0.75		0.000595	0.00114912	1.79132	1
1019	Lrch3		0.303629	0.175288	0.338801	SPIKE	18	13.5	5.62	18	7.5	4.5	0.25		0.000595	0.00114912	1.79132	1
1722	Shank2		0.303753	0.175128	0.338801	SPIKE	19	11.08	1.58	14	2	4.75	0.5		0.000592	0.00114574	1.78302	1
51	Adam22		0.303148	0.176278	0.339772	SPIKE	34	28.33	11.33	20	8	11.33	0.5		0.000605	0.00116701	1.82385	1
546	E430024I08Rik		0.303071	0.176388	0.339772	ACOS	24	6	4	6	4	24	0.08		0.000607	0.00116939	1.82912	1
2092	Usp25		0.303221	0.176278	0.339772	SPIKE	19	9.5	1.19	12	1.5	4.75	0.25		0.000604	0.00116484	1.81891	1
2096	Usp40		0.303394	0.176168	0.339772	SPIKE	32	8	24	6	18	10.67	0.5		0.0006	0.00115829	1.80714	1
241	Bpifb1		0.302585	0.178928	0.342921	SPIKE	30	20	5	16	4	7.5	0.5		0.000618	0.00118479	1.86263	1
916	Isg20		0.302585	0.178928	0.342921	SPIKE	18	4.5	13.5	6	18	3	0.5		0.000618	0.00118479	1.86263	1
971	Klhl8		0.302585	0.178928	0.342921	SPIKE	24	12	0	12	0	8	0.5		0.000618	0.00118479	1.86263	1
1834	Srd5a1		0.302585	0.178928	0.342921	SPIKE	32	8	24	6	18	8	0.5		0.000618	0.00118479	1.86263	1
2061	Tube1		0.302585	0.178928	0.342921	SPIKE	32	8	24	6	18	8	0.5		0.000618	0.00118479	1.86263	1
2171	Zdhhc9		0.302585	0.178928	0.342921	SPIKE	32	8	24	6	18	8	0.5		0.000618	0.00118479	1.86263	1
33	Abl1		0.302407	0.179598	0.343048	SPIKE	27	18	4.5	16	4	9	0.5		0.000622	0.00118867	1.87503	1
725	Glb1l2		0.30244	0.179448	0.343048	SPIKE	28	4.67	16.92	4	14.5	7	0.75		0.000622	0.00118831	1.87274	1
1641	Rrnad1		0.302525	0.179448	0.343048	SPIKE	18	13.5	4.5	18	6	3	0.5		0.00062	0.00118645	1.86681	1
2093	Usp28		0.302438	0.179448	0.343048	SPIKE	30	20	5	16	4	10	0.5		0.000622	0.00118831	1.87289	1
148	Arfgap3		0.301952	0.181548	0.345321	SPIKE	28	0	14	0	12	7	0.5		0.000633	0.00120477	1.90716	1
534	Dtnb		0.301902	0.181548	0.345321	SPIKE	30	20	3.12	16	2.5	7.5	0.75		0.000634	0.00120477	1.91072	1
1867	Stx3		0.302077	0.181548	0.345321	ACOS	32	29.33	10.67	22	8	32	0.58		0.00063	0.00120241	1.8983	1
1897	Tbc1d14		0.301902	0.181548	0.345321	SPIKE	33	30.25	15.81	22	11.5	8.25	0.25		0.000634	0.00120477	1.91072	1
1928	Tex30		0.301957	0.181548	0.345321	NSPIKE	28	19.25	7	16.5	6	21	0.25		0.000633	0.00120477	1.90677	1
20	A730060N03Rik		0.301822	0.183128	0.346298	SPIKE	32	21.33	7.33	16	5.5	8	0.25		0.000636	0.00120477	1.9164	1
132	Ap4m1		0.301841	0.183128	0.346298	ACOS	32	2.67	8	2	6	32	0.83		0.000636	0.00120477	1.91507	1
284	Cbfa2t2		0.301622	0.183128	0.346298	SPIKE	30	20	5	16	4	7.5	0.5		0.000641	0.00121179	1.93078	1
396	Cmtm3		0.301822	0.183128	0.346298	SPIKE	34	28.33	11.33	20	8	8.5	0.5		0.000636	0.00120477	1.9164	1
482	Dennd1b		0.301822	0.183128	0.346298	SPIKE	32	8	26	6	19.5	8	0.25		0.000636	0.00120477	1.9164	1
908	Iqck		0.301628	0.183128	0.346298	SPIKE	18	15	7.12	20	9.5	4.5	0.25		0.000641	0.00121179	1.93028	1
1558	Rasgef1c		0.301822	0.183128	0.346298	SPIKE	32	8	22	6	16.5	8	0.75		0.000636	0.00120477	1.9164	1
504	Dlgap1		0.301411	0.185068	0.349385	ACOS	18	10.5	7.5	14	10	18	0.17		0.000646	0.00121929	1.94595	1
1091	Mboat2		0.301411	0.185068	0.349385	ACOS	18	1.5	0	2	0	18	0.08		0.000646	0.00121929	1.94595	1
2240	Zfp787		0.300768	0.185758	0.350397	SPIKE	18	15	7.12	20	9.5	4.5	0.25		0.000661	0.00124778	1.99309	1
333	Celsr1		0.3	0.188888	0.355416	SPIKE	24	6	16.5	6	16.5	6	0.75		0.000681	0.00128065	2.05068	1
488	Dgke		0.3	0.188888	0.355416	SPIKE	30	15	28.12	12	22.5	7.5	0.75		0.000681	0.00128065	2.05068	1
2126	Washc4		0.300232	0.188888	0.355416	SPIKE	24	14	0.5	14	0.5	6	0.75		0.000675	0.0012718	2.03313	1
110	Ankrd13c		0.299799	0.190238	0.356481	SPIKE	30	20	3.12	16	2.5	7.5	0.75		0.000686	0.00128705	2.06604	1
1088	Mast3		0.299622	0.190238	0.356481	SPIKE	18	4.5	13.5	6	18	3	0.5		0.00069	0.00129336	2.07961	1
1118	Mgam		0.299945	0.190238	0.356481	SPIKE	24	10	20.5	10	20.5	6	0.75		0.000682	0.00128113	2.05484	1
1408	Pkib		0.299644	0.190238	0.356481	SPIKE	18	15	6	20	8	4.5	0.5		0.00069	0.00129335	2.07787	1
2183	Zfp212		0.299945	0.190238	0.356481	SPIKE	27	18	4.5	16	4	9	0.5		0.000682	0.00128113	2.05484	1
1399	Pip5k1c		0.299373	0.191868	0.359205	NSPIKE	22	20.62	11	22.5	12	16.5	0.25		0.000697	0.00130425	2.09884	1
1770	Slc4a2		0.299138	0.192008	0.359205	SPIKE	27	18	4.5	16	4	9	0.5		0.000703	0.00131454	2.11714	1
75	Agfg1		0.298556	0.195308	0.360337	NSPIKE	25	14.58	2.08	14	2	20.83	0.5		0.000718	0.00133652	2.16318	1
90	Aldh3a1		0.298425	0.195308	0.360337	SPIKE	18	4.5	12.38	6	16.5	4.5	0.75		0.000721	0.00133748	2.17371	1
541	Dxo		0.298967	0.195038	0.360337	SPIKE	19	15.83	7.52	20	9.5	4.75	0.25		0.000707	0.00131746	2.13058	1
576	Emilin2		0.299028	0.195038	0.360337	SPIKE	18	13.5	5.62	18	7.5	4.5	0.25		0.000706	0.00131746	2.12577	1
658	Fgf13		0.298967	0.195038	0.360337	SPIKE	35	0	15.31	0	10.5	8.75	0.75		0.000707	0.00131746	2.13058	1
735	Gm13167		0.29836	0.195308	0.360337	SPIKE	30	20	5	16	4	10	0.5		0.000723	0.00133748	2.17891	1
742	Gm20875		0.29836	0.195308	0.360337	SPIKE	30	20	5	16	4	10	0.5		0.000723	0.00133748	2.17891	1
1046	Lsamp		0.298967	0.195038	0.360337	SPIKE	34	14.17	33.29	10	23.5	8.5	0.25		0.000707	0.00131746	2.13058	1
1145	Mob3b		0.298425	0.195308	0.360337	SPIKE	18	10.5	1.5	14	2	4.5	0.5		0.000721	0.00133748	2.17371	1
1429	Plpbp		0.298451	0.195308	0.360337	SPIKE	20	1.67	10.42	2	12.5	5	0.75		0.000721	0.00133748	2.1716	1
1462	Ppfibp1		0.299073	0.195038	0.360337	SPIKE	20	13.33	4.58	16	5.5	5	0.25		0.000704	0.00131663	2.12225	1
1475	Ppp1r26		0.29853	0.195308	0.360337	SPIKE	28	21	8.75	18	7.5	7	0.25		0.000719	0.00133671	2.16524	1
1499	Prrg2		0.29836	0.195308	0.360337	SPIKE	18	16.5	7.5	22	10	6	0.5		0.000723	0.00133748	2.17891	1
1532	Rab36		0.29821	0.195308	0.360337	SPIKE	20	11.67	0.42	14	0.5	5	0.75		0.000727	0.0013435	2.19099	1
1792	Smpd4		0.298172	0.195308	0.360337	SPIKE	20	15	3.75	18	4.5	5	0.75		0.000728	0.0013435	2.19406	1
1871	Sulf1		0.298177	0.195308	0.360337	NSPIKE	20	11.67	1.67	14	2	15	0.5		0.000728	0.0013435	2.19365	1
1876	Syndig1		0.298413	0.195308	0.360337	NSPIKE	24	14.5	4	14.5	4	18	0.25		0.000722	0.00133748	2.17466	1
196	Atg9a		0.297434	0.201178	0.367544	SPIKE	32	2.67	18.67	2	14	5.33	0.5		0.000748	0.00137163	2.25453	1
198	Atp11a		0.297564	0.200358	0.367544	SPIKE	19	1.58	12.27	2	15.5	4.75	0.25		0.000745	0.00136839	2.24378	1
497	Dip2b		0.297	0.201478	0.367544	SPIKE	32	16	0	12	0	8	0.5		0.00076	0.00138699	2.29082	1
595	Epb41l3		0.297434	0.201178	0.367544	SPIKE	19	6.33	15.83	8	20	3.17	0.5		0.000748	0.00137163	2.25453	1
785	Gmeb1		0.297214	0.201388	0.367544	SPIKE	23	3.83	15.33	4	16	7.67	0.5		0.000754	0.00137718	2.2728	1
981	Larp1b		0.297263	0.201178	0.367544	NSPIKE	35	20.42	2.92	14	2	23.33	0.5		0.000753	0.00137694	2.26875	1
1169	Mrps17		0.297214	0.201388	0.367544	NSPIKE	30	22.5	7.5	18	6	20	0.5		0.000754	0.00137718	2.2728	1
1379	Phf20		0.29767	0.200338	0.367544	NSPIKE	19	12.67	3.17	16	4	15.83	0.5		0.000742	0.00136414	2.235	1
1528	Pygo2		0.297989	0.200008	0.367544	ACOS	28	7	0	6	0	28	0.25		0.000733	0.00135149	2.2089	1
1614	Rnf138		0.29794	0.200008	0.367544	SPIKE	20	5	16.25	6	19.5	5	0.25		0.000734	0.00135285	2.21292	1
1756	Slc35c2		0.297917	0.200008	0.367544	NSPIKE	25	22.92	10.42	22	10	16.67	0.5		0.000735	0.00135291	2.2148	1
1898	Tbc1d19		0.297471	0.201178	0.367544	SPIKE	32	16	0	12	0	8	0.5		0.000747	0.00137163	2.25144	1
1970	Tmem145		0.297263	0.201178	0.367544	NSPIKE	18	1.5	10.5	2	14	12	0.5		0.000753	0.00137694	2.26875	1
2060	Ttpal		0.297263	0.201178	0.367544	NSPIKE	18	1.5	10.5	2	14	12	0.5		0.000753	0.00137694	2.26875	1
2	1110017D15Rik		0.296432	0.203228	0.368959	SPIKE	25	10.42	21.35	10	20.5	6.25	0.75		0.000776	0.00140939	2.33903	1
494	Dhx35		0.296432	0.203228	0.368959	SPIKE	21	8.75	17.94	10	20.5	5.25	0.75		0.000776	0.00140939	2.33903	1
665	Fktn		0.296432	0.203228	0.368959	SPIKE	32	24	6	18	4.5	8	0.75		0.000776	0.00140939	2.33903	1
1632	Rpgrip1l		0.296432	0.203228	0.368959	SPIKE	25	0	10.94	0	10.5	6.25	0.75		0.000776	0.00140939	2.33903	1
2007	Traf3		0.296432	0.203228	0.368959	SPIKE	23	5.75	15.81	6	16.5	5.75	0.75		0.000776	0.00140939	2.33903	1
2206	Zfp429		0.296432	0.203228	0.368959	SPIKE	32	13.33	31.33	10	23.5	8	0.25		0.000776	0.00140939	2.33903	1
672	Fmnl2		0.296177	0.203478	0.369118	ACOS	32	18.67	5.33	14	4	32	0.42		0.000784	0.00142153	2.36106	1
107	Ankfy1		0.295899	0.207058	0.374716	SPIKE	33	30.25	15.81	22	11.5	8.25	0.25		0.000792	0.00143265	2.38523	1
1005	Lmo7		0.295899	0.207058	0.374716	SPIKE	23	9.58	19.65	10	20.5	5.75	0.75		0.000792	0.00143265	2.38523	1
1034	Lrrc4c		0.295899	0.207058	0.374716	SPIKE	19	6.33	14.65	8	18.5	4.75	0.75		0.000792	0.00143265	2.38523	1
66	Adgrl1		0.295157	0.211078	0.378138	NSPIKE	18	15	6	20	8	12	0.5		0.000813	0.001464	2.45089	1
144	Appl2		0.29469	0.211278	0.378138	NSPIKE	18	12	3	16	4	13.5	0.5		0.000827	0.0014809	2.49305	1
416	Coq8b		0.295238	0.210548	0.378138	NSPIKE	24	17.5	4	17.5	4	18	0.75		0.000811	0.00146367	2.44361	1
711	Gata6		0.295205	0.210548	0.378138	SPIKE	24	12	0	12	0	8	0.5		0.000812	0.00146367	2.44657	1
1199	Myo18a		0.294901	0.211278	0.378138	SPIKE	28	14	0	12	0	9.33	0.5		0.000821	0.00147069	2.4739	1
1246	Nell2		0.295221	0.210548	0.378138	ACOS	19	15.83	1.58	20	2	19	0.75		0.000812	0.00146367	2.4451	1
1310	Oxr1		0.295003	0.211078	0.378138	SPIKE	18	10.5	1.5	14	2	4.5	0.5		0.000818	0.00146753	2.4647	1
1436	Pmfbp1		0.295059	0.211078	0.378138	SPIKE	34	17	2.12	12	1.5	8.5	0.25		0.000816	0.00146568	2.45964	1
1484	Prdm10		0.295059	0.211078	0.378138	SPIKE	19	15.83	7.52	20	9.5	4.75	0.25		0.000816	0.00146568	2.45964	1
1818	Spata13		0.295615	0.209748	0.378138	SPIKE	29	4.83	19.33	4	16	4.83	0.5		0.0008	0.00144649	2.41018	1
1975	Tmem201		0.295155	0.211078	0.378138	SPIKE	18	13.5	5.62	18	7.5	4.5	0.25		0.000813	0.001464	2.45101	1
1989	Tnks1bp1		0.295059	0.211078	0.378138	SPIKE	18	10.5	1.5	14	2	4.5	0.5		0.000816	0.00146568	2.45964	1
2076	Ugdh		0.295468	0.210548	0.378138	SPIKE	24	10	20.5	10	20.5	6	0.75		0.000804	0.00145309	2.42311	1
2108	Vangl2		0.294974	0.211108	0.378138	ACOS	19	7.92	4.75	10	6	19	0.17		0.000819	0.00146795	2.46735	1
1355	Pde4dip		0.294511	0.211468	0.37818	ACOS	24	14	14	14	14	24	0		0.000833	0.00148945	2.5094	1
207	Atxn7		0.294272	0.212768	0.379609	NSPIKE	19	12.67	3.17	16	4	14.25	0.5		0.00084	0.00149895	2.53137	1
222	Bcat2		0.294272	0.212768	0.379609	NSPIKE	19	15.83	6.33	20	8	14.25	0.5		0.00084	0.00149895	2.53137	1
1976	Tmem219		0.294272	0.212768	0.379609	NSPIKE	23	13.42	1.92	14	2	17.25	0.5		0.00084	0.00149895	2.53137	1
122	Anks6		0.293805	0.214288	0.381422	SPIKE	19	3.17	11.48	4	14.5	4.75	0.75		0.000855	0.00152109	2.57481	1
176	Arsg		0.293805	0.214288	0.381422	SPIKE	29	12.08	26.58	10	22	9.67	0.5		0.000855	0.00152109	2.57481	1
1791	Smim8		0.294003	0.214288	0.381422	SPIKE	32	8	24	6	18	8	0.5		0.000848	0.0015125	2.55625	1
1212	N4bp2l2		0.293662	0.214878	0.382173	NSPIKE	28	14	0	12	0	18.67	0.5		0.000859	0.00152779	2.58818	1
278	Casd1		0.293499	0.215868	0.383334	SPIKE	24	6	16.5	6	16.5	6	0.75		0.000864	0.00153452	2.60365	1
2257	Zfyve9		0.29352	0.215868	0.383334	NSPIKE	30	12.5	27.5	10	22	20	0.5		0.000863	0.00153452	2.60165	1
519	Dnm2		0.293139	0.218728	0.386601	SPIKE	24	14	0.5	14	0.5	6	0.75		0.000876	0.00154866	2.6379	1
522	Dock3		0.293266	0.218588	0.386601	NSPIKE	24	18.5	8	18.5	8	18	0.25		0.000871	0.00154393	2.62576	1
599	Eps8		0.293364	0.218588	0.386601	SPIKE	27	4.5	18	4	16	9	0.5		0.000868	0.00154084	2.61641	1
653	Fchsd2		0.292987	0.218728	0.386601	SPIKE	29	0	16.31	0	13.5	7.25	0.25		0.00088	0.00155601	2.65249	1
1506	Psme3ip1		0.293294	0.218588	0.386601	NSPIKE	24	12.5	2	12.5	2	18	0.25		0.000871	0.00154356	2.62307	1
1579	Rev1		0.293139	0.218728	0.386601	SPIKE	20	13.33	4.58	16	5.5	5	0.25		0.000876	0.00154866	2.6379	1
1837	Srgap2		0.292422	0.220848	0.390044	NSPIKE	28	19.25	7	16.5	6	21	0.25		0.000899	0.00158704	2.70749	1
518	Dnm1		0.292153	0.223098	0.393407	SPIKE	32	16	2	12	1.5	8	0.25		0.000907	0.00160132	2.73397	1
772	Gm39323		0.292057	0.223098	0.393407	ACOS	18	4.5	4.5	6	6	18	0		0.000911	0.00160566	2.7435	1
288	Cc2d1b		0.291903	0.224468	0.394903	SPIKE	24	10	22	10	22	8	0.5		0.000916	0.00161342	2.75891	1
989	Letmd1		0.291822	0.224468	0.394903	SPIKE	21	1.75	12.25	2	14	3.5	0.5		0.000918	0.00161564	2.76698	1
2069	Uap1		0.291822	0.224468	0.394903	SPIKE	35	32.08	14.58	22	10	5.83	0.5		0.000918	0.00161564	2.76698	1
551	Edem3		0.291346	0.225718	0.396795	SPIKE	27	18	4.5	16	4	9	0.5		0.000934	0.00164242	2.81503	1
255	Cacna1e		0.290871	0.228258	0.398793	ACOS	35	8.75	2.92	6	2	35	0.17		0.00095	0.00166058	2.86376	1
694	Fry		0.291043	0.228258	0.398793	SPIKE	30	2.5	17.5	2	14	5	0.5		0.000945	0.00165157	2.84603	1
910	Iqsec3		0.291043	0.228258	0.398793	SPIKE	19	12.67	3.17	16	4	6.33	0.5		0.000945	0.00165157	2.84603	1
1386	Pid1		0.291043	0.228258	0.398793	SPIKE	18	4.5	12.38	6	16.5	4.5	0.75		0.000945	0.00165157	2.84603	1
1718	Sh3d19		0.291043	0.228258	0.398793	SPIKE	35	5.83	23.33	4	16	8.75	0.5		0.000945	0.00165157	2.84603	1
1774	Slc6a9		0.291043	0.228258	0.398793	SPIKE	18	16.5	6.38	22	8.5	4.5	0.75		0.000945	0.00165157	2.84603	1
1900	Tbc1d5		0.291151	0.228258	0.398793	SPIKE	18	10.5	1.5	14	2	4.5	0.5		0.000941	0.00165157	2.83491	1
1933	Tfb2m		0.291043	0.228258	0.398793	SPIKE	25	18.75	4.69	18	4.5	6.25	0.75		0.000945	0.00165157	2.84603	1
238	Bmp1		0.290644	0.229168	0.399462	ACOS	24	16	6	16	6	24	0.42		0.000958	0.00167038	2.8873	1
884	Ighmbp2		0.290736	0.229168	0.399462	SPIKE	23	3.83	15.33	4	16	3.83	0.5		0.000955	0.00166739	2.87771	1
1043	Lrriq1		0.290644	0.229168	0.399462	ACOS	28	18.67	7	16	6	28	0.42		0.000958	0.00167038	2.8873	1
464	D2hgdh		0.290129	0.231488	0.401779	ACOS	22	12.83	7.33	14	8	22	0.25		0.000976	0.00169904	2.94134	1
932	Kansl1l		0.289806	0.231558	0.401779	SPIKE	21	14	3.5	16	4	7	0.5		0.000988	0.00171499	2.97579	1
1289	Numb		0.289809	0.231558	0.401779	SPIKE	26	2.17	15.17	2	14	6.5	0.5		0.000988	0.00171499	2.97547	1
1308	Otud7a		0.289969	0.231488	0.401779	SPIKE	30	20	6.88	16	5.5	7.5	0.25		0.000982	0.00170756	2.95837	1
2119	Vps8		0.289775	0.231558	0.401779	SPIKE	34	28.33	11.33	20	8	8.5	0.5		0.000989	0.00171562	2.97915	1
2260	Zkscan3		0.290277	0.231318	0.401779	ACOS	28	11.67	18.67	10	16	28	0.75		0.000971	0.00169133	2.92576	1
168	Arih2		0.28953	0.235698	0.407407	NSPIKE	28	16.33	2.33	14	2	21	0.5		0.000997	0.00172943	3.00543	1
674	Fmr1		0.289394	0.235698	0.407407	SPIKE	32	16	0	12	0	8	0.5		0.00100241	0.00173547	3.02025	1
1204	Myo9a		0.289364	0.235698	0.407407	NSPIKE	31	18.73	5.17	14.5	4	23.25	0.25		0.00100347	0.00173584	3.02346	1
1231	Ncapd3		0.289341	0.235698	0.407407	ACOS	32	21.33	13.33	16	10	32	0.25		0.00100431	0.00173596	3.02598	1
2043	Tsr3		0.289391	0.235698	0.407407	SPIKE	18	15	6	20	8	4.5	0.5		0.00100249	0.00173547	3.02051	1
23	Aatk		0.289028	0.236328	0.407876	NSPIKE	31	7.75	23.25	6	18	20.67	0.5		0.00101567	0.00175293	3.0602	1
1434	Plxna3		0.289157	0.236328	0.407876	SPIKE	20	6.67	16.67	8	20	6.67	0.5		0.00101095	0.00174611	3.04599	1
426	Cpsf1		0.288873	0.239198	0.412203	SPIKE	23	7.67	17.73	8	18.5	5.75	0.75		0.00102132	0.00176002	3.07724	1
1215	Nadk2		0.288873	0.239198	0.412203	NSPIKE	23	13.9	3.83	14.5	4	17.25	0.25		0.00102132	0.00176002	3.07724	1
1943	Thrb		0.288543	0.239598	0.41258	NSPIKE	19	15.83	6.33	20	8	14.25	0.5		0.00103348	0.00177961	3.11386	1
383	Clcn3		0.287908	0.241108	0.412679	NSPIKE	34	20.54	5.67	14.5	4	25.5	0.25		0.00105724	0.00180957	3.18547	1
503	Dlg2		0.28799	0.241088	0.412679	SPIKE	22	11	1.38	12	1.5	5.5	0.25		0.00105415	0.00180809	3.17615	1
1365	Penk		0.287914	0.241108	0.412679	SPIKE	35	26.25	8.75	18	6	11.67	0.5		0.00105701	0.00180957	3.18478	1
1597	Rif1		0.287973	0.241088	0.412679	SPIKE	33	11	27.5	8	20	11	0.5		0.00105478	0.00180809	3.17806	1
1704	Sfswap		0.288408	0.240988	0.412679	SPIKE	18	10.5	1.5	14	2	4.5	0.5		0.00103851	0.00178557	3.12902	1
1895	Tatdn1		0.288081	0.241088	0.412679	NSPIKE	18	16.12	6	21.5	8	13.5	0.75		0.00105075	0.00180525	3.16591	1
2000	Tor1aip1		0.288409	0.240988	0.412679	SPIKE	18	4.5	12.38	6	16.5	4.5	0.75		0.00103846	0.00178557	3.12888	1
2095	Usp35		0.287973	0.241088	0.412679	NSPIKE	23	12.94	0	13.5	0	17.25	0.75		0.00105478	0.00180809	3.17806	1
48	Acvr2b		0.287825	0.241748	0.413463	SPIKE	32	16	0	12	0	8	0.5		0.00106041	0.00181362	3.19501	1
161	Arhgef10l		0.287494	0.242678	0.413498	NSPIKE	21	16.19	7	18.5	8	15.75	0.25		0.00107301	0.00182837	3.23298	1
387	Cldn12		0.287493	0.242678	0.413498	SPIKE	21	10.5	19.69	12	22.5	5.25	0.75		0.00107305	0.00182837	3.2331	1
1081	Mapk15		0.287494	0.242678	0.413498	NSPIKE	32	19.33	5.33	14.5	4	24	0.25		0.00107301	0.00182837	3.23298	1
1273	Nrep		0.287494	0.242678	0.413498	NSPIKE	18	15	6	20	8	12	0.5		0.00107301	0.00182837	3.23298	1
1546	Ralgapa2		0.287552	0.242678	0.413498	ACOS	18	9	13.5	12	18	18	0.75		0.00107079	0.00182837	3.22628	1
615	Evx2		0.286945	0.244278	0.41529	SPIKE	26	6.5	17.88	6	16.5	6.5	0.75		0.00109426	0.00186032	3.29701	1
1352	Pde3b		0.287213	0.244158	0.41529	SPIKE	19	14.25	4.75	18	6	3.17	0.5		0.00108383	0.00184398	3.26559	1
1682	Sema4c		0.287243	0.244158	0.41529	SPIKE	33	11	25.44	8	18.5	8.25	0.75		0.00108269	0.00184341	3.26214	1
1950	Tipin		0.286794	0.244718	0.415417	NSPIKE	27	13.5	0	12	0	20.25	0.5		0.00110016	0.00186896	3.31478	1
2139	Wdtc1		0.286693	0.244718	0.415417	SPIKE	19	15.83	5.15	20	6.5	4.75	0.75		0.00110416	0.00187435	3.32684	1
32	Abi3bp		0.286515	0.250057	0.423533	SPIKE	30	15	28.12	12	22.5	7.5	0.75		0.00111118	0.00188206	3.34799	1
887	Iho1		0.286515	0.250057	0.423533	SPIKE	27	18	4.5	16	4	9	0.5		0.00111118	0.00188206	3.34799	1
1492	Prkd1		0.286568	0.250057	0.423533	NSPIKE	32	12.67	26.67	9.5	20	24	0.75		0.00110908	0.0018813	3.34166	1
1658	Saa3		0.286392	0.251827	0.426213	NSPIKE	23	13.42	1.92	14	2	15.33	0.5		0.00111606	0.00188891	3.3627	1
72	Agbl3		0.28621	0.252387	0.426525	SPIKE	18	0	9	0	12	3	0.5		0.00112332	0.00189978	3.38456	1
1710	Sgip1		0.286134	0.252387	0.426525	ACOS	28	11.67	4.67	10	4	28	0.25		0.00112635	0.00190349	3.39369	1
145	Arap1		0.285444	0.253857	0.428055	NSPIKE	26	14.62	0	13.5	0	19.5	0.75		0.00115435	0.00194647	3.47806	1
788	Gnal		0.285653	0.253537	0.428055	SPIKE	25	10.42	21.35	10	20.5	6.25	0.75		0.00114579	0.0019349	3.45226	1
1848	St6gal1		0.28545	0.253857	0.428055	SPIKE	32	8	22	6	16.5	8	0.75		0.0011541	0.00194647	3.47731	1
2209	Zfp46		0.285014	0.254277	0.428445	ACOS	24	22	22	22	22	24	0		0.00117208	0.00197489	3.53147	1
515	Dnajb5		0.284901	0.256297	0.430891	SPIKE	22	7.33	16.96	8	18.5	5.5	0.75		0.00117678	0.00198134	3.54562	1
678	Focad		0.284662	0.256297	0.430891	SPIKE	19	15.83	7.52	20	9.5	4.75	0.25		0.0011868	0.00199526	3.57583	1
1234	Ncoa3		0.284662	0.256297	0.430891	SPIKE	32	8	26	6	19.5	8	0.25		0.0011868	0.00199526	3.57583	1
664	Fiz1		0.284401	0.258487	0.43393	ACOS	32	29.33	0	22	0	32	0.92		0.00119783	0.00201082	3.60905	1
1025	Lrp1b		0.284535	0.258317	0.43393	NSPIKE	20	7.92	16.67	9.5	20	15	0.75		0.00119217	0.00200281	3.59201	1
237	Bmf		0.28403	0.261507	0.436742	SPIKE	35	2.92	20.42	2	14	11.67	0.5		0.00121368	0.00203143	3.65681	1
634	Fam184a		0.283837	0.261507	0.436742	SPIKE	34	28.33	11.33	20	8	11.33	0.5		0.00122199	0.00204084	3.68185	1
1236	Ndor1		0.284268	0.261407	0.436742	NSPIKE	28	19.25	7	16.5	6	21	0.25		0.0012035	0.00201588	3.62614	1
1453	Porcn		0.284356	0.261407	0.436742	ACOS	20	16.67	0	20	0	20	0.83		0.00119976	0.00201258	3.61487	1
1507	Ptchd4		0.283945	0.261507	0.436742	NSPIKE	20	16.25	5	19.5	6	15	0.75		0.00121731	0.00203452	3.66775	1
1796	Snap23		0.284268	0.261407	0.436742	NSPIKE	20	3.75	15	4.5	18	15	0.25		0.0012035	0.00201588	3.62614	1
1956	Tle3		0.283998	0.261507	0.436742	NSPIKE	21	0	10.5	0	12	15.75	0.5		0.00121504	0.00203222	3.66092	1
699	Fyn		0.283547	0.262517	0.437786	NSPIKE	18	7.88	0	10.5	0	13.5	0.25		0.00123457	0.00205883	3.71978	1
942	Kcnma1		0.283662	0.262517	0.437786	NSPIKE	30	11.88	25	9.5	20	22.5	0.75		0.00122954	0.00205194	3.7046	1
539	Dusp12		0.282876	0.265847	0.441719	NSPIKE	24	13.5	0	13.5	0	18	0.75		0.00126413	0.00210055	3.80881	1
1071	Map3k10		0.282874	0.265847	0.441719	NSPIKE	18	16.5	7.5	22	10	13.5	0.5		0.00126421	0.00210055	3.80908	1
1139	Mlst8		0.28319	0.265707	0.441719	NSPIKE	24	14.5	4	14.5	4	18	0.25		0.00125023	0.00208188	3.76694	1
1652	Rxylt1		0.28319	0.265707	0.441719	ACOS	33	8.25	5.5	6	4	33	0.08		0.00125023	0.00208188	3.76694	1
2098	Usp5		0.282874	0.265847	0.441719	SPIKE	19	14.25	3.56	18	4.5	4.75	0.75		0.00126421	0.00210055	3.80908	1
1620	Rnf212b		0.282609	0.267737	0.443885	SPIKE	24	10	22	10	22	8	0.5		0.00127607	0.00211562	3.8448	1
1713	Sgms2		0.28265	0.267737	0.443885	SPIKE	24	14	0.5	14	0.5	6	0.75		0.00127422	0.00211409	3.83922	1
2205	Zfp428		0.28265	0.267737	0.443885	SPIKE	24	14	0.5	14	0.5	6	0.75		0.00127422	0.00211409	3.83922	1
2127	Wbp1l		0.282501	0.269127	0.445865	SPIKE	23	1.92	13.42	2	14	5.75	0.5		0.00128095	0.00212216	3.85951	1
81	Aifm2		0.281144	0.273927	0.44653	SPIKE	28	14	0	12	0	9.33	0.5		0.0013435	0.00220054	4.04798	1
88	Akna		0.282038	0.271897	0.44653	SPIKE	27	18	4.5	16	4	9	0.5		0.00130198	0.00214761	3.92287	1
101	Anapc10		0.281118	0.273927	0.44653	NSPIKE	28	14	0	12	0	21	0.5		0.00134472	0.00220054	4.05165	1
235	Bivm		0.282038	0.271897	0.44653	SPIKE	20	6.67	15.42	8	18.5	5	0.75		0.00130198	0.00214761	3.92287	1
332	Celf6		0.281118	0.273927	0.44653	NSPIKE	20	13.75	5	16.5	6	15	0.25		0.00134472	0.00220054	4.05165	1
501	Dixdc1		0.280942	0.274047	0.44653	ACOS	27	15.75	0	14	0	27	0.58		0.00135304	0.00220977	4.07671	1
695	Fstl5		0.280942	0.274047	0.44653	ACOS	35	11.67	14.58	8	10	35	0.92		0.00135304	0.00220977	4.07671	1
719	Ggt7		0.281489	0.273927	0.44653	ACOS	21	17.5	3.5	20	4	21	0.67		0.00132732	0.00218465	3.99922	1
903	Ints11		0.281118	0.273927	0.44653	NSPIKE	20	11.25	0	13.5	0	15	0.75		0.00134472	0.00220054	4.05165	1
1030	Lrrc28		0.282085	0.271897	0.44653	SPIKE	30	20	5	16	4	7.5	0.5		0.00129985	0.00214761	3.91644	1
1166	Mrpl39		0.281722	0.273547	0.44653	NSPIKE	32	16	0	12	0	26.67	0.5		0.0013165	0.00216841	3.96661	1
1226	Naxd		0.282038	0.271897	0.44653	SPIKE	24	6	16.5	6	16.5	6	0.75		0.00130198	0.00214761	3.92287	1
1227	Nbeal1		0.281428	0.273927	0.44653	NSPIKE	25	19.27	8.33	18.5	8	18.75	0.25		0.00133019	0.00218779	4.00787	1
1257	Nle1		0.280859	0.274047	0.44653	ACOS	35	17.5	8.75	12	6	35	0.25		0.00135697	0.00221262	4.08856	1
1304	Osbpl7		0.282038	0.271897	0.44653	SPIKE	20	13.33	2.08	16	2.5	5	0.75		0.00130198	0.00214761	3.92287	1
1385	Pibf1		0.280917	0.274047	0.44653	SPIKE	18	4.5	12.38	6	16.5	4.5	0.75		0.00135425	0.00220977	4.08036	1
1413	Plaat1		0.282085	0.271897	0.44653	SPIKE	20	13.33	4.58	16	5.5	5	0.25		0.00129985	0.00214761	3.91644	1
1460	Ppcdc		0.280917	0.274047	0.44653	SPIKE	23	21.08	9.58	22	10	5.75	0.5		0.00135425	0.00220977	4.08036	1
1596	Rhot1		0.281722	0.273547	0.44653	NSPIKE	32	16	0	12	0	26.67	0.5		0.0013165	0.00216841	3.96661	1
1655	S100a13		0.281118	0.273927	0.44653	NSPIKE	24	20.5	10	20.5	10	18	0.25		0.00134472	0.00220054	4.05165	1
1760	Slc37a3		0.281366	0.273927	0.44653	NSPIKE	28	19.25	7	16.5	6	21	0.25		0.00133309	0.00219097	4.01661	1
1851	St7		0.281118	0.273927	0.44653	NSPIKE	28	0	14	0	12	18.67	0.5		0.00134472	0.00220054	4.05165	1
2033	Trpm4		0.280792	0.274047	0.44653	ACOS	28	21	9.33	18	8	28	0.42		0.0013602	0.00221629	4.09827	1
268	Capn1		0.280445	0.276787	0.447785	SPIKE	20	18.33	7.08	22	8.5	5	0.75		0.00137681	0.00222847	4.14834	1
624	Fam110b		0.280566	0.276127	0.447785	NSPIKE	18	7.5	16.5	10	22	12	0.5		0.00137099	0.00222431	4.13079	1
842	Herc4		0.280566	0.276127	0.447785	NSPIKE	35	21.15	5.83	14.5	4	26.25	0.25		0.00137099	0.00222431	4.13079	1
943	Kcnq1		0.280445	0.276787	0.447785	SPIKE	24	10	23.5	10	23.5	6	0.25		0.00137681	0.00222847	4.14834	1
1038	Lrrc8b		0.280445	0.276787	0.447785	SPIKE	24	22	8.5	22	8.5	6	0.75		0.00137681	0.00222847	4.14834	1
1282	Nt5c		0.280431	0.276787	0.447785	SPIKE	32	8	24	6	18	10.67	0.5		0.00137747	0.00222847	4.15032	1
1331	Patj		0.280566	0.276127	0.447785	NSPIKE	23	13.42	1.92	14	2	17.25	0.5		0.00137099	0.00222431	4.13079	1
1520	Pttg1		0.280566	0.276127	0.447785	NSPIKE	35	20.42	2.92	14	2	23.33	0.5		0.00137099	0.00222431	4.13079	1
1559	Rasgrp2		0.280566	0.276127	0.447785	NSPIKE	18	7.5	16.5	10	22	12	0.5		0.00137099	0.00222431	4.13079	1
1676	Sec16b		0.280566	0.276127	0.447785	SPIKE	18	9	1.12	12	1.5	4.5	0.25		0.00137099	0.00222431	4.13079	1
297	Ccdc191		0.280263	0.279417	0.451397	SPIKE	19	17.42	7.92	22	10	4.75	0.5		0.00138557	0.00223839	4.17474	1
751	Gm30316		0.280263	0.279417	0.451397	SPIKE	23	5.75	15.81	6	16.5	5.75	0.75		0.00138557	0.00223839	4.17474	1
1174	Mtf2		0.280233	0.280857	0.453401	ACOS	30	2.5	2.5	2	2	30	0		0.00138706	0.0022392	4.17922	1
859	Hpcal1		0.279699	0.285597	0.459956	SPIKE	22	5.5	15.12	6	16.5	5.5	0.75		0.00141319	0.00227976	4.25793	1
1323	Papolg		0.279177	0.285687	0.459956	ACOS	35	2.92	29.17	2	20	35	0.25		0.00143913	0.00231996	4.3361	1
1525	Pxk		0.279145	0.285727	0.459956	SPIKE	28	14	0	12	0	9.33	0.5		0.00144073	0.00232089	4.34092	1
1958	Tlr3		0.279101	0.285727	0.459956	ACOS	35	20.42	17.5	14	12	35	0.08		0.00144298	0.00232287	4.34769	1
1552	Rapgef1		0.278252	0.288837	0.464633	SPIKE	34	25.5	6.38	18	4.5	8.5	0.75		0.00148624	0.00239081	4.47804	1
1602	Riok1		0.278075	0.289157	0.464819	NSPIKE	28	19.25	7	16.5	6	21	0.25		0.0014954	0.00240385	4.50565	1
351	Cep70		0.277668	0.291657	0.466905	SPIKE	24	2	14	2	14	6	0.5		0.00151669	0.00242948	4.56979	1
513	Dnah9		0.277668	0.291657	0.466905	ACOS	35	23.33	8.75	16	6	35	0.42		0.00151669	0.00242948	4.56979	1
883	Igf2		0.277818	0.291657	0.466905	NSPIKE	28	23.92	11.67	20.5	10	21	0.25		0.00150878	0.00242365	4.54596	1
1136	Mlh1		0.277588	0.291687	0.466905	SPIKE	34	2.83	19.83	2	14	11.33	0.5		0.00152088	0.00243162	4.5824	1
1319	Palld		0.277668	0.291657	0.466905	SPIKE	20	6.67	16.67	8	20	6.67	0.5		0.00151669	0.00242948	4.56979	1
2132	Wdr4		0.277668	0.291657	0.466905	ACOS	34	28.33	2.83	20	2	34	0.75		0.00151669	0.00242948	4.56979	1
1001	Lkaaear1		0.277561	0.295447	0.471264	SPIKE	27	18	4.5	16	4	9	0.5		0.0015223	0.00243162	4.5867	1
1033	Lrrc49		0.277303	0.295447	0.471264	SPIKE	24	6	16.5	6	16.5	6	0.75		0.00153601	0.00245007	4.628	1
1084	Mapkap1		0.277561	0.295447	0.471264	SPIKE	20	0	8.75	0	10.5	5	0.75		0.0015223	0.00243162	4.5867	1
1448	Polr3c		0.277561	0.295447	0.471264	SPIKE	24	6	16.5	6	16.5	6	0.75		0.0015223	0.00243162	4.5867	1
1716	Sh2b3		0.277528	0.295447	0.471264	SPIKE	19	0	8.31	0	10.5	4.75	0.75		0.00152406	0.00243272	4.592	1
357	Cfap206		0.277102	0.297837	0.473985	SPIKE	21	19.25	8.75	22	10	7	0.5		0.00154673	0.00246543	4.66028	1
777	Gm4924		0.276956	0.297987	0.473985	SPIKE	24	12	0	12	0	8	0.5		0.00155458	0.00247448	4.68394	1
1061	Macir		0.276956	0.297987	0.473985	SPIKE	24	12	0	12	0	8	0.5		0.00155458	0.00247448	4.68394	1
1108	Meis3		0.276909	0.297987	0.473985	ACOS	35	32.08	2.92	22	2	35	0.83		0.0015571	0.00247676	4.69155	1
47	Acvr1		0.276863	0.300027	0.47525	SPIKE	18	13.5	5.62	18	7.5	4.5	0.25		0.00155957	0.00247722	4.69898	1
62	Adcyap1r1		0.27683	0.300027	0.47525	SPIKE	18	1.5	11.62	2	15.5	4.5	0.25		0.00156137	0.00247835	4.70441	1
364	Cflar		0.275753	0.302327	0.47525	NSPIKE	24	14.5	4	14.5	4	18	0.25		0.00162057	0.00255316	4.88278	1
365	Cgn		0.2768	0.300027	0.47525	SPIKE	32	8	22	6	16.5	8	0.75		0.00156301	0.00247921	4.70934	1
506	Dmd		0.275728	0.302327	0.47525	SPIKE	19	12.67	4.35	16	5.5	4.75	0.25		0.00162198	0.00255316	4.88702	1
547	Ebf3		0.275753	0.302327	0.47525	NSPIKE	24	14.5	4	14.5	4	18	0.25		0.00162057	0.00255316	4.88278	1
633	Fam172a		0.275728	0.302327	0.47525	SPIKE	24	20	9.5	20	9.5	6	0.25		0.00162198	0.00255316	4.88702	1
879	Ids		0.275728	0.302327	0.47525	SPIKE	23	5.75	18.69	6	19.5	5.75	0.25		0.00162198	0.00255316	4.88702	1
1065	Magi1		0.276247	0.300577	0.47525	NSPIKE	32	18.67	2.67	14	2	24	0.5		0.00159314	0.00252173	4.80013	1
1185	Mtmr2		0.276139	0.300727	0.47525	SPIKE	29	12.08	26.58	10	22	9.67	0.5		0.00159911	0.00252943	4.81813	1
1351	Pde2a		0.275594	0.302337	0.47525	SPIKE	24	22	8.5	22	8.5	6	0.75		0.00162945	0.00256138	4.90955	1
1366	Per3		0.276865	0.300027	0.47525	ACOS	20	3.33	10	4	12	20	0.67		0.00155948	0.00247722	4.69872	1
1390	Pigp		0.276079	0.301367	0.47525	NSPIKE	34	28.33	11.33	20	8	28.33	0.5		0.00160244	0.00253292	4.82815	1
1473	Ppp1r14c		0.276385	0.300577	0.47525	ACOS	26	17.33	2.17	16	2	26	0.58		0.00158556	0.00251148	4.77728	1
1577	Reps2		0.275594	0.302337	0.47525	SPIKE	34	28.33	11.33	20	8	5.67	0.5		0.00162945	0.00256138	4.90955	1
1680	Sema4a		0.275753	0.302327	0.47525	NSPIKE	24	13.5	0	13.5	0	18	0.75		0.00162057	0.00255316	4.88278	1
1902	Tbccd1		0.276535	0.300307	0.47525	SPIKE	19	9.5	1.19	12	1.5	4.75	0.25		0.00157737	0.00250025	4.75262	1
598	Eps15		0.275529	0.304097	0.477027	NSPIKE	21	15.31	3.5	17.5	4	15.75	0.75		0.00163311	0.00256449	4.92057	1
876	Ice2		0.275519	0.304097	0.477027	SPIKE	18	16.5	6.38	22	8.5	4.5	0.75		0.00163369	0.00256449	4.92232	1
1582	Rfx5		0.275427	0.304097	0.477027	NSPIKE	24	20.5	10	20.5	10	18	0.25		0.00163887	0.00257085	4.93793	1
1683	Sema4d		0.275211	0.307177	0.480814	SPIKE	18	0	7.88	0	10.5	4.5	0.75		0.00165113	0.0025865	4.97485	1
1932	Tfb1m		0.274998	0.307357	0.480814	NSPIKE	25	12.5	0	12	0	16.67	0.5		0.00166326	0.00260191	5.01139	1
2041	Tspan9		0.275133	0.307217	0.480814	ACOS	28	23.33	2.33	20	2	28	0.75		0.00165557	0.00259167	4.98822	1
2089	Usp19		0.275211	0.307177	0.480814	NSPIKE	35	8.75	26.25	6	18	26.25	0.5		0.00165113	0.0025865	4.97485	1
452	Cwc22		0.274685	0.309677	0.483795	ACOS	35	32.08	0	22	0	35	0.92		0.00168126	0.00262827	5.06564	1
682	Foxn3		0.274179	0.310327	0.483795	NSPIKE	18	15	6	20	8	12	0.5		0.00171076	0.00266705	5.15453	1
888	Iigp1		0.274476	0.310327	0.483795	ACOS	35	17.5	8.75	12	6	35	0.25		0.00169338	0.00264358	5.10216	1
1345	Pcsk5		0.274476	0.310327	0.483795	ACOS	18	15	4.5	20	6	18	0.58		0.00169338	0.00264358	5.10216	1
1953	Tkfc		0.274414	0.310327	0.483795	ACOS	35	11.67	32.08	8	22	35	0.42		0.001697	0.00264741	5.11305	1
663	Filip1		0.273838	0.314097	0.487326	SPIKE	20	6.67	16.67	8	20	6.67	0.5		0.00173089	0.00269338	5.21518	1
931	Kank1		0.273961	0.313027	0.487326	SPIKE	32	24	8	18	6	8	0.5		0.00172358	0.00268519	5.19313	1
977	Ksr1		0.273709	0.314097	0.487326	SPIKE	26	2.17	16.79	2	15.5	6.5	0.25		0.00173855	0.00270297	5.23827	1
1021	Lrif1		0.273594	0.314097	0.487326	ACOS	22	16.5	0	18	0	22	0.75		0.00174544	0.00271182	5.25902	1
1539	Rabggta		0.273351	0.314307	0.487326	SPIKE	20	15	3.75	18	4.5	5	0.75		0.00176002	0.0027326	5.30295	1
1724	Shld2		0.273281	0.314307	0.487326	SPIKE	30	27.5	12.5	22	10	10	0.5		0.00176422	0.00273539	5.3156	1
1954	Tle1		0.273833	0.314097	0.487326	SPIKE	19	14.25	3.56	18	4.5	4.75	0.75		0.00173121	0.00269338	5.21613	1
2111	Vcpkmt		0.273281	0.314307	0.487326	SPIKE	26	23.83	10.83	22	10	8.67	0.5		0.00176422	0.00273539	5.3156	1
579	Eml4		0.273084	0.316747	0.490774	SPIKE	32	0	16	0	12	5.33	0.5		0.00177614	0.00275199	5.35151	1
109	Ankrd13b		0.271493	0.324657	0.495558	NSPIKE	28	19.25	7	16.5	6	21	0.25		0.00187526	0.00286263	5.65015	1
465	D3Ertd751e		0.271693	0.324517	0.495558	NSPIKE	23	13.9	3.83	14.5	4	17.25	0.25		0.00186254	0.0028528	5.61184	1
474	Dcun1d4		0.271973	0.322607	0.495558	ACOS	18	9	7.5	12	10	18	0.08		0.00184484	0.00283715	5.55849	1
509	Dmxl2		0.271827	0.323867	0.495558	SPIKE	20	13.33	4.58	16	5.5	5	0.25		0.00185406	0.00284364	5.58628	1
521	Dock11		0.271503	0.324567	0.495558	SPIKE	20	8.33	17.08	10	20.5	5	0.75		0.0018746	0.00286263	5.64818	1
523	Dock4		0.272411	0.322437	0.495558	ACOS	32	5.33	18.67	4	14	32	0.58		0.00181752	0.00280083	5.47619	1
619	Eya3		0.271827	0.323867	0.495558	SPIKE	34	28.33	11.33	20	8	5.67	0.5		0.00185406	0.00284364	5.58628	1
836	Hdac9		0.27273	0.322137	0.495558	SPIKE	34	5.67	20.54	4	14.5	8.5	0.75		0.00179777	0.00278263	5.41669	1
1168	Mrps10		0.272681	0.322137	0.495558	SPIKE	28	16.33	2.33	14	2	9.33	0.5		0.00180082	0.00278263	5.42586	1
1275	Nrg2		0.272681	0.322137	0.495558	NSPIKE	21	11.81	0	13.5	0	15.75	0.75		0.00180082	0.00278263	5.42586	1
1405	Pkd1		0.271586	0.324567	0.495558	NSPIKE	32	20.67	2.67	15.5	2	24	0.75		0.00186936	0.00285938	5.63237	1
1415	Plag1		0.271185	0.325067	0.495558	ACOS	21	8.75	8.75	10	10	21	0		0.00189505	0.00288897	5.7098	1
1461	Ppfia2		0.272681	0.322137	0.495558	NSPIKE	18	16.88	9	22.5	12	13.5	0.25		0.00180082	0.00278263	5.42586	1
1575	Relch		0.272571	0.322237	0.495558	SPIKE	27	4.5	18	4	16	9	0.5		0.00180762	0.00279125	5.44635	1
1754	Slc30a6		0.271503	0.324567	0.495558	SPIKE	20	11.67	1.67	14	2	6.67	0.5		0.0018746	0.00286263	5.64818	1
1759	Slc35e2		0.272171	0.322437	0.495558	SPIKE	32	24	10	18	7.5	8	0.25		0.00183241	0.00281995	5.52105	1
1795	Smurf1		0.272475	0.322437	0.495558	SPIKE	18	12	1.88	16	2.5	4.5	0.75		0.00181355	0.00279661	5.46422	1
1825	Spats2l		0.272171	0.322437	0.495558	SPIKE	32	18.67	4.67	14	3.5	8	0.25		0.00183241	0.00281995	5.52105	1
1930	Tex9		0.271693	0.324517	0.495558	NSPIKE	27	15.75	2.25	14	2	20.25	0.5		0.00186254	0.0028528	5.61184	1
1939	Tgfbrap1		0.271285	0.325067	0.495558	ACOS	19	19	17.42	24	22	19	0.08		0.00188862	0.0028811	5.69042	1
1985	Tmem94		0.27183	0.323867	0.495558	SPIKE	20	10	18.75	12	22.5	5	0.75		0.00185386	0.00284364	5.58569	1
2009	Trak2		0.271586	0.324567	0.495558	NSPIKE	32	20.67	2.67	15.5	2	24	0.75		0.00186936	0.00285938	5.63237	1
2078	Ulk1		0.271827	0.323867	0.495558	SPIKE	20	18.33	7.08	22	8.5	5	0.75		0.00185406	0.00284364	5.58628	1
2168	Zdhhc23		0.272475	0.322437	0.495558	SPIKE	18	16.5	6.38	22	8.5	4.5	0.75		0.00181355	0.00279661	5.46422	1
173	Arnt		0.268664	0.340207	0.499541	NSPIKE	24	16.5	6	16.5	6	18	0.25		0.00206398	0.00303063	6.21876	1
187	Aste1		0.270815	0.331217	0.499541	SPIKE	32	16	0	12	0	8	0.5		0.00191903	0.00290679	5.78203	1
228	Bcorl1		0.270243	0.334487	0.499541	SPIKE	20	18.33	7.08	22	8.5	5	0.75		0.00195664	0.0029512	5.89537	1
247	Btbd10		0.270664	0.334337	0.499541	SPIKE	32	8	24	6	18	8	0.5		0.00192887	0.00291704	5.81168	1
360	Cfap61		0.270815	0.331217	0.499541	SPIKE	34	28.33	11.33	20	8	5.67	0.5		0.00191903	0.00290679	5.78203	1
373	Chst1		0.270008	0.335267	0.499541	SPIKE	24	6	18	6	18	6	0.5		0.00197229	0.00296668	5.94251	1
374	Cibar1		0.269129	0.339437	0.499541	NSPIKE	34	19.83	2.83	14	2	25.5	0.5		0.00203185	0.00301069	6.12196	1
434	Crlf1		0.26968	0.336667	0.499541	NSPIKE	18	15	6	20	8	12	0.5		0.00199432	0.00296668	6.00889	1
446	Ctbp2		0.268866	0.339557	0.499541	NSPIKE	32	8	24	6	18	24	0.5		0.00204994	0.00303063	6.17646	1
468	Dbndd1		0.269763	0.336667	0.499541	SPIKE	30	5	20	4	16	7.5	0.5		0.0019887	0.00296668	5.99194	1
517	Dnajc27		0.269025	0.339437	0.499541	SPIKE	32	16	0	12	0	8	0.5		0.00203898	0.00301928	6.14344	1
567	Eipr1		0.268664	0.340207	0.499541	NSPIKE	28	14	0	12	0	21	0.5		0.00206398	0.00303063	6.21876	1
575	Eme1		0.268848	0.339557	0.499541	NSPIKE	20	12.08	3.33	14.5	4	15	0.25		0.00205121	0.00303063	6.18029	1
582	Emsy		0.268664	0.340207	0.499541	NSPIKE	24	20	8	20	8	20	0.5		0.00206398	0.00303063	6.21876	1
612	Ets1		0.270815	0.331217	0.499541	SPIKE	30	20	5	16	4	7.5	0.5		0.00191903	0.00290679	5.78203	1
684	Fpgs		0.270828	0.329667	0.499541	ACOS	35	32.08	2.92	22	2	35	0.83		0.00191815	0.00290679	5.77939	1
731	Gm11476		0.269129	0.339437	0.499541	NSPIKE	31	23.9	10.33	18.5	8	23.25	0.25		0.00203185	0.00301069	6.12196	1
756	Gm32313		0.269763	0.336667	0.499541	SPIKE	18	12	3	16	4	4.5	0.5		0.0019887	0.00296668	5.99194	1
786	Gmeb2		0.269907	0.336637	0.499541	ACOS	33	13.75	13.75	10	10	33	0		0.00197905	0.00296668	5.96289	1
789	Gnb1l		0.26968	0.336667	0.499541	NSPIKE	32	24	8	18	6	21.33	0.5		0.00199432	0.00296668	6.00889	1
894	Ildr2		0.270815	0.331217	0.499541	SPIKE	32	16	0	12	0	8	0.5		0.00191903	0.00290679	5.78203	1
966	Klhl13		0.268908	0.339557	0.499541	ACOS	19	17.42	1.58	22	2	19	0.83		0.00204705	0.00302926	6.16776	1
984	Ldlrad3		0.268664	0.340207	0.499541	NSPIKE	32	16	0	12	0	26.67	0.5		0.00206398	0.00303063	6.21876	1
1032	Lrrc40		0.270175	0.335267	0.499541	SPIKE	19	3.17	11.48	4	14.5	4.75	0.75		0.00196118	0.00295608	5.90905	1
1063	Mad2l2		0.269184	0.339437	0.499541	NSPIKE	18	10.5	1.5	14	2	12	0.5		0.00202804	0.00301069	6.11048	1
1130	Mif4gd		0.270243	0.334487	0.499541	SPIKE	20	13.33	4.58	16	5.5	5	0.25		0.00195664	0.0029512	5.89537	1
1161	Mppe1		0.26968	0.336667	0.499541	NSPIKE	28	12.25	0	10.5	0	21	0.25		0.00199432	0.00296668	6.00889	1
1198	Myo15		0.268688	0.340207	0.499541	SPIKE	23	7.67	19.17	8	20	5.75	0.5		0.00206232	0.00303063	6.21378	1
1217	Naf1		0.270815	0.331217	0.499541	SPIKE	32	24	8	18	6	8	0.5		0.00191903	0.00290679	5.78203	1
1221	Nars2		0.269763	0.336667	0.499541	SPIKE	18	6	15	8	20	6	0.5		0.0019887	0.00296668	5.99194	1
1248	Nf2		0.26968	0.336667	0.499541	NSPIKE	31	13.56	0	10.5	0	23.25	0.25		0.00199432	0.00296668	6.00889	1
1271	Nr2f1		0.270398	0.334487	0.499541	NSPIKE	29	21.75	7.25	18	6	19.33	0.5		0.00194638	0.00294158	5.86446	1
1295	Oard1		0.268664	0.340207	0.499541	NSPIKE	24	20.5	10	20.5	10	18	0.25		0.00206398	0.00303063	6.21876	1
1369	Pfkfb3		0.26968	0.336667	0.499541	NSPIKE	24	22	10	22	10	16	0.5		0.00199432	0.00296668	6.00889	1
1382	Phkb		0.26968	0.336667	0.499541	NSPIKE	18	3	12	4	16	13.5	0.5		0.00199432	0.00296668	6.00889	1
1383	Phkg2		0.270787	0.331217	0.499541	ACOS	34	17	11.33	12	8	34	0.17		0.00192081	0.00290679	5.7874	1
1394	Pik3cb		0.270815	0.331217	0.499541	SPIKE	30	20	5	16	4	7.5	0.5		0.00191903	0.00290679	5.78203	1
1406	Pkd1l3		0.269984	0.335427	0.499541	NSPIKE	29	14.5	0	12	0	24.17	0.5		0.00197386	0.00296668	5.94725	1
1476	Ppp1r32		0.26968	0.336667	0.499541	NSPIKE	32	24	8	18	6	21.33	0.5		0.00199432	0.00296668	6.00889	1
1627	Robo2		0.269132	0.339437	0.499541	NSPIKE	20	11.25	0	13.5	0	15	0.75		0.00203166	0.00301069	6.12139	1
1639	Rptor		0.26968	0.336667	0.499541	SPIKE	30	20	3.12	16	2.5	7.5	0.75		0.00199432	0.00296668	6.00889	1
1679	Sema3a		0.269484	0.337237	0.499541	SPIKE	30	17.5	0.62	14	0.5	7.5	0.75		0.00200759	0.00298251	6.04886	1
1733	Slc12a5		0.26968	0.336667	0.499541	NSPIKE	28	12.25	0	10.5	0	21	0.25		0.00199432	0.00296668	6.00889	1
1746	Slc25a14		0.270807	0.331217	0.499541	SPIKE	29	26.58	12.08	22	10	4.83	0.5		0.00191954	0.00290679	5.78358	1
1748	Slc25a44		0.270815	0.331217	0.499541	SPIKE	30	20	5	16	4	7.5	0.5		0.00191903	0.00290679	5.78203	1
1785	Slx4		0.270815	0.331217	0.499541	SPIKE	30	20	5	16	4	7.5	0.5		0.00191903	0.00290679	5.78203	1
1806	Snx29		0.26968	0.336667	0.499541	NSPIKE	22	11	0	12	0	16.5	0.5		0.00199432	0.00296668	6.00889	1
1830	Sppl2b		0.268664	0.340207	0.499541	NSPIKE	20	13.75	5	16.5	6	15	0.25		0.00206398	0.00303063	6.21876	1
1881	Syt3		0.26968	0.336667	0.499541	SPIKE	24	16	2.5	16	2.5	6	0.75		0.00199432	0.00296668	6.00889	1
1887	Tacc3		0.26968	0.336667	0.499541	NSPIKE	18	3	12	4	16	13.5	0.5		0.00199432	0.00296668	6.00889	1
1925	Tet2		0.268664	0.340207	0.499541	NSPIKE	27	4.5	18	4	16	18	0.5		0.00206398	0.00303063	6.21876	1
1931	Tfap4		0.269634	0.336817	0.499541	SPIKE	19	11.08	0.4	14	0.5	4.75	0.75		0.00199741	0.00296934	6.01821	1
1957	Tln2		0.269931	0.336637	0.499541	ACOS	28	7	4.67	6	4	28	0.08		0.00197747	0.00296668	5.95811	1
1988	Tnip1		0.270243	0.334487	0.499541	SPIKE	32	5.33	21.33	4	16	5.33	0.5		0.00195664	0.0029512	5.89537	1
2006	Tra2a		0.268664	0.340207	0.499541	NSPIKE	32	16	0	12	0	26.67	0.5		0.00206398	0.00303063	6.21876	1
2186	Zfp26		0.269763	0.336667	0.499541	SPIKE	27	0	11.81	0	10.5	6.75	0.75		0.0019887	0.00296668	5.99194	1
2225	Zfp639		0.268664	0.340207	0.499541	NSPIKE	28	8.75	21	7.5	18	21	0.75		0.00206398	0.00303063	6.21876	1
810	Greb1		0.268277	0.344917	0.504692	SPIKE	35	26.25	8.75	18	6	11.67	0.5		0.00209107	0.00306448	6.30041	1
996	Limch1		0.268095	0.345047	0.504692	SPIKE	33	11	27.5	8	20	11	0.5		0.00210395	0.00307938	6.3392	1
1540	Rad18		0.268277	0.344917	0.504692	SPIKE	35	26.25	8.75	18	6	11.67	0.5		0.00209107	0.00306448	6.30041	1
1654	Ryr2		0.26801	0.345047	0.504692	SPIKE	28	4.67	16.92	4	14.5	7	0.75		0.00210999	0.00308624	6.35741	1
1813	Sox5		0.268438	0.344887	0.504692	SPIKE	18	4.5	13.5	6	18	3	0.5		0.00207981	0.0030519	6.26645	1
2059	Ttn		0.268175	0.344917	0.504692	SPIKE	34	2.83	19.83	2	14	11.33	0.5		0.00209833	0.00307313	6.32226	1
394	Cmbl		0.266587	0.352726	0.510147	NSPIKE	31	18.73	5.17	14.5	4	23.25	0.25		0.00221331	0.0032146	6.66869	1
597	Epn2		0.26631	0.352816	0.510147	SPIKE	24	4	17.5	4	17.5	6	0.25		0.00223398	0.00323017	6.73097	1
716	Gfm2		0.266698	0.352526	0.510147	SPIKE	32	16	0	12	0	8	0.5		0.0022051	0.00320883	6.64397	1
1036	Lrrc57		0.266711	0.352526	0.510147	SPIKE	34	28.33	11.33	20	8	11.33	0.5		0.00220418	0.00320883	6.64118	1
1156	Mphosph9		0.266335	0.352816	0.510147	NSPIKE	24	14.5	4	14.5	4	18	0.25		0.00223211	0.00322973	6.72535	1
1305	Oser1		0.266351	0.352816	0.510147	SPIKE	19	15.83	5.15	20	6.5	4.75	0.75		0.00223094	0.00322973	6.72181	1
1322	Paox		0.266396	0.352726	0.510147	SPIKE	18	6	16.12	8	21.5	4.5	0.25		0.00222758	0.00322973	6.71169	1
1337	Pcbp3		0.267609	0.349677	0.510147	NSPIKE	18	12	3	16	4	13.5	0.5		0.00213866	0.00312215	6.44379	1
1370	Pfkfb4		0.266535	0.352726	0.510147	ACOS	32	8	2.67	6	2	32	0.17		0.00221721	0.00321822	6.68047	1
1409	Pkmyt1		0.266642	0.352526	0.510147	SPIKE	27	4.5	18	4	16	9	0.5		0.00220924	0.00321279	6.65643	1
1431	Plppr3		0.266335	0.352816	0.510147	NSPIKE	24	17.5	4	17.5	4	18	0.75		0.00223211	0.00322973	6.72535	1
1527	Pycr1		0.267787	0.349677	0.510147	SPIKE	18	16.5	7.5	22	10	6	0.5		0.00212588	0.00310748	6.40529	1
1538	Rabgef1		0.267297	0.349817	0.510147	SPIKE	31	0	13.56	0	10.5	7.75	0.75		0.00216121	0.00315303	6.51172	1
1651	Rusc2		0.266934	0.352476	0.510147	SPIKE	32	8	24	6	18	10.67	0.5		0.0021877	0.00318759	6.59153	1
1677	Sec61a2		0.267609	0.349677	0.510147	NSPIKE	34	27.62	8.5	19.5	6	25.5	0.75		0.00213866	0.00312215	6.44379	1
1703	Sfmbt1		0.266587	0.352726	0.510147	SPIKE	25	4.17	15.1	4	14.5	6.25	0.75		0.00221331	0.0032146	6.66869	1
1951	Tjap1		0.267261	0.352476	0.510147	SPIKE	28	0	14	0	12	7	0.5		0.00216382	0.00315482	6.51958	1
2134	Wdr47		0.266333	0.352816	0.510147	ACOS	26	23.83	2.17	22	2	26	0.83		0.00223225	0.00322973	6.72577	1
1777	Slc8a1		0.266003	0.358086	0.517438	NSPIKE	31	12.92	28.42	10	22	20.67	0.5		0.00225705	0.00326146	6.8005	1
337	Cenpx		0.265546	0.360096	0.518694	NSPIKE	35	21.15	5.83	14.5	4	26.25	0.25		0.00229183	0.00330751	6.90527	1
548	Eci2		0.265628	0.360096	0.518694	NSPIKE	30	11.88	25	9.5	20	22.5	0.75		0.00228558	0.00330058	6.88644	1
616	Exd1		0.265481	0.360096	0.518694	SPIKE	30	5	20	4	16	7.5	0.5		0.00229677	0.00330834	6.92017	1
1055	Lyrm1		0.265481	0.360096	0.518694	SPIKE	19	0	8.31	0	10.5	4.75	0.75		0.00229677	0.00330834	6.92017	1
1339	Pcdh19		0.265481	0.360096	0.518694	SPIKE	32	8	24	6	18	10.67	0.5		0.00229677	0.00330834	6.92017	1
114	Ankrd28		0.265274	0.362086	0.518918	ACOS	34	11.33	25.5	8	18	34	0.58		0.00231273	0.0033187	6.96825	1
142	Apod		0.265351	0.362086	0.518918	SPIKE	19	3.17	11.48	4	14.5	4.75	0.75		0.00230676	0.00331224	6.95028	1
172	Armt1		0.265351	0.362086	0.518918	SPIKE	35	32.08	14.58	22	10	11.67	0.5		0.00230676	0.00331224	6.95028	1
189	Asxl3		0.265351	0.362086	0.518918	SPIKE	34	28.33	13.46	20	9.5	8.5	0.25		0.00230676	0.00331224	6.95028	1
300	Ccdc38		0.264962	0.362306	0.518918	SPIKE	35	2.92	20.42	2	14	8.75	0.5		0.00233697	0.00334716	7.04129	1
353	Cep95		0.265351	0.362086	0.518918	SPIKE	33	30.25	13.75	22	10	8.25	0.5		0.00230676	0.00331224	6.95028	1
1074	Map4k3		0.265351	0.362086	0.518918	SPIKE	18	16.5	7.5	22	10	6	0.5		0.00230676	0.00331224	6.95028	1
1502	Prss23		0.26502	0.362306	0.518918	ACOS	20	13.33	10	16	12	20	0.17		0.0023324	0.00334272	7.02752	1
1780	Slc9a8		0.265207	0.362086	0.518918	SPIKE	20	1.67	11.67	2	14	6.67	0.5		0.00231795	0.0033241	6.98398	1
1656	S100a16		0.264575	0.365346	0.522942	NSPIKE	28	19.25	7	16.5	6	21	0.25		0.00236728	0.00338843	7.1326	1
29	Abhd11		0.264044	0.366566	0.523699	SPIKE	24	12	0	12	0	8	0.5		0.00240946	0.00342555	7.25972	1
2133	Wdr41		0.264044	0.366566	0.523699	SPIKE	18	4.5	13.5	6	18	3	0.5		0.00240946	0.00342555	7.25972	1
2152	Zbed3		0.264044	0.366566	0.523699	SPIKE	32	24	8	18	6	8	0.5		0.00240946	0.00342555	7.25972	1
19	A630039O03Rik		0.263909	0.371426	0.525686	SPIKE	20	5	13.75	6	16.5	5	0.75		0.00242034	0.00342555	7.2925	1
53	Adamts9		0.263909	0.371426	0.525686	SPIKE	24	2	12.5	2	12.5	6	0.75		0.00242034	0.00342555	7.2925	1
295	Ccdc157		0.263909	0.371426	0.525686	SPIKE	30	15	28.12	12	22.5	7.5	0.75		0.00242034	0.00342555	7.2925	1
407	Col13a1		0.263909	0.371426	0.525686	SPIKE	30	15	28.12	12	22.5	7.5	0.75		0.00242034	0.00342555	7.2925	1
418	Coro6		0.263909	0.371426	0.525686	SPIKE	20	10	18.75	12	22.5	5	0.75		0.00242034	0.00342555	7.2925	1
668	Flnc		0.263909	0.371426	0.525686	SPIKE	24	8	20	8	20	4	0.5		0.00242034	0.00342555	7.2925	1
780	Gm773		0.263909	0.371426	0.525686	SPIKE	28	14	0	12	0	9.33	0.5		0.00242034	0.00342555	7.2925	1
1009	LOC118567481		0.263909	0.371426	0.525686	SPIKE	20	13.33	2.08	16	2.5	5	0.75		0.00242034	0.00342555	7.2925	1
1013	LOC118568080		0.263909	0.371426	0.525686	SPIKE	20	13.33	2.08	16	2.5	5	0.75		0.00242034	0.00342555	7.2925	1
1154	Mospd1		0.263909	0.371426	0.525686	SPIKE	24	4	16	4	16	6	0.5		0.00242034	0.00342555	7.2925	1
1238	Ndufaf5		0.263909	0.371426	0.525686	SPIKE	28	21	8.75	18	7.5	7	0.25		0.00242034	0.00342555	7.2925	1
1242	Neil1		0.263909	0.371426	0.525686	SPIKE	24	0	12	0	12	4	0.5		0.00242034	0.00342555	7.2925	1
1388	Pign		0.263909	0.371426	0.525686	SPIKE	24	6	16.5	6	16.5	6	0.75		0.00242034	0.00342555	7.2925	1
1514	Ptprq		0.263909	0.371426	0.525686	SPIKE	24	8	20	8	20	4	0.5		0.00242034	0.00342555	7.2925	1
1750	Slc26a4		0.263909	0.371426	0.525686	SPIKE	24	0	12	0	12	4	0.5		0.00242034	0.00342555	7.2925	1
197	Atp10a		0.263181	0.374886	0.526803	NSPIKE	19	17.42	7.92	22	10	12.67	0.5		0.00247959	0.00348985	7.471	1
260	Cadm2		0.263181	0.374886	0.526803	NSPIKE	18	7.5	16.5	10	22	12	0.5		0.00247959	0.00348985	7.471	1
477	Ddx56		0.263541	0.373136	0.526803	SPIKE	19	9.5	1.19	12	1.5	4.75	0.25		0.00245014	0.00346341	7.38226	1
484	Depdc5		0.263181	0.374886	0.526803	NSPIKE	23	13.42	1.92	14	2	17.25	0.5		0.00247959	0.00348985	7.471	1
537	Dus1l		0.263181	0.374886	0.526803	NSPIKE	18	13.5	4.5	18	6	12	0.5		0.00247959	0.00348985	7.471	1
640	Fam229b		0.263181	0.374886	0.526803	NSPIKE	35	20.42	2.92	14	2	23.33	0.5		0.00247959	0.00348985	7.471	1
670	Flt3l		0.262947	0.374996	0.526803	ACOS	18	13.5	10.5	18	14	18	0.17		0.00249886	0.0035148	7.52907	1
933	Kash5		0.263181	0.374886	0.526803	NSPIKE	35	8.75	26.25	6	18	23.33	0.5		0.00247959	0.00348985	7.471	1
1437	Pml		0.262887	0.374996	0.526803	SPIKE	23	1.92	13.42	2	14	7.67	0.5		0.00250387	0.00351748	7.54415	1
1827	Sphkap		0.263711	0.372966	0.526803	ACOS	28	9.33	9.33	8	8	28	0		0.00243632	0.00344603	7.34064	1
1889	Taf1a		0.262887	0.374996	0.526803	SPIKE	23	7.67	17.73	8	18.5	5.75	0.75		0.00250387	0.00351748	7.54415	1
2241	Zfp800		0.263498	0.373136	0.526803	NSPIKE	18	16.5	7.5	22	10	13.5	0.5		0.00245363	0.00346619	7.39278	1
205	Atxn1		0.262435	0.376266	0.527608	NSPIKE	18	15	6	20	8	12	0.5		0.00254161	0.0035639	7.65787	1
421	Cpeb2		0.262526	0.376266	0.527608	ACOS	29	16.92	12.08	14	10	29	0.17		0.00253398	0.00355539	7.63488	1
2217	Zfp54		0.262742	0.375836	0.527608	NSPIKE	27	12.94	24.75	11.5	22	20.25	0.75		0.00251587	0.00353216	7.58031	1
30	Abhd14a		0.261788	0.377636	0.528877	SPIKE	20	15	3.75	18	4.5	5	0.75		0.00259658	0.00363873	7.82349	1
2044	Tstd2		0.26171	0.377636	0.528877	ACOS	35	0	0	0	0	35	0		0.00260326	0.00364584	7.84362	1
1309	Otud7b		0.261569	0.384406	0.538027	SPIKE	30	10	23.12	8	18.5	7.5	0.75		0.00261535	0.00366052	7.88005	1
17	A130010J15Rik		0.261199	0.388516	0.539185	SPIKE	20	15	5	18	6	6.67	0.5		0.00264746	0.00368378	7.97678	1
38	Acan		0.261173	0.388516	0.539185	SPIKE	18	4.5	13.5	6	18	6	0.5		0.00264979	0.00368378	7.98382	1
209	Atxn7l3		0.261386	0.388516	0.539185	NSPIKE	18	8.62	16.5	11.5	22	13.5	0.75		0.00263126	0.00368052	7.92798	1
302	Ccdc68		0.261199	0.388516	0.539185	SPIKE	32	24	8	18	6	10.67	0.5		0.00264746	0.00368378	7.97678	1
591	Entpd6		0.261357	0.388516	0.539185	SPIKE	32	18.67	4.67	14	3.5	8	0.25		0.00263376	0.00368176	7.93553	1
828	Gtf3c4		0.261173	0.388516	0.539185	SPIKE	19	11.08	0.4	14	0.5	4.75	0.75		0.00264979	0.00368378	7.98382	1
988	Letm2		0.261074	0.388516	0.539185	ACOS	31	25.83	5.17	20	4	31	0.67		0.00265846	0.00369357	8.00995	1
1027	Lrrc14		0.261173	0.388516	0.539185	SPIKE	26	2.17	13.54	2	12.5	6.5	0.75		0.00264979	0.00368378	7.98382	1
1223	Nat2		0.261199	0.388516	0.539185	SPIKE	18	6	15	8	20	6	0.5		0.00264746	0.00368378	7.97678	1
1252	Nicn1		0.261173	0.388516	0.539185	SPIKE	35	26.25	8.75	18	6	11.67	0.5		0.00264979	0.00368378	7.98382	1
1505	Psd3		0.260795	0.388946	0.539185	ACOS	32	21.33	24	16	18	32	0.92		0.00268294	0.0037253	8.08368	1
1512	Ptprd		0.260218	0.389266	0.539185	SPIKE	30	10	23.12	8	18.5	7.5	0.75		0.00273436	0.00379207	8.23864	1
1534	Rab3d		0.260199	0.389266	0.539185	ACOS	33	16.5	11	12	8	33	0.17		0.0027361	0.00379217	8.24388	1
1586	Rgs19		0.261173	0.388516	0.539185	SPIKE	32	26.67	12.67	20	9.5	8	0.25		0.00264979	0.00368378	7.98382	1
2094	Usp29		0.260154	0.389266	0.539185	NSPIKE	23	16.77	3.83	17.5	4	17.25	0.75		0.0027401	0.0037954	8.25593	1
2224	Zfp638		0.26064	0.389266	0.539185	NSPIKE	28	14	0	12	0	18.67	0.5		0.00269672	0.00374215	8.12521	1
2247	Zfp932		0.261173	0.388516	0.539185	SPIKE	21	10.5	19.69	12	22.5	5.25	0.75		0.00264979	0.00368378	7.98382	1
901	Insr		0.259971	0.390496	0.540559	SPIKE	18	10.5	1.5	14	2	4.5	0.5		0.00275662	0.00381596	8.3057	1
498	Dis3		0.259916	0.391306	0.540692	SPIKE	18	13.5	4.5	18	6	3	0.5		0.00276162	0.00382055	8.32076	1
649	Fbxo46		0.259635	0.391306	0.540692	ACOS	30	27.5	2.5	22	2	30	0.83		0.00278721	0.00385126	8.39787	1
832	Haus1		0.259654	0.391306	0.540692	SPIKE	24	6	16.5	6	16.5	6	0.75		0.00278545	0.00385117	8.39255	1
175	Arpp21		0.259554	0.393556	0.542153	NSPIKE	27	22.5	9	20	8	20.25	0.5		0.00279458	0.00385208	8.42006	1
1113	Mfap4		0.259554	0.393556	0.542153	NSPIKE	18	2.62	10.5	3.5	14	13.5	0.75		0.00279458	0.00385208	8.42006	1
1493	Prkn		0.259577	0.393556	0.542153	NSPIKE	19	9.5	0	12	0	12.67	0.5		0.00279251	0.00385208	8.41383	1
2018	Trim46		0.259577	0.393556	0.542153	NSPIKE	35	20.42	2.92	14	2	23.33	0.5		0.00279251	0.00385208	8.41383	1
2208	Zfp445		0.259526	0.393556	0.542153	NSPIKE	32	16	0	12	0	21.33	0.5		0.00279713	0.00385326	8.42776	1
1239	Neb		0.259323	0.397646	0.547456	SPIKE	22	5.5	15.12	6	16.5	5.5	0.75		0.00281581	0.00387664	8.48403	1
6	1700029J07Rik		0.258406	0.403796	0.548612	SPIKE	18	10.5	1.5	14	2	4.5	0.5		0.00290162	0.00394461	8.74258	1
15	6820408C15Rik		0.258777	0.399666	0.548612	SPIKE	28	21	8.75	18	7.5	7	0.25		0.00286664	0.00394185	8.63719	1
271	Carf		0.258406	0.403796	0.548612	SPIKE	32	8	22	6	16.5	8	0.75		0.00290162	0.00394461	8.74258	1
274	Carmil3		0.258406	0.403796	0.548612	SPIKE	18	1.5	11.62	2	15.5	4.5	0.25		0.00290162	0.00394461	8.74258	1
290	Ccdc114		0.258406	0.403796	0.548612	SPIKE	26	4.33	17.33	4	16	4.33	0.5		0.00290162	0.00394461	8.74258	1
363	Cfb		0.258518	0.402886	0.548612	ACOS	35	11.67	8.75	8	6	35	0.08		0.00289097	0.00394461	8.71049	1
525	Dok3		0.258406	0.403796	0.548612	SPIKE	18	1.5	11.62	2	15.5	4.5	0.25		0.00290162	0.00394461	8.74258	1
561	Ehbp1l1		0.258406	0.403796	0.548612	SPIKE	35	0	19.69	0	13.5	8.75	0.25		0.00290162	0.00394461	8.74258	1
758	Gm32547		0.258406	0.403796	0.548612	SPIKE	18	6	16.12	8	21.5	4.5	0.25		0.00290162	0.00394461	8.74258	1
771	Gm39124		0.258406	0.403796	0.548612	SPIKE	19	15.83	5.15	20	6.5	4.75	0.75		0.00290162	0.00394461	8.74258	1
778	Gm52298		0.258406	0.403796	0.548612	SPIKE	35	2.92	20.42	2	14	8.75	0.5		0.00290162	0.00394461	8.74258	1
857	Hoxa3		0.258406	0.403796	0.548612	SPIKE	18	1.5	11.62	2	15.5	4.5	0.25		0.00290162	0.00394461	8.74258	1
948	Kctd18		0.258406	0.403796	0.548612	SPIKE	18	1.5	11.62	2	15.5	4.5	0.25		0.00290162	0.00394461	8.74258	1
1115	Mfsd10		0.258443	0.403676	0.548612	SPIKE	21	0	9.19	0	10.5	5.25	0.75		0.00289806	0.00394461	8.73185	1
1159	Mpp6		0.258816	0.399666	0.548612	SPIKE	30	15	28.12	12	22.5	7.5	0.75		0.00286298	0.0039392	8.62615	1
1247	Nexn		0.258406	0.403796	0.548612	SPIKE	18	10.5	1.5	14	2	4.5	0.5		0.00290162	0.00394461	8.74258	1
1262	Nmnat3		0.258406	0.403796	0.548612	SPIKE	32	8	22	6	16.5	8	0.75		0.00290162	0.00394461	8.74258	1
1297	Odf2l		0.258406	0.403796	0.548612	SPIKE	19	15.83	5.15	20	6.5	4.75	0.75		0.00290162	0.00394461	8.74258	1
1328	Parp14		0.258406	0.403796	0.548612	SPIKE	18	7.5	15.38	10	20.5	4.5	0.75		0.00290162	0.00394461	8.74258	1
1611	Rnf121		0.258274	0.403796	0.548612	NSPIKE	18	11.62	1.5	15.5	2	13.5	0.75		0.00291414	0.00395926	8.7803	1
2068	Uaca		0.258406	0.403796	0.548612	SPIKE	19	15.83	5.15	20	6.5	4.75	0.75		0.00290162	0.00394461	8.74258	1
2113	Vill		0.258406	0.403796	0.548612	SPIKE	34	28.33	9.21	20	6.5	8.5	0.75		0.00290162	0.00394461	8.74258	1
713	Gcfc2		0.257937	0.405266	0.549952	ACOS	18	12	10.5	16	14	18	0.08		0.0029464	0.00399831	8.8775	1
2010	Trank1		0.25805	0.405266	0.549952	SPIKE	18	16.5	6.38	22	8.5	4.5	0.75		0.0029355	0.0039859	8.84466	1
18	A4galt		0.256776	0.412856	0.550394	SPIKE	28	21	8.75	18	7.5	7	0.25		0.00305982	0.00407938	9.21923	1
45	Acsm1		0.256776	0.412856	0.550394	SPIKE	20	11.67	1.67	14	2	6.67	0.5		0.00305982	0.00407938	9.21923	1
219	Bbs9		0.257274	0.408056	0.550394	SPIKE	34	28.33	11.33	20	8	5.67	0.5		0.00301068	0.00406854	9.07119	1
370	Chfr		0.256917	0.412776	0.550394	SPIKE	30	5	20	4	16	7.5	0.5		0.00304581	0.00407938	9.17702	1
483	Dennd6b		0.256966	0.412776	0.550394	SPIKE	24	6	18	6	18	6	0.5		0.00304097	0.00407938	9.16243	1
505	Dlgap2		0.257274	0.408056	0.550394	SPIKE	24	12	0	12	0	8	0.5		0.00301068	0.00406854	9.07119	1
629	Fam161a		0.257274	0.408056	0.550394	SPIKE	30	20	5	16	4	7.5	0.5		0.00301068	0.00406854	9.07119	1
669	Flrt2		0.256932	0.412776	0.550394	ACOS	19	17.42	11.08	22	14	19	0.33		0.00304433	0.00407938	9.17255	1
705	Galnt13		0.256776	0.412856	0.550394	SPIKE	24	8	20	8	20	4	0.5		0.00305982	0.00407938	9.21923	1
710	Gata4		0.256776	0.412856	0.550394	SPIKE	20	5	13.75	6	16.5	5	0.75		0.00305982	0.00407938	9.21923	1
935	Katnb1		0.257458	0.407916	0.550394	NSPIKE	21	15.31	3.5	17.5	4	15.75	0.75		0.00299269	0.0040587	9.01697	1
955	Khdrbs2		0.256917	0.412776	0.550394	SPIKE	21	7	16.19	8	18.5	5.25	0.75		0.00304581	0.00407938	9.17702	1
1216	Nadsyn1		0.256776	0.412856	0.550394	SPIKE	24	8	20	8	20	4	0.5		0.00305982	0.00407938	9.21923	1
1256	Nkx2-2		0.256776	0.412856	0.550394	SPIKE	20	5	13.75	6	16.5	5	0.75		0.00305982	0.00407938	9.21923	1
1300	Opcml		0.257274	0.408056	0.550394	SPIKE	35	32.08	14.58	22	10	5.83	0.5		0.00301068	0.00406854	9.07119	1
1340	Pced1b		0.256776	0.412856	0.550394	SPIKE	28	14	0	12	0	9.33	0.5		0.00305982	0.00407938	9.21923	1
1371	Pgap2		0.256994	0.412776	0.550394	SPIKE	26	4.33	17.33	4	16	6.5	0.5		0.00303825	0.00407938	9.15424	1
1439	Pms1		0.256776	0.412856	0.550394	SPIKE	27	18	4.5	16	4	9	0.5		0.00305982	0.00407938	9.21923	1
1441	Pnldc1		0.256776	0.412856	0.550394	SPIKE	20	8.33	17.08	10	20.5	5	0.75		0.00305982	0.00407938	9.21923	1
1443	Pnpla7		0.256776	0.412856	0.550394	SPIKE	28	0	14	0	12	7	0.5		0.00305982	0.00407938	9.21923	1
1560	Rbbp5		0.256775	0.412856	0.550394	NSPIKE	24	10	22	10	22	16	0.5		0.00305998	0.00407938	9.21973	1
1715	Sgtb		0.256776	0.412856	0.550394	SPIKE	24	8	20	8	20	4	0.5		0.00305982	0.00407938	9.21923	1
1729	Sipa1l3		0.257204	0.408076	0.550394	SPIKE	18	4.5	12.38	6	16.5	4.5	0.75		0.00301753	0.00407537	9.09181	1
1747	Slc25a38		0.257274	0.408056	0.550394	SPIKE	18	10.5	1.5	14	2	3	0.5		0.00301068	0.00406854	9.07119	1
1751	Slc29a3		0.256776	0.412856	0.550394	SPIKE	27	18	4.5	16	4	9	0.5		0.00305982	0.00407938	9.21923	1
1845	St18		0.256781	0.412856	0.550394	SPIKE	18	0	7.88	0	10.5	4.5	0.75		0.00305933	0.00407938	9.21775	1
1859	Stk36		0.256776	0.412856	0.550394	SPIKE	32	0	16	0	12	5.33	0.5		0.00305982	0.00407938	9.21923	1
1997	Top2a		0.257274	0.408056	0.550394	SPIKE	24	14	0.5	14	0.5	6	0.75		0.00301068	0.00406854	9.07119	1
2100	Usp54		0.256965	0.412776	0.550394	SPIKE	18	13.5	5.62	18	7.5	4.5	0.25		0.00304113	0.00407938	9.16293	1
2248	Zfp942		0.256776	0.412856	0.550394	SPIKE	27	18	4.5	16	4	9	0.5		0.00305982	0.00407938	9.21923	1
951	Kdm2b		0.256411	0.414076	0.550941	NSPIKE	19	15.44	4.75	19.5	6	14.25	0.75		0.0030963	0.00412296	9.32916	1
1182	Mtmr1		0.256166	0.414236	0.550941	ACOS	18	7.5	0	10	0	18	0.42		0.00312103	0.00415102	9.40366	1
1626	Robo1		0.256281	0.414076	0.550941	ACOS	35	0	29.17	0	20	35	0.17		0.00310942	0.00413801	9.36869	1
2147	Xpnpep1		0.256411	0.414076	0.550941	NSPIKE	22	16.96	7.33	18.5	8	16.5	0.25		0.0030963	0.00412296	9.32916	1
900	Inpp5e		0.255883	0.415526	0.551366	NSPIKE	24	16	4	16	4	18	0.5		0.00314979	0.00417949	9.49032	1
1433	Pls3		0.255883	0.415526	0.551366	NSPIKE	24	12.5	2	12.5	2	18	0.25		0.00314979	0.00417949	9.49032	1
2056	Ttll5		0.255883	0.415526	0.551366	NSPIKE	24	12.5	2	12.5	2	18	0.25		0.00314979	0.00417949	9.49032	1
2220	Zfp605		0.255934	0.415526	0.551366	NSPIKE	20	0.42	11.67	0.5	14	15	0.25		0.00314457	0.00417949	9.47459	1
1393	Pik3c3		0.255162	0.422146	0.55852	NSPIKE	27	22.5	9	20	8	20.25	0.5		0.00322415	0.00426571	9.71437	1
1720	Sh3gl3		0.255162	0.422146	0.55852	NSPIKE	25	11.98	22.92	11.5	22	18.75	0.75		0.00322415	0.00426571	9.71437	1
1787	Smarcd3		0.255175	0.422146	0.55852	SPIKE	29	4.83	19.33	4	16	4.83	0.5		0.00322285	0.00426571	9.71045	1
1940	Tgif1		0.255383	0.422146	0.55852	ACOS	27	6.75	6.75	6	6	27	0		0.00320121	0.00424525	9.64525	1
2073	Ube3b		0.255177	0.422146	0.55852	SPIKE	32	0	16	0	12	5.33	0.5		0.00322258	0.00426571	9.70962	1
230	Bdnf		0.254535	0.426006	0.562318	SPIKE	20	13.33	2.08	16	2.5	5	0.75		0.00329017	0.00434799	9.91327	1
790	Gng12		0.254374	0.426006	0.562318	NSPIKE	32	21.33	5.33	16	4	26.67	0.5		0.0033073	0.00436555	9.96488	1
812	Gria2		0.254374	0.426006	0.562318	NSPIKE	19	15.83	6.33	20	8	15.83	0.5		0.0033073	0.00436555	9.96488	1
1111	Mettl16		0.254623	0.426006	0.562318	NSPIKE	34	19.83	2.83	14	2	22.67	0.5		0.00328075	0.00433808	9.88491	1
1041	Lrrfip1		0.254189	0.427566	0.564049	SPIKE	18	13.5	4.5	18	6	3	0.5		0.00332704	0.00438907	10.0244	1
860	Hpgds		0.2541	0.428626	0.56512	SPIKE	18	1.5	11.62	2	15.5	4.5	0.25		0.00333652	0.00439902	10.0529	1
119	Anks1		0.253376	0.432216	0.56581	NSPIKE	33	13.75	30.25	10	22	24.75	0.5		0.00341521	0.00448715	10.29	1
312	Ccser2		0.253666	0.432016	0.56581	ACOS	29	14.5	7.25	12	6	29	0.25		0.00338348	0.0044506	10.1944	1
610	Etfbkmt		0.252815	0.432386	0.56581	SPIKE	21	14	3.5	16	4	7	0.5		0.00347727	0.0045529	10.477	1
736	Gm13232		0.252678	0.432386	0.56581	ACOS	24	20	10	20	10	24	0.42		0.00349256	0.00457028	10.5231	1
764	Gm33989		0.253336	0.432216	0.56581	SPIKE	30	10	23.12	8	18.5	7.5	0.75		0.00341966	0.00449041	10.3034	1
923	Itgb4		0.252815	0.432386	0.56581	SPIKE	32	29.33	15.33	22	11.5	8	0.25		0.00347727	0.0045529	10.477	1
945	Kcnt2		0.252815	0.432386	0.56581	SPIKE	26	2.17	16.79	2	15.5	6.5	0.25		0.00347727	0.0045529	10.477	1
1294	Nxpe4		0.253898	0.429756	0.56581	ACOS	34	19.83	14.17	14	10	34	0.17		0.00335833	0.00442265	10.1187	1
1313	Pacs2		0.253222	0.432216	0.56581	SPIKE	24	4	17.5	4	17.5	6	0.25		0.00343219	0.00450165	10.3412	1
1875	Sybu		0.254008	0.429656	0.56581	SPIKE	34	28.33	11.33	20	8	5.67	0.5		0.00334648	0.0044096	10.083	1
2008	Traf3ip1		0.253591	0.432066	0.56581	NSPIKE	18	12.38	4.5	16.5	6	13.5	0.25		0.00339165	0.00445877	10.219	1
2011	Trappc12		0.253837	0.429906	0.56581	SPIKE	20	15	5	18	6	6.67	0.5		0.003365	0.00442887	10.1388	1
2232	Zfp692		0.253297	0.432216	0.56581	SPIKE	20	15	3.75	18	4.5	5	0.75		0.0034239	0.00449338	10.3162	1
27	Abcf2		0.252484	0.437086	0.571632	ACOS	28	9.33	9.33	8	8	28	0		0.00351445	0.00459628	10.589	1
63	Adgb		0.25049	0.447576	0.572826	NSPIKE	24	17.5	4	17.5	4	18	0.75		0.00374554	0.00480723	11.2853	1
104	Ank1		0.250998	0.447066	0.572826	NSPIKE	27	11.81	0	10.5	0	20.25	0.25		0.00368536	0.00476111	11.104	1
202	Atp8a1		0.252066	0.442146	0.572826	NSPIKE	22	19.71	7.33	21.5	8	16.5	0.75		0.0035617	0.0046554	10.7314	1
242	Braf		0.250533	0.447576	0.572826	SPIKE	23	3.83	16.77	4	17.5	5.75	0.25		0.00374033	0.00480723	11.2696	1
325	Cdhr3		0.251515	0.446166	0.572826	SPIKE	34	28.33	11.33	20	8	8.5	0.5		0.00362507	0.00470575	10.9223	1
327	Cdk8		0.250402	0.447576	0.572826	NSPIKE	18	8.62	16.5	11.5	22	13.5	0.75		0.00375606	0.00481801	11.317	1
436	Crtac1		0.250292	0.447576	0.572826	SPIKE	30	15	28.12	12	22.5	7.5	0.75		0.00376915	0.00482391	11.3564	1
475	Ddx31		0.251515	0.446166	0.572826	SPIKE	18	10.5	1.5	14	2	4.5	0.5		0.00362507	0.00470575	10.9223	1
544	Dzip1l		0.251515	0.446166	0.572826	SPIKE	19	15.83	5.15	20	6.5	4.75	0.75		0.00362507	0.00470575	10.9223	1
545	E130308A19Rik		0.250292	0.447576	0.572826	SPIKE	24	8	20	8	20	4	0.5		0.00376915	0.00482391	11.3564	1
584	Engase		0.250998	0.447066	0.572826	NSPIKE	32	0	16	0	12	21.33	0.5		0.00368536	0.00476111	11.104	1
630	Fam163a		0.251515	0.446166	0.572826	SPIKE	18	13.5	5.62	18	7.5	4.5	0.25		0.00362507	0.00470575	10.9223	1
671	Fmnl1		0.250998	0.447066	0.572826	NSPIKE	32	16.67	2.67	12.5	2	24	0.25		0.00368536	0.00476111	11.104	1
685	Fpgt		0.251515	0.446166	0.572826	SPIKE	30	2.5	17.5	2	14	5	0.5		0.00362507	0.00470575	10.9223	1
693	Frmpd4		0.250504	0.447576	0.572826	SPIKE	24	12	0	12	0	8	0.5		0.00374387	0.00480723	11.2803	1
718	Ggps1		0.251724	0.445956	0.572826	ACOS	27	6.75	4.5	6	4	27	0.08		0.0036009	0.00469854	10.8495	1
763	Gm33583		0.251515	0.446166	0.572826	SPIKE	18	4.5	12.38	6	16.5	4.5	0.75		0.00362507	0.00470575	10.9223	1
821	Grk6		0.250504	0.447576	0.572826	SPIKE	24	14	0.5	14	0.5	6	0.75		0.00374387	0.00480723	11.2803	1
956	Khnyn		0.250998	0.447066	0.572826	NSPIKE	32	16.67	2.67	12.5	2	24	0.25		0.00368536	0.00476111	11.104	1
973	Kmt5c		0.250952	0.447076	0.572826	SPIKE	34	14.17	33.29	10	23.5	8.5	0.25		0.00369075	0.00476111	11.1202	1
1261	Nme6		0.250695	0.447286	0.572826	SPIKE	32	8	26	6	19.5	8	0.25		0.00372117	0.00479763	11.2119	1
1327	Parp11		0.250998	0.447066	0.572826	NSPIKE	18	15	6	20	8	12	0.5		0.00368536	0.00476111	11.104	1
1348	Pdcd2l		0.251515	0.446166	0.572826	SPIKE	32	8	26	6	19.5	8	0.25		0.00362507	0.00470575	10.9223	1
1381	Phf23		0.252041	0.442146	0.572826	NSPIKE	25	11.98	22.92	11.5	22	18.75	0.75		0.00356455	0.00465645	10.74	1
1451	Pomt1		0.250504	0.447576	0.572826	SPIKE	32	5.33	21.33	4	16	5.33	0.5		0.00374387	0.00480723	11.2803	1
1480	Ppp4r1		0.250952	0.447076	0.572826	SPIKE	23	5.75	15.81	6	16.5	5.75	0.75		0.00369075	0.00476111	11.1202	1
1542	Rad51d		0.251515	0.446166	0.572826	SPIKE	18	1.5	11.62	2	15.5	4.5	0.25		0.00362507	0.00470575	10.9223	1
1643	Rsph1		0.250504	0.447576	0.572826	SPIKE	32	8	24	6	18	8	0.5		0.00374387	0.00480723	11.2803	1
1727	Sipa1		0.250504	0.447576	0.572826	SPIKE	30	20	5	16	4	7.5	0.5		0.00374387	0.00480723	11.2803	1
1826	Speg		0.250292	0.447576	0.572826	SPIKE	24	4	16	4	16	6	0.5		0.00376915	0.00482391	11.3564	1
1855	Stat1		0.25097	0.447076	0.572826	SPIKE	24	8	20	8	20	4	0.5		0.00368865	0.00476111	11.1139	1
1873	Supt20		0.250504	0.447576	0.572826	SPIKE	20	18.33	7.08	22	8.5	5	0.75		0.00374387	0.00480723	11.2803	1
1905	Tbck		0.250998	0.447066	0.572826	NSPIKE	22	11	0	12	0	16.5	0.5		0.00368536	0.00476111	11.104	1
2005	Tpsg1		0.250998	0.447066	0.572826	NSPIKE	32	16.67	2.67	12.5	2	24	0.25		0.00368536	0.00476111	11.104	1
2051	Ttc9c		0.250998	0.447066	0.572826	NSPIKE	32	8	24	6	18	21.33	0.5		0.00368536	0.00476111	11.104	1
2058	Ttll9		0.251515	0.446166	0.572826	SPIKE	18	1.5	11.62	2	15.5	4.5	0.25		0.00362507	0.00470575	10.9223	1
2176	Zfp112		0.252006	0.442326	0.572826	ACOS	32	18.67	5.33	14	4	32	0.42		0.00356865	0.00465913	10.7523	1
2180	Zfp143		0.250292	0.447576	0.572826	SPIKE	24	4	16	4	16	6	0.5		0.00376915	0.00482391	11.3564	1
163	Arhgef28		0.250149	0.452935	0.579034	ACOS	35	14.58	11.67	10	8	35	0.08		0.00378638	0.00484324	11.4084	1
1854	Stard3		0.25008	0.452935	0.579034	NSPIKE	33	19.25	2.75	14	2	24.75	0.5		0.00379466	0.0048511	11.4333	1
412	Colec11		0.249644	0.456085	0.579476	SPIKE	27	18	4.5	16	4	9	0.5		0.00384765	0.00488861	11.593	1
422	Cplane1		0.249644	0.456085	0.579476	SPIKE	20	1.67	10.42	2	12.5	5	0.75		0.00384765	0.00488861	11.593	1
529	Dph7		0.249644	0.456085	0.579476	SPIKE	27	18	4.5	16	4	9	0.5		0.00384765	0.00488861	11.593	1
849	Hmcn1		0.249644	0.456085	0.579476	SPIKE	20	6.67	15.42	8	18.5	5	0.75		0.00384765	0.00488861	11.593	1
858	Hp		0.249644	0.456085	0.579476	SPIKE	24	10	20.5	10	20.5	6	0.75		0.00384765	0.00488861	11.593	1
1124	Mical1		0.249644	0.456085	0.579476	SPIKE	20	10	18.75	12	22.5	5	0.75		0.00384765	0.00488861	11.593	1
1301	Osbp2		0.249644	0.456085	0.579476	SPIKE	20	13.33	2.08	16	2.5	5	0.75		0.00384765	0.00488861	11.593	1
1419	Plekha4		0.249644	0.456085	0.579476	SPIKE	27	18	4.5	16	4	9	0.5		0.00384765	0.00488861	11.593	1
1426	Plgrkt		0.24968	0.455255	0.579476	ACOS	20	5	6.67	6	8	20	0.92		0.00384322	0.00488861	11.5796	1
1665	Satb2		0.249644	0.456085	0.579476	SPIKE	27	18	4.5	16	4	9	0.5		0.00384765	0.00488861	11.593	1
1816	Spag1		0.249644	0.456085	0.579476	SPIKE	28	21	8.75	18	7.5	7	0.25		0.00384765	0.00488861	11.593	1
906	Iqank1		0.249271	0.457835	0.580402	NSPIKE	20	0	10	0	12	13.33	0.5		0.00389344	0.00493574	11.7309	1
1219	Napepld		0.249271	0.457835	0.580402	NSPIKE	20	16.25	5	19.5	6	15	0.75		0.00389344	0.00493574	11.7309	1
2107	Vangl1		0.249271	0.457835	0.580402	NSPIKE	20	0	10	0	12	13.33	0.5		0.00389344	0.00493574	11.7309	1
2195	Zfp30		0.249271	0.457835	0.580402	NSPIKE	20	16.25	5	19.5	6	15	0.75		0.00389344	0.00493574	11.7309	1
7	1810010H24Rik		0.247213	0.471655	0.58044	SPIKE	22	5.5	16.5	6	18	3.67	0.5		0.00415507	0.0051144	12.5192	1
16	9430038I01Rik		0.247273	0.471485	0.58044	SPIKE	24	12	0	12	0	8	0.5		0.00414712	0.0051144	12.4953	1
55	Adamtsl3		0.247273	0.471485	0.58044	SPIKE	32	16	0	12	0	8	0.5		0.00414712	0.0051144	12.4953	1
106	Ank3		0.248968	0.461025	0.58044	SPIKE	20	13.33	4.58	16	5.5	5	0.25		0.00393102	0.00498061	11.8442	1
125	Ano5		0.248636	0.461395	0.58044	ACOS	24	14	22	14	22	24	0.67		0.00397257	0.00502485	11.9694	1
127	Ano7		0.247273	0.471485	0.58044	SPIKE	34	28.33	11.33	20	8	5.67	0.5		0.00414712	0.0051144	12.4953	1
250	C5ar1		0.247273	0.471485	0.58044	SPIKE	30	20	5	16	4	7.5	0.5		0.00414712	0.0051144	12.4953	1
308	Ccna1		0.247273	0.471485	0.58044	SPIKE	30	20	5	16	4	7.5	0.5		0.00414712	0.0051144	12.4953	1
313	Cd36		0.247273	0.471485	0.58044	SPIKE	30	20	5	16	4	7.5	0.5		0.00414712	0.0051144	12.4953	1
345	Cep41		0.247213	0.471655	0.58044	SPIKE	25	0	10.94	0	10.5	6.25	0.75		0.00415507	0.0051144	12.5192	1
388	Clhc1		0.247273	0.471485	0.58044	SPIKE	34	28.33	11.33	20	8	5.67	0.5		0.00414712	0.0051144	12.4953	1
408	Col25a1		0.247273	0.471485	0.58044	SPIKE	32	8	24	6	18	8	0.5		0.00414712	0.0051144	12.4953	1
431	Crb1		0.248354	0.461575	0.58044	SPIKE	32	8	24	6	18	10.67	0.5		0.00400816	0.00506423	12.0766	1
432	Creb3l4		0.247273	0.471485	0.58044	SPIKE	35	32.08	14.58	22	10	5.83	0.5		0.00414712	0.0051144	12.4953	1
440	Csf3r		0.247273	0.471485	0.58044	SPIKE	30	20	5	16	4	7.5	0.5		0.00414712	0.0051144	12.4953	1
455	Cyb5rl		0.247273	0.471485	0.58044	SPIKE	24	12	0	12	0	8	0.5		0.00414712	0.0051144	12.4953	1
462	D030055H07Rik		0.247273	0.471485	0.58044	SPIKE	32	16	0	12	0	8	0.5		0.00414712	0.0051144	12.4953	1
472	Dclre1a		0.247273	0.471485	0.58044	SPIKE	32	16	0	12	0	8	0.5		0.00414712	0.0051144	12.4953	1
586	Enox1		0.248939	0.461025	0.58044	NSPIKE	19	17.02	6.33	21.5	8	14.25	0.75		0.00393463	0.00498241	11.855	1
618	Exosc10		0.247207	0.471655	0.58044	NSPIKE	33	24.06	5.5	17.5	4	24.75	0.75		0.00415587	0.0051144	12.5216	1
687	Frem2		0.247273	0.471485	0.58044	SPIKE	24	12	0	12	0	8	0.5		0.00414712	0.0051144	12.4953	1
817	Grik4		0.248838	0.461165	0.58044	SPIKE	27	18	6.19	16	5.5	6.75	0.25		0.00394726	0.00499561	11.8931	1
870	Htr7		0.247273	0.471485	0.58044	SPIKE	30	20	5	16	4	7.5	0.5		0.00414712	0.0051144	12.4953	1
875	Icam2		0.247273	0.471485	0.58044	SPIKE	30	20	5	16	4	7.5	0.5		0.00414712	0.0051144	12.4953	1
893	Il1b		0.247273	0.471485	0.58044	SPIKE	30	20	5	16	4	7.5	0.5		0.00414712	0.0051144	12.4953	1
914	Irgc1		0.247273	0.471485	0.58044	SPIKE	30	20	5	16	4	7.5	0.5		0.00414712	0.0051144	12.4953	1
915	Irx4		0.247273	0.471485	0.58044	SPIKE	34	28.33	11.33	20	8	5.67	0.5		0.00414712	0.0051144	12.4953	1
927	Jade3		0.247273	0.471485	0.58044	SPIKE	34	28.33	11.33	20	8	5.67	0.5		0.00414712	0.0051144	12.4953	1
987	Lef1		0.247273	0.471485	0.58044	SPIKE	30	20	5	16	4	7.5	0.5		0.00414712	0.0051144	12.4953	1
991	Lgi2		0.247273	0.471485	0.58044	SPIKE	32	24	8	18	6	8	0.5		0.00414712	0.0051144	12.4953	1
1121	Mgmt		0.247273	0.471485	0.58044	SPIKE	24	12	0	12	0	8	0.5		0.00414712	0.0051144	12.4953	1
1127	Mid1		0.247273	0.471485	0.58044	SPIKE	24	12	0	12	0	8	0.5		0.00414712	0.0051144	12.4953	1
1285	Ntrk3		0.247207	0.471655	0.58044	NSPIKE	33	19.94	5.5	14.5	4	24.75	0.25		0.00415587	0.0051144	12.5216	1
1288	Nudt5		0.248307	0.461575	0.58044	SPIKE	21	10.5	19.69	12	22.5	5.25	0.75		0.00401404	0.00506603	12.0943	1
1469	Ppm1k		0.247316	0.469965	0.58044	ACOS	32	5.33	29.33	4	22	32	0.25		0.00414162	0.0051144	12.4787	1
1503	Prtn3		0.247273	0.471485	0.58044	SPIKE	30	20	5	16	4	7.5	0.5		0.00414712	0.0051144	12.4953	1
1685	Sema5b		0.247273	0.471485	0.58044	SPIKE	32	8	24	6	18	8	0.5		0.00414712	0.0051144	12.4953	1
1717	Sh2d3c		0.247316	0.469965	0.58044	ACOS	32	21.33	2.67	16	2	32	0.58		0.00414162	0.0051144	12.4787	1
1740	Slc18b1		0.247273	0.471485	0.58044	SPIKE	34	28.33	11.33	20	8	5.67	0.5		0.00414712	0.0051144	12.4953	1
1782	Slco2b1		0.247273	0.471485	0.58044	SPIKE	32	8	24	6	18	8	0.5		0.00414712	0.0051144	12.4953	1
1822	Spata3		0.247273	0.471485	0.58044	SPIKE	34	28.33	11.33	20	8	5.67	0.5		0.00414712	0.0051144	12.4953	1
1824	Spatc1		0.247273	0.471485	0.58044	SPIKE	34	28.33	11.33	20	8	5.67	0.5		0.00414712	0.0051144	12.4953	1
1916	Tdrd12		0.247273	0.471485	0.58044	SPIKE	32	16	0	12	0	8	0.5		0.00414712	0.0051144	12.4953	1
[truncated: 437 more rows]
