# Supplementary material for: Hypothalamic deiodinase type-3 establishes the period of circannual interval timing in mammals
Source: bioRxiv preprint, doi:10.1101/2025.04.22.650143, version 3 (2025-09-12)
Supplement: Dataset S4 [file 650143_file09.xlsx]

## Sheet: EdgeR
	logFC.Group12wk	logFC.Group16wk	logFC.Group20wk	logFC.Group24wk	logFC.Group28wk	logFC.Group32wk	logFC.Group4wk	logFC.Group8wk	logCPM	F	PValue	FDR
Neb	1.14055	3.00303	0	1.24234	12.7658	0	0	0	4.59167	20.5545	9.60613e-11	2.09615e-06
Pde1c	0.148394	0.905764	7.39463	3.27068	2.28238	-0.87626	-0.87626	1.38717	0.514042	14.2549	2.24334e-10	2.44759e-06
Ttn	-3.52978	1.9243	-3.52978	-3.52978	9.38461	-3.52978	0.938699	-3.52978	4.7519	14.828	6.2812e-09	4.56874e-05
Myh4	-0.701426	-0.893662	1.22657	-0.391359	6.23509	-1.83601	-0.746589	0.0557644	0.178781	9.73781	3.44546e-08	0.000187958
Zfp991	0	4.11058	0	1.08285	6.13735	2.52828	0	1.60879	-0.215294	10.8294	8.76136e-08	0.000382363
Tnnt3	-3.83315	-4.83153	-5.78532	-5.78532	4.44856	-5.78532	-4.68572	0.950344	2.2186	9.8642	1.17471e-07	0.000427223
Zscan20	-4.48106	-3.5419	-2.60956	-4.48106	-4.48106	-4.48106	-3.39446	-4.48106	-0.723952	10.9874	2.14786e-07	0.000669548
Zfp994	-0.978409	1.62983	-0.978409	0.952979	3.5714	1.547	4.59712	0.630422	-0.333354	8.69248	3.05345e-07	0.000832865
Sema6c	0.261044	0.0656963	-0.872551	0.59739	4.10381	-0.872551	-0.872551	0.610613	-0.663537	8.2407	1.09737e-06	0.00266064
F830045P16Rik	0.259858	0.0665601	-0.874394	-0.874394	0.151288	3.99838	-0.874394	-0.874394	-0.793607	8.58866	1.3534e-06	0.00295326
Etv4	0.148036	-0.871494	-0.871494	0.231491	4.06786	1.65886	2.6428	-0.871494	-0.601239	7.96122	1.64966e-06	0.00311542
Mlip	-0.962023	-1.98349	-1.98349	4.45617	-1.98349	0.549903	2.64656	-1.98349	-0.0205945	8.35017	1.85409e-06	0.00311542
Lars2	0.535448	0.863312	0.939229	0.170686	3.49589	0.423422	0.482001	0.28117	7.48061	7.04165	1.86843e-06	0.00311542
Gm20515	-3.53303	-4.9016	-3.0296	-3.79903	-3.76007	-4.9016	1.35956	-4.9016	-0.0871505	7.8313	1.9988e-06	0.00311542
Cplane1	-0.594925	3.13529	8.05602	3.62806	-0.592442	-1.61886	3.1736	-1.61886	0.583354	7.4292	2.19029e-06	0.00318629
Efcab6	1.13396	0.939742	0	0.580273	4.45374	2.53386	0	1.62536	-0.751755	7.70183	2.42403e-06	0.00330592
Slc26a1	1.1331	0	0	0	4.51681	0	4.74261	0	-0.579292	9.01062	4.9598e-06	0.00614625
Platr25	-0.979141	-0.979141	-0.979141	4.21158	0.160649	-0.979141	4.81403	0.646757	-0.179584	7.61238	5.07e-06	0.00614625
Ccdc15	-1.03327	-2.37772	-3.31015	1.83252	-2.17046	-3.31015	-3.31015	-3.31015	-0.469344	7.45461	6.32842e-06	0.00700585
Acsm3	-3.64026	-2.69788	-1.76526	-3.05784	-2.61382	-3.64026	-3.64026	-3.64026	-0.839742	7.43209	6.5332e-06	0.00700585
Wiz	-3.70049	-2.69437	-11.0375	-5.72695	-5.95475	-11.0375	-11.0375	-11.0375	3.06674	7.40985	6.74226e-06	0.00700585
Zfp217	3.58699	0.0638108	0.995549	4.53684	-0.868557	1.65682	-0.868557	0.610598	-0.334711	6.67712	7.62088e-06	0.00755887
Mmgt2	-0.874381	-0.874381	-0.874381	-0.293139	-0.874381	-0.874381	3.61298	-0.874381	-0.793096	8.4684	8.78686e-06	0.00833644
Erg	-4.07344	-2.03118	-5.09187	-3.28709	-4.06926	-5.09187	-5.09187	-3.61079	-0.516217	6.72569	1.09473e-05	0.00922857
Cep152	0.260633	-0.873192	-0.873192	1.60106	3.76053	-0.873192	-0.873192	-0.873192	-0.725573	7.55261	1.09546e-05	0.00922857
Tpm1	-0.36914	0.124128	-0.492352	0.381357	3.64647	-1.3457	-0.542495	-0.665957	3.24408	6.09695	1.0996e-05	0.00922857
Mybpc1	-1.94425	-0.456308	1.15515	-3.89692	-2.50599	-4.40972	-1.94432	-6.95163	1.31229	6.19387	1.24016e-05	0.0100228
Tulp2	0	0	2.56267	1.8669	5.10292	4.05415	1.63322	0	-0.555116	6.87228	1.46539e-05	0.0114201
Cdk15	0	0	4.06406	0.579685	0	0	1.08647	4.25281	-0.716152	7.26335	1.59492e-05	0.0116056
Col4a4	2.77022	-0.875103	-0.875103	-0.875103	1.44027	-0.875103	1.0233	-0.875103	-0.818842	7.26304	1.59556e-05	0.0116056
Ccdc61	-6.86272	-5.26993	-6.86272	-2.01461	-1.97419	-6.86272	-6.86272	-6.86272	0.292369	7.19169	1.75265e-05	0.0118582
Cgn	0	0.940522	4.31341	1.23602	0	0	1.0878	3.14402	-0.780614	6.74711	1.7632e-05	0.0118582
Gas2	0.732155	0.224175	1.87531	2.06018	-1.11705	-0.833094	5.07592	-1.76235	0.878364	5.84465	1.79332e-05	0.0118582
E130308A19Rik	2.39835	0	4.59951	2.96395	1.02453	2.53276	0	0	-0.702599	6.70627	1.87357e-05	0.0120245
Nfatc1	1.64852	2.53807	0	2.23848	2.97931	5.58076	1.41547	2.31988	-0.517894	6.13225	1.95184e-05	0.0121689
Islr2	-4.03068	-4.03068	-4.03068	-0.356173	2.18378	-4.03068	-1.78922	-2.42193	-0.109374	6.62243	2.12347e-05	0.0128712
Synj2	0	1.76718	0	4.98124	3.45476	0	1.08354	0	-0.548604	6.97961	2.3238e-05	0.0131102
Mfge8	-3.27647	-3.27647	0.0372578	-2.32187	-2.25003	-3.27647	-3.27647	-3.27647	-0.83858	6.96108	2.3823e-05	0.0131102
Cep131	-2.33777	-3.70501	-3.70501	-3.70501	-3.70501	0.297883	0.452224	-3.70501	-0.630234	6.94729	2.42685e-05	0.0131102
Asphd2	-0.139375	-4.53278	-1.20462	2.60219	-1.71165	-5.97902	-1.4387	-3.8272	1.15827	5.80975	2.53074e-05	0.0131102
Nsun7	-2.91566	0.138034	-2.91566	0.987492	2.95115	-0.39008	-1.01969	-2.91566	-0.327109	6.19645	2.58437e-05	0.0131102
Myh1	-2.01947	-1.94094	-1.08608	-2.28873	3.5898	-0.955266	-0.95248	-0.946519	0.728999	5.65513	2.60115e-05	0.0131102
Evc2	0	0.941675	0	1.2363	4.11162	0	1.08883	1.60867	-0.811868	6.48443	2.61368e-05	0.0131102
Prrg1	-0.300996	-1.31963	0.547853	3.84743	-0.296877	-1.31963	-1.31963	0.382153	-0.534074	6.18275	2.64355e-05	0.0131102
Bcl11b	-1.90432	-2.88225	-8.04693	-3.90113	-7.01889	-8.04693	-3.29588	-2.73105	1.15897	5.91128	2.88472e-05	0.0139883
Psd4	0	0.942115	0	3.83581	0	0	1.08921	0	-0.822225	7.3289	3.16014e-05	0.0149907
Tmtc3	2.83931	0.629132	-3.12388	2.80367	4.07784	-3.12388	-0.26676	-1.51526	0.535702	5.834	3.31129e-05	0.0152745
Caps2	0	3.47949	0	0	1.02526	2.53433	3.88046	0	-0.768007	6.70318	3.37944e-05	0.0152745
Meis2	-1.7577	-2.75817	-4.83169	-3.57507	2.19286	-7.29501	-1.96869	-2.3346	1.91828	5.63939	3.49035e-05	0.0152745
Plscr1	-1.36823	3.01434	-1.36823	2.29633	0.72587	-1.36823	-1.36823	-1.36823	-0.651462	6.66464	3.56281e-05	0.0152745
Sting1	-2.45625	-0.849213	2.83007	-1.37826	-0.786636	-2.45625	-1.37083	-0.97337	-0.647282	5.79201	3.56995e-05	0.0152745
C230057M02Rik	-5.8169	-3.12653	-7.68822	-6.32009	-3.42469	-7.68822	0.0866912	-2.50859	1.19839	5.75843	3.79181e-05	0.0159117
Chuk	-1.64195	-0.702537	0.229823	0.160357	1.50964	-1.64195	2.37043	-1.64195	-0.736763	5.94774	3.91109e-05	0.0160145
Gcgr	1.38865	4.04019	0	0	1.02556	0	1.89809	1.48485	-0.786861	6.21193	3.96307e-05	0.0160145
Myh8	1.73673	1.74626	0	0.575058	7.25858	0	0	0	-0.29524	6.56007	4.11528e-05	0.0160468
Tacc3	-1.32015	-1.32015	4.04414	1.70802	-1.32015	1.20853	-1.32015	1.66209	-0.518654	6.16876	4.23646e-05	0.0160468
Oxt	1.36023	-1.28828	0.109811	2.57484	4.51836	-2.23201	-1.14136	3.9113	0.453326	5.53734	4.23813e-05	0.0160468
Fancg	0	0	0	0	4.29608	2.53498	0	1.69834	-0.786809	7.07589	4.26523e-05	0.0160468
Thada	2.9162	0.55082	2.21938	3.24985	1.84205	-2.207	-2.207	4.56543	0.442941	5.66042	4.52467e-05	0.0167344
Cfap100	-0.873946	-0.873946	-0.873946	-0.873946	3.75342	-0.873946	-0.873946	-0.873946	-0.773065	7.7764	5.01277e-05	0.0182306
Ikbkg	0	0	2.56757	0	0	0	4.41461	3.21036	-0.712649	6.91421	5.18283e-05	0.0182938
Fbxo27	-2.22012	-4.83548	-4.83548	-4.83548	-0.504191	-4.83548	-4.83548	-3.13337	-0.499693	6.38991	5.21619e-05	0.0182938
Mlxipl	1.02081	3.47179	0	0	1.02434	0	1.08597	4.51135	-0.679073	6.02698	5.28165e-05	0.0182938
Osbp2	-0.656633	-4.68424	-5.61927	-5.04281	-5.61927	-5.61927	-3.72264	-5.61927	-0.207536	6.01059	5.41884e-05	0.0184757
Ikzf1	-0.98035	-0.98035	-0.98035	0.491411	3.43788	-0.98035	-0.98035	-0.98035	-0.788729	6.84432	5.64269e-05	0.0186228
C2cd4c	1.85153	2.20844	2.06092	-0.874961	1.16214	-0.874961	-0.874961	-0.874961	-0.814342	5.95076	5.95209e-05	0.0186228
Nepro	3.09531	0	1.87539	0	2.2533	2.5373	0	0	-0.861693	6.29199	5.9871e-05	0.0186228
Pld5	-1.98624	-1.58971	-1.48883	-2.13881	1.76187	-3.3561	-0.507529	-3.3561	-0.521179	5.49185	6.14716e-05	0.0186228
Vsig10l	-1.18981	-1.18981	0.685849	-1.18981	2.38767	-1.18981	-1.18981	-1.18981	-0.876221	6.76977	6.18164e-05	0.0186228
Spata6	3.59508	0.933545	4.84153	3.44977	0	5.11106	0	1.62614	-0.426739	5.67169	6.24574e-05	0.0186228
Xkr8	1.68617	0.0657567	-0.872679	3.23983	1.71674	-0.872679	0.639413	0.610613	-0.678317	5.47738	6.31197e-05	0.0186228
Usp40	1.13234	3.46043	0	4.66638	3.76338	0	4.45762	0	-0.406057	5.90776	6.36902e-05	0.0186228
Grm7	0.738319	0.345324	-1.93069	-0.665385	-1.21536	-0.725961	3.33059	-2.08822	1.26367	5.20476	6.3919e-05	0.0186228
Fut10	2.21531	2.39121	2.91119	0.942942	3.1465	1.65908	-0.871809	-0.871809	-0.621588	5.46294	6.48099e-05	0.0186228
Cyb5rl	0.519653	2.59892	-0.87258	1.25479	-0.87258	4.12856	-0.87258	-0.87258	-0.667011	5.89483	6.50026e-05	0.0186228
Lrrc56	1.03898	-0.583392	2.35991	2.17578	-2.71646	-3.74295	-3.74295	-3.74295	0.188088	5.64486	6.53951e-05	0.0186228
LOC118568604	4.31573	2.87321	0	2.32943	2.76957	2.53148	1.63563	0	-0.641934	5.64033	6.59059e-05	0.0186228
Lair1	0	4.07788	0	0	1.14025	0	0	0	-0.836043	7.48861	6.6816e-05	0.0186228
Fbxw4	0.260967	3.54349	-0.872671	2.55804	-0.872671	-0.872671	0.540785	-0.872671	-0.677401	5.87171	6.74214e-05	0.0186228
S100a7a	1.02293	2.6811	0	3.61682	1.02589	0	0	0	-0.803839	6.21131	7.04391e-05	0.0190168
Aloxe3	-3.31697	-3.31697	-3.31697	-0.951727	-3.31697	-3.31697	0.864856	-1.07004	-0.683079	6.17596	7.05909e-05	0.0190168
Odf2l	-0.336361	1.634	0.156847	2.71452	-1.70846	-1.70846	-0.626888	3.72625	-0.286531	5.40615	7.1924e-05	0.0191397
Shroom4	-2.00775	-2.00775	-0.136402	0.0145231	1.89528	2.07409	-2.00775	-0.524059	-0.716516	5.56644	7.48343e-05	0.0194944
Hdac7	4.92931	1.05123	-0.980413	3.58783	4.61022	-0.980413	0.107871	0.914668	0.0859176	5.38306	7.50437e-05	0.0194944
Tlr7	-0.87617	-0.87617	2.88233	-0.87617	0.264149	-0.87617	-0.87617	-0.87617	-0.907399	6.5854	7.76476e-05	0.0199335
Neil1	-5.6859	-5.6859	-2.37452	-0.571022	-0.355753	-5.6859	-1.6857	-4.07723	0.0949886	5.51615	8.16227e-05	0.0204483
Slc38a9	-1.35777	-6.23965	-6.23965	-2.06191	-0.377539	-2.70768	-5.14896	-6.23965	0.29851	5.51451	8.18548e-05	0.0204483
Rffl	-4.51588	-1.25563	-5.53859	0.257283	-1.9871	-3.00325	-4.02995	-4.05353	0.0841692	5.19189	8.24641e-05	0.0204483
Npr3	-3.18364	-4.31748	-4.31748	-3.73761	-4.31748	-1.7842	-2.80645	-4.31748	-0.728176	5.68987	9.00529e-05	0.0220792
Tmem176b	-0.868939	2.59075	4.85698	2.50325	-0.868939	-0.868939	2.93315	-0.868939	-0.38821	5.66482	9.3745e-05	0.0222191
Trpc4	-1.80254	-0.914075	2.13702	0.388319	-1.91248	-2.93563	-1.85164	-2.93563	-0.577093	5.2623	9.3794e-05	0.0222191
Hhatl	-1.83279	-3.98424	-2.11091	3.36239	-0.995834	-1.00739	-2.89615	-0.295376	0.0713577	5.11754	9.53317e-05	0.0222191
Hunk	4.33113	1.77594	0	0	0	0	0	0	-0.777449	7.13669	9.5864e-05	0.0222191
Acp4	1.13478	2.68577	0	0	3.1466	0	0	0	-0.886359	6.41318	9.63828e-05	0.0222191
Tpbg	-2.44238	-5.94146	-5.94146	-3.33508	-5.94146	-1.61253	-1.71171	-5.94146	-0.151298	5.64438	9.6874e-05	0.0222191
Ltc4s	0.15381	-0.979599	-0.979599	-0.979599	2.66919	2.6809	0.105527	3.3881	-0.635053	5.41226	9.77512e-05	0.0222191
Haus8	-2.62136	-3.33387	-4.27287	-2.14397	-3.24823	-4.27287	-2.63552	-4.27287	-0.715414	5.39157	0.000101342	0.0227977
Plekhg3	-4.64825	-3.01134	-4.64825	-1.94884	-2.33819	-4.64825	-4.64825	-4.64825	-0.615625	5.91488	0.000102822	0.0228947
Gm5820	0	0.941251	0	1.64754	1.14018	4.54627	0	1.60867	-0.801608	5.57628	0.000108112	0.0238293
Nek5	-2.37988	2.33914	-2.37988	0.427687	-2.37988	0.150982	-1.29507	-2.37988	-0.62067	5.56969	0.000109269	0.0238437
Recql5	-3.66428	0.775517	-1.7988	0.969432	-2.64251	1.44696	-2.03387	-3.66428	-0.279278	5.1643	0.000112543	0.0241088
Pot1b	-1.20072	2.31514	0.664565	1.16957	1.90422	5.02583	-0.119164	3.05001	-0.287839	5.03213	0.000112694	0.0241088
Abca17	-3.24173	-4.60725	-4.60725	-4.60725	-4.60725	-4.60725	-4.60725	-4.60725	-0.699858	6.94509	0.000117226	0.0248348
Pdzd7	-0.980781	-0.0380762	-0.980781	2.48082	0.0458355	-0.980781	-0.980781	-0.980781	-0.859161	5.80211	0.000121251	0.0248879
Cyp2r1	1.02465	3.23673	0	0	1.02714	0	0	0	-0.914116	6.22636	0.000122284	0.0248879
Slfn5	-3.27458	-2.34212	-3.27458	1.21513	-2.25344	-0.749103	-2.1939	2.08542	-0.330964	5.11663	0.000123025	0.0248879
Ccnl1	1.26855	1.80249	-3.56274	2.09453	3.79414	-1.0244	0.0471294	-3.56274	0.56302	5.11527	0.000123337	0.0248879
Stac3	-0.980959	-0.980959	2.77743	-0.980959	0.159357	-0.980959	-0.980959	-0.980959	-0.904642	6.21347	0.000124325	0.0248879
Taf4b	0	1.7808	0	0	2.03816	0	3.43994	0	-0.878465	6.21304	0.000124394	0.0248879
Cmtm3	-3.31962	-3.40361	-4.33602	-1.35546	1.01239	-4.33602	-1.01194	-4.33602	-0.350863	5.26967	0.00012546	0.0248879
Rtl4	2.02789	3.58928	0	2.77623	4.71511	2.52939	0	1.62585	-0.557764	5.25393	0.000128983	0.0251384
Tmem268	0.406121	-4.35085	0.712384	-3.26681	-3.21132	-4.35085	-4.35085	-4.35085	-0.34033	5.46726	0.000129027	0.0251384
Eda	0.699749	-1.15088	1.06626	-3.1756	-3.1756	-3.1756	-3.1756	-1.69279	-0.644075	5.44848	0.000133038	0.0255642
Ppp1r13l	0.0945921	0.689427	-1.84781	-1.84781	2.60717	3.12646	0.429572	-0.145646	-0.4956	5.07278	0.000133556	0.0255642
Prcd	-0.639596	1.7862	0.92275	-1.80059	2.29914	-2.37751	-1.29406	-2.37751	-0.542301	5.05637	0.000137733	0.0260647
Rcsd1	1.02036	1.60704	1.87004	4.26591	3.2202	0	0	2.24658	-0.647158	5.21331	0.000138559	0.0260647
Fign	-4.38664	-4.38664	-2.52106	0.078217	-0.78039	-4.38664	-2.97024	-2.6908	-0.436913	5.20635	0.000140272	0.0261265
4932438H23Rik	-0.149254	-0.231374	-1.17074	2.90405	-0.0306802	-1.17074	1.3386	-1.17074	-0.734693	5.18976	0.000144445	0.0261265
Kcnt1	4.71186	4.42009	0.895415	5.60946	4.25935	-0.981	0.10961	0.627622	0.51613	4.90103	0.000145921	0.0261265
Nckap5	-1.35263	-4.68948	0.550249	1.99093	0.381255	0.189483	-2.24878	-2.36913	0.446834	4.8962	0.000147324	0.0261265
Prg4	-0.519017	2.72083	3.99346	4.02215	2.40153	-1.53991	-1.53991	0.153002	-0.0568535	5.01869	0.00014784	0.0261265
Sned1	-0.876329	2.28686	-0.876329	-0.876329	-0.876329	-0.876329	0.214372	-0.876329	-0.91963	6.06502	0.000150645	0.0261265
Cep55	-1.17699	2.9387	0.687588	4.23968	-1.17699	-1.17699	-1.17699	-1.17699	-0.379724	5.64947	0.000151922	0.0261265
0610040J01Rik	0.743074	-1.89868	-0.487453	-2.83698	-2.83698	-2.83698	1.04629	-2.83698	-0.667622	5.3621	0.000153232	0.0261265
Milr1	-1.16982	-1.16982	-1.16982	-1.16982	3.39182	-1.16982	-1.16982	-1.16982	-0.774345	6.68864	0.000154267	0.0261265
Vrk2	0.493558	1.07341	-1.71678	-1.71678	2.54054	-1.71678	-0.303974	-1.71678	-0.738461	5.35598	0.000154779	0.0261265
Lmo7	-1.43124	-7.12428	-7.12428	-0.647269	-6.09729	-7.12428	-7.12428	-7.12428	0.771544	5.63464	0.00015531	0.0261265
Gm32856	1.021	3.29195	1.87099	3.50872	0	0	3.49371	1.48347	-0.696584	5.14495	0.000156376	0.0261265
Sidt1	0.153888	-0.0381772	-0.980752	2.49365	-0.980752	-0.980752	-0.980752	-0.980752	-0.85129	5.62256	0.000158128	0.0261265
Proc	-0.875298	-0.875298	-0.875298	-0.875298	3.21371	-0.875298	-0.875298	0.733355	-0.832924	6.02429	0.000158861	0.0261265
Cntn3	-1.00984	3.44768	2.52628	1.55344	-1.12063	-2.14219	0.530721	-2.14219	-0.297879	4.97596	0.000160238	0.0261265
Zfand4	0	0	4.74608	4.67622	4.04258	0	1.08174	1.60881	-0.433593	5.33197	0.00016101	0.0261265
Map3k11	-3.88861	-0.221263	-3.88861	-3.88861	1.06929	-0.226273	-3.88861	-3.88861	-0.462902	5.60944	0.000161249	0.0261265
Rttn	0	0	0	0.920473	0	0	3.87908	0	-0.863402	6.64634	0.000161511	0.0261265
Idua	-0.874175	-0.874175	-0.874175	1.8526	2.72832	1.6607	1.82415	-0.874175	-0.784107	5.32944	0.00016168	0.0261265
1700010I14Rik	-3.23551	-3.23551	-3.23551	-1.46363	-2.21045	1.30762	-3.23551	-3.23551	-0.753777	5.59297	0.000165262	0.0261265
Tbc1d4	0	3.15943	0	0.582452	3.60919	0	0	0	-0.841922	5.99266	0.000165573	0.0261265
Nfatc2	-0.868806	0.063929	-0.868806	4.04892	2.6396	-0.868806	4.05858	1.77889	-0.319376	5.11069	0.000166183	0.0261265
Myo9b	1.37318	0	0	5.04233	5.25102	0	0	0	-0.324772	5.98873	0.000166426	0.0261265
Arntl2	0.153813	0.627711	4.4065	2.04122	-0.979644	-0.979644	-0.979644	-0.979644	-0.642398	5.30366	0.000168694	0.0261873
Zmynd19	-1.97688	-1.3836	-3.62818	-3.04872	-1.59368	-1.09548	-0.239859	-3.62818	-0.699304	4.9471	0.000169214	0.0261873
Gbgt1	3.07084	-0.980286	-0.980286	-0.980286	-0.980286	-0.980286	-0.980286	1.33989	-0.779949	5.94927	0.000175273	0.026934
Arhgap22	-3.73	-3.67289	-6.35998	-0.466007	-0.330369	-6.35998	-2.28338	-4.75136	0.511064	4.89495	0.000186773	0.028073
Mocos	-0.980723	-0.038276	-0.980723	-0.980723	0.0457558	-0.980723	-0.980723	2.84949	-0.843445	5.50911	0.000187383	0.028073
Uck2	1.65407	2.23844	4.07148	2.02912	0	0	0	0	-0.83097	5.49755	0.000190669	0.028073
Agbl2	1.13361	0	2.93604	3.57633	4.33284	0	0	0	-0.668933	5.49181	0.000192324	0.028073
Trim11	-0.428638	0.648458	1.02217	-0.221758	0.531939	-2.75656	-2.75656	2.85296	-0.266976	4.87878	0.00019259	0.028073
Itprid1	3.17296	0.942812	0	0	2.72849	0	1.08983	0	-0.865533	5.48878	0.000193204	0.028073
Tspan18	2.70209	0.934529	0	4.14687	3.42327	5.1132	1.08251	1.6088	-0.479146	4.87289	0.000194755	0.028073
Heatr5a	0	2.87166	0	3.06399	4.38092	0	3.87264	1.60877	-0.586243	5.21146	0.000196483	0.028073
Slc7a6	-2.58708	-1.4613	-1.2971	0.861157	-4.2333	-1.70799	-2.24816	-4.2333	-0.344011	4.86758	0.000196728	0.028073
Arhgap8	3.77852	0	0	0	1.14009	0	3.74901	0	-0.753635	5.86042	0.000197079	0.028073
Inka2	-2.48318	-3.19568	-4.13472	-1.9507	-4.13472	-4.13472	-2.15145	-4.13472	-0.717882	5.20679	0.000198013	0.028073
Trpc7	1.74043	0	0	3.85494	1.14014	0	0	1.60869	-0.783056	5.46847	0.000199206	0.028073
Sowaha	-2.36346	-0.280001	-3.38495	-1.7255	-3.38495	0.206925	-2.29817	-3.38495	-0.734363	5.29232	0.000199409	0.028073
Casp2	0.484991	-2.09872	-4.49695	0.498296	-1.52902	0.0417245	-3.08304	-4.49695	-0.0937339	4.84715	0.000204516	0.0286073
Tubd1	-2.58882	-0.195755	-0.721295	-1.15601	3.12112	-2.58882	-2.58882	-0.163104	-0.536877	4.97999	0.000209855	0.0291671
Fbln2	1.02403	2.23978	1.87549	0	1.14028	2.53741	3.00373	0	-0.867186	4.97253	0.000212682	0.029373
Scn5a	-2.05818	0.209761	-1.32451	-3.19082	0.553174	2.13099	-1.77484	-3.19082	-0.472509	4.82049	0.000215163	0.0295288
Brdt	4.87524	3.05876	0	2.01275	4.51694	0	0	0	-0.476406	5.39648	0.00022212	0.0302931
Ankdd1a	0	1.43555	0	2.67457	1.02432	0	1.8975	4.5921	-0.675507	5.13362	0.00022366	0.0303135
Zdhhc15	-0.980801	1.25888	2.57665	-0.398044	-0.980801	-0.980801	1.53468	-0.980801	-0.864621	5.1252	0.000226826	0.0305355
Agbl3	-4.25962	-4.25962	-4.25962	-1.56166	-3.1199	-4.25962	-3.17705	1.79938	-0.230852	5.11052	0.000232459	0.0305355
Slc38a6	0.516133	-0.893434	-3.67851	-1.15769	-2.09983	-3.67851	-0.682916	2.34356	-0.104448	4.7793	0.000232744	0.0305355
Adarb2	-3.50056	-1.85798	-0.176751	-2.40486	-2.45686	-2.10629	-0.943101	-4.63297	-0.424035	4.66518	0.000233385	0.0305355
Ppfibp1	-1.77304	-2.56893	-5.11131	-2.74016	-5.29055	-6.98775	-5.89712	-3.03048	0.480759	4.66508	0.000233429	0.0305355
Slc30a3	-4.20765	-2.88305	-1.26264	-2.73668	-2.09359	-5.76684	-5.76684	-4.0654	-0.162066	4.77717	0.000233694	0.0305355
Wfikkn2	4.5454	0	1.87176	0	0	0	0	0	-0.736203	6.30342	0.00023583	0.0306016
Slc17a7	-2.20519	-1.81207	-4.08043	-4.08043	-2.12043	-1.17649	-4.08043	-4.08043	-0.69768	5.09894	0.000237004	0.0306016
Rbm43	5.67813	3.92913	0	3.67797	5.43577	0	0	2.26138	-0.039652	5.07748	0.000245675	0.0313919
Atp8b3	0	1.62969	0	0.582655	1.0266	0	3.68374	0	-0.857157	5.32899	0.000246129	0.0313919
Stpg3	-0.278353	-1.64151	-1.64151	-1.64151	-1.64151	2.90342	0.596612	-1.64151	-0.783978	5.31587	0.000251105	0.0313919
Zranb3	0.148236	-0.874134	-0.874134	2.41114	2.67648	1.66067	-0.874134	-0.874134	-0.782232	5.06441	0.000251121	0.0313919
Hapln1	-3.84107	-2.90116	-1.34631	-2.91905	-1.59121	-3.84107	-2.20256	-3.84107	-0.758395	4.87948	0.000251454	0.0313919
Trip13	0	1.44176	0	0	3.7051	0	1.50674	1.60865	-0.843891	5.31417	0.000251757	0.0313919
Lat2	-2.92313	0.604629	-2.92313	1.62877	-2.92313	-0.393422	-2.92313	-2.92313	-0.573442	5.30777	0.000254228	0.03152
Niban3	0	3.62927	0	0	4.08494	0	0	0	-0.765278	6.21712	0.000259886	0.0320394
C4b	-4.01515	-0.547066	0.340566	0.708941	1.22233	-1.48557	-1.73479	-4.01515	-0.160837	4.71238	0.000264538	0.0322974
Mpp2	4.51341	3.58405	-0.979836	3.42204	3.8452	-0.979836	1.53805	0.503516	-0.0585192	4.71159	0.000264939	0.0322974
Cenpk	-4.16915	-4.16915	-4.16915	-1.72191	-3.1447	-4.16915	-1.31909	-2.56042	-0.692712	5.02313	0.000269156	0.0324402
Osbpl6	-0.491417	1.00264	-6.81827	-1.11959	-0.519227	-3.50118	0.901994	-6.81827	1.70279	4.70115	0.000270295	0.0324402
Thrb	-1.99173	-2.47237	-4.07249	-1.45462	1.08397	0.106478	2.05681	-5.11362	1.87323	4.49997	0.000272497	0.0324402
Per2	-3.77968	-0.0170883	-1.91228	-0.127154	-0.142821	-3.77968	-3.77968	-2.29846	-0.528924	4.83452	0.000272747	0.0324402
Sgcz	-2.57984	-1.63997	-2.57984	-1.62839	-0.61863	1.96346	-0.427631	-2.57984	-0.757223	4.82943	0.000275271	0.0324402
Adamtsl1	0	2.89433	0	1.62126	4.00171	2.53418	1.41243	0	-0.76306	5.00803	0.000276083	0.0324402
Fgfrl1	-2.99977	-2.99977	-1.12735	-2.04814	0.928531	-2.99977	-0.712725	-2.99977	-0.762723	5.00631	0.000276884	0.0324402
Pgghg	0	0.943405	3.75816	1.22982	1.14031	0	0	0	-0.899153	6.0821	0.000278016	0.0324402
Cntnap5c	-2.54622	-1.2595	-1.26838	-1.54626	-5.32201	-2.41348	-5.32201	-5.32201	-0.240147	4.82065	0.000279683	0.0324402
Sbno2	2.91387	0	0	0.580716	0	0	4.20309	0	-0.772763	5.59573	0.000280977	0.0324402
Zfp239	-0.87177	-0.87177	-0.87177	1.25304	-0.87177	-0.87177	-0.87177	4.29677	-0.619153	5.57332	0.000289647	0.0332618
Slc9b1	-0.802325	0.326312	-2.44985	2.24853	0.567672	0.0773606	1.55322	-2.44985	-0.450103	4.65966	0.000292721	0.0332618
Rps6ka4	-2.54663	-1.57323	-3.54857	-1.51173	-1.05441	-5.4161	-2.56708	-5.4161	-0.179861	4.65876	0.000293226	0.0332618
Cklf	0.339024	-2.97543	1.2385	-2.50597	-2.24155	-3.90853	-0.501594	-3.90853	-0.399752	4.65602	0.000294773	0.0332618
Cd46	1.01681	2.38717	4.8664	2.55353	3.24737	0	4.41881	4.20583	-0.391494	4.65436	0.000295715	0.0332618
Eogt	3.22697	0.451147	-2.61348	1.76348	-0.12098	-2.61348	0.981982	-2.61348	-0.135412	4.78075	0.000300684	0.0335279
Socs6	2.64162	-3.91114	-3.91114	-1.11197	-0.184798	-3.91114	-0.677794	-2.00938	-0.060272	4.77693	0.000302781	0.0335279
Gdf9	-0.875999	1.16034	2.43961	-0.875999	-0.875999	-0.875999	1.41661	-0.875999	-0.893862	5.37881	0.000302839	0.0335279
Dglucy	-2.24144	-0.54353	-2.02286	-1.87616	1.06927	-3.88965	-3.88965	-3.88965	-0.493017	4.77431	0.000304226	0.0335279
Spice1	0	0.942571	3.00355	2.62081	3.03099	0	0	0	-0.85109	5.17889	0.000309862	0.0339773
Rasal2	-1.12343	-1.70155	-2.04513	-0.730497	0.759685	-4.75308	-2.5825	-5.14093	1.54608	4.4345	0.000312601	0.0341063
Sh3tc1	-1.36082	1.36334	0.923846	-0.309586	1.5841	-2.38139	-2.38139	-2.38139	-0.657141	4.75591	0.00031458	0.0341515
Mbtd1	-4.47797	0.319651	-5.61455	-0.898062	3.49597	-5.61455	1.74256	1.06847	1.82865	4.61482	0.000319118	0.0344726
Ppp1r16a	0.748667	-0.71171	-4.49038	1.13472	-0.274066	-4.49038	-1.48648	0.423139	0.227019	4.60926	0.000322556	0.0344935
Pms1	-3.76404	-3.14894	-5.13445	0.185632	-4.11204	-5.13445	-2.28672	-5.13445	-0.218509	4.74058	0.000323485	0.0344935
Cage1	0	2.99691	0	0	1.14031	2.8281	0	0	-0.900512	5.48578	0.000326363	0.0344935
Mapkbp1	-2.58529	0.821597	-2.58529	1.57921	-2.58529	-2.58529	-0.579764	-2.58529	-0.654501	5.14317	0.00032745	0.0344935
Rbpms	-0.917678	0.09222	-1.44492	-3.31606	0.0451941	-3.31606	-3.31606	-3.31606	-0.705132	4.90481	0.000328731	0.0344935
4930503B20Rik	-0.16469	0.97613	-2.42068	-2.42068	-2.42068	-2.42068	-2.42068	-2.42068	-0.829764	5.48035	0.000328795	0.0344935
Fnip2	-3.57201	-1.21391	-4.70343	-2.81271	-0.0113092	-4.70343	-0.510665	-4.70343	-0.325682	4.72684	0.000331688	0.0346024
Meiob	0	2.7983	3.55699	1.93419	1.14026	0	0	0	-0.851376	5.1323	0.000333005	0.0346024
Kif27	-3.96099	-1.25049	0.2802	-0.551173	-3.94296	-5.61484	-4.20366	-3.36614	0.149416	4.48247	0.000337189	0.0346116
Cd247	0	3.38949	0	4.44994	1.02429	0	0	0	-0.671027	5.4613	0.000337493	0.0346116
Gm46178	0.513232	0.407145	0.749615	0.123033	3.01896	0.17386	-0.106956	1.20432	6.58944	4.39754	0.000337852	0.0346116
Kcnh7	-2.87244	-1.89386	-5.69691	-2.45806	-4.55554	-3.16762	-1.77805	-5.69691	-0.169999	4.58148	0.00034033	0.0346669
Cadps2	-0.564515	-3.10464	-6.89	-1.71196	0.558853	-6.89	-2.03949	-6.89	1.07156	4.71066	0.000341628	0.0346669
Zfp385b	-0.879159	-5.09608	-1.22772	-0.16194	2.44325	-5.09608	-5.09608	-1.92015	0.464797	4.70821	0.000343158	0.0346669
Slc30a5	-3.2491	0.575876	-4.38404	0.941047	0.633776	-4.38404	2.21838	-2.69429	0.326956	4.57078	0.00034744	0.0347952
Tia1	-3.14706	-1.65892	-4.81551	-1.88812	-0.195862	-4.87266	-0.154169	-7.83351	1.75653	4.46742	0.000347617	0.0347952
D16Ertd472e	-1.70033	-2.76495	-4.7854	-2.10458	-4.7854	-4.7854	-2.50561	-4.7854	-0.546997	4.86451	0.000352034	0.0350764
Relch	-3.51093	-4.52086	-3.31914	-3.04966	-3.95725	-4.18306	-2.01047	-7.78686	2.76965	4.37408	0.000354956	0.0351182
Espn	1.14109	-1.2841	-4.16831	0.911798	-4.16831	-4.16831	-4.16831	-4.16831	-0.156028	5.08813	0.000356634	0.0351182
9030622O22Rik	-0.875886	-0.875886	3.05081	0.190379	-0.875886	-0.875886	-0.875886	-0.875886	-0.884633	5.41901	0.000357684	0.0351182
Pcgf6	-1.49395	0.483426	-2.62684	-0.109896	-2.62684	-2.62684	2.44208	-2.62684	-0.530984	4.85206	0.000359583	0.0351182
Kif7	-4.68302	-3.74604	-4.68302	-4.68302	-0.936103	-2.15234	-4.68302	-4.68302	-0.613874	5.0805	0.000360892	0.0351182
Myo5b	-2.36774	-1.83893	-4.10726	-3.15719	-3.08274	-4.10726	-1.25206	-4.10726	-0.701852	4.6788	0.000362109	0.0351182
Mark3	-0.236661	0.813871	-2.23026	-1.53438	3.47255	-1.82633	1.18104	-0.150118	3.68472	4.3601	0.000365568	0.0352967
Tgfbr1	3.73365	1.54932	-2.67266	0.83007	1.00846	-2.67266	-0.162237	-1.18832	0.016358	4.53892	0.000369532	0.0354342
Zzz3	1.6167	2.04073	-0.652127	-1.18258	0.566774	-2.18848	-2.43363	-4.72679	0.625359	4.43632	0.00037024	0.0354342
Adamts6	3.37317	0	0	0	1.02689	0	1.09018	0	-0.888339	5.39009	0.000372227	0.0354688
Mppe1	-3.18387	-0.676233	1.94951	-0.690578	-0.0388068	-5.64141	-1.63641	-3.39194	0.729631	4.43003	0.000374993	0.035577
Lbhd2	5.33571	2.64005	4.82479	3.15515	4.86007	0	3.42678	0	-0.139362	4.65517	0.000378117	0.0357181
Myo19	1.02409	0	0	1.95895	1.02673	0	3.43971	0	-0.872056	5.04179	0.000383324	0.0359757
Unc13b	-5.33976	-5.33976	-5.33976	0.111741	-0.0580477	-5.33976	-1.18333	-3.73108	0.075421	4.81334	0.000384141	0.0359757
Lrmp	-0.875422	0.0670403	-0.875422	0.495104	-0.875422	1.66155	2.56334	0.610611	-0.844393	4.64208	0.000387295	0.0361161
Pxn	0.19675	-1.19422	2.35552	-0.118427	2.92944	-1.19422	-1.19422	0.414492	-0.723128	4.63386	0.000393182	0.0365091
Vmn2r36	-0.608142	1.81209	-0.876719	-0.876719	-0.876719	-0.876719	-0.876719	-0.876719	-0.94796	5.34536	0.000395976	0.0366126
Cecr2	-0.979447	2.86705	-0.979447	1.67722	3.57415	-0.979447	-0.979447	1.26663	-0.60769	4.7917	0.000398619	0.0367015
Sntg2	-3.40625	-0.512456	-3.40625	-1.96977	-0.454798	1.30733	-3.40625	-3.40625	-0.640787	4.78568	0.000402748	0.0369259
Card14	1.88254	0.00496876	0.253625	-1.6203	-1.6203	0.915451	-1.6203	-1.6203	-0.805313	4.77518	0.000410057	0.0374387
Aasdh	-0.0138046	-5.35373	-5.35373	0.31102	-1.64449	-2.8174	-5.35373	-3.74507	0.145222	4.60855	0.000411883	0.0374487
Prdm4	-3.02507	-1.51286	-2.45026	-2.76979	-4.36534	-5.38646	-4.30581	-5.38646	-0.332811	4.46392	0.000427452	0.0387031
Odf3l1	-4.40368	-1.33337	-4.40368	-4.40368	-3.26365	-4.40368	-3.31739	-4.40368	-0.703915	4.96633	0.000431381	0.0388974
Rasal1	-1.99159	-2.89819	-0.734032	-1.70585	-6.38791	-6.38791	-2.22533	-4.90096	0.332526	4.4556	0.000434427	0.0390109
Zfp800	-1.47869	-1.79221	-2.09852	0.530598	-2.02033	-5.65806	-2.3111	-4.04944	0.298434	4.35025	0.000441043	0.0393948
Ulk4	-2.68189	0.423858	-2.68189	-2.68189	-2.68189	-2.68189	1.21507	-2.68189	-0.76078	5.26333	0.000443813	0.0393948
Traip	-3.22331	-3.22331	-3.22331	0.589155	-1.64363	-0.690715	-0.715253	-3.22331	-0.692903	4.72228	0.000449035	0.0393948
Fhad1	-1.90897	3.01379	-1.90897	3.17769	-1.90897	-1.90897	-1.90897	0.455624	-0.338486	4.93781	0.000451158	0.0393948
Ddx4	0.262808	2.34098	1.48551	3.99098	2.14805	-0.869769	-0.869769	2.71142	-0.460372	4.4351	0.000452123	0.0393948
Mycl	-3.1354	-3.1354	-1.26361	-1.91175	0.868589	-3.1354	-1.12775	-1.65143	-0.737315	4.55635	0.000453429	0.0393948
Gm11100	2.45773	-0.97927	2.76286	-0.0325863	1.05295	1.55037	3.39356	1.83978	-0.569934	4.33401	0.000455884	0.0393948
Homer1	3.93474	1.15244	2.65527	0.865663	-0.579046	-0.479995	3.81228	-3.30818	0.86736	4.33007	0.00045956	0.0393948
C2cd4b	3.0984	0	0	0	1.58362	0	1.64298	0	-0.895567	5.23701	0.000460436	0.0393948
Top2a	0	0	0	0.583764	1.02732	0	3.00608	0	-0.931711	5.23216	0.000463569	0.0393948
Sigirr	2.45605	3.40799	4.95251	1.07939	3.99141	0	3.17862	0	-0.512392	4.54263	0.000465052	0.0393948
Zfp444	0.166329	-2.88539	-2.88539	-2.30299	-1.85896	-2.88539	-1.79595	-2.88539	-0.838102	4.8746	0.000465554	0.0393948
Ptchd4	-4.33192	-1.11723	-4.33192	-1.55616	-0.143427	-4.33192	-3.24845	-4.33192	-0.543751	4.69952	0.000466979	0.0393948
Nrros	-4.00889	-4.00889	-4.00889	-4.00889	-2.86868	-4.00889	-4.00889	-4.00889	-0.81199	5.70936	0.000467657	0.0393948
Cobll1	-3.79126	-1.0441	-4.81072	0.735095	-4.81072	-2.28048	-2.82675	-3.20195	-0.139031	4.41745	0.000467947	0.0393948
Rab3ip	3.30038	-0.869066	-0.869066	3.62053	3.6792	-0.869066	1.81544	-0.869066	-0.400552	4.69631	0.000469567	0.0393948
Clcn1	3.95652	3.21931	2.56504	0.923365	3.70028	2.98293	0	0	-0.628724	4.5366	0.000470254	0.0393948
Ulk3	-2.6722	-0.137043	1.82738	2.17838	-2.6722	-2.6722	0.0139487	-2.6722	-0.453478	4.6943	0.0004712	0.0393948
Mmp9	-1.98841	-0.546026	1.76855	-0.515159	-1.98841	-1.98841	-1.98841	-1.98841	-0.868434	4.90449	0.000475482	0.039548
Styxl1	0	0	4.89622	3.20511	0	0	0	2.52177	-0.661603	5.21228	0.000476657	0.039548
Ttll8	0	0.9437	3.55937	0	0	0	1.41004	0	-0.914827	6.13712	0.000478501	0.0395506
Hps5	-4.17964	-1.11901	-2.81834	0.094581	-4.28858	-5.3136	-1.11171	-3.62138	0.000823648	4.30827	0.00048047	0.0395635
Synpo	-0.723741	0.619845	-1.85647	3.88595	-0.280048	-1.85647	1.56665	2.30683	-0.22223	4.4004	0.000483782	0.0396852
Kcnk13	1.83338	-0.872833	-0.872833	3.12144	2.4932	-0.872833	-0.872833	-0.872833	-0.694232	4.88956	0.000486823	0.0396852
Ccna1	4.34617	-1.17738	-1.17738	1.44813	-1.17738	-1.17738	1.41511	2.63883	-0.350419	4.673	0.00048883	0.0396852
Ccdc114	1.73863	0	3.06796	3.90908	0	2.53071	4.14829	0	-0.615297	4.67254	0.000489222	0.0396852
Trpc1	-3.56959	-2.15434	-4.95446	-1.39832	1.68199	1.28582	-1.26946	-3.34583	0.253869	4.29656	0.000492104	0.0397711
Fam228b	-5.08899	-1.03369	-3.22304	-0.404752	-4.06699	-5.08899	-3.6728	-3.48018	-0.258373	4.38053	0.000502932	0.0404296
Slc4a11	1.13465	2.79844	0	1.23653	3.25383	0	1.08967	0	-0.85473	4.65536	0.000503957	0.0404296
Stpg1	2.60803	-0.385293	1.03353	3.42516	-0.180653	-1.32041	-1.32041	-1.32041	-0.510438	4.49228	0.000510411	0.0405337
Tcf19	3.50643	0	3.311	1.80241	1.67136	0	0	0	-0.795046	4.85891	0.000511003	0.0405337
Zfp516	1.13459	0	0	0	3.52671	2.9	0	1.69725	-0.839235	4.85815	0.000511623	0.0405337
Cyp4f40	-0.908563	1.48769	-0.0572463	-1.93229	-1.93229	-1.93229	-1.93229	-0.307273	-0.841973	4.64542	0.000512685	0.0405337
Stat4	-0.875328	-0.875328	1.4685	-0.292956	-0.875328	-0.875328	3.01783	-0.875328	-0.835719	4.84982	0.000518418	0.040839
St6galnac3	1.99093	2.04613	0.155877	3.08211	-0.68804	-1.71001	-1.71001	-0.101199	-0.452224	4.35939	0.000524167	0.0411434
Abi3bp	-6.31511	-6.31511	-6.31511	-2.59745	-6.31511	-6.31511	0.056063	-6.31511	0.234814	5.12394	0.000539756	0.0419938
Rnf19b	3.75961	2.77442	1.86509	4.06503	4.51314	2.52642	3.46726	1.47977	-0.410396	4.25068	0.00054053	0.0419938
Wdr93	0	4.50298	0	0	0	0	3.43204	0	-0.725137	5.58737	0.000540836	0.0419938
Kirrel	-2.88919	-1.47379	-4.02317	-2.11768	-4.02317	-4.02317	-4.02317	-4.02317	-0.756829	4.81761	0.0005456	0.0419938
Inpp5b	-0.213607	-2.59375	-5.7047	-0.803875	-0.217311	-3.16618	-3.18739	-1.99745	0.327606	4.24542	0.000546385	0.0419938
Stard8	-2.60648	0.724979	1.79674	1.89023	-1.58454	-0.0792951	2.55606	-2.60648	-0.264426	4.33354	0.000551386	0.0419938
Bcorl1	1.63185	2.73382	-1.45224	1.74148	3.16049	-1.45224	-1.45224	-1.45224	-0.503894	4.60253	0.000552234	0.0419938
Nrn1l	-1.64376	-1.23077	-0.142107	-0.298159	-1.09559	-4.30113	-2.67137	-4.30113	-0.400636	4.34954	0.000554018	0.0419938
Filip1	-4.44873	-2.42381	-4.44873	-2.13634	-4.44873	-1.1513	-4.44873	-2.75537	-0.647418	4.59579	0.000558727	0.0419938
Pomt2	-2.65656	-4.39465	-1.40318	-1.1158	-1.07007	-4.39465	-4.39465	-2.7688	-0.56316	4.44266	0.000559609	0.0419938
Fam122b	-2.83894	-1.73673	-4.71536	-2.44216	-3.69202	-4.71536	-3.30073	-4.71536	-0.595316	4.44253	0.000559752	0.0419938
Ptprb	-5.31897	-1.73667	-3.4528	-0.853887	-2.17456	-1.5698	-3.80358	-3.07485	-0.201456	4.23262	0.000560906	0.0419938
Lca5l	-1.54146	2.14747	-1.54146	-0.587322	0.13044	-1.54146	0.97259	-1.54146	-0.819003	4.58958	0.000564778	0.0419938
Hinfp	2.30692	0.157906	-3.70697	1.06215	2.21573	-1.16888	-0.00636017	-3.70697	0.267754	4.31927	0.000567036	0.0419938
Dgka	-0.872891	2.51736	1.476	3.01825	0.151613	-0.872891	0.638789	-0.872891	-0.699852	4.43517	0.000567451	0.0419938
Pycr1	-1.5155	1.38284	-2.53315	2.22421	-2.53315	-2.53315	1.19481	-2.53315	-0.458927	4.58622	0.000568084	0.0419938
Tmem232	0	0	0	3.12227	0	0	0	1.48655	-0.889048	5.54305	0.000570406	0.0419938
Ccdc77	0	0.941671	0	2.799	0	0	3.88364	0	-0.811775	5.08173	0.000572986	0.0419938
Zc3h3	-0.14239	-2.49771	-4.51224	-1.966	-0.300867	-4.51224	-2.51466	-2.90341	-0.378899	4.3132	0.000573825	0.0419938
Foxa1	4.23325	3.21966	2.3507	3.01858	0	0	0	1.60875	-0.633752	4.57982	0.000574436	0.0419938
Trim12a	-0.876114	-0.876114	-0.876114	-0.292802	0.150914	-0.876114	2.25425	0.610609	-0.903007	4.57673	0.000577531	0.0419938
Yipf7	1.653	1.43937	4.11548	1.25035	0	0	0	2.26223	-0.791855	4.57485	0.00057942	0.0419938
Shisa6	-0.618755	-1.04416	-1.98351	2.04843	-1.98351	-1.98351	0.302428	-1.98351	-0.734066	4.57345	0.000580835	0.0419938
Tfcp2l1	0.153882	0.4606	-0.98065	-0.0263586	-0.98065	3.75166	-0.98065	-0.98065	-0.822712	5.2175	0.000581189	0.0419938
Shld2	-2.80018	-1.06408	-2.80018	2.0272	-2.80018	-2.80018	-2.80018	-1.31848	-0.571581	4.77207	0.000586622	0.0420864
Kcnt2	1.37266	0	0	4.16589	3.59099	0	5.27976	0	-0.394816	4.76964	0.000588903	0.0420864
Fam229b	-2.53731	-0.311199	-0.668435	2.1739	-2.53731	-2.53731	-1.12279	-0.928546	-0.603646	4.41158	0.000592907	0.0420864
Dzip1l	3.68764	3.96918	5.33232	4.40418	4.38333	6.03733	1.41231	0	0.0311763	4.29571	0.000593876	0.0420864
Rcn3	0.278544	-1.2786	-3.67287	1.68775	0.587739	-0.766054	-0.277137	-3.67287	-0.160572	4.2949	0.000594824	0.0420864
Ankfn1	0	0	0	3.1019	0	4.32781	0	4.79086	-0.550532	5.05409	0.000595917	0.0420864
Dipk2b	-2.54993	-2.54993	-0.678113	1.34346	-0.068656	-2.54993	-2.54993	-2.54993	-0.73899	4.76216	0.000595972	0.0420864
Inpp5d	-2.50987	-1.13196	-2.03132	0.212349	-3.36693	-4.38831	-1.48198	-4.38831	-0.386642	4.28426	0.000607388	0.0427542
Phf19	0	3.37078	0	0	0	0	0	0	-0.91883	6.26332	0.000616523	0.0432577
Usp37	-2.07742	-0.432346	-3.09495	1.28793	0.713287	-3.09495	2.42644	-3.09495	-0.262842	4.38576	0.000622113	0.04351
Nphp4	1.36623	3.92705	0	3.27817	3.83963	0	0	0	-0.659518	4.73231	0.000625081	0.043578
Robo4	1.39161	3.67975	0	3.59774	1.02449	2.53267	2.28486	0	-0.697671	4.37259	0.000637588	0.0443083
Mbnl3	-0.876158	-0.876158	1.0001	1.79391	-0.876158	-0.876158	-0.876158	0.610609	-0.906442	4.70947	0.000648369	0.0447804
Per3	0.0411364	1.37296	-0.979882	2.72475	-0.979882	-0.979882	2.76693	-0.979882	-0.698512	4.51019	0.000648528	0.0447804
Smarcd2	-0.909095	0.468207	-1.92908	-0.162083	0.381295	1.82412	2.71667	-1.92908	-0.627855	4.24938	0.000650539	0.0447804
Plekhh3	-0.874884	4.47225	4.21108	4.72272	3.88788	-0.874884	3.66471	-0.874884	0.128344	4.36013	0.000652591	0.0447805
Dhx57	-3.18944	0.541888	-4.21308	1.97969	-1.25663	-4.21308	-2.80212	0.77266	0.174862	4.24238	0.000659564	0.0449892
Gm32790	-2.03919	-1.74266	3.83213	-0.621527	3.25723	1.24904	1.87364	0.934521	1.45585	4.07856	0.000664231	0.0449892
Zfp131	-2.40368	-2.34253	-6.0363	-0.428413	-1.12397	-3.49789	0.00600992	-6.0363	0.470233	4.23633	0.000667474	0.0449892
Frmd8	-2.62909	-1.69243	-0.760308	-0.0390845	1.25218	-2.62909	0.424873	1.18699	-0.599706	4.23622	0.000667627	0.0449892
Zkscan17	1.67965	-1.36762	-1.36762	2.47787	0.590948	2.99016	0.636874	-1.36762	-0.629728	4.34752	0.000668148	0.0449892
Gm773	-3.27983	-4.29916	-4.29916	-4.29916	-0.374435	-4.29916	-0.669712	-4.29916	-0.587696	4.68763	0.000671491	0.0449892
Ralgapa2	0.147926	2.70436	-0.870345	1.84096	3.73293	-0.870345	2.64228	-0.870345	-0.560959	4.34413	0.000672392	0.0449892
Pradc1	0.114295	-2.66322	-3.34576	0.239081	-0.294014	-5.22228	-0.391131	-1.68285	0.298908	4.14364	0.000673413	0.0449892
Kcnk4	-3.58716	-4.72082	0.804736	0.0349491	-1.14878	-4.72082	-3.08408	-0.108427	-0.0579741	4.23099	0.000674543	0.0449892
Armc3	-3.47364	-0.223923	-1.60085	-1.85352	-3.47364	-3.47364	-2.38599	-3.47364	-0.774784	4.48576	0.000676815	0.0449892
Rara	-0.778629	-1.55418	-5.18503	0.148276	-5.18503	-5.18503	-3.67267	-5.18503	-0.0713724	4.48274	0.000680406	0.0449892
Trmt13	1.87752	-1.79815	-0.239059	1.02983	-3.22706	-3.22706	1.01555	-1.52434	-0.259619	4.22559	0.000681767	0.0449892
Adgrg6	0	0	0	0	3.82703	0	0	0	-0.886457	6.1567	0.000682436	0.0449892
Ppip5k2	-1.5281	1.02822	-6.62872	-0.187616	-1.24191	-6.62872	0.652139	-6.62872	1.48151	4.33399	0.000685267	0.0450398
Ddr2	1.02443	0	0	3.12685	0	0	0	0	-0.897936	5.38818	0.000688262	0.0451008
Tm6sf1	-2.64551	1.32966	0.349745	-1.20836	1.10353	-2.64551	-1.00942	-2.64551	-0.654444	4.32603	0.000695549	0.0454418
Ttc25	3.44004	1.04118	-0.979166	1.83362	2.00078	-0.979166	3.00689	-0.979166	-0.543915	4.31962	0.000703948	0.0456603
Gm48957	0	0.942524	0	1.09205	3.7581	0	1.50665	0	-0.848195	4.65663	0.000705792	0.0456603
Uaca	-4.57747	-3.64289	-2.22278	-0.606709	-0.983502	-4.57747	-4.57747	-3.09681	-0.481522	4.31758	0.000706636	0.0456603
Peli2	-3.78472	0.204449	-3.78472	-0.376898	-1.53919	-1.25479	-2.70062	-3.78472	-0.58346	4.31711	0.000707263	0.0456603
Cd27	1.02475	0	0	0.583598	1.14033	0	3.00568	0	-0.921469	4.65255	0.000710451	0.0457308
Pias3	0.946339	-1.75614	-3.4036	-2.16621	-1.52547	-1.68252	-2.65214	-2.87984	0.870367	4.04289	0.000716815	0.0457475
Slc22a4	0	0.943268	0	0	2.95747	0	2.86381	0	-0.891613	4.92478	0.000716927	0.0457475
Kif16b	-3.62634	-2.19685	-3.62634	0.073428	-0.206523	1.47341	-1.12574	-3.62634	-0.473931	4.3083	0.000719022	0.0457475
Wdr31	-1.17096	-0.231819	-1.17096	1.19545	2.93517	1.65939	-0.0843778	1.14914	-0.723003	4.19858	0.000719096	0.0457475
Cebpb	1.02422	2.90608	0	0	0	0	0	0	-0.932167	5.33843	0.000731506	0.0464017
Grin2c	4.63809	3.06072	0	2.46532	4.32281	0	0	0	-0.516911	4.62916	0.000737746	0.0466388
Apaf1	2.00078	-0.980313	-0.980313	1.41785	-0.980313	3.10474	-0.980313	-0.980313	-0.783813	4.62767	0.000739517	0.0466388
Eml6	0.3054	-0.34436	-4.14522	0.0407208	-3.00499	-4.14522	2.3323	-2.52014	0.150734	4.17943	0.000746817	0.0469634
Hapln3	1.96081	0.943281	0	0	3.23767	0	0	0	-0.892374	4.88862	0.000755249	0.0470162
Ano1	-3.48332	-3.48332	-3.48332	-3.48332	-2.45699	-3.48332	-3.48332	-0.979396	-0.82522	4.88759	0.000756375	0.0470162
Marchf8	4.46276	4.79009	4.88915	6.14537	5.51667	0	1.09059	6.25243	0.562052	4.17086	0.000759588	0.0470162
Erich2	-1.96412	-3.33505	1.06929	2.19311	0.308889	-0.502263	-1.43858	-3.33505	-0.240204	4.17043	0.00076023	0.0470162
Tldc2	-0.87331	0.765475	-0.87331	-0.87331	-0.87331	-0.87331	-0.87331	3.70778	-0.73443	4.88147	0.000763085	0.0470162
Inpp4b	-1.15403	1.49421	-0.753988	-0.302257	4.15627	-4.88103	0.944087	-0.275948	1.43664	4.08196	0.000764744	0.0470162
Hvcn1	-0.875066	0.066874	1.46931	1.35735	0.151142	-0.875066	2.80715	-0.875066	-0.817681	4.27396	0.000766862	0.0470162
Fgd2	-4.93604	-0.778101	-4.93604	-2.55197	-0.746131	-4.93604	-4.93604	-4.93604	-0.395541	4.60146	0.000771489	0.0470162
Zfp507	1.65094	0.938276	0	3.35043	3.67729	3.75498	2.24052	1.60873	-0.665908	4.16299	0.000771508	0.0470162
Capn15	0.288474	-2.10051	-3.86439	1.23953	0.0873487	-3.86439	-2.78243	-2.25558	-0.265807	4.16219	0.000772739	0.0470162
Cdkl3	-5.04495	-0.364028	-6.17987	-2.14812	-5.03954	-6.17987	-0.267492	-6.17987	0.396563	4.2698	0.000772878	0.0470162
Adgb	0	2.89612	0	0	3.23313	0	3.23779	2.26214	-0.786261	4.59844	0.000775267	0.0470162
Alg9	2.28899	-2.37895	-2.37895	0.46239	-2.37895	-2.37895	-0.964307	-0.0144819	-0.593845	4.40806	0.000775667	0.0470162
Dtnb	0.413541	2.10141	-3.00575	0.872587	0.787302	-1.98256	1.26234	-3.39511	0.911383	4.00253	0.000781462	0.0471488
Catsper2	-3.19771	-4.59333	-0.406637	-4.59333	-4.59333	-4.59333	-2.60919	-2.16142	-0.565261	4.40331	0.000782177	0.0471488
Sgk2	0	3.1112	0	0	0	0	0	0	-0.930299	6.0114	0.00078513	0.0471965
Gcfc2	-1.6754	-1.75718	-0.824721	0.869744	-2.69781	-2.69781	-2.69781	-2.69781	-0.783867	4.39634	0.000791837	0.0473719
Lrrc9	-0.871851	3.57728	5.17817	3.3267	2.35517	-0.871851	3.70184	1.45431	-0.11422	4.1495	0.000792389	0.0473719
LOC118567558	-3.47658	-2.5342	-1.60158	-3.47658	-3.47658	-3.47658	-3.47658	-1.77933	-0.839608	4.58077	0.000797762	0.0475628
Vwa1	0	2.03776	0	0	1.0273	0	2.70459	0	-0.929447	4.84474	0.000804705	0.0477397
Sp110	-4.28708	-4.28708	-4.28708	-1.08577	-0.231804	-4.28708	-4.28708	-4.28708	-0.594349	4.84286	0.0008069	0.0477397
Igdcc3	2.77691	2.68567	0	1.2294	0	0	1.09012	0	-0.884305	4.57292	0.00080796	0.0477397
Wdr35	-0.617342	0.280821	-2.69101	0.328133	-0.735981	-2.69101	2.52851	-0.32646	-0.45093	4.13681	0.000812563	0.0477397
Zfp78	0.194995	2.17535	-1.17396	0.687771	0.783189	-1.17396	-1.17396	3.67597	-0.566077	4.24197	0.000814386	0.0477397
Slc38a10	0.869506	-0.558372	-5.78756	-1.54247	-0.323957	-1.4691	-4.28234	-4.09768	0.647375	4.05094	0.00081538	0.0477397
Pter	-5.88898	-2.08265	-4.01964	-1.93748	-5.88898	-5.88898	-2.01471	-4.40655	-0.116025	4.24089	0.000816044	0.0477397
Ipcef1	-1.71354	-2.8479	-2.8479	-1.92667	0.975475	-2.8479	-2.8479	-2.8479	-0.805267	4.56283	0.000821285	0.0479178
Zfp69	3.86113	2.39956	0	2.83717	3.83891	0	1.08582	0	-0.666197	4.37148	0.000827302	0.0481402
Mdm1	1.13243	1.41543	-1.64365	2.2101	3.32986	-1.64365	-1.64365	-1.64365	-0.482347	4.36996	0.00082951	0.0481403
Gm4951	-3.82646	-2.22045	0.683102	-1.90126	-3.82646	-3.82646	-3.82646	-3.82646	-0.663962	4.55237	0.000835352	0.0483507
Bend3	0.976824	-1.01842	-3.41527	-2.83712	-2.39164	-3.41527	-0.723436	-3.41527	-0.620275	4.22499	0.00084083	0.0484969
Bean1	4.53445	3.76209	0	2.39099	1.7838	0	1.41487	0	-0.575771	4.35906	0.000845621	0.0484969
Dnah2	1.13485	2.88669	0	4.50636	0	0	3.11772	1.6257	-0.619366	4.35854	0.00084641	0.0484969
Igsf9	-3.79419	-3.79419	-3.79419	-2.87148	0.310756	-3.79419	-3.79419	-2.09446	-0.68963	4.54401	0.000846768	0.0484969
Sytl3	0	0	0	2.07967	0	0	3.44009	0	-0.882626	5.21609	0.000850823	0.0486016
Rp2	4.238	2.85776	2.11732	1.7303	1.62074	-0.869093	2.73612	-0.869093	-0.403055	4.11178	0.000853917	0.048651
Exph5	-0.433905	-0.515118	0.417529	-1.45788	1.22185	-1.45788	1.5457	-1.45788	-0.862327	4.21396	0.000858497	0.0486663
Sytl2	-1.51407	-1.33496	-6.19709	-0.422378	-3.86347	-3.65863	-1.89196	-6.19709	0.400712	4.109	0.000858646	0.0486663
Zfp354a	-1.72688	0.492422	1.98851	2.11346	-2.06688	-3.09168	-3.09168	2.402	-0.0216743	4.10464	0.000866101	0.0489616
Anks6	2.46224	0	0	0	3.68606	0	1.64183	0	-0.844001	4.78808	0.000873696	0.0490682
Ttll6	0	2.68919	0	0.584157	0	0	0	0	-0.954982	5.19223	0.000876447	0.0490682
Ndst3	-3.25223	-1.76176	-5.10525	-2.17999	-3.43785	-5.10525	-2.41941	-5.10525	-0.444304	4.20187	0.00087829	0.0490682
Clasrp	-3.1715	-4.30416	-4.30416	-4.30416	-0.0655988	-4.30416	0.0687636	-2.6088	-0.477779	4.33623	0.000880437	0.0490682
1700016H13Rik	-2.54146	-1.60212	-2.54146	-0.718859	-2.54146	-2.54146	1.79283	-2.54146	-0.733265	4.51928	0.000881502	0.0490682
Cep128	4.3944	4.41989	1.86705	3.47249	0	0	0	0	-0.506783	4.51655	0.000885425	0.0490682
Deaf1	-1.41699	1.32845	-2.80668	2.83918	2.56689	-2.80668	1.50268	-1.10788	0.01858	4.09225	0.000887674	0.0490682
Ptprc	0	0.941035	0	3.322	3.42238	0	1.08826	1.48506	-0.795865	4.33072	0.00088906	0.0490682
Catsperg2	3.16432	0	0	4.52362	0	0	0	0	-0.658048	5.17952	0.000890439	0.0490682
Tsks	0.0518077	3.67746	-1.31556	3.02395	4.05986	1.21545	2.97731	-1.31556	-0.112185	4.09067	0.000890473	0.0490682
Catsperd	0	3.23689	0	0.919939	0	0	0	0	-0.917287	5.17018	0.000900879	0.0494659
Fcho1	0.133289	0.0746494	-6.7148	-2.1872	-2.2094	-1.83019	0.06823	-5.02652	1.25227	4.00144	0.00090338	0.0494659
Clmp	0.843606	-3.41101	-3.41101	0.0198246	1.00893	1.91012	-0.424276	-3.41101	-0.257516	4.18629	0.000904491	0.0494659
Slc12a8	1.39315	1.1702	-2.50056	-0.379266	3.23515	-2.50056	1.86692	-2.50056	-0.183268	4.18482	0.000906994	0.0494788
Greb1l	1.56488	0	1.87363	0	3.23387	4.04175	0	1.69137	-0.798235	4.3177	0.000909788	0.0495075
Irak2	-0.518984	2.13809	-1.53997	-1.53997	1.57379	-1.53997	1.37046	1.34663	-0.695391	4.18085	0.000913835	0.0495146
Pde7a	-1.64234	-1.64234	-1.64234	-1.64234	1.78791	-1.64234	-1.64234	2.98472	-0.667994	4.75627	0.000915173	0.0495146
Acnat1	-2.14599	-3.79848	-1.92581	-3.79848	-2.08486	-3.79848	-3.79848	-2.31396	-0.771062	4.31341	0.000916727	0.0495146
Rai14	0.778427	-0.872957	-0.872957	1.81244	3.4071	-0.872957	0.213362	1.63398	-0.705864	4.1772	0.000920146	0.0495765
C1qtnf1	-0.980873	-0.980873	-0.980873	-0.980873	2.45835	-0.980873	-0.980873	0.715896	-0.883189	4.75018	0.000923339	0.0496261
Gm30515	0.866143	-0.264003	-3.24584	-2.32341	-3.24584	-0.414778	-2.16116	-3.24584	-0.645721	4.17009	0.000932594	0.0498595
Mfap3l	1.55925	-0.755217	-3.72497	-0.565654	0.429435	-5.60197	-0.320704	0.619413	1.04282	3.98487	0.000934972	0.0498595
Dcdc5	0.527359	-2.67016	-2.67016	-0.61155	0.305164	-2.67016	-2.67016	2.8544	-0.375888	4.30158	0.000936142	0.0498595
Fam178b	3.81661	0	0	0.58259	0	0	0	0	-0.852367	5.13888	0.000936822	0.0498595
Plce1	1.02363	3.41439	0	2.28325	1.58274	0	0	1.60865	-0.833668	4.29712	0.000943573	0.0499676
Psg19	0	3.08482	0	0	0	0	0	0	-0.938494	5.82383	0.000943808	0.0499676
Ano8	-2.64927	0.990229	-4.02263	-3.09681	0.842649	-4.02263	-4.02263	-4.02263	-0.354882	4.29584	0.000945722	0.0499676
Robo3	0	3.23358	0	0	3.13408	0	1.50661	0	-0.849762	4.73213	0.000948019	0.0499679
Nfam1	-3.15155	-3.15155	2.37245	-0.810294	-3.15155	-3.15155	-3.15155	-3.15155	-0.601506	4.7289	0.000952519	0.0500842
Sirt4	-1.18935	-1.18935	-1.18935	-1.18935	2.15392	-1.18935	-0.0989996	-1.18935	-0.898714	4.72048	0.000964333	0.0505834
Gm34978	0	0	0	2.39011	2.69811	0	0	2.81375	-0.848196	4.87929	0.000968407	0.0506753
Hyal1	0.0107829	-1.43652	-3.46403	-2.02507	-0.789643	-3.46403	-3.46403	-3.46403	-0.719654	4.28103	0.0009709	0.0506842
Gemin5	-4.00142	-0.136987	-1.65896	2.0795	0.889306	1.80829	-0.114393	-2.31135	0.254237	3.96305	0.000978291	0.0509482
Cdc42ep5	-2.10597	-3.67089	-1.09989	-2.44457	-3.67089	-3.67089	-2.03076	-3.67089	-0.799052	4.27438	0.000982434	0.0510093
Dennd4b	0.81044	-1.0307	-5.53332	-0.400952	0.589392	-2.99509	-0.263413	-3.92469	0.672752	3.96018	0.00098414	0.0510093
Zbbx	0	0	0	2.81759	0	0	1.09049	1.48677	-0.906875	4.70109	0.000992124	0.0511805
Abcb4	0	2.0356	0	2.70743	2.72869	0	0	0	-0.873893	4.70109	0.000992134	0.0511805
Reep4	0	2.68637	0	2.2416	0	0	1.64307	0	-0.899334	4.69856	0.000995812	0.051195
Slc35d1	-1.29297	-2.81039	-4.82977	-2.89953	-4.82977	-4.82977	-2.32789	-3.12778	-0.512796	4.13381	0.000998852	0.051195
Dnah12	-0.871724	2.19383	-0.871724	2.59415	1.6063	-0.871724	3.52636	0.753983	-0.616294	4.13349	0.000999452	0.051195
Cdhr3	1.02436	3.08242	0	1.22964	0	0	2.29258	0	-0.892778	4.43435	0.00101262	0.0517481
Tle2	-1.27463	-0.637651	3.34707	1.26271	0.994539	-3.8006	1.47321	-2.17575	0.490901	3.94387	0.00101808	0.0519052
Zdhhc23	-2.52536	-3.65991	-3.65991	-3.65991	-3.65991	-3.65991	-2.57064	-2.05125	-0.826295	4.42884	0.00102182	0.0519747
Trim34a	-1.45667	-1.45667	-1.45667	1.51514	1.6977	-1.45667	1.05577	0.0284394	-0.797723	4.247	0.00103142	0.052341
Pax7	2.39913	3.26687	0	1.9049	1.02495	4.49981	0	0	-0.744388	4.24486	0.00103536	0.0524192
Smagp	-0.875227	0.0669493	-0.875227	0.195492	1.1622	2.02499	2.56294	-0.875227	-0.826247	4.11364	0.00103778	0.0524201
Crispld2	-3.4256	-3.4256	-3.4256	-3.4256	-3.4256	-3.4256	-3.4256	-1.93929	-0.86853	5.05088	0.00104642	0.0527082
Kcnj4	-3.00294	-1.38943	-2.15287	-4.02407	-4.02407	-4.02407	-1.5254	-4.02407	-0.708677	4.23666	0.00105058	0.0527082
Pcp2	4.06607	2.48077	-1.32164	-1.32164	-1.32164	-1.32164	-1.32164	-1.32164	-0.481605	4.66111	0.00105217	0.0527082
Fbxl22	0.521668	3.35752	1.69313	0.564036	0.706653	-0.871943	0.213059	2.98802	-0.629572	3.93186	0.00105496	0.0527082
Itpr1	-0.412484	-2.19995	-3.17045	0.307179	-2.26793	-5.38171	-1.25237	-6.83838	2.38742	3.86173	0.00105736	0.0527082
Tsku	3.20872	2.00662	0.995707	2.9004	0.270756	-0.868818	-0.868818	4.52009	-0.318611	4.00412	0.00105798	0.0527082
Pfkfb4	-0.979793	2.00351	0.89081	2.79426	-0.979793	-0.979793	2.61905	0.720107	-0.670694	4.10004	0.0010649	0.0528938
Kdm6a	2.92536	1.06819	0.478509	2.45881	1.33833	4.3178	-0.0754272	-1.59394	0.556862	3.85691	0.00106838	0.0528938
Il10ra	-1.79247	-0.849656	0.0829964	-1.79247	1.3283	-1.79247	-0.702636	-0.102126	-0.865963	4.10242	0.00107003	0.0528938
Tgif1	-0.980256	-0.980256	-0.980256	2.38944	0.159871	-0.980256	2.31899	0.71157	-0.775516	4.22335	0.0010758	0.0528938
Trp53i13	2.50038	2.69138	0.670778	0.768877	0.733497	-1.19795	-0.48628	-1.66764	0.805753	3.85359	0.00107605	0.0528938
Pdzd2	-2.647	-2.23164	-3.667	-0.0193381	-0.643051	-3.667	-2.0306	-3.667	-0.665488	4.09446	0.00107625	0.0528938
Matn2	-3.47632	-2.53415	-3.47632	-3.47632	-3.47632	-3.47632	-2.38706	-1.04717	-0.825322	4.3952	0.00107982	0.0528967
Naaa	1.43935	-2.26046	0.303712	1.53613	0.507948	-2.26046	0.0211614	-2.26046	-0.604921	4.09206	0.00108116	0.0528967
Gm9278	0	0	0	1.44591	0	2.53767	3.33582	0	-0.880374	6.28918	0.00108394	0.0529141
Sema4c	0.147816	3.78169	3.94644	2.93459	2.72135	-0.86866	2.49908	-0.86866	-0.359319	3.98886	0.00109072	0.0531261
Mro	-4.20437	-4.20437	-1.85739	-4.20437	-4.20437	-4.20437	-4.20437	-4.20437	-0.766178	5.01427	0.00109602	0.0532359
Fancc	3.67503	3.46561	2.06007	3.89364	3.78103	1.66178	5.43993	0.61061	0.22646	3.84428	0.00109785	0.0532359
Osbpl3	0.515398	1.42868	3.13798	2.95624	-1.45209	1.07611	0.0647671	0.156709	-0.492668	3.90587	0.00110184	0.0533107
Gtpbp2	-0.78825	1.95794	-3.4003	-0.0405703	-0.424623	-0.87423	-3.4003	-3.4003	-0.391093	4.07825	0.00110991	0.0535825
Zfp951	1.13375	3.07056	1.87122	3.51115	0	2.53289	3.43147	0	-0.709475	4.07276	0.00112154	0.0540247
Tmem200a	-0.870513	-0.870513	1.69129	2.37808	3.17543	2.03713	3.73156	0.755417	-0.519552	3.96928	0.00113426	0.0543242
Cacna1c	-1.06956	-2.97436	-6.87244	-1.11947	-2.19721	-9.18172	-3.89047	-3.29139	2.53778	3.8919	0.00113437	0.0543242
Ermard	-1.38726	-5.69196	-5.69196	-1.01546	-3.93149	-5.69196	-1.24316	1.52548	0.651878	4.06638	0.00113523	0.0543242
Smtn	-2.7164	-0.0794258	-2.7164	-2.7164	-1.68957	-2.7164	-2.7164	-2.7164	-0.882866	4.60468	0.00114354	0.0546021
Kcnj5	-2.09795	0.11152	-3.12166	-3.12166	-3.12166	-3.12166	-3.12166	-3.12166	-0.840886	4.60129	0.00114929	0.0546412
Myh14	-2.73606	-0.532664	-4.10583	-3.02374	0.337956	-4.10583	-4.10583	-2.49705	-0.526252	4.05987	0.00114937	0.0546412
Itgb3	-0.768019	1.6918	-1.79094	-1.79094	-1.79094	-1.79094	1.47801	-1.79094	-0.803318	4.35494	0.00115381	0.0547334
Gm4027	-3.36436	-3.36436	-3.36436	-3.36436	-3.36436	-3.36436	-3.36436	-3.36436	-0.887269	5.61687	0.0011612	0.0549644
Plk5	-4.40826	-4.40826	-4.40826	-2.1823	-2.738	-4.40826	-4.40826	-4.40826	-0.715733	4.5891	0.00117023	0.0551722
Fam214a	-0.514901	0.908262	0.485628	1.38779	-3.43845	-3.43845	2.23148	1.96705	0.151178	3.95271	0.00117249	0.0551722
Socs2	3.2636	1.60031	-1.17589	3.48123	-0.153935	-1.17589	-1.17589	0.526875	-0.450857	4.0491	0.00117318	0.0551722
Lrrc8c	0.958809	1.05007	-0.980271	2.30875	-0.980271	-0.980271	2.082	-0.980271	-0.777872	4.17131	0.00118057	0.0552767
Pxdn	-1.14678	-2.05343	-2.99645	-2.41351	-2.99645	-2.99645	-1.90643	-2.99645	-0.877789	4.46573	0.00118269	0.0552767
Nog	1.9372	2.68739	0	0	1.02721	0	1.09072	0	-0.920526	4.3398	0.00118301	0.0552767
Mtx3	-4.6726	-0.560686	-1.73677	1.00893	-0.0595858	-4.6726	-4.6726	1.11543	0.227309	4.0436	0.00118553	0.0552767
Zfp13	-0.570874	-3.18946	-0.991309	-3.45401	-1.74068	-4.34433	-2.77064	-4.63296	0.757929	3.80303	0.0012	0.0558321
Abcb10	2.04613	0.0659341	-0.873057	1.95442	2.95258	-0.873057	1.27963	-0.873057	-0.714662	4.03602	0.00120277	0.0558418
Sag	0.518196	-0.87304	0.998247	2.02556	3.25025	-0.87304	1.98252	-0.87304	-0.713203	4.03107	0.00121418	0.0559221
Plekhh2	1.38681	0	0	3.68462	0	0	0	1.48569	-0.818203	4.56132	0.00121947	0.0559221
Ccdc162	0	0	0	0	3.44045	0	0	0	-0.918522	5.5685	0.00121964	0.0559221
Lrba	2.08017	3.04139	-2.34939	1.42628	0.814321	2.454	-1.20585	1.86007	1.68604	3.79477	0.00122158	0.0559221
Timeless	-2.91787	-0.0261396	-1.04651	0.760347	-2.91787	-0.384833	-2.91787	-2.91787	-0.717073	4.15013	0.00122618	0.0559221
Arhgef6	4.02524	0.939696	2.73298	2.02369	1.02501	0	0	0	-0.749749	4.14995	0.00122658	0.0559221
Tuft1	0.260167	1.5303	-0.873915	2.68063	-0.873915	-0.873915	1.60478	0.610613	-0.771472	4.02565	0.00122679	0.0559221
Drc7	0	3.08185	0	2.40073	1.14029	0	0	0	-0.88109	4.55657	0.0012281	0.0559221
Arhgef33	-2.93604	0.829808	0.368076	-2.01278	-2.93604	-2.93604	1.09382	-2.93604	-0.636981	4.14679	0.00123354	0.0559221
Ppp1r42	0	2.23916	3.55697	1.66746	1.67221	0	1.64197	0	-0.850944	4.14677	0.00123359	0.0559221
Rhoq	1.49948	-0.620187	-0.521162	-0.129092	0.617609	-0.793896	-0.0864918	-4.09507	0.0267944	3.8512	0.00123485	0.0559221
Serhl	-2.38284	-2.38284	-2.38284	-0.599611	-0.622838	1.70485	-2.38284	-2.38284	-0.817645	4.31364	0.00123525	0.0559221
Hgf	-3.66038	-3.66038	-1.78518	-3.66038	-3.66038	-3.66038	-3.66038	-3.66038	-0.850815	4.91623	0.00124177	0.0559919
Gramd2	-1.37171	-1.37171	0.973575	0.4089	1.16708	1.16394	1.87608	-1.37171	-0.802924	4.01922	0.00124193	0.0559919
Rmdn2	-3.8034	-4.93783	-4.93783	0.309256	0.889404	-4.93783	-0.149473	-2.57354	0.130302	4.01414	0.00125403	0.0564112
Ppp1r37	0	0.942571	0	1.70652	0	4.08897	1.98225	0	-0.851067	5.48964	0.00125758	0.0564112
Chrd	1.02408	0	0	2.90777	1.02673	2.53749	0	1.60864	-0.871243	4.13491	0.0012601	0.0564112
D930020B18Rik	0	2.68796	0	0	2.25487	0	0	0	-0.931796	4.90387	0.00126157	0.0564112
C4a	-2.20185	-0.171805	0.367814	0.372788	1.37325	-2.20185	-1.11424	-2.20185	-0.773028	4.00777	0.00126935	0.0566433
Slc9a5	-0.564643	-3.87204	-6.75248	-2.1502	-1.72108	-6.75248	-2.526	-5.12762	0.598559	3.90724	0.00128434	0.057169
BC024978	1.65829	0.684325	-1.71541	-1.13627	1.74086	2.36509	0.437613	-1.71541	-0.672193	3.90645	0.00128637	0.057169
Catsperg1	3.54308	0	0	1.23659	0	0	0	0	-0.871704	4.88704	0.0012891	0.0571737
Aptx	-1.53895	-1.86815	0.751771	-1.72933	0.584605	-5.03139	1.037	-5.03139	0.331145	3.90089	0.0013008	0.0575754
Jmjd4	-1.19277	2.28257	-1.19277	1.5927	-1.19277	1.63692	0.21941	-1.19277	-0.777024	4.11194	0.00131315	0.0579114
Dennd1b	-2.8408	-0.193486	-3.85764	0.181911	0.933995	-3.85764	-2.77646	-2.37804	-0.394633	3.89543	0.00131514	0.0579114
Sema3b	-1.19188	-0.250687	-1.19188	1.60601	2.69479	-1.19188	-1.19188	-1.19188	-0.800082	4.27514	0.00131663	0.0579114
Gm14685	4.1487	0	0	0	0	0	0	0	-0.811621	5.49038	0.00132101	0.0579114
Gbp3	1.13421	2.40547	0	2.59806	3.48952	0	2.6986	0	-0.788632	4.10769	0.00132319	0.0579114
Tfip11	-1.85465	-2.05149	-1.1194	-0.201215	1.09535	-0.457891	-1.90371	0.668018	-0.580239	4.11245	0.00132472	0.0579114
Gm33763	3.37927	3.47549	0	0	3.88153	0	0	1.60873	-0.697635	4.27042	0.00132697	0.0579114
Trip10	1.38554	1.77961	1.41474	-0.925898	0.0114332	0.354348	-2.93429	-2.93429	-0.34758	3.88705	0.00133744	0.0581686
Phactr4	-1.57337	0.0550901	-2.94617	0.780387	1.56728	-2.94617	-2.94617	1.52881	-0.387009	3.97919	0.00134058	0.0581686
Ccnl2	1.52584	-1.45254	-0.726071	1.24395	1.73896	0.304325	1.51938	-3.22475	-0.0631237	3.8107	0.00134391	0.0581686
Ddx60	-2.45963	-1.17149	-1.97684	-2.92734	-3.84929	-3.84929	-3.84929	-3.84929	-0.763519	4.09791	0.00134666	0.0581686
Tpsg1	-2.45296	-0.457638	-3.81722	-3.23694	-3.81722	-3.81722	-3.81722	-3.81722	-0.752157	4.26128	0.00134726	0.0581686
Il18	0.0409079	-0.979778	-0.979778	3.16319	-0.979778	-0.979778	2.95701	-0.979778	-0.665634	4.26057	0.00134885	0.0581686
Met	1.13498	0	0	0	0	0	3.00604	0	-0.930714	4.84607	0.00135882	0.058483
Col25a1	-1.62256	-0.246354	-5.56248	0.163917	2.40649	-7.45347	-0.997349	-1.78042	2.55642	3.80363	0.00136393	0.058587
Dnah9	-1.33806	-1.44988	-3.42786	-0.122788	-4.27407	-5.2987	-5.2987	-3.03823	-0.0951192	3.87515	0.00136982	0.0586232
Gfap	-1.45997	-3.32032	-5.08703	-1.49717	-4.06429	-1.42568	-2.28149	-0.478189	-0.183561	3.80145	0.00137014	0.0586232
Pdss1	-2.4052	-2.98933	-5.01126	-3.09074	-3.27827	-3.96417	-2.62499	-7.49607	0.581207	3.79932	0.00137626	0.05877
Dcdc2a	3.45917	3.0807	0.888613	2.25597	0.0437137	-0.979201	-0.979201	-0.979201	-0.552954	3.96412	0.00137978	0.058805
Slitrk2	-2.39197	-0.979312	-2.63346	-3.25781	-1.7754	-5.94397	-2.06224	-4.33528	0.0656768	3.79568	0.0013868	0.058989
Kif21b	-1.85438	-1.47253	-3.24568	-0.435414	0.457419	-3.24568	-3.24568	-3.24568	-0.710788	4.08007	0.00139058	0.0590349
Serpinb1a	3.67972	0	0	3.41417	1.57994	0	2.69521	0	-0.712559	4.23871	0.00139877	0.0590742
Fgf11	-2.99076	-4.54799	-0.641291	-1.44237	-0.930056	-4.54799	-1.43592	-3.06758	-0.463357	3.86444	0.00139963	0.0590742
Sycp2	0	0	0	0.955223	2.99168	2.53743	1.08987	2.3501	-0.868236	4.07598	0.00140087	0.0590742
Tlr1	-0.875601	-0.875601	-0.875601	0.0449	-0.875601	-0.875601	-0.875601	2.81592	-0.860348	4.46764	0.00140234	0.0590742
Nsun6	1.51523	-1.29353	1.91963	-0.0457551	-0.101461	-4.70947	0.309189	-3.08462	0.550608	3.78873	0.0014071	0.0591607
Gm20208	0.313679	-1.53865	-1.53865	1.74186	1.0429	-1.53865	-0.45504	3.18699	-0.553166	3.94861	0.00142138	0.0594395
Triobp	-2.00655	-0.0828359	-0.202775	-0.110499	2.37731	-3.13895	0.952067	-1.53014	-0.286655	3.78304	0.00142398	0.0594395
Uty	-0.0952559	1.28511	-5.22046	-1.58517	-1.75123	-5.22046	-5.22046	-5.22046	0.282705	4.06593	0.00142646	0.0594395
Efhc2	1.02123	4.87127	0	1.97548	0	0	0	0	-0.716068	4.45619	0.00142661	0.0594395
Klhl15	-2.01217	-2.54324	-0.867135	-3.93005	-5.54169	-5.54169	-1.27085	-3.84012	-0.169	3.85454	0.00142777	0.0594395
Stxbp4	0.219716	2.78279	-0.0603849	0.62205	1.81748	0.904225	-1.92797	-1.92797	-0.540365	3.85374	0.00143008	0.0594395
Arhgap17	-1.30761	-0.886871	0.68915	-3.10393	-0.588826	-4.91816	-2.93423	-4.91816	-0.133286	3.85112	0.00143764	0.0595788
Ankrd10	-2.33107	-0.197096	-3.54873	0.358746	0.237036	-6.0325	1.18655	-3.70625	1.02543	3.77732	0.00144114	0.0595788
Kctd18	-2.32018	-0.524943	-3.33079	-2.25896	-0.303168	-5.20244	-0.429441	-3.50317	-0.022518	3.77716	0.00144162	0.0595788
Zfp583	-0.270895	-4.87975	-2.52811	-0.607273	-4.87975	0.347478	-3.79525	-3.17883	-0.131642	3.84772	0.00144751	0.0596219
Nagpa	0	0	0	1.66299	2.82284	0	2.70232	1.697	-0.863108	4.21509	0.00145492	0.0596219
Lhx9	-0.997248	-3.43376	0.0940835	1.09571	-0.869054	-2.33828	-4.87444	-3.17678	0.133894	3.77251	0.00145572	0.0596219
Adamts9	-1.71285	-2.84688	-2.84688	-1.61098	1.08418	-0.312701	-1.75952	-2.84688	-0.763166	3.93595	0.00145629	0.0596219
Frs2	0.606648	-1.90249	2.17205	-0.556469	0.781245	2.0368	-1.75432	-1.22656	-0.385285	3.71349	0.00145633	0.0596219
Fsip1	1.37281	0	0	3.34177	0	0	4.47809	5.34442	-0.386572	4.21284	0.00146037	0.0596757
Gm29890	1.13364	0	0	4.72539	0	0	0	1.60873	-0.677791	4.43667	0.00146903	0.0599174
Blm	2.61825	2.40041	0	4.32625	0	0	0	0	-0.69288	4.43528	0.0014721	0.0599305
Hnf1b	-0.964791	1.0078	-1.9893	-1.40597	-1.9893	-1.9893	-1.9893	-1.9893	-0.904227	4.20511	0.00147933	0.0601124
Gm27162	0	0	0	0	1.02737	0	2.91843	0	-0.936028	5.74758	0.00148439	0.0602059
Gm4796	0.800564	0.515646	-2.64099	1.70843	-0.974297	-2.64099	0.489224	1.75097	-0.364461	4.06172	0.00149311	0.0603962
Crybg1	-0.980651	2.78726	-0.980651	1.42369	-0.980651	-0.980651	0.108572	-0.980651	-0.822849	4.19895	0.00149461	0.0603962
Prdm16	-3.87362	0.239442	-2.30322	-1.26418	-1.03711	-5.23925	-4.1531	-5.23925	-0.0524909	3.82918	0.00150255	0.0606049
Zfp385c	-1.0682	-1.28595	-2.71679	2.07929	-0.611614	-2.71679	-0.440749	-1.02191	-0.523561	3.82337	0.00152023	0.0612046
Rad51b	-4.81103	-1.09981	-1.31307	-1.64484	-0.475243	-5.83568	-5.83568	0.774185	0.513871	3.82188	0.00152482	0.0612763
Mical1	0	3.67404	0	1.39928	3.33105	0	0	4.58034	-0.599201	4.18447	0.0015312	0.0614198
2610318N02Rik	0.621785	-2.44987	1.45546	1.15773	-3.38721	-3.38721	2.25361	-3.38721	-0.109208	3.90723	0.00153877	0.0615128
Fam163a	2.44002	0	0	0.582637	3.23656	0	2.51521	0	-0.855879	4.18137	0.00153916	0.0615128
Epb41l4b	0.166141	-1.26971	-5.1709	-0.254084	0.102508	-1.08216	-5.1709	-3.68487	0.186893	3.81443	0.00154789	0.0617487
Ttc39a	0.778326	2.19559	-0.872327	3.12138	-0.872327	-0.872327	2.87282	-0.872327	-0.650547	4.01774	0.0015561	0.0619629
Atp10b	-0.875578	1.15947	2.68165	0.830952	1.37766	-0.875578	-0.875578	-0.875578	-0.858373	4.08	0.00157683	0.062674
Ttll9	0.548924	-0.203186	-1.1164	-3.21755	-0.68476	-5.03725	-5.03725	-5.03725	0.0525324	3.89112	0.00158712	0.0627693
DXBay18	3.94242	0	0	0	0	0	0	0	-0.840687	5.3099	0.00159263	0.0627693
Dipk1c	1.25129	1.18874	-2.80099	-0.424631	-2.80099	-2.80099	-2.80099	-1.31896	-0.596627	4.00468	0.0015933	0.0627693
Cfap61	2.98209	1.83813	-1.95596	1.61216	-1.95596	-1.95596	2.18301	-0.476732	-0.355573	3.88909	0.00159336	0.0627693
Mmp23	0.223432	1.82363	4.68363	2.6039	2.41286	-1.17723	0.239881	0.431601	-0.362243	3.72933	0.00159366	0.0627693
Crhr1	-4.23718	-0.661675	-4.23718	-3.01847	-1.14956	-4.23718	-0.626477	-4.23718	-0.576865	4.00324	0.00159744	0.0627693
Atp9b	-4.01405	-0.905499	-0.281503	-2.36403	-0.0620714	-5.03305	-3.51769	-3.55144	-0.162981	3.72763	0.00159936	0.0627693
LOC115490435	-1.51964	2.64301	1.40383	1.23225	1.11738	0.452651	1.05318	-2.53702	-0.273527	3.7253	0.00160721	0.0629639
Gm13707	0.613695	-1.52385	-1.53826	0.613654	-0.234003	-5.46595	0.17988	-5.46595	0.654323	3.79361	0.00161425	0.0631265
Cep78	1.00762	2.06264	0.669642	0.698925	3.17427	2.86858	2.04042	-1.19812	-0.550271	3.72106	0.00162155	0.0632193
Dydc2	1.13454	2.68322	0	2.67113	0	0	1.08927	2.7272	-0.826031	3.99467	0.00162242	0.0632193
Wipf3	-3.06195	-1.28091	-3.06195	-2.1417	-2.03509	-3.06195	-3.06195	-3.06195	-0.886007	4.1473	0.00162949	0.0633816
B3galt5	0.285095	-2.0181	-2.95447	0.109498	1.61029	-2.95447	-2.95447	-2.95447	-0.585284	3.98895	0.00163932	0.0636506
Mgmt	0.148139	2.60256	3.85891	3.99622	1.80096	-0.872847	4.43905	3.89978	-0.0512966	3.71452	0.001644	0.0637188
Nlgn4l	-3.2933	-3.2933	-3.2933	-2.71009	-3.2933	-3.2933	-3.2933	-3.2933	-0.896714	4.69648	0.00165007	0.0638407
Pus7	0.342198	0.89992	-2.32143	1.09011	-0.440867	-4.19354	-1.51258	-4.19354	0.00105766	3.78117	0.0016553	0.0639297
Npy5r	-3.51865	-4.65236	-2.30343	-4.65236	-4.65236	-4.65236	-3.2391	-4.65236	-0.698022	4.13641	0.0016595	0.0639787
Tepsin	1.00304	-1.17108	-1.17108	1.0549	3.20965	-1.17108	0.340243	-1.17108	-0.71626	3.97936	0.00166805	0.0641947
Fbn1	-1.19458	-2.69092	-3.63186	-3.63186	-2.05025	-3.63186	-3.63186	-2.14686	-0.793278	3.97384	0.00168485	0.0647271
Aven	1.19211	-0.859211	-2.87838	-1.79883	-2.87838	-2.87838	1.69707	-0.0521375	-0.505322	3.85855	0.00168977	0.0647474
Cep70	-3.32642	0.119265	-4.69785	-2.93729	-4.69785	-4.69785	0.174558	-2.43858	-0.26081	3.85808	0.00169131	0.0647474
Ssh1	-3.20312	-0.625835	-4.22041	-0.0690387	-0.714048	-4.22041	-3.1387	-1.65312	-0.431674	3.7695	0.00169479	0.0647672
Tbc1d32	0.0210307	0.269203	-1.36967	-1.36967	0.665344	3.17248	0.916237	0.329581	-0.732925	3.76843	0.00169848	0.0647945
Stk33	4.81029	2.94792	-0.979814	3.51771	3.94923	-0.979814	-0.979814	-0.979814	-0.0627527	3.96807	0.00170256	0.0648368
Mrvi1	-0.876738	1.68383	-0.876738	-0.876738	-0.876738	-0.876738	0.214495	-0.876738	-0.949324	4.7029	0.0017079	0.0649268
Meig1	2.04109	-1.36915	-1.36915	0.628983	-1.36915	-1.36915	2.52565	0.330426	-0.70522	3.96037	0.00172653	0.0651275
Stard13	-4.27487	0.165299	-2.40215	0.240791	1.39835	-1.37262	0.420889	-4.27487	0.0355184	3.75981	0.00172831	0.0651275
Relb	4.21482	2.88108	-1.20196	1.51887	2.71183	-1.20196	-1.20196	-1.20196	-0.346251	3.9594	0.00172956	0.0651275
Pdzk1ip1	-3.47133	-3.55524	-4.48792	-0.759395	-2.82118	-4.48792	0.871002	-3.00855	-0.371289	3.75891	0.00173144	0.0651275
Lzts1	-2.23855	-3.89117	-3.89117	-1.80565	-3.89117	-3.89117	-2.80347	-3.89117	-0.776713	4.1094	0.0017365	0.0651275
Mcph1	2.67677	1.69143	-1.19616	2.61731	-1.19616	-1.19616	-0.111784	0.286457	-0.633228	3.84316	0.00174062	0.0651275
Als2cl	2.68322	2.04583	-1.35535	1.157	2.09346	-3.23177	-2.14116	3.10426	0.51138	3.68716	0.00174125	0.0651275
Mcf2	0.421919	1.19739	-3.10787	-2.0833	-1.42843	-4.98344	-0.668265	-4.98344	0.222792	3.75596	0.00174183	0.0651275
Zfp934	0	0	2.34319	2.23426	1.02665	0	3.20354	0	-0.862896	4.10737	0.00174245	0.0651275
Adamts10	4.41502	4.28529	-0.980994	5.28446	5.13809	1.99148	3.36242	0.627628	0.559281	3.68668	0.00174302	0.0651275
Apba3	-2.00721	-1.94013	-5.7495	-2.85296	-1.35372	-3.21757	-1.87868	-5.7495	-0.078607	3.75239	0.00175445	0.0653347
Smarcad1	0.163682	0.662323	-2.84032	-1.64406	-0.0224537	-4.71179	-4.71179	-4.71179	-0.0303387	3.83902	0.00175456	0.0653347
Kcnc2	0.0982926	-1.37691	-6.79932	0.366393	2.06924	-2.85438	0.0574135	-2.05699	2.03155	3.68227	0.00175927	0.0653987
Itgb6	-0.875837	-0.875837	-0.875837	1.92644	0.150974	1.95245	0.214225	-0.875837	-0.880589	3.94867	0.0017636	0.0653996
Rft1	1.22877	-1.66552	-3.09678	-0.146117	0.783945	-3.09678	-1.46386	-3.09678	-0.541362	3.83586	0.00176529	0.0653996
Mast3	4.59084	3.13073	-0.873923	2.67389	4.81763	-0.873923	3.53688	-0.873923	0.0339968	3.83493	0.00176845	0.0654057
Epb41l5	3.00357	0	0	2.20312	0	0	0	0	-0.881271	4.64147	0.00177352	0.065482
LOC115487949	2.66426	0.683015	-1.71394	1.08223	-0.135497	-1.71394	1.34064	-1.71394	-0.62213	3.83161	0.00177982	0.0655952
Mical2	-3.84202	-1.87915	-5.40074	-1.48935	-5.40074	-5.40074	-2.71179	-0.820713	-0.177782	3.8308	0.00178259	0.0655952
Wnk4	-0.321776	-1.45576	-1.45576	2.62011	-1.45576	-1.45576	-1.45576	0.152938	-0.756778	4.09134	0.00179009	0.0656408
2210408F21Rik	-2.20147	-3.2251	-3.2251	-2.64276	-0.909411	-3.2251	-1.81414	-1.73919	-0.83371	4.85294	0.00179086	0.0656408
Itgb2	-3.92599	-0.573674	-3.92599	-0.80475	-0.49796	-3.92599	-3.92599	-3.92599	-0.619397	4.09042	0.00179286	0.0656408
Vac14	-1.07823	-1.44502	-1.04841	-2.55119	-0.287209	-0.393097	-2.90089	-3.98453	-0.55565	3.67134	0.00180018	0.0657043
Slc7a7	-4.23394	0.604795	1.22402	-0.503924	-4.23394	-1.33085	1.15775	-4.23394	-0.0115675	3.82541	0.00180122	0.0657043
Elfn1	-0.788425	1.83742	-3.88455	0.716694	2.36187	0.0102441	-0.465872	-2.25961	0.231867	3.67019	0.00180451	0.0657043
Dcp1a	-1.3919	-4.0791	-4.0791	0.17061	-0.543352	-1.16948	-0.593534	-4.0791	-0.41836	3.82386	0.00180664	0.0657043
Whrn	-2.30686	-4.7173	-1.58825	-0.655596	-0.788736	-0.784061	-1.719	-4.17362	0.160517	3.61227	0.00181394	0.0658225
Proser3	0.435763	-2.95137	1.36004	2.08881	-0.937313	-3.89244	-3.89244	0.061065	0.086067	3.73464	0.00181856	0.0658225
Det1	1.13399	0	0	1.93274	2.17956	0	3.99744	2.3788	-0.757387	3.93127	0.00182025	0.0658225
Rad51d	1.39029	0	0	4.05893	0	2.90298	0	0	-0.745877	4.29412	0.00182225	0.0658225
Tube1	-5.00005	-1.94259	-1.26243	-1.98528	-1.12826	-2.47281	-0.345208	-5.00005	-0.262429	3.73291	0.00182497	0.0658225
Cped1	-2.17862	-2.17862	-2.17862	-1.25633	-0.59831	-2.17862	1.8768	0.655409	-0.735954	3.92646	0.00183624	0.0660805
Cdon	0	0	0	2.6836	0	0	3.75428	0	-0.834908	4.61428	0.00183818	0.0660805
Lhx2	-0.765996	-4.86655	-4.86655	-0.488526	-4.86655	-4.86655	-2.36964	-4.86655	-0.336853	4.07408	0.0018429	0.0661413
Zfp808	0	0.941968	2.34434	2.76427	1.02622	2.53641	2.70081	1.4857	-0.818279	3.72571	0.00185175	0.0663499
Plcb3	-1.36806	1.96831	-1.36806	2.38358	2.38048	-1.36806	0.915244	-1.36806	-0.645824	3.91773	0.00186565	0.0667383
Rgs3	1.20353	-0.876049	-1.76557	0.634879	-0.731076	-5.93702	-3.95551	-0.0984622	1.1252	3.6525	0.00187298	0.0668909
Cd37	-0.150147	-1.07814	-4.9709	-1.01762	-2.00063	-4.9709	0.27671	-3.48692	-0.0156478	3.71811	0.00188048	0.0669725
Zfp995	-0.980557	2.01172	0.893705	1.02847	2.27203	-0.980557	0.660294	-0.980557	-0.812544	3.80138	0.00188676	0.0669725
Spi1	-2.43961	-2.43961	-2.43961	-1.85623	0.259511	-2.43961	-2.43961	-2.43961	-0.907664	5.0704	0.00188727	0.0669725
Nudt6	-3.50829	-0.498148	-2.18079	1.31507	-2.94954	-4.52945	-0.534024	-1.71597	-0.0405879	3.64882	0.00188754	0.0669725
Lin28b	-1.54757	-5.04739	-5.04739	0.696158	-5.04739	-5.04739	-5.04739	-3.35343	-0.129796	4.05862	0.00189158	0.0670069
Cep63	-2.01714	0.855462	2.89681	1.19936	2.41876	-3.15142	0.600249	-0.903176	0.0859685	3.64497	0.0019029	0.0670886
2900026A02Rik	2.35246	-1.04644	-2.71711	0.416395	0.449449	-2.05514	-1.45824	-0.405234	0.533385	3.58973	0.00190504	0.0670886
Cyb5r2	0	0	0	0.920224	3.12147	2.89908	0	0	-0.889542	4.26361	0.00190894	0.0670886
Pusl1	-4.78335	-1.10536	-0.0528391	0.0314952	-0.577325	-1.12263	-1.18579	-3.3003	-0.07811	3.64288	0.00191129	0.0670886
Gm39326	0	0	0	0	0	0	4.41209	0	-0.812889	5.13531	0.00191511	0.0670886
Nckap5l	1.72655	1.25105	2.56936	2.72753	-0.979928	-0.979928	-0.979928	-0.979928	-0.710907	3.90318	0.00191574	0.0670886
Homer3	3.65284	0.93516	0	3.40981	4.26711	0	4.09448	1.48106	-0.513279	3.79268	0.00191877	0.0670886
Siglech	-1.78469	-0.171886	-2.80869	-2.80869	-1.22552	-2.80869	-2.80869	-2.80869	-0.865111	4.04936	0.00192137	0.0670886
Ncapg2	0	0	0	4.15154	0	0	0	0	-0.788764	5.13042	0.00192513	0.0670886
Cd74	-0.979872	1.04681	-0.979872	1.70157	0.160144	3.95256	-0.979872	1.52721	-0.695575	4.06009	0.00192728	0.0670886
Il12rb1	3.35163	0	0	0	0	0	0	0	-0.90107	5.12888	0.0019283	0.0670886
Smpx	0	0	2.5003	4.52052	0	0	0	3.02582	-0.646676	4.25536	0.00193313	0.0670886
Stpg4	-0.860011	-0.196487	-5.0797	-4.15448	-3.94006	-5.0797	-5.0797	-3.45358	-0.27773	3.78674	0.00194092	0.0670886
Efna3	0.312964	0.182332	-6.12928	-1.93229	-1.44042	-6.12928	-1.74761	-2.42386	0.70339	3.70206	0.00194262	0.0670886
Cfi	0	2.68938	0	0	0	0	0	0	-0.958586	5.1203	0.00194605	0.0670886
Pax9	0	2.68938	0	0	0	0	0	0	-0.958586	5.1203	0.00194605	0.0670886
Arid5a	-2.23063	-3.25449	-3.25449	-2.33393	-2.11423	-3.25449	-3.25449	-1.6295	-0.853544	3.89454	0.00194616	0.0670886
Ephb6	-1.74672	-2.53133	-2.37458	-1.39639	-1.21285	-3.41399	-2.12985	-5.95018	0.135793	3.63115	0.00195912	0.0673387
Rela	-4.16372	-1.91961	-0.54282	-1.73884	-1.23886	0.675803	-2.50525	-3.48447	-0.0694627	3.57676	0.00195958	0.0673387
Adamts13	-2.59197	-0.143384	-2.59197	-2.59197	-1.56548	-2.59197	0.109787	-1.10593	-0.845068	3.8892	0.00196519	0.0673898
Rad52	2.45474	3.33456	-0.275713	0.821029	2.89078	2.16273	1.15497	5.74315	1.02163	3.57497	0.00196725	0.0673898
Kcnh3	-4.21981	-1.00164	-4.21981	-1.01759	-4.21981	-4.21981	-1.36815	-4.21981	-0.611011	4.0324	0.00197725	0.0676263
Dapk3	3.33422	-0.869477	-0.869477	3.61184	3.17323	-0.869477	0.21232	1.56343	-0.437084	3.7758	0.00198241	0.0676475
Ttc29	0	0	1.87626	2.56627	0	0	0	1.62487	-0.90693	4.23758	0.00198637	0.0676475
Ttc27	-2.19339	0.248023	-4.85793	-2.48045	-2.38432	-4.85793	-3.77613	-1.61995	-0.274618	3.69088	0.00198717	0.0676475
Ccdc141	2.11763	-3.5716	-1.69767	2.12889	0.92259	-3.5716	-0.711386	-0.995258	0.108924	3.68722	0.00200197	0.0680163
Fam107b	-2.86497	0.761664	-2.86497	-0.961647	0.624202	-2.86497	-1.77868	-1.1722	-0.703631	3.76965	0.00200614	0.0680163
Atp7b	-2.92456	-1.9816	-2.92456	-2.92456	-1.78427	-2.92456	-2.92456	-0.604247	-0.874174	4.02347	0.00200736	0.0680163
Taf1a	-3.15932	-3.15932	-3.15932	0.686164	0.260542	-3.15932	0.841313	1.70488	-0.370973	3.87505	0.00201658	0.0682229
Egflam	-4.29553	-1.51642	-2.42842	-1.79277	-4.29553	-4.29553	-4.29553	0.176545	-0.510553	3.87344	0.00202252	0.0683179
Rcor3	-2.95806	-1.88796	-3.71949	-0.918438	-2.54885	-7.51767	-0.628086	-0.316354	1.54766	3.61314	0.00203493	0.0685496
Zfp626	-3.1136	-1.09778	-0.554636	-0.255403	0.423644	-3.1136	-0.268495	1.98956	-0.419711	3.6785	0.0020377	0.0685496
Mroh7	-3.56341	-4.58361	-4.58361	-1.30507	-4.58361	-4.58361	-4.58361	-4.58361	-0.63935	4.22055	0.0020388	0.0685496
Ano7	3.61586	2.55176	1.87331	1.77394	0	0	1.08808	1.62522	-0.790076	3.7578	0.00205274	0.0689119
Rab27a	-0.575975	-3.12329	-3.12329	-1.21777	-3.12329	0.703936	-1.22541	-3.12329	-0.757407	3.86403	0.00205761	0.0689694
Tyk2	1.66139	-3.96622	-3.96622	-1.78743	-3.96622	-3.96622	0.249084	1.05285	-0.0801716	3.86233	0.00206399	0.0689921
Casp8	0	2.90522	0	0.919724	0	0	0	0	-0.936938	4.52658	0.00206461	0.0689921
Smpd4	-1.70792	0.368758	-2.84034	2.20287	-1.7007	-2.84034	1.02647	-2.84034	-0.426232	3.75216	0.00207527	0.0690088
Stk39	-0.424928	-0.757554	3.05951	-0.137391	0.306645	-5.95011	-1.3727	-2.47075	1.25612	3.60331	0.00207758	0.0690088
Enpp4	-2.83507	-0.798152	-3.85146	1.10644	0.635272	-3.85146	-3.85146	-1.60765	-0.333206	3.75155	0.00207774	0.0690088
E330021D16Rik	2.43416	1.25747	0.89405	0.413562	0.0456501	-0.980647	-0.980647	-0.980647	-0.821656	3.75154	0.00207776	0.0690088
Zbtb8b	-3.31846	-4.33969	-4.33969	-2.56935	-4.33969	-4.33969	-1.64437	-4.33969	-0.71588	3.99916	0.00209175	0.0692765
Gpat3	-0.150274	0.264792	0.699748	2.04399	2.12534	-1.17132	2.42891	-1.17132	-0.700944	3.66493	0.00209465	0.0692765
Acoxl	1.13466	0.942661	2.34335	2.88313	0	0	0	1.69707	-0.856527	3.85408	0.00209534	0.0692765
Lgals9	1.02281	2.5526	0	1.86972	3.15448	0	3.00119	1.48515	-0.799491	3.74506	0.00210402	0.0693851
Erich3	-0.872665	1.35717	-0.872665	2.54742	2.01077	2.71909	1.4117	1.87439	-0.676699	3.6621	0.00210672	0.0693851
Wnt5a	-3.6239	-0.749354	0.110323	-1.45439	-0.749303	0.120235	2.11937	-3.6239	-0.350761	3.66176	0.00210817	0.0693851
Cdca7	0.153867	-0.980425	-0.980425	0.955383	-0.980425	-0.980425	1.32443	2.66189	-0.798187	3.84506	0.0021302	0.0699611
Jade3	-0.876162	-0.876162	2.68288	0.360581	-0.876162	-0.876162	0.214322	-0.876162	-0.906777	5.5609	0.00213383	0.0699611
Ly86	1.78874	1.49008	2.89605	2.15669	-0.979897	-0.979897	-0.979897	0.503638	-0.702672	3.73689	0.0021376	0.0699611
Cdkn1a	-1.34201	-2.54899	-4.7699	-2.55396	-3.63019	-2.24218	-2.54637	-1.77391	-0.473022	3.58961	0.00213849	0.0699611
Pik3cd	-0.980928	-0.980928	-0.980928	1.81063	0.0460409	-0.980928	-0.980928	0.627701	-0.896994	3.98391	0.00214655	0.0700735
Kcnb2	-1.01577	-1.10289	0.0217721	-0.830109	-0.541702	-4.16019	-4.16019	-4.16019	-0.448024	3.73431	0.00214835	0.0700735
Srpx	2.71755	0	0	0	1.1403	0	2.48187	0	-0.89347	5.82994	0.00215867	0.0703051
Kcns3	3.48503	2.97718	1.86808	3.72252	4.30078	0	0	0	-0.567008	3.83658	0.0021635	0.0703573
Dop1b	-0.11862	-2.05797	-6.29135	0.179024	-0.329463	-3.31823	-3.03162	-4.68272	0.855152	3.5806	0.00217958	0.0707747
L3mbtl1	2.15313	2.99635	0	1.23667	0	0	1.0902	0	-0.889026	3.97351	0.0021848	0.0708387
4930503L19Rik	-4.20438	-2.57568	-4.20438	-4.20438	-4.20438	-4.20438	-4.20438	-4.20438	-0.766508	4.47872	0.00220068	0.0712477
Nphs1	-2.82813	-1.45973	-5.03178	-0.739601	-5.03178	-0.958072	-0.705161	-5.03178	-0.212416	3.71988	0.00220935	0.0714226
Casc1	-1.46436	-1.32202	-3.88257	-1.97509	-0.844699	-5.75503	-5.75503	-5.75503	0.0207274	3.718	0.00221742	0.0715774
Zfp41	-0.3598	-0.325926	-2.54435	2.43748	0.171142	-2.54435	1.32194	-1.06457	-0.410892	3.6315	0.00224189	0.0721623
6030458C11Rik	-0.910254	-1.81041	-4.03575	-0.507072	-2.45795	-4.03575	-1.73223	-4.03575	-0.587103	3.71228	0.00224215	0.0721623
Zfp661	-2.52727	0.202836	-3.89425	-2.51742	-2.75431	-3.89425	-2.38102	-3.89425	-0.638125	3.70858	0.00225833	0.0724948
Arhgap19	2.99632	1.68584	-0.978989	3.02649	2.71648	-0.978989	0.537801	4.60171	-0.216567	3.62773	0.00225913	0.0724948
Trim47	-1.97454	-3.33778	-3.33778	-2.38546	-0.194923	-3.33778	-3.33778	-1.71253	-0.781957	3.81105	0.00226707	0.072559
Csrp3	2.00096	-0.547121	2.17587	1.37252	1.81312	-1.97745	1.24893	3.32863	-0.21081	3.56181	0.00226778	0.072559
Tomt	0	0	0	0.584114	0	0	2.70548	0	-0.952528	4.623	0.00228385	0.0729661
Nek10	0	2.41037	0	0.920433	2.84621	2.53742	1.08986	1.4863	-0.867665	3.70195	0.0022876	0.072979
Tgfb2	-1.40973	0.0153839	-3.35134	0.573237	-1.31898	-3.35134	-3.35134	-1.09112	-0.578641	3.69946	0.0022987	0.0732261
Minar1	-2.19462	1.67962	2.10685	0.246622	0.523782	-2.19462	1.29403	4.75511	-0.185437	3.61695	0.00230925	0.0733552
Racgap1	0	2.6877	0	1.91392	0	0	1.09082	0	-0.926694	4.13943	0.00230947	0.0733552
Adam17	-0.445917	-1.53127	-3.91855	0.356593	0.483756	-1.39242	-3.91855	-3.91855	-0.394474	3.69224	0.0023312	0.0739377
Lrrc2	0.527257	-2.43648	-0.562093	-1.20912	0.385202	-2.43648	-2.43648	-2.43648	-0.815075	4.36103	0.00233744	0.0740281
Slco1a4	1.01089	1.66863	-2.79921	2.76713	0.529802	-2.79921	-2.79921	-2.79921	-0.179338	3.79263	0.00234497	0.074094
Tshb	0.608213	1.5876	-4.68869	-0.865037	-4.68869	-4.68869	-0.683287	1.85685	0.569361	3.68826	0.00234932	0.074094
Tctex1d4	1.6067	0.901333	-1.97474	1.88347	-0.953311	2.34743	2.74293	-1.97474	-0.392791	3.60842	0.00234971	0.074094
LOC118568438	0.642592	-2.733	-0.861	-2.733	0.22058	-2.733	-0.0365499	-2.733	-0.746599	3.79063	0.0023536	0.0741096
Slc2a9	0	3.48708	0	1.81413	0	0	0	0	-0.868944	4.42663	0.00235981	0.0741698
Gm33610	-2.82189	-3.95553	-3.95553	-3.95553	-0.971057	-3.95553	-1.67116	-0.735337	-0.676943	3.78822	0.00236406	0.0741698
Trdn	-2.18254	-3.20616	-3.20616	-0.833997	-3.20616	-3.20616	-1.19412	-3.20616	-0.833074	3.92677	0.00236571	0.0741698
Plch2	-2.53383	0.751165	1.33975	1.61446	-3.89803	-1.3641	0.206094	-3.89803	0.00601142	3.60136	0.00238372	0.0745052
Crygc	0	0	3.31708	0	0	0	1.40982	0	-0.93218	5.14416	0.00238553	0.0745052
Brwd3	0.0713743	1.24509	-1.86078	-0.909104	-0.835579	0.673429	1.62962	-1.86078	-0.764038	3.60076	0.00238665	0.0745052
Adra1b	-0.876072	1.92442	1.00005	1.15555	0.150923	-0.876072	-0.876072	-0.876072	-0.899719	3.77829	0.00240758	0.075051
Tiam2	-4.49434	0.689697	-4.49434	-1.15761	-3.35476	-1.58422	-1.07489	-4.49434	-0.311228	3.67254	0.00242225	0.0753323
Zbtb21	0.802263	0.351247	-5.56756	0.684398	-0.477507	1.28961	3.305	-4.07619	1.7451	3.5304	0.0024235	0.0753323
Gata3	3.54356	0	0	0	0	0	0	0	-0.885916	4.91213	0.00243677	0.0756369
Appl2	0.755603	0.555076	-0.387851	0.00145261	-0.370636	-3.05503	-3.88164	-2.96563	1.35754	3.47421	0.00245039	0.0759516
Slc6a3	0	0	0	0	1.58284	0	0	3.91584	-0.841007	4.39691	0.0024561	0.0759973
Slc11a1	2.5804	1.90285	-0.979084	0.699245	0.0435628	4.13574	1.5671	1.53106	-0.521078	3.52329	0.00246026	0.0759973
Cthrc1	1.39006	-0.671329	-2.10779	-0.40173	-0.527819	-2.10779	1.58763	-2.10779	-0.714624	3.66411	0.00246231	0.0759973
Csad	2.04729	-0.100976	-4.2144	2.75532	1.27218	-4.2144	-2.70906	-2.52446	0.706938	3.5809	0.0024852	0.0765953
Bub1	0	0	0	1.44746	0	0	3.00593	0	-0.927798	4.38555	0.00249403	0.0767592
Nsmaf	-5.77294	-2.46736	-0.863506	0.820792	-1.03857	-5.77294	-0.134059	-1.50831	0.618058	3.57721	0.00250396	0.0769561
Igfbp2	-4.20756	-1.43533	-0.524039	-1.30519	-1.13652	-1.32797	-1.07293	-5.22857	-0.0499543	3.51371	0.00251063	0.0769699
Trnp1	1.03933	-1.24378	-0.112625	-2.67943	0.384341	-2.67943	-3.88329e-05	-1.0707	-0.68045	3.57506	0.00251494	0.0769699
Kcnn1	1.23223	-2.3788	-2.3788	3.148	2.6163	0.605686	-0.136445	-0.0143235	-0.145064	3.57506	0.00251499	0.0769699
Kcnn2	2.0096	2.55752	0	2.2874	0	0	1.09014	0	-0.885681	3.88841	0.00252583	0.0771935
Elf2	1.03596	0.376534	0.00663523	0.111052	2.45807	-3.9614	0.639357	-2.35277	0.248488	3.50752	0.00254374	0.0775745
LOC118567607	1.70226	-1.04463	-1.98518	-0.0520788	-0.845037	0.549606	-1.98518	-1.98518	-0.781488	3.64707	0.00254541	0.0775745
Has3	3.49168	0	0	0	0	0	0	0	-0.887427	4.86579	0.0025637	0.0780229
Slx4	-2.74522	-2.94455	-2.01276	0.256885	-3.8775	-3.8775	-1.98142	1.02774	-0.38927	3.56422	0.0025712	0.0781424
Mxra7	0	2.40478	0	1.67061	2.31377	3.5302	2.91135	1.60869	-0.779569	3.88807	0.00258024	0.0783079
Lig3	-0.942141	-1.66778	2.58206	-1.3576	-1.57759	-2.09081	-1.46059	-5.74924	0.636615	3.49869	0.00259175	0.0784978
Lypd6b	-0.965451	0.0698024	-4.68476	1.72664	0.517689	-2.14624	-4.68476	-2.35851	0.328023	3.55995	0.00259369	0.0784978
Dock6	0.655261	-0.678224	-3.88782	-3.88782	-3.88782	-3.88782	0.47611	-3.88782	-0.437011	3.87046	0.00260466	0.0786578
Myh7b	-1.89358	-3.02841	-3.02841	-2.44518	-1.88811	-3.02841	-3.02841	-3.02841	-0.897725	3.87011	0.00260619	0.0786578
Stambpl1	-2.43959	1.53111	-3.4607	0.808755	0.218217	1.40745	1.92061	-3.4607	-0.0431982	3.55671	0.00261089	0.0786738
Pilrb2	-0.438377	-0.74373	-3.3558	-3.3558	-1.37186	-0.824207	0.458843	-3.3558	-0.645229	3.63283	0.00261711	0.0786738
Tepp	1.96486	2.22931	2.49931	2.24515	2.88309	0	4.34387	0	-0.659488	3.63274	0.00261753	0.0786738
Tcf3	0.917033	1.23896	-1.61408	-0.646366	0.513958	-3.47808	-2.39757	-3.47808	-0.340031	3.55447	0.00262287	0.0787257
Pcsk4	-0.848332	0.354511	-4.10758	-2.89331	1.14502	-4.10758	-2.4776	-4.10758	-0.295136	3.62832	0.00264023	0.0790961
Lrp4	0.0294635	-3.14108	-3.14108	0.915962	0.0417569	-3.14108	-1.62644	-3.14108	-0.592514	3.7277	0.00264246	0.0790961
Lsp1	-1.14494	-0.46225	-2.74337	-4.60756	-0.339907	-1.6156	-4.60756	-1.85011	-0.331704	3.54933	0.00265051	0.0792286
Adcy7	1.79999	1.49198	-1.98172	-1.98172	0.265909	-1.98172	1.61656	-1.98172	-0.655498	3.72514	0.00265498	0.0792534
Enox2	-0.980294	-0.980294	-0.980294	1.87025	2.64707	-0.980294	1.71786	0.50443	-0.781157	3.72335	0.00266373	0.0793128
Rragd	2.66444	-0.345495	-0.0888146	1.10089	1.84592	-1.13044	0.943074	-0.584471	0.675131	3.43586	0.00266448	0.0793128
Armt1	-1.98546	-0.111083	-5.78422	-0.431137	-0.881261	-5.78422	-0.745082	-1.44004	0.469656	3.54566	0.00267046	0.0793128
Gm46162	0.317052	-2.60783	-2.60783	-1.37226	-2.60783	-2.60783	1.59184	-0.914968	-0.693741	3.72177	0.0026715	0.0793128
Gm40841	-2.01204	-2.56778	-2.34202	-0.794317	-2.5363	-5.60235	-1.98277	-0.956478	1.9055	3.43251	0.00268404	0.0794836
Cntln	2.96693	-1.71479	-1.71479	-1.71479	0.0597497	1.58268	-1.71479	-1.71479	-0.648337	3.85212	0.0026878	0.0794836
Stk19	-0.271843	-1.54204	-3.98802	-2.38885	-0.39629	-3.98802	-2.35591	-0.730846	-0.498579	3.54198	0.00269062	0.0794836
Fblim1	0	2.68828	0	0	0	0	1.50445	0	-0.938086	4.32915	0.00269183	0.0794836
Apbb1ip	2.69006	0.761187	-0.872535	1.95855	0.70679	-0.872535	3.04779	-0.872535	-0.661683	3.61717	0.00269828	0.0795417
Zfp839	-1.28463	-2.92004	-4.93459	-2.3371	-2.69392	-0.0807243	-2.66039	-4.93459	-0.337424	3.54008	0.00270109	0.0795417
Zbtb25	-2.33515	2.03466	-3.3518	-0.519004	0.854572	-0.360912	-3.3518	-0.918461	-0.318741	3.53843	0.00271018	0.0795417
Zzef1	1.28993	-0.14173	-3.20898	1.83682	0.220096	-3.20898	1.99473	-1.72621	-0.0957597	3.53667	0.00271997	0.0795417
Ablim1	-1.31008	-3.44187	-1.42348	-0.118973	-2.01522	-6.93106	-2.57184	-3.96008	0.98564	3.47583	0.00272042	0.0795417
Ppp1r3f	1.54839	2.02854	0	1.77145	0	4.53104	2.28631	1.69231	-0.744326	3.61231	0.00272403	0.0795417
Pml	-2.11411	-3.13612	-3.13612	-3.13612	-0.0199915	-3.13612	0.385091	-3.13612	-0.765351	3.84418	0.00272464	0.0795417
Slc14a2	-3.13976	-3.13976	-1.26369	-3.13976	-3.13976	-3.13976	-3.13976	-3.13976	-0.897423	4.32012	0.00272504	0.0795417
Slco1a5	-0.0792444	0.759762	0.229548	1.98728	-1.64202	0.89124	-1.64202	0.605283	-0.727189	3.53547	0.0027266	0.0795417
Ripor3	-1.16918	1.38299	-1.16918	1.55833	2.43723	-1.16918	-0.0809559	-1.16918	-0.794787	3.70685	0.00274606	0.079924
Cd36	0.130118	-3.2273	1.27417	2.2001	0.966476	-3.2273	-3.2273	-1.6185	-0.218925	3.608	0.00274703	0.079924
Sh3tc2	2.70674	1.77363	0	1.77068	2.10783	3.29962	3.91861	0	-0.725338	3.60635	0.00275589	0.0799698
Rasa4	1.83908	-0.873158	-0.873158	2.85259	0.886033	1.66001	-0.873158	0.735559	-0.722909	3.6053	0.00276157	0.0799698
Cmklr1	3.3727	0	0	1.09123	1.02675	0	0	0	-0.874111	4.02336	0.0027648	0.0799698
Oca2	0.966381	-0.463557	2.46113	0.122088	-1.89975	-1.89975	-0.813454	0.420329	-0.704186	3.52767	0.00277044	0.0799698
Cntnap5b	0.19347	2.02447	-1.37308	0.763681	-1.37308	-1.37308	-1.37308	-1.37308	-0.854021	3.83309	0.002777	0.0799698
Dclre1a	0.259045	-0.875646	-0.875646	0.767048	2.56296	-0.875646	0.214168	-0.875646	-0.864268	3.69998	0.00278112	0.0799698
Mlh1	1.02657	-2.38954	-2.29168	0.108167	0.866521	-4.16326	0.248231	-2.55454	-0.0257373	3.46482	0.00278466	0.0799698
Mir670hg	-0.95836	0.620821	-5.40525	0.403764	-3.36644	-5.40525	-1.39956	-3.78041	0.352751	3.52516	0.00278469	0.0799698
Celsr1	1.36353	1.72075	0	2.2866	3.94517	0	1.08764	0	-0.774358	3.69922	0.00278503	0.0799698
Synrg	-0.0181281	-1.35629	-5.77427	0.339857	0.464124	-3.23622	-0.182495	-5.77427	0.772422	3.52506	0.00278526	0.0799698
Npy	-3.23609	-2.66955	-2.51009	-2.67346	-2.00562	-5.44625	-1.89511	-5.44625	-0.254662	3.52358	0.00279367	0.0801059
Myh3	0	1.64837	0	0	6.47253	0	0	0	-0.556661	4.2988	0.00280518	0.0802675
Zfp235	1.36427	3.10233	0	2.52519	3.79917	0	0	0	-0.751699	3.82691	0.00280666	0.0802675
Emcn	-3.56576	-3.56576	-3.56576	-1.7891	-3.56576	-3.56576	-2.47647	-2.07991	-0.827778	3.82304	0.00282534	0.0804697
Zc3hav1	2.5093	-1.369	1.93074	-0.146476	0.877587	-1.369	1.07111	-1.369	-0.696246	3.59345	0.00282624	0.0804697
Skiv2l	-0.984998	-2.83436	-4.59731	-2.70495	-1.58066	-1.68771	-2.59881	-0.750975	-0.418579	3.4564	0.00283482	0.0804697
Zfp109	-3.31239	0.614603	-3.31239	-1.29158	0.0748373	-3.31239	-2.22652	-3.31239	-0.670008	3.68932	0.00283642	0.0804697
Ifi203	0	0	0	0	0	0	0	4.5122	-0.775699	4.77393	0.00283732	0.0804697
Incenp	0	0	0	2.69144	0	0	2.70265	1.62495	-0.873504	4.00651	0.00283839	0.0804697
Celf5	0.33949	-0.923376	-3.95499	-1.85983	-0.865588	-2.93297	-5.83149	-4.13514	0.397881	3.45561	0.00283954	0.0804697
Cep162	-0.451684	-2.38035	0.184858	1.39245	-2.38035	0.150859	-2.38035	1.37905	-0.633055	3.58905	0.00285065	0.0806797
Dctd	0.702184	1.60224	-1.17536	0.636094	2.36235	-1.17536	3.38668	3.0242	-0.479109	3.5089	0.00287881	0.0813711
Nr6a1	-0.663584	-2.43113	-3.37238	-3.37238	-3.37238	-0.543123	-3.37238	-3.37238	-0.801468	3.8103	0.00288792	0.0814526
Krba1	-0.409612	-0.576519	1.2925	-0.0700074	1.0001	-4.87767	-3.78697	-4.87767	0.35477	3.50682	0.00289106	0.0814526
Cdh5	3.04762	2.54136	3.30709	0.95041	3.06465	0	0	2.73149	-0.717669	3.581	0.00289587	0.0814526
Acta1	2.40258	-1.16564	-0.196255	-0.236968	3.98142	0.5786	0.183846	0.720245	0.470199	3.39757	0.00289716	0.0814526
Gxylt1	-3.58711	-3.58711	-0.85878	0.678343	-0.378066	-3.58711	-1.58517	-2.1057	-0.546993	3.58021	0.00290036	0.0814526
Zbtb34	-1.19225	-1.19225	-1.19225	1.88704	1.82034	1.3429	-1.19225	0.292699	-0.791204	3.67398	0.00291801	0.0815936
Cdh7	-5.01568	-0.2641	-3.14151	-0.509863	0.110974	-2.47866	0.859407	-3.52962	0.190718	3.4422	0.00292155	0.0815936
Serpinb9	3.3636	4.39442	0	2.39536	2.67303	0	0	0	-0.658222	3.80167	0.00293113	0.0815936
Bves	3.67639	0	4.0596	0.947926	1.79375	0	0	3.78347	-0.617686	3.67017	0.00293866	0.0815936
Tmem54	3.71799	2.67705	2.3475	1.47101	0	0	2.69667	0	-0.751607	3.66971	0.00294114	0.0815936
1700030J22Rik	0	2.24123	0	2.90912	0	0	0	0	-0.903359	4.26393	0.0029418	0.0815936
Ints6l	-1.94416	-2.06935	-3.50899	-2.13476	-1.39988	-3.50899	-3.50899	-2.0239	-0.796934	3.57271	0.00294324	0.0815936
Mak	-2.38306	1.03132	-2.38306	-0.986137	-2.38306	-2.38306	-2.38306	1.44255	-0.725515	3.79916	0.00294384	0.0815936
Myom2	2.66493	-0.874404	-0.874404	1.41286	-0.874404	-0.874404	1.98498	-0.874404	-0.794045	3.79884	0.00294543	0.0815936
Trim7	-1.17212	1.81009	-1.17212	2.24382	2.89779	1.35965	0.725256	0.310821	-0.650802	3.49759	0.00294619	0.0815936
Gabpb2	1.19853	2.08822	-1.19739	3.16574	-1.19739	1.70906	0.436556	0.428401	-0.585685	3.49754	0.00294651	0.0815936
Cdc25b	-0.980747	-0.980747	-0.980747	2.02391	-0.980747	-0.980747	-0.980747	1.52282	-0.85002	3.97906	0.00296279	0.081841
Gm35438	-0.629109	-3.53747	-0.780189	-2.96083	-3.53747	-3.53747	1.85531	-3.53747	-0.520139	3.66572	0.00296294	0.081841
Reep6	-1.34885	-2.71462	-0.843796	-0.107032	0.987764	-2.71462	0.582028	-2.71462	-0.686035	3.5627	0.00300144	0.0827994
Casz1	-2.28165	-1.28009	-3.82932	-3.82932	-3.82932	-3.82932	-3.82932	-2.22061	-0.754259	3.78435	0.00301993	0.0832041
Atxn7	1.21936	-0.621933	-4.48695	-1.11665	0.813816	-4.48695	-0.531618	-4.48695	0.0632021	3.55826	0.00302765	0.0832041
Slc26a4	0.516005	-3.89009	-3.89009	-3.89009	-3.89009	-3.89009	-3.89009	-2.40752	-0.630393	3.96404	0.00303326	0.0832041
Car7	-3.24273	-3.24273	-0.173069	1.43281	-0.11739	-3.24273	-1.24136	-3.24273	-0.522893	3.65252	0.00303621	0.0832041
Klhl32	-2.82749	-2.90952	-2.7382	-2.02922	-2.63087	-5.29603	-2.16891	-3.81665	-0.371887	3.42327	0.00304132	0.0832041
Pnpla7	-0.0683591	-2.80775	-0.749773	-0.854761	-0.269267	-6.99265	-1.38747	-6.99265	1.32977	3.48107	0.00304751	0.0832041
1700094D03Rik	3.36052	4.1102	3.30017	3.77537	1.13963	0	3.91611	2.72938	-0.421066	3.47955	0.00305705	0.0832041
Wnt6	0	2.68723	0	0.583532	1.67285	0	1.09066	1.48691	-0.917302	4.52165	0.00306333	0.0832041
Zfp458	3.66432	1.70032	0.678747	2.92964	-1.19346	-1.19346	4.06147	4.19491	0.00657147	3.47827	0.00306506	0.0832041
Dmpk	-2.38053	1.24845	1.5336	2.29341	2.51406	0.524646	2.85019	-0.897838	-0.100338	3.41936	0.00306668	0.0832041
Gm33856	0	0	0	2.38124	1.14028	0	3.00367	1.62497	-0.865378	3.77489	0.00306957	0.0832041
Zbtb41	-1.72575	-0.783515	-1.72575	1.34689	0.770858	-1.72575	-1.72575	-0.239871	-0.829924	3.64627	0.0030716	0.0832041
Atf6	3.24971	0.498587	-1.45378	1.16646	2.10155	-0.431618	0.573981	2.16966	0.503815	3.37062	0.00307325	0.0832041
Poc1b	1.93196	2.00559	0	2.85907	0	2.53404	0	3.30018	-0.758493	3.64574	0.00307462	0.0832041
Clic3	0	0	3.31599	0.583328	1.96502	0	0	1.60863	-0.904056	4.88433	0.00308172	0.0832041
Pth1r	0.680366	-1.17059	0.701297	2.07548	2.67416	-1.17059	-1.17059	-1.17059	-0.742008	3.64429	0.00308289	0.0832041
Rnf213	-3.50904	-3.50904	-3.50904	-1.42998	-3.50904	-3.50904	-3.50904	-3.50904	-0.849596	4.22795	0.00309028	0.0832041
Xlr4b	3.16152	2.88542	0	4.37923	3.22596	0	0	0	-0.597467	3.77051	0.00309286	0.0832041
Palld	1.30436	-1.47639	-5.07259	-0.447803	-0.682584	-2.53428	-1.82887	1.41575	0.620016	3.41535	0.00309295	0.0832041
Catip	4.26561	0	0	3.38439	0	0	2.00345	3.47704	-0.600039	3.77016	0.00309474	0.0832041
Gm14322	-1.82577	-0.292676	-2.84997	-2.84997	-2.84997	-2.84997	-1.75991	-2.84997	-0.880669	3.76976	0.00309684	0.0832041
Cdc45	1.65356	0	2.34486	2.92017	2.67804	0	0	1.69108	-0.810139	3.6413	0.00309999	0.0832041
Mau2	1.36378	3.51915	0	1.07124	0	0	0	3.41448	-0.767152	3.7683	0.00310465	0.0832267
Nupr1l	1.56663	0	0	0.582673	0	0	0	3.65221	-0.858468	4.193	0.00311799	0.0834819
Dlg5	-0.196111	-5.35655	-0.340768	-0.746583	2.41958	-2.81841	-0.612267	-1.10926	0.718652	3.41058	0.0031244	0.0835051
Ehhadh	0.15384	0.457023	2.32773	1.00999	2.08513	3.08753	0.657803	-0.980031	-0.735295	3.88642	0.00312651	0.0835051
Lig4	-1.86271	0.546635	-1.86271	0.953081	0.67745	-1.86271	-1.86271	-1.86271	-0.841311	3.75848	0.00315772	0.0841429
Gm18152	0	0	0	2.90137	1.96482	0	0	0	-0.893755	4.21213	0.00315811	0.0841429
P2ry1	-0.08978	0.718471	-1.28667	1.25339	-0.783026	-3.15254	-0.410634	-3.15254	-0.451269	3.46277	0.00316392	0.084195
Zfp938	1.38597	3.10921	0	1.37314	1.02653	2.53706	1.08959	0	-0.84897	3.53452	0.00317182	0.0842442
Nedd9	-0.57165	-0.0437816	-0.404266	-2.17828	-2.37662	-3.40126	-3.40126	-3.40126	-0.71429	3.53302	0.00318116	0.0842442
Tnni1	4.72735	3.57056	2.50928	4.2659	4.68636	0	3.66669	0	-0.241594	3.53296	0.00318153	0.0842442
Lrguk	3.37481	2.23136	0	3.3733	1.67031	0	2.00715	1.60872	-0.720606	3.53277	0.00318271	0.0842442
Cep104	-1.62003	0.415217	-1.62003	1.31034	-0.593366	-1.62003	-0.530217	-1.62003	-0.863922	3.62619	0.00318809	0.0842442
Kctd9	-0.822898	-0.974367	-5.48522	-2.55398	-2.53248	-5.48522	-1.14598	-4.00165	-0.0438195	3.45853	0.00319153	0.0842442
Sfmbt2	-2.54803	0.866012	-2.54803	0.231236	-2.54803	-2.54803	-2.54803	1.80543	-0.629909	3.75202	0.00319317	0.0842442
Art3	-2.37888	-4.02762	-2.1601	-0.460764	-4.02762	-4.02762	0.211602	-2.41884	-0.536685	3.53054	0.00319665	0.0842442
Zfp142	2.91837	-0.869732	-0.869732	2.84298	2.7474	-0.869732	1.02665	3.60183	-0.457501	3.52701	0.00321889	0.0847278
Arsg	-2.88572	-1.34449	-4.01948	-1.57172	-2.87945	-4.01948	-2.0126	-4.01948	-0.710589	3.52585	0.00322622	0.0848184
Stk36	1.38428	2.68707	0	0	1.02714	0	1.64343	0	-0.913937	3.74369	0.00323949	0.0850648
Xntrpc	-0.874158	1.15654	-0.874158	0.746453	0.885464	3.45127	2.1252	-0.874158	-0.783342	3.52222	0.00324927	0.085219
Pou6f1	-0.746934	0.444439	-2.69029	2.28173	1.1602	-2.69029	-0.44484	-1.21052	-0.409632	3.44247	0.00329838	0.0864033
Nfkbid	0	0	0	0	0	0	0	4.38588	-0.794751	4.63101	0.00332922	0.0870166
Dph7	-3.08806	-5.05597	-1.75834	-2.84032	-2.58164	-5.05597	-2.20929	-2.69143	-0.466157	3.43735	0.00333327	0.0870166
Slc6a5	0.258932	2.0265	-0.87582	1.74609	-0.87582	-0.87582	-0.87582	-0.87582	-0.879158	3.72625	0.00333868	0.0870166
Layn	1.84941	2.41243	0	0	0	0	1.89883	0	-0.915333	4.31411	0.00333944	0.0870166
Zfp719	0.472655	0.554003	-2.19744	0.0248407	2.33195	-2.19744	0.308284	-2.19744	-0.628651	3.50779	0.00334259	0.0870166
Tfap4	4.2355	3.71377	4.59297	2.21617	3.53926	0	1.63155	1.6088	-0.478232	3.43529	0.00334733	0.0870166
Rps6kb2	-2.00772	-3.65648	-1.78894	0.670265	-2.6337	-3.65648	-2.5731	-0.204373	-0.537366	3.43493	0.00334981	0.0870166
Gprin2	-1.81864	-0.342194	-2.95097	1.83837	1.25042	-2.95097	0.196932	-1.24766	-0.402412	3.43437	0.00335369	0.0870166
Maml3	1.13472	2.87956	0	0.95531	2.67997	0	1.64244	0	-0.872239	3.7094	0.00335884	0.0870466
Gpr137b	2.42555	0.807695	1.05186	-0.488874	1.46934	2.14912	-1.16676	-0.622128	-0.419306	3.3287	0.0033688	0.0872012
Pank1	1.39058	0	1.87177	2.39691	3.43231	2.97933	3.14215	0	-0.736806	3.50207	0.00338034	0.0873256
Lyst	-0.71341	-1.25261	-3.72194	2.0021	0.733563	-0.742768	0.0438214	-1.40302	-0.0517964	3.37337	0.00338161	0.0873256
Nod2	-3.1394	-3.1394	-3.1394	-2.55644	-3.1394	-3.1394	-0.847231	-3.1394	-0.879196	3.89345	0.00338908	0.0874152
Gper1	-3.04669	0.949965	-3.04669	-0.494121	-3.04669	-3.04669	-1.04086	-0.0807897	-0.662432	3.59085	0.00340438	0.0875956
Flnb	-2.19152	-1.43708	-3.21427	-0.267028	-1.25177	-3.21427	-3.21427	-3.21427	-0.797631	3.59047	0.00340679	0.0875956
Gp1bb	-0.0473827	-1.12233	-4.3898	0.23925	-0.431311	-1.85988	-0.13147	-4.3898	-0.149617	3.42606	0.00341138	0.0875956
Mbd6	-4.2004	-0.361659	-4.2004	-0.764908	-4.2004	-4.2004	-4.2004	0.798063	-0.346256	3.71369	0.00341214	0.0875956
St6gal2	-4.55306	-1.88941	-2.68675	-1.14731	-1.27554	-4.55306	-0.815144	-4.55306	-0.472288	3.49659	0.00341698	0.0876168
Fryl	0.212251	-1.76406	-7.20061	-0.15581	1.36943	-3.4206	-1.10168	-4.29405	1.90965	3.36676	0.00342956	0.0876684
Kcnk10	1.13424	0.940894	0	2.28569	3.23346	2.53518	2.99992	0	-0.791914	3.49469	0.00342971	0.0876684
Klc3	-1.91925	-2.93781	-0.584204	1.17555	1.25716	-0.0302919	-0.953497	-2.93781	-0.527651	3.42326	0.00343104	0.0876684
Zdhhc18	-1.37714	1.18777	-2.3994	-0.56489	-0.818233	0.135232	-1.31169	-2.3994	-0.777151	3.4213	0.00344484	0.0879179
Gm11419	3.89911	4.29423	1.86719	4.06576	0	0	0	0	-0.516142	3.70707	0.00345147	0.0879841
Uncx	1.02353	2.40872	0	0	2.2324	0	0	3.35533	-0.824704	3.70432	0.00346796	0.088147
Polk	-2.03457	-1.13521	0.831707	-1.87103	-3.63013	-4.65198	-2.1525	-2.32586	-0.271958	3.36053	0.00347531	0.088147
Glt8d2	0	2.80112	0	1.77958	1.96519	0	0	0	-0.912628	3.87652	0.00348081	0.088147
Npvf	-1.71278	-0.280523	-1.71278	1.17957	2.75097	0.81705	2.38392	-0.0114983	-0.578681	3.41606	0.00348211	0.088147
Trappc6a	1.08423	-0.864332	-0.381246	0.285213	-0.453769	-5.92417	-0.535675	-1.72968	1.0522	3.3592	0.00348516	0.088147
Safb2	-2.21546	-1.04334	-3.41299	-0.972825	-1.11425	-1.10018	-4.48595	-7.34661	1.24556	3.35876	0.00348841	0.088147
Mitf	1.82514	-2.10429	1.48353	-2.10429	1.88815	1.65971	0.131026	-2.10429	-0.544992	3.4859	0.00348947	0.088147
Larp4b	0.97198	-1.07298	-0.796687	0.743317	-0.814045	-4.33984	-0.470919	-2.36265	1.8407	3.31215	0.00349334	0.088147
Palmd	-2.57905	-2.88292	-4.31833	-1.77453	-2.73894	-4.31833	-2.80607	-2.83513	-0.668346	3.41425	0.00349509	0.088147
Plekha2	1.26609	0.238063	-3.33692	-2.41288	-3.33692	-3.33692	-3.33692	-1.72815	-0.566758	3.57597	0.00349996	0.088147
Trim12c	-3.30674	-2.36448	-3.30674	-1.68301	-1.12593	-3.30674	-1.29473	-3.30674	-0.831855	3.57535	0.00350395	0.088147
Myo1e	1.56924	-0.660349	-2.88096	-0.0296609	0.998937	0.410741	0.109875	-2.88096	-0.466293	3.41225	0.0035095	0.088147
Pdlim5	1.16476	-0.828592	-2.02367	1.14966	-0.745633	-1.36216	-3.89196	-2.41018	-0.153616	3.35579	0.00351056	0.088147
Samhd1	-2.38831	-0.946417	-2.38831	-0.251722	0.873711	-2.38831	-2.38831	-2.38831	-0.849417	3.69628	0.0035167	0.088147
Spata1	1.06111	1.68216	-0.876106	-0.876106	-0.876106	-0.876106	1.13776	-0.876106	-0.902421	3.69599	0.00351845	0.088147
Cldnd2	0	2.41506	0	0	0	0	0	0	-0.968799	4.58009	0.00352662	0.0882504
Tent2	0.852012	-2.20014	-2.20014	-0.177603	1.915	-2.20014	-0.787144	-2.20014	-0.723342	3.57099	0.0035325	0.0882625
Lpl	-2.0979	-1.27913	-1.18209	-1.79638	-3.74907	-3.74907	-2.23716	-1.31831	-0.688334	3.4087	0.00353519	0.0882625
Susd3	-1.62074	2.36909	2.12827	0.0385802	-1.62074	-1.62074	0.386624	-1.62074	-0.727891	3.56927	0.00354384	0.0883773
Cyp26b1	-3.17457	-4.30802	-4.30802	-1.51832	-0.790336	-4.30802	-3.22276	-4.30802	-0.64058	3.56729	0.00355695	0.0885944
Cdh4	-0.491319	-5.65622	-5.65622	-1.38075	-1.16874	-5.65622	-2.52625	-3.08108	0.0410838	3.4751	0.00356438	0.0885944
Fam189a1	0.635741	0.0676629	0.502056	1.74891	2.12099	-1.37039	-0.28302	-1.37039	-0.763578	3.40465	0.00356473	0.0885944
Xndc1	-1.93682	-1.93682	-1.93682	0.244993	0.557505	2.78906	0.758709	-1.93682	-0.722075	3.56443	0.00357596	0.0887725
Il1r1	-3.28665	0.644161	-3.28665	-0.970462	-3.28665	-3.28665	-3.28665	-3.28665	-0.742976	3.85753	0.00358677	0.0889398
Rbm41	1.02166	2.85193	0	2.56053	2.84119	0	3.52023	0	-0.745719	3.56136	0.00359647	0.089079
Pkd1l3	-3.31494	-5.16779	-2.65834	-0.923081	-2.06136	-5.16779	-0.843879	-3.54174	-0.244879	3.39707	0.00362066	0.0894306
Il17ra	-2.90822	-0.500163	-2.90822	-0.855642	-2.90822	-0.371921	-1.49698	-2.90822	-0.816252	3.55747	0.00362262	0.0894306
Pds5a	-0.46345	-0.784657	-3.11258	-1.0429	-0.922104	-1.16355	1.34095	-3.50184	0.229407	3.29554	0.00362296	0.0894306
Cnksr2	0.127938	-0.421388	-1.0946	-1.9317	-1.80994	-0.843588	1.43628	-3.96156	0.653863	3.29344	0.00363963	0.0897405
Helq	0	0	0	2.03195	0	0	0	2.81383	-0.908013	4.10756	0.00364858	0.0897868
Igsf10	-3.00122	-4.37301	-2.50742	-2.66773	-2.41824	-4.37301	0.277805	-0.932322	-0.437517	3.39318	0.00364974	0.0897868
Adra1a	-2.41459	-1.83943	-1.90708	-1.18175	-4.41178	-6.11081	-6.11081	-1.12195	0.257793	3.38992	0.00367422	0.0902413
Lrrc36	-1.16928	-1.16928	-1.16928	0.73834	1.67391	1.66016	2.35361	-1.16928	-0.791949	3.54913	0.00367936	0.0902413
Cpne3	0.589467	-1.32327	-0.192245	1.68469	0.124799	-2.75286	0.686388	-2.75286	-0.477044	3.38897	0.00368143	0.0902413
Adamts18	5.00366	-1.17462	-1.17462	-1.17462	-1.17462	-1.17462	-1.17462	-1.17462	-0.523459	4.10045	0.00368476	0.0902413
Gm34110	0	0.94337	0	2.38192	0	0	0	2.44302	-0.897209	3.83676	0.00370666	0.090676
Prkab2	2.82914	3.8111	0	3.12072	2.17893	0	1.08619	1.6255	-0.696576	3.45038	0.00374209	0.0910951
Plk3	1.74081	0	2.57131	3.56073	1.14019	0	0	0	-0.804173	3.66026	0.0037438	0.0910951
Gm29797	3.90114	0.935932	0	1.8021	2.66983	0	2.68964	4.41321	-0.562196	3.45009	0.00374422	0.0910951
Cacna1h	-2.10334	-0.755992	-5.57193	-1.52517	-1.37601	-5.57193	-0.392575	-5.57193	0.0896924	3.44976	0.0037466	0.0910951
Gm13269	0	0	0	0.956618	0	0	2.70454	1.60862	-0.928017	3.82783	0.00375947	0.0910951
Arl11	0	2.41422	0	0	0	0	1.40954	0	-0.952565	4.08494	0.00376506	0.0910951
Zfp629	-0.398442	0.860011	-0.189665	1.52929	0.358455	3.73674	-0.0450762	-0.936253	-0.257918	3.27793	0.00376566	0.0910951
Loxl2	-0.438918	-1.44277	-2.37996	1.80785	-0.710702	-2.37996	-2.37996	1.03131	-0.622803	3.44666	0.00376959	0.0910951
Ldlr	0.0150254	-1.41377	-1.31601	-1.0631	-2.16289	-0.654307	-3.18771	-3.18771	-0.733869	3.37699	0.00377325	0.0910951
Ska1	-0.875393	1.53396	0.999645	-0.875393	0.26486	-0.875393	0.766388	2.3626	-0.841744	3.54119	0.00378076	0.0910951
Mapk7	0.176087	-5.85366	-5.85366	0.670679	-0.270503	-5.85366	-0.549716	0.974617	1.04771	3.44505	0.00378157	0.0910951
Klhl18	0.134145	-1.19766	-4.07458	0.741703	-1.70569	-4.07458	-0.567074	-4.07458	-0.293308	3.44494	0.00378239	0.0910951
Mtus2	0.993903	-1.36645	0.259608	1.92241	1.80252	-2.30081	1.02713	-0.820297	-0.471047	3.32026	0.0037865	0.0910951
Etv2	2.1535	0	0	0	2.68118	0	1.09067	0	-0.91782	3.82298	0.00378849	0.0910951
Gm43380	0	0	0	0	0	0	2.70563	0	-0.956126	4.51614	0.00379292	0.0910951
Tti1	-1.06326	-0.859185	-4.37671	-0.796597	-3.23704	-1.84939	-1.53042	-4.37671	-0.455575	3.37385	0.00379767	0.0910951
Dcbld1	1.33697	2.60415	-0.873364	2.37742	-0.873364	-0.873364	1.9831	-0.873364	-0.738264	3.53214	0.00379781	0.0910951
Taf4	-2.59015	-2.59015	0.716728	0.533311	1.01225	-2.59015	-1.07872	-2.59015	-0.711462	3.53198	0.00379894	0.0910951
Rrm2b	-3.27271	-0.612903	-3.27271	-0.291178	0.48998	-3.27271	0.705427	1.59831	-0.382247	3.44119	0.00381041	0.0911862
Cyb561d1	-2.11963	-3.25215	-3.25215	1.26853	0.17006	0.819605	-0.408581	-0.926029	-0.449826	3.37108	0.00381937	0.0911862
Mybl1	-3.10604	-3.10604	-3.10604	-3.10604	-3.10604	-3.10604	-3.10604	-3.10604	-0.912349	4.50955	0.00382158	0.0911862
Eps8l1	-2.85995	-0.899703	0.425643	1.84378	0.170134	-3.8798	-0.546341	-3.8798	-0.118071	3.37055	0.00382356	0.0911862
Bik	-4.1492	-3.21491	-0.0958805	-0.202021	-0.615153	-4.1492	-1.2414	-4.1492	-0.467218	3.43943	0.00382363	0.0911862
Car4	-0.158108	-0.773477	-0.536121	0.863197	-0.332973	-4.425	-1.191	-4.425	-0.0455211	3.36798	0.0038438	0.0915322
Mutyh	1.08876	-0.874172	1.47207	0.0474621	1.87247	-0.874172	2.72939	-0.874172	-0.783955	3.43616	0.00384837	0.0915322
Gm8300	-1.25091	-1.93527	-1.8523	-2.73586	-1.61738	-1.3727	-2.20143	-4.20447	-0.587096	3.60611	0.00385104	0.0915322
Tpx2	-2.68007	1.0894	-2.68007	0.831939	-1.54004	-2.68007	-2.68007	-2.68007	-0.706652	3.64345	0.00385492	0.0915322
Adamts15	-2.85048	-2.85048	-2.85048	-0.317907	-2.85048	-2.85048	-2.85048	-2.85048	-0.876984	4.06676	0.00386161	0.0915914
Gm31946	-1.9974	-0.739211	4.18052	-1.20415	-1.99036	-3.13008	-0.584351	-0.989035	-0.481064	3.30962	0.00387335	0.0916754
Slc41a2	-2.59269	-0.557108	-0.71708	-0.186475	-2.59269	-2.59269	-2.59269	-2.59269	-0.873369	3.64069	0.00387355	0.0916754
Cpm	-0.974957	0.16581	-2.10902	1.33252	-2.10902	-2.10902	-2.10902	0.0375951	-0.768436	3.85307	0.00388217	0.0917605
Metap1d	-0.296764	-3.94687	-3.94687	1.08836	0.618256	-3.94687	0.0953197	-3.94687	-0.202739	3.5199	0.00388555	0.0917605
Brpf1	1.46035	0.640552	-1.67468	-0.164689	1.36838	-1.01323	-3.54188	-3.54188	-0.197241	3.36167	0.00389408	0.0918155
Dnah7b	1.84572	0	0	3.1181	0	0	1.5031	2.35961	-0.820339	3.63716	0.00389742	0.0918155
Pdia5	-2.15763	-0.505512	-3.17809	-0.902458	1.17855	-3.17809	-0.484707	-3.17809	-0.652047	3.4289	0.0039038	0.0918155
Lama5	3.5191	1.15045	-0.87119	3.22948	0.268654	-0.87119	0.212833	-0.87119	-0.579233	3.42878	0.00390472	0.0918155
Zfp574	0.20627	1.22323	-0.382926	2.41763	2.18229	-2.24767	0.0276048	-0.638842	-0.389452	3.30455	0.00391545	0.0919687
Mospd1	-3.32523	-0.458862	-5.26214	0.268973	0.778902	1.77756	1.05799	0.54789	1.01791	3.30208	0.00393612	0.092355
Plin5	-3.00199	-3.00199	-3.00199	-1.55778	-0.179967	-3.00199	-0.48511	-3.00199	-0.821351	3.62819	0.00395883	0.092754
Snip1	2.32743	3.67796	1.86946	3.69895	2.03326	0	1.51362	2.32616	-0.626688	3.35331	0.00396163	0.092754
Zfpm1	1.93632	2.54921	0	0	2.6803	0	0	0	-0.885046	3.79384	0.00396792	0.0928018
Cdh23	3.05685	3.14483	-1.19976	1.49267	2.67266	4.37899	-1.19976	0.409044	-0.246947	3.35181	0.00397393	0.0928342
Zfp715	-1.78687	-2.40164	-5.28573	-0.693919	-0.858333	-5.28573	-5.28573	-3.80403	-0.157625	3.41938	0.00397782	0.0928342
Ggta1	0.927443	-2.95668	-3.88926	0.388702	-0.274544	-3.88926	-3.88926	-2.18558	-0.326075	3.41872	0.00398297	0.092836
Zfp707	1.10482	-0.351341	-3.62702	-0.916083	1.08874	-3.62702	-0.405123	-3.62702	-0.321512	3.41828	0.00398641	0.092836
Rbm12b1	-1.45815	-1.45815	-1.45815	1.09672	-1.45815	-1.45815	1.4054	-1.45815	-0.8841	3.78961	0.00399466	0.0928726
Zfp120	1.02208	0	0	3.9574	1.14011	0	1.63886	1.62531	-0.768729	4.38425	0.00399649	0.0928726
Ltbp4	-2.19543	-0.151256	-3.56351	1.72197	0.313883	1.76337	-1.66644	-1.24354	-0.134528	3.29289	0.00401401	0.0931806
Kcnh1	-3.33205	-1.10596	-1.46319	0.933919	-1.08603	-3.33205	-3.33205	-1.08602	-0.603282	3.41364	0.00402311	0.0932884
F8	-3.88112	-0.119218	0.301831	-1.57637	-3.88112	0.443841	-0.644833	-3.88112	-0.470485	3.41312	0.00402721	0.0932884
Nsun3	-2.0686	-3.6321	-3.6321	-1.60801	-1.52379	-3.6321	-3.6321	-1.20193	-0.75754	3.50014	0.00403176	0.0932948
Zfp90	1.68157	0.281789	-0.825104	1.62256	0.928229	-2.69162	2.36947	-2.69162	-0.231871	3.34022	0.00406989	0.0940461
Acox3	-1.29456	1.13361	-2.68318	2.77243	0.583717	1.87575	1.51138	2.70799	0.0645255	3.28607	0.00407284	0.0940461
Tle3	1.26547	-0.520507	-3.39402	0.944871	0.144972	-3.52264	-0.440599	-3.62974	1.34404	3.24115	0.00408241	0.0941673
Tmem185b	-1.10009	-0.793479	-3.43318	0.333935	-0.467771	0.228467	-3.43318	-1.95164	-0.558166	3.33815	0.00408729	0.0941768
Bpifb1	-2.39427	-2.47621	-1.5438	-0.544133	-3.41625	-3.41625	-2.32887	-1.93186	-0.763654	3.53901	0.00409145	0.0941768
Zfp94	-2.59578	0.477642	-2.59578	0.361247	-2.59578	-2.59578	-2.59578	-0.16565	-0.760973	3.60836	0.00409819	0.0942324
Tcp10a	-1.45888	-1.45888	0.418018	0.681201	-1.45888	-1.45888	-1.45888	-1.45888	-0.936902	3.77246	0.00410523	0.0942949
Glis3	2.97955	3.15003	0	0	2.98537	0	2.74635	2.89231	-0.71359	3.48923	0.00411487	0.0944171
Brca2	-2.66611	-3.14913	-5.36646	-1.8914	-2.53574	-2.45618	-2.86873	-3.66291	-0.317281	3.27955	0.00412996	0.0946636
Tal1	-2.68874	-2.68874	-2.68874	-2.68874	-2.68874	-2.68874	-1.59778	-2.68874	-0.93468	4.01124	0.00417312	0.0954173
Net1	-0.129788	-0.15778	-3.85228	-0.744086	-2.1842	-3.85228	-3.85228	-1.03327	-0.507696	3.39486	0.00417502	0.0954173
G2e3	2.00993	0.94346	3.31591	1.4466	0	0	0	0	-0.902093	5.03393	0.00417683	0.0954173
Mas1	-2.88497	-2.08193	-1.05169	-4.25422	-1.18717	-4.82871	-1.14993	-2.16043	-0.363749	3.27387	0.00418033	0.0954173
Gsap	2.10553	-1.1991	-0.765368	1.62026	3.20217	0.261463	2.71067	0.251919	0.118503	3.22701	0.00421126	0.0959957
Chtf18	0	0	0	0	3.13595	0	0	0	-0.935888	4.42438	0.00421447	0.0959957
Gm9222	0.327456	-1.08342	-5.22906	-1.3941	-1.95689	1.35566	-0.588699	-5.22906	0.33432	3.32194	0.00422611	0.0961604
Gm46796	2.93382	1.44359	0	0.919994	0	0	0	0	-0.912127	3.75299	0.00423464	0.0962122
Runx2	0	0	0	0.919719	0	0	2.8655	0	-0.937412	4.00037	0.0042372	0.0962122
Chrna4	0.940922	-1.33079	-4.20462	0.41679	-0.183839	0.335081	-1.56187	-4.20462	-0.0730984	3.31931	0.00424913	0.0963236
Shprh	-1.39079	-2.41078	-2.31046	-0.669607	-1.78737	-2.47255	-5.30397	-2.87254	-0.120132	3.26602	0.00425093	0.0963236
Plscr2	0	2.41177	0	1.91288	2.77714	0	0	0	-0.90072	3.7488	0.00426304	0.0964881
Gm6546	2.20959	1.895	0.8915	1.79194	0.0447375	-0.979976	1.92807	-0.979976	-0.722934	3.31727	0.00426704	0.0964881
Rgs16	-0.721459	-3.84878	-0.77726	0.732458	-0.845095	-3.84878	-0.738245	-3.84878	-0.419229	3.38277	0.00427588	0.0965879
Cenpu	-2.67585	-1.73252	-2.67585	-2.67585	0.0047065	-2.67585	-2.67585	-2.67585	-0.894882	3.74623	0.00428061	0.0965948
Zmat4	-5.39588	1.09615	1.88423	-0.876265	0.0768506	-5.39588	-0.790526	-1.43909	0.793668	3.31412	0.00429485	0.0968161
Ano3	-3.12493	-4.14619	-4.14619	-2.52849	-4.14619	-4.14619	-2.63491	-2.2459	-0.718101	3.46492	0.00430648	0.0969781
Epn3	-2.26164	-2.26164	0.223836	-2.26164	-0.00753561	-2.26164	-2.26164	-2.26164	-0.89905	3.74167	0.00431186	0.0969878
Vars2	0.0431073	-0.456708	-4.40117	-0.620384	-0.662055	-4.40117	-4.40117	-4.40117	-0.30488	3.46377	0.0043158	0.0969878
Rbm46	-4.57694	-2.92235	-1.03893	-1.42934	-4.57694	-1.7437	0.433208	-1.0546	-0.28426	3.31013	0.00433026	0.0972063
Rnf20	-0.740088	-1.83744	-3.48508	-1.21663	-1.64572	-7.82413	-0.383725	-1.69047	1.857	3.25691	0.00433444	0.0972063
Trim6	0	0	0	2.03363	0	2.53914	0	0	-0.947434	3.98314	0.00434098	0.0972532
A330001L22Rik	2.76879	0.519877	0.644302	-0.0929552	1.19994	-1.70695	0.798313	-1.70695	-0.617765	3.30839	0.00434588	0.0972631
Spidr	0	2.03412	0	2.28317	2.49662	0	3.06079	1.48589	-0.830759	3.45682	0.00437236	0.0977553
Zbed4	2.4625	2.03517	0	2.87423	0	0	0	0	-0.861995	3.73162	0.00438165	0.0978312
Gm16867	-2.43403	-2.43403	-2.43403	1.13707	1.10815	-2.43403	-2.43403	-2.43403	-0.749619	3.73118	0.00438472	0.0978312
Ccdc103	3.09492	1.62236	0	1.77723	0	0	2.22948	0	-0.845696	3.56863	0.00439304	0.0978977
Slc25a37	-2.11642	-0.294525	-3.48375	-0.798594	0.374804	-3.48375	-1.47934	-3.48375	-0.62753	3.36861	0.00439723	0.0978977
Zfp316	0	0	3.31417	2.02985	1.58299	0	2.23609	1.60865	-0.852271	3.45291	0.0044045	0.0978977
Zfp280c	0.153889	-0.980769	-0.980769	2.23451	0.159498	-0.980769	0.525709	-0.980769	-0.855952	3.45218	0.00441058	0.0978977
Nin	-0.924936	-0.992945	-6.47795	-1.76087	-1.63842	-3.93958	-3.22617	-6.47795	0.522195	3.30098	0.00441279	0.0978977
Tex21	1.35992	0	0	2.28487	0	0	2.86369	0	-0.888138	3.72693	0.00441461	0.0978977
Crebzf	-2.29521	0.453878	0.412356	-0.668392	-4.2591	-1.72563	0.838943	0.260251	-0.0171453	3.24505	0.00444564	0.0983796
St3gal1	0	0	0	2.4095	0	0	1.09122	0	-0.948754	3.96599	0.00444699	0.0983796
Slc25a48	0	0	2.34691	4.02946	0	0	0	1.48446	-0.76805	3.72196	0.00444987	0.0983796
Stk3	-0.306007	0.427769	2.17095	2.4638	-0.545971	-0.482911	0.15425	-2.45047	0.409373	3.19976	0.00447123	0.0987518
Lcp1	-0.713611	-3.83561	-1.83742	-0.0521399	0.283766	-4.77347	-2.53254	-2.3487	-0.0875084	3.24058	0.00448826	0.0990044
Cep250	-0.0873224	-1.45678	-4.73241	-0.0290402	1.19889	-4.73241	-1.49288	-3.12374	0.120395	3.2919	0.00449626	0.0990044
Tulp3	0.67235	-1.54132	-1.54132	-0.0689167	-1.54132	-1.54132	0.0994973	1.98721	-0.811899	3.46477	0.00449762	0.0990044
Nup205	3.19226	-1.17543	2.56322	2.83818	1.80265	-1.17543	1.51152	0.305156	-0.475769	3.29141	0.00450082	0.0990044
Mfsd4a	-1.03731	-1.45365	-2.44146	-1.4575	-0.159971	-1.65678	-0.436114	-5.74819	0.376234	3.23803	0.00451274	0.0991667
Asb14	0	0	0	2.62324	0	0	2.51695	0	-0.91042	3.95387	0.00452354	0.0992589
Sass6	1.02147	1.63076	0	2.67673	0	2.53339	2.99688	3.58737	-0.733279	3.35383	0.00452769	0.0992589
Srgn	-1.64198	0.906042	-1.64198	0.00813611	-1.64198	2.32628	-1.64198	1.8883	-0.731776	3.43787	0.00453058	0.0992589
LOC118568756	-0.982778	-1.03434	-3.0604	0.400501	-3.0604	0.237917	-0.366251	-3.0604	-0.673835	3.35166	0.00454717	0.0995225
Clgn	0.223126	0.379121	0.246115	1.88275	2.11004	-3.50472	-1.21758	-3.50472	0.0221727	3.28489	0.0045618	0.0997426
Ddx11	1.02509	0	0	0.583974	0	0	2.70516	0	-0.944328	4.40934	0.00456738	0.0997647
Steap3	1.30406	1.91375	-0.87226	2.24732	3.19743	2.11033	-0.87226	0.610612	-0.647082	3.28244	0.00458492	0.100047
Rbms2	1.88943	-0.168978	-2.56473	-1.18722	0.155363	-2.56473	-0.410811	-0.955966	-0.599577	3.28168	0.00459206	0.10007
Sec14l5	-0.321304	1.21986	-1.45506	0.315045	0.979819	-1.45506	-1.45506	2.79043	-0.708743	3.34626	0.00459599	0.10007
Fnbp4	2.51787	1.41049	0.923554	1.50854	1.568	0.348632	2.90999	-1.14426	0.0452579	3.18666	0.00460187	0.10007
Slc31a2	-3.16624	-1.79678	-4.18264	0.0218254	0.19	-4.18264	-2.76545	-0.323465	-0.351672	3.28033	0.00460489	0.10007
Cd86	2.19226	1.74708	-1.539	2.47882	-1.539	-1.539	0.965336	-1.539	-0.594101	3.42861	0.00461002	0.10007
Cxcr4	3.49135	0	0	1.09147	0	0	0	0	-0.86645	3.93992	0.00461345	0.10007
Fbxo25	-0.29447	-0.0808539	-2.15138	-0.0190269	1.22976	-6.53278	0.309163	-0.0883133	1.6769	3.22592	0.00463113	0.100353
St18	5.36818	3.94203	0	5.38261	5.90368	6.44928	3.75689	7.33203	0.979601	3.27703	0.00463642	0.100368
Zfp426	0	2.41383	0	0.583983	1.96586	0	0	0	-0.944854	4.30255	0.00464521	0.100459
Ttpal	0.838612	-0.404331	-5.29565	1.27587	-1.85571	-5.29565	0.403866	-3.68703	0.704948	3.27397	0.00466576	0.100714
Afap1l2	3.89987	2.66313	0	4.64562	3.92082	0	0	0	-0.46188	3.53422	0.00466625	0.100714
Kcnk12	-1.8514	-0.942819	-4.20254	-0.211195	-2.62586	-4.20254	-1.70081	-4.20254	-0.506223	3.33657	0.00468503	0.10102
Ccdc13	1.16844	-0.382398	3.18786	-0.000125992	-3.37155	-3.37155	-3.37155	1.52231	0.0514188	3.33588	0.0046915	0.101059
Tnpo1	2.64667	0.980664	2.23111	1.93402	4.45648	0.0482926	1.55271	1.59477	0.634085	3.17652	0.00470565	0.101174
Ppef2	0	0	0	0.58396	1.14036	0	2.70513	0	-0.943538	4.35645	0.00471002	0.101174
Mtrf1l	-0.491047	-1.08522	-4.05415	-0.732127	-0.465469	-4.05415	0.447563	-4.05415	-0.363578	3.33381	0.00471071	0.101174
Tmem253	-2.80031	0.799628	-2.80031	-2.80031	-2.80031	-2.80031	-0.902252	-1.17506	-0.783361	3.52706	0.00472529	0.101387
Pld4	-2.09236	-3.11342	-3.11342	0.487958	-1.00586	-0.580673	-2.02716	-1.50469	-0.701496	4.08655	0.00477474	0.102347
Eya2	-2.85477	0.355035	-2.85477	1.92034	1.1402	-2.85477	0.256505	-2.85477	-0.441415	3.40881	0.00478477	0.102462
Elac2	-3.40385	-1.3699	0.91344	1.50039	1.84286	2.19212	1.492	0.91583	0.164752	3.20958	0.0047957	0.102528
Pced1b	-3.7729	0.0345453	-3.03369	0.717136	-0.45549	-4.90716	-1.24272	-3.2157	0.080139	3.20943	0.00479727	0.102528
Zfp14	-0.148772	1.9814	-1.17047	2.39647	-1.17047	1.36328	-1.17047	0.313652	-0.747909	3.32334	0.00480945	0.102688
Mgme1	2.17017	0.686958	2.52376	1.73432	-1.9766	-1.9766	1.01066	-0.496089	-0.470503	3.25872	0.00481513	0.102709
Rbm20	-3.96085	-3.96085	-3.96085	-3.96085	-3.96085	-3.96085	-2.19859	-3.96085	-0.789744	3.90843	0.00482346	0.102721
Gm31305	-1.47419	0.0696796	1.67435	-1.16753	-2.60823	-2.60823	-1.52082	-2.60823	-0.765158	3.32146	0.00482738	0.102721
Shisa8	-3.31268	1.03182	-3.31268	-2.38968	-0.0504259	-3.31268	-3.31268	-3.31268	-0.654565	3.51461	0.00482983	0.102721
Zfp646	-2.26421	0.949148	-2.82498	-0.867544	-2.21668	-1.78374	-4.6918	-4.6918	-0.216847	3.25464	0.00485592	0.103175
Fancl	-2.05674	-3.19148	-3.19148	-1.74564	-3.19148	-3.19148	-3.19148	-3.19148	-0.878197	3.66668	0.00486232	0.103211
Egr3	-2.56621	-2.66504	-4.30437	-0.481731	-4.30437	-4.30437	-2.88945	-2.6956	-0.57137	3.31677	0.00487244	0.103325
Piezo2	-2.30289	0.149381	-3.4361	-1.11932	-3.4361	-3.4361	-3.4361	-3.4361	-0.754636	3.50813	0.00488521	0.103495
Dnah10	-2.13645	-3.52967	-3.52967	-0.375311	0.466958	-3.52967	-3.52967	-1.90403	-0.639894	3.39636	0.00489812	0.103624
Eva1b	3.1477	0	2.72264	2.91027	2.83685	2.53046	4.16419	0	-0.605364	3.31358	0.00490341	0.103624
Otx2	2.2648	0.0391134	1.50656	0.175244	-3.24199	-3.24199	-0.938953	-1.76124	-0.225255	3.24941	0.00490862	0.103624
Pi4k2a	0.477498	-1.49654	-2.9341	-0.356514	-0.397254	-6.24946	-1.98301	-1.24673	0.943357	3.1982	0.00491385	0.103624
Six3	2.21471	0	3.31373	1.99196	2.25285	0	1.41091	0	-0.838766	3.39452	0.00491504	0.103624
Spdya	0.659987	-1.45688	-1.45688	0.165213	2.14692	-1.45688	0.0512723	-1.45688	-0.805284	3.39308	0.00492842	0.103806
Diras1	-0.241579	0.0549658	-2.25115	-1.18547	0.262831	-4.11586	-0.614269	-4.11586	-0.311286	3.24398	0.00496403	0.104167
Ids	1.95497	-1.30869	-1.93376	-0.251891	-0.699257	-1.76142	-1.05955	0.391415	4.39754	3.15215	0.00496487	0.104167
Piezo1	0	0	0	3.20403	0	0	0	0	-0.894708	4.28357	0.00496505	0.104167
Vasp	-2.25137	-2.94365	-1.71971	-0.99202	-0.0370153	-4.7049	-1.86156	-4.7049	-0.330051	3.24383	0.0049656	0.104167
Zfp628	0	2.41487	0	0.584336	0	0	0	0	-0.965154	4.56242	0.00497332	0.104167
Akap8	-0.980846	-1.09103	-1.5275	0.218838	0.35286	-2.30256	-1.39295	-4.837	0.0334351	3.19249	0.00497419	0.104167
Pikfyve	0.390323	-1.85262	-6.40391	0.614711	-0.39032	-6.40391	0.673069	-2.31092	1.33289	3.24179	0.00498654	0.104325
Vwa3b	1.36346	3.42239	0	2.79603	0	0	2.68179	1.60869	-0.776242	3.38588	0.00499571	0.104417
Ano2	0	0.943994	0	2.40861	0	0	0	1.60862	-0.929916	3.64872	0.00500489	0.104509
Dgkd	-0.911398	-0.937473	-2.96271	-1.28548	-0.0376941	-3.42997	-2.43962	-5.96842	0.417481	3.18846	0.00501729	0.104638
Phf20l1	0.394333	-1.66074	-4.05796	0.681869	0.0819292	-5.93567	0.891099	-3.78433	1.1085	3.18798	0.00502249	0.104638
Uggt2	-3.73668	-1.72132	-3.73668	-0.901453	-2.59754	-3.73668	0.412268	-3.73668	-0.628495	3.38272	0.00502548	0.104638
Best3	-1.97904	2.10329	-1.97904	2.19639	-0.839203	-1.97904	1.01162	-0.497321	-0.57286	3.29881	0.00504917	0.105031
Uhrf1	-3.28935	-0.059763	-3.28935	-1.61966	-2.14917	-3.28935	-3.28935	-3.28935	-0.797586	3.48844	0.00505749	0.105104
Kat6b	-1.76415	-1.59076	-1.93312	-0.830795	-2.33446	-5.15387	-1.6127	-5.65216	1.69296	3.14285	0.00506762	0.105215
Fam166b	-1.24228	1.74132	1.8487	1.9178	-2.98191	-0.448905	1.9912	0.582292	-0.0367249	3.18273	0.00507923	0.105319
Abca4	-0.337475	-1.727	-1.727	0.455716	-1.727	1.2511	1.95136	-1.727	-0.76685	3.37667	0.00508301	0.105319
Gm14114	1.13405	1.62868	0	2.64661	3.28509	0	3.2989	0	-0.766847	3.37614	0.00508811	0.105319
Cd72	-2.14206	-2.1796	0.616724	-0.295146	-3.79115	-3.79115	-2.7074	-1.54553	-0.5621	3.23168	0.00509196	0.105319
Cdk19	-2.63969	-1.17845	-5.55742	-0.231861	-0.00342515	-5.55742	-0.173336	-3.29394	0.324539	3.23026	0.00510687	0.105527
Calcb	2.67931	2.55769	0	1.50594	0	0	0	0	-0.889727	3.63485	0.00511798	0.105636
Cyp2j6	1.48989	0.181791	-2.80791	2.24662	1.30598	-2.80791	1.53757	2.81661	0.064498	3.22808	0.00513001	0.105636
Pprc1	-0.74814	-1.57961	-0.39071	-5.23203	0.570967	2.09571	-0.438361	-0.213342	0.783825	3.17797	0.00513115	0.105636
Abcb9	0.999798	2.55255	3.42939	3.0727	2.36258	-1.20112	-1.20112	2.01372	-0.398602	3.22794	0.0051315	0.105636
Pomgnt2	2.39973	2.9023	0.408877	2.36628	1.78035	-3.15039	2.71552	0.760361	0.584187	3.1751	0.00516285	0.106181
Gm15212	-3.87217	-0.418445	-1.36661	-0.899674	-1.5634	-0.57799	-1.97534	-2.24631	-0.555297	3.17433	0.00517137	0.106257
Tprn	-0.0492428	0.045583	-2.59584	-0.778338	0.832395	-0.0624489	-2.59584	-2.59584	-0.733004	3.28476	0.00519192	0.1065
Gm33649	-0.782058	-1.2829	-2.72126	-2.14059	-1.14025	-2.72126	0.789647	-1.02936	-0.770948	3.22218	0.00519296	0.1065
Cngb1	1.65536	0	0	2.13952	0	0	1.89887	0	-0.924202	3.62496	0.00520023	0.106549
Ctc1	2.73914	-0.980359	-0.980359	0.793572	1.97451	-0.980359	-0.980359	-0.980359	-0.789986	3.47175	0.00520842	0.106616
Chrnb4	2.39783	0	0	2.79114	2.72229	0	0	4.46476	-0.665521	3.47005	0.00522406	0.106827
Gm30439	0	0.939202	2.34826	3.84701	1.76715	0	0	2.2615	-0.726225	3.3617	0.00522849	0.106827
Cdo1	-0.102741	-0.670773	-2.109	0.761934	1.37624	-2.109	-2.109	-0.62454	-0.76762	3.27935	0.00524793	0.106987
Glmn	0.112985	-2.09366	1.41711	0.62424	-1.01079	-1.38714	0.687163	-1.82373	1.7199	3.1265	0.00525331	0.106987
Ager	1.98385	-0.980767	-0.980767	1.7036	0.159499	-0.980767	-0.980767	-0.980767	-0.855389	3.46679	0.00525421	0.106987
Mtmr1	-4.10487	-4.03161	-6.3096	-2.37094	-3.08994	-2.66005	-0.758591	-1.02214	1.57963	3.12627	0.00525597	0.106987
Mmp16	1.23103	-1.97536	-2.33419	-0.289633	-4.20458	-4.20458	0.887344	-0.727177	-0.075562	3.21566	0.0052635	0.107041
Rbm12b2	0.917866	0.243463	-1.79307	-1.79307	-1.79307	-1.79307	-1.79307	-1.79307	-0.899015	3.61601	0.00527588	0.107193
Rps6kl1	-4.57203	-2.29251	-5.59612	-0.631777	-1.66227	-1.93786	0.172536	-1.50458	0.224584	3.16053	0.00532639	0.108118
Gask1b	-3.26359	-3.26359	-3.26359	-0.422415	0.167512	-3.26359	-0.568737	-1.56397	-0.700649	3.3503	0.00534214	0.108147
Birc3	-3.28838	-2.13555	-4.68303	-2.3068	-3.65964	-4.68303	-4.68303	-3.20095	-0.599142	3.27009	0.00534534	0.108147
Rftn1	3.42856	2.02753	3.42217	2.22612	2.64306	0	2.69546	0	-0.720029	3.26943	0.00535237	0.108147
Acss3	-0.132486	-0.37784	0.289748	-1.07771	-1.87094	-3.01075	1.51818	-1.52931	-0.549731	3.15807	0.00535452	0.108147
Pknox1	-4.54102	-0.971941	-1.60485	-1.23516	-0.349362	-4.54102	-3.45912	-4.54102	-0.444107	3.26895	0.00535746	0.108147
Nbeal1	-2.08229	0.508233	-4.29424	-2.38736	-2.26549	-7.35427	-2.54367	-0.82656	1.45646	3.15757	0.00536022	0.108147
Ankrd61	2.63052	0	0	0.583749	0	0	0	1.48709	-0.930805	3.8462	0.0053625	0.108147
A130010J15Rik	-1.31341	-1.31341	2.9697	1.08214	2.23078	-1.31341	-0.227635	1.87928	-0.661825	3.26689	0.00537944	0.108272
Gmeb1	-0.915162	0.787095	-5.50411	0.138886	-3.00583	-0.270692	-1.19687	2.76786	1.11284	3.15585	0.00538006	0.108272
Katnip	1.94416	0.76181	-0.943783	1.33198	-0.317562	-3.29726	-3.29726	-1.59547	-0.182497	3.20404	0.00539166	0.108272
Oxtr	3.69828	2.01314	0	2.48283	1.14009	0	0	1.69893	-0.75455	3.34535	0.00539227	0.108272
Zfp558	2.95859	3.81062	-1.30764	4.07791	3.60366	1.22743	2.91672	0.177263	0.068231	3.15468	0.00539353	0.108272
Nfil3	2.82218	1.62555	0	2.28148	0	0	0	2.97247	-0.802686	3.4512	0.00540074	0.108318
Gm1604a	2.37306	1.91965	-1.367	1.43351	-1.367	2.71032	-1.367	1.1353	-0.604188	3.26142	0.00543819	0.108885
Vangl1	3.73065	2.89174	0	2.23464	2.03475	0	2.22694	1.69944	-0.717072	3.26135	0.00543901	0.108885
Casp9	1.97823	1.80255	0.998354	1.14949	2.72686	2.10643	-0.873219	-0.873219	-0.727684	3.19875	0.00545104	0.10891
Adcy4	-2.83077	-2.83077	-2.83077	-2.83077	-2.83077	-2.83077	-0.680522	-2.83077	-0.89911	3.82191	0.00545507	0.10891
Btbd9	-3.97214	0.36126	1.46896	1.63294	0.62746	-3.97214	-0.36721	-0.556321	0.101239	3.19733	0.00546714	0.10891
Fam185a	1.02466	2.41239	0	0	1.14033	0	0	2.26343	-0.914505	4.13899	0.00546842	0.10891
Zfp775	2.21408	2.0335	0	0	2.86759	2.53639	1.50741	2.35006	-0.817948	3.25853	0.00546955	0.10891
Gm34057	3.20804	0.941741	2.48989	1.90936	0	0	2.32446	0	-0.813355	3.33774	0.0054702	0.10891
Slc4a1ap	0.749417	-2.15309	-2.04551	-0.17351	-0.216949	-6.11919	-0.912916	-2.2524	0.923232	3.14623	0.00549206	0.109189
Rhobtb1	2.64263	2.90306	-0.875081	4.37923	2.67815	-0.875081	4.63734	4.68279	0.149452	3.19471	0.00549686	0.109189
Lrmda	2.94429	0.712228	-2.86625	2.20029	1.18046	-2.86625	0.189414	1.68052	0.130453	3.1945	0.00549923	0.109189
Lratd2	2.79946	1.3753	-2.06885	0.303445	1.8671	-2.06885	0.920363	0.17536	-0.404465	3.1922	0.00552555	0.109468
Trappc8	-1.45972	0.255876	-0.00768707	1.28332	1.64654	-6.1198	-0.292946	-6.1198	1.54766	3.19205	0.00552722	0.109468
Ksr2	-3.17645	-0.388904	0.608204	-0.800801	-1.50651	-3.17645	-3.17645	-0.65504	-0.677101	3.25315	0.00552831	0.109468
Nhs	-0.584674	1.59676	-1.97955	1.29301	1.87981	-1.97955	1.52657	-1.97955	-0.591821	3.25171	0.00554424	0.109683
Rskr	1.9835	-0.372215	-3.47436	1.30415	1.08365	-3.47436	2.12226	-3.47436	0.122166	3.24973	0.0055661	0.109857
9130002K18Rik	-3.84601	-0.307941	-1.97959	-1.14921	-1.47601	-1.31819	-0.254991	-0.193607	-0.477565	3.13963	0.00557019	0.109857
Satb2	-3.66062	-3.66062	-3.66062	-3.66062	-3.66062	-3.66062	-3.66062	-3.66062	-0.862467	4.18411	0.00558343	0.109857
Cfap54	-0.916581	-0.814317	-4.00241	1.58147	-2.9791	-1.47226	-1.1515	-0.00872735	-0.142035	3.13852	0.00558351	0.109857
Nr4a3	-3.09808	-0.861256	-3.09808	-0.55095	-0.614021	-3.09808	-3.09808	-3.09808	-0.808547	3.43195	0.00558765	0.109857
Arhgap39	-3.13794	-0.668066	-3.13794	-0.759959	-1.37904	-3.13794	0.809029	-0.817893	-0.658923	3.24777	0.00558778	0.109857
Fmo4	0	0	0	0	0	0	2.51889	0	-0.963324	4.18336	0.00558841	0.109857
Dok2	-0.393616	-3.27965	-3.27965	-1.26485	-3.27965	-3.27965	-3.27965	1.71994	-0.533523	3.43138	0.00559328	0.109857
Shisa7	0.370099	-1.12369	-3.99886	0.0960332	-0.237416	-3.99886	-2.91801	-2.51951	-0.368339	3.18438	0.00561569	0.109892
Etnk2	0.290892	0.353552	-2.04397	1.24317	1.79417	-2.04397	-2.04397	1.00577	-0.63186	3.24483	0.00562055	0.109892
Vash1	-3.47815	-1.46279	-1.60786	-0.570374	-0.805257	0.182586	-1.4726	-3.47815	-0.654926	3.1839	0.00562129	0.109892
Slc5a7	0	2.24103	0	2.40724	2.48657	0	0	0	-0.898529	3.57609	0.0056277	0.109892
Gprin3	-2.62884	-0.997649	-2.62884	-0.758615	0.490764	-2.62884	-2.62884	-2.62884	-0.823088	3.42733	0.00563351	0.109892
Abcc1	-1.59387	-0.583283	-2.6175	-1.01686	-2.6175	-2.6175	0.385162	-2.6175	-0.833833	3.32181	0.00563733	0.109892
Micall2	2.15232	0.942079	0	3.13694	2.18422	0	0	0	-0.82057	3.42658	0.00564099	0.109892
Trmo	-3.26158	-1.63089	-3.26158	-2.67922	-3.26158	-3.26158	-3.26158	-0.998744	-0.834638	3.42622	0.00564453	0.109892
Cracdl	-1.33839	-1.45296	-0.391211	-3.19871	-1.29397	-5.21489	-1.47344	-5.21489	-0.156981	3.18167	0.00564741	0.109892
Ebf4	0	0	0	2.85868	0	0	0	0	-0.93105	4.17423	0.00564932	0.109892
Mdm4	-0.0144364	-0.893689	-1.52738	-1.27478	-1.34479	-3.20019	-2.49462	-5.73872	0.318277	3.13267	0.0056539	0.109892
Msr1	-2.67642	-2.67642	-0.799747	-2.67642	-2.67642	-2.67642	-2.67642	-2.67642	-0.926415	3.79668	0.00565551	0.109892
LOC118568312	0.46952	0.787418	0.964153	0.0805326	2.76155	0.253263	0.397572	0.275331	11.4588	3.09243	0.00566271	0.109934
Gt(ROSA)26Sor	-1.24813	0.0992335	-4.12503	-1.23904	-3.10318	-4.12503	-0.47239	-1.88051	-0.440293	3.17873	0.00568186	0.110147
Gm9224	0	0.943263	0	0.955737	0	0	3.51503	0	-0.891334	6.44081	0.00568709	0.110147
Dcp1b	-0.311691	0.701173	3.11579	0.695558	-3.01444	-3.01444	1.08551	-0.649923	-0.198721	3.17798	0.00569067	0.110147
Chdh	-1.9686	-0.589303	-2.98949	0.409324	-0.554901	-2.98949	0.358842	-2.98949	-0.686129	3.23816	0.00569562	0.110147
Dock7	-0.0192122	-1.23846	-1.58157	-0.744484	-1.50182	-5.41044	-2.34618	-3.39412	1.97834	3.08876	0.00570872	0.110147
Fbf1	-3.41089	-0.476651	-4.4283	-1.40098	0.0963734	-4.4283	0.396965	-4.4283	-0.271091	3.23672	0.00571191	0.110147
Aste1	-3.39605	-2.45896	-3.39605	0.884914	-2.37243	-3.39605	-0.704272	-1.69534	-0.618981	3.23668	0.00571245	0.110147
Tafa4	0.245368	-0.652381	3.60268	2.33627	1.22677	-2.68251	0.657426	2.00019	0.0386548	3.12773	0.00571403	0.110147
Eng	2.224	3.53154	-1.70818	1.61377	1.1021	-1.70818	1.1718	-0.0044631	-0.359381	3.17424	0.00573496	0.110326
Abraxas1	-3.70334	-0.872854	-1.01912	-2.34726	-5.07372	-5.07372	-1.11736	-1.20423	-0.217048	3.17397	0.00573823	0.110326
Zfp143	-2.37291	-1.37395	-5.01259	-0.600818	-5.01259	-2.48259	-0.356354	-1.74369	-0.146971	3.17394	0.0057385	0.110326
Fibcd1	1.13414	2.40474	0	1.22528	2.31375	0	1.89803	3.71392	-0.779107	3.23288	0.00575578	0.110532
Tgfbrap1	0.209102	1.81992	-1.64373	2.23239	2.80712	-1.64373	2.22483	-1.64373	-0.472425	3.23238	0.00576153	0.110532
Zfp280d	-0.263355	-0.608015	-4.56026	0.0441572	-0.135754	3.0937	1.43145	-0.58579	0.629622	3.12364	0.00576441	0.110532
Tedc2	-0.681679	-1.70491	-1.70491	-0.0429842	-1.70491	-1.70491	0.845444	1.64986	-0.813408	3.30934	0.00577177	0.110576
Lzic	0.111413	0.781236	-4.66976	1.11238	-0.73539	-4.66976	-1.42579	0.862605	0.408767	3.17033	0.00578169	0.110669
Slitrk3	-3.84203	-1.25135	-2.14162	-0.202332	0.427618	-0.716524	-0.210718	-3.80882	0.795688	3.08237	0.0057896	0.110697
Ercc6l2	2.43531	2.67698	0	3.02236	1.67065	3.52978	0	1.69222	-0.750441	3.22961	0.00579329	0.110697
Ago1	-0.238215	-1.46983	-5.95894	-1.04019	1.10424	-5.95894	-4.31569	-1.18796	0.673065	3.1687	0.00580123	0.110751
n-R5s138	-1.92769	0.294807	1.37162	1.72829	4.38572	2.39874	0.984061	1.71709	-0.202256	3.12025	0.00580639	0.110753
Slc10a1	-1.93318	-1.93318	-1.93318	-1.34956	-1.93318	-1.93318	0.771168	-1.93318	-0.922884	3.55603	0.00581372	0.110795
Ndor1	-4.50831	-1.84667	-4.50831	-0.94362	-0.531295	-4.50831	-0.772034	-4.50831	-0.429011	3.30464	0.00582324	0.110795
Wtip	-2.85435	-0.217901	-2.85435	-2.27211	-1.82802	0.120242	-2.85435	-2.85435	-0.82505	4.03912	0.00582384	0.110795
Ppp1r12b	-1.09005	-1.01231	-0.895815	0.138496	2.12216	-5.59116	-1.36312	-0.341825	0.924273	3.11699	0.00584705	0.11114
Cnksr3	-3.34431	-1.57946	-0.989413	-0.904872	0.435505	-3.34431	1.96791	-3.34431	-0.474595	3.22378	0.00586094	0.111307
1700019D03Rik	-0.723022	-4.77931	-4.77931	-0.394826	0.548605	-4.77931	-0.886573	-4.77931	-0.0918992	3.30075	0.00586626	0.111311
Gm16794	1.93667	1.59354	0	0	0	0	2.86408	0	-0.899372	3.54864	0.0058839	0.111477
Slc26a10	3.04489	-0.035403	1.76454	1.08254	1.39307	-4.23969	-0.630696	0.374434	0.893329	3.11393	0.00588555	0.111477
Slc39a2	-1.70892	0.457204	-2.73151	-1.7788	-2.73151	-2.73151	-0.219484	-1.03327	-0.791257	3.22126	0.00589035	0.111477
Slc6a13	-2.80976	-2.80976	-2.80976	-2.22619	-1.66943	-2.80976	-2.80976	-2.80976	-0.919544	4.17775	0.00589801	0.111477
Ccne2	0.896404	-2.25188	-0.94145	-0.306274	-4.01363	-4.01363	-2.59663	-2.3172	-0.375799	3.1604	0.00590194	0.111477
Arhgap42	0	1.44237	1.87551	2.62147	1.0267	3.12465	0	0	-0.868011	3.29721	0.00590566	0.111477
Acp6	-3.51928	-1.12257	-1.16803	-2.41699	-1.56102	-0.535377	0.523569	-2.03692	-0.617758	3.11167	0.00591411	0.11154
St6gal1	-2.8732	-0.871152	-4.00552	-0.698373	-2.33852	-4.00552	-2.48646	0.98444	-0.401067	3.15869	0.00592283	0.111568
Map4k3	1.43638	-0.535143	-5.13232	0.955557	-1.60407	1.10776	1.32705	-3.50741	0.941992	3.11075	0.00592583	0.111568
Krt77	-3.10534	-3.10534	-3.10534	-1.65947	-3.10534	-3.10534	-1.59939	-3.10534	-0.879097	3.54123	0.00595508	0.112022
Hipk1	2.64765	1.53162	-1.14135	1.17697	0.715202	0.463497	-0.636692	-0.131434	3.26712	3.0689	0.00596409	0.112095
Dcun1d2	-1.11817	-0.319201	-6.29417	-0.539645	-0.88724	-2.52943	-2.48895	-2.82043	0.700009	3.10697	0.00597408	0.112107
Gm52321	0.348277	-0.884679	-3.49542	-1.16831	-1.12407	-3.49542	0.262801	-3.49542	-0.560789	3.21383	0.00597821	0.112107
Dcaf15	-4.16526	-1.28839	-2.30013	0.469199	-0.717501	-4.16526	0.477874	-2.53909	-0.294019	3.15318	0.00599097	0.112107
Lrrk1	-2.05099	-2.05099	-2.05099	-0.138599	-1.02411	-2.05099	0.812683	-2.05099	-0.88781	3.3923	0.0059941	0.112107
Glb1l2	0	0	0	2.80467	0	0	0	0	-0.934555	4.12432	0.00599554	0.112107
Gm41033	0	0	0	2.80467	0	0	0	0	-0.934555	4.12432	0.00599554	0.112107
LOC118567326	0	0	0	2.61392	1.58307	0	1.15321	2.83441	-0.858317	3.3914	0.00600358	0.112117
Ndufaf1	0.498192	-0.61013	-4.94913	-0.0700021	2.19785	-4.94913	0.297323	-0.849243	0.572282	3.1519	0.00600688	0.112117
Vwa3a	-3.13964	-3.13964	-3.13964	-2.21944	-3.13964	-3.13964	-2.04941	-3.13964	-0.89165	3.53543	0.00601151	0.112117
Sh2d6	0.148386	-0.876152	-0.876152	1.35981	-0.876152	-0.876152	1.82759	-0.876152	-0.906005	3.39011	0.00601739	0.112131
Cacng7	-1.37184	0.125135	-0.833117	-0.0534441	0.66935	-1.60291	-2.68462	-4.58236	-0.020461	3.10244	0.00603241	0.112281
Crocc	0.0425007	2.24999	-0.980494	2.02062	0.159699	-0.980494	1.00209	-0.980494	-0.805987	3.20902	0.00603572	0.112281
Prr14	0.321001	0.9528	-4.22442	2.0284	-0.645624	-1.68591	-0.98035	0.417628	0.333217	3.10161	0.00604305	0.112321
Wfdc2	-2.47133	1.39629	-2.47133	-1.39878	-2.47133	-2.47133	-1.38302	-2.47133	-0.797362	3.38616	0.0060597	0.112535
Zscan2	0.734951	2.19055	-1.54099	3.74918	2.39169	4.38638	3.51869	1.35178	0.0778226	3.09767	0.00609436	0.112952
Edrf1	-2.71216	0.174072	-2.71216	1.43473	-2.71216	-2.71216	0.280044	-0.386002	-0.611739	3.28001	0.00610117	0.112952
Sema6b	-2.07757	-0.206678	-4.04403	-2.82543	-1.27323	-4.04403	-1.35402	-2.56231	-0.573299	3.14433	0.00610193	0.112952
4933427D14Rik	-0.375121	-1.99749	-6.1733	-0.726521	-6.1733	-6.1733	-0.617587	-4.47691	0.522128	3.20347	0.00610284	0.112952
Slc25a43	-3.46723	-1.6587	-2.51036	-1.71986	-1.27559	-4.86693	-0.176077	-4.86693	-0.298511	3.14259	0.00612396	0.113247
Cfap206	-1.78282	-1.59183	-4.8665	-2.47675	-0.731919	-2.3412	-1.34467	-3.38739	-0.343413	3.09495	0.00613006	0.113263
Vldlr	-0.556326	-0.844216	-4.24992	-0.099548	-0.479987	-6.72723	-0.59556	-6.72723	1.21748	3.13956	0.00616258	0.113768
Fbxl13	1.49556	0.682631	-1.92884	-1.92884	1.74629	-1.92884	1.57785	0.897423	-0.612457	3.19775	0.00617274	0.113859
Wdr59	-0.147395	1.56329	-2.66557	2.06853	1.61824	-2.66557	0.0177831	-1.18634	-0.329887	3.13768	0.00618667	0.11402
Ttc13	-1.6714	-0.29812	-3.70957	-0.99745	-1.38116	-0.971062	-0.901637	-6.64537	0.967298	3.09019	0.00619288	0.114038
Nfya	-0.0574024	0.441691	-1.19174	1.1284	-1.19174	-1.19174	2.47326	-1.19174	-0.8032	3.26929	0.00622628	0.114467
Tbr1	-3.13962	-3.13962	-3.13962	-3.13962	-1.17486	-3.13962	-3.13962	-3.13962	-0.890326	3.72973	0.00622667	0.114467
Zfp40	-1.09351	-1.51031	-5.33163	-2.38047	-0.302758	-2.79712	-0.200508	-3.72293	0.0371949	3.08704	0.00623496	0.114523
Ncln	-2.1271	-2.06129	-4.94035	-1.05565	-0.736949	-4.94035	-1.36408	-1.82212	-0.253499	3.13334	0.00624267	0.114568
Hrh1	0.244856	1.11178	-2.84104	-0.947006	-0.00810177	2.38061	-0.856419	-2.84104	-0.464709	3.1326	0.00625231	0.114648
Map3k1	-1.98355	0.62967	-1.98355	0.0808427	0.552868	1.77349	1.14483	-1.98355	-0.735491	3.19082	0.00625863	0.114668
Slc19a3	-2.21442	-4.99999	-2.65299	0.181709	-1.06881	-4.99999	-1.87048	0.125163	0.023431	3.13117	0.0062708	0.114794
Sorbs2	-1.31007	-1.67098	-3.79405	1.00117	-1.27785	-7.02997	0.238206	-3.75078	1.67053	3.08226	0.00629912	0.115216
Chst3	2.1323	0.654192	-1.36552	0.245226	1.51335	3.7494	1.62687	0.544586	-0.523848	3.08135	0.00631145	0.115345
Pex6	-3.13421	-0.664221	-3.13421	0.0685787	-0.250117	-3.13421	-0.849099	-3.13421	-0.706842	3.38002	0.00632136	0.11543
Rpl7a-ps9	2.58081	2.72048	0	2.23357	1.14026	0	0	0	-0.844135	3.36009	0.00634677	0.115581
Ttc38	-2.07527	-4.46895	-1.17159	-0.406483	-1.62091	-4.46895	-2.9512	-4.46895	-0.459184	3.1837	0.00634815	0.115581
Colq	2.7112	0	0	0	1.02713	2.53835	0	0	-0.913161	4.19285	0.00635231	0.115581
Rin1	-2.85041	-0.609128	-2.85041	-2.85041	-2.85041	-2.85041	-2.85041	-2.85041	-0.904666	3.71565	0.0063544	0.115581
Slco1a6	0	0.944163	0	2.03323	2.25503	0	0	0	-0.938301	3.5009	0.00635909	0.115581
Gm2075	-2.80631	-1.86298	-0.463926	-2.80631	-2.80631	-2.80631	-2.80631	-2.80631	-0.895047	5.24987	0.00636146	0.115581
Ppp4r1	3.98896	4.70322	-1.70413	2.66852	2.38709	2.84696	2.13586	-0.00759942	0.271268	3.07575	0.00638784	0.115945
Nek8	0.755841	0.503546	-1.89882	-0.675095	1.08736	2.18392	-1.89882	-1.89882	-0.739457	3.18024	0.00639208	0.115945
Zfp408	-0.824989	-0.174686	-2.19465	1.52664	2.62543	-2.19465	0.307734	-0.713401	-0.532056	3.12097	0.00640503	0.116019
Gpr161	-1.64128	-1.64128	-1.64128	2.11936	-1.64128	-1.64128	-0.229656	-1.64128	-0.802092	3.49632	0.0064068	0.116019
Skor1	-1.18893	-1.18893	-1.18893	-1.18893	1.76906	-1.18893	-0.0982614	-1.18893	-0.917959	3.58588	0.00641439	0.11606
Rasgrp1	-1.62086	-2.26282	-1.82779	-1.03919	-1.05614	-3.69868	-3.69868	-1.99895	-0.689788	3.79269	0.00643512	0.116339
Dclk2	-2.81621	-2.41826	-1.8469	-1.06665	-1.04864	-5.53027	-1.36092	-6.38419	1.74802	3.03205	0.0064689	0.116718
Pus7l	2.61861	3.52482	3.06803	3.29941	2.96686	2.90585	2.22539	0	-0.612017	3.11582	0.00647388	0.116718
Arhgap4	0.205263	-0.722184	-4.33675	-3.41114	-4.33675	-4.33675	-0.196944	-4.33675	-0.384944	3.24858	0.00647563	0.116718
Adgre5	-0.806823	-2.53915	-3.47566	-2.25647	0.914525	-3.47566	-0.351828	-1.33268	-0.592947	3.11502	0.00648472	0.116718
Zfp654	-0.704387	0.751309	0.830067	-0.0256351	-0.029704	0.686416	2.46963	-1.42529	-0.324283	3.03088	0.00648561	0.116718
Slc19a1	3.67339	1.66437	-0.869244	3.95716	2.72242	1.6573	2.85749	1.37507	-0.29088	3.06845	0.00648862	0.116718
Cchcr1	-2.13244	-1.18919	-2.13244	0.422704	-1.10553	-2.13244	-2.13244	-2.13244	-0.890708	3.34723	0.00649355	0.116718
Morn3	2.05634	1.80866	0.99969	0.5695	-0.875469	-0.875469	-0.875469	0.610611	-0.848642	3.17185	0.00649995	0.116737
Gm2622	-2.58465	-2.58465	-2.58465	-2.58465	-1.55726	-2.58465	-2.58465	-2.58465	-0.937892	4.57315	0.00651737	0.116785
Pla2g3	-2.55425	-2.55425	-2.55425	-2.55425	-1.52686	-2.55425	-2.55425	-2.55425	-0.937847	4.16988	0.00651737	0.116785
Hsf4	3.91021	2.01039	0	3.73688	3.74597	0	2.2801	1.69454	-0.558254	3.17033	0.00651966	0.116785
Stox1	-0.98093	0.728723	-0.98093	-0.98093	-0.98093	-0.98093	2.02386	-0.98093	-0.897583	3.4852	0.00652402	0.116785
P3h3	-2.23165	0.00907374	-2.23165	-2.23165	-0.559065	-2.23165	0.0608762	-2.23165	-0.891182	3.34377	0.00653369	0.116862
Lmx1a	-0.344859	-1.01144	-0.165296	-1.91217	-3.49345	-4.51463	-2.52954	-2.88836	-0.360094	3.06423	0.00654771	0.117017
Xlr4a	0.242283	-0.176269	-2.84206	1.81042	0.137288	-2.84206	-1.75892	-2.84206	-0.519649	3.1672	0.00656054	0.117042
Hapln2	-1.14334	-1.44465	-2.88388	-1.06452	-2.88388	-2.88388	0.372576	-1.39898	-0.78924	3.167	0.00656308	0.117042
Vwa5b1	-0.147375	2.31071	3.84203	3.22418	3.37949	-1.16968	4.11949	3.97205	0.0476271	3.06298	0.00656523	0.117042
Tmem270	-1.06669	-2.20057	-2.20057	0.907336	-2.20057	-2.20057	0.495538	1.10524	-0.738119	3.24008	0.00658102	0.11711
Il15	1.02404	2.08673	0	0	0	2.53742	0	2.89521	-0.868003	3.93195	0.00659174	0.11711
Tmem212	0	0	0	0	0	0	2.51789	1.68955	-0.937021	3.68979	0.0065965	0.11711
Angpt1	-2.66082	-0.176767	0.950346	-3.79298	-0.466003	-0.504125	-1.90886	-0.188182	-0.357644	3.06051	0.00660013	0.11711
Trappc10	-0.743008	-0.288095	-4.22995	0.569007	-0.0942052	-1.70097	-0.497626	-4.22995	-0.180536	3.10645	0.00660113	0.11711
Cntnap4	-0.0804263	-0.920339	-4.44135	0.748369	0.191945	1.15334	-0.43111	-4.44135	0.122613	3.10629	0.00660334	0.11711
Ccdc151	0	2.4113	0	2.2353	2.74901	0	0	0	-0.889763	3.47716	0.0066103	0.11711
Prokr2	-2.96184	-0.721694	-2.96184	-1.8707	-2.96184	-2.96184	-2.96184	-2.96184	-0.87665	3.477	0.00661195	0.11711
Usp51	-2.22381	-0.782518	-2.22381	-2.22381	0.0287697	1.0806	0.290506	-0.737989	-0.824467	3.2372	0.00661925	0.117119
Gabra4	-0.367043	-0.489833	-0.438907	0.391363	-0.837342	-3.05661	-0.600817	-7.06865	1.72628	3.05888	0.00662321	0.117119
Invs	2.56703	1.42615	1.75102	-2.18933	2.12655	2.24777	1.99062	-3.69512	0.668603	3.05736	0.00664494	0.117408
Dnah11	2.55826	1.57081	-0.980301	0.640234	2.00766	-0.980301	-0.980301	-0.980301	-0.782066	3.23405	0.00665668	0.117476
Tmem67	-0.0545186	0.926205	-4.50889	-1.69569	-1.6659	-4.50889	1.07746	-1.67693	0.0662786	3.10093	0.00667719	0.117476
Ggact	-0.204268	-1.20785	-2.84538	-0.566498	-2.84538	0.912471	-2.84538	-2.84538	-0.75502	3.23234	0.00667836	0.117476
Tgm3	2.62762	2.90476	0	2.18245	0	0	2.01206	0	-0.834105	3.33131	0.0066802	0.117476
Trim36	-0.981124	1.4326	-0.981124	-0.981124	-0.981124	-0.981124	0.428552	-0.981124	-0.942577	3.5837	0.00668087	0.117476
Flt3	-0.406064	-1.53952	0.330386	2.22731	2.02187	-1.53952	1.5207	0.0860985	-0.6427	3.10066	0.00668105	0.117476
Cyyr1	-3.14757	-1.70726	-3.14757	-0.849501	-2.12159	-3.14757	-3.14757	-0.797532	-0.808056	3.23146	0.00668953	0.117519
Wdr78	1.49806	3.20824	1.37057	1.31973	0.0334813	-3.14851	0.770162	-1.66264	0.169299	3.05391	0.00669431	0.117519
Mctp2	0	0	0	3.15356	1.02692	0	0	0	-0.891916	3.67875	0.00670282	0.117574
Obp2a	1.3863	0	1.87492	1.44458	0	2.90008	3.00269	1.62503	-0.834767	3.15528	0.00671847	0.117754
Ccdc102a	-1.37483	1.03902	-1.37483	-1.37483	-0.234474	-1.37483	-1.37483	-1.37483	-0.945346	3.74169	0.00672761	0.117761
Rrp8	-2.16654	-1.77052	-3.53661	0.615967	-1.8685	-3.53661	-0.484525	0.0457091	-0.509477	3.09716	0.00672968	0.117761
Mfsd8	0.240588	-1.20303	-2.11433	-0.172236	1.05655	-3.98018	-3.98018	-1.46221	-0.263119	3.09542	0.00675415	0.118095
Gm15446	-2.82041	-1.8852	-0.953209	0.387261	1.25521	0.84151	-0.0774147	0.600351	-0.516654	3.32296	0.00678035	0.118458
Gm6425	-2.26226	-2.26226	-2.26226	-2.26226	0.176003	-2.26226	-2.26226	0.160432	-0.875194	4.64845	0.00680767	0.118784
Zic4	0.778305	3.1118	1.62831	0.564427	0.706712	-0.872198	2.81626	1.38867	-0.643776	3.04536	0.0068183	0.118784
Kif5b	1.85525	0.0367705	-0.387685	-0.117923	1.13149	-0.956886	0.0970377	0.0778558	2.14124	3.00813	0.00681937	0.118784
BC028471	2.11987	-2.67317	-2.67317	0.0695455	0.305162	-2.67317	-2.67317	0.789072	-0.483554	3.22123	0.00682079	0.118784
Prmt9	-2.38294	-0.538126	-3.51606	0.878811	1.15707	-0.68424	1.42964	0.353519	-0.150098	3.044	0.00683821	0.118993
Cplane2	2.13838	-0.984351	0.883503	0.194961	0.351828	-2.41185	2.15526	0.345861	-0.399925	3.0436	0.00684413	0.119001
Trdmt1	-1.5381	0.594347	-0.800385	-2.0921	-1.53188	-2.67193	0.90442	-1.18812	-0.726472	3.04286	0.00685504	0.119002
Mcc	1.04783	-0.21295	-1.65923	-0.971746	-0.419758	0.798272	-3.52416	-2.04449	-0.401226	3.04285	0.00685511	0.119002
Syngap1	1.15618	-0.199114	-5.647	2.2163	1.16085	-5.647	0.726592	1.30381	1.72531	3.08705	0.00687263	0.119211
Cop1	0.939489	-0.129668	-1.73538	0.113071	-0.71524	-1.53148	-1.92661	-6.2619	1.15117	3.03951	0.00690454	0.11967
Cdkal1	-0.169126	-2.85001	-2.51332	-1.21466	-1.1357	-5.08051	-0.352083	-3.47179	-0.0499498	3.03888	0.00691382	0.119735
Hmmr	1.02526	0	0	0	0	0	2.51857	0	-0.955032	4.22031	0.00693764	0.119984
Tcp10c	-0.981107	-0.981107	-0.981107	1.57618	-0.981107	-0.981107	-0.981107	-0.981107	-0.938801	3.65356	0.00695233	0.119984
Sim1	2.67213	1.77262	0	2.84616	3.67849	0	3.67537	0	-0.692829	3.21099	0.00695491	0.119984
AW549877	-0.0612311	-1.59879	-0.0393264	0.889149	-2.00699	-3.02967	-1.02825	0.6781	-0.52501	3.29149	0.00696003	0.119984
Adamtsl5	2.65996	0	0	0	0	0	0	0	-0.945359	4.30887	0.00696133	0.119984
Nup62cl	1.09568	3.57696	-1.17402	1.98662	-0.0341954	-1.17402	1.51564	1.27293	-0.562725	3.08084	0.00696195	0.119984
Bicral	2.51483	1.02926	-3.17333	1.1084	0.3424	-5.05313	1.1061	0.829404	1.3173	3.03526	0.00696775	0.119984
Dxo	0.858088	-0.428933	-4.95996	0.00639686	-0.323976	-4.95996	-1.95631	-3.33499	0.214051	3.08013	0.00697217	0.119984
Gm5662	-0.446191	-2.25521	-1.32283	-1.95908	-3.19489	0.334868	-1.55667	-3.19489	-0.749171	5.37734	0.00697858	0.119991
Septin1	-4.72725	-2.1848	-4.72725	-2.36467	-2.94814	-4.72725	-4.72725	-4.72725	-0.616151	3.30639	0.00698356	0.119991
Gm46432	-0.967144	-2.03316	-1.10081	0.436631	-1.39223	-0.439118	-2.97243	-2.97243	-0.729597	4.23738	0.0069939	0.120074
Them7	1.02382	2.68419	0	2.362	2.69814	0	1.0896	0	-0.850053	3.20678	0.0070108	0.120194
Gm25106	2.27796	0	3.00432	0	1.7465	0	0	0	-0.876243	3.52338	0.00701544	0.120194
Osgin1	2.47994	-1.19425	1.74176	-0.271818	1.30007	-1.19425	0.703434	1.053	-0.721906	3.07701	0.0070175	0.120194
Atp11c	-2.17659	-0.772997	2.03171	1.08182	1.22105	-4.78461	-0.524867	-2.5212	0.590907	3.03133	0.0070268	0.120194
LOC118568701	-2.54951	-2.54951	-2.54951	-1.96552	-2.54951	-2.54951	-2.54951	-2.54951	-0.945262	3.6457	0.0070322	0.120194
Spg21	1.5935	-1.70292	-3.94365	1.04283	1.28285	-0.179382	1.14329	0.121368	0.25253	3.03086	0.00703393	0.120194
Zswim8	-1.85203	-1.01656	-7.58827	-1.37408	-2.85268	-1.57789	-3.65898	-0.705449	1.48468	3.02986	0.00704901	0.120357
Tex33	2.34864	0	2.57388	0	2.37802	0	0	1.60864	-0.876058	4.51778	0.00706935	0.12061
Tdrd1	0	0	0	4.20986	0	0	0	0	-0.779444	3.98645	0.00707897	0.120611
Mrgpra6	-2.86779	-0.636954	-2.86779	-1.47056	-1.19761	-0.334944	0.253392	0.388397	-0.707016	3.07253	0.00708331	0.120611
Dcx	-3.42442	-0.583573	-4.78541	0.47024	-0.575102	-1.02283	1.16808	-3.09478	0.179238	3.02743	0.00708598	0.120611
Duxbl1	1.35836	-2.54126	0.394748	-0.637101	-2.54126	-2.54126	-1.0302	-2.54126	-0.726872	3.19949	0.00710857	0.120808
Paqr5	-0.0553021	-0.247173	-1.19	1.70997	-1.19	-1.19	-1.19	0.50034	-0.8666	3.19949	0.00710861	0.120808
Abcc10	-2.19841	-3.22091	-3.22091	-1.60003	-3.22091	-0.243405	-0.709096	-1.59568	-0.787803	3.12641	0.00711736	0.120862
Ccdc137	-0.658069	1.48387	-4.36636	-1.11335	0.0734705	-1.83166	-0.319464	-0.604423	0.0476694	3.02414	0.00713618	0.12097
Zfp939	-2.84447	0.190405	-3.86101	0.491571	-3.86101	-3.86101	0.687865	-3.86101	-0.365751	3.19735	0.00713767	0.12097
Cntrl	-1.08017	-2.57612	-5.87652	-1.94137	-4.73631	-3.34035	-0.617609	-3.05724	0.135075	3.02387	0.00714035	0.12097
Gm32432	0	0	0	0	1.0275	0	2.68676	0	-0.947542	5.51882	0.00715096	0.121056
Smad5	0.671094	-0.81144	1.27104	1.69557	0.110254	-3.79637	-3.79637	0.583029	0.0663278	3.06588	0.00718183	0.121484
Zwilch	0.484994	-0.875577	-0.875577	1.24703	-0.875577	-0.875577	2.12786	0.610611	-0.858223	3.19349	0.00719023	0.121487
Kcnj3	1.61639	-1.10229	-5.59094	0.371568	0.133056	-5.59094	-1.20687	-4.10428	0.791536	3.06513	0.0071931	0.121487
Necab3	-0.45942	-1.55781	-6.43103	0.900555	-0.64447	-6.43103	0.0561786	-0.327764	1.34924	3.06366	0.00721511	0.121764
Caprin2	-3.20247	-3.20247	-1.33195	0.0370383	-2.17823	-3.20247	0.543383	-0.777859	-0.664929	3.1181	0.00723654	0.122028
Sema3f	-0.153551	-3.31442	-4.2496	-2.871	-1.58085	-4.2496	-0.640741	-4.2496	-0.514904	3.11757	0.00724423	0.122028
Calcoco2	-1.9586	-2.67043	-3.61261	-3.61261	-2.58628	-3.61261	-2.52334	-3.61261	-0.826274	5.67429	0.00725216	0.122028
Mpeg1	-1.96838	-1.50658	-3.52745	-0.887827	-0.0487563	-3.52745	-1.30284	0.614753	-0.558784	3.06062	0.00726092	0.122028
Otud3	-2.18476	-3.55364	0.503671	0.0783302	-1.30845	-0.567982	-1.27322	-3.55364	-0.569065	3.06033	0.00726533	0.122028
Prlh	0	0	2.34281	1.62519	2.95722	0	0	1.62494	-0.878529	3.28411	0.0072669	0.122028
Tbc1d2b	2.04017	0.902436	2.87826	1.25862	-0.874342	-0.874342	1.13554	-0.874342	-0.791454	3.11563	0.0072723	0.122028
N4bp3	-0.87525	1.80806	2.43816	0.361177	0.264991	-0.87525	1.1071	0.822113	-0.82837	3.05966	0.00727546	0.122028
Tead2	0	2.00187	0	2.38361	0	0	2.29206	1.48639	-0.875411	3.28171	0.0072981	0.122313
Zfp384	-3.12084	-2.29615	-2.46879	-0.805462	0.00437581	-5.78425	-3.30245	-1.86108	0.250327	3.01278	0.00731257	0.122462
Mme	1.361	2.00991	0	0.582392	0	0	0	3.47842	-0.837256	3.3265	0.00732238	0.122532
Zfp874b	2.91697	0	0	2.4066	0	0	1.0901	0	-0.883057	3.41153	0.00736036	0.123073
Nt5c1b	0	0	0	2.62485	0	0	0	0	-0.945155	3.95023	0.00739803	0.123537
Hira	-0.105963	-1.23249	-3.20817	0.236427	-1.00619	-5.5499	-1.71869	-4.06296	0.355208	3.00728	0.00739945	0.123537
Pcdh20	-2.90551	-0.769578	-2.77611	0.119727	-1.58453	-4.64315	-1.39417	-0.935376	-0.205557	3.00655	0.00741108	0.123637
Enkd1	-0.688547	-2.49922	-4.28949	1.16716	-0.611216	-2.07509	-1.54519	-1.56672	0.896632	2.9672	0.0074641	0.124426
Morrbid	1.68633	-0.872414	2.54994	1.32681	3.01783	2.42537	1.67555	-0.872414	-0.654917	3.84659	0.00752486	0.125343
Xaf1	-2.34759	-1.08588	-3.48069	-1.71576	-3.48069	-3.48069	-1.47787	1.14544	-0.579826	3.09733	0.00754348	0.125558
Gcnt2	2.67992	0	0	1.62004	0	0	1.09055	0	-0.910737	4.01648	0.00755375	0.125633
Dlx6os1	1.52693	-2.78178	-2.78178	-0.763548	1.01884	-2.78178	-2.78178	-2.78178	-0.619268	3.26172	0.00756366	0.125677
P3h4	1.49988	0.209015	-2.67641	0.627145	-0.143402	-2.67641	-1.59206	-2.67641	-0.597571	3.09572	0.0075679	0.125677
Cyp4f16	-0.94373	-1.56139	-0.849583	-1.23282	-1.05295	-5.68801	-5.68801	-2.54173	0.167976	3.04013	0.00757711	0.125708
Ndst2	-1.06334	-2.19656	-0.327702	-0.41708	0.281067	2.5293	1.65436	0.249967	-0.603222	2.99598	0.00758131	0.125708
Tcea3	-2.84995	-2.84995	-2.84995	-0.819109	-2.84995	-0.312301	-2.84995	-2.84995	-0.879623	3.39259	0.00759313	0.125806
Gm7445	2.12782	0.432296	-1.17054	-1.17054	0.50003	-1.17054	1.68082	1.27449	-0.744432	3.09353	0.00760113	0.125806
Klhl3	-2.11304	0.21955	-3.13291	1.02874	-2.10925	-3.13291	-1.23572	-3.13291	-0.621508	3.09331	0.00760449	0.125806
Cfap161	-3.26241	0.929059	-0.698524	-0.214319	-3.26241	-3.26241	-0.981096	-1.63664	-0.59629	3.09176	0.0076281	0.126101
Slc43a3	-4.51383	-4.51383	-4.51383	-0.788595	-4.51383	-1.98351	-4.51383	-4.51383	-0.599773	3.38716	0.00766121	0.126489
Zfp641	3.05504	1.68211	-1.199	0.814745	3.01156	-1.199	2.6072	0.281915	-0.498805	3.03455	0.00766565	0.126489
Ctdspl	0.737964	1.20274	4.74041	-0.578855	-0.223451	-2.17821	1.05704	-0.569394	-0.436656	2.99063	0.00766897	0.126489
n-R5s136	-1.92699	-0.16292	1.37014	1.61457	4.18486	2.39962	0.512467	1.71828	-0.260643	2.99018	0.0076764	0.126516
Zbtb40	1.42675	2.40584	-2.37475	0.255321	0.946302	0.45835	0.366995	-2.37475	-0.441413	3.03221	0.00770304	0.126859
Opn3	0	2.26762	2.34613	2.71553	1.02555	2.53496	2.53492	0	-0.786309	3.31798	0.00771693	0.12698
Zfp113	-1.04719	-1.47835	-3.50695	-1.05791	-1.83636	-0.973257	-3.50695	-3.50695	-0.745619	3.08534	0.00772672	0.12698
Dcaf17	0.502613	-2.79938	-2.79938	1.46124	-2.79938	-2.79938	0.639912	-0.358691	-0.543741	3.15527	0.00773317	0.12698
Trim62	-2.98737	-2.98737	-2.98737	0.398881	-1.02579	-2.98737	-2.98737	-2.98737	-0.770482	3.38144	0.00773369	0.12698
Unk	4.10239	1.5781	4.77235	3.35355	4.70164	-0.981027	4.15589	3.49119	0.301427	2.98578	0.00774936	0.127142
Pou6f2	2.10847	0.199278	-0.931181	-0.527905	1.90868	-2.79775	1.76448	-0.471617	-0.229408	2.98411	0.00777722	0.127432
Fgd3	0.383744	1.8115	-0.980177	-0.980177	2.13585	1.92236	1.87181	0.645148	-0.763038	3.02752	0.00777869	0.127432
Serinc2	3.14671	1.49372	-1.17395	2.02143	-0.150915	-1.17395	2.63441	-1.17395	-0.566386	3.07937	0.00781963	0.127931
Zcchc2	3.16888	2.10844	3.539	4.11084	3.35188	-0.871832	4.10395	-0.871832	-0.115356	3.02434	0.0078304	0.127931
Entpd5	1.24497	-0.901849	-0.523304	-1.19582	-0.401082	-1.5336	-4.43834	-4.43834	-0.0832101	3.02423	0.0078322	0.127931
Dkk4	-1.64122	-1.64122	-1.64122	0.173337	-0.50103	2.44547	-0.000717037	-0.155886	-0.806337	3.29122	0.00783265	0.127931
Impa2	-0.109275	-0.946321	0.681159	-2.38401	0.847525	0.446004	-2.38401	-0.775304	-0.753941	3.02246	0.00786106	0.128221
Npy2r	-2.72111	0.181422	-2.72111	-0.0332295	-0.285217	-2.72111	-0.433894	-2.72111	-0.766588	3.1466	0.00786214	0.128221
Ptger4	0	1.44205	0	1.59804	0	4.14041	0	1.48616	-0.855632	4.99659	0.00793159	0.129139
Gm32749	-2.3893	-2.3893	-0.513447	-1.46904	0.291028	-2.3893	-1.29915	-2.3893	-0.886158	3.14121	0.00794333	0.129139
Mta1	-2.71528	-1.32761	-2.55655	-0.171559	-2.30384	-7.60106	-3.02212	-2.20575	1.46623	2.97413	0.00794589	0.129139
Camsap3	-1.02122	-2.18061	-1.89586	-2.63087	-1.38641	-4.17564	-3.2125	-5.10538	0.545261	2.93858	0.00795083	0.129139
H2-Q5	-0.802998	2.31274	0.566597	-0.716558	-0.91276	1.04753	1.40008	0.207057	-0.608051	2.95432	0.00795581	0.129139
Sgpp2	-2.03077	0.524241	-3.04946	0.878597	1.01541	-3.04946	-0.546889	-3.04946	-0.538956	3.07021	0.00796449	0.129139
Ranbp17	0	1.62049	2.93581	2.23518	1.1403	0	0	0	-0.88663	3.2325	0.00796999	0.129139
Kifc3	1.97914	-0.396984	-2.81059	2.30675	0.21036	-4.52641	0.43485	0.0880576	2.84156	2.93698	0.00797891	0.129139
Prrg2	-0.77631	-0.366138	-3.42594	0.873283	0.112362	-3.42594	-3.42594	-1.06141	-0.494862	3.06927	0.0079795	0.129139
Pwwp2a	-0.752292	1.02935	0.578304	-2.46088	-0.703915	-6.81111	-0.823958	-2.53068	1.62255	2.97216	0.00797958	0.129139
Tapbpl	-3.21998	-3.21998	-0.28384	0.509646	-0.453715	-0.312199	0.438446	-0.0564417	-0.510234	3.01504	0.00798352	0.129139
Ttf1	-1.21354	-1.54009	0.773071	-0.464056	-3.1443	-3.1443	-3.1443	-1.66062	-0.715475	3.06797	0.0080002	0.129313
Gm31288	0	2.41337	0	0.956491	0	0	0	1.68853	-0.935318	3.45975	0.0080262	0.129508
Il13ra2	0	0	0	2.55777	0	0	0	0	-0.948716	3.88208	0.00804201	0.129508
Spata9	0	0	0	2.55777	0	0	0	0	-0.948716	3.88208	0.00804201	0.129508
Wasf2	-0.923555	-2.44916	-5.11967	-0.667774	-0.875311	-5.11967	-1.12999	-5.11967	-0.117419	3.06522	0.00804437	0.129508
LOC118567768	0	1.44358	0	1.82297	1.14032	0	2.70395	0	-0.911814	3.80525	0.00804571	0.129508
Kctd21	-0.813842	-2.427	-3.85947	-1.31822	-1.09157	-3.85947	-3.85947	-0.321803	-0.586192	3.06501	0.00804786	0.129508
Map3k9	-1.79417	-1.61729	-0.195393	0.400921	-4.24964	-1.26162	0.250353	-2.00466	-0.225509	2.96739	0.00806191	0.129638
Hmx2	4.41727	0.938371	0	2.39587	3.54019	0	1.0859	0	-0.67337	3.13201	0.00808405	0.129898
R74862	1.38556	2.4103	0	1.77789	3.12077	0	0	0	-0.865801	3.22403	0.00809187	0.129928
Naglu	0.436486	-2.90829	-2.90829	-0.765	0.387584	-0.376097	-2.90829	-0.477415	-0.66774	3.0608	0.00811599	0.130126
Mapk12	0.196468	-0.660204	-1.54629	0.138616	1.00044	-3.41856	3.61933	-0.512453	0.009955	2.96419	0.00811755	0.130126
Peak1	0.31306	0.833474	-1.34785	-0.415734	-3.51865	-4.65882	-4.65882	-0.19296	0.0810862	3.00645	0.00812764	0.130126
Tssk3	2.63059	0.944057	0	0.919768	0	0	0	0	-0.933026	3.37885	0.00812804	0.130126
Tspan11	-3.42601	-1.39846	-3.42601	-1.09471	-0.782937	-3.42601	-0.429595	-1.81729	-0.720759	3.05528	0.00820624	0.131282
Fndc3b	-1.08982	-1.25798	-6.06488	-0.103946	0.594916	-6.06488	-4.16614	-0.843175	0.794284	3.00125	0.00821614	0.131332
Pfkfb1	-1.3033	-1.3033	-1.3033	-1.3033	0.877757	-1.3033	1.96307	-1.3033	-0.861188	3.34386	0.00822806	0.131332
Serpina3n	-0.159395	-1.08455	-3.85971	-0.423022	0.667739	-3.85971	0.913733	-2.37974	-0.282131	3.00043	0.00823017	0.131332
Asb4	-0.0664132	1.02267	1.15521	2.57342	3.14652	-1.19916	2.00056	2.19497	-0.492712	2.9576	0.00823345	0.131332
Sfxn2	-0.489775	-2.2313	-2.2313	-2.2313	-1.09103	0.306059	0.471069	-2.2313	-0.86486	3.12049	0.00826392	0.131648
Arhgef37	0	0	2.34276	1.7784	1.02681	0	2.70287	1.60864	-0.88045	3.11977	0.00827522	0.131648
Boc	-2.52429	-2.52429	0.411609	-0.56736	0.297034	-2.52429	-2.52429	-1.03889	-0.808399	3.99617	0.00827566	0.131648
Rb1	0.317124	-3.5557	-1.68979	-0.155786	0.544429	-3.5557	-0.37856	-1.92962	-0.45358	2.99769	0.0082774	0.131648
Atp7a	0.753955	-0.226733	0.086768	-2.25866	-2.25866	-2.25866	0.0462125	-2.25866	-0.800268	3.11812	0.00830139	0.131933
Iqcd	1.50324	-0.200206	0.707094	-0.788953	-2.22889	-2.22889	-0.590716	-2.22889	-0.747552	3.04807	0.00832577	0.132225
Agrp	-2.37071	-1.00924	-1.54703	-0.231242	-0.515638	-4.10825	-2.47623	-4.10825	-0.495357	2.99423	0.00833723	0.132252
Pm20d1	-2.50095	-1.92568	-1.79728	-2.3368	-1.00413	-4.15006	-0.192906	-4.15006	-0.56419	2.99409	0.0083396	0.132252
Neto1	-1.04714	-1.63879	-5.37819	-2.09006	2.07479	-5.37819	-1.84942	-0.363332	0.439321	2.9934	0.00835167	0.132347
Trp63	0	2.2445	0	0	0	0	0	0	-0.973949	4.22894	0.00837316	0.132495
Vmn2r47	0	2.2445	0	0	0	0	0	0	-0.973949	4.22894	0.00837316	0.132495
Mia2	0.333793	-1.04996	-1.85427	-0.642626	0.0925732	-6.55462	-0.173911	-6.55462	1.27438	2.99039	0.0084042	0.132856
2200002J24Rik	0	0	0	2.03221	2.68108	0	1.41005	0	-0.914344	3.33076	0.00840814	0.132856
Stx17	1.57097	0.130109	-3.32226	1.74743	0.0682338	-3.32226	1.09386	-1.71351	-0.102661	2.98856	0.00843639	0.133137
Trim25	0.0770604	-0.998665	0.281566	-0.00446889	-0.484679	2.82541	-0.290054	-0.692923	-0.360538	2.91164	0.00843812	0.133137
Agbl4	-0.447356	-1.36662	0.725485	-0.372422	-2.57768	-4.95302	-1.51902	-4.95302	0.0264199	2.98769	0.00845165	0.133254
Vav2	2.70664	0.939086	2.7363	2.55357	0	0	3.91365	0	-0.719962	3.10547	0.0085044	0.1339
Klhl4	-1.39878	-0.930338	-2.96543	-2.96543	-1.38234	-2.96543	-1.55474	-2.96543	-0.859543	3.1054	0.00850563	0.1339
Zfp944	-4.4928	-0.151572	-4.4928	-1.42103	-0.130638	-4.4928	-4.4928	-4.4928	-0.409551	3.1959	0.008511	0.1339
Gm8182	-1.70027	-3.25703	-3.25703	-1.64332	-0.732469	-3.25703	1.16035	-1.11366	-0.611381	3.03662	0.00851921	0.133932
Vip	-2.64239	-1.45198	-6.6426	-1.56335	-6.6426	-6.6426	-0.921695	-1.59718	0.623184	3.03594	0.00853087	0.134019
Nfatc3	0.979994	2.75611	-0.871823	1.85991	3.13646	-0.871823	2.4229	0.610611	-0.622451	2.98277	0.00853873	0.134046
Olfr91	-0.568537	-0.164678	-3.38725	-0.409655	-1.80767	-3.38725	-3.38725	-2.37053	-0.685501	3.03453	0.00855499	0.134204
Slc35d3	-0.015775	-0.906789	-2.93692	-2.93692	-1.15484	-0.402384	-2.93692	-2.93692	-0.774558	3.10163	0.00856714	0.134298
Itprid2	1.46611	-0.291553	-4.65846	-0.138122	-0.103718	-1.75902	-3.24789	-1.17991	0.222429	2.93816	0.00858505	0.134443
Ankrd33b	-1.70256	0.1218	-3.6435	-1.65311	-1.97415	-0.812218	-1.16783	-3.6435	-0.629325	2.97966	0.00859423	0.134443
Gmip	-1.30355	-1.30355	-1.30355	1.5426	1.18198	-1.30355	-1.30355	0.182591	-0.854359	3.19044	0.00859482	0.134443
Hdac9	-5.72808	0.676286	-1.40765	0.0186376	-0.415423	-3.18993	-1.15662	-0.47189	0.714673	2.93659	0.008614	0.134508
Sell	-0.876349	1.76102	-0.876349	-0.876349	-0.876349	1.66218	-0.876349	-0.876349	-0.921119	5.0523	0.0086166	0.134508
Zfp606	2.58562	1.91485	-0.872659	2.83181	1.30612	-0.872659	0.763914	-0.872659	-0.676044	3.0309	0.00861748	0.134508
Adamtsl2	1.05542	-0.778057	-1.72037	0.404618	-1.72037	-1.72037	0.981086	-1.72037	-0.834812	3.15422	0.00863042	0.134614
Cgnl1	2.26108	3.25788	-1.17418	1.43105	1.80602	-1.17418	-0.0905714	1.71205	-0.553015	2.9761	0.00865835	0.134642
Gm41393	-1.18946	1.45395	-1.18946	0.942397	-1.18946	-1.18946	-1.18946	-1.18946	-0.893664	3.34779	0.00866295	0.134642
Kirrel2	-3.10598	-0.696488	-3.10598	-1.39947	-2.07948	-3.10598	-3.10598	-3.10598	-0.845225	3.1859	0.00866539	0.134642
Igf2	0.5698	-2.17064	0.153577	-2.15146	-1.13257	-2.86815	-1.79709	-3.7973	0.244756	2.89948	0.00866794	0.134642
Ap5b1	2.96919	2.23322	0	1.22443	3.06599	0	2.2869	2.85937	-0.759308	3.02792	0.00866922	0.134642
Tnks1bp1	0.974209	0.9638	-4.37252	2.36405	1.87337	-4.37252	-0.0246102	0.0157928	0.779752	2.97549	0.00866929	0.134642
Mtg2	1.88082	0.777338	-2.71473	1.70746	0.106236	-0.932586	-3.0858	-3.10423	0.654448	2.89866	0.00868361	0.134739
Mdc1	-2.43261	-1.48992	-2.43261	-1.4776	0.598564	-2.43261	-2.43261	-0.946426	-0.858203	3.09409	0.0086915	0.134739
Slc26a11	-2.41742	0.484984	-3.43657	0.181019	-0.310171	-3.43657	-3.43657	-1.74222	-0.575622	3.02637	0.00869621	0.134739
Trhr2	1.87026	0.0461383	-1.72754	0.830588	0.947037	0.805704	-1.72754	-1.72754	-0.726765	3.02534	0.00871421	0.134739
Ptgfrn	-1.04991	-0.5162	-1.39936	-0.361583	-0.545358	-1.85921	-4.385	-2.9056	-0.31949	2.93119	0.00871469	0.134739
Fxyd5	-2.81205	-2.81205	-2.81205	-0.430342	-2.81205	-2.81205	-2.81205	-2.81205	-0.887782	3.49885	0.00871954	0.134739
Fpgs	-3.29053	-0.675571	0.329077	-1.75351	0.524178	-4.42369	-3.009	0.172785	-0.143759	2.93023	0.00873282	0.134739
Myo7a	0.477663	-3.02616	-3.02616	2.84142	1.08633	0.504896	1.19717	2.39875	0.157634	2.97162	0.00873953	0.134739
Aspg	-2.47105	-0.196481	0.529197	0.390725	-2.47105	-2.47105	-0.962055	-2.47105	-0.788254	3.09111	0.00874127	0.134739
Rgl2	-2.7226	-3.74337	-1.39397	-1.56456	-1.43185	-3.74337	-3.74337	-0.442481	-0.674676	3.02344	0.00874739	0.134739
Tfpi2	-0.302966	-3.89263	-3.89263	-1.82767	-1.582	-3.89263	-3.89263	-1.52819	-0.637179	3.09064	0.00874912	0.134739
LOC102638047	-2.26259	-2.26259	-2.26259	-0.34831	-2.26259	-2.26259	-2.26259	-2.26259	-0.935323	3.49652	0.00874958	0.134739
Prkg1	2.09256	0.312588	2.44449	1.25646	-0.684803	-1.70759	2.18094	-0.0988126	-0.538897	2.92814	0.00877219	0.134914
Ncf1	-3.15982	-1.7205	-3.15982	-0.976303	-1.19757	-0.182985	-1.74792	-3.15982	-0.790885	3.02197	0.00877332	0.134914
Cd274	3.67114	1.77939	0	0	0	0	1.50697	0	-0.83307	3.30387	0.00879081	0.135038
Rev1	0.0985829	0.986698	-6.17789	-0.133699	-0.358007	-3.63688	-0.0124677	-4.29532	1.22395	2.9269	0.00879551	0.135038
Cep57l1	-3.55178	-1.60633	-5.42606	-0.550952	-1.79884	-5.42606	-0.443899	-2.18167	0.0457006	2.96832	0.00879999	0.135038
Ano5	0	0	0	2.48631	0	0	0	0	-0.952292	3.80752	0.00881763	0.135059
Tifab	0	0	0	2.13971	0	2.89829	0	0	-0.928602	3.49051	0.0088276	0.135059
Fen1	1.07225	1.80927	-3.30658	1.93623	1.84305	-3.30658	1.76813	-1.82076	0.163105	2.96613	0.00884029	0.135059
Pax2	0	0	0	2.23811	1.14037	0	0	0	-0.954036	3.48952	0.00884043	0.135059
Pms2	0.935707	-1.4532	-4.34162	-1.44529	-3.46878	-3.6796	-0.20583	0.168254	1.08333	2.89035	0.0088444	0.135059
Eml1	-0.601522	-2.13579	-4.46449	-0.498472	-0.964553	-0.741819	-1.55091	-4.85394	0.74221	2.89034	0.00884469	0.135059
Cabp1	-2.43435	0.857147	-2.43435	0.112509	1.4468	-2.43435	-2.43435	-0.73458	-0.685317	3.08483	0.00884682	0.135059
Sstr5	2.6308	0	0	1.23102	0	0	0	0	-0.938893	3.48852	0.00885345	0.135059
Prc1	-3.56248	1.87917	0.845804	1.07295	-1.89382	-3.56248	0.481751	-3.56248	-0.157509	3.01724	0.00885705	0.135059
Atg2b	-0.527492	-1.4321	-1.51184	-0.610543	-0.376933	-5.08553	-1.05366	-5.08553	0.0146707	2.96479	0.0088649	0.135084
3830406C13Rik	-1.20623	-0.289573	-0.0450529	-0.45934	-0.956074	-6.98006	-0.382734	-0.496058	4.00181	2.88769	0.00889651	0.135472
Zfp341	1.89443	-1.19435	-1.19435	1.20217	1.11786	-1.19435	2.67766	-1.19435	-0.717102	3.08064	0.0089181	0.135632
Hpgds	0.904651	-3.20365	0.333523	1.15841	0.00189367	-3.20365	-0.866612	-1.50033	-0.400952	2.96123	0.008931	0.135632
Sinhcaf	2.431	1.54454	-0.11093	1.25685	-0.839602	-1.97946	-1.97946	-1.97946	-0.588623	3.01296	0.00893334	0.135632
Nabp1	-2.30737	-3.44033	-1.57262	-0.771953	0.55824	-3.44033	0.0461024	0.0467538	-0.547164	2.9609	0.00893713	0.135632
Tmem45a	0.921745	-0.174683	-1.07073	-0.845114	-0.724503	2.59532	-0.188429	-1.55547	0.326488	2.88558	0.00893813	0.135632
Phf21b	3.61333	0	0	0	0	0	0	1.69719	-0.845374	3.48105	0.00895174	0.135744
Mthfd2l	0.547743	1.18653	-0.378012	2.61917	1.18477	3.23256	1.82871	-2.72461	0.0411468	2.91826	0.00896062	0.135784
Ccdc92b	1.16624	0.595633	-2.37343	2.3005	0.292083	-2.37343	1.96961	-2.37343	-0.388737	3.00985	0.00898928	0.136124
Ptprd	-2.05951	-2.1027	-2.71283	-0.436429	-2.22913	-7.80137	-1.21496	-2.37779	4.16292	2.88233	0.00900247	0.136229
Kctd15	-0.417962	-1.09497	-3.75641	-0.350229	0.159559	1.10004	-3.75641	-3.75641	-0.424104	3.00836	0.00901624	0.136256
Gm7361	0	0	0	2.03435	0	0	1.09079	0	-0.963157	3.47616	0.00901669	0.136256
Gm5385	0.153847	1.65502	2.45413	-0.399802	0.159962	-0.980129	-0.980129	2.53783	-0.754526	3.9905	0.00903929	0.136503
Pm20d2	1.7981	-0.150282	-1.18085	0.575034	-0.804074	-0.519511	-0.76999	-3.04623	-0.426309	2.91189	0.00908443	0.136977
Zfp455	0.647789	-1.9385	-3.3678	0.0827017	-0.936793	-3.3678	-1.0903	0.597944	-0.467767	2.95304	0.00908492	0.136977
Zfp518a	0.983588	-0.111699	-3.24789	-0.979448	1.14518	0.0430755	-3.24789	-1.00336	-0.442195	2.9528	0.00908954	0.136977
Scmh1	0.619039	-0.721665	-3.58092	0.498718	0.392058	-5.45719	-0.431926	-3.76729	0.670151	2.91044	0.00911283	0.137233
Slc12a7	1.13488	0	0	0.583407	2.84736	0	1.09053	1.60862	-0.909257	3.56983	0.00912107	0.137263
C630043F03Rik	0	0	3.00621	0	0	0	1.64387	1.4871	-0.931366	5.05424	0.0091347	0.137341
Sec22c	-1.64608	-1.04295	-4.10117	-0.0406121	-0.2288	-4.10117	-2.10137	-4.10117	-0.46625	3.00118	0.00914723	0.137341
Dclre1c	-2.10067	-4.30066	-5.23472	-1.92808	-1.59071	-2.24558	-2.01014	-2.0313	-0.258688	2.90858	0.00914933	0.137341
Slc25a51	1.43638	0.0874941	2.01	0.110424	3.10759	0.493198	1.33281	1.01904	2.02036	2.87491	0.00915142	0.137341
Ankmy1	0	0	0	1.44788	2.74988	0	0	0	-0.939546	3.46495	0.00916742	0.137486
Stat5a	-3.21973	1.17086	-1.35339	-0.423956	0.261555	0.781079	-0.71914	-0.974883	-0.473573	2.90537	0.00921277	0.137818
Brs3	1.13482	0	0	2.30709	1.02696	2.89896	0	0	-0.896185	3.33302	0.0092144	0.137818
Myo1b	0.0503037	-3.15464	-1.93089	-0.167829	-1.10955	-2.02289	-1.69361	-4.92704	-0.0585642	2.90527	0.00921464	0.137818
Htr3a	1.42112	-0.980675	2.89382	0.796054	-0.980675	-0.980675	-0.980675	0.505202	-0.829948	3.30371	0.00921481	0.137818
Gpr39	1.02425	0	1.87582	0.955578	2.93328	0	2.23552	0	-0.884344	4.73796	0.00922462	0.13787
Tesk2	0.503627	-1.7061	2.18293	1.05809	-1.7061	1.12431	0.191567	-0.0806438	-0.717145	2.94533	0.0092322	0.137889
Kcnip2	-2.84494	-0.299859	-2.84494	0.742334	-1.70496	-2.84494	0.917378	-1.36187	-0.656986	2.9954	0.00925398	0.13812
Rps6ka6	2.51489	1.78307	-2.20093	1.92181	1.01816	-2.20093	-2.20093	-2.20093	-0.370225	3.06039	0.00927067	0.138274
Secisbp2	-2.3412	-2.46381	-4.57001	-0.655429	-2.89124	-4.15685	-1.6812	-2.23945	0.900517	2.86864	0.00927896	0.138303
Gsg1l	-0.085116	-4.21394	-4.21394	-0.630541	-1.07189	-1.30454	-1.93759	-2.73395	-0.430039	2.93879	0.00935909	0.139403
Snx29	-0.893699	-4.08589	-4.08589	0.374031	-1.41979	-1.55939	-0.421324	-4.08589	-0.414777	2.98798	0.00939308	0.139813
Ptprr	-0.191493	-1.78924	-4.75881	-1.48282	-1.53895	-1.46897	-3.67756	-2.49993	-0.302944	2.89558	0.00940894	0.139954
Pkmyt1	-0.533429	-2.68602	-2.68602	-2.10354	-1.54576	-2.68602	0.31696	-2.68602	-0.843902	3.05158	0.00942856	0.140061
Gm38581	0	0	0	2.38253	0	0	0	1.68971	-0.924113	3.44565	0.00943335	0.140061
Lipe	-1.56326	0.500275	0.576757	1.38838	1.13534	-2.96198	-1.06565	-2.96198	-0.445648	2.93469	0.00943949	0.140061
Asap1	-1.42524	-3.04045	-5.49155	-0.447274	-2.00854	-2.93045	-0.784242	0.0301244	2.85992	2.86076	0.00944183	0.140061
Cbln2	0.254621	-0.444226	-3.15179	0.657648	-1.16183	-1.56003	-1.89251	-2.72324	1.75669	2.86025	0.00945252	0.140125
Smc2	-0.967751	-0.905224	-4.42791	0.537407	-0.0519761	0.114588	0.442622	-4.42791	-0.0119062	2.93309	0.00947102	0.140304
Asb1	2.95864	0.314135	0.32819	0.74834	1.4861	0.0667807	0.0995203	0.0881997	0.786291	2.85669	0.00952713	0.14098
Afg1l	-2.08785	-3.93947	-1.58915	-0.599759	-2.91551	-3.93947	-3.93947	-1.69294	-0.643754	2.9808	0.0095296	0.14098
Cdiptos	0.41316	-1.36482	-3.13033	2.14795	0.767211	-0.222205	0.912387	-1.64952	-0.220185	2.88821	0.00955941	0.141325
Gm36722	0	3.118	0	0.954861	2.54035	0	1.08962	1.6905	-0.8511	4.49603	0.00957238	0.141421
Mmp28	0	0	0	2.70831	0	2.97479	0	2.44358	-0.835834	3.25079	0.00960057	0.141742
Rxfp1	-3.06122	-1.46602	-3.06122	-1.99427	-3.06122	-3.06122	-1.41904	-3.06122	-0.860488	3.1277	0.00962294	0.141976
Uba1y	0	1.44006	3.3052	2.54478	1.58195	0	1.41158	2.51099	-0.804056	2.97437	0.00965352	0.14223
Map7d3	1.4131	-1.26169	-2.20228	0.413937	-1.17679	-2.20228	-1.11442	-2.20228	-0.782608	2.97424	0.0096561	0.14223
Ankzf1	0.044749	-4.21883	-0.921659	0.273081	-0.0240249	-4.21883	-3.13676	-1.33478	-0.25983	2.9234	0.00966458	0.14223
Gm2056	0.399938	0.39885	-2.69097	-2.11079	-0.655709	-2.69097	-0.707859	-2.69097	-0.746555	4.05045	0.00966622	0.14223
Acr	-1.1919	-1.1919	-1.1919	1.7135	2.56325	-1.1919	-1.1919	-1.1919	-0.799689	3.24508	0.00969231	0.142517
Lpp	-0.0429447	-2.24955	-5.14551	0.0804615	-0.68972	-5.14551	-2.99372	-5.14551	0.0580763	2.97146	0.00971013	0.142683
Zfp790	-0.769716	-0.554447	-4.31166	-1.37828	-0.719873	-4.31166	-3.22927	-4.31166	-0.472451	2.97093	0.00972056	0.142714
Zfp740	1.934	-0.693173	1.11736	1.35141	0.972724	-1.31694	0.752569	-3.85477	0.248783	2.87993	0.00973133	0.142714
Kctd6	-0.081313	-1.41855	0.363667	-2.25999	-1.12543	-5.01382	-2.50503	-2.7666	-0.0341143	2.87964	0.00973742	0.142714
Sema3a	-1.5423	-1.5423	-1.5423	-0.958661	1.37216	-1.5423	-1.5423	-1.5423	-0.923816	4.27325	0.00973838	0.142714
Ctso	-2.69672	-2.69672	-2.69672	-0.87557	-2.69672	0.203466	-2.69672	-0.332441	-0.828415	3.69215	0.00975142	0.142721
Fan1	0.754397	-0.718115	-3.35808	-0.665825	-2.33483	-3.35808	-1.7241	-1.11222	-0.586897	3.0685	0.00975374	0.142721
Gramd1a	-0.143902	-1.59862	1.07223	-0.646818	-0.36165	-6.02033	1.00424	-6.02033	1.09638	2.91823	0.00976945	0.142721
Fam135a	-1.74533	-1.81053	-6.88965	-1.57872	-1.99858	-6.88965	-1.02864	-4.46108	0.76131	2.91806	0.00977292	0.142721
Fbxl19	0.913655	-0.98659	-3.21975	1.84483	1.26376	-3.21975	2.33897	0.377227	0.0117452	2.91743	0.00978586	0.142721
Zfp334	-3.47138	-0.403311	-3.47138	-0.388974	0.488767	-3.47138	-3.47138	-3.47138	-0.652417	3.11837	0.00978646	0.142721
Neurod2	-2.84924	-1.40764	-2.84924	-2.84924	-1.82281	-2.84924	-2.84924	0.183859	-0.837598	3.11806	0.00979196	0.142721
Acad10	-1.84069	-3.01994	-4.63831	-0.170939	-1.51574	-4.63831	-4.63831	-3.02949	-0.394494	2.96728	0.00979221	0.142721
Nek3	-0.0670787	0.152825	-2.74115	-0.786581	-2.74115	-2.74115	0.382059	-2.74115	-0.757705	3.03154	0.00979775	0.142721
Xrra1	-3.54249	0.32689	-3.54249	-0.820332	-3.54249	-3.54249	-2.12899	-2.05926	-0.671487	3.03001	0.00982663	0.143047
Ckap2l	1.02455	0	0	0	0	0	0	3.19367	-0.90655	3.52431	0.00985112	0.143176
Tmem198b	-3.42806	-0.453219	-1.07413	1.16401	-2.40549	-3.42806	-1.64343	-1.72606	-0.511023	2.91411	0.00985391	0.143176
Mov10	-4.2593	-0.271054	-2.39383	-1.10055	-1.15408	0.0641346	-1.92295	-4.2593	-0.43065	2.91405	0.00985523	0.143176
Foxn4	1.13502	2.03816	0	2.03325	0	0	0	0	-0.938811	3.23418	0.0098697	0.143291
Folr1	1.43347	-0.847115	-2.20741	1.71404	-3.05668	-1.54545	2.34161	1.15794	0.53927	2.83892	0.00990879	0.143763
Ttc7	0.260383	2.42128	-0.873581	1.3065	1.99146	-0.873581	2.41498	-0.873581	-0.752513	2.96001	0.00993638	0.144068
Prox1	-0.896977	0.0289253	-5.30579	0.55724	-0.287968	-0.754175	-0.193031	-5.30579	0.470147	2.90895	0.00996075	0.144325
Topbp1	-0.28449	-0.200122	-0.56248	-2.43619	0.552788	0.0993326	-2.43619	-0.951017	-0.800092	2.9078	0.00998463	0.144575
Sbk3	1.8495	1.59339	0	0	2.68076	0	0	0	-0.902596	3.22635	0.00999945	0.144694
Wdhd1	1.23473	1.9212	-0.980833	1.25381	-0.980833	-0.980833	-0.980833	-0.980833	-0.873097	3.10602	0.0100071	0.144709
Mapkap1	1.50244	-1.6099	-1.0895	-1.54402	1.99723	-2.46296	-2.01891	-0.92282	2.67026	2.83328	0.010033	0.144818
Gm35835	1.02531	0	0	2.14107	0	0	0	0	-0.958434	3.40393	0.0100368	0.144818
Gpr183	-0.876416	1.53651	-0.876416	0.903683	-0.876416	-0.876416	0.767318	-0.876416	-0.926084	3.15877	0.0100383	0.144818
Slc25a45	2.21736	2.03808	0	0	1.14035	0	0	0	-0.936933	3.67546	0.0100434	0.144818
Rhod	2.75519	0.942197	1.8748	2.07823	2.99061	0	0	0	-0.827601	3.01809	0.010054	0.144818
Pbx4	1.13396	3.22591	0	2.39726	1.02504	0	2.85707	3.143	-0.752355	2.95411	0.0100549	0.144818
D830024N08Rik	-2.67653	-2.67653	-2.67653	-2.67653	-1.6499	-2.67653	-2.67653	-2.67653	-0.932261	3.4023	0.0100611	0.144818
Ttpa	2.2057	0.93856	3.30613	2.27667	3.28303	0	3.5993	2.26122	-0.687244	2.9033	0.010079	0.144878
Dnajc25	-3.33247	-1.30296	-3.33247	-3.33247	-0.997845	-0.354219	-1.32387	-3.33247	-0.763699	3.01652	0.0100844	0.144878
Gm16010	0	1.44335	0	1.64453	2.9577	0	0	0	-0.903747	3.26382	0.0100852	0.144878
Ddn	-2.46646	-0.353678	-3.48778	-1.65244	-1.23885	-3.48778	-2.4012	-1.87906	-0.722805	2.91462	0.0101362	0.145375
Kif4	2.6298	0	0	0.920025	0	0	1.64331	1.4868	-0.909092	3.09874	0.0101398	0.145375
Lrch3	-1.07186	-1.02914	-6.0294	-1.80474	-2.65451	-6.0294	-0.829898	-6.0294	0.285805	2.94961	0.0101463	0.145375
Myb	-1.17128	1.46332	-1.17128	2.19626	0.40854	-1.17128	1.79686	1.48896	-0.703803	2.94942	0.0101502	0.145375
Etv1	0.925004	-2.0886	-6.50324	0.684458	-0.163181	-1.41313	-1.23405	-2.31619	1.45333	2.86023	0.0101531	0.145375
Nxpe2	0	0	0	1.78095	0	0	2.23085	0	-0.947044	3.81571	0.0101599	0.145376
1300002E11Rik	-0.866405	0.360463	-2.22961	-2.22961	-2.22961	0.67231	0.770696	-0.620926	-0.782754	2.94764	0.0101868	0.145665
Cdh12	2.04194	2.03773	-3.00381	2.70765	2.75985	-3.00381	1.78897	-3.00381	0.340243	2.94533	0.0102342	0.145985
Trp53inp1	-0.0363644	1.47131	3.24567	0.337179	-0.0302459	-1.17034	0.339958	-1.17034	-0.753854	3.04263	0.0102377	0.145985
Mpl	-1.16766	-1.16766	-1.16766	2.27535	-1.16766	-1.16766	-1.16766	-1.16766	-0.85139	3.38992	0.0102486	0.145985
Tpcn2	0	0.943733	0	1.85532	2.68115	0	0	0	-0.916556	3.92236	0.0102514	0.145985
Ccdc150	-2.68898	-2.68898	-2.68898	-2.68898	-2.68898	-2.68898	-2.68898	-2.68898	-0.94172	3.68682	0.0102524	0.145985
Pabpc4l	-2.68898	-2.68898	-2.68898	-2.68898	-2.68898	-2.68898	-2.68898	-2.68898	-0.94172	3.68682	0.0102524	0.145985
Tab1	-2.07524	-1.06991	-3.09602	-0.112183	-0.661551	0.984589	-3.09602	-1.47049	-0.675994	2.89497	0.0102559	0.145985
Bbc3	-0.601312	2.14352	-1.62116	1.4593	2.19693	-1.62116	1.80671	-1.62116	-0.62007	2.94379	0.0102659	0.146027
Disp3	0.816705	-0.867382	-4.20711	-1.13714	-1.23227	-4.20711	-1.52381	-4.20711	-0.331009	2.94348	0.0102723	0.146027
Abcc4	1.13493	0	0	2.08755	0	0	2.29343	0	-0.919445	3.30834	0.0102956	0.146264
Mecom	1.25937	0.201697	0.147433	0.408976	-2.20053	-2.20053	-2.20053	-2.20053	-0.736723	3.00428	0.0103241	0.146573
Poli	-2.8888	-2.10542	-6.62645	-0.607547	-1.91832	-6.62645	-1.52306	-1.45293	0.691071	2.89052	0.0103516	0.146815
Cd55	0	1.6354	0	2.86349	2.17834	0	3.57585	4.0896	-0.638696	3.00275	0.0103546	0.146815
Snapc4	-1.00045	-3.67129	-3.33748	-0.178073	-1.51655	-3.14302	-1.06138	-5.68049	0.222085	2.85024	0.0103741	0.14694
Slc14a1	2.76879	3.18895	0	3.15373	1.13991	0	3.71107	3.05607	-0.619639	2.93845	0.0103769	0.14694
Otulinl	0.47838	-2.43548	-2.43548	-1.21051	0.384319	0.0989904	0.262188	-2.43548	-0.772432	2.93765	0.0103937	0.147082
Pla2g5	-0.0936493	-0.742065	-1.93876	-1.60956	-3.80817	-3.80817	-3.80817	-2.32569	-0.624885	2.93511	0.0104469	0.147713
Pik3cg	0	0	0	0.92029	0	0	0	3.47861	-0.88273	3.37675	0.0104518	0.147713
Htr4	-1.13548	0.466147	-3.34441	-0.971334	-2.32004	-3.34441	-3.34441	-1.86107	-0.68296	2.93366	0.0104774	0.147894
Pstpip1	1.03733	-0.233092	1.32691	1.33174	3.02903	1.36084	0.241831	-1.17158	-0.682346	2.8456	0.0104782	0.147894
Ap5z1	0.398821	0.0172051	-3.5535	-0.195337	-3.5535	-3.5535	0.386742	-3.5535	-0.475086	2.9962	0.0104856	0.147904
Zfp346	1.53613	-0.60294	-2.62129	0.562265	1.7213	-2.62129	-1.53867	0.102775	-0.48511	2.88393	0.0104951	0.147942
Calcr	-1.54208	-0.654371	-2.67507	1.35114	0.972531	-2.67507	-1.1595	0.868681	-0.554167	2.88343	0.0105062	0.148002
Gm24463	-3.00582	-3.00582	0.869682	-0.872949	-3.00582	-3.00582	-0.996002	-3.00582	-0.790246	3.07737	0.0105394	0.148375
Dbf4	0	0	0	1.23693	0	0	2.5183	0	-0.94801	3.94126	0.010551	0.148441
Tfeb	0	1.44164	0	2.90586	0	2.9747	2.2294	0	-0.839044	3.16785	0.0105796	0.148573
Fbxo31	-2.15031	-1.45847	-4.09178	-1.41403	-0.166977	-4.09178	-4.09178	-4.09178	-0.590002	2.99151	0.0105807	0.148573
Tmem104	1.85014	0	0	2.85095	2.51226	0	2.28996	0	-0.813353	3.07496	0.0105855	0.148573
Ripk2	0.080891	-2.62271	-2.62271	0.784965	1.76266	-2.62271	0.721349	-2.62271	-0.568366	2.99117	0.0105875	0.148573
Gm8241	0.163707	-0.929964	1.20313	-0.12076	-0.308363	-3.70263	-2.07356	-3.70263	-0.363587	2.87891	0.0106059	0.148732
Agrn	-0.78421	-1.03971	-1.45128	-2.10227	-0.46018	1.4506	-0.234107	-6.29718	1.14492	2.83969	0.0106125	0.148732
Cd22	-3.14001	-3.14001	-3.14001	-3.14001	-3.14001	-3.14001	-3.14001	-3.14001	-0.909587	3.65835	0.010627	0.148758
Tmem74b	-1.70521	-1.84562	-4.62186	-2.75594	-1.95483	0.54937	0.0173476	-2.25731	-0.261814	2.8389	0.0106306	0.148758
Clic5	1.5863	1.52936	-0.873534	2.24848	2.42468	-0.873534	-0.873534	0.735172	-0.749594	2.92618	0.0106364	0.148758
Larp1b	-2.51859	-1.46204	-2.10493	-2.05718	-0.880819	-3.36584	-0.309496	2.39268	0.861164	2.80663	0.0106416	0.148758
C5ar1	0	2.4135	0	1.36929	0	0	1.09103	0	-0.937973	3.64844	0.0106725	0.149073
Zfp180	-1.12703	-0.269846	-4.73585	-1.81461	0.0827674	-4.73585	-4.73585	-2.40971	-0.21979	2.92425	0.0106778	0.149073
Cbll1	-0.797789	-2.02429	-6.2014	-1.39196	-2.76091	-6.2014	-1.52109	-3.38204	0.350858	2.8751	0.0106907	0.149158
Gm17455	-1.166	-1.166	-1.166	-1.166	-1.166	-1.166	1.35218	-1.166	-0.94465	3.35838	0.0107427	0.149654
Foxg1	-3.06177	-3.06177	-3.06177	-3.06177	-3.06177	-3.06177	-3.06177	-3.06177	-0.908783	3.64958	0.0107453	0.149654
Lrrc1	-1.9875	0.0465439	1.32591	-0.543088	0.740175	-1.9875	-1.9875	-0.378842	-0.828427	3.0148	0.0107525	0.149654
Ddx51	0	0	0	0	2.03813	2.53759	2.30538	2.37844	-0.876357	4.56375	0.0107623	0.149654
Dennd2d	0	0	0	0.584239	0	0	2.51875	0	-0.959697	4.23907	0.0107629	0.149654
Rpp40	-0.316591	-2.95615	0.0302321	-0.0761153	1.0737	-2.95615	1.29552	1.25822	-0.401946	2.87167	0.0107674	0.149654
Zfp759	0.0772644	-2.97377	-1.10295	0.694817	-2.97377	-2.97377	-2.97377	-1.49041	-0.685308	2.97983	0.010821	0.15023
Zfp809	1.02442	0.943377	0	1.77901	3.09647	0	1.09033	0	-0.897627	4.09211	0.0108227	0.15023
Dnaic2	1.85268	2.66468	2.98939	4.49794	3.53483	0	1.08275	3.68046	-0.492032	2.86799	0.0108507	0.150523
Uvssa	1.3337	1.64203	-1.71683	-1.13676	0.777764	-1.71683	-1.71683	1.11721	-0.740303	2.91577	0.0108618	0.150582
Arhgef1	-0.374392	-4.6865	-2.82021	-1.45203	-0.268972	-4.6865	-0.321246	-4.6865	-0.24292	2.91351	0.0109112	0.151171
Rgs14	3.67317	2.89662	0	1.77292	0	0	0	1.62529	-0.773701	3.05311	0.0110128	0.152481
Nyap1	1.66486	0.823089	2.85914	1.02135	2.08796	3.52796	1.47835	-1.19789	-0.562053	2.82146	0.0110376	0.152728
Napepld	1.57941	-3.83937	-3.83937	0.651533	0.559332	0.496157	-0.926033	0.0997497	-0.0153789	2.85933	0.011049	0.152788
Zfp446	1.42587	0.240367	0.675502	2.46701	2.3472	-1.19512	0.702366	-1.19512	-0.672331	2.85902	0.011056	0.152788
Scrn3	0.582187	-0.849302	0.245795	1.53368	-1.78639	-4.48522	-0.0783597	-1.58948	0.253155	2.82	0.0110724	0.152872
Zfp568	-0.876554	-0.876554	-0.876554	1.15658	1.37842	-0.876554	-0.876554	-0.876554	-0.936221	3.16498	0.0110792	0.152872
Gm30316	0	0.943569	1.87628	1.23007	2.68091	2.53824	0	0	-0.907927	4.52041	0.0110831	0.152872
Cdk2	0	1.63095	1.87481	2.48114	2.84522	0	0	2.32027	-0.828611	2.96536	0.0111263	0.15327
Pde2a	-2.58848	-1.88295	-4.40157	-1.32546	-2.58648	-7.98481	-1.1302	-2.38107	1.60369	2.81745	0.0111335	0.15327
Iffo2	-1.97399	-0.566145	0.2085	-2.7606	-0.11062	-3.33985	-0.832083	-3.33985	-0.681539	2.85517	0.0111454	0.15327
Arap3	-2.79818	-0.410923	1.78764	1.6831	-2.79818	-2.79818	0.311575	1.14413	-0.39384	2.90294	0.0111463	0.15327
Unc13d	0	0	0	2.1398	1.67299	0	1.50466	0	-0.930512	3.16124	0.0111489	0.15327
L3mbtl4	-0.876341	-0.876341	-0.876341	1.60848	0.263992	-0.876341	0.533627	-0.876341	-0.920518	3.04564	0.011163	0.15327
Stxbp5	-0.380481	0.807846	-2.094	-0.478689	0.261694	-3.42486	-0.595799	-4.47622	0.963141	2.78469	0.0111702	0.15327
Gm45445	0	2.72474	1.87226	1.3963	1.0251	0	3.39257	2.81921	-0.756567	4.53376	0.0111732	0.15327
Acvr2b	-3.10096	-0.479483	-4.23243	-0.860479	0.0181319	-4.23243	-0.0447967	-4.23243	-0.380835	2.90152	0.0111781	0.15327
Cfap97d2	0.250352	1.68965	0.141282	3.20749	0.720566	0.696419	0.789426	3.04912	-0.0301948	2.78421	0.0111822	0.15327
Wrn	0.0834704	-2.14539	-1.17057	-1.70714	-2.65935	-5.69008	-1.63269	-4.08143	0.18294	2.81457	0.0112028	0.153424
Limk2	-0.308248	-0.729996	-6.03158	-1.32778	-1.27581	1.60466	-0.394364	-4.34158	0.964186	2.81438	0.0112074	0.153424
Akip1	1.18299	-1.09374	1.13797	-0.395973	2.30519	-1.30467	0.200346	-0.667969	0.977069	2.78245	0.0112257	0.153546
Ogfrl1	-1.62974	0.518767	0.714856	1.06411	-1.06943	-3.02606	-3.02606	-1.33131	-0.536987	2.85154	0.0112304	0.153546
Ltbp1	1.3848	-0.795675	-3.96113	-0.697602	1.04336	-1.83088	-0.177112	-1.18129	1.18786	2.78164	0.0112457	0.153659
Ccdc65	-1.72135	-1.00781	-4.51901	-0.606815	-1.80375	-4.51901	-0.783496	-0.826918	-0.303042	2.84935	0.0112818	0.154055
Rtp3	-0.166012	1.05975	2.23292	1.43612	1.13559	-1.72797	-0.641967	-1.72797	-0.681979	2.84881	0.0112947	0.154108
Tstd2	-2.52798	-1.30125	-4.37828	1.3654	0.495221	-1.40173	-1.62984	0.44687	0.102489	2.81024	0.0113077	0.154108
Cenpc1	-0.333779	-0.199817	-4.86275	0.969872	-0.289767	-1.55737	-2.55744	-1.71574	0.210454	2.81001	0.0113133	0.154108
Hic1	-1.72024	-0.278857	0.154569	-1.13796	-1.72024	0.816444	1.90373	-1.72024	-0.828301	5.16775	0.0113139	0.154108
Col12a1	-1.16677	1.63394	-1.16677	0.0631985	-0.139727	-1.16677	0.47642	-1.16677	-0.904247	2.95577	0.0113335	0.154195
Nup160	0.717363	0.335043	-2.19729	0.338374	3.30117	0.636286	-0.567877	1.79615	-0.382868	2.80877	0.0113436	0.154195
Ttc16	0.193517	-1.37376	-1.37376	1.10982	1.00453	-1.37376	-1.37376	-1.37376	-0.891938	3.03665	0.0113466	0.154195
Il7	0	0	0	1.09007	2.95779	0	0	1.48679	-0.908043	3.15065	0.0113486	0.154195
Ocln	1.25438	-1.49245	0.340165	-1.12722	-1.53407	-0.718414	-1.43478	-3.70977	-0.378148	2.80685	0.0113908	0.15465
Rcor2	-0.875872	1.80976	-0.875872	1.53074	0.150967	-0.875872	0.629974	-0.875872	-0.883464	2.95286	0.0113972	0.15465
Adamts8	1.02404	0	1.8755	0.955212	2.038	2.53742	3.00372	0	-0.867701	5.40991	0.0114033	0.15465
Duoxa1	1.02526	0	0	2.03399	1.02758	0	0	0	-0.95526	3.14612	0.0114351	0.154835
Dysf	1.45383	0.285689	-3.84892	-2.92686	-2.17821	-3.84892	1.09689	1.24439	0.0071075	2.84277	0.0114381	0.154835
LOC115486519	-3.6555	-1.10938	-3.6555	-1.11119	0.272942	-3.6555	-3.6555	-3.6555	-0.685144	3.03215	0.0114396	0.154835
Samd10	2.86603	2.4029	2.49531	0	2.67528	0	2.69658	2.57434	-0.749728	2.8898	0.0114454	0.154835
Tnnt1	-1.58187	-1.85954	-5.08569	-0.798884	-0.387534	-5.08569	0.314599	-3.60144	0.00848467	2.84146	0.0114697	0.154928
Ubtd1	1.694	0.314869	1.11008	1.20217	1.3145	1.07664	3.05009	0.172824	-0.570195	2.82484	0.0114781	0.154928
Hdhd5	0.00692323	0.0103597	-3.78798	0.346452	-3.78798	-1.26068	-3.78798	-3.78798	-0.454443	2.94906	0.011481	0.154928
Ddo	-2.96082	-2.96082	-0.616864	-0.543854	-2.96082	-2.96082	-2.96082	-2.96082	-0.829984	3.54584	0.0114869	0.154928
Eya1	1.95675	-0.711251	-1.64422	2.09655	-1.64422	0.881847	2.79663	2.78735	-0.391082	2.8407	0.0114877	0.154928
Capn5	0.945628	0.526517	-0.0773414	1.58105	0.787872	-4.14992	-1.14641	-4.14992	0.208499	2.8399	0.0115071	0.155094
Cenpj	-0.0316893	-1.16659	0.709815	1.2413	-1.16659	-1.16659	-1.16659	-1.16659	-0.913898	3.0273	0.0115407	0.155446
Gm10479	0.176232	-0.877919	-3.65917	-1.53679	-0.940026	-0.0677168	-2.5754	-2.03333	-0.563873	2.80051	0.0115475	0.155446
Fam47e	-3.80207	-1.02159	-4.81956	-1.93248	-4.81956	-4.81956	-0.951999	-3.21076	-0.447202	2.88386	0.0115833	0.15573
Fyb	-1.45913	-1.45913	-1.45913	0.574761	-1.45913	-1.45913	-1.45913	-1.45913	-0.953061	3.30805	0.0115848	0.15573
Gm10685	0.514453	0.852642	4.49732	0.483995	-0.333913	0.587032	0.853808	1.25159	0.749375	2.768	0.01159	0.15573
Fmnl3	-1.89902	-0.125122	-1.89902	1.2457	1.35807	-1.89902	0.108487	0.450928	-0.732646	2.88231	0.0116194	0.156029
Gpc6	1.40099	-0.739265	0.312455	-1.29035	-0.227087	1.76709	0.237596	-0.616564	-0.48859	2.76519	0.0116622	0.156507
Apold1	-0.159793	1.28046	-1.7258	0.785399	-0.585568	-1.7258	-1.7258	-1.7258	-0.823874	3.15384	0.0116771	0.156611
Gm39124	0.911143	0.75443	1.82684	1.90838	0.287024	-2.52534	2.33786	-0.265982	-0.251045	2.79375	0.0117168	0.156986
Ovol1	-2.55415	-1.6101	-2.55415	-2.55415	-2.55415	-2.55415	-1.46322	-2.55415	-0.932491	4.42456	0.0117194	0.156986
Kctd12b	1.4402	0.594484	1.02754	-0.258552	-2.75314	-2.75314	-0.473839	-0.312332	-0.528361	2.8295	0.01176	0.157433
Rhbdf1	1.35976	0	0	2.62259	1.02695	0	0	1.6249	-0.895273	3.01624	0.011775	0.157537
Setmar	-0.718256	-3.88204	-2.01392	-2.93538	-2.09752	0.19388	-1.60162	-1.37913	-0.568797	2.79095	0.0117878	0.157611
Rpap3	0.174187	-0.106492	-2.30047	1.17122	0.583208	-5.62207	-0.373853	1.45276	1.25711	2.79017	0.0118076	0.157779
Gm51950	1.01946	0	2.72358	0.577728	5.06228	2.98472	1.98397	2.92505	-0.596799	3.39903	0.0118283	0.157959
Tnfsfm13	-1.23802	0.790243	0.76805	-0.270878	-0.413936	-3.39284	-3.39284	-3.39284	-0.499851	2.87302	0.0118392	0.158008
Mthfd1l	-2.29042	0.314869	-3.30931	-1.18725	0.886618	-3.30931	0.487646	-3.30931	-0.555254	2.87257	0.0118499	0.158054
Gm9282	0.0475167	-0.756633	-3.15835	-1.13571	-0.622163	-0.625123	-3.15835	-3.15835	-0.725843	2.87191	0.0118657	0.158168
Thumpd2	-4.40446	-2.01042	-4.40446	-1.81587	-1.15962	-4.40446	-2.42031	-1.37984	-0.562101	2.87041	0.0119017	0.158289
Trpc6	-2.23222	-2.23222	-2.23222	-2.23222	-2.23222	-2.23222	0.0615748	-2.23222	-0.930531	3.29008	0.0119022	0.158289
Zbtb7b	-2.69321	-5.0956	-5.0956	-0.981599	-5.0956	-5.0956	-5.0956	-1.41862	-0.340206	3.01032	0.0119022	0.158289
Asxl1	-0.814591	-1.31486	-4.21544	1.32801	-0.32824	-0.135272	-1.21876	-1.24959	-0.0734765	2.78615	0.0119104	0.158289
Baz1a	0.784033	-2.38768	-2.38768	-1.46686	-2.38768	-2.38768	-2.38768	0.189529	-0.823828	3.00992	0.011911	0.158289
Zbtb46	-0.876759	1.53737	-0.876759	0.354645	-0.876759	-0.876759	-0.876759	-0.876759	-0.95074	3.5915	0.0119245	0.158298
Mfap3	-1.82005	-1.14368	-0.454802	-1.71835	-0.700942	-1.49506	0.405314	-4.0223	-0.451602	2.78531	0.011932	0.158298
9530077C05Rik	-1.29475	-0.493682	-4.33922	0.355693	0.354715	-4.33922	-4.33922	-0.135717	-0.143151	2.86879	0.0119407	0.158298
Gm28729	3.67122	0.942209	0	1.07066	0	0	0	1.48586	-0.828348	3.0531	0.0119407	0.158298
Ccdc189	-2.00857	0.158494	-1.15889	0.103398	0.516514	-3.02892	-3.02892	-1.32868	-0.646841	2.82164	0.0119552	0.158394
Ptpn12	2.34293	-1.43014	-1.34089	-0.665649	-1.56107	-5.86816	-1.1032	0.174457	1.18347	2.78401	0.0119654	0.158433
Deup1	1.135	0.944097	0	2.14	0	0	0	1.48715	-0.935031	3.00664	0.0119821	0.158558
Heph	-1.53797	0.117327	0.900974	-1.02125	-2.67175	1.0846	-1.58528	-1.18807	-0.716059	2.78289	0.0119943	0.158623
Gm35364	0	3.21536	0	0.955127	2.11026	0	0	1.62497	-0.863772	4.40143	0.0120021	0.15863
Kbtbd8	0.540802	-3.09781	0.64522	-0.0658498	-3.09781	-0.26609	-0.872749	-3.09781	-0.591518	2.86561	0.0120175	0.158737
Fbrsl1	-1.74647	-0.246351	1.30789	-0.280292	0.799945	-2.87959	-2.87959	-0.376929	-0.583626	2.81852	0.0120335	0.158853
Msh3	0.219697	-0.161321	-1.92783	2.56131	1.81675	-1.92783	1.1444	-0.319044	-0.525528	2.81714	0.0120682	0.159189
Fat4	0.276304	0.491377	0.184871	-0.256334	-2.38569	-2.38569	-2.38569	-2.38569	-0.791181	2.92294	0.0120736	0.159189
Ccdc69	-0.019214	-2.17194	-2.17194	-2.17194	-0.207809	-2.17194	0.667334	-2.17194	-0.856043	3.12897	0.0121034	0.159486
Actn1	-0.788195	-0.777629	-5.49474	-1.52914	-0.956795	-2.95772	-0.280736	-3.79756	0.190013	2.77657	0.012159	0.160122
Kazald1	0.349025	0.57292	-3.01914	0.131378	0.507923	-4.89561	0.639187	-4.89561	0.430806	2.81154	0.0122105	0.160703
Bclaf3	4.02828	3.98503	0	3.62394	2.97581	0	4.58394	1.47963	-0.396564	2.85425	0.0122961	0.161662
Ankrd13b	-2.98853	-1.69763	-5.31873	-1.47899	-0.743836	-7.19564	-2.22807	-2.08624	1.03597	2.77129	0.0122982	0.161662
Itgad	-3.23947	-0.696127	-3.23947	0.260054	0.40984	-3.23947	-1.82537	-1.54585	-0.631205	2.85357	0.0123131	0.1617
Rps19-ps3	3.12705	1.77141	2.56606	1.22144	2.10701	0	2.50164	3.88655	-0.652869	3.10252	0.0123159	0.1617
4930481A15Rik	-0.772036	-0.534185	1.94474	-0.769234	-1.061	-3.42895	0.574874	-0.520839	-0.345845	2.76953	0.012345	0.161984
Acvr1c	-0.224923	-4.19819	-2.33293	-0.876655	-4.19819	-1.67159	-4.19819	-0.173483	-0.420058	2.85155	0.0123635	0.162129
Zfp579	0.148208	2.40265	1.47332	1.97254	1.23464	-0.873764	0.636214	-0.873764	-0.763328	2.80485	0.0123827	0.162284
Ece1	-0.0317842	-1.79751	-0.970825	0.0621139	-1.94172	-0.823312	-1.25403	-5.70222	0.488759	2.76666	0.0124216	0.162566
Gm4918	-3.14766	-3.14766	-1.27584	-1.02303	-0.834992	-0.317471	-1.73486	-0.70882	-0.739022	3.13446	0.0124224	0.162566
Brf1	0.49155	-1.91423	-2.05145	0.012369	-1.23389	-6.5788	-0.8682	-2.45506	1.18695	2.76638	0.0124289	0.162566
Ccng2	-1.48663	-2.55257	-3.49114	-0.618846	-1.17942	-3.49114	-0.522593	-3.49114	-0.688298	4.07728	0.0124466	0.162566
Sp9	-0.962244	2.12248	-1.98396	-1.98396	0.0513442	0.549821	-1.98396	-0.284936	-0.74888	3.32923	0.0124503	0.162566
Serpinb1b	2.70969	0	0	1.82106	1.58261	2.97461	2.70114	0	-0.824105	2.9068	0.0124553	0.162566
Cmah	0	0	0	2.23855	0	0	0	0	-0.963107	3.53296	0.0124638	0.162566
Tex15	0	0	0	2.23855	0	0	0	0	-0.963107	3.53296	0.0124638	0.162566
Rtp4	0.584268	-2.92064	-2.92064	-0.691041	-2.92064	-2.92064	-1.83271	-2.92064	-0.78517	2.98377	0.0124912	0.162793
Rad21l	1.332	2.51093	-0.869156	1.09433	2.26323	2.12086	3.11502	3.89809	-0.408937	2.7638	0.0124982	0.162793
Prkn	-0.545213	0.29466	-2.10875	1.65087	-2.10875	-2.10875	-0.470229	-2.10875	-0.758757	2.90387	0.0125259	0.162793
Col11a2	-3.59344	0.0203082	-0.0076746	0.0202134	0.489622	-4.6177	-4.6177	1.4379	0.243041	2.79916	0.0125311	0.162793
Dennd2a	1.61671	2.68863	2.43405	3.10603	3.09534	2.0399	-0.538346	0.0733805	-0.193244	2.73241	0.0125382	0.162793
Prkdc	2.33815	0.60303	0.700838	1.53962	1.81509	-1.17081	-1.17081	-1.17081	-0.731179	2.8445	0.0125405	0.162793
Abl2	0.148032	-0.418773	-4.12264	2.24551	1.28902	-1.296	1.10355	-0.586304	0.414486	2.76188	0.0125503	0.162793
Rab3il1	-0.0851393	1.93043	-2.5033	1.27892	0.881367	-4.84565	0.657491	-2.40872	0.804612	2.76164	0.0125566	0.162793
Crybb3	-2.80023	-2.80023	-2.80023	1.69009	0.615208	-2.80023	0.315588	-2.80023	-0.573192	2.98039	0.0125682	0.162793
AB010352	0	0.942473	1.8751	1.82148	1.76016	0	3.50644	0	-0.84503	4.42982	0.012573	0.162793
Cln3	-2.6627	-1.93352	-2.22447	-2.88179	-1.53956	-4.11243	-2.18759	-4.32463	0.426066	2.73089	0.0125804	0.162793
Arl9	1.27567	-1.64079	-1.64079	0.136771	-1.64079	0.896399	-0.551101	-1.64079	-0.855935	2.90151	0.0125829	0.162793
Grk6	-1.3784	-1.94128	-5.66848	-1.21191	-1.78637	-5.66848	-2.54704	-4.18481	-0.0368518	2.79708	0.0125856	0.162793
Gm7244	-2.28164	-3.30363	-3.30363	-0.614681	-1.34223	-3.30363	-0.606387	-3.30363	-0.763991	2.9014	0.0125857	0.162793
Dach2	-2.54963	-2.54963	-2.54963	-2.54963	-2.54963	-2.54963	-2.54963	-2.54963	-0.948832	3.52432	0.0126026	0.162819
Slc28a2	-2.54963	-2.54963	-2.54963	-2.54963	-2.54963	-2.54963	-2.54963	-2.54963	-0.948832	3.52432	0.0126026	0.162819
Plac8	0.482752	-2.1745	-3.11024	0.78556	-3.11024	-3.11024	0.657707	-1.62878	-0.551092	2.84065	0.0126383	0.163184
Csnk1g1	-0.28934	-1.98499	-0.55959	-1.73345	-0.896623	-4.33898	1.45916	-1.64452	1.65327	2.72821	0.0126552	0.163306
AU041133	0.196343	0.77528	0.894435	1.7761	-1.45478	2.07435	1.5424	0.244998	-0.684252	2.78156	0.0127089	0.163901
Ankrd34c	1.68601	-1.5403	2.20909	0.857899	-0.51544	-1.5403	1.1021	-1.5403	-0.736557	2.83733	0.0127234	0.163913
Crb1	-2.55447	-4.8809	-4.8809	-0.582066	-1.64986	-4.8809	-3.11354	1.01656	-0.0109392	2.83701	0.0127317	0.163913
Gm11772	0	1.44438	0	2.03322	0	0	0	1.62479	-0.938144	3.08222	0.0127323	0.163913
Reln	0.439171	0.512862	-2.38135	0.598241	-2.38135	-2.38135	-0.742744	-2.38135	-0.761353	2.89478	0.0127475	0.164011
Cntn5	-0.414405	-1.53663	-6.59989	-0.33792	-3.47424	-6.59989	0.80431	-3.40583	1.19117	2.78857	0.0128117	0.164462
Pdcd2	0.782824	-1.67184	-3.43279	-1.83047	-0.531256	1.96238	0.0333363	-0.550886	-0.3444	2.75221	0.0128145	0.164462
Tnfaip3	-0.520692	-0.676834	-2.45484	0.250651	-2.45484	0.0810741	-2.45484	-0.969436	-0.808675	2.83334	0.0128263	0.164462
Cacna1i	4.3996	3.397	0	3.7931	4.13184	0	2.2742	4.08765	-0.342567	2.83302	0.0128347	0.164462
Tmem220	-0.171984	1.48311	-1.19367	1.18601	2.45942	-1.19367	-0.106649	1.23039	-0.74699	2.78764	0.0128368	0.164462
Gm21936	-2.66115	-0.252407	-2.66115	-0.99879	-2.66115	0.167626	-0.678777	-2.66115	-0.825174	3.47695	0.0128433	0.164462
6820408C15Rik	2.3177	-1.01986	-4.50863	0.717265	0.730256	-1.53583	1.61003	-0.718575	0.726592	2.75091	0.0128506	0.164462
Krtcap3	0	2.09227	2.49405	1.77263	1.75949	3.53003	3.06624	0	-0.76856	3.4662	0.0128529	0.164462
Tmem161b	-3.60263	-2.30239	-2.22046	-2.17617	-2.88002	-7.50584	-2.85616	-3.31118	0.688959	2.7508	0.0128536	0.164462
Plag1	-2.08976	-0.556616	0.686664	-0.0349604	-0.746894	-3.22178	1.33197	-3.22178	-0.50164	2.78686	0.0128579	0.164462
Ppp1r18	-1.0063	0.64823	-2.02774	1.04942	-1.00294	-2.02774	-2.02774	1.24338	-0.731908	2.83173	0.012868	0.164494
Gm45935	-1.87191	-0.0914593	-1.87191	0.85219	-0.288704	-1.87191	-1.87191	-1.87191	-0.8676	2.96624	0.0128963	0.16476
Gtdc1	-4.49659	-0.857981	-1.56041	-1.4458	0.200874	-1.9698	-0.760287	-1.98494	-0.280827	2.7461	0.0129845	0.16579
Zfp275	-0.706091	-1.35806	-2.37095	-1.21535	-0.671392	-4.23692	-0.775569	-4.23692	-0.456517	2.78137	0.0130065	0.165973
Pcdhb4	-2.43243	-1.42757	-0.886786	-0.124544	-1.20534	-3.45296	-0.311826	-3.45296	-0.655508	2.87497	0.013024	0.1661
Zfp672	-0.206573	-2.25078	-7.90367	-1.40062	-1.5522	-7.90367	-0.593734	-1.43473	1.95364	2.77944	0.013059	0.166426
Gm38706	-0.980875	-0.0377485	0.89493	1.34335	-0.980875	-0.980875	0.620783	1.26842	-0.883704	2.82422	0.0130648	0.166426
Ubxn10	-0.196081	1.36639	-0.708133	-1.04229	-1.91993	-3.05981	-0.778209	-3.05981	-0.604323	2.7782	0.013093	0.16656
Kbtbd11	-0.956104	-2.37213	-3.73133	-0.0838853	-0.868898	-1.24523	-2.47281	-3.28671	0.232746	2.71254	0.0131011	0.16656
Myo18b	-0.848413	-0.546646	-1.98202	0.625349	1.61643	0.848786	-1.98202	1.73126	-0.666026	2.77773	0.013106	0.16656
Cep95	1.1193	-2.77972	-2.77972	0.781128	0.474353	-2.77972	0.0628714	1.83708	-0.408368	2.82242	0.0131123	0.16656
Tns2	-1.1295	-0.0679788	-0.918156	-0.743676	1.44412	1.73703	-0.431211	-3.27523	-0.382414	2.74142	0.0131161	0.16656
Manea	-0.0349705	0.862189	-1.16922	1.07587	1.0819	2.91649	-1.16922	-1.16922	-0.793556	2.82178	0.0131294	0.16656
Hook2	1.05223	-0.0584058	-1.73067	2.33245	1.44149	-4.07257	1.83962	-2.44772	0.550999	2.74079	0.0131342	0.16656
Plscr5	1.65547	2.41318	0	0.583759	0	0	1.64387	0	-0.931447	4.1468	0.0131394	0.16656
Ptpn3	-1.40548	-1.81494	-3.83096	0.996398	-0.77467	-3.83096	-0.720226	-3.83096	-0.425563	2.82123	0.013144	0.16656
Vwc2l	1.80216	1.42881	1.5882	2.87059	2.28431	3.9005	2.04517	-0.085957	-0.180725	2.71066	0.0131556	0.16661
Spon2	0	0	0	2.72024	0	2.5369	2.59414	1.62502	-0.840197	3.0813	0.0131681	0.166671
Cycs-ps1	-1.43073	0.907918	-0.696374	0.883814	-0.192895	-0.0349291	-0.579218	1.62288	-0.516627	2.708	0.013233	0.167396
Adal	0.848408	-1.92714	-2.85978	2.10659	-2.85978	0.131842	0.46475	0.956757	-0.323622	2.77272	0.0132441	0.167439
Mreg	-0.876506	0.906193	-0.876506	-0.292725	1.8051	-0.876506	-0.876506	-0.876506	-0.932752	3.91354	0.0132764	0.16775
Plekha4	0.164081	-3.64631	-1.77861	-0.018355	-2.50651	-1.11714	-2.5628	-1.13652	-0.546778	2.73551	0.0132843	0.167753
E4f1	-4.72808	-1.8593	-2.86223	-0.241652	-1.18982	-4.72808	-0.388072	-2.48346	-0.262895	2.76973	0.0133275	0.168134
Vstm5	-2.17554	-2.17554	-2.17554	-0.549535	0.311122	-2.17554	-2.17554	-2.17554	-0.902351	3.1236	0.0133299	0.168134
Pard3b	-0.14691	-2.4198	-2.51147	-2.74568	-1.77979	-4.86575	-2.86503	-0.47846	-0.21596	2.73269	0.0133656	0.168443
Zfp831	-1.45878	-1.45878	-1.45878	0.778224	-1.45878	-1.45878	-0.0489345	-1.45878	-0.930014	3.05327	0.0133698	0.168443
Slain2	0.609148	-3.55928	-0.57193	0.0465341	-0.921951	1.43175	-3.55928	0.353654	-0.276916	2.76757	0.0133877	0.16857
Cfap20dc	-2.91105	-2.91105	-2.91105	-0.677897	-2.91105	-2.91105	-0.326974	-2.91105	-0.832229	3.04865	0.0134746	0.169566
Nr4a1	-0.496481	-1.13392	-4.7521	-3.66715	-4.7521	-2.22529	-0.472407	-2.10651	-0.280028	2.76391	0.0134908	0.169673
Ccdc60	2.64046	1.83344	-1.17283	1.48454	2.70555	-1.17283	0.724364	-1.17283	-0.622951	2.8077	0.0135083	0.16976
Cacna1a	-0.965105	-1.2516	-4.87221	-0.216134	-0.370431	-3.52313	-1.08981	-5.65608	1.59308	2.69852	0.0135133	0.16976
Serpinb1c	3.21671	0	0	2.35081	1.67129	2.9768	1.63977	0	-0.791405	3.1217	0.013549	0.170111
Chrna6	1.56522	2.0324	1.87396	0	2.95965	0	1.89827	2.83426	-0.805995	3.06934	0.0135591	0.170139
Sh3d19	1.524	1.29342	-2.7965	0.411409	1.1986	-2.7965	-2.7965	-2.7965	-0.445109	2.86246	0.0135687	0.170163
Kdm8	1.53829	-1.62076	0.947048	1.47803	0.753608	-1.62076	-0.534208	0.00468076	-0.721253	2.76732	0.0135868	0.170177
Cutal	-0.564586	-1.38861	-3.41594	-0.291333	-3.41594	-3.41594	-3.41594	-3.41594	-0.714819	2.93744	0.0135917	0.170177
Tcim	0.251353	-2.02753	0.908295	-2.02753	-0.444239	-2.02753	-2.02753	-2.02753	-0.873423	4.80662	0.0135933	0.170177
Gm4983	-0.122297	-1.09655	-4.37369	-1.08776	-1.11963	0.539255	-2.09795	-4.37369	-0.297535	2.75987	0.0136054	0.170232
B3gnt4	0	0	0	2.72055	0	2.53822	0	0	-0.906828	3.1998	0.0136431	0.170605
Apbb2	-1.01632	-0.299391	-3.1787	0.993666	-0.714515	0.655672	-1.16357	-4.63138	1.98301	2.69133	0.0137295	0.171588
Gm2016	-1.28044	-2.0703	-1.72794	-2.26568	-1.64679	-1.24813	-1.57527	-4.07978	-0.598776	2.71973	0.0137443	0.171674
Fstl4	0.122961	-0.232047	-3.21002	-0.0491125	-3.21002	-3.21002	-3.21002	0.8082	-0.548278	2.85414	0.0137885	0.172128
Gm34589	-0.981108	-0.981108	-0.981108	0.799509	-0.981108	-0.981108	1.31298	-0.981108	-0.938938	3.03413	0.0138093	0.172184
Scube1	-2.84222	0.60902	-0.490751	-0.643852	0.139815	-2.84222	1.10698	-1.21649	-0.611062	2.75266	0.0138125	0.172184
2700081O15Rik	1.84879	-1.01783	-3.40649	-2.19171	0.0151048	-3.40649	-0.416621	-1.04193	-0.430993	2.75251	0.0138167	0.172184
Dpy19l4	0.958675	-2.20899	-3.97536	-0.821392	0.222031	-3.97536	0.367381	-0.581551	-0.194368	2.74774	0.0139555	0.173815
Rarb	1.27699	2.3904	1.69217	3.11583	2.64387	-0.871201	-0.871201	1.85923	-0.580069	2.74701	0.0139769	0.173842
Zfp26	2.53911	2.95067	0.416129	2.61809	3.63983	1.0778	3.86509	0.170464	-0.0444103	2.68324	0.0139774	0.173842
Man1c1	-2.51223	0.640592	-2.51223	0.400397	-2.51223	-2.51223	-0.503689	-0.813417	-0.762227	2.84695	0.0139816	0.173842
Ptk7	0.490408	2.02032	-0.873673	0.50144	0.797077	-0.873673	-0.873673	2.90379	-0.758054	2.78932	0.0140194	0.174213
Parp16	-0.147766	0.605707	1.32395	2.24886	1.50618	-1.1699	-1.1699	-1.1699	-0.771341	2.78898	0.014029	0.174219
Trim5	-2.57675	-1.58607	-3.5988	-1.69276	-1.41911	-3.5988	-1.59007	-3.5988	-0.767116	2.78874	0.0140359	0.174219
Ikzf2	1.12444	-1.13365	-1.67812	-0.818218	1.35373	-4.02619	0.837157	-4.02619	-0.0206568	2.74114	0.0141498	0.175534
Gm4865	1.82588	0.487107	-1.54008	0.983543	-1.54008	-1.54008	0.686781	1.73817	-0.71066	2.78433	0.0141614	0.175549
Slc2a5	-1.9856	-1.9856	-0.112261	0.36952	1.15768	-1.9856	0.454781	-0.376912	-0.790659	2.78414	0.0141672	0.175549
Zfp524	-1.34472	-3.5596	-3.71478	-2.29374	-1.65892	-5.58518	-1.97094	-1.46603	-0.0750463	2.70505	0.0141862	0.175685
Osbpl10	-0.37173	-1.30685	-5.38629	-0.614461	-0.461054	-2.48684	-0.419058	-5.38629	0.221352	2.73914	0.0142092	0.17587
Aadat	-3.26567	-1.23646	-1.39337	-0.764272	-0.493238	-3.26567	-1.85316	-1.78139	-0.758198	2.73883	0.0142185	0.175885
Bdp1	0.166196	-1.90528	0.277508	-0.166622	-1.64435	-0.227501	-1.82445	-5.82645	0.706787	2.70291	0.0142519	0.176199
Nhlrc2	-0.696646	0.83486	-1.72018	-0.349435	-0.693853	2.04203	-0.30913	-1.72018	-0.825231	2.73595	0.0143046	0.176698
Lbr	-0.0108286	-0.798665	-4.87476	-0.270491	-0.2471	0.712883	-1.62633	-3.26609	0.129245	2.70108	0.0143084	0.176698
Pear1	2.81539	0.942284	0	2.72021	2.48507	0	0	0	-0.83313	2.90829	0.014335	0.176925
Calcrl	1.50348	0.379174	2.66689	1.43159	0.957232	-2.3947	-0.977899	-0.785882	-0.396693	2.6993	0.0143633	0.177151
Plod2	3.24395	1.76221	-0.87016	2.3724	2.66625	-0.87016	1.64872	2.76654	-0.488654	2.73379	0.0143695	0.177151
Fktn	-1.27686	-2.42115	-5.72694	0.209617	0.0658492	-5.72694	-1.02292	-1.9325	0.483914	2.73279	0.0143994	0.177419
Arhgap10	1.26246	-1.38466	0.746618	-0.457895	-1.03838	-2.99568	-2.99568	-1.38691	-0.574128	2.73145	0.01444	0.177816
D030055H07Rik	-5.22729	-1.37275	-2.73212	-0.512997	-0.699358	-5.22729	-3.81468	-0.420136	0.00264955	2.73119	0.0144479	0.177816
Dop1a	-0.900197	-1.67437	-5.32647	-1.8295	-2.76871	-7.20398	-1.11221	-2.32016	1.08994	2.69619	0.0144602	0.177866
Rnf217	3.71421	2.00797	0	2.81878	2.24979	2.90479	1.41378	2.26095	-0.650449	2.72882	0.0145198	0.178392
Tmed5	-1.21361	1.12377	-0.209293	-0.657121	-0.318414	-4.32452	-0.199107	0.180649	0.0478979	2.69425	0.0145205	0.178392
Oas1g	0.45124	0.0446226	-1.98361	1.38611	1.35246	-1.98361	-1.98361	-1.98361	-0.737594	2.82636	0.01455	0.178392
Kif9	0	2.61671	0	1.23112	0	0	0	0	-0.941998	4.11438	0.0145521	0.178392
Gpr153	0.808932	0.0107395	-3.4538	-0.0546986	-3.4538	-0.925718	-2.37112	-1.12767	-0.488132	2.72734	0.0145649	0.178392
Zfp658	-1.54012	-0.103618	-1.54012	0.685857	1.41281	-1.54012	2.61228	0.605349	-0.716327	2.77012	0.0145743	0.178392
Izumo4	-4.0188	-0.703213	-3.46782	-1.0077	-1.28076	-7.23589	-0.681261	-0.377638	1.44485	2.69248	0.0145762	0.178392
Cebpa	-3.25168	-1.03271	-3.25168	0.960844	0.105282	-3.25168	1.55587	-1.77173	-0.425816	2.77006	0.0145763	0.178392
Kctd3	1.09723	0.179785	-2.64211	0.66185	0.842343	-4.51857	-4.51857	-0.27005	0.294054	2.72685	0.0145797	0.178392
Tcte3	3.83985	2.27656	3.82686	2.30863	3.13651	0	2.99067	2.74604	-0.573054	2.72669	0.0145847	0.178392
Trim54	-2.60935	-2.60935	-2.60935	-2.60935	-2.60935	-2.60935	-2.60935	-2.60935	-0.938769	3.4466	0.0146089	0.178588
Phtf2	2.16538	-3.23946	-1.36869	0.72338	1.48486	-0.258039	1.54381	-3.23946	-0.0598145	2.72546	0.0146224	0.178653
Gpr68	-0.498097	-1.17193	-3.84011	-1.17053	-2.70027	0.236118	-1.55943	-3.84011	-0.577238	2.72498	0.014637	0.178732
Zcchc4	-1.24892	-2.36221	-2.88398	-1.25804	-4.74819	-4.74819	-0.344336	-3.26897	-0.355411	2.7246	0.0146487	0.178775
Dhx34	0.299342	2.47129	0.712888	2.63852	-0.504723	3.21056	1.46497	-0.035472	-0.376793	2.6609	0.0146844	0.179066
Dhx37	0.514823	0.0616763	-2.83183	-2.25158	-0.350215	-2.83183	-2.83183	-2.83183	-0.750326	2.82145	0.0146889	0.179066
Slco1c1	-0.419318	-0.919052	-5.79255	-0.402184	-0.692064	-3.25419	-2.20644	-0.419947	0.5436	2.68834	0.014707	0.179186
Trim15	-0.84462	-4.70415	-4.70415	-1.7667	-1.41494	-4.70415	-2.42662	-3.09535	-0.468655	2.76497	0.0147271	0.17933
Sh3bp4	0.264533	-0.0941146	-0.827302	1.28092	1.09386	-3.18434	0.873378	-3.18434	-0.313503	2.72162	0.0147406	0.179394
Rbm12	-1.4374	-0.989112	-3.77079	-0.33749	-0.344563	-3.77079	-0.861013	-3.77079	-0.573056	2.76373	0.0147641	0.179529
Grip2	3.72459	2.57281	1.15433	3.75569	3.35846	1.33705	3.06444	0.413565	-0.0676392	2.65811	0.0147754	0.179529
Ghsr	2.82359	0.942421	0	1.91077	2.49674	0	2.30522	0	-0.841812	3.07411	0.0147833	0.179529
Trpm6	-3.2876	-1.84946	-3.2876	-0.609141	-1.70671	-3.2876	-0.0510306	-3.2876	-0.765708	2.81809	0.0147846	0.179529
Plekhh1	-1.79955	-0.393809	0.429697	-0.921844	0.136367	-3.67664	-2.59342	-2.05073	-0.526142	2.68553	0.0147962	0.179571
Apcdd1	0.63671	-0.180248	1.86949	-0.248131	-2.57649	-2.57649	-2.57649	0.473795	-0.609173	2.7608	0.014852	0.180147
Papln	1.02771	0.539936	-0.362124	0.989781	0.603038	-2.71551	-1.63212	-2.71551	-0.537862	2.71706	0.0148821	0.180413
Cacna2d3	-0.0404605	-1.5336	-4.90423	0.479622	0.348392	-4.90423	0.687735	-2.5541	0.293022	2.71658	0.014897	0.180493
Runx1	0.571661	-1.04551	-1.98829	-1.06782	0.691464	-1.98829	-1.98829	-1.98829	-0.863409	2.85878	0.0149235	0.180646
2010315B03Rik	-0.875937	1.80994	-0.875937	0.0442941	0.264363	-0.875937	1.41652	0.61061	-0.888794	2.75833	0.0149262	0.180646
Arhgap27	0.597156	-3.11078	-3.11078	0.453646	0.907886	-3.11078	-2.02692	-3.11078	-0.569378	2.81129	0.0149807	0.181206
Lhx6	2.79326	0.236481	-4.54907	-1.29347	0.50216	-2.01074	1.17309	-0.825139	0.581665	2.67828	0.0150295	0.181694
Cacna1d	-5.37938	-0.363795	-2.89378	1.27149	0.15962	-2.40686	-0.251897	0.805311	0.807791	2.67742	0.0150572	0.18184
Il16	3.05736	2.56022	-1.2011	2.06742	-0.179605	-1.2011	-0.11984	3.55432	-0.400086	2.71145	0.0150582	0.18184
Cfap65	-3.17543	1.26948	-3.17543	0.168971	-0.0668634	-3.17543	-1.27866	-1.54955	-0.542874	2.75333	0.0150781	0.18198
Lima1	0.141532	-0.420171	-3.08188	0.630802	-0.775466	-0.0919535	2.83663	-1.38597	-0.280327	2.67557	0.0151177	0.182357
Acsbg2	0	0	0	0	0	0	3.57973	0	-0.896781	3.38207	0.0151475	0.182602
Pilra	-0.624288	-1.46126	-2.89949	-2.89949	0.193014	-2.89949	-0.671728	-1.20754	-0.768024	2.75082	0.0151548	0.182602
Hsd17b7	-0.727322	-1.93727	-2.88035	-2.88035	-2.88035	-2.88035	-2.88035	-2.88035	-0.881132	3.26524	0.0151815	0.182824
C1s1	0.234181	0.691008	-2.19897	1.4785	1.31264	-2.19897	-2.19897	-2.19897	-0.67286	2.80354	0.0152071	0.183031
Pde5a	-1.62005	0.995514	-1.62005	-1.62005	-0.479786	0.917133	-1.62005	0.730034	-0.855703	3.5631	0.0152272	0.183171
Cdk20	-1.34354	-0.626866	-0.760315	0.304849	0.830473	-4.31697	-0.415269	1.56918	0.183996	2.67098	0.0152681	0.183562
Myadm	-0.922271	-1.65944	-2.74171	-1.74065	-1.61479	-2.70852	-0.320144	-5.24072	-0.0685477	2.67007	0.0152981	0.183821
Cryba4	1.23448	-0.609434	-2.38303	0.770546	-2.38303	-2.38303	-1.29643	-2.38303	-0.724436	2.79977	0.0153186	0.183967
Dazap1	2.07924	-0.422584	0.916532	0.568593	1.4215	-0.0654185	1.95347	-3.15835	1.58213	2.64103	0.0153434	0.184163
Myo16	-2.31123	-3.33339	-3.33339	-1.56053	-0.850999	-0.79891	-1.35048	-1.7247	-0.772801	2.70172	0.0153682	0.184285
Ints9	0.594615	-0.902931	-3.30239	-1.86489	-1.54347	-0.397936	-3.30239	-3.30239	-0.662539	2.74368	0.0153754	0.184285
Fhod3	0.854087	-0.120748	-0.780515	1.14478	0.404433	-1.23217	-1.83513	-4.53843	0.255632	2.66745	0.0153846	0.184285
Lrrc38	2.91429	0	0	2.76095	2.31396	2.82956	1.08793	0	-0.785176	2.79746	0.0153874	0.184285
Tmcc1	0.288574	-1.96139	-5.06701	-0.082826	0.171855	-4.12814	0.63569	-0.0526406	1.8946	2.63926	0.0154036	0.184374
Kcns2	-0.159827	-0.763976	-3.03181	-2.45122	-0.355905	-3.03181	-1.39301	-3.03181	-0.766924	2.74251	0.0154117	0.184374
H2-DMb2	0.214481	0.830385	1.28048	2.11686	-0.0455769	-1.71553	-1.71553	0.857356	-0.679166	2.79398	0.0154442	0.184578
Leng8	-2.12015	-0.288659	-3.64833	-1.38063	-1.16414	-2.98645	-0.225183	-3.9146	0.175595	2.63802	0.0154456	0.184578
Taf8	-0.608817	-1.9032	-2.57345	-2.22344	-1.53587	-4.44017	-0.383069	0.592537	-0.221609	2.66467	0.0154772	0.184854
Ankrd16	0.135956	-0.690851	-0.848353	1.42462	0.117768	-2.71283	2.29181	-1.08659	-0.373124	2.66333	0.015522	0.185287
Plk4	-2.33993	-3.474	-3.474	-2.22113	-0.357663	-3.474	-2.38648	-3.474	-0.769833	2.79204	0.0155499	0.185505
Aurka	0.218401	-0.509603	-3.6705	-0.169558	-2.00231	-3.6705	-0.982093	-3.6705	-0.520003	2.73787	0.0155573	0.185505
Fgf2	-0.965635	-2.03914	-4.05597	-0.437257	-0.519327	-1.52881	-4.05597	-0.661184	-0.447858	2.69545	0.0155716	0.185506
Gm41949	1.56737	0	2.57446	0	2.11065	0	0	2.24942	-0.896948	4.78682	0.0155743	0.185506
Rec114	-2.10834	-1.81745	0.0187731	-1.26025	-0.501938	-5.72238	-0.189892	-4.09754	0.367763	2.66119	0.0155937	0.185636
Klhl28	0.79792	-0.672541	0.422945	0.129062	-0.0976955	-1.14269	0.383736	-2.96112	0.150995	2.63342	0.0156035	0.185651
LOC118567481	-3.4055	-3.4055	-3.4055	-3.4055	-0.726265	-3.4055	-3.4055	-3.4055	-0.841759	3.11066	0.0156298	0.185718
LOC118568080	-3.4055	-3.4055	-3.4055	-3.4055	-0.726265	-3.4055	-3.4055	-3.4055	-0.841759	3.11066	0.0156298	0.185718
Rnpep	1.11173	0.469922	-1.05809	1.3716	0.423555	-4.47941	0.637871	-1.15635	0.468208	2.65998	0.0156347	0.185718
Pik3c2b	-0.0912735	-1.77154	-5.06871	0.0703338	-2.81802	-2.53388	-1.55734	-1.18222	0.0552769	2.65972	0.0156433	0.18572
Tmem100	-0.709551	-2.19197	-3.06554	-1.59944	-1.51004	-5.55623	-0.733216	-1.87545	0.111811	2.65879	0.0156749	0.185993
Fermt1	1.0246	1.44355	0	2.4872	1.14032	0	1.09055	0	-0.910845	3.1207	0.0156955	0.186137
Ttc12	-0.766355	0.753817	-1.78505	2.2971	1.78319	-1.78505	1.20451	1.78869	-0.539632	2.69109	0.0157146	0.186154
Sh3pxd2a	-3.67845	-1.45878	-1.32275	-0.0363825	-0.00940807	-3.67845	-3.67845	0.867811	-0.443924	2.73234	0.0157325	0.186154
Ptgis	-2.53528	-1.09356	0.0377128	0.081808	-1.50881	-2.53528	-2.53528	-2.53528	-0.842297	4.48436	0.0157329	0.186154
Kremen1	-0.654621	-1.43099	-4.62104	0.214726	-1.79205	-4.62104	-3.10411	-4.62104	-0.222116	2.73209	0.0157403	0.186154
Carf	-0.701853	0.673348	-3.13251	0.716294	-3.13251	-3.13251	-3.13251	-1.4316	-0.605949	2.78544	0.0157501	0.186154
Kank4	1.88479	0.0996389	2.13601	0.470333	0.322333	0.606666	-1.92464	-1.92464	-0.636124	2.68988	0.0157543	0.186154
Chst15	2.63983	0	0	1.77886	2.18135	0	0	0	-0.893501	2.95625	0.0157599	0.186154
Gm10037	0.147453	-1.01094	-1.64217	0.103957	-0.888492	-1.81989	1.78855	1.00711	0.449129	2.62875	0.0157652	0.186154
Dpep2	1.02476	0	0	2.23666	1.02722	0	0	1.68973	-0.922136	2.85573	0.0157829	0.186262
Gm13201	1.36038	0	1.87549	1.22894	2.67985	0	0	2.42884	-0.86723	2.96955	0.015798	0.18634
Bfsp1	-2.85089	-2.85089	-2.85089	-2.85089	-2.85089	-2.85089	-2.85089	-2.85089	-0.929043	3.34806	0.0158356	0.186396
Otogl	-2.85089	-2.85089	-2.85089	-2.85089	-2.85089	-2.85089	-2.85089	-2.85089	-0.929043	3.34806	0.0158356	0.186396
Tfap2a	-2.85089	-2.85089	-2.85089	-2.85089	-2.85089	-2.85089	-2.85089	-2.85089	-0.929043	3.34806	0.0158356	0.186396
Acot5	-2.81009	-1.36834	-2.81009	-0.256804	-0.55715	-2.81009	-2.81009	-2.81009	-0.843598	2.85359	0.0158449	0.186396
Gm6206	0.55022	-0.283551	-0.821293	0.0578496	-0.744012	-0.854335	-3.38284	-3.38284	-0.508247	2.76499	0.0158455	0.186396
Gm32208	0.778884	1.53506	-0.875834	1.53065	-0.875834	-0.875834	1.13741	-0.875834	-0.880293	2.77942	0.015935	0.187338
Gpr19	0.420394	-0.190926	-3.06109	-1.59418	-0.498219	-6.06619	-1.05113	-3.70196	0.763562	2.6509	0.0159438	0.187338
Arhgef10l	-0.0611763	-1.21772	-6.88302	1.74801	0.43824	-2.18426	-2.00203	0.302584	2.05488	2.65068	0.0159513	0.187338
Aff3	-3.76326	-3.16716	-3.02664	0.00102335	-0.0455109	-2.36503	-0.963842	-1.84346	-0.0860559	2.62311	0.0159629	0.187373
Gm36129	0.153911	1.43241	-0.981105	-0.981105	0.159247	-0.981105	-0.981105	-0.981105	-0.938371	3.28723	0.0159963	0.187571
Pola2	2.79159	0	0	1.06562	0	0	1.41015	0	-0.906025	2.94707	0.0160081	0.187571
Sema4g	-1.9009	0.331685	-2.42663	0.78772	0.312598	-4.77083	-1.42739	-2.52208	0.156762	2.64897	0.0160103	0.187571
Xkr4	-0.557243	0.869816	-3.71149	-0.707275	-0.531364	-1.18473	-1.0518	-3.71149	-0.428212	2.80337	0.016025	0.187571
Gpnmb	0	0	0	0	2.49803	2.53896	0	0	-0.940059	4.26926	0.0160342	0.187571
9230110K08Rik	0	0	0	0	2.25492	2.89818	0	0	-0.933836	3.70201	0.0160342	0.187571
Gm6439	-0.654506	-0.0155761	-1.7882	-0.129493	-1.7882	2.40819	0.195191	1.93539	-0.692839	3.97974	0.0160444	0.187571
Sgms1	-1.97505	-0.957806	-2.60975	-0.403762	-1.27555	-8.97589	-0.508559	-0.488647	3.09264	2.64786	0.0160486	0.187571
Dmwd	0.697392	-0.791137	-2.71524	0.141927	-0.380408	-4.58732	-0.909776	-3.10317	-0.000669792	2.647	0.0160784	0.187819
Ncoa6	-1.80836	-2.58903	-6.11425	-0.90246	-0.423013	-6.11425	-0.926176	-1.15686	0.525862	2.67968	0.016095	0.187912
Itpr3	-2.39145	-2.39145	-2.39145	-2.39145	-2.39145	-2.39145	-2.39145	-2.39145	-0.955998	3.33384	0.0161335	0.188261
Fam124a	-0.284471	-0.202486	-0.0874353	-0.530032	-2.43507	1.64802	-0.796895	-2.43507	-0.747457	2.67802	0.0161509	0.188364
Ctdp1	0	2.6846	0	2.3233	2.18104	0	2.01271	1.48621	-0.85978	2.77174	0.0161741	0.188533
Fbxo42	-0.582059	-3.42118	-1.79624	-0.713881	-0.187244	-4.35353	-0.821962	-2.21469	-0.346588	2.6432	0.0162109	0.188742
Ankrd42	1.79541	-0.0908687	-3.36403	-0.632788	0.531999	-3.36403	0.959186	-1.88376	-0.261257	2.67609	0.0162165	0.188742
4921522P10Rik	0.571478	-1.71571	0.396093	-2.57104	-1.5708	-0.243238	-0.643997	-1.00564	-0.612996	2.61593	0.0162179	0.188742
Cep57	-1.31915	1.64678	-3.03398	0.490537	0.31936	-2.544	1.41508	0.250122	1.23594	2.61481	0.016258	0.188984
Nr2f6	1.49837	1.57373	3.0931	3.67715	2.32968	1.32384	2.53467	-1.20174	-0.327393	2.64182	0.0162589	0.188984
Rps6ka1	1.17212	0.715173	-2.56202	0.465943	1.3343	2.5484	-0.0634751	-2.56202	-0.409036	2.67468	0.0162647	0.188984
Hpgd	-0.188513	-3.25403	0.966349	-0.245448	-0.722923	-3.25403	-0.578842	0.150728	-0.507397	2.67426	0.0162787	0.189047
Gm4887	0.260429	2.56684	0.998526	1.63846	0.15148	-0.873509	2.31958	-0.873509	-0.747968	4.13812	0.0163081	0.18918
H2-T24	0.296039	-1.04664	-2.80832	-0.744863	1.63893	1.71975	1.53205	1.05099	-0.32	2.64035	0.0163106	0.18918
Fes	2.78963	1.77916	0	2.00939	1.02632	0	2.86166	0	-0.824842	2.76703	0.0163224	0.18918
Rnpc3	0.808587	1.16548	-2.09828	1.67425	0.853042	0.428847	2.50011	-2.09828	-0.446539	2.67229	0.0163462	0.18918
Gm32815	0.258564	-0.876382	-0.876382	1.15621	-0.876382	-0.876382	1.41718	-0.876382	-0.923614	2.83658	0.016347	0.18918
Cyp2j8	-2.67652	-2.67652	-2.67652	-1.71981	-2.67652	-2.67652	-2.67652	-2.67652	-0.931842	3.08137	0.0163479	0.18918
Caskin2	2.27974	0.337817	-1.52354	1.22749	1.5845	-3.39902	0.0938846	1.94992	0.216749	2.63902	0.0163576	0.18918
Acy3	0.141352	-0.681865	-1.44817	-0.990832	-0.497964	0.0604113	-1.83894	1.25395	0.583438	2.61171	0.0163697	0.18918
Snap23	-0.257992	-1.77664	-3.91411	0.44771	-0.390439	-1.23918	-0.110342	-3.28762	0.707777	2.61153	0.0163764	0.18918
Trim68	-2.06094	-1.0356	-3.71321	-2.47733	-2.68806	-3.71321	-3.71321	-2.08788	-0.760747	2.71251	0.0163769	0.18918
Gria3	-2.70653	-2.89569	-2.5207	-1.49243	-2.14766	-7.43304	-1.23184	-2.6151	1.10025	2.63743	0.0164136	0.189504
D2hgdh	0.918221	-1.70916	-4.31298	-0.0834405	-1.06548	-2.08353	0.102838	0.0105677	1.60403	2.60994	0.0164338	0.189637
Bbox1	-3.1539	0.39133	-0.592308	-0.0349847	-1.4858	-3.1539	-0.305623	1.05929	-0.510344	2.66784	0.0164994	0.190199
Chd1	1.60867	-0.546677	-1.98172	0.98582	1.56012	-1.98172	-0.896089	0.4578	-0.655449	2.66782	0.0165	0.190199
Ccdc138	2.20125	1.37086	-2.42437	0.158388	1.02001	0.485788	1.61327	-2.42437	-0.385568	2.66692	0.0165314	0.19046
Egr2	-1.21863	-1.75826	-2.28508	-2.68501	-2.1211	-0.858378	-2.15048	-2.67173	-0.593752	2.60596	0.0165791	0.190909
Ikzf4	2.16105	1.03706	-3.87759	0.0406372	0.132623	0.848383	1.32082	-3.87759	0.255761	2.66478	0.0166057	0.191114
Cd48	-3.16462	-2.2234	-3.16462	-2.2433	-1.40482	-0.629066	-3.16462	-0.720456	-0.800874	3.25715	0.0166336	0.191335
Brat1	-2.93386	0.23078	-3.95255	0.479446	0.881793	-3.95255	-2.53728	0.431057	-0.178105	2.66229	0.0166926	0.191913
Slc16a6	1.65681	0.311054	-3.15122	-0.136613	-3.15122	-3.15122	-0.243843	-1.52512	-0.446003	2.7025	0.0167125	0.19204
Smkr-ps	2.07727	2.57241	3.60107	3.63155	0	0	2.74547	1.60874	-0.65303	2.7021	0.0167259	0.192057
Dnajc28	-1.68674	-0.915906	-4.37861	0.302358	-0.273361	-4.37861	-0.712633	-2.75253	-0.259356	2.66103	0.0167368	0.192057
Galnt13	1.43246	0.157471	-0.928507	1.54411	0.482893	-3.86442	0.190631	-3.86442	0.101773	2.66093	0.0167404	0.192057
Tmem121	-0.786297	1.45178	-4.16649	-0.869533	0.929618	-4.16649	-0.889448	0.532445	0.0391021	2.65996	0.0167745	0.192315
Rptor	-0.177384	-1.66491	-5.44158	-1.20413	-0.585792	-2.90578	-5.44158	-1.96338	0.111535	2.65978	0.0167805	0.192315
Snx19	-0.869738	-2.55236	-3.11835	-1.10813	-1.20689	-1.27777	-1.16942	-4.06348	1.00004	2.59957	0.0168144	0.192602
Ncoa3	-2.32837	-2.34425	-2.13252	-0.179508	-4.13096	-2.99298	-0.414018	-1.52913	0.386201	2.59925	0.0168263	0.192637
3010001F23Rik	1.56749	1.62748	3.00519	0	0	0	1.64315	0	-0.902504	3.54293	0.0168357	0.192644
Gm25848	-1.93269	-1.93269	-1.93269	-0.863472	-0.349302	-1.93269	1.07149	-1.93269	-0.880387	2.81977	0.0168593	0.192813
Sgcd	-1.56553	-1.39933	-3.49539	-0.37515	-2.35539	-3.49539	-0.199039	-3.49539	-0.67006	2.69777	0.0168735	0.192874
Dok7	-2.89736	-0.00468652	-2.89736	0.101463	-0.789387	-0.363907	-1.48452	-2.89736	-0.735817	2.69707	0.0168973	0.193045
n-R5s110	-0.531484	0.295325	1.37206	1.72781	4.38463	2.39848	1.07203	1.71674	-0.183425	2.59617	0.0169412	0.193445
Itpripl1	-1.16707	-1.16707	-1.16707	0.86407	1.33024	1.37074	-0.0768979	-1.16707	-0.88731	2.7461	0.016999	0.194004
Ankrd44	2.17655	0.897865	-0.871695	1.94905	2.55612	-0.871695	-0.871695	3.29467	-0.614493	2.69252	0.0170539	0.194528
Gm40847	-0.0849431	-0.413854	-2.3974	-1.53975	-4.26233	-4.26233	-2.74326	-0.935207	-0.400869	2.651	0.0170924	0.194856
Zfp85	-0.987844	-3.20255	-3.20255	-1.42555	-2.0623	-3.20255	-3.20255	-3.20255	-0.838703	2.81167	0.0171119	0.194856
Htr7	0.0744617	-2.29509	-1.96429	-1.32753	0.911591	-4.3167	-0.202976	-1.8763	-0.152839	2.61753	0.0171335	0.194856
Fcer2a	0	0	0	2.0347	0	0	0	0	-0.97039	3.28797	0.0171362	0.194856
Syde2	0	0	0	2.0347	0	0	0	0	-0.97039	3.28797	0.0171362	0.194856
Syna	0	0	0	2.0347	0	0	0	0	-0.97039	3.28797	0.0171362	0.194856
Cep120	0.840389	1.22407	-1.52144	-0.473593	-0.0715258	-3.38593	-0.210493	-3.38593	-0.374231	2.64877	0.0171726	0.195168
Saxo2	-3.18783	-1.54629	-3.18783	-0.874283	-3.18783	-3.18783	0.796437	-0.615052	-0.672154	2.74055	0.017183	0.195185
Tshz3	2.52955	1.17637	-1.36816	0.810373	1.47037	2.60313	-1.36816	0.11475	-0.649221	2.64794	0.0172026	0.195201
Prrt4	2.0799	-1.3041	-1.3041	0.832134	-1.3041	-1.3041	-1.3041	-1.3041	-0.839241	2.90466	0.0172085	0.195201
Akap13	-1.03546	-1.53622	-5.0179	-0.856004	-2.67084	-7.35452	-0.465915	-2.64305	1.37676	2.61541	0.0172121	0.195201
Dtx2	-1.53165	-1.79227	-6.22665	-1.87738	-2.37455	-1.67479	-1.6915	-4.53035	0.303629	2.61519	0.0172202	0.195201
Nmnat3	-0.0969728	0.171234	-3.19036	1.95038	-0.347816	2.64596	-0.191257	1.77858	0.0475083	2.61466	0.01724	0.195324
Vwa2	-1.93768	0.746512	-1.93768	-0.492667	-0.265475	0.599402	-1.93768	-0.240543	-0.850138	2.68678	0.0172532	0.195372
Cyb5d2	-0.144313	1.16988	-1.70632	1.61039	1.11134	1.59224	-1.70632	-0.0807995	-0.684954	2.86831	0.0172753	0.195431
Zc2hc1c	0.280876	-0.855176	-3.07417	0.64346	0.956454	-3.07417	-3.07417	1.23512	-0.426417	2.68571	0.0172908	0.195431
Tsga10	2.11401	1.34234	-1.69875	-0.24076	-0.371353	-6.80083	-0.284893	-0.965742	2.25432	2.61322	0.0172936	0.195431
Tesc	-0.0336333	-2.54679	-1.41582	-1.12947	-0.768705	0.0956329	0.208695	-3.97371	-0.374781	2.61311	0.0172977	0.195431
Dpf3	0.674857	1.54817	-2.19891	0.0598615	0.664453	-2.19891	-2.19891	0.46094	-0.669547	2.68536	0.0173032	0.195431
Cryzl2	-1.33989	-2.24886	-1.83246	-0.659746	-1.62091	-5.13477	-1.03415	-3.4408	-0.130861	2.6117	0.0173501	0.19586
Plxnd1	1.65435	1.44198	0	3.05472	2.25313	0	0	0	-0.852875	3.73605	0.0173999	0.196171
Pkdcc	-1.7167	-1.67887	-3.11155	-0.853207	-1.53366	1.98347	-0.807999	-0.602518	-0.592817	2.61016	0.0174081	0.196171
LOC118568699	1.6446	-1.64215	-0.710154	0.50539	0.00838624	-2.57742	-1.49426	1.19705	-0.521159	3.21402	0.0174129	0.196171
Gm32316	-2.15421	-1.2331	-5.24558	-1.32934	-0.867873	-0.173092	-1.30736	-5.24558	-0.0384992	2.64212	0.0174137	0.196171
Gm13501	2.21608	1.62799	0	2.24155	0	0	0	0	-0.892521	2.89671	0.0174439	0.196349
Pcdhb19	-1.89899	-0.519468	-1.049	0.859371	-0.671603	-2.91998	-1.50669	-2.91998	-0.695744	3.10215	0.0174506	0.196349
LOC100861749	-2.15659	-0.378548	-2.15659	-1.0877	1.02447	-2.15659	-2.15659	0.341577	-0.809133	2.73185	0.0174758	0.196349
Jhy	2.85263	2.03402	0	2.48112	0	0	2.29074	1.48586	-0.827929	2.73161	0.0174842	0.196349
Pus1	0.988877	-0.99742	-2.23179	2.23696	-0.347702	-1.56983	1.23616	0.789199	0.437305	2.58177	0.0174882	0.196349
Zbtb18	-0.319469	-0.855242	-1.61501	-0.395541	-1.40735	-7.37994	-2.15646	-5.50474	1.58463	2.60797	0.0174903	0.196349
Specc1l	-1.7816	-1.18392	-6.05219	-2.27722	-0.512329	-1.32538	-3.81724	0.051521	0.538378	2.60773	0.0174996	0.196349
Pdgfb	1.70288	1.07688	1.06687	-0.560743	1.27321	-2.842	-2.842	2.16895	-0.198179	2.63973	0.0175014	0.196349
Tmem164	-0.401019	-2.13007	-2.75604	-0.213451	-0.263462	-3.53399	-2.16825	-3.01534	0.623599	2.58102	0.0175172	0.196425
Oas1a	0.532655	0.00329207	-2.77651	1.18094	1.09817	-2.77651	-2.77651	-0.531168	-0.529268	2.67891	0.0175306	0.196475
Chrna2	-3.11518	-1.48258	-3.11518	0.618315	-2.09073	-3.11518	-0.119645	-3.11518	-0.693312	2.72868	0.0175836	0.196878
Smurf2	-2.113	0.16175	-1.37865	-0.0010781	0.710411	-0.717209	0.493723	-3.24584	-0.516119	2.60542	0.0175867	0.196878
Plekhm3	-0.400681	-1.09029	-0.280198	-1.0518	-0.787166	-4.78385	-2.09453	-4.78385	-0.170552	2.63722	0.0175937	0.196878
Zc3h12c	-1.92941	-1.28856	-3.06339	-0.695722	0.325621	-3.06339	-1.05512	-3.06339	-0.755419	2.67559	0.0176491	0.197228
Kdm4b	-1.01137	-1.8665	-6.01188	-1.98622	-1.06034	-6.01188	-4.60184	0.294584	0.474817	2.63556	0.0176548	0.197228
Efcc1	-2.54638	0.233798	-2.54638	0.831158	0.17219	-0.0173538	-1.46298	2.05911	-0.538813	2.63555	0.0176553	0.197228
Nptx2	0.619977	-1.60053	-0.668665	1.75892	1.00054	-2.53428	0.151379	1.21345	-0.438574	2.60321	0.0176709	0.197228
Pdzd4	2.10618	2.3706	3.69626	1.75025	0.978074	-0.979305	1.62772	-0.979305	-0.577939	2.63505	0.0176739	0.197228
Gm7575	-2.95908	-0.924229	-2.95908	-1.58865	-2.95908	-2.95908	-1.06052	-2.95908	-0.852697	3.62094	0.0176866	0.197228
Prrxl1	-2.54924	-2.54924	-2.54924	-1.62952	-2.54924	-2.54924	-2.54924	-2.54924	-0.937265	3.03005	0.0176917	0.197228
Pdzrn3	-0.127379	-0.772786	-2.79988	-1.57707	0.686461	-2.79988	0.266055	-1.31629	-0.708081	2.86068	0.0177171	0.197228
Il17rc	-1.11195	-2.47264	-2.47264	-2.47264	-1.33237	-2.47264	-1.38299	0.422246	-0.852778	2.72461	0.0177232	0.197228
Sema3g	-2.8102	-1.21562	-2.8102	-1.33687	-2.8102	-2.8102	-1.72022	-2.8102	-0.875304	2.81834	0.0177607	0.197228
Gm34538	0.38386	1.12489	-1.72572	-1.72572	-1.72572	-1.72572	-1.72572	1.41829	-0.780286	2.79123	0.0177673	0.197228
Wdr70	0.750975	-0.684524	-0.778056	-1.12416	1.15088	-6.03462	0.733651	0.272839	1.38343	2.60007	0.0177908	0.197228
Ankrd45	-0.975332	-2.74637	-5.74339	0.748403	-0.516767	-5.74339	-0.0963907	-0.236747	0.729593	2.63128	0.0178142	0.197228
Il1rn	2.05194	0.576825	-1.45762	-0.875181	-1.45762	-1.45762	-1.45762	-1.45762	-0.840601	3.0958	0.0178313	0.197228
Dstyk	-0.151209	-0.35521	-2.58752	-0.513509	0.748719	0.71264	-2.58752	-2.58752	-0.741955	2.6704	0.017836	0.197228
Pth2r	1.36072	2.40971	0	1.83574	0	0	2.70194	1.60865	-0.851055	2.72061	0.0178617	0.197228
Tysnd1	0	1.78127	0	0.920194	2.68049	0	1.64291	1.69007	-0.892545	2.75479	0.0179044	0.197228
Pcmtd1	0.972226	1.34038	1.68479	0.598823	1.7784	-1.93497	0.865336	-1.93728	0.991947	2.57093	0.0179119	0.197228
Gm36338	0.495347	-0.97914	-2.42089	-1.46619	-2.42089	-2.42089	-0.129737	-2.42089	-0.843572	2.71904	0.0179162	0.197228
Tshz1	0.441617	-0.824702	-3.60841	-0.211602	-1.13462	-0.142341	-2.24095	-3.86003	0.439654	2.56995	0.0179506	0.197228
Suv39h2	0.169768	-0.391382	-3.28194	-0.124421	1.1283	2.55566	0.416352	-1.8013	-0.233374	2.5951	0.0179827	0.197228
Zfp553	1.206	0.566909	-0.87587	1.74275	-0.87587	-0.87587	0.214235	-0.87587	-0.88333	3.6773	0.0180511	0.197228
Gm4952	0.153905	-0.981009	-0.981009	-0.397491	-0.981009	-0.981009	1.7231	0.505886	-0.916369	3.20638	0.0180692	0.197228
Apmap	-0.0254308	-1.95545	-6.22661	-0.29867	-0.876146	-3.3984	-0.240301	-1.10151	0.906443	2.59238	0.0180885	0.197228
Htr5a	-2.29017	-1.6209	-0.929906	-3.01317	-1.98649	-1.70207	-1.38157	-2.606	-0.574862	2.56645	0.0180897	0.197228
Inf2	0.780856	-0.36972	-1.84506	-2.10387	0.431875	-3.70914	0.620475	-3.70914	-0.345947	2.62378	0.0180966	0.197228
Gga3	0.812878	-1.00331	-1.45471	0.781341	-1.47249	-5.93328	0.219447	-0.41131	1.13139	2.59155	0.018121	0.197228
Sytl5	0.844474	-0.884501	0.527172	-1.11626	-3.16298	-4.30622	1.25464	-2.81827	0.0268861	2.59098	0.0181432	0.197228
Ythdf3	0.938985	-0.0375389	0.207388	0.364485	-0.528518	-7.82037	-0.84756	0.264642	2.9052	2.59071	0.0181539	0.197228
Pik3r4	0.847838	-1.25959	0.0520543	-1.31046	-1.3724	-4.23187	-0.982982	-1.88213	-0.209425	2.59039	0.0181662	0.197228
Adgrg5	-2.85066	-2.85066	-2.85066	-1.93073	-2.85066	-2.85066	-2.85066	-2.85066	-0.917664	3.01288	0.018167	0.197228
Ralgds	-0.425689	-2.2167	-7.61965	-1.91045	-1.76322	-2.08249	-1.24499	0.374268	1.86781	2.58889	0.0182251	0.197228
Dusp9	-0.876307	0.905846	-0.876307	1.26295	1.30528	-0.876307	-0.876307	-0.876307	-0.917915	2.7768	0.0182454	0.197228
Mavs	-1.33955	-1.28691	0.784332	-1.37127	-1.02033	-4.87901	-3.06493	-2.6183	-0.108324	2.58733	0.0182863	0.197228
Gm46027	-2.24231	-0.719205	-3.26227	-0.828279	-0.951929	-0.731241	0.689866	-1.00159	-0.62655	2.58719	0.018292	0.197228
Gm22252	-1.45314	0.264993	-0.939168	-2.81977	-2.84498	-0.0143231	-0.192083	-0.271973	-0.686762	2.58663	0.0183139	0.197228
Gm22449	-1.45314	0.264993	-0.939168	-2.81977	-2.84498	-0.0143231	-0.192083	-0.271973	-0.686762	2.58663	0.0183139	0.197228
Gm22511	-1.45314	0.264993	-0.939168	-2.81977	-2.84498	-0.0143231	-0.192083	-0.271973	-0.686762	2.58663	0.0183139	0.197228
Gm22524	-1.45314	0.264993	-0.939168	-2.81977	-2.84498	-0.0143231	-0.192083	-0.271973	-0.686762	2.58663	0.0183139	0.197228
Gm22627	-1.45314	0.264993	-0.939168	-2.81977	-2.84498	-0.0143231	-0.192083	-0.271973	-0.686762	2.58663	0.0183139	0.197228
Gm22630	-1.45314	0.264993	-0.939168	-2.81977	-2.84498	-0.0143231	-0.192083	-0.271973	-0.686762	2.58663	0.0183139	0.197228
Gm22632	-1.45314	0.264993	-0.939168	-2.81977	-2.84498	-0.0143231	-0.192083	-0.271973	-0.686762	2.58663	0.0183139	0.197228
Gm22909	-1.45314	0.264993	-0.939168	-2.81977	-2.84498	-0.0143231	-0.192083	-0.271973	-0.686762	2.58663	0.0183139	0.197228
Gm22912	-1.45314	0.264993	-0.939168	-2.81977	-2.84498	-0.0143231	-0.192083	-0.271973	-0.686762	2.58663	0.0183139	0.197228
Gm22996	-1.45314	0.264993	-0.939168	-2.81977	-2.84498	-0.0143231	-0.192083	-0.271973	-0.686762	2.58663	0.0183139	0.197228
Gm23356	-1.45314	0.264993	-0.939168	-2.81977	-2.84498	-0.0143231	-0.192083	-0.271973	-0.686762	2.58663	0.0183139	0.197228
Gm23560	-1.45314	0.264993	-0.939168	-2.81977	-2.84498	-0.0143231	-0.192083	-0.271973	-0.686762	2.58663	0.0183139	0.197228
Gm23575	-1.45314	0.264993	-0.939168	-2.81977	-2.84498	-0.0143231	-0.192083	-0.271973	-0.686762	2.58663	0.0183139	0.197228
Gm23922	-1.45314	0.264993	-0.939168	-2.81977	-2.84498	-0.0143231	-0.192083	-0.271973	-0.686762	2.58663	0.0183139	0.197228
[truncated: 19,822 more rows]

## Sheet: BioDare Rhythmicity
Experiment ID	21888
Experiment name	Hamster_DMH
Job	4e23d36d-a45f-46c4-8ade-f213ab8a987f
Method	BD2 eJTK
Submitted	2022-03-09T11:51:14.632320930	Finished	2022-03-09T11:52:18.562208024
NULL_SIZE	100000
DW_END	0
PERIOD_MIN	18
DATA_SET_ID	21888_NO_DTR
PERIOD_MAX	35
DW_START	0
PRESET	BD2_CLASSIC
METHOD	BD2EJTK
DATA_SET_TYPE_NAME	no dtr
PARAMS_SUMMARY	no dtr min-max p(18.0-35.0)
DATA_SET_TYPE	NO_DTR
Individual Results
Data Id	Data Label		tau	emp p	emp p BH Corrected	Pattern Shape	Pattern Period	Pattern Peak	P. Trough	P. Circ. Peak	P. Circ. Trough	P. Width	P. Asym		JTK p from tau	JTK p BH Corrected	bf corrected JTK p	BH bf corrected p
111	Adamtsl5		0.552052	1e-05	0.00110344	SPIKE	24	12	0	12	0	8	0.5		1.89e-09	2.63e-07	5.69e-06	0.000792
269	BB287469		0.578881	1e-05	0.00110344	SPIKE	18	0	9	0	12	3	0.5		3.2e-10	1.03e-07	9.65e-07	0.000309
509	Chrna10		0.552052	1e-05	0.00110344	SPIKE	32	24	8	18	6	8	0.5		1.89e-09	2.63e-07	5.69e-06	0.000792
668	Ddo		0.566667	1e-05	0.00110344	SPIKE	24	0	12	0	12	4	0.5		7.26e-10	1.79e-07	2.19e-06	0.000538
729	Dpp4		0.578881	1e-05	0.00110344	SPIKE	18	0	9	0	12	3	0.5		3.2e-10	1.03e-07	9.65e-07	0.000309
875	Fbxo27		0.540624	1e-05	0.00110344	SPIKE	30	0	13.12	0	10.5	7.5	0.75		3.93e-09	4.83e-07	1.18e-05	0.00145579
922	Foxg1		0.552052	1e-05	0.00110344	SPIKE	18	0	9	0	12	3	0.5		1.89e-09	2.63e-07	5.69e-06	0.000792
1024	Gm18152		0.562459	1e-05	0.00110344	SPIKE	32	24	8	18	6	8	0.5		9.58e-10	2.16e-07	2.89e-06	0.00065
1026	Gm18990		0.578881	1e-05	0.00110344	SPIKE	24	12	0	12	0	8	0.5		3.2e-10	1.03e-07	9.65e-07	0.000309
1150	Gm4027		0.679366	1e-05	0.00110344	SPIKE	18	0	9	0	12	3	0.5		2.04e-13	1.44e-10	6.15e-10	4.35e-07
1176	Gm4796		0.546787	1e-05	0.00110344	SPIKE	18	6	16.12	8	21.5	4.5	0.25		2.65e-09	3.39e-07	7.99e-06	0.00102241
1218	Gm8182		0.561638	1e-05	0.00110344	SPIKE	35	2.92	20.42	2	14	8.75	0.5		1.01e-09	2.16e-07	3.05e-06	0.00065
1309	Has3		0.552052	1e-05	0.00110344	SPIKE	24	12	0	12	0	8	0.5		1.89e-09	2.63e-07	5.69e-06	0.000792
1322	Helq		0.57067	1e-05	0.00110344	SPIKE	32	8	24	6	18	5.33	0.5		5.56e-10	1.48e-07	1.68e-06	0.000447
1359	Hunk		0.57067	1e-05	0.00110344	SPIKE	24	12	0	12	0	8	0.5		5.56e-10	1.48e-07	1.68e-06	0.000447
1385	Il12rb1		0.552052	1e-05	0.00110344	SPIKE	24	12	0	12	0	8	0.5		1.89e-09	2.63e-07	5.69e-06	0.000792
1785	Mybl1		0.552052	1e-05	0.00110344	SPIKE	18	0	9	0	12	3	0.5		1.89e-09	2.63e-07	5.69e-06	0.000792
1859	Ncapg2		0.679366	1e-05	0.00110344	SPIKE	32	24	8	18	6	8	0.5		2.04e-13	1.44e-10	6.15e-10	4.35e-07
1937	Nrn1l		0.536119	1e-05	0.00110344	SPIKE	24	2	12.5	2	12.5	6	0.75		5.22e-09	5.96e-07	1.57e-05	0.0017965
2078	Piezo1		0.679366	1e-05	0.00110344	SPIKE	32	24	8	18	6	8	0.5		2.04e-13	1.44e-10	6.15e-10	4.35e-07
2207	Ptgs2		0.578881	1e-05	0.00110344	SPIKE	18	0	9	0	12	3	0.5		3.2e-10	1.03e-07	9.65e-07	0.000309
2258	Rasgrp1		0.534296	1e-05	0.00110344	SPIKE	25	0	10.94	0	10.5	6.25	0.75		5.85e-09	6.45e-07	1.76e-05	0.00194473
2376	S100a7a		0.678097	1e-05	0.00110344	SPIKE	32	24	8	18	6	8	0.5		2.26e-13	1.44e-10	6.8e-10	4.35e-07
2404	Sec22c		0.548523	1e-05	0.00110344	SPIKE	24	2	12.5	2	12.5	6	0.75		2.37e-09	3.16e-07	7.15e-06	0.000953
2439	Sgk2		0.552052	1e-05	0.00110344	SPIKE	32	16	0	12	0	8	0.5		1.89e-09	2.63e-07	5.69e-06	0.000792
2794	Tmem232		0.578881	1e-05	0.00110344	SPIKE	32	24	8	18	6	8	0.5		3.2e-10	1.03e-07	9.65e-07	0.000309
2824	Tpbg		0.53736	1e-05	0.00110344	SPIKE	35	0	19.69	0	13.5	8.75	0.25		4.83e-09	5.72e-07	1.45e-05	0.00172306
2832	Traf3ip3		0.679366	1e-05	0.00110344	SPIKE	32	8	24	6	18	5.33	0.5		2.04e-13	1.44e-10	6.15e-10	4.35e-07
2855	Trim54		0.552052	1e-05	0.00110344	SPIKE	18	0	9	0	12	3	0.5		1.89e-09	2.63e-07	5.69e-06	0.000792
1023	Gm17822		0.526195	2e-05	0.00199998	SPIKE	24	0	12	0	12	4	0.5		9.68e-09	9.68e-07	2.92e-05	0.00291744
1718	Mical2		0.529866	2e-05	0.00199998	SPIKE	24	0	12	0	12	4	0.5		7.71e-09	8.23e-07	2.32e-05	0.00247886
1924	Nppa		0.526576	2e-05	0.00199998	SPIKE	35	0	19.69	0	13.5	8.75	0.25		9.46e-09	9.68e-07	2.85e-05	0.00291744
103	Adamts15		0.521387	3e-05	0.00259457	SPIKE	24	0	12	0	12	4	0.5		1.3e-08	1.13e-06	3.92e-05	0.00339135
1131	Gm34978		0.524891	3e-05	0.00259457	SPIKE	19	7.92	16.23	10	20.5	4.75	0.75		1.05e-08	1.02e-06	3.16e-05	0.00306617
1554	Lepr		0.521387	3e-05	0.00259457	SPIKE	28	0	14	0	12	7	0.5		1.3e-08	1.13e-06	3.92e-05	0.00339135
2349	Rps6ka4		0.521537	3e-05	0.00259457	SPIKE	25	0	10.94	0	10.5	6.25	0.75		1.29e-08	1.13e-06	3.89e-05	0.00339135
2504	Slc26a1		0.521632	3e-05	0.00259457	SPIKE	23	3.83	15.33	4	16	3.83	0.5		1.28e-08	1.13e-06	3.86e-05	0.00339135
2595	Socs6		0.519684	4e-05	0.00328202	SPIKE	24	12	0	12	0	8	0.5		1.44e-08	1.22e-06	4.35e-05	0.00366444
2850	Trim34b		0.519154	4e-05	0.00328202	SPIKE	25	0	12.5	0	12	6.25	0.5		1.49e-08	1.22e-06	4.49e-05	0.00368797
337	Calcoco2		0.510688	6e-05	0.00391833	SPIKE	18	0	9	0	12	3	0.5		2.49e-08	1.73e-06	7.5e-05	0.00521135
402	Ccng2		0.513569	6e-05	0.00391833	SPIKE	22	0	12.38	0	13.5	5.5	0.25		2.09e-08	1.57e-06	6.31e-05	0.00472579
425	Cdc25b		0.506799	6e-05	0.00391833	SPIKE	18	6	16.12	8	21.5	4.5	0.25		3.14e-08	2.05e-06	9.47e-05	0.00618327
789	Enpp6		0.510901	6e-05	0.00391833	SPIKE	31	25.83	8.4	20	6.5	7.75	0.75		2.46e-08	1.73e-06	7.41e-05	0.00521135
1025	Gm18902		0.512639	6e-05	0.00391833	SPIKE	22	0	12.38	0	13.5	5.5	0.25		2.21e-08	1.61e-06	6.67e-05	0.00485215
1230	Gm9224		0.509229	6e-05	0.00391833	SPIKE	18	4.5	13.5	6	18	3	0.5		2.72e-08	1.81e-06	8.19e-05	0.00545912
1460	Kcnh3		0.510355	6e-05	0.00391833	SPIKE	24	0	12	0	12	4	0.5		2.54e-08	1.73e-06	7.65e-05	0.00521135
1479	Kctd12		0.513458	6e-05	0.00391833	SPIKE	29	12.08	24.77	10	20.5	7.25	0.75		2.11e-08	1.57e-06	6.35e-05	0.00472579
2343	Rpl7a-ps9		0.514831	6e-05	0.00391833	SPIKE	30	15	28.12	12	22.5	7.5	0.75		1.94e-08	1.55e-06	5.84e-05	0.00467549
2858	Trim62		0.514351	6e-05	0.00391833	SPIKE	24	0	12	0	12	4	0.5		2e-08	1.56e-06	6.02e-05	0.00469595
831	Faap24		0.500613	7e-05	0.00439211	SPIKE	24	12	0	12	0	8	0.5		4.53e-08	2.84e-06	0.000137	0.00857197
1731	Mmgt2		0.501848	7e-05	0.00439211	SPIKE	18	4.5	13.5	6	18	3	0.5		4.22e-08	2.7e-06	0.000127	0.00812892
1037	Gm21319		0.50008	9e-05	0.00543391	SPIKE	19	15.83	7.52	20	9.5	4.75	0.25		4.68e-08	2.88e-06	0.000141	0.00867558
1267	Gprin3		0.497374	9e-05	0.00543391	SPIKE	25	0	10.94	0	10.5	6.25	0.75		5.48e-08	3.31e-06	0.000165	0.00997758
1515	Klhl33		0.496092	0.00012	0.00711104	SPIKE	31	25.83	8.4	20	6.5	7.75	0.75		5.91e-08	3.5e-06	0.000178	0.0105556
795	Epb41l5		0.494468	0.00014	0.00785957	SPIKE	24	12	0	12	0	8	0.5		6.5e-08	3.71e-06	0.000196	0.0111902
881	Fbxw4		0.493852	0.00014	0.00785957	SPIKE	32	16	0	12	0	8	0.5		6.74e-08	3.78e-06	0.000203	0.0113953
1233	Gm9278		0.494468	0.00014	0.00785957	SPIKE	18	4.5	13.5	6	18	3	0.5		6.5e-08	3.71e-06	0.000196	0.0111902
485	Cfap20dc		0.491966	0.00015	0.00813551	SPIKE	35	0	19.69	0	13.5	8.75	0.25		7.52e-08	4.08e-06	0.000226	0.0122839
1427	Itgb2		0.492447	0.00015	0.00813551	SPIKE	24	0	12	0	12	4	0.5		7.31e-08	4.03e-06	0.00022	0.0121514
390	Ccdc61		0.485049	0.0002	0.00984605	SPIKE	27	0	11.81	0	10.5	6.75	0.75		1.12e-07	5.6e-06	0.000337	0.0168659
1036	Gm2075		0.487088	0.0002	0.00984605	SPIKE	18	0	9	0	12	3	0.5		9.96e-08	5.06e-06	0.0003	0.0152437
1178	Gm4841		0.487088	0.0002	0.00984605	SPIKE	18	0	9	0	12	3	0.5		9.96e-08	5.06e-06	0.0003	0.0152437
1621	Lrrc18		0.487088	0.0002	0.00984605	SPIKE	32	8	24	6	18	5.33	0.5		9.96e-08	5.06e-06	0.0003	0.0152437
2386	Sash3		0.487088	0.0002	0.00984605	SPIKE	31	25.83	8.4	20	6.5	7.75	0.75		9.96e-08	5.06e-06	0.0003	0.0152437
2406	Secisbp2		0.484764	0.0002	0.00984605	SPIKE	24	0	12	0	12	4	0.5		1.14e-07	5.6e-06	0.000343	0.01688
2145	Pomt2		0.482904	0.00022	0.0105074	SPIKE	25	0	12.5	0	12	6.25	0.5		1.27e-07	6.04e-06	0.000381	0.0182099
2205	Ptgis		0.483611	0.00022	0.0105074	SPIKE	26	23.83	10.83	22	10	6.5	0.5		1.22e-07	5.89e-06	0.000366	0.017756
554	Cntnap5c		0.481283	0.00024	0.0106666	SPIKE	18	0	9	0	12	3	0.5		1.39e-07	6.44e-06	0.000418	0.0193898
1887	Neu4		0.478736	0.00024	0.0106666	SPIKE	18	7.5	15.38	10	20.5	4.5	0.75		1.6e-07	7.12e-06	0.000483	0.021467
2187	Proser3		0.481542	0.00024	0.0106666	SPIKE	32	24	8	18	6	8	0.5		1.37e-07	6.43e-06	0.000412	0.0193877
2825	Tpcn2		0.479708	0.00024	0.0106666	SPIKE	31	25.83	8.4	20	6.5	7.75	0.75		1.52e-07	6.84e-06	0.000457	0.0206047
2987	Vstm5		0.479708	0.00024	0.0106666	SPIKE	18	0	9	0	12	3	0.5		1.52e-07	6.84e-06	0.000457	0.0206047
618	Cycs-ps1		0.476874	0.00027	0.0118355	SPIKE	18	7.5	15.38	10	20.5	4.5	0.75		1.78e-07	7.81e-06	0.000537	0.0235183
2284	Reep4		0.472328	0.00038	0.0164323	SPIKE	30	22.5	7.5	18	6	5	0.5		2.3e-07	9.94e-06	0.000692	0.0299346
151	Aloxe3		0.470666	0.00043	0.0181051	SPIKE	35	2.92	20.42	2	14	11.67	0.5		2.52e-07	1.08e-05	0.000759	0.0324006
2112	Plekhg3		0.470067	0.00043	0.0181051	SPIKE	27	0	11.81	0	10.5	6.75	0.75		2.61e-07	1.1e-05	0.000785	0.0330572
97	Acy3		0.468141	0.00048	0.0196921	SPIKE	32	8	24	6	18	5.33	0.5		2.9e-07	1.19e-05	0.000874	0.0358407
1756	Mrgpre		0.468297	0.00048	0.0196921	SPIKE	24	2	12.5	2	12.5	6	0.75		2.87e-07	1.19e-05	0.000866	0.0358407
1209	Gm7445		0.467239	0.0005	0.0197529	SPIKE	24	12	0	12	0	8	0.5		3.05e-07	1.21e-05	0.000918	0.0363506
1863	Ncln		0.467336	0.00049	0.0197529	SPIKE	25	0	10.94	0	10.5	6.25	0.75		3.03e-07	1.21e-05	0.000913	0.0363506
2792	Tmem214		0.467203	0.0005	0.0197529	SPIKE	24	2	12.5	2	12.5	6	0.75		3.05e-07	1.21e-05	0.00092	0.0363506
14	2210408F21Rik		0.465567	0.00053	0.0206827	SPIKE	18	0	9	0	12	3	0.5		3.34e-07	1.29e-05	0.00100701	0.0389681
1002	Gm13501		0.464948	0.00057	0.0213331	SPIKE	30	22.5	7.5	18	6	5	0.5		3.46e-07	1.29e-05	0.00104191	0.0389681
1074	Gm25106		0.464948	0.00057	0.0213331	SPIKE	24	14	0.5	14	0.5	6	0.75		3.46e-07	1.29e-05	0.00104191	0.0389681
1238	Gm9845		0.464644	0.00058	0.0213331	SPIKE	30	0	13.12	0	10.5	7.5	0.75		3.52e-07	1.29e-05	0.00105945	0.0389681
1890	Nfam1		0.464948	0.00057	0.0213331	SPIKE	30	22.5	7.5	18	6	5	0.5		3.46e-07	1.29e-05	0.00104191	0.0389681
2839	Trdn		0.464644	0.00058	0.0213331	SPIKE	25	0	10.94	0	10.5	6.25	0.75		3.52e-07	1.29e-05	0.00105945	0.0389681
454	Cebpb		0.461685	0.00067	0.0218773	SPIKE	24	16	2.5	16	2.5	6	0.75		4.14e-07	1.35e-05	0.00124597	0.0406847
916	Fndc3b		0.462621	0.00063	0.0218773	SPIKE	30	25	11.88	20	9.5	7.5	0.25		3.93e-07	1.35e-05	0.00118378	0.0406847
978	Gli2		0.461685	0.00067	0.0218773	SPIKE	18	10.5	1.5	14	2	4.5	0.5		4.14e-07	1.35e-05	0.00124597	0.0406847
1089	Gm2622		0.461685	0.00067	0.0218773	SPIKE	30	0	13.12	0	10.5	7.5	0.75		4.14e-07	1.35e-05	0.00124597	0.0406847
1098	Gm27162		0.461685	0.00067	0.0218773	SPIKE	23	3.83	15.33	4	16	3.83	0.5		4.14e-07	1.35e-05	0.00124597	0.0406847
1113	Gm32432		0.461685	0.00067	0.0218773	SPIKE	23	3.83	15.33	4	16	3.83	0.5		4.14e-07	1.35e-05	0.00124597	0.0406847
1210	Gm7575		0.462394	0.00063	0.0218773	SPIKE	22	0	12.38	0	13.5	5.5	0.25		3.98e-07	1.35e-05	0.00119859	0.0406847
1685	Mctp2		0.461685	0.00067	0.0218773	SPIKE	32	24	10	18	7.5	8	0.25		4.14e-07	1.35e-05	0.00124597	0.0406847
2098	Pla2g3		0.461685	0.00067	0.0218773	SPIKE	30	0	13.12	0	10.5	7.5	0.75		4.14e-07	1.35e-05	0.00124597	0.0406847
2368	Rttn		0.461685	0.00067	0.0218773	SPIKE	22	3.67	14.67	4	16	3.67	0.5		4.14e-07	1.35e-05	0.00124597	0.0406847
2695	Tas1r1		0.461685	0.00067	0.0218773	SPIKE	34	28.33	9.21	20	6.5	8.5	0.75		4.14e-07	1.35e-05	0.00124597	0.0406847
299	Brdt		0.460044	0.0007	0.0223998	SPIKE	18	12	1.88	16	2.5	4.5	0.75		4.52e-07	1.45e-05	0.00136265	0.0436047
1469	Kcnk13		0.460044	0.0007	0.0223998	SPIKE	32	24	10	18	7.5	8	0.25		4.52e-07	1.45e-05	0.00136265	0.0436047
357	Casp6		0.458917	0.00072	0.022588	SPIKE	21	3.5	12.69	4	14.5	5.25	0.75		4.81e-07	1.52e-05	0.0014488	0.0456658
469	Cep131		0.45883	0.00072	0.022588	SPIKE	32	5.33	19.33	4	14.5	8	0.75		4.83e-07	1.52e-05	0.0014556	0.0456658
2613	Spi1		0.457425	0.00073	0.0226794	SPIKE	28	0	12.25	0	10.5	7	0.75		5.21e-07	1.61e-05	0.00157092	0.0486037
1806	Myo5b		0.457244	0.00076	0.0233844	SPIKE	18	0	7.88	0	10.5	4.5	0.75		5.27e-07	1.61e-05	0.00158637	0.0486037
2799	Tmem270		0.456971	0.00078	0.0235469	SPIKE	18	7.5	15.38	10	20.5	4.5	0.75		5.34e-07	1.61e-05	0.00161	0.0486037
3194	Zscan20		0.457	0.00078	0.0235469	SPIKE	18	0	9	0	12	3	0.5		5.34e-07	1.61e-05	0.00160747	0.0486037
662	Dcun1d2		0.455746	0.00081	0.0242241	SPIKE	24	2	12.5	2	12.5	6	0.75		5.71e-07	1.65e-05	0.00172017	0.0497382
113	Adcy4		0.454794	0.0009	0.0243303	SPIKE	35	0	19.69	0	13.5	8.75	0.25		6.01e-07	1.65e-05	0.00181083	0.0497382
423	Cdan1		0.455511	0.00085	0.0243303	SPIKE	22	3.67	14.67	4	16	5.5	0.5		5.78e-07	1.65e-05	0.00174215	0.0497382
1578	LOC102638047		0.454794	0.0009	0.0243303	SPIKE	25	0	10.94	0	10.5	6.25	0.75		6.01e-07	1.65e-05	0.00181083	0.0497382
1602	LOC118568756		0.453371	0.00092	0.0243303	SPIKE	24	2	12.5	2	12.5	6	0.75		6.49e-07	1.74e-05	0.00195492	0.0525694
1605	Lpl		0.453138	0.00092	0.0243303	SPIKE	18	0	9	0	12	3	0.5		6.57e-07	1.75e-05	0.00197951	0.052787
1749	Mpl		0.454794	0.0009	0.0243303	SPIKE	26	23.83	10.83	22	10	6.5	0.5		6.01e-07	1.65e-05	0.00181083	0.0497382
1810	Myot		0.454794	0.0009	0.0243303	SPIKE	19	6.33	14.65	8	18.5	4.75	0.75		6.01e-07	1.65e-05	0.00181083	0.0497382
1938	Nrros		0.454794	0.0009	0.0243303	SPIKE	30	0	13.12	0	10.5	7.5	0.75		6.01e-07	1.65e-05	0.00181083	0.0497382
1939	Nsmaf		0.454715	0.0009	0.0243303	SPIKE	23	1.92	13.42	2	14	5.75	0.5		6.04e-07	1.65e-05	0.00181855	0.0497382
1955	Nxpe2		0.454794	0.0009	0.0243303	SPIKE	22	3.67	14.67	4	16	3.67	0.5		6.01e-07	1.65e-05	0.00181083	0.0497382
2071	Phf21b		0.454794	0.0009	0.0243303	SPIKE	29	12.08	24.77	10	20.5	7.25	0.75		6.01e-07	1.65e-05	0.00181083	0.0497382
2238	Rac2		0.453794	0.00092	0.0243303	SPIKE	25	0	10.94	0	10.5	6.25	0.75		6.34e-07	1.72e-05	0.00191101	0.051824
2311	Rimbp3		0.455511	0.00085	0.0243303	SPIKE	19	7.92	16.23	10	20.5	4.75	0.75		5.78e-07	1.65e-05	0.00174215	0.0497382
3016	Wiz		0.452936	0.00092	0.0243303	SPIKE	18	0	9	0	12	3	0.5		6.64e-07	1.76e-05	0.00200112	0.0529221
27	4930503B20Rik		0.452381	0.00096	0.0244146	SPIKE	30	15	28.12	12	22.5	7.5	0.75		6.84e-07	1.78e-05	0.00206158	0.0536347
578	Cpm		0.449513	0.00102999	0.0244146	SPIKE	32	24	8	18	6	8	0.5		7.98e-07	1.91e-05	0.00240316	0.0574343
600	Csrp3		0.450819	0.00098	0.0244146	SPIKE	33	11	25.44	8	18.5	8.25	0.75		7.44e-07	1.9e-05	0.00224138	0.0573794
646	Dbf4		0.449359	0.00102999	0.0244146	SPIKE	20	5	13.75	6	16.5	5	0.75		8.04e-07	1.91e-05	0.00242301	0.0574343
937	Fxyd5		0.449359	0.00102999	0.0244146	SPIKE	24	0	12	0	12	4	0.5		8.04e-07	1.91e-05	0.00242301	0.0574343
938	Fyb		0.449359	0.00102999	0.0244146	SPIKE	24	2	12.5	2	12.5	6	0.75		8.04e-07	1.91e-05	0.00242301	0.0574343
1593	LOC118567992		0.452757	0.00096	0.0244146	SPIKE	32	0	14	0	10.5	8	0.75		6.71e-07	1.76e-05	0.0020204	0.052994
1719	Micall2		0.450843	0.00098	0.0244146	SPIKE	32	26.67	8.67	20	6.5	8	0.75		7.43e-07	1.9e-05	0.0022385	0.0573794
1740	Morc4		0.449359	0.00102999	0.0244146	SPIKE	24	0	12	0	12	4	0.5		8.04e-07	1.91e-05	0.00242301	0.0574343
2119	Plk3		0.45023	0.001	0.0244146	SPIKE	32	24	8	18	6	8	0.5		7.68e-07	1.91e-05	0.00231302	0.0574343
2124	Plscr1		0.449513	0.00102999	0.0244146	SPIKE	32	16	0	12	0	8	0.5		7.98e-07	1.91e-05	0.00240316	0.0574343
2331	Rnf213		0.449359	0.00102999	0.0244146	SPIKE	24	0	12	0	12	4	0.5		8.04e-07	1.91e-05	0.00242301	0.0574343
2676	Sytl3		0.449359	0.00102999	0.0244146	SPIKE	20	5	13.75	6	16.5	5	0.75		8.04e-07	1.91e-05	0.00242301	0.0574343
2880	Trpc7		0.45023	0.001	0.0244146	SPIKE	32	24	8	18	6	8	0.5		7.68e-07	1.91e-05	0.00231302	0.0574343
534	Clvs1		0.448879	0.00103999	0.0244703	SPIKE	26	23.83	10.83	22	10	6.5	0.5		8.25e-07	1.94e-05	0.0024857	0.058487
334	Cadps2		0.447676	0.00107999	0.0245104	SPIKE	28	0	14	0	12	7	0.5		8.79e-07	2e-05	0.00264979	0.0601371
1142	Gm38581		0.447903	0.00107999	0.0245104	SPIKE	18	6	16.12	8	21.5	4.5	0.25		8.69e-07	1.99e-05	0.00261805	0.0598412
1349	Hps5		0.448168	0.00105999	0.0245104	SPIKE	32	24	8	18	6	8	0.5		8.57e-07	1.99e-05	0.00258145	0.0598412
1985	Osmr		0.447903	0.00107999	0.0245104	SPIKE	32	26.67	8.67	20	6.5	8	0.75		8.69e-07	1.99e-05	0.00261805	0.0598412
2988	Vsx2		0.447903	0.00107999	0.0245104	SPIKE	18	10.5	1.5	14	2	4.5	0.5		8.69e-07	1.99e-05	0.00261805	0.0598412
1212	Gm7707		0.446308	0.00111999	0.0250627	SPIKE	20	5	13.75	6	16.5	5	0.75		9.46e-07	2.12e-05	0.00284918	0.0637578
3160	Zfp800		0.4472	0.00111999	0.0250627	SPIKE	26	23.83	12.46	22	11.5	6.5	0.25		9.02e-07	2.03e-05	0.00271758	0.0612412
1540	Lat2		0.445435	0.00121999	0.0269239	SPIKE	24	2	12.5	2	12.5	6	0.75		9.9e-07	2.19e-05	0.00298376	0.0658485
2976	Virma		0.445741	0.00121999	0.0269239	SPIKE	24	0	12	0	12	4	0.5		9.74e-07	2.17e-05	0.00293591	0.0652424
1811	Myoz1		0.444976	0.00127999	0.0276754	SPIKE	30	15	28.12	12	22.5	7.5	0.75		1.01e-06	2.22e-05	0.00305706	0.0668923
2058	Pex6		0.444878	0.00127999	0.0276754	SPIKE	27	0	11.81	0	10.5	6.75	0.75		1.02e-06	2.22e-05	0.00307287	0.0668923
3188	Zmynd11		0.444344	0.00127999	0.0276754	SPIKE	25	0	10.94	0	10.5	6.25	0.75		1.05e-06	2.27e-05	0.00316073	0.0683401
36	6030458C11Rik		0.443302	0.00135999	0.0277195	SPIKE	24	0	12	0	12	4	0.5		1.11e-06	2.29e-05	0.00333911	0.0689338
396	Cchcr1		0.443459	0.00135999	0.0277195	SPIKE	18	0	9	0	12	3	0.5		1.1e-06	2.29e-05	0.00331151	0.0689338
1566	Lin28b		0.442857	0.00135999	0.0277195	SPIKE	24	2	12.5	2	12.5	6	0.75		1.13e-06	2.31e-05	0.00341806	0.0696676
2040	Pdia5		0.44318	0.00135999	0.0277195	SPIKE	30	27.5	12.5	22	10	7.5	0.5		1.12e-06	2.29e-05	0.00336052	0.0689338
2132	Pms1		0.444162	0.00133999	0.0277195	SPIKE	21	1.75	12.25	2	14	3.5	0.5		1.06e-06	2.27e-05	0.00319126	0.068537
2600	Sp110		0.443422	0.00135999	0.0277195	SPIKE	28	0	12.25	0	10.5	7	0.75		1.1e-06	2.29e-05	0.00331801	0.0689338
2622	Srpx		0.443459	0.00135999	0.0277195	SPIKE	24	12	0	12	0	8	0.5		1.1e-06	2.29e-05	0.00331151	0.0689338
2837	Trappc8		0.443524	0.00134999	0.0277195	SPIKE	32	26.67	8.67	20	6.5	8	0.75		1.1e-06	2.29e-05	0.00330025	0.0689338
2863	Trip13		0.443459	0.00135999	0.0277195	SPIKE	34	28.33	11.33	20	8	5.67	0.5		1.1e-06	2.29e-05	0.00331151	0.0689338
1389	Il17ra		0.442627	0.00136999	0.0277466	SPIKE	25	0	10.94	0	10.5	6.25	0.75		1.15e-06	2.33e-05	0.00345971	0.0700702
705	Dnah12		0.441612	0.00142999	0.0280733	SPIKE	22	3.67	14.67	4	16	3.67	0.5		1.21e-06	2.38e-05	0.00364898	0.0716365
858	Fanci		0.441846	0.00142999	0.0280733	SPIKE	26	0	14.62	0	13.5	6.5	0.25		1.2e-06	2.36e-05	0.00360448	0.0711997
964	Gemin7		0.442176	0.00140999	0.0280733	SPIKE	20	5	13.75	6	16.5	5	0.75		1.18e-06	2.36e-05	0.00354248	0.0711997
1127	Gm34110		0.441954	0.00142999	0.0280733	SPIKE	18	7.5	15.38	10	20.5	4.5	0.75		1.19e-06	2.36e-05	0.00358412	0.0711997
1220	Gm8241		0.441861	0.00142999	0.0280733	NSPIKE	28	19.25	7	16.5	6	21	0.25		1.2e-06	2.36e-05	0.00360168	0.0711997
2253	Rara		0.440931	0.00149998	0.029268	SPIKE	24	2	12.5	2	12.5	6	0.75		1.26e-06	2.45e-05	0.00378154	0.0737862
395	Ccdc92b		0.439697	0.00160998	0.0306664	SPIKE	20	6.67	15.42	8	18.5	5	0.75		1.34e-06	2.55e-05	0.00403342	0.0768269
1173	Gm46432		0.439697	0.00160998	0.0306664	SPIKE	24	2	12.5	2	12.5	6	0.75		1.34e-06	2.55e-05	0.00403342	0.0768269
1468	Kcnk12		0.439697	0.00160998	0.0306664	SPIKE	24	2	12.5	2	12.5	6	0.75		1.34e-06	2.55e-05	0.00403342	0.0768269
2665	Sult2b1		0.44031	0.00158998	0.0306664	SPIKE	25	0	10.94	0	10.5	6.25	0.75		1.3e-06	2.51e-05	0.0039063	0.0757586
64	Abi3bp		0.437291	0.00175998	0.0323675	SPIKE	22	0	12.38	0	13.5	5.5	0.25		1.52e-06	2.79e-05	0.00457209	0.0840844
1748	Mpeg1		0.438969	0.00170998	0.0323675	SPIKE	32	8	24	6	18	5.33	0.5		1.39e-06	2.63e-05	0.00418961	0.0793299
1792	Myh14		0.437733	0.00174998	0.0323675	SPIKE	18	0	9	0	12	3	0.5		1.48e-06	2.75e-05	0.00446823	0.0827741
2118	Plin5		0.438095	0.00174998	0.0323675	SPIKE	24	4	16	4	16	6	0.5		1.46e-06	2.74e-05	0.00438476	0.0825367
2893	Tspan11		0.437906	0.00174998	0.0323675	SPIKE	27	0	11.81	0	10.5	6.75	0.75		1.47e-06	2.75e-05	0.00442823	0.0827741
2960	Usp40		0.437704	0.00174998	0.0323675	SPIKE	21	3.5	14	4	16	5.25	0.5		1.49e-06	2.75e-05	0.00447498	0.0827741
56	Abcb4		0.436564	0.00182998	0.0328985	SPIKE	32	24	10	18	7.5	8	0.25		1.58e-06	2.83e-05	0.00474783	0.0853543
952	Gbgt1		0.436564	0.00182998	0.0328985	SPIKE	29	12.08	24.77	10	20.5	7.25	0.75		1.58e-06	2.83e-05	0.00474783	0.0853543
1167	Gm45935		0.436689	0.00182998	0.0328985	SPIKE	21	1.75	12.25	2	14	3.5	0.5		1.57e-06	2.83e-05	0.0047172	0.0853543
1708	Mfge8		0.436689	0.00182998	0.0328985	SPIKE	18	0	9	0	12	3	0.5		1.57e-06	2.83e-05	0.0047172	0.0853543
257	AW549877		0.436229	0.00190998	0.0339444	SPIKE	18	6	16.12	8	21.5	4.5	0.25		1.6e-06	2.87e-05	0.00483103	0.0863647
382	Ccdc15		0.435949	0.00191998	0.0339444	SPIKE	32	24	8	18	6	8	0.5		1.63e-06	2.88e-05	0.00490166	0.0866592
2107	Pld4		0.436093	0.00191998	0.0339444	SPIKE	24	2	12.5	2	12.5	6	0.75		1.61e-06	2.87e-05	0.00486514	0.0864914
50	Abca17		0.43404	0.00205998	0.0354405	SPIKE	18	0	9	0	12	3	0.5		1.8e-06	3.09e-05	0.00541026	0.0930798
586	Crispld2		0.43404	0.00205998	0.0354405	SPIKE	18	0	9	0	12	3	0.5		1.8e-06	3.09e-05	0.00541026	0.0930798
611	Cxcr4		0.43404	0.00205998	0.0354405	SPIKE	24	12	0	12	0	8	0.5		1.8e-06	3.09e-05	0.00541026	0.0930798
669	Ddr2		0.43404	0.00205998	0.0354405	SPIKE	32	24	8	18	6	8	0.5		1.8e-06	3.09e-05	0.00541026	0.0930798
1501	Kif9		0.43404	0.00205998	0.0354405	SPIKE	32	16	0	12	0	8	0.5		1.8e-06	3.09e-05	0.00541026	0.0930798
1441	Jcad		0.433065	0.00212998	0.0364488	SPIKE	22	0	12.38	0	13.5	5.5	0.25		1.89e-06	3.23e-05	0.00568906	0.0973529
54	Abcb10		0.430788	0.00230998	0.0381027	SPIKE	34	28.33	9.21	20	6.5	8.5	0.75		2.12e-06	3.5e-05	0.00639479	0.105481
158	Ankfn1		0.431174	0.00230998	0.0381027	SPIKE	18	7.5	15.38	10	20.5	4.5	0.75		2.08e-06	3.47e-05	0.00626936	0.104489
1300	H2-DMb2		0.43082	0.00230998	0.0381027	SPIKE	32	24	8	18	6	8	0.5		2.12e-06	3.5e-05	0.00638424	0.105481
1876	Neil1		0.431418	0.00230998	0.0381027	SPIKE	27	0	11.81	0	10.5	6.75	0.75		2.05e-06	3.47e-05	0.00619147	0.104489
2217	Ptprd		0.431788	0.00227998	0.0381027	SPIKE	24	0	12	0	12	4	0.5		2.02e-06	3.43e-05	0.0060749	0.103403
2578	Smpx		0.431174	0.00230998	0.0381027	SPIKE	18	6	16.12	8	21.5	4.5	0.25		2.08e-06	3.47e-05	0.00626936	0.104489
2579	Smtn		0.431174	0.00230998	0.0381027	SPIKE	19	15.83	7.52	20	9.5	4.75	0.25		2.08e-06	3.47e-05	0.00626936	0.104489
198	Arhgap19		0.429637	0.00243998	0.0390046	SPIKE	19	7.92	16.23	10	20.5	4.75	0.75		2.25e-06	3.64e-05	0.0067829	0.109623
409	Cd247		0.429919	0.00243998	0.0390046	SPIKE	32	24	8	18	6	8	0.5		2.22e-06	3.63e-05	0.00668585	0.109329
901	Fign		0.428935	0.00244998	0.0390046	SPIKE	26	23.83	12.46	22	11.5	6.5	0.25		2.33e-06	3.71e-05	0.00703041	0.111927
1873	Necab3		0.429521	0.00244998	0.0390046	SPIKE	26	23.83	10.83	22	10	6.5	0.5		2.26e-06	3.64e-05	0.00682325	0.109721
1997	P2ry14		0.429216	0.00244998	0.0390046	SPIKE	19	6.33	15.83	8	20	4.75	0.5		2.3e-06	3.68e-05	0.00693013	0.110882
2264	Rbm12		0.429637	0.00243998	0.0390046	SPIKE	22	0	12.38	0	13.5	5.5	0.25		2.25e-06	3.64e-05	0.0067829	0.109623
2488	Slc17a7		0.429888	0.00243998	0.0390046	SPIKE	18	0	7.88	0	10.5	4.5	0.75		2.22e-06	3.63e-05	0.00669643	0.109329
354	Caskin2		0.42864	0.00251997	0.0397237	SPIKE	33	11	25.44	8	18.5	8.25	0.75		2.37e-06	3.73e-05	0.00713708	0.112506
403	Ccnl1		0.428673	0.00251997	0.0397237	SPIKE	29	24.17	11.48	20	9.5	7.25	0.25		2.36e-06	3.73e-05	0.00712505	0.112506
949	Gask1b		0.428466	0.00254997	0.0398045	SPIKE	24	2	12.5	2	12.5	6	0.75		2.39e-06	3.75e-05	0.00720045	0.112948
2204	Ptgfrn		0.428325	0.00254997	0.0398045	SPIKE	27	0	11.81	0	10.5	6.75	0.75		2.41e-06	3.76e-05	0.00725241	0.113208
2021	Pcdhb19		0.426993	0.00262997	0.040854	SPIKE	26	23.83	10.83	22	10	6.5	0.5		2.58e-06	4e-05	0.00776119	0.120562
552	Cntnap5a		0.42671	0.00268997	0.0415841	SPIKE	25	0	10.94	0	10.5	6.25	0.75		2.61e-06	4.04e-05	0.00787356	0.121717
562	Col4a4		0.426012	0.00271997	0.0416455	SPIKE	18	12	1.88	16	2.5	4.5	0.75		2.71e-06	4.15e-05	0.00815765	0.124902
1221	Gm8300		0.426092	0.00271997	0.0416455	SPIKE	18	0	9	0	12	3	0.5		2.7e-06	4.15e-05	0.00812472	0.124902
903	Filip1l		0.425785	0.00273997	0.041752	SPIKE	34	28.33	9.21	20	6.5	8.5	0.75		2.74e-06	4.17e-05	0.00825215	0.125747
1510	Klhl18		0.425281	0.00279997	0.0422637	SPIKE	24	2	12.5	2	12.5	6	0.75		2.81e-06	4.26e-05	0.00846541	0.128322
2784	Tmem176a		0.425197	0.00279997	0.0422637	SPIKE	24	2	12.5	2	12.5	6	0.75		2.82e-06	4.26e-05	0.00850135	0.128322
367	Catsperg2		0.424604	0.00292997	0.0429087	SPIKE	32	24	8	18	6	8	0.5		2.91e-06	4.27e-05	0.00876053	0.128595
381	Ccdc146		0.424788	0.00291997	0.0429087	SPIKE	18	7.5	15.38	10	20.5	4.5	0.75		2.88e-06	4.27e-05	0.0086793	0.128595
573	Cpa4		0.424604	0.00292997	0.0429087	SPIKE	32	16	0	12	0	8	0.5		2.91e-06	4.27e-05	0.00876053	0.128595
913	Fmnl3		0.424187	0.00294997	0.0429087	SPIKE	28	23.33	11.08	20	9.5	7	0.25		2.97e-06	4.32e-05	0.00894725	0.130142
1119	Gm33046		0.424604	0.00292997	0.0429087	SPIKE	32	24	8	18	6	8	0.5		2.91e-06	4.27e-05	0.00876053	0.128595
1425	Itgad		0.424187	0.00294997	0.0429087	SPIKE	29	24.17	11.48	20	9.5	7.25	0.25		2.97e-06	4.32e-05	0.00894725	0.130142
2964	Uty		0.42475	0.00291997	0.0429087	SPIKE	30	15	28.12	12	22.5	7.5	0.75		2.89e-06	4.27e-05	0.00869614	0.128595
3010	Wdr93		0.424604	0.00292997	0.0429087	SPIKE	32	16	0	12	0	8	0.5		2.91e-06	4.27e-05	0.00876053	0.128595
338	Calcr		0.423751	0.00300997	0.0435833	SPIKE	19	7.92	16.23	10	20.5	4.75	0.75		3.04e-06	4.4e-05	0.0091461	0.132432
1201	Gm6425		0.42324	0.00308997	0.0445401	SPIKE	30	0	13.12	0	10.5	7.5	0.75		3.11e-06	4.49e-05	0.00938492	0.135278
25	4921522P10Rik		0.421732	0.00323997	0.0454732	SPIKE	24	12	0	12	0	8	0.5		3.36e-06	4.73e-05	0.0101248	0.142428
500	Chaf1b		0.421732	0.00323997	0.0454732	SPIKE	18	0	9	0	12	3	0.5		3.36e-06	4.73e-05	0.0101248	0.142428
697	Dlx2		0.422756	0.00322997	0.0454732	SPIKE	20	13.33	4.58	16	5.5	5	0.25		3.19e-06	4.54e-05	0.00961661	0.13677
1298	Gxylt1		0.421687	0.00323997	0.0454732	SPIKE	27	0	11.81	0	10.5	6.75	0.75		3.37e-06	4.73e-05	0.010148	0.142428
1623	Lrrc28		0.422957	0.00322997	0.0454732	SPIKE	24	2	12.5	2	12.5	6	0.75		3.16e-06	4.51e-05	0.00951975	0.135996
2831	Tpx2		0.423148	0.00317997	0.0454732	SPIKE	30	22.5	7.5	18	6	5	0.5		3.13e-06	4.49e-05	0.00942857	0.135298
610	Cx3cr1		0.420602	0.00364996	0.0504823	SPIKE	24	2	12.5	2	12.5	6	0.75		3.56e-06	4.94e-05	0.0107158	0.148894
1154	Gm40841		0.420542	0.00365996	0.0504823	SPIKE	25	0	10.94	0	10.5	6.25	0.75		3.57e-06	4.94e-05	0.0107483	0.148894
2257	Rasal2		0.420874	0.00364996	0.0504823	SPIKE	28	0	12.25	0	10.5	7	0.75		3.51e-06	4.9e-05	0.0105706	0.147711
2770	Tm6sf1		0.420117	0.00365996	0.0504823	SPIKE	19	17.42	7.92	22	10	4.75	0.5		3.64e-06	5.03e-05	0.0109791	0.151436
793	Eogt		0.41958	0.00376996	0.0517763	SPIKE	24	12	0	12	0	8	0.5		3.74e-06	5.14e-05	0.0112781	0.154893
2201	Ptchd4		0.418819	0.00399996	0.0544675	SPIKE	28	0	12.25	0	10.5	7	0.75		3.89e-06	5.32e-05	0.0117155	0.160212
2675	Sytl2		0.418724	0.00399996	0.0544675	SPIKE	24	0	12	0	12	4	0.5		3.91e-06	5.32e-05	0.0117715	0.160293
420	Cd74		0.418163	0.00413996	0.0556633	SPIKE	18	6	16.12	8	21.5	4.5	0.25		4.02e-06	5.43e-05	0.0121051	0.163475
444	Cdk20		0.41816	0.00413996	0.0556633	SPIKE	18	7.5	15.38	10	20.5	4.5	0.75		4.02e-06	5.43e-05	0.0121073	0.163475
2158	Ppp1r16a		0.418024	0.00413996	0.0556633	SPIKE	18	6	16.12	8	21.5	4.5	0.25		4.05e-06	5.44e-05	0.0121893	0.163889
1783	Myadm		0.41713	0.00433996	0.0581082	SPIKE	18	0	9	0	12	3	0.5		4.23e-06	5.66e-05	0.0127443	0.170635
717	Dock6		0.416378	0.00441996	0.0586882	SPIKE	24	12	0	12	0	8	0.5		4.39e-06	5.82e-05	0.0132298	0.17535
2277	Rcn3		0.416359	0.00441996	0.0586882	SPIKE	29	24.17	11.48	20	9.5	7.25	0.25		4.4e-06	5.82e-05	0.0132422	0.17535
879	Fbxo41		0.416248	0.00450996	0.0593904	SPIKE	32	24	8	18	6	8	0.5		4.42e-06	5.82e-05	0.0133156	0.17535
2347	Rps19-ps3		0.416282	0.00450996	0.0593904	SPIKE	32	8	24	6	18	10.67	0.5		4.41e-06	5.82e-05	0.0132926	0.17535
886	Fchsd2		0.415804	0.00456995	0.0596892	SPIKE	26	23.83	10.83	22	10	6.5	0.5		4.52e-06	5.91e-05	0.0136122	0.178169
3074	Zfp120		0.415761	0.00456995	0.0596892	SPIKE	32	24	8	18	6	8	0.5		4.53e-06	5.91e-05	0.0136411	0.178169
366	Catsperg1		0.415168	0.00476995	0.0610554	SPIKE	19	6.33	15.83	8	20	3.17	0.5		4.66e-06	5.97e-05	0.0140477	0.17981
1493	Kif21b		0.41527	0.00476995	0.0610554	SPIKE	27	0	11.81	0	10.5	6.75	0.75		4.64e-06	5.97e-05	0.0139772	0.17981
1901	Niban3		0.415168	0.00476995	0.0610554	SPIKE	20	18.33	7.08	22	8.5	5	0.75		4.66e-06	5.97e-05	0.0140477	0.17981
2513	Slc2a9		0.415168	0.00476995	0.0610554	SPIKE	30	22.5	7.5	18	6	5	0.5		4.66e-06	5.97e-05	0.0140477	0.17981
3041	Zbbx		0.415451	0.00469995	0.0610554	SPIKE	18	6	15	8	20	6	0.5		4.6e-06	5.97e-05	0.0138521	0.17981
2833	Trafd1		0.414304	0.00482995	0.0615771	SPIKE	22	0	12.38	0	13.5	5.5	0.25		4.87e-06	6.2e-05	0.0146617	0.186922
148	Alg9		0.413037	0.00516995	0.0632748	SPIKE	29	12.08	24.77	10	20.5	7.25	0.75		5.18e-06	6.45e-05	0.0156078	0.194338
306	Btbd9		0.412762	0.00517995	0.0632748	SPIKE	30	22.5	7.5	18	6	5	0.5		5.25e-06	6.48e-05	0.0158206	0.195388
342	Capn15		0.413218	0.00516995	0.0632748	SPIKE	26	23.83	10.83	22	10	6.5	0.5		5.13e-06	6.45e-05	0.0154694	0.194201
461	Cenpk		0.412189	0.00523995	0.0632748	SPIKE	22	0	12.38	0	13.5	5.5	0.25		5.4e-06	6.52e-05	0.0162731	0.196505
813	Etnk2		0.413396	0.00516995	0.0632748	SPIKE	19	6.33	15.83	8	20	3.17	0.5		5.09e-06	6.44e-05	0.0153338	0.193946
892	Fgd4		0.412325	0.00523995	0.0632748	SPIKE	24	2	12.5	2	12.5	6	0.75		5.37e-06	6.52e-05	0.0161649	0.196505
1246	Golgb1		0.412873	0.00517995	0.0632748	SPIKE	24	2	12.5	2	12.5	6	0.75		5.22e-06	6.48e-05	0.0157345	0.195156
1403	Inka2		0.413107	0.00516995	0.0632748	SPIKE	22	0	12.38	0	13.5	5.5	0.25		5.16e-06	6.45e-05	0.0155539	0.194338
1455	Kcnb2		0.413761	0.00500995	0.0632748	SPIKE	24	2	12.5	2	12.5	6	0.75		5e-06	6.35e-05	0.0150598	0.191235
1765	Mta1		0.412254	0.00523995	0.0632748	SPIKE	24	2	12.5	2	12.5	6	0.75		5.38e-06	6.52e-05	0.016221	0.196505
2041	Pdk4		0.412614	0.00521995	0.0632748	SPIKE	24	2	12.5	2	12.5	6	0.75		5.29e-06	6.48e-05	0.0159364	0.195388
2140	Poli		0.412354	0.00523995	0.0632748	SPIKE	24	0	12	0	12	4	0.5		5.36e-06	6.52e-05	0.0161421	0.196505
2313	Ripk2		0.41321	0.00516995	0.0632748	SPIKE	24	2	14	2	14	6	0.5		5.14e-06	6.45e-05	0.0154754	0.194201
2808	Tnfaip3		0.412614	0.00521995	0.0632748	SPIKE	24	2	12.5	2	12.5	6	0.75		5.29e-06	6.48e-05	0.0159364	0.195388
8	1700094D03Rik		0.409881	0.00584994	0.0693326	NSPIKE	32	14	0	10.5	0	24	0.25		6.05e-06	7.13e-05	0.0182251	0.214907
191	Apold1		0.410347	0.00583994	0.0693326	SPIKE	26	21.67	10.29	20	9.5	6.5	0.25		5.91e-06	7.06e-05	0.0178135	0.212836
220	Armh1		0.410258	0.00583994	0.0693326	SPIKE	27	0	11.81	0	10.5	6.75	0.75		5.94e-06	7.06e-05	0.0178915	0.212836
2007	Papss2		0.410865	0.00583994	0.0693326	SPIKE	24	2	12.5	2	12.5	6	0.75		5.76e-06	6.93e-05	0.0173672	0.208929
2542	Slc6a13		0.410258	0.00583994	0.0693326	SPIKE	27	0	11.81	0	10.5	6.75	0.75		5.94e-06	7.06e-05	0.0178915	0.212836
955	Gcfc2		0.409627	0.00601994	0.0700502	SPIKE	24	2	12.5	2	12.5	6	0.75		6.12e-06	7.13e-05	0.0184532	0.214907
1000	Gm13331		0.409627	0.00601994	0.0700502	SPIKE	24	6	16.5	6	16.5	6	0.75		6.12e-06	7.13e-05	0.0184532	0.214907
1734	Mmp28		0.409616	0.00601994	0.0700502	SPIKE	18	7.5	15.38	10	20.5	4.5	0.75		6.13e-06	7.13e-05	0.0184631	0.214907
1900	Niban2		0.409708	0.00601994	0.0700502	SPIKE	18	0	9	0	12	3	0.5		6.1e-06	7.13e-05	0.01838	0.214907
2231	Qrfprl		0.409607	0.00601994	0.0700502	SPIKE	24	10	23.5	10	23.5	6	0.25		6.13e-06	7.13e-05	0.0184706	0.214907
1132	Gm35364		0.409462	0.00632994	0.0730928	SPIKE	32	16	0	12	0	8	0.5		6.17e-06	7.13e-05	0.0186029	0.214907
1371	Ifnar1		0.408448	0.00634994	0.0730928	SPIKE	25	0	10.94	0	10.5	6.25	0.75		6.49e-06	7.47e-05	0.0195473	0.225005
2455	Shisa6		0.409462	0.00632994	0.0730928	SPIKE	32	24	8	18	6	8	0.5		6.17e-06	7.13e-05	0.0186029	0.214907
1124	Gm33984		0.407973	0.00649994	0.0745512	SPIKE	34	19.83	2.83	14	2	8.5	0.5		6.64e-06	7.62e-05	0.0200052	0.229451
623	Cyp2j6		0.407363	0.00678993	0.0770489	SPIKE	19	6.33	15.83	8	20	4.75	0.5		6.84e-06	7.76e-05	0.020608	0.23385
667	Ddn		0.407379	0.00678993	0.0770489	SPIKE	25	0	10.94	0	10.5	6.25	0.75		6.83e-06	7.76e-05	0.0205927	0.23385
986	Gm10355		0.407363	0.00678993	0.0770489	SPIKE	33	11	27.5	8	20	11	0.5		6.84e-06	7.76e-05	0.020608	0.23385
96	Acvr2b		0.406439	0.00694993	0.0783091	SPIKE	30	0	13.12	0	10.5	7.5	0.75		7.15e-06	8.06e-05	0.0215553	0.242877
1676	Mbd6		0.406439	0.00694993	0.0783091	SPIKE	23	1.92	11.98	2	12.5	5.75	0.75		7.15e-06	8.06e-05	0.0215553	0.242877
1430	Itgb7		0.405176	0.00727993	0.0806082	SPIKE	18	0	9	0	12	3	0.5		7.61e-06	8.43e-05	0.0229171	0.254077
1574	Lmo7		0.40515	0.00727993	0.0806082	SPIKE	24	0	12	0	12	4	0.5		7.62e-06	8.43e-05	0.0229463	0.254077
1701	Metap1d		0.405193	0.00727993	0.0806082	SPIKE	29	24.17	11.48	20	9.5	7.25	0.25		7.6e-06	8.43e-05	0.0228983	0.254077
2834	Traip		0.40515	0.00727993	0.0806082	SPIKE	24	2	12.5	2	12.5	6	0.75		7.62e-06	8.43e-05	0.0229463	0.254077
3026	Xkr8		0.405258	0.00727993	0.0806082	SPIKE	32	24	8	18	6	8	0.5		7.58e-06	8.43e-05	0.022826	0.254077
34	4933427D14Rik		0.400478	0.00875991	0.0816574	SPIKE	24	2	12.5	2	12.5	6	0.75		9.54e-06	8.72e-05	0.0287379	0.262646
210	Arhgef33		0.400062	0.00910991	0.0816574	SPIKE	35	2.92	20.42	2	14	8.75	0.5		9.73e-06	8.72e-05	0.0293169	0.262646
244	Atp13a1		0.40291	0.00798992	0.0816574	SPIKE	22	0	12.38	0	13.5	5.5	0.25		8.49e-06	8.72e-05	0.0255692	0.262646
348	Car4		0.400885	0.00873991	0.0816574	NSPIKE	28	19.25	7	16.5	6	21	0.25		9.35e-06	8.72e-05	0.0281836	0.262646
371	Cbln2		0.400494	0.00875991	0.0816574	SPIKE	26	23.83	10.83	22	10	6.5	0.5		9.53e-06	8.72e-05	0.0287166	0.262646
542	Cnksr3		0.401137	0.00868991	0.0816574	SPIKE	26	0	13	0	12	8.67	0.5		9.24e-06	8.72e-05	0.0278449	0.262646
766	Efl1		0.403521	0.00791992	0.0816574	SPIKE	30	22.5	7.5	18	6	5	0.5		8.24e-06	8.72e-05	0.0248266	0.262646
785	Enkd1		0.404153	0.00767992	0.0816574	SPIKE	24	2	12.5	2	12.5	6	0.75		7.99e-06	8.7e-05	0.0240806	0.262102
963	Gemin5		0.403897	0.00775992	0.0816574	SPIKE	26	23.83	10.83	22	10	6.5	0.5		8.09e-06	8.72e-05	0.0243798	0.262646
1018	Gm16470		0.400324	0.00910991	0.0816574	SPIKE	18	6	16.12	8	21.5	4.5	0.25		9.61e-06	8.72e-05	0.0289519	0.262646
1040	Gm22252		0.400324	0.00910991	0.0816574	SPIKE	19	15.83	7.52	20	9.5	4.75	0.25		9.61e-06	8.72e-05	0.0289519	0.262646
1043	Gm22449		0.400324	0.00910991	0.0816574	SPIKE	19	15.83	7.52	20	9.5	4.75	0.25		9.61e-06	8.72e-05	0.0289519	0.262646
1044	Gm22511		0.400324	0.00910991	0.0816574	SPIKE	19	15.83	7.52	20	9.5	4.75	0.25		9.61e-06	8.72e-05	0.0289519	0.262646
1045	Gm22524		0.400324	0.00910991	0.0816574	SPIKE	19	15.83	7.52	20	9.5	4.75	0.25		9.61e-06	8.72e-05	0.0289519	0.262646
1046	Gm22627		0.400324	0.00910991	0.0816574	SPIKE	19	15.83	7.52	20	9.5	4.75	0.25		9.61e-06	8.72e-05	0.0289519	0.262646
1047	Gm22630		0.400324	0.00910991	0.0816574	SPIKE	19	15.83	7.52	20	9.5	4.75	0.25		9.61e-06	8.72e-05	0.0289519	0.262646
1048	Gm22632		0.400324	0.00910991	0.0816574	SPIKE	19	15.83	7.52	20	9.5	4.75	0.25		9.61e-06	8.72e-05	0.0289519	0.262646
1050	Gm22909		0.400324	0.00910991	0.0816574	SPIKE	19	15.83	7.52	20	9.5	4.75	0.25		9.61e-06	8.72e-05	0.0289519	0.262646
1051	Gm22912		0.400324	0.00910991	0.0816574	SPIKE	19	15.83	7.52	20	9.5	4.75	0.25		9.61e-06	8.72e-05	0.0289519	0.262646
1052	Gm22996		0.400324	0.00910991	0.0816574	SPIKE	19	15.83	7.52	20	9.5	4.75	0.25		9.61e-06	8.72e-05	0.0289519	0.262646
1054	Gm23356		0.400324	0.00910991	0.0816574	SPIKE	19	15.83	7.52	20	9.5	4.75	0.25		9.61e-06	8.72e-05	0.0289519	0.262646
1055	Gm23560		0.400324	0.00910991	0.0816574	SPIKE	19	15.83	7.52	20	9.5	4.75	0.25		9.61e-06	8.72e-05	0.0289519	0.262646
1056	Gm23575		0.400324	0.00910991	0.0816574	SPIKE	19	15.83	7.52	20	9.5	4.75	0.25		9.61e-06	8.72e-05	0.0289519	0.262646
1057	Gm23922		0.400324	0.00910991	0.0816574	SPIKE	19	15.83	7.52	20	9.5	4.75	0.25		9.61e-06	8.72e-05	0.0289519	0.262646
1058	Gm24027		0.400324	0.00910991	0.0816574	SPIKE	19	15.83	7.52	20	9.5	4.75	0.25		9.61e-06	8.72e-05	0.0289519	0.262646
1059	Gm24206		0.400324	0.00910991	0.0816574	SPIKE	19	15.83	7.52	20	9.5	4.75	0.25		9.61e-06	8.72e-05	0.0289519	0.262646
1060	Gm24219		0.400324	0.00910991	0.0816574	SPIKE	19	15.83	7.52	20	9.5	4.75	0.25		9.61e-06	8.72e-05	0.0289519	0.262646
1063	Gm24528		0.400324	0.00910991	0.0816574	SPIKE	19	15.83	7.52	20	9.5	4.75	0.25		9.61e-06	8.72e-05	0.0289519	0.262646
1064	Gm24585		0.400324	0.00910991	0.0816574	SPIKE	19	15.83	7.52	20	9.5	4.75	0.25		9.61e-06	8.72e-05	0.0289519	0.262646
1065	Gm24657		0.400324	0.00910991	0.0816574	SPIKE	19	15.83	7.52	20	9.5	4.75	0.25		9.61e-06	8.72e-05	0.0289519	0.262646
1066	Gm24702		0.400324	0.00910991	0.0816574	SPIKE	19	15.83	7.52	20	9.5	4.75	0.25		9.61e-06	8.72e-05	0.0289519	0.262646
1067	Gm24759		0.400324	0.00910991	0.0816574	SPIKE	19	15.83	7.52	20	9.5	4.75	0.25		9.61e-06	8.72e-05	0.0289519	0.262646
1070	Gm24872		0.400324	0.00910991	0.0816574	SPIKE	19	15.83	7.52	20	9.5	4.75	0.25		9.61e-06	8.72e-05	0.0289519	0.262646
1073	Gm25098		0.400324	0.00910991	0.0816574	SPIKE	19	15.83	7.52	20	9.5	4.75	0.25		9.61e-06	8.72e-05	0.0289519	0.262646
1075	Gm25146		0.400324	0.00910991	0.0816574	SPIKE	19	15.83	7.52	20	9.5	4.75	0.25		9.61e-06	8.72e-05	0.0289519	0.262646
1076	Gm25209		0.400324	0.00910991	0.0816574	SPIKE	19	15.83	7.52	20	9.5	4.75	0.25		9.61e-06	8.72e-05	0.0289519	0.262646
1078	Gm25230		0.400324	0.00910991	0.0816574	SPIKE	19	15.83	7.52	20	9.5	4.75	0.25		9.61e-06	8.72e-05	0.0289519	0.262646
1079	Gm25314		0.400324	0.00910991	0.0816574	SPIKE	19	15.83	7.52	20	9.5	4.75	0.25		9.61e-06	8.72e-05	0.0289519	0.262646
1080	Gm25449		0.400324	0.00910991	0.0816574	SPIKE	19	15.83	7.52	20	9.5	4.75	0.25		9.61e-06	8.72e-05	0.0289519	0.262646
1081	Gm25462		0.400324	0.00910991	0.0816574	SPIKE	19	15.83	7.52	20	9.5	4.75	0.25		9.61e-06	8.72e-05	0.0289519	0.262646
1082	Gm25463		0.400324	0.00910991	0.0816574	SPIKE	19	15.83	7.52	20	9.5	4.75	0.25		9.61e-06	8.72e-05	0.0289519	0.262646
1084	Gm25710		0.400324	0.00910991	0.0816574	SPIKE	19	15.83	7.52	20	9.5	4.75	0.25		9.61e-06	8.72e-05	0.0289519	0.262646
1085	Gm25741		0.400324	0.00910991	0.0816574	SPIKE	19	15.83	7.52	20	9.5	4.75	0.25		9.61e-06	8.72e-05	0.0289519	0.262646
1086	Gm25742		0.400324	0.00910991	0.0816574	SPIKE	19	15.83	7.52	20	9.5	4.75	0.25		9.61e-06	8.72e-05	0.0289519	0.262646
1088	Gm26059		0.400324	0.00910991	0.0816574	SPIKE	19	15.83	7.52	20	9.5	4.75	0.25		9.61e-06	8.72e-05	0.0289519	0.262646
1090	Gm26334		0.400324	0.00910991	0.0816574	SPIKE	19	15.83	7.52	20	9.5	4.75	0.25		9.61e-06	8.72e-05	0.0289519	0.262646
1091	Gm26366		0.400324	0.00910991	0.0816574	SPIKE	19	15.83	7.52	20	9.5	4.75	0.25		9.61e-06	8.72e-05	0.0289519	0.262646
1093	Gm26392		0.400324	0.00910991	0.0816574	SPIKE	19	15.83	7.52	20	9.5	4.75	0.25		9.61e-06	8.72e-05	0.0289519	0.262646
1094	Gm26432		0.400324	0.00910991	0.0816574	SPIKE	19	15.83	7.52	20	9.5	4.75	0.25		9.61e-06	8.72e-05	0.0289519	0.262646
1095	Gm26434		0.400324	0.00910991	0.0816574	SPIKE	19	15.83	7.52	20	9.5	4.75	0.25		9.61e-06	8.72e-05	0.0289519	0.262646
1274	Gria3		0.405034	0.00741993	0.0816574	SPIKE	22	0	12.38	0	13.5	5.5	0.25		7.66e-06	8.45e-05	0.0230751	0.254621
1281	Grk4		0.403786	0.00786992	0.0816574	SPIKE	32	24	8	18	6	8	0.5		8.13e-06	8.72e-05	0.0245102	0.262646
1363	Id1		0.400526	0.00875991	0.0816574	SPIKE	32	24	8	18	6	8	0.5		9.52e-06	8.72e-05	0.0286722	0.262646
1543	Lbhd2		0.400774	0.00875991	0.0816574	SPIKE	18	12	1.88	16	2.5	4.5	0.75		9.4e-06	8.72e-05	0.028333	0.262646
1610	Lrch2		0.40014	0.00910991	0.0816574	SPIKE	19	17.42	7.92	22	10	4.75	0.5		9.69e-06	8.72e-05	0.029207	0.262646
1667	Mapkbp1		0.400062	0.00910991	0.0816574	SPIKE	26	23.83	10.83	22	10	6.5	0.5		9.73e-06	8.72e-05	0.0293169	0.262646
1727	Mlip		0.403162	0.00794992	0.0816574	SPIKE	32	24	8	18	6	8	0.5		8.38e-06	8.72e-05	0.0252598	0.262646
2020	Pcdh20		0.40109	0.00869991	0.0816574	SPIKE	26	23.83	10.83	22	10	6.5	0.5		9.26e-06	8.72e-05	0.0279068	0.262646
2228	Pycr1		0.400062	0.00910991	0.0816574	SPIKE	19	6.33	14.65	8	18.5	4.75	0.75		9.73e-06	8.72e-05	0.0293169	0.262646
2408	Sema3a		0.402905	0.00798992	0.0816574	SPIKE	30	27.5	12.5	22	10	7.5	0.5		8.49e-06	8.72e-05	0.0255748	0.262646
2475	Skiv2l		0.404787	0.00763992	0.0816574	SPIKE	18	0	9	0	12	3	0.5		7.75e-06	8.52e-05	0.0233529	0.256802
2554	Slco1a4		0.403162	0.00794992	0.0816574	SPIKE	32	24	8	18	6	8	0.5		8.38e-06	8.72e-05	0.0252598	0.262646
2849	Trim34a		0.401798	0.00868991	0.0816574	SPIKE	29	24.17	11.48	20	9.5	7.25	0.25		8.95e-06	8.72e-05	0.0269742	0.262646
2927	Tulp3		0.404387	0.00764992	0.0816574	SPIKE	18	7.5	15.38	10	20.5	4.5	0.75		7.9e-06	8.63e-05	0.0238093	0.260033
2948	Unc13b		0.401798	0.00868991	0.0816574	SPIKE	26	23.83	12.46	22	11.5	6.5	0.25		8.95e-06	8.72e-05	0.0269742	0.262646
2969	Vars2		0.401131	0.00868991	0.0816574	SPIKE	24	2	12.5	2	12.5	6	0.75		9.24e-06	8.72e-05	0.027853	0.262646
3022	Wtip		0.400062	0.00910991	0.0816574	SPIKE	18	0	7.88	0	10.5	4.5	0.75		9.73e-06	8.72e-05	0.0293169	0.262646
3050	Zbtb41		0.404387	0.00764992	0.0816574	SPIKE	26	23.83	10.83	22	10	6.5	0.5		7.9e-06	8.63e-05	0.0238093	0.260033
690	Dipk2b		0.399964	0.00926991	0.0828595	SPIKE	26	23.83	10.83	22	10	8.67	0.5		9.78e-06	8.72e-05	0.0294554	0.262646
180	Aox1		0.399835	0.00939991	0.0828642	SPIKE	24	12	0	12	0	8	0.5		9.84e-06	8.72e-05	0.0296364	0.262646
1007	Gm15212		0.399892	0.00939991	0.0828642	SPIKE	18	0	7.88	0	10.5	4.5	0.75		9.81e-06	8.72e-05	0.0295565	0.262646
1399	Incenp		0.399872	0.00939991	0.0828642	SPIKE	18	6	15	8	20	6	0.5		9.82e-06	8.72e-05	0.0295848	0.262646
1778	Mtx3		0.399725	0.00939991	0.0828642	SPIKE	18	7.5	15.38	10	20.5	4.5	0.75		9.89e-06	8.72e-05	0.0297939	0.262646
1849	Naaa		0.399725	0.00939991	0.0828642	SPIKE	26	21.67	10.29	20	9.5	6.5	0.25		9.89e-06	8.72e-05	0.0297939	0.262646
1867	Ndor1		0.398413	0.0096499	0.0846019	SPIKE	24	0	13.5	0	13.5	6	0.25		1.05e-05	9.23e-05	0.0317209	0.278101
1915	Noct		0.398623	0.0096499	0.0846019	SPIKE	23	1.92	11.98	2	12.5	5.75	0.75		1.04e-05	9.16e-05	0.0314041	0.27608
52	Abca5		0.396518	0.0105499	0.0890756	SPIKE	19	15.83	7.52	20	9.5	4.75	0.25		1.15e-05	9.88e-05	0.0347138	0.297613
232	Asb4		0.397796	0.0103599	0.0890756	SPIKE	20	5	16.25	6	19.5	5	0.25		1.08e-05	9.43e-05	0.0326669	0.28406
391	Ccdc65		0.396689	0.0104499	0.0890756	SPIKE	22	0	12.38	0	13.5	5.5	0.25		1.14e-05	9.86e-05	0.0344333	0.296999
631	Cyyr1		0.396196	0.0105499	0.0890756	SPIKE	24	0	12	0	12	4	0.5		1.17e-05	9.88e-05	0.0352485	0.297613
866	Fbn1		0.396863	0.0104399	0.0890756	SPIKE	18	0	9	0	12	3	0.5		1.13e-05	9.83e-05	0.0341504	0.296155
1128	Gm34538		0.396196	0.0105499	0.0890756	SPIKE	28	14	0	12	0	7	0.5		1.17e-05	9.88e-05	0.0352485	0.297613
1456	Kcnc1		0.39646	0.0105499	0.0890756	SPIKE	30	15	28.12	12	22.5	7.5	0.75		1.16e-05	9.88e-05	0.0348107	0.297613
1563	Lig4		0.396584	0.0104499	0.0890756	SPIKE	29	24.17	11.48	20	9.5	7.25	0.25		1.15e-05	9.88e-05	0.0346055	0.297613
2059	Pfkfb1		0.397837	0.0103599	0.0890756	SPIKE	25	4.17	15.1	4	14.5	6.25	0.75		1.08e-05	9.43e-05	0.0326034	0.28406
2407	Sell		0.397837	0.0103599	0.0890756	SPIKE	18	16.5	7.5	22	10	6	0.5		1.08e-05	9.43e-05	0.0326034	0.28406
2414	Sema6b		0.396351	0.0105499	0.0890756	SPIKE	18	0	7.88	0	10.5	4.5	0.75		1.16e-05	9.88e-05	0.0349898	0.297613
2836	Trappc6a		0.396313	0.0105499	0.0890756	NSPIKE	21	19.69	10.5	22.5	12	15.75	0.25		1.16e-05	9.88e-05	0.0350542	0.297613
2853	Trim47		0.396196	0.0105499	0.0890756	SPIKE	28	0	14	0	12	7	0.5		1.17e-05	9.88e-05	0.0352485	0.297613
3182	Zgpat		0.396804	0.0104399	0.0890756	SPIKE	24	2	12.5	2	12.5	6	0.75		1.14e-05	9.83e-05	0.0342458	0.29618
87	Acsbg2		0.388514	0.0141199	0.09073	SPIKE	18	4.5	13.5	6	18	3	0.5		1.68e-05	0.000108	0.0505898	0.325075
119	Adgrg6		0.388514	0.0141199	0.09073	SPIKE	34	28.33	11.33	20	8	5.67	0.5		1.68e-05	0.000108	0.0505898	0.325075
131	Agbl3		0.391719	0.0125499	0.09073	SPIKE	24	2	12.5	2	12.5	6	0.75		1.45e-05	0.000108	0.0435441	0.325075
137	Agtr1a		0.388514	0.0141199	0.09073	SPIKE	32	24	8	18	6	8	0.5		1.68e-05	0.000108	0.0505898	0.325075
145	Aknad1		0.388514	0.0141199	0.09073	SPIKE	34	28.33	11.33	20	8	5.67	0.5		1.68e-05	0.000108	0.0505898	0.325075
160	Ankrd10		0.390262	0.0131499	0.09073	SPIKE	24	0	13.5	0	13.5	6	0.25		1.55e-05	0.000108	0.0466245	0.325075
177	Ano5		0.388514	0.0141199	0.09073	SPIKE	32	24	8	18	6	8	0.5		1.68e-05	0.000108	0.0505898	0.325075
212	Arhgef6		0.390563	0.0129299	0.09073	SPIKE	24	14	0.5	14	0.5	6	0.75		1.53e-05	0.000108	0.0459707	0.325075
262	B3galt5		0.39487	0.0113399	0.09073	SPIKE	28	25.67	11.67	22	10	9.33	0.5		1.25e-05	0.000101	0.0375339	0.305619
286	Bfsp1		0.388514	0.0141199	0.09073	SPIKE	18	0	9	0	12	3	0.5		1.68e-05	0.000108	0.0505898	0.325075
292	Bmf		0.388514	0.0141199	0.09073	SPIKE	32	24	8	18	6	8	0.5		1.68e-05	0.000108	0.0505898	0.325075
318	C6		0.388514	0.0141199	0.09073	SPIKE	32	24	8	18	6	8	0.5		1.68e-05	0.000108	0.0505898	0.325075
327	Cacna1c		0.388614	0.0139899	0.09073	SPIKE	25	0	10.94	0	10.5	6.25	0.75		1.67e-05	0.000108	0.0503556	0.325075
383	Ccdc150		0.388514	0.0141199	0.09073	SPIKE	18	0	9	0	12	3	0.5		1.68e-05	0.000108	0.0505898	0.325075
386	Ccdc162		0.388514	0.0141199	0.09073	SPIKE	34	28.33	11.33	20	8	5.67	0.5		1.68e-05	0.000108	0.0505898	0.325075
407	Cd209f		0.388514	0.0141199	0.09073	SPIKE	30	20	5	16	4	7.5	0.5		1.68e-05	0.000108	0.0505898	0.325075
408	Cd22		0.388514	0.0141199	0.09073	SPIKE	18	0	9	0	12	3	0.5		1.68e-05	0.000108	0.0505898	0.325075
496	Cfi		0.388514	0.0141199	0.09073	SPIKE	32	16	0	12	0	8	0.5		1.68e-05	0.000108	0.0505898	0.325075
518	Chtf18		0.388514	0.0141199	0.09073	SPIKE	34	28.33	11.33	20	8	5.67	0.5		1.68e-05	0.000108	0.0505898	0.325075
525	Cldnd2		0.388514	0.0141199	0.09073	SPIKE	32	16	0	12	0	8	0.5		1.68e-05	0.000108	0.0505898	0.325075
535	Cmah		0.388514	0.0141199	0.09073	SPIKE	32	24	8	18	6	8	0.5		1.68e-05	0.000108	0.0505898	0.325075
551	Cntnap4		0.395798	0.0110899	0.09073	SPIKE	23	1.92	13.42	2	14	5.75	0.5		1.19e-05	9.96e-05	0.0359208	0.300207
570	Cort		0.388514	0.0141199	0.09073	SPIKE	18	0	9	0	12	3	0.5		1.68e-05	0.000108	0.0505898	0.325075
639	Dach2		0.388514	0.0141199	0.09073	SPIKE	18	0	9	0	12	3	0.5		1.68e-05	0.000108	0.0505898	0.325075
698	Dlx6os1		0.391412	0.0125499	0.09073	SPIKE	18	10.5	1.5	14	2	4.5	0.5		1.47e-05	0.000108	0.0441774	0.325075
744	DXBay18		0.388514	0.0141199	0.09073	SPIKE	24	12	0	12	0	8	0.5		1.68e-05	0.000108	0.0505898	0.325075
746	Dydc2		0.391412	0.0125499	0.09073	SPIKE	18	7.5	15.38	10	20.5	4.5	0.75		1.47e-05	0.000108	0.0441774	0.325075
757	Ebf4		0.388514	0.0141199	0.09073	SPIKE	32	24	8	18	6	8	0.5		1.68e-05	0.000108	0.0505898	0.325075
759	Eda		0.391719	0.0125499	0.09073	SPIKE	20	1.67	10.42	2	12.5	5	0.75		1.45e-05	0.000108	0.0435441	0.325075
835	Fam122a		0.389605	0.0134299	0.09073	SPIKE	26	23.83	10.83	22	10	6.5	0.5		1.6e-05	0.000108	0.0480787	0.325075
882	Fcer2a		0.388514	0.0141199	0.09073	SPIKE	32	24	8	18	6	8	0.5		1.68e-05	0.000108	0.0505898	0.325075
914	Fmo4		0.388514	0.0141199	0.09073	SPIKE	18	4.5	13.5	6	18	3	0.5		1.68e-05	0.000108	0.0505898	0.325075
950	Gata3		0.388514	0.0141199	0.09073	SPIKE	24	12	0	12	0	8	0.5		1.68e-05	0.000108	0.0505898	0.325075
954	Gbp4		0.388514	0.0141199	0.09073	SPIKE	32	24	8	18	6	8	0.5		1.68e-05	0.000108	0.0505898	0.325075
977	Glb1l2		0.388514	0.0141199	0.09073	SPIKE	32	24	8	18	6	8	0.5		1.68e-05	0.000108	0.0505898	0.325075
996	Gm12248		0.39186	0.0125399	0.09073	SPIKE	24	0	12	0	12	4	0.5		1.44e-05	0.000108	0.0432572	0.325075
1003	Gm13707		0.391943	0.0125399	0.09073	SPIKE	23	1.92	13.42	2	14	5.75	0.5		1.43e-05	0.000108	0.0430897	0.325075
1006	Gm14685		0.388514	0.0141199	0.09073	SPIKE	24	12	0	12	0	8	0.5		1.68e-05	0.000108	0.0505898	0.325075
1021	Gm16867		0.394679	0.0113899	0.09073	SPIKE	27	0	11.81	0	10.5	6.75	0.75		1.26e-05	0.000102	0.0378758	0.306067
1028	Gm19250		0.394899	0.0113399	0.09073	SPIKE	18	4.5	13.5	6	18	3	0.5		1.24e-05	0.000101	0.0374828	0.305619
1041	Gm22255		0.390754	0.0128799	0.09073	SPIKE	19	15.83	7.52	20	9.5	4.75	0.25		1.51e-05	0.000108	0.0455617	0.325075
1049	Gm22834		0.390754	0.0128799	0.09073	SPIKE	19	15.83	7.52	20	9.5	4.75	0.25		1.51e-05	0.000108	0.0455617	0.325075
1068	Gm24799		0.390754	0.0128799	0.09073	SPIKE	19	15.83	7.52	20	9.5	4.75	0.25		1.51e-05	0.000108	0.0455617	0.325075
1069	Gm24866		0.390754	0.0128799	0.09073	SPIKE	19	15.83	7.52	20	9.5	4.75	0.25		1.51e-05	0.000108	0.0455617	0.325075
1071	Gm24926		0.390754	0.0128799	0.09073	SPIKE	19	15.83	7.52	20	9.5	4.75	0.25		1.51e-05	0.000108	0.0455617	0.325075
1083	Gm25523		0.390754	0.0128799	0.09073	SPIKE	19	15.83	7.52	20	9.5	4.75	0.25		1.51e-05	0.000108	0.0455617	0.325075
1140	Gm36736		0.388514	0.0141199	0.09073	SPIKE	32	24	8	18	6	8	0.5		1.68e-05	0.000108	0.0505898	0.325075
1147	Gm39326		0.388514	0.0141199	0.09073	SPIKE	18	4.5	13.5	6	18	3	0.5		1.68e-05	0.000108	0.0505898	0.325075
1151	Gm40451		0.388514	0.0141199	0.09073	SPIKE	32	16	0	12	0	8	0.5		1.68e-05	0.000108	0.0505898	0.325075
1157	Gm41033		0.388514	0.0141199	0.09073	SPIKE	32	24	8	18	6	8	0.5		1.68e-05	0.000108	0.0505898	0.325075
1162	Gm42023		0.388514	0.0141199	0.09073	SPIKE	24	12	0	12	0	8	0.5		1.68e-05	0.000108	0.0505898	0.325075
1163	Gm43380		0.388514	0.0141199	0.09073	SPIKE	18	4.5	13.5	6	18	3	0.5		1.68e-05	0.000108	0.0505898	0.325075
1195	Gm5640		0.388514	0.0141199	0.09073	SPIKE	24	12	0	12	0	8	0.5		1.68e-05	0.000108	0.0505898	0.325075
1199	Gm5936		0.388514	0.0141199	0.09073	SPIKE	24	12	0	12	0	8	0.5		1.68e-05	0.000108	0.0505898	0.325075
1203	Gm6532		0.388614	0.0139899	0.09073	SPIKE	32	13.33	31.33	10	23.5	8	0.25		1.67e-05	0.000108	0.0503556	0.325075
1257	Gpr161		0.392769	0.0121399	0.09073	SPIKE	22	0	12.38	0	13.5	5.5	0.25		1.38e-05	0.000108	0.0414473	0.325075
1264	Gpr68		0.394919	0.0113399	0.09073	SPIKE	18	0	9	0	12	3	0.5		1.24e-05	0.000101	0.0374486	0.305619
1273	Gria2		0.392748	0.0121399	0.09073	NSPIKE	22	20.62	11	22.5	12	16.5	0.25		1.38e-05	0.000108	0.0414874	0.325075
1295	Gucy1a2		0.395031	0.0113399	0.09073	ACOS	23	0	21.08	0	22	23	0.08		1.24e-05	0.000101	0.0372498	0.305619
1297	Gulp1		0.39585	0.0110899	0.09073	SPIKE	24	0	13.5	0	13.5	6	0.25		1.19e-05	9.96e-05	0.0358319	0.300207
1316	Hdac8		0.393713	0.0118199	0.09073	SPIKE	21	3.5	12.69	4	14.5	5.25	0.75		1.32e-05	0.000106	0.0396427	0.318735
1321	Helb		0.388514	0.0141199	0.09073	SPIKE	32	24	8	18	6	8	0.5		1.68e-05	0.000108	0.0505898	0.325075
1365	Ids		0.396035	0.0108399	0.09073	SPIKE	33	11	25.44	8	18.5	8.25	0.75		1.18e-05	9.93e-05	0.0355192	0.299109
1369	Ifi203		0.388514	0.0141199	0.09073	SPIKE	32	8	24	6	18	5.33	0.5		1.68e-05	0.000108	0.0505898	0.325075
1380	Ikzf1		0.392769	0.0121399	0.09073	SPIKE	29	24.17	11.48	20	9.5	7.25	0.25		1.38e-05	0.000108	0.0414473	0.325075
1386	Il13ra2		0.388514	0.0141199	0.09073	SPIKE	32	24	8	18	6	8	0.5		1.68e-05	0.000108	0.0505898	0.325075
1422	Islr2		0.39487	0.0113399	0.09073	SPIKE	26	0	14.62	0	13.5	6.5	0.25		1.25e-05	0.000101	0.0375339	0.305619
1433	Itpr3		0.388514	0.0141199	0.09073	SPIKE	18	0	9	0	12	3	0.5		1.68e-05	0.000108	0.0505898	0.325075
1494	Kif23		0.388514	0.0141199	0.09073	SPIKE	32	24	8	18	6	8	0.5		1.68e-05	0.000108	0.0505898	0.325075
1508	Klhl14		0.388514	0.0141199	0.09073	SPIKE	32	24	8	18	6	8	0.5		1.68e-05	0.000108	0.0505898	0.325075
1517	Klk1b16		0.388514	0.0141199	0.09073	SPIKE	24	12	0	12	0	8	0.5		1.68e-05	0.000108	0.0505898	0.325075
1518	Klk1b24		0.388514	0.0141199	0.09073	SPIKE	24	12	0	12	0	8	0.5		1.68e-05	0.000108	0.0505898	0.325075
1521	Kncn		0.388514	0.0141199	0.09073	SPIKE	32	16	0	12	0	8	0.5		1.68e-05	0.000108	0.0505898	0.325075
1527	Krt77		0.392769	0.0121399	0.09073	SPIKE	22	0	12.38	0	13.5	5.5	0.25		1.38e-05	0.000108	0.0414473	0.325075
1599	LOC118568604		0.394899	0.0113399	0.09073	SPIKE	24	12	0	12	0	8	0.5		1.24e-05	0.000101	0.0374828	0.305619
1607	Lpxn		0.388514	0.0141199	0.09073	SPIKE	32	16	0	12	0	8	0.5		1.68e-05	0.000108	0.0505898	0.325075
1627	Lrrc56		0.394919	0.0113399	0.09073	SPIKE	30	22.5	7.5	18	6	5	0.5		1.24e-05	0.000101	0.0374486	0.305619
1642	Ly6i		0.388514	0.0141199	0.09073	SPIKE	32	16	0	12	0	8	0.5		1.68e-05	0.000108	0.0505898	0.325075
1894	Nfil3		0.395737	0.0110999	0.09073	SPIKE	33	11	25.44	8	18.5	8.25	0.75		1.2e-05	9.96e-05	0.0360248	0.300207
1895	Nfkbid		0.388514	0.0141199	0.09073	SPIKE	32	8	24	6	18	5.33	0.5		1.68e-05	0.000108	0.0505898	0.325075
1914	Noc4l		0.389902	0.0133999	0.09073	SPIKE	18	7.5	15.38	10	20.5	4.5	0.75		1.57e-05	0.000108	0.0474157	0.325075
1943	Nt5c1b		0.388514	0.0141199	0.09073	SPIKE	32	24	8	18	6	8	0.5		1.68e-05	0.000108	0.0505898	0.325075
1987	Otogl		0.388514	0.0141199	0.09073	SPIKE	18	0	9	0	12	3	0.5		1.68e-05	0.000108	0.0505898	0.325075
2001	Pabpc4l		0.388514	0.0141199	0.09073	SPIKE	18	0	9	0	12	3	0.5		1.68e-05	0.000108	0.0505898	0.325075
2017	Pax9		0.388514	0.0141199	0.09073	SPIKE	32	16	0	12	0	8	0.5		1.68e-05	0.000108	0.0505898	0.325075
2026	Pcmtd1		0.393201	0.0121099	0.09073	NSPIKE	24	20.5	10	20.5	10	18	0.25		1.35e-05	0.000108	0.0406118	0.324894
2069	Phf19		0.388514	0.0141199	0.09073	SPIKE	32	16	0	12	0	8	0.5		1.68e-05	0.000108	0.0505898	0.325075
2094	Pkd1l3		0.389963	0.0133999	0.09073	SPIKE	18	0	9	0	12	3	0.5		1.57e-05	0.000108	0.0472807	0.325075
2127	Plxnd1		0.390563	0.0129299	0.09073	SPIKE	32	24	8	18	6	8	0.5		1.53e-05	0.000108	0.0459707	0.325075
2197	Psg19		0.388514	0.0141199	0.09073	SPIKE	32	16	0	12	0	8	0.5		1.68e-05	0.000108	0.0505898	0.325075
2198	Psg25		0.388514	0.0141199	0.09073	SPIKE	32	16	0	12	0	8	0.5		1.68e-05	0.000108	0.0505898	0.325075
2288	Relch		0.393218	0.0120999	0.09073	SPIKE	35	0	19.69	0	13.5	8.75	0.25		1.35e-05	0.000108	0.0405808	0.324894
2339	Rp2		0.389963	0.0133999	0.09073	SPIKE	24	12	0	12	0	8	0.5		1.57e-05	0.000108	0.0472807	0.325075
2359	Rrp8		0.390021	0.0133999	0.09073	SPIKE	24	2	12.5	2	12.5	6	0.75		1.56e-05	0.000108	0.0471526	0.325075
2388	Satb2		0.388514	0.0141199	0.09073	SPIKE	18	0	9	0	12	3	0.5		1.68e-05	0.000108	0.0505898	0.325075
2422	Serpina3i		0.388514	0.0141199	0.09073	SPIKE	34	28.33	11.33	20	8	5.67	0.5		1.68e-05	0.000108	0.0505898	0.325075
2510	Slc28a2		0.388514	0.0141199	0.09073	SPIKE	18	0	9	0	12	3	0.5		1.68e-05	0.000108	0.0505898	0.325075
2519	Slc35d1		0.389963	0.0133999	0.09073	SPIKE	18	0	9	0	12	3	0.5		1.57e-05	0.000108	0.0472807	0.325075
2592	Soat1		0.395247	0.0112799	0.09073	SPIKE	26	23.83	10.83	22	10	6.5	0.5		1.22e-05	0.000101	0.0368713	0.305619
2607	Spata9		0.388514	0.0141199	0.09073	SPIKE	32	24	8	18	6	8	0.5		1.68e-05	0.000108	0.0505898	0.325075
2653	Stk39		0.391819	0.0125399	0.09073	NSPIKE	28	19.25	7	16.5	6	21	0.25		1.44e-05	0.000108	0.0433408	0.325075
2669	Syde2		0.388514	0.0141199	0.09073	SPIKE	32	24	8	18	6	8	0.5		1.68e-05	0.000108	0.0505898	0.325075
2670	Syna		0.388514	0.0141199	0.09073	SPIKE	32	24	8	18	6	8	0.5		1.68e-05	0.000108	0.0505898	0.325075
2710	Tchh		0.39487	0.0113399	0.09073	SPIKE	21	3.5	12.69	4	14.5	5.25	0.75		1.25e-05	0.000101	0.0375339	0.305619
2711	Tcim		0.391719	0.0125499	0.09073	SPIKE	20	1.67	10.42	2	12.5	5	0.75		1.45e-05	0.000108	0.0435441	0.325075
2712	Tcp10a		0.394679	0.0113899	0.09073	SPIKE	22	0	11	0	12	5.5	0.5		1.26e-05	0.000102	0.0378758	0.306067
2713	Tcp10b		0.394679	0.0113899	0.09073	SPIKE	22	0	11	0	12	5.5	0.5		1.26e-05	0.000102	0.0378758	0.306067
2721	Tdrd1		0.388514	0.0141199	0.09073	SPIKE	32	24	8	18	6	8	0.5		1.68e-05	0.000108	0.0505898	0.325075
2733	Tex15		0.388514	0.0141199	0.09073	SPIKE	32	24	8	18	6	8	0.5		1.68e-05	0.000108	0.0505898	0.325075
2738	Tfap2a		0.388514	0.0141199	0.09073	SPIKE	18	0	9	0	12	3	0.5		1.68e-05	0.000108	0.0505898	0.325075
2776	Tmem104		0.395737	0.0110999	0.09073	SPIKE	32	26.67	8.67	20	6.5	8	0.75		1.2e-05	9.96e-05	0.0360248	0.300207
2781	Tmem161b		0.392348	0.0122399	0.09073	SPIKE	24	0	12	0	12	4	0.5		1.4e-05	0.000108	0.0422758	0.325075
2790	Tmem211		0.388514	0.0141199	0.09073	SPIKE	32	16	0	12	0	8	0.5		1.68e-05	0.000108	0.0505898	0.325075
2875	Trp63		0.388514	0.0141199	0.09073	SPIKE	32	16	0	12	0	8	0.5		1.68e-05	0.000108	0.0505898	0.325075
2887	Tshb		0.394602	0.0113899	0.09073	SPIKE	29	12.08	26.58	10	22	9.67	0.5		1.26e-05	0.000102	0.0380133	0.306404
2980	Vmn2r47		0.388514	0.0141199	0.09073	SPIKE	32	16	0	12	0	8	0.5		1.68e-05	0.000108	0.0505898	0.325075
3006	Wdr38		0.388514	0.0141199	0.09073	SPIKE	32	16	0	12	0	8	0.5		1.68e-05	0.000108	0.0505898	0.325075
3115	Zfp469		0.388514	0.0141199	0.09073	SPIKE	34	28.33	11.33	20	8	5.67	0.5		1.68e-05	0.000108	0.0505898	0.325075
3140	Zfp663		0.388514	0.0141199	0.09073	SPIKE	32	16	0	12	0	8	0.5		1.68e-05	0.000108	0.0505898	0.325075
58	Abcc1		0.387243	0.0146599	0.0925908	SPIKE	24	2	12.5	2	12.5	6	0.75		1.78e-05	0.000113	0.0536747	0.340792
203	Arhgap4		0.387087	0.0146699	0.0925908	SPIKE	18	0	7.88	0	10.5	4.5	0.75		1.79e-05	0.000113	0.0540646	0.34191
575	Cped1		0.387087	0.0146699	0.0925908	SPIKE	35	2.92	20.42	2	14	8.75	0.5		1.79e-05	0.000113	0.0540646	0.34191
596	Cryzl2		0.386803	0.0146699	0.0925908	SPIKE	22	0	12.38	0	13.5	5.5	0.25		1.82e-05	0.000115	0.0547835	0.345721
1330	Hinfp		0.387564	0.0146399	0.0925908	SPIKE	18	10.5	1.5	14	2	4.5	0.5		1.76e-05	0.000112	0.0528782	0.336402
1584	LOC115490435		0.388069	0.0145299	0.0925908	ACOS	24	16	10	16	10	24	0.25		1.71e-05	0.00011	0.0516498	0.331221
2121	Plk5		0.387701	0.0146399	0.0925908	SPIKE	26	2.17	13.54	2	12.5	6.5	0.75		1.74e-05	0.000111	0.0525429	0.334935
2569	Smarcad1		0.387992	0.0145299	0.0925908	NSPIKE	28	19.25	7	16.5	6	21	0.25		1.72e-05	0.00011	0.0518365	0.331754
3163	Zfp831		0.387701	0.0146399	0.0925908	SPIKE	22	0	12.38	0	13.5	5.5	0.25		1.74e-05	0.000111	0.0525429	0.334935
2901	Ttc14		0.386763	0.0150098	0.0945502	NSPIKE	20	3.75	15	4.5	18	15	0.25		1.82e-05	0.000115	0.0548832	0.345721
228	Asap1		0.384938	0.0159198	0.0985367	SPIKE	24	2	12.5	2	12.5	6	0.75		1.98e-05	0.000123	0.0597253	0.369673
260	B130024G19Rik		0.385677	0.0158498	0.0985367	NSPIKE	24	18.5	8	18.5	8	18	0.25		1.92e-05	0.00012	0.0577177	0.361441
614	Cyb561d1		0.385027	0.0159098	0.0985367	SPIKE	31	25.83	8.4	20	6.5	7.75	0.75		1.97e-05	0.000122	0.0594817	0.368879
634	D16Ertd472e		0.385249	0.0159098	0.0985367	SPIKE	25	0	10.94	0	10.5	6.25	0.75		1.95e-05	0.000121	0.0588731	0.365814
1426	Itgae		0.385362	0.0158998	0.0985367	SPIKE	20	16.67	7.92	20	9.5	5	0.25		1.94e-05	0.000121	0.0585661	0.365324
1853	Nagpa		0.385376	0.0158498	0.0985367	SPIKE	20	5	16.25	6	19.5	5	0.25		1.94e-05	0.000121	0.0585279	0.365324
1969	Ogfod1		0.386187	0.0157998	0.0985367	SPIKE	32	24	8	18	6	8	0.5		1.87e-05	0.000118	0.0563695	0.354386
2924	Tuft1		0.385249	0.0159098	0.0985367	SPIKE	19	6.33	14.65	8	18.5	4.75	0.75		1.95e-05	0.000121	0.0588731	0.365814
3002	Wdr13		0.385765	0.0158498	0.0985367	SPIKE	18	6	16.12	8	21.5	4.5	0.25		1.91e-05	0.00012	0.0574833	0.36068
718	Dock7		0.384708	0.0160098	0.0989025	NSPIKE	26	17.88	6.5	16.5	6	19.5	0.25		2e-05	0.000124	0.0603649	0.372911
1038	Gm21936		0.384479	0.0165198	0.101007	SPIKE	22	0	12.38	0	13.5	5.5	0.25		2.02e-05	0.000125	0.0610061	0.376145
1862	Nckap5l		0.384264	0.0165398	0.101007	SPIKE	32	24	8	18	6	8	0.5		2.04e-05	0.000125	0.0616154	0.376277
1960	Oas1g		0.384264	0.0165398	0.101007	SPIKE	31	25.83	8.4	20	6.5	7.75	0.75		2.04e-05	0.000125	0.0616154	0.376277
2064	Pgf		0.384264	0.0165398	0.101007	SPIKE	24	12	0	12	0	8	0.5		2.04e-05	0.000125	0.0616154	0.376277
2424	Serpinb1a		0.384264	0.0165398	0.101007	SPIKE	24	12	0	12	0	8	0.5		2.04e-05	0.000125	0.0616154	0.376277
3157	Zfp780b		0.38434	0.0165198	0.101007	SPIKE	32	8	24	6	18	5.33	0.5		2.04e-05	0.000125	0.0613983	0.376277
155	Amigo1		0.38399	0.0167198	0.101525	SPIKE	18	6	16.12	8	21.5	4.5	0.25		2.07e-05	0.000126	0.0623995	0.378896
990	Gm11100		0.384165	0.0167198	0.101525	SPIKE	34	5.67	24.79	4	17.5	8.5	0.25		2.05e-05	0.000125	0.061896	0.377008
2045	Pdzd2		0.384139	0.0167198	0.101525	SPIKE	27	0	11.81	0	10.5	6.75	0.75		2.06e-05	0.000125	0.0619706	0.377008
112	Adarb2		0.383349	0.0169198	0.10165	SPIKE	35	0	19.69	0	13.5	8.75	0.25		2.13e-05	0.000129	0.0642697	0.387726
826	Eya2		0.383326	0.0169198	0.10165	SPIKE	27	0	11.81	0	10.5	6.75	0.75		2.14e-05	0.000129	0.0643382	0.387726
833	Fam110b		0.38316	0.0170498	0.10165	SPIKE	25	0	10.94	0	10.5	6.25	0.75		2.15e-05	0.000129	0.0648327	0.38812
861	Fastkd3		0.383187	0.0170498	0.10165	SPIKE	27	0	11.81	0	10.5	6.75	0.75		2.15e-05	0.000129	0.0647519	0.38812
994	Gm11952		0.383326	0.0169198	0.10165	NSPIKE	20	0	10	0	12	15	0.5		2.14e-05	0.000129	0.0643382	0.387726
1655	Man1c1		0.382766	0.0170898	0.10165	SPIKE	24	2	12.5	2	12.5	6	0.75		2.19e-05	0.00013	0.066018	0.392743
1812	Mypop		0.383443	0.0169198	0.10165	SPIKE	22	0	12.38	0	13.5	5.5	0.25		2.12e-05	0.000129	0.0639921	0.387726
1935	Nr4a3		0.383235	0.0169398	0.10165	SPIKE	27	0	11.81	0	10.5	6.75	0.75		2.14e-05	0.000129	0.0646074	0.38812
2397	Scrn3		0.383141	0.0170498	0.10165	SPIKE	32	24	8	18	6	8	0.5		2.15e-05	0.000129	0.0648888	0.38812
2768	Tlr6		0.382762	0.0170898	0.10165	SPIKE	18	6	16.12	8	21.5	4.5	0.25		2.19e-05	0.00013	0.0660299	0.392743
2970	Vash1		0.382859	0.0170498	0.10165	SPIKE	25	0	10.94	0	10.5	6.25	0.75		2.18e-05	0.00013	0.0657369	0.392459
908	Flrt3		0.38244	0.0174298	0.103288	SPIKE	27	0	11.81	0	10.5	6.75	0.75		2.22e-05	0.000132	0.0670133	0.397116
2265	Rbm12b1		0.382633	0.0174298	0.103288	SPIKE	22	0	12.38	0	13.5	5.5	0.25		2.2e-05	0.000131	0.0664227	0.394346
640	Dact2		0.382187	0.0179598	0.106154	SPIKE	18	0	9	0	12	3	0.5		2.25e-05	0.000133	0.0677975	0.40102
2604	Spata13		0.382061	0.0179798	0.106154	SPIKE	24	2	12.5	2	12.5	6	0.75		2.26e-05	0.000134	0.0681899	0.402597
221	Armt1		0.381606	0.0180898	0.106411	SPIKE	24	2	12.5	2	12.5	6	0.75		2.31e-05	0.000136	0.0696299	0.409588
2949	Unc13d		0.381696	0.0180698	0.106411	SPIKE	22	5.5	15.12	6	16.5	5.5	0.75		2.3e-05	0.000136	0.0693438	0.408656
31	4930562C15Rik		0.381151	0.0183498	0.107015	SPIKE	22	3.67	14.67	4	16	3.67	0.5		2.36e-05	0.000138	0.0710987	0.416696
538	Cmtm7		0.380767	0.0183598	0.107015	SPIKE	25	0	12.5	0	12	8.33	0.5		2.4e-05	0.00014	0.0723602	0.421772
758	Ece1		0.380876	0.0183498	0.107015	SPIKE	24	2	12.5	2	12.5	6	0.75		2.39e-05	0.00014	0.0719983	0.420428
1779	Muc6		0.38142	0.0183198	0.107015	SPIKE	24	12	0	12	0	8	0.5		2.33e-05	0.000137	0.0702277	0.412346
2286	Rela		0.381012	0.0183498	0.107015	SPIKE	18	0	9	0	12	3	0.5		2.37e-05	0.000139	0.0715522	0.418587
380	Ccdc141		0.379532	0.0196898	0.113584	SPIKE	32	24	8	18	6	8	0.5		2.54e-05	0.000147	0.0765608	0.443831
1929	Npy1r		0.379532	0.0196898	0.113584	SPIKE	18	0	9	0	12	3	0.5		2.54e-05	0.000147	0.0765608	0.443831
2022	Pcdhb4		0.379316	0.0196998	0.113584	SPIKE	22	0	12.38	0	13.5	5.5	0.25		2.57e-05	0.000148	0.0773199	0.445808
2250	Rangrf		0.379372	0.0196998	0.113584	SPIKE	29	12.08	24.77	10	20.5	7.25	0.75		2.56e-05	0.000148	0.0771227	0.445474
2340	Rpap3		0.379372	0.0196998	0.113584	SPIKE	18	6	16.12	8	21.5	4.5	0.25		2.56e-05	0.000148	0.0771227	0.445474
2913	Tti1		0.379847	0.0196498	0.113584	SPIKE	24	0	12	0	12	4	0.5		2.5e-05	0.000146	0.0754695	0.439095
414	Cd37		0.379092	0.0199098	0.113974	SPIKE	22	0	12.38	0	13.5	5.5	0.25		2.59e-05	0.000149	0.0781126	0.448762
780	Eml1		0.379052	0.0199098	0.113974	SPIKE	24	0	12	0	12	4	0.5		2.6e-05	0.000149	0.0782558	0.448779
798	Ephb6		0.378947	0.0199098	0.113974	SPIKE	27	0	11.81	0	10.5	6.75	0.75		2.61e-05	0.000149	0.078633	0.450135
2326	Rnf144b		0.379092	0.0199098	0.113974	NSPIKE	22	18.79	9.17	20.5	10	16.5	0.25		2.59e-05	0.000149	0.0781126	0.448762
81	Acox3		0.378605	0.0203298	0.115601	SPIKE	18	6	16.12	8	21.5	4.5	0.25		2.65e-05	0.000151	0.0798665	0.455567
114	Adcy7		0.377964	0.0206598	0.115601	SPIKE	24	12	0	12	0	8	0.5		2.73e-05	0.000153	0.0822282	0.462443
283	Bean1		0.377964	0.0206598	0.115601	SPIKE	24	14	0.5	14	0.5	6	0.75		2.73e-05	0.000153	0.0822282	0.462443
703	Dnah10		0.378289	0.0206298	0.115601	SPIKE	24	2	12.5	2	12.5	6	0.75		2.69e-05	0.000152	0.0810228	0.458311
1290	Gtf2h2		0.377819	0.0206598	0.115601	SPIKE	31	25.83	8.4	20	6.5	7.75	0.75		2.75e-05	0.000154	0.0827725	0.464654
1899	Nhs		0.378286	0.0206298	0.115601	SPIKE	22	3.67	14.67	4	16	5.5	0.5		2.69e-05	0.000152	0.081035	0.458311
1923	Nphs1		0.378286	0.0206298	0.115601	SPIKE	21	3.5	12.69	4	14.5	5.25	0.75		2.69e-05	0.000152	0.081035	0.458311
2019	Pcdh15		0.378286	0.0206298	0.115601	SPIKE	26	23.83	12.46	22	11.5	6.5	0.25		2.69e-05	0.000152	0.081035	0.458311
2370	Runx1		0.377964	0.0206598	0.115601	SPIKE	24	14	0.5	14	0.5	6	0.75		2.73e-05	0.000153	0.0822282	0.462443
2553	Slc9b1		0.378278	0.0206298	0.115601	SPIKE	23	1.92	13.42	2	14	7.67	0.5		2.69e-05	0.000152	0.0810637	0.458311
2623	Srsf9		0.377728	0.0206998	0.115601	SPIKE	24	0	12	0	12	4	0.5		2.76e-05	0.000154	0.0831151	0.464654
2719	Tdg-ps2		0.377706	0.0206998	0.115601	SPIKE	18	0	9	0	12	3	0.5		2.76e-05	0.000154	0.0831995	0.464654
2778	Tmem121		0.377705	0.0206998	0.115601	SPIKE	19	17.42	7.92	22	10	4.75	0.5		2.76e-05	0.000154	0.0832021	0.464654
2867	Trmt13		0.378774	0.0203298	0.115601	SPIKE	21	3.5	12.69	4	14.5	5.25	0.75		2.63e-05	0.00015	0.079255	0.452886
1992	Oxr1		0.377564	0.0210098	0.117128	SPIKE	24	16	4	16	4	6	0.5		2.78e-05	0.000155	0.0837391	0.466838
68	Abracl		0.376991	0.0211298	0.117184	NSPIKE	24	18	6	18	6	16	0.5		2.85e-05	0.000158	0.0859464	0.476652
805	Erg		0.377052	0.0211298	0.117184	SPIKE	25	0	10.94	0	10.5	6.25	0.75		2.84e-05	0.000158	0.0857063	0.476146
3055	Zc3h12c		0.37737	0.0211198	0.117184	SPIKE	28	0	12.25	0	10.5	7	0.75		2.8e-05	0.000156	0.0844782	0.47014
519	Chuk		0.375534	0.0220798	0.119149	SPIKE	23	3.83	13.9	4	14.5	5.75	0.75		3.05e-05	0.000164	0.0918078	0.495421
736	Dtwd1		0.375773	0.0220798	0.119149	SPIKE	19	15.83	7.52	20	9.5	4.75	0.25		3.01e-05	0.000163	0.0908208	0.491754
890	Fgd2		0.375773	0.0220798	0.119149	SPIKE	18	0	7.88	0	10.5	4.5	0.75		3.01e-05	0.000163	0.0908208	0.491754
895	Fgf11		0.376195	0.0219398	0.119149	SPIKE	27	0	11.81	0	10.5	6.75	0.75		2.96e-05	0.000162	0.089101	0.48739
1219	Gm8184		0.375773	0.0220798	0.119149	SPIKE	18	7.5	15.38	10	20.5	4.5	0.75		3.01e-05	0.000163	0.0908208	0.491754
1294	Gtpbp2		0.376428	0.0217898	0.119149	SPIKE	19	15.83	7.52	20	9.5	4.75	0.25		2.93e-05	0.00016	0.0881659	0.483101
1454	Kcna6		0.375899	0.0220598	0.119149	SPIKE	24	2	12.5	2	12.5	6	0.75		3e-05	0.000163	0.0903031	0.491754
1486	Kctd9		0.376796	0.0217598	0.119149	SPIKE	18	0	7.88	0	10.5	4.5	0.75		2.88e-05	0.000159	0.0867082	0.477955
2076	Pi4k2a		0.37555	0.0220798	0.119149	SPIKE	27	0	11.81	0	10.5	6.75	0.75		3.04e-05	0.000164	0.0917422	0.495421
2160	Ppp1r18		0.376428	0.0217898	0.119149	SPIKE	26	23.83	10.83	22	10	6.5	0.5		2.93e-05	0.00016	0.0881659	0.483101
2385	Sart3		0.376848	0.0215998	0.119149	SPIKE	18	0	9	0	12	3	0.5		2.87e-05	0.000159	0.0865049	0.477955
2401	Sdk2		0.376796	0.0217598	0.119149	SPIKE	27	9	24.19	8	21.5	6.75	0.25		2.88e-05	0.000159	0.0867082	0.477955
2503	Slc25a51		0.37674	0.0217598	0.119149	SPIKE	23	5.75	17.25	6	18	5.75	0.5		2.89e-05	0.000159	0.0869281	0.477955
2515	Slc30a5		0.376753	0.0217598	0.119149	SPIKE	23	3.83	13.9	4	14.5	5.75	0.75		2.88e-05	0.000159	0.0868776	0.477955
2672	Synj2		0.375773	0.0220798	0.119149	SPIKE	32	24	10	18	7.5	8	0.25		3.01e-05	0.000163	0.0908208	0.491754
3121	Zfp553		0.376062	0.0219398	0.119149	SPIKE	32	24	8	18	6	8	0.5		2.98e-05	0.000162	0.0896388	0.489495
134	Ago1		0.374964	0.0225798	0.121031	SPIKE	30	0	13.12	0	10.5	7.5	0.75		3.13e-05	0.000167	0.0942021	0.503182
1282	Grk6		0.375347	0.0225198	0.121031	SPIKE	24	0	12	0	12	4	0.5		3.07e-05	0.000166	0.0925871	0.498786
1856	Nasp		0.37506	0.0225498	0.121031	SPIKE	35	2.92	20.42	2	14	8.75	0.5		3.11e-05	0.000167	0.093795	0.503182
2357	Rrm2b		0.375154	0.0225498	0.121031	SPIKE	32	8	24	6	18	5.33	0.5		3.1e-05	0.000167	0.0933957	0.502296
515	Chst15		0.374783	0.0229398	0.121535	SPIKE	18	12	1.88	16	2.5	4.5	0.75		3.15e-05	0.000167	0.0949756	0.503182
859	Fancl		0.374783	0.0229398	0.121535	SPIKE	25	0	10.94	0	10.5	6.25	0.75		3.15e-05	0.000167	0.0949756	0.503182
1904	Nkain2		0.374804	0.0229398	0.121535	NSPIKE	33	13.75	30.25	10	22	27.5	0.5		3.15e-05	0.000167	0.0948857	0.503182
1953	Nupr1l		0.374783	0.0229398	0.121535	SPIKE	32	8	26	6	19.5	8	0.25		3.15e-05	0.000167	0.0949756	0.503182
1959	Oas1a		0.374824	0.0229398	0.121535	SPIKE	24	2	12.5	2	12.5	6	0.75		3.15e-05	0.000167	0.0947985	0.503182
1991	Ovol1		0.374783	0.0229398	0.121535	SPIKE	35	0	19.69	0	13.5	8.75	0.25		3.15e-05	0.000167	0.0949756	0.503182
2195	Psd4		0.374783	0.0229398	0.121535	SPIKE	19	6.33	14.65	8	18.5	4.75	0.75		3.15e-05	0.000167	0.0949756	0.503182
673	Ddx51		0.373675	0.0236598	0.123666	SPIKE	25	4.17	16.67	4	16	8.33	0.5		3.31e-05	0.000175	0.0998375	0.525798
712	Dnajc28		0.373834	0.0236598	0.123666	SPIKE	26	23.83	12.46	22	11.5	6.5	0.25		3.29e-05	0.000174	0.0991266	0.523441
1374	Igfbp2		0.373299	0.0236898	0.123666	SPIKE	27	0	11.81	0	10.5	6.75	0.75		3.37e-05	0.000176	0.101541	0.53007
1629	Lrrc8c		0.373317	0.0236898	0.123666	SPIKE	20	6.67	15.42	8	18.5	5	0.75		3.37e-05	0.000176	0.101456	0.53007
1857	Nbas		0.374124	0.0234698	0.123666	NSPIKE	20	3.75	15	4.5	18	15	0.25		3.25e-05	0.000172	0.0978383	0.517492
2329	Rnf20		0.373601	0.0236898	0.123666	ACOS	33	0	0	0	0	33	0		3.32e-05	0.000175	0.10017	0.525798
2575	Smoc2		0.373355	0.0236898	0.123666	NSPIKE	28	16.92	4.67	14.5	4	21	0.25		3.36e-05	0.000176	0.101285	0.53007
2742	Tfip11		0.373588	0.0236898	0.123666	SPIKE	18	9	16.88	12	22.5	4.5	0.75		3.33e-05	0.000175	0.10023	0.525798
3174	Zfp949		0.373588	0.0236898	0.123666	SPIKE	22	0	12.38	0	13.5	5.5	0.25		3.33e-05	0.000175	0.10023	0.525798
1784	Myb		0.373073	0.0241998	0.126123	SPIKE	18	6	15	8	20	6	0.5		3.4e-05	0.000177	0.102575	0.534592
1523	Kremen1		0.372463	0.0246998	0.128102	SPIKE	27	0	11.81	0	10.5	6.75	0.75		3.5e-05	0.000181	0.105424	0.546769
2276	Rcc1		0.372683	0.0246998	0.128102	SPIKE	35	0	19.69	0	13.5	8.75	0.25		3.46e-05	0.00018	0.104391	0.54317
2929	Twist2		0.372497	0.0246998	0.128102	SPIKE	18	3	10.88	4	14.5	4.5	0.75		3.49e-05	0.000181	0.105264	0.546769
1470	Kcnk4		0.371855	0.0251697	0.130166	SPIKE	24	2	12.5	2	12.5	6	0.75		3.6e-05	0.000186	0.108338	0.560895
2232	Qsox1		0.371786	0.0252197	0.130166	SPIKE	32	24	8	18	6	8	0.5		3.61e-05	0.000186	0.108673	0.560895
2537	Slc4a1ap		0.371786	0.0252197	0.130166	SPIKE	24	12	0	12	0	8	0.5		3.61e-05	0.000186	0.108673	0.560895
560	Col25a1		0.371213	0.0254797	0.130875	SPIKE	28	0	12.25	0	10.5	7	0.75		3.7e-05	0.00019	0.111498	0.572703
1942	Nsun7		0.371366	0.0254797	0.130875	SPIKE	24	2	14	2	14	6	0.5		3.68e-05	0.000189	0.110739	0.569717
3067	Zfand1		0.371457	0.0254797	0.130875	SPIKE	32	24	8	18	6	8	0.5		3.66e-05	0.000189	0.110288	0.568311
458	Cenpc1		0.371002	0.0258597	0.132614	SPIKE	26	23.83	10.83	22	10	6.5	0.5		3.74e-05	0.000192	0.112553	0.577195
1213	Gm773		0.370828	0.0263997	0.135167	SPIKE	35	0	19.69	0	13.5	8.75	0.25		3.76e-05	0.000193	0.113431	0.580769
60	Abcc4		0.368786	0.0279197	0.135368	SPIKE	19	6.33	14.65	8	18.5	4.75	0.75		4.12e-05	0.0002	0.124244	0.602397
71	Acaa1b		0.3707	0.0267497	0.135368	SPIKE	24	14	0.5	14	0.5	6	0.75		3.79e-05	0.000194	0.114086	0.583186
130	Agbl2		0.370389	0.0269697	0.135368	SPIKE	32	24	8	18	6	10.67	0.5		3.84e-05	0.000195	0.115678	0.588506
147	Aldh1a7		0.369737	0.0274797	0.135368	SPIKE	24	2	12.5	2	12.5	6	0.75		3.95e-05	0.000197	0.119095	0.593618
182	Ap5z1		0.368789	0.0279197	0.135368	SPIKE	22	3.67	13.29	4	14.5	5.5	0.75		4.12e-05	0.0002	0.124228	0.602397
316	C4b		0.370031	0.0271597	0.135368	ACOS	28	25.67	7	22	6	28	0.67		3.9e-05	0.000197	0.117541	0.593618
324	Cabp1		0.369336	0.0275497	0.135368	SPIKE	24	2	12.5	2	12.5	6	0.75		4.02e-05	0.000199	0.121244	0.600588
606	Ctso		0.369787	0.0272197	0.135368	SPIKE	25	0	10.94	0	10.5	6.25	0.75		3.94e-05	0.000197	0.118829	0.593618
906	Fktn		0.369987	0.0271597	0.135368	SPIKE	24	0	13.5	0	13.5	6	0.25		3.91e-05	0.000197	0.117774	0.593618
997	Gm13118		0.369821	0.0271597	0.135368	SPIKE	29	24.17	11.48	20	9.5	7.25	0.25		3.94e-05	0.000197	0.118651	0.593618
1200	Gm6206		0.370602	0.0267497	0.135368	NSPIKE	28	19.25	7	16.5	6	21	0.25		3.8e-05	0.000194	0.114586	0.584553
1332	Hipk1		0.36889	0.0279197	0.135368	NSPIKE	19	11.48	3.17	14.5	4	14.25	0.25		4.1e-05	0.0002	0.123671	0.602397
1449	Katnbl1		0.370576	0.0267497	0.135368	SPIKE	35	8.75	24.06	6	16.5	8.75	0.75		3.81e-05	0.000194	0.114719	0.584553
1526	Krt18		0.369117	0.0279197	0.135368	SPIKE	25	0	10.94	0	10.5	6.25	0.75		4.06e-05	0.0002	0.122429	0.602397
1539	Lat		0.368786	0.0279197	0.135368	SPIKE	23	7.67	19.17	8	20	3.83	0.5		4.12e-05	0.0002	0.124244	0.602397
1658	Map3k11		0.369821	0.0271597	0.135368	SPIKE	34	28.33	13.46	20	9.5	8.5	0.25		3.94e-05	0.000197	0.118651	0.593618
1681	Mcm3		0.368786	0.0279197	0.135368	SPIKE	32	24	10	18	7.5	8	0.25		4.12e-05	0.0002	0.124244	0.602397
1926	Nptx2		0.369117	0.0279197	0.135368	SPIKE	18	6	16.12	8	21.5	4.5	0.25		4.06e-05	0.0002	0.122429	0.602397
2156	Ppp1r12b		0.369199	0.0275497	0.135368	SPIKE	30	27.5	12.5	22	10	7.5	0.5		4.05e-05	0.0002	0.121983	0.602385
2167	Pradc1		0.369757	0.0272197	0.135368	SPIKE	24	0	12	0	12	4	0.5		3.95e-05	0.000197	0.118991	0.593618
2186	Prokr2		0.368786	0.0279197	0.135368	SPIKE	25	0	10.94	0	10.5	6.25	0.75		4.12e-05	0.0002	0.124244	0.602397
2256	Rasal1		0.369542	0.0275197	0.135368	SPIKE	24	0	10.5	0	10.5	6	0.75		3.99e-05	0.000198	0.120134	0.596939
2328	Rnf19b		0.370243	0.0269697	0.135368	SPIKE	34	28.33	9.21	20	6.5	8.5	0.75		3.86e-05	0.000196	0.116436	0.59142
2411	Sema3g		0.369821	0.0271597	0.135368	SPIKE	22	0	12.38	0	13.5	5.5	0.25		3.94e-05	0.000197	0.118651	0.593618
2428	Serping1		0.37014	0.0269997	0.135368	SPIKE	32	24	8	18	6	8	0.5		3.88e-05	0.000197	0.116972	0.592265
2502	Slc25a48		0.368786	0.0279197	0.135368	SPIKE	32	24	6	18	4.5	8	0.75		4.12e-05	0.0002	0.124244	0.602397
2681	Tacc3		0.369787	0.0272197	0.135368	SPIKE	18	6	16.12	8	21.5	4.5	0.25		3.94e-05	0.000197	0.118829	0.593618
2845	Trim15		0.369274	0.0275497	0.135368	SPIKE	18	0	9	0	12	3	0.5		4.03e-05	0.0002	0.121574	0.601292
2846	Trim21		0.368856	0.0279197	0.135368	SPIKE	18	7.5	15.38	10	20.5	4.5	0.75		4.11e-05	0.0002	0.123862	0.602397
2906	Ttc29		0.368786	0.0279197	0.135368	SPIKE	18	6	16.12	8	21.5	4.5	0.25		4.12e-05	0.0002	0.124244	0.602397
2908	Ttc38		0.370176	0.0269997	0.135368	SPIKE	26	23.83	12.46	22	11.5	6.5	0.25		3.88e-05	0.000197	0.116787	0.592262
2923	Tube1		0.369504	0.0275197	0.135368	SPIKE	34	2.83	19.83	2	14	8.5	0.5		3.99e-05	0.000198	0.120335	0.597013
2985	Vsig10l		0.368786	0.0279197	0.135368	SPIKE	27	2.25	14.06	2	12.5	6.75	0.75		4.12e-05	0.0002	0.124244	0.602397
3172	Zfp94		0.369787	0.0272197	0.135368	SPIKE	26	21.67	10.29	20	9.5	6.5	0.25		3.94e-05	0.000197	0.118829	0.593618
3199	Zzef1		0.369672	0.0275197	0.135368	SPIKE	20	5	13.75	6	16.5	5	0.75		3.96e-05	0.000197	0.119439	0.59441
2598	Sowaha		0.368652	0.0279697	0.135406	SPIKE	18	16.5	7.5	22	10	6	0.5		4.15e-05	0.000201	0.124986	0.605074
622	Cyp2j5		0.36849	0.0285497	0.137589	SPIKE	24	0	12	0	12	4	0.5		4.18e-05	0.000201	0.12589	0.606699
1161	Gm41949		0.36849	0.0285497	0.137589	SPIKE	20	8.33	17.08	10	20.5	5	0.75		4.18e-05	0.000201	0.12589	0.606699
1504	Kirrel2		0.36849	0.0285497	0.137589	SPIKE	24	0	12	0	12	4	0.5		4.18e-05	0.000201	0.12589	0.606699
497	Cflar		0.36839	0.0288197	0.138473	SPIKE	27	0	11.81	0	10.5	6.75	0.75		4.2e-05	0.000202	0.126449	0.608478
1009	Gm15446		0.368338	0.0288197	0.138473	NSPIKE	32	0	16	0	12	21.33	0.5		4.21e-05	0.000202	0.126745	0.608985
2460	Shmt1		0.368276	0.0288697	0.138505	SPIKE	26	0	14.62	0	13.5	6.5	0.25		4.22e-05	0.000202	0.127095	0.609752
77	Acot11		0.367614	0.0292997	0.139939	SPIKE	24	2	12.5	2	12.5	6	0.75		4.34e-05	0.000208	0.130881	0.626036
1406	Inpp5b		0.367614	0.0292997	0.139939	SPIKE	24	2	12.5	2	12.5	6	0.75		4.34e-05	0.000208	0.130881	0.626036
2780	Tmem138		0.367529	0.0292997	0.139939	SPIKE	21	3.5	12.69	4	14.5	5.25	0.75		4.36e-05	0.000208	0.131377	0.62747
55	Abcb1b		0.365148	0.0316297	0.141165	SPIKE	20	6.67	15.42	8	18.5	5	0.75		4.84e-05	0.000216	0.145957	0.651412
118	Adgrg5		0.365148	0.0316297	0.141165	SPIKE	24	0	12	0	12	4	0.5		4.84e-05	0.000216	0.145957	0.651412
121	Adora2a		0.365148	0.0316297	0.141165	SPIKE	24	6	16.5	6	16.5	6	0.75		4.84e-05	0.000216	0.145957	0.651412
230	Asb14		0.365148	0.0316297	0.141165	SPIKE	20	6.67	15.42	8	18.5	5	0.75		4.84e-05	0.000216	0.145957	0.651412
307	Bub1		0.365148	0.0316297	0.141165	SPIKE	20	5	13.75	6	16.5	5	0.75		4.84e-05	0.000216	0.145957	0.651412
451	Cdon		0.365148	0.0316297	0.141165	SPIKE	20	5	13.75	6	16.5	5	0.75		4.84e-05	0.000216	0.145957	0.651412
462	Cenpm		0.365148	0.0316297	0.141165	SPIKE	20	5	13.75	6	16.5	5	0.75		4.84e-05	0.000216	0.145957	0.651412
482	Cfap100		0.365148	0.0316297	0.141165	SPIKE	28	0	14	0	12	7	0.5		4.84e-05	0.000216	0.145957	0.651412
520	Cib4		0.365624	0.0312097	0.141165	SPIKE	22	3.67	13.29	4	14.5	5.5	0.75		4.74e-05	0.000216	0.14293	0.651412
574	Cpa6		0.365148	0.0316297	0.141165	SPIKE	24	0	12	0	12	4	0.5		4.84e-05	0.000216	0.145957	0.651412
624	Cyp2j8		0.365148	0.0316297	0.141165	SPIKE	24	0	12	0	12	4	0.5		4.84e-05	0.000216	0.145957	0.651412
637	D830024N08Rik		0.365148	0.0316297	0.141165	SPIKE	28	0	14	0	12	7	0.5		4.84e-05	0.000216	0.145957	0.651412
650	Dcaf6		0.366265	0.0310297	0.141165	SPIKE	30	27.5	12.5	22	10	7.5	0.5		4.61e-05	0.000216	0.138941	0.651412
678	Dennd2d		0.365148	0.0316297	0.141165	SPIKE	20	5	13.75	6	16.5	5	0.75		4.84e-05	0.000216	0.145957	0.651412
688	Dhx57		0.367116	0.0301097	0.141165	SPIKE	32	24	8	18	6	8	0.5		4.44e-05	0.000212	0.133801	0.63768
834	Fam117a		0.365148	0.0316297	0.141165	SPIKE	24	2	12.5	2	12.5	6	0.75		4.84e-05	0.000216	0.145957	0.651412
867	Fbrsl1		0.366911	0.0301397	0.141165	SPIKE	29	24.17	11.48	20	9.5	7.25	0.25		4.48e-05	0.000213	0.135025	0.642023
928	Fpgt		0.365148	0.0316297	0.141165	SPIKE	24	2	12.5	2	12.5	6	0.75		4.84e-05	0.000216	0.145957	0.651412
1013	Gm15867		0.365642	0.0312097	0.141165	SPIKE	35	8.75	26.25	6	18	11.67	0.5		4.74e-05	0.000216	0.142815	0.651412
1191	Gm52502		0.365148	0.0316297	0.141165	SPIKE	24	6	16.5	6	16.5	6	0.75		4.84e-05	0.000216	0.145957	0.651412
1208	Gm7361		0.365148	0.0316297	0.141165	SPIKE	20	6.67	15.42	8	18.5	5	0.75		4.84e-05	0.000216	0.145957	0.651412
1228	Gm9182		0.367098	0.0301097	0.141165	SPIKE	20	5	16.25	6	19.5	5	0.25		4.44e-05	0.000212	0.133913	0.63768
1326	Hgf		0.365148	0.0316297	0.141165	SPIKE	20	0	8.75	0	10.5	5	0.75		4.84e-05	0.000216	0.145957	0.651412
1571	Lmf1		0.366642	0.0301397	0.141165	SPIKE	23	1.92	13.42	2	14	5.75	0.5		4.54e-05	0.000215	0.13664	0.648738
1588	LOC118567481		0.365148	0.0316297	0.141165	SPIKE	28	0	14	0	12	7	0.5		4.84e-05	0.000216	0.145957	0.651412
1594	LOC118568080		0.365148	0.0316297	0.141165	SPIKE	28	0	14	0	12	7	0.5		4.84e-05	0.000216	0.145957	0.651412
1601	LOC118568701		0.365148	0.0316297	0.141165	SPIKE	24	0	12	0	12	4	0.5		4.84e-05	0.000216	0.145957	0.651412
1628	Lrrc75b		0.365366	0.0312297	0.141165	SPIKE	18	0	9	0	12	3	0.5		4.8e-05	0.000216	0.144566	0.651412
1692	Mecr		0.365512	0.0312297	0.141165	SPIKE	32	8	24	6	18	10.67	0.5		4.77e-05	0.000216	0.143636	0.651412
1721	Milr1		0.365148	0.0316297	0.141165	SPIKE	28	0	14	0	12	7	0.5		4.84e-05	0.000216	0.145957	0.651412
1757	Mro		0.365148	0.0316297	0.141165	SPIKE	20	0	8.75	0	10.5	5	0.75		4.84e-05	0.000216	0.145957	0.651412
1763	Msr1		0.365148	0.0316297	0.141165	SPIKE	20	0	8.75	0	10.5	5	0.75		4.84e-05	0.000216	0.145957	0.651412
1905	Nlgn4l		0.365148	0.0316297	0.141165	SPIKE	24	0	12	0	12	4	0.5		4.84e-05	0.000216	0.145957	0.651412
2193	Prrxl1		0.365148	0.0316297	0.141165	SPIKE	24	0	12	0	12	4	0.5		4.84e-05	0.000216	0.145957	0.651412
2320	Rn4.5s		0.366414	0.0303997	0.141165	NSPIKE	24	21.5	8	21.5	8	18	0.75		4.58e-05	0.000216	0.138025	0.651412
2371	Runx2		0.365148	0.0316297	0.141165	SPIKE	20	5	13.75	6	16.5	5	0.75		4.84e-05	0.000216	0.145957	0.651412
2466	Siglech		0.365884	0.0310397	0.141165	SPIKE	18	0	7.88	0	10.5	4.5	0.75		4.69e-05	0.000216	0.141296	0.651412
2484	Slc14a2		0.365148	0.0316297	0.141165	SPIKE	20	0	8.75	0	10.5	5	0.75		4.84e-05	0.000216	0.145957	0.651412
2543	Slc6a3		0.365148	0.0316297	0.141165	SPIKE	20	8.33	17.08	10	20.5	5	0.75		4.84e-05	0.000216	0.145957	0.651412
2628	St3gal1		0.365148	0.0316297	0.141165	SPIKE	20	6.67	15.42	8	18.5	5	0.75		4.84e-05	0.000216	0.145957	0.651412
2650	Stk33		0.365366	0.0312297	0.141165	SPIKE	19	6.33	15.83	8	20	3.17	0.5		4.8e-05	0.000216	0.144566	0.651412
2706	Tbr1		0.365148	0.0316297	0.141165	SPIKE	28	0	14	0	12	7	0.5		4.84e-05	0.000216	0.145957	0.651412
2714	Tcp10c		0.365148	0.0316297	0.141165	SPIKE	24	2	12.5	2	12.5	6	0.75		4.84e-05	0.000216	0.145957	0.651412
2800	Tmem273		0.365282	0.0316297	0.141165	SPIKE	32	24	8	18	6	8	0.5		4.82e-05	0.000216	0.145101	0.651412
2819	Tomt		0.365148	0.0316297	0.141165	SPIKE	20	5	13.75	6	16.5	5	0.75		4.84e-05	0.000216	0.145957	0.651412
2963	Utp25		0.366281	0.0310297	0.141165	SPIKE	24	0	12	0	12	4	0.5		4.61e-05	0.000216	0.138842	0.651412
3198	Zwilch		0.365366	0.0312297	0.141165	SPIKE	18	6	15	8	20	3	0.5		4.8e-05	0.000216	0.144566	0.651412
537	Cmtm3		0.364833	0.0319897	0.141328	SPIKE	28	0	14	0	12	7	0.5		4.91e-05	0.000218	0.148001	0.655917
1118	Gm32856		0.364833	0.0319897	0.141328	SPIKE	20	6.67	15.42	8	18.5	5	0.75		4.91e-05	0.000218	0.148001	0.655917
2346	Rprm		0.36474	0.0320197	0.141328	SPIKE	27	9	24.19	8	21.5	6.75	0.25		4.93e-05	0.000218	0.148606	0.655917
2471	Sirt1		0.364982	0.0319697	0.141328	NSPIKE	22	18.79	9.17	20.5	10	16.5	0.25		4.88e-05	0.000217	0.147033	0.655298
2588	Snx21		0.36492	0.0319697	0.141328	SPIKE	18	7.5	15.38	10	20.5	4.5	0.75		4.89e-05	0.000218	0.147431	0.655917
2630	St6gal2		0.364757	0.0320197	0.141328	SPIKE	25	0	10.94	0	10.5	6.25	0.75		4.93e-05	0.000218	0.148495	0.655917
2657	Stpg4		0.364757	0.0320197	0.141328	SPIKE	18	0	7.88	0	10.5	4.5	0.75		4.93e-05	0.000218	0.148495	0.655917
2935	Uaca		0.364833	0.0319897	0.141328	SPIKE	24	0	12	0	12	4	0.5		4.91e-05	0.000218	0.148001	0.655917
579	Cpne3		0.36424	0.0326697	0.143014	SPIKE	21	3.5	12.69	4	14.5	5.25	0.75		5.04e-05	0.000221	0.15191	0.665655
1139	Gm36722		0.364218	0.0326697	0.143014	SPIKE	32	16	0	12	0	8	0.5		5.05e-05	0.000221	0.152061	0.665655
1186	Gm4960		0.364218	0.0326697	0.143014	SPIKE	32	16	0	12	0	8	0.5		5.05e-05	0.000221	0.152061	0.665655
1306	Hapln1		0.364218	0.0326697	0.143014	SPIKE	18	0	9	0	12	3	0.5		5.05e-05	0.000221	0.152061	0.665655
1678	Mbtd1		0.364448	0.0326697	0.143014	SPIKE	24	2	14	2	14	6	0.5		5e-05	0.00022	0.150532	0.663502
3110	Zfp444		0.364218	0.0326697	0.143014	SPIKE	18	0	9	0	12	3	0.5		5.05e-05	0.000221	0.152061	0.665655
502	Chdh		0.364154	0.0328397	0.143366	SPIKE	23	1.92	13.42	2	14	7.67	0.5		5.06e-05	0.000221	0.152488	0.666616
910	Flt3		0.364082	0.0328397	0.143366	SPIKE	22	3.67	14.67	4	16	5.5	0.5		5.08e-05	0.000222	0.15297	0.667808
205	Arhgap8		0.36279	0.0339197	0.143765	SPIKE	18	12	1.88	16	2.5	4.5	0.75		5.37e-05	0.000228	0.1619	0.687246
251	Atr		0.363707	0.0332597	0.143765	SPIKE	27	0	11.81	0	10.5	6.75	0.75		5.16e-05	0.000224	0.15551	0.676371
294	Boc		0.363832	0.0332597	0.143765	SPIKE	27	0	11.81	0	10.5	6.75	0.75		5.13e-05	0.000224	0.154659	0.674264
336	Calcb		0.36279	0.0339197	0.143765	SPIKE	24	12	1.5	12	1.5	6	0.25		5.37e-05	0.000228	0.1619	0.687246
1014	Gm16010		0.36279	0.0339197	0.143765	SPIKE	32	26.67	8.67	20	6.5	8	0.75		5.37e-05	0.000228	0.1619	0.687246
1102	Gm29890		0.36279	0.0339197	0.143765	SPIKE	18	6	16.12	8	21.5	4.5	0.25		5.37e-05	0.000228	0.1619	0.687246
1192	Gm5265		0.363372	0.0337197	0.143765	SPIKE	24	2	12.5	2	12.5	6	0.75		5.24e-05	0.000227	0.157816	0.682564
1308	Hapln3		0.36279	0.0339197	0.143765	SPIKE	18	12	1.88	16	2.5	4.5	0.75		5.37e-05	0.000228	0.1619	0.687246
1351	Hsd17b7		0.36279	0.0339197	0.143765	SPIKE	18	0	7.88	0	10.5	4.5	0.75		5.37e-05	0.000228	0.1619	0.687246
1379	Ikbkg		0.36279	0.0339197	0.143765	SPIKE	30	5	21.88	4	17.5	7.5	0.25		5.37e-05	0.000228	0.1619	0.687246
1586	LOC118567348		0.36279	0.0339197	0.143765	SPIKE	35	0	19.69	0	13.5	8.75	0.25		5.37e-05	0.000228	0.1619	0.687246
1723	Mios		0.363699	0.0332597	0.143765	SPIKE	28	0	12.25	0	10.5	7	0.75		5.16e-05	0.000224	0.155565	0.676371
1808	Myo9b		0.36279	0.0339197	0.143765	SPIKE	32	26.67	8.67	20	6.5	8	0.75		5.37e-05	0.000228	0.1619	0.687246
1996	P2ry1		0.362755	0.0339197	0.143765	NSPIKE	24	18	6	18	6	16	0.5		5.38e-05	0.000228	0.162147	0.687246
2028	Pcp2		0.363109	0.0337397	0.143765	SPIKE	28	14	0	12	0	7	0.5		5.3e-05	0.000228	0.159649	0.687246
2090	Pim1		0.36279	0.0339197	0.143765	SPIKE	24	16	2.5	16	2.5	6	0.75		5.37e-05	0.000228	0.1619	0.687246
2161	Ppp1r37		0.363372	0.0337197	0.143765	SPIKE	20	6.67	15.42	8	18.5	5	0.75		5.24e-05	0.000227	0.157816	0.682564
2220	Pus1		0.362761	0.0339197	0.143765	SPIKE	32	24	8	18	6	8	0.5		5.38e-05	0.000228	0.162103	0.687246
2417	Serhl		0.363372	0.0337197	0.143765	SPIKE	24	2	12.5	2	12.5	6	0.75		5.24e-05	0.000227	0.157816	0.682564
2534	Slc43a3		0.36279	0.0339197	0.143765	SPIKE	25	0	10.94	0	10.5	6.25	0.75		5.37e-05	0.000228	0.1619	0.687246
3061	Zcchc9		0.363368	0.0337197	0.143765	NSPIKE	27	19.69	4.5	17.5	4	20.25	0.75		5.24e-05	0.000227	0.157843	0.682564
3062	Zcwpw1		0.363109	0.0337397	0.143765	SPIKE	20	5	13.75	6	16.5	5	0.75		5.3e-05	0.000228	0.159649	0.687246
1197	Gm5673		0.362716	0.0341197	0.144422	ACOS	26	13	8.67	12	8	26	0.17		5.39e-05	0.000228	0.162421	0.687496
880	Fbxo42		0.362178	0.0346097	0.144772	SPIKE	18	0	9	0	12	3	0.5		5.52e-05	0.000231	0.166295	0.697437
947	Galnt13		0.362274	0.0346097	0.144772	NSPIKE	28	19.25	7	16.5	6	21	0.25		5.5e-05	0.000231	0.1656	0.696347
1109	Gm31513		0.362349	0.0346097	0.144772	SPIKE	24	12	0	12	0	8	0.5		5.48e-05	0.000231	0.165057	0.694976
1636	Lsm2		0.362223	0.0346097	0.144772	SPIKE	31	25.83	8.4	20	6.5	7.75	0.75		5.51e-05	0.000231	0.165969	0.696982
1716	Mia2		0.36244	0.0346097	0.144772	NSPIKE	24	20	8	20	8	20	0.5		5.46e-05	0.00023	0.164397	0.69311
2279	Rcor3		0.362631	0.0344297	0.144772	ACOS	19	7.92	9.5	10	12	19	0.92		5.41e-05	0.000229	0.163028	0.689156
2319	Rmdn2		0.362559	0.0344297	0.144772	SPIKE	29	24.17	11.48	20	9.5	7.25	0.25		5.43e-05	0.000229	0.163544	0.690425
2751	Thada		0.362046	0.0346097	0.144772	SPIKE	18	7.5	15.38	10	20.5	4.5	0.75		5.55e-05	0.000232	0.167261	0.699652
2786	Tmem185b		0.362046	0.0346097	0.144772	SPIKE	26	23.83	10.83	22	10	6.5	0.5		5.55e-05	0.000232	0.167261	0.699652
491	Cfap69		0.361463	0.0359696	0.150265	SPIKE	19	6.33	15.83	8	20	4.75	0.5		5.69e-05	0.000238	0.171574	0.71676
32	4931414P19Rik		0.361287	0.0363996	0.151468	SPIKE	32	24	8	18	6	8	0.5		5.74e-05	0.000239	0.172895	0.71961
236	Asxl1		0.361283	0.0363996	0.151468	SPIKE	26	23.83	12.46	22	11.5	6.5	0.25		5.74e-05	0.000239	0.172931	0.71961
1314	Hcrtr2		0.361287	0.0363996	0.151468	SPIKE	32	16	0	12	0	8	0.5		5.74e-05	0.000239	0.172895	0.71961
626	Cyp4f16		0.360758	0.0367696	0.152413	NSPIKE	28	19.25	7	16.5	6	21	0.25		5.87e-05	0.000243	0.176938	0.733423
1347	Hpgd		0.360877	0.0367696	0.152413	NSPIKE	18	6.38	16.5	8.5	22	13.5	0.25		5.84e-05	0.000242	0.176016	0.730546
3084	Zfp235		0.36094	0.0367696	0.152413	SPIKE	34	25.5	10.62	18	7.5	8.5	0.25		5.83e-05	0.000242	0.175539	0.729512
809	Ermard		0.360492	0.0369896	0.152897	SPIKE	35	5.83	23.33	4	16	8.75	0.5		5.94e-05	0.000246	0.178998	0.741002
2420	Serpina1b		0.360448	0.0369996	0.152897	SPIKE	27	0	11.81	0	10.5	6.75	0.75		5.95e-05	0.000246	0.179343	0.74147
2491	Slc19a3		0.360414	0.0370296	0.152897	SPIKE	18	6	16.12	8	21.5	4.5	0.25		5.96e-05	0.000246	0.179611	0.741618
1643	Ly86		0.360065	0.0373096	0.153854	NSPIKE	28	16.33	2.33	14	2	21	0.5		6.05e-05	0.00025	0.182362	0.752008
139	Aifm3		0.359546	0.0379996	0.156297	SPIKE	24	12	0	12	0	8	0.5		6.19e-05	0.000255	0.18652	0.767178
233	Aspg		0.359573	0.0379996	0.156297	NSPIKE	20	0	10	0	12	15	0.5		6.18e-05	0.000255	0.186301	0.767178
296	Brat1		0.359025	0.0389396	0.15963	SPIKE	27	0	11.81	0	10.5	6.75	0.75		6.33e-05	0.00026	0.190796	0.782751
896	Fgf2		0.359405	0.0388696	0.15963	SPIKE	23	1.92	11.98	2	12.5	5.75	0.75		6.23e-05	0.000256	0.187667	0.770904
2223	Pusl1		0.358842	0.0390096	0.15963	SPIKE	24	0	12	0	12	4	0.5		6.38e-05	0.000262	0.192313	0.787966
2811	Tnks1bp1		0.358685	0.0390096	0.15963	SPIKE	32	24	8	18	6	8	0.5		6.43e-05	0.000263	0.193627	0.792337
604	Ctf1		0.358296	0.0393796	0.16012	SPIKE	24	12	0	12	0	8	0.5		6.54e-05	0.000266	0.196924	0.800708
1443	Jmjd4		0.358296	0.0393796	0.16012	SPIKE	20	18.33	7.08	22	8.5	5	0.75		6.54e-05	0.000266	0.196924	0.800708
2054	Per2		0.358483	0.0393096	0.16012	ACOS	28	2.33	2.33	2	2	28	0		6.48e-05	0.000265	0.19533	0.798283
2365	Rtp2		0.358296	0.0393796	0.16012	SPIKE	24	12	0	12	0	8	0.5		6.54e-05	0.000266	0.196924	0.800708
2959	Usp37		0.358367	0.0393096	0.16012	SPIKE	21	3.5	12.69	4	14.5	5.25	0.75		6.52e-05	0.000266	0.196316	0.800708
28	4930503L19Rik		0.356966	0.0416596	0.160645	SPIKE	18	0	7.88	0	10.5	4.5	0.75		6.92e-05	0.000268	0.20858	0.808258
29	4930523C07Rik		0.356966	0.0416596	0.160645	SPIKE	19	15.83	7.52	20	9.5	4.75	0.25		6.92e-05	0.000268	0.20858	0.808258
40	9230110K08Rik		0.356966	0.0416596	0.160645	SPIKE	35	32.08	12.4	22	8.5	8.75	0.75		6.92e-05	0.000268	0.20858	0.808258
41	9430053O09Rik		0.356966	0.0416596	0.160645	SPIKE	29	4.83	21.15	4	17.5	7.25	0.25		6.92e-05	0.000268	0.20858	0.808258
83	Acp4		0.356793	0.0418596	0.160645	SPIKE	18	10.5	1.5	14	2	4.5	0.5		6.97e-05	0.000268	0.210147	0.808258
98	Adal		0.3577	0.0402596	0.160645	SPIKE	26	23.83	10.83	22	10	6.5	0.5		6.71e-05	0.000268	0.202065	0.808258
120	Adhfe1		0.356172	0.0421996	0.160645	NSPIKE	29	18.73	2.42	15.5	2	21.75	0.75		7.16e-05	0.000274	0.215851	0.825238
124	Aebp1		0.356966	0.0416596	0.160645	SPIKE	32	24	10	18	7.5	8	0.25		6.92e-05	0.000268	0.20858	0.808258
159	Ankmy1		0.356966	0.0416596	0.160645	SPIKE	34	28.33	9.21	20	6.5	8.5	0.75		6.92e-05	0.000268	0.20858	0.808258
200	Arhgap25		0.356966	0.0416596	0.160645	SPIKE	18	0	7.88	0	10.5	4.5	0.75		6.92e-05	0.000268	0.20858	0.808258
313	C2cd4b		0.356793	0.0418596	0.160645	SPIKE	18	12	1.88	16	2.5	4.5	0.75		6.97e-05	0.000268	0.210147	0.808258
442	Cdk19		0.357066	0.0416596	0.160645	SPIKE	28	0	12.25	0	10.5	7	0.75		6.89e-05	0.000268	0.207682	0.808258
521	Ckap2l		0.356966	0.0416596	0.160645	SPIKE	32	8	26	6	19.5	8	0.25		6.92e-05	0.000268	0.20858	0.808258
595	Crygc		0.356966	0.0416596	0.160645	SPIKE	18	1.5	11.62	2	15.5	4.5	0.25		6.92e-05	0.000268	0.20858	0.808258
731	Dram1		0.356793	0.0418596	0.160645	SPIKE	30	22.5	9.38	18	7.5	7.5	0.25		6.97e-05	0.000268	0.210147	0.808258
732	Drc7		0.356793	0.0418596	0.160645	SPIKE	30	22.5	9.38	18	7.5	7.5	0.25		6.97e-05	0.000268	0.210147	0.808258
801	Epn3		0.356902	0.0416596	0.160645	SPIKE	20	1.67	10.42	2	12.5	5	0.75		6.94e-05	0.000268	0.209162	0.808258
995	Gm12022		0.356966	0.0416596	0.160645	SPIKE	35	2.92	20.42	2	14	8.75	0.5		6.92e-05	0.000268	0.20858	0.808258
1017	Gm16183		0.356966	0.0416596	0.160645	SPIKE	32	8	22	6	16.5	8	0.75		6.92e-05	0.000268	0.20858	0.808258
1022	Gm17455		0.356966	0.0416596	0.160645	SPIKE	35	2.92	20.42	2	14	8.75	0.5		6.92e-05	0.000268	0.20858	0.808258
1106	Gm30788		0.356966	0.0416596	0.160645	SPIKE	35	2.92	20.42	2	14	8.75	0.5		6.92e-05	0.000268	0.20858	0.808258
1125	Gm34005		0.355995	0.0422196	0.160645	SPIKE	34	5.67	20.54	4	14.5	8.5	0.75		7.22e-05	0.000275	0.217504	0.827601
1148	Gm39404		0.356966	0.0416596	0.160645	SPIKE	18	10.5	1.5	14	2	4.5	0.5		6.92e-05	0.000268	0.20858	0.808258
1202	Gm6439		0.356143	0.0421996	0.160645	SPIKE	24	8	20	8	20	4	0.5		7.17e-05	0.000274	0.216124	0.825295
1222	Gm8332		0.35656	0.0421996	0.160645	SPIKE	18	0	7.88	0	10.5	4.5	0.75		7.05e-05	0.00027	0.212269	0.813485
1253	Gpnmb		0.356966	0.0416596	0.160645	SPIKE	34	28.33	11.33	20	8	8.5	0.5		6.92e-05	0.000268	0.20858	0.808258
1271	Grasp		0.356793	0.0418596	0.160645	SPIKE	18	0	7.88	0	10.5	4.5	0.75		6.97e-05	0.000268	0.210147	0.808258
1482	Kctd18		0.3572	0.0416496	0.160645	SPIKE	18	0	7.88	0	10.5	4.5	0.75		6.85e-05	0.000268	0.206488	0.808258
1860	Ncf1		0.35656	0.0421996	0.160645	SPIKE	25	0	10.94	0	10.5	6.25	0.75		7.05e-05	0.00027	0.212269	0.813485
1896	Nfkbiz		0.356966	0.0416596	0.160645	SPIKE	32	24	10	18	7.5	8	0.25		6.92e-05	0.000268	0.20858	0.808258
1906	Nlrc5		0.356966	0.0416596	0.160645	SPIKE	34	28.33	9.21	20	6.5	8.5	0.75		6.92e-05	0.000268	0.20858	0.808258
1922	Nphp4		0.355995	0.0422196	0.160645	SPIKE	34	25.5	10.62	18	7.5	8.5	0.25		7.22e-05	0.000275	0.217504	0.827601
1940	Nsun3		0.35656	0.0421996	0.160645	SPIKE	30	0	13.12	0	10.5	7.5	0.75		7.05e-05	0.00027	0.212269	0.813485
1949	Nup188		0.356804	0.0418596	0.160645	SPIKE	24	0	12	0	12	4	0.5		6.97e-05	0.000268	0.210051	0.808258
1980	Osbpl10		0.356293	0.0421996	0.160645	SPIKE	30	0	13.12	0	10.5	7.5	0.75		7.13e-05	0.000273	0.214726	0.821919
2015	Pax2		0.356966	0.0416596	0.160645	SPIKE	32	24	10	18	7.5	8	0.25		6.92e-05	0.000268	0.20858	0.808258
2085	Pik3cg		0.356966	0.0416596	0.160645	SPIKE	18	7.5	15.38	10	20.5	4.5	0.75		6.92e-05	0.000268	0.20858	0.808258
2241	Rad51b		0.357581	0.0407996	0.160645	SPIKE	18	0	9	0	12	3	0.5		6.74e-05	0.000268	0.203113	0.808258
2267	Rbm20		0.356966	0.0416596	0.160645	SPIKE	35	0	19.69	0	13.5	8.75	0.25		6.92e-05	0.000268	0.20858	0.808258
2312	Rin1		0.356966	0.0416596	0.160645	SPIKE	18	0	7.88	0	10.5	4.5	0.75		6.92e-05	0.000268	0.20858	0.808258
2461	Shprh		0.357525	0.0407996	0.160645	SPIKE	24	0	12	0	12	4	0.5		6.76e-05	0.000268	0.203601	0.808258
2651	Stk35		0.357588	0.0407996	0.160645	SPIKE	35	0	19.69	0	13.5	8.75	0.25		6.74e-05	0.000268	0.203048	0.808258
2663	Styxl1		0.356793	0.0418596	0.160645	SPIKE	18	7.5	15.38	10	20.5	4.5	0.75		6.97e-05	0.000268	0.210147	0.808258
2693	Tal1		0.356966	0.0416596	0.160645	SPIKE	35	0	19.69	0	13.5	8.75	0.25		6.92e-05	0.000268	0.20858	0.808258
2696	Tasl		0.356966	0.0416596	0.160645	SPIKE	30	2.5	17.5	2	14	5	0.5		6.92e-05	0.000268	0.20858	0.808258
2737	Tex33		0.355995	0.0422196	0.160645	SPIKE	18	12	1.88	16	2.5	4.5	0.75		7.22e-05	0.000275	0.217504	0.827601
2791	Tmem212		0.356966	0.0416596	0.160645	SPIKE	32	8	22	6	16.5	8	0.75		6.92e-05	0.000268	0.20858	0.808258
2879	Trpc6		0.356966	0.0416596	0.160645	SPIKE	35	0	19.69	0	13.5	8.75	0.25		6.92e-05	0.000268	0.20858	0.808258
2912	Ttf2		0.356793	0.0418596	0.160645	SPIKE	25	0	10.94	0	10.5	6.25	0.75		6.97e-05	0.000268	0.210147	0.808258
2918	Ttn		0.358254	0.0397496	0.160645	SPIKE	28	0	14	0	12	7	0.5		6.55e-05	0.000266	0.197277	0.801125
2971	Vasp		0.356812	0.0418596	0.160645	SPIKE	27	0	11.81	0	10.5	6.75	0.75		6.97e-05	0.000268	0.209976	0.808258
3079	Zfp143		0.357137	0.0416596	0.160645	SPIKE	25	0	10.94	0	10.5	6.25	0.75		6.87e-05	0.000268	0.207047	0.808258
3080	Zfp180		0.3577	0.0402596	0.160645	SPIKE	25	0	10.94	0	10.5	6.25	0.75		6.71e-05	0.000268	0.202065	0.808258
3180	Zfpm1		0.356793	0.0418596	0.160645	SPIKE	24	16	2.5	16	2.5	6	0.75		6.97e-05	0.000268	0.210147	0.808258
1662	Map4k5		0.35588	0.0424396	0.160794	SPIKE	23	1.92	13.42	2	14	7.67	0.5		7.25e-05	0.000275	0.218587	0.828767
2252	Rapgef5		0.355889	0.0424396	0.160794	SPIKE	32	26.67	8.67	20	6.5	8	0.75		7.25e-05	0.000275	0.218507	0.828767
2528	Slc38a9		0.355816	0.0424596	0.160794	SPIKE	27	0	11.81	0	10.5	6.75	0.75		7.27e-05	0.000275	0.219193	0.83008
2563	Slitrk3		0.355959	0.0424396	0.160794	SPIKE	26	0	13	0	12	8.67	0.5		7.23e-05	0.000275	0.21784	0.827897
2521	Slc35e1		0.355666	0.0430396	0.162605	SPIKE	25	0	10.94	0	10.5	6.25	0.75		7.32e-05	0.000277	0.220611	0.833478
3141	Zfp672		0.355711	0.0430396	0.162605	SPIKE	35	0	19.69	0	13.5	8.75	0.25		7.31e-05	0.000276	0.220179	0.832829
2684	Taf1a		0.355409	0.0433796	0.163504	NSPIKE	20	3.75	15	4.5	18	15	0.25		7.4e-05	0.000279	0.223061	0.840749
2812	Tnni1		0.355409	0.0433796	0.163504	SPIKE	24	12	0	12	0	8	0.5		7.4e-05	0.000279	0.223061	0.840749
1512	Klhl28		0.355249	0.0436196	0.164022	NSPIKE	22	19.71	7.33	21.5	8	16.5	0.75		7.45e-05	0.00028	0.22461	0.844595
1609	Lrba		0.355293	0.0436196	0.164022	NSPIKE	19	11.48	3.17	14.5	4	14.25	0.25		7.44e-05	0.00028	0.224184	0.843986
264	Bahcc1		0.354934	0.0441096	0.165088	SPIKE	23	1.92	13.42	2	14	5.75	0.5		7.56e-05	0.000283	0.227664	0.852076
1307	Hapln2		0.355064	0.0441096	0.165088	SPIKE	22	0	12.38	0	13.5	5.5	0.25		7.51e-05	0.000282	0.226398	0.850321
2440	Sgms1		0.354967	0.0441096	0.165088	SPIKE	24	2	12.5	2	12.5	6	0.75		7.55e-05	0.000283	0.227342	0.852076
3105	Zfp40		0.354942	0.0441096	0.165088	SPIKE	28	0	14	0	12	7	0.5		7.55e-05	0.000283	0.227588	0.852076
3008	Wdr70		0.354729	0.0449496	0.168036	ACOS	35	14.58	17.5	10	12	35	0.92		7.62e-05	0.000285	0.229684	0.858633
648	Dcaf15		0.354386	0.0452695	0.169034	SPIKE	23	1.92	13.42	2	14	7.67	0.5		7.74e-05	0.000289	0.23309	0.870349
295	Bpifb1		0.353958	0.0454695	0.169583	SPIKE	24	0	12	0	12	4	0.5		7.88e-05	0.000294	0.237404	0.885425
592	Crybb1		0.353509	0.0463195	0.171448	SPIKE	26	23.83	12.46	22	11.5	6.5	0.25		8.03e-05	0.000299	0.242018	0.900534
722	Dok7		0.353679	0.0462795	0.171448	SPIKE	27	0	11.81	0	10.5	6.75	0.75		7.97e-05	0.000297	0.240262	0.895039
1214	Gm7814		0.353106	0.0466595	0.171448	SPIKE	18	10.5	1.5	14	2	6	0.5		8.17e-05	0.000302	0.246232	0.908902
1647	Lzic		0.352966	0.0466995	0.171448	SPIKE	30	22.5	7.5	18	6	5	0.5		8.22e-05	0.000303	0.24771	0.912165
1650	Mafk		0.352847	0.0466995	0.171448	NSPIKE	24	18	6	18	6	16	0.5		8.26e-05	0.000304	0.248972	0.914708
1848	Naa16		0.353076	0.0466595	0.171448	SPIKE	32	16	0	12	0	8	0.5		8.18e-05	0.000302	0.24654	0.908902
2473	Six3		0.352767	0.0467195	0.171448	SPIKE	30	22.5	7.5	18	6	5	0.5		8.29e-05	0.000304	0.249823	0.916783
2587	Snx19		0.352887	0.0466995	0.171448	SPIKE	18	0	9	0	12	3	0.5		8.25e-05	0.000303	0.248542	0.914176
2644	Sting1		0.353282	0.0463195	0.171448	SPIKE	19	17.42	9.1	22	11.5	4.75	0.25		8.11e-05	0.000301	0.244378	0.906334
2656	Stpg3		0.353262	0.0463195	0.171448	SPIKE	32	5.33	19.33	4	14.5	8	0.75		8.12e-05	0.000301	0.244594	0.906334
2664	Sult1a1		0.353161	0.0466595	0.171448	NSPIKE	18	5.62	13.5	7.5	18	13.5	0.75		8.15e-05	0.000302	0.245644	0.908742
3042	Zbed4		0.353076	0.0466595	0.171448	SPIKE	32	24	8	18	6	8	0.5		8.18e-05	0.000302	0.24654	0.908902
3146	Zfp707		0.35341	0.0463195	0.171448	SPIKE	18	12	1.88	16	2.5	4.5	0.75		8.07e-05	0.0003	0.243047	0.903311
3200	Zzz3		0.35325	0.0466595	0.171448	NSPIKE	28	19.25	7	16.5	6	21	0.25		8.12e-05	0.000301	0.24471	0.906334
2077	Pias3		0.352654	0.0469895	0.172241	SPIKE	24	12	0	12	0	8	0.5		8.33e-05	0.000305	0.251029	0.919766
6	1700019D03Rik		0.352381	0.0481095	0.174854	SPIKE	24	0	13.5	0	13.5	6	0.25		8.43e-05	0.000307	0.253976	0.924896
349	Car7		0.352082	0.0481395	0.174854	SPIKE	24	22	10	22	10	8	0.5		8.54e-05	0.00031	0.257235	0.934339
421	Cd86		0.352373	0.0481095	0.174854	SPIKE	32	24	8	18	6	8	0.5		8.43e-05	0.000307	0.254057	0.924896
976	Glb1l		0.352106	0.0481395	0.174854	SPIKE	24	2	12.5	2	12.5	6	0.75		8.53e-05	0.00031	0.256973	0.934339
1010	Gm15521		0.352373	0.0481095	0.174854	SPIKE	18	0	9	0	12	3	0.5		8.43e-05	0.000307	0.254057	0.924896
2362	Rspo1		0.352373	0.0481095	0.174854	SPIKE	32	24	8	18	6	8	0.5		8.43e-05	0.000307	0.254057	0.924896
2774	Tmem100		0.352637	0.0477595	0.174854	SPIKE	18	0	9	0	12	3	0.5		8.34e-05	0.000305	0.251211	0.919766
3024	Xaf1		0.352373	0.0481095	0.174854	SPIKE	18	0	9	0	12	3	0.5		8.43e-05	0.000307	0.254057	0.924896
122	Adra1a		0.35164	0.0494095	0.17776	SPIKE	24	0	12	0	12	4	0.5		8.7e-05	0.000316	0.262127	0.951029
240	Atg2b		0.35125	0.0494395	0.17776	NSPIKE	24	20	8	20	8	20	0.5		8.85e-05	0.000319	0.26652	0.961517
392	Ccdc69		0.351051	0.0494395	0.17776	SPIKE	35	2.92	20.42	2	14	8.75	0.5		8.92e-05	0.000321	0.268789	0.966875
666	Ddit4l		0.35125	0.0494395	0.17776	NSPIKE	20	3.33	13.33	4	16	15	0.5		8.85e-05	0.000319	0.26652	0.961517
691	Diras1		0.35125	0.0494395	0.17776	NSPIKE	24	20.5	10	20.5	10	18	0.25		8.85e-05	0.000319	0.26652	0.961517
1348	Hpgds		0.35104	0.0494395	0.17776	SPIKE	19	6.33	15.83	8	20	3.17	0.5		8.93e-05	0.000321	0.268912	0.966875
1548	Ldb3		0.351051	0.0494395	0.17776	SPIKE	18	7.5	15.38	10	20.5	4.5	0.75		8.92e-05	0.000321	0.268789	0.966875
1611	Lrch3		0.35148	0.0494395	0.17776	SPIKE	35	0	19.69	0	13.5	8.75	0.25		8.76e-05	0.000317	0.263927	0.956472
1865	Ncoa6		0.351418	0.0494395	0.17776	SPIKE	26	0	14.62	0	13.5	6.5	0.25		8.78e-05	0.000318	0.264619	0.957895
2787	Tmem192		0.350934	0.0497595	0.17871	NSPIKE	29	16.92	2.42	14	2	24.17	0.5		8.97e-05	0.000322	0.270124	0.969322
246	Atp6v1c2		0.350797	0.0501695	0.178778	SPIKE	27	9	24.19	8	21.5	6.75	0.25		9.02e-05	0.000322	0.271713	0.969322
317	C5ar1		0.350797	0.0501695	0.178778	SPIKE	19	6.33	14.65	8	18.5	4.75	0.75		9.02e-05	0.000322	0.271713	0.969322
918	Focad		0.350884	0.0501395	0.178778	NSPIKE	28	19.25	7	16.5	6	21	0.25		8.98e-05	0.000322	0.270702	0.969322
2390	Sbk3		0.350797	0.0501695	0.178778	SPIKE	22	14.67	2.29	16	2.5	5.5	0.75		9.02e-05	0.000322	0.271713	0.969322
2687	Taf4b		0.350797	0.0501695	0.178778	SPIKE	22	5.5	16.5	6	18	3.67	0.5		9.02e-05	0.000322	0.271713	0.969322
2717	Tctex1d4		0.350756	0.0501695	0.178778	SPIKE	20	5	13.75	6	16.5	5	0.75		9.03e-05	0.000322	0.272182	0.969913
2735	Tex21		0.350797	0.0501695	0.178778	SPIKE	21	3.5	14	4	16	5.25	0.5		9.02e-05	0.000322	0.271713	0.969322
256	Aven		0.350616	0.0505795	0.179057	ACOS	35	11.67	20.42	8	14	35	0.75		9.09e-05	0.000323	0.273809	0.973545
580	Cracdl		0.350473	0.0506395	0.179057	SPIKE	18	0	9	0	12	3	0.5		9.14e-05	0.000324	0.275475	0.975995
768	Efna3		0.350426	0.0506395	0.179057	SPIKE	18	0	7.88	0	10.5	4.5	0.75		9.16e-05	0.000324	0.276024	0.975995
777	Elk3		0.350473	0.0506395	0.179057	SPIKE	24	12	0	12	0	8	0.5		9.14e-05	0.000324	0.275475	0.975995
1743	Morrbid		0.350584	0.0506395	0.179057	SPIKE	18	10.5	1.5	14	2	4.5	0.5		9.1e-05	0.000323	0.274177	0.973771
2813	Tnnt1		0.350616	0.0505795	0.179057	SPIKE	24	0	13.5	0	13.5	6	0.25		9.09e-05	0.000323	0.273809	0.973545
2848	Trim33		0.350434	0.0506395	0.179057	NSPIKE	29	16.92	2.42	14	2	24.17	0.5		9.16e-05	0.000324	0.27593	0.975995
847	Fam214a		0.35015	0.0515595	0.181109	NSPIKE	35	10.94	26.25	7.5	18	26.25	0.75		9.27e-05	0.000327	0.279275	0.984231
1123	Gm33856		0.35007	0.0515595	0.181109	SPIKE	20	5	16.25	6	19.5	5	0.25		9.3e-05	0.000327	0.280231	0.984346
1495	Kif26a		0.35007	0.0515595	0.181109	SPIKE	20	5	16.25	6	19.5	5	0.25		9.3e-05	0.000327	0.280231	0.984346
1585	LOC118567326		0.35007	0.0515595	0.181109	SPIKE	20	5	16.25	6	19.5	5	0.25		9.3e-05	0.000327	0.280231	0.984346
1595	LOC118568120		0.350294	0.0515595	0.181109	SPIKE	22	5.5	15.12	6	16.5	5.5	0.75		9.21e-05	0.000325	0.277574	0.980393
2517	Slc31a2		0.350183	0.0515595	0.181109	SPIKE	28	23.33	11.08	20	9.5	7	0.25		9.26e-05	0.000327	0.278886	0.983943
448	Cdkn1a		0.349948	0.0523095	0.182975	SPIKE	18	0	9	0	12	3	0.5		9.35e-05	0.000328	0.281683	0.987279
532	Cln3		0.349948	0.0523095	0.182975	SPIKE	18	0	9	0	12	3	0.5		9.35e-05	0.000328	0.281683	0.987279
2292	Rffl		0.349596	0.0523195	0.182975	SPIKE	24	2	12.5	2	12.5	6	0.75		9.49e-05	0.000332	0.285929	0.999969
2646	Stk19		0.349609	0.0523195	0.182975	SPIKE	18	0	9	0	12	3	0.5		9.48e-05	0.000332	0.285769	0.999969
1239	Gmeb1		0.349421	0.0525495	0.183179	SPIKE	18	7.5	15.38	10	20.5	4.5	0.75		9.56e-05	0.000334	0.288051	1
1381	Ikzf2		0.349267	0.0525495	0.183179	SPIKE	24	2	14	2	14	6	0.5		9.62e-05	0.000336	0.289934	1
2102	Platr25		0.349149	0.0525495	0.183179	SPIKE	20	5	15	6	18	6.67	0.5		9.67e-05	0.000337	0.291394	1
2251	Rap2b		0.348943	0.0527295	0.183407	NSPIKE	28	19.25	7	16.5	6	21	0.25		9.76e-05	0.000339	0.293945	1
2632	St8sia5		0.349015	0.0526995	0.183407	SPIKE	27	0	11.81	0	10.5	6.75	0.75		9.73e-05	0.000339	0.293045	1
514	Chrnb4		0.348927	0.0528195	0.18352	SPIKE	18	10.5	1.5	14	2	6	0.5		9.76e-05	0.000339	0.294144	1
74	Acd		0.348461	0.0542395	0.186167	SPIKE	22	0	12.38	0	13.5	5.5	0.25		9.96e-05	0.000344	0.299995	1
238	Atf6		0.348568	0.0536895	0.186167	SPIKE	19	11.08	0.4	14	0.5	4.75	0.75		9.91e-05	0.000344	0.29864	1
385	Ccdc157		0.348337	0.0542395	0.186167	SPIKE	25	0	10.94	0	10.5	6.25	0.75		0.0001	0.000344	0.301578	1
430	Cdca7		0.348337	0.0542395	0.186167	SPIKE	18	6	15	8	20	6	0.5		0.0001	0.000344	0.301578	1
761	Edrf1		0.348364	0.0542395	0.186167	SPIKE	26	23.83	10.83	22	10	6.5	0.5		0.0001	0.000344	0.301234	1
899	Fhod3		0.348514	0.0542395	0.186167	SPIKE	26	21.67	10.29	20	9.5	6.5	0.25		9.93e-05	0.000344	0.299323	1
1971	Ogn		0.348364	0.0542395	0.186167	SPIKE	35	0	19.69	0	13.5	8.75	0.25		0.0001	0.000344	0.301234	1
2135	Poc1b		0.348364	0.0542395	0.186167	SPIKE	18	6	16.12	8	21.5	4.5	0.25		0.0001	0.000344	0.301234	1
2184	Prmt9		0.348425	0.0542395	0.186167	ACOS	23	1.92	19.17	2	20	23	0.25		9.97e-05	0.000344	0.30045	1
2237	Rab3ip		0.348364	0.0542395	0.186167	SPIKE	18	12	1.88	16	2.5	4.5	0.75		0.0001	0.000344	0.301234	1
2309	Rhpn1		0.348213	0.0542395	0.186167	SPIKE	25	0	10.94	0	10.5	6.25	0.75		0.000101	0.000345	0.303158	1
3195	Zscan25		0.348195	0.0542795	0.186167	SPIKE	25	0	10.94	0	10.5	6.25	0.75		0.000101	0.000345	0.303389	1
2421	Serpina3f		0.348098	0.0553194	0.189531	SPIKE	27	0	11.81	0	10.5	6.75	0.75		0.000101	0.000346	0.304636	1
808	Erich3		0.348045	0.0554794	0.189673	SPIKE	31	25.83	8.4	20	6.5	7.75	0.75		0.000101	0.000346	0.305309	1
1902	Nin		0.348045	0.0554794	0.189673	SPIKE	18	0	9	0	12	3	0.5		0.000101	0.000346	0.305309	1
1354	Htr4		0.347864	0.0562894	0.191624	SPIKE	24	0	12	0	12	4	0.5		0.000102	0.000348	0.307659	1
2431	Sfmbt2		0.348018	0.0562894	0.191624	SPIKE	24	2	12.5	2	12.5	6	0.75		0.000101	0.000346	0.305657	1
2619	Sqle		0.347827	0.0562894	0.191624	NSPIKE	27	4.5	18	4	16	22.5	0.5		0.000102	0.000349	0.308143	1
2648	Stk3		0.347612	0.0562894	0.191624	SPIKE	26	23.83	10.83	22	10	6.5	0.5		0.000103	0.000351	0.310951	1
192	Appl2		0.34744	0.0563594	0.191658	NSPIKE	28	19.25	7	16.5	6	21	0.25		0.000104	0.000354	0.313205	1
362	Cat		0.347006	0.0566494	0.192032	SPIKE	18	7.5	15.38	10	20.5	4.5	0.75		0.000106	0.000359	0.318988	1
1549	Ldlr		0.347025	0.0566494	0.192032	SPIKE	24	0	12	0	12	4	0.5		0.000106	0.000359	0.31874	1
1912	Nmrk1		0.347025	0.0566494	0.192032	SPIKE	28	14	0	12	0	7	0.5		0.000106	0.000359	0.31874	1
591	Cryba4		0.346451	0.0574094	0.193992	SPIKE	19	6.33	15.83	8	20	3.17	0.5		0.000108	0.000367	0.326526	1
1328	Hic1		0.346451	0.0574094	0.193992	SPIKE	18	4.5	13.5	6	18	3	0.5		0.000108	0.000367	0.326526	1
2143	Polr3a		0.346421	0.0574094	0.193992	SPIKE	24	12	0	12	0	8	0.5		0.000109	0.000367	0.326937	1
2611	Spef1l		0.346107	0.0584194	0.197191	SPIKE	18	7.5	15.38	10	20.5	4.5	0.75		0.00011	0.000371	0.33129	1
2928	Tvp23a		0.346051	0.0584794	0.197191	NSPIKE	34	12.04	31.17	8.5	22	25.5	0.25		0.00011	0.000372	0.332071	1
315	C4a		0.344265	0.0607494	0.199858	SPIKE	34	28.33	9.21	20	6.5	8.5	0.75		0.000119	0.000391	0.357874	1
567	Coq8a		0.344267	0.0607494	0.199858	SPIKE	24	0	13.5	0	13.5	6	0.25		0.000119	0.000391	0.357849	1
619	Cyld		0.345245	0.0600794	0.199858	SPIKE	24	0	12	0	12	4	0.5		0.000114	0.000381	0.34349	1
621	Cyp2d11		0.344396	0.0607494	0.199858	NSPIKE	22	18.79	9.17	20.5	10	16.5	0.25		0.000118	0.000391	0.355927	1
671	Ddx19b		0.34538	0.0600594	0.199858	NSPIKE	24	18	6	18	6	16	0.5		0.000113	0.000379	0.341554	1
811	Espn		0.344265	0.0607494	0.199858	SPIKE	26	23.83	10.83	22	10	6.5	0.5		0.000119	0.000391	0.357874	1
821	Exoc1		0.344207	0.0607694	0.199858	SPIKE	22	0	12.38	0	13.5	5.5	0.25		0.000119	0.000392	0.358744	1
863	Fbf1		0.345155	0.0600794	0.199858	SPIKE	23	1.92	14.85	2	15.5	5.75	0.25		0.000114	0.000382	0.344783	1
1570	Lmbr1		0.345462	0.0599994	0.199858	SPIKE	24	10	23.5	10	23.5	6	0.25		0.000113	0.000379	0.340381	1
1864	Ncoa3		0.345681	0.0599194	0.199858	SPIKE	22	0	12.38	0	13.5	5.5	0.25		0.000112	0.000376	0.337268	1
2036	Pde7a		0.3448	0.0606394	0.199858	SPIKE	30	0	13.12	0	10.5	7.5	0.75		0.000116	0.000386	0.349952	1
2173	Prdm8		0.344265	0.0607494	0.199858	SPIKE	25	0	10.94	0	10.5	6.25	0.75		0.000119	0.000391	0.357874	1
2242	Rad51d		0.344865	0.0603394	0.199858	SPIKE	32	24	8	18	6	8	0.5		0.000116	0.000385	0.348999	1
2266	Rbm12b2		0.3448	0.0606394	0.199858	SPIKE	18	0	7.88	0	10.5	4.5	0.75		0.000116	0.000386	0.349952	1
2285	Reep6		0.344239	0.0607694	0.199858	SPIKE	26	0	13	0	12	8.67	0.5		0.000119	0.000391	0.358261	1
2372	Rusf1		0.345293	0.0600794	0.199858	SPIKE	18	6	16.12	8	21.5	4.5	0.25		0.000114	0.00038	0.342796	1
2485	Slc15a4		0.345802	0.0599194	0.199858	SPIKE	22	0	12.38	0	13.5	5.5	0.25		0.000111	0.000375	0.335555	1
2498	Slc25a37		0.344976	0.0603394	0.199858	SPIKE	27	0	11.81	0	10.5	6.75	0.75		0.000115	0.000384	0.347386	1
2507	Slc26a4		0.344865	0.0603394	0.199858	SPIKE	18	0	9	0	12	3	0.5		0.000116	0.000385	0.348999	1
2531	Slc39a2		0.344265	0.0607494	0.199858	SPIKE	19	15.83	7.52	20	9.5	4.75	0.25		0.000119	0.000391	0.357874	1
2589	Snx25		0.345753	0.0599194	0.199858	SPIKE	19	17.42	7.92	22	10	4.75	0.5		0.000112	0.000376	0.33624	1
2683	Tada2a		0.344682	0.0607194	0.199858	NSPIKE	24	18	6	18	6	16	0.5		0.000117	0.000387	0.351683	1
2816	Tnrc6c		0.345477	0.0599994	0.199858	NSPIKE	35	16.77	32.08	11.5	22	26.25	0.75		0.000113	0.000379	0.340158	1
3193	Zscan2		0.345537	0.0599994	0.199858	SPIKE	31	25.83	8.4	20	6.5	7.75	0.75		0.000113	0.000378	0.33931	1
930	Frmd8		0.343966	0.0615994	0.202172	NSPIKE	20	3.75	15	4.5	18	15	0.25		0.00012	0.000395	0.362374	1
2872	Trp53i13		0.34396	0.0615994	0.202172	SPIKE	30	15	28.12	12	22.5	7.5	0.75		0.00012	0.000395	0.362475	1
483	Cfap161		0.343837	0.0616794	0.202227	NSPIKE	20	0	10	0	12	15	0.5		0.000121	0.000396	0.364335	1
1713	Mfsd8		0.343714	0.0620694	0.203298	NSPIKE	28	19.25	7	16.5	6	21	0.25		0.000122	0.000398	0.366213	1
2506	Slc26a11		0.343622	0.0623894	0.204137	SPIKE	24	2	12.5	2	12.5	6	0.75		0.000122	0.000399	0.367628	1
84	Acp5		0.343415	0.0633294	0.20613	SPIKE	18	6	15	8	20	6	0.5		0.000123	0.000402	0.370815	1
985	Gm10037		0.343393	0.0633294	0.20613	SPIKE	23	1.92	13.42	2	14	5.75	0.5		0.000123	0.000402	0.371155	1
1262	Gpr39		0.342857	0.0634494	0.20613	SPIKE	24	6	16.5	6	16.5	6	0.75		0.000126	0.000409	0.379538	1
1691	Mecom		0.342857	0.0634494	0.20613	NSPIKE	24	18.5	8	18.5	8	18	0.25		0.000126	0.000409	0.379538	1
2316	Ripply2		0.342861	0.0634494	0.20613	SPIKE	21	1.75	12.25	2	14	5.25	0.5		0.000126	0.000409	0.379476	1
2981	Vps37a		0.343111	0.0633294	0.20613	SPIKE	22	3.67	14.67	4	16	5.5	0.5		0.000125	0.000406	0.37555	1
3039	Ythdf3		0.343543	0.0633294	0.20613	NSPIKE	34	12.04	31.17	8.5	22	25.5	0.25		0.000122	0.0004	0.368837	1
2806	Tmtc3		0.342291	0.0647094	0.21001	SPIKE	32	26.67	8.67	20	6.5	8	0.75		0.000129	0.000418	0.388596	1
24	3830406C13Rik		0.342006	0.0657093	0.210852	NSPIKE	23	22.52	9.58	23.5	10	17.25	0.75		0.000131	0.000421	0.393217	1
488	Cfap54		0.341802	0.0657593	0.210852	SPIKE	32	24	8	18	6	8	0.5		0.000132	0.000422	0.396568	1
543	Cnn1		0.341829	0.0657593	0.210852	SPIKE	23	1.92	13.42	2	14	7.67	0.5		0.000131	0.000422	0.396134	1
1196	Gm5662		0.341802	0.0657593	0.210852	SPIKE	18	0	9	0	12	3	0.5		0.000132	0.000422	0.396568	1
1225	Gm8957		0.341956	0.0657093	0.210852	SPIKE	33	11	25.44	8	18.5	8.25	0.75		0.000131	0.000422	0.394041	1
1275	Grid1		0.342261	0.0654093	0.210852	SPIKE	24	2	12.5	2	12.5	6	0.75		0.000129	0.000418	0.38907	1
1755	Mrgpra6		0.341802	0.0657593	0.210852	SPIKE	27	6.75	21.94	6	19.5	6.75	0.25		0.000132	0.000422	0.396568	1
1957	Nxpe4		0.342268	0.0654093	0.210852	SPIKE	29	24.17	11.48	20	9.5	7.25	0.25		0.000129	0.000418	0.388968	1
2529	Slc39a1		0.342253	0.0654093	0.210852	NSPIKE	18	5.62	13.5	7.5	18	13.5	0.75		0.000129	0.000418	0.389207	1
2720	Tdp1		0.342007	0.0657093	0.210852	SPIKE	24	2	12.5	2	12.5	6	0.75		0.000131	0.000421	0.393213	1
2748	Tgif1		0.341875	0.0657593	0.210852	SPIKE	20	5	15	6	18	6.67	0.5		0.000131	0.000422	0.395376	1
3027	Xkrx		0.341829	0.0657593	0.210852	SPIKE	26	0	13	0	12	8.67	0.5		0.000131	0.000422	0.396134	1
234	Asphd2		0.340975	0.0675593	0.215114	SPIKE	32	24	8	18	6	8	0.5		0.000136	0.000434	0.410418	1
874	Fbxo25		0.341231	0.0674893	0.215114	NSPIKE	35	14.58	32.08	10	22	29.17	0.5		0.000135	0.000431	0.406093	1
1001	Gm13472		0.341092	0.0674993	0.215114	SPIKE	30	10	23.12	8	18.5	7.5	0.75		0.000136	0.000433	0.40844	1
1514	Klhl32		0.340975	0.0675593	0.215114	SPIKE	18	0	9	0	12	3	0.5		0.000136	0.000434	0.410418	1
1932	Nr2c1		0.340873	0.0675593	0.215114	SPIKE	19	6.33	15.83	8	20	3.17	0.5		0.000137	0.000436	0.412156	1
2066	Pgls		0.341231	0.0674893	0.215114	NSPIKE	19	11.08	1.58	14	2	15.83	0.5		0.000135	0.000431	0.406093	1
2591	Snx8		0.341231	0.0674893	0.215114	NSPIKE	19	11.08	1.58	14	2	15.83	0.5		0.000135	0.000431	0.406093	1
206	Arhgef1		0.340167	0.0689093	0.215927	SPIKE	30	0	13.12	0	10.5	7.5	0.75		0.000141	0.000445	0.424394	1
378	Ccdc137		0.340604	0.0681893	0.215927	SPIKE	19	15.83	7.52	20	9.5	4.75	0.25		0.000138	0.000439	0.416782	1
453	Cebpa		0.340167	0.0689093	0.215927	SPIKE	25	4.17	16.67	4	16	4.17	0.5		0.000141	0.000445	0.424394	1
568	Coq8b		0.340151	0.0689093	0.215927	NSPIKE	27	4.5	18	4	16	22.5	0.5		0.000141	0.000445	0.424666	1
1177	Gm4822		0.339717	0.0690293	0.215927	SPIKE	25	4.17	16.67	4	16	4.17	0.5		0.000143	0.00045	0.432364	1
1417	Iqgap2		0.340735	0.0679493	0.215927	SPIKE	27	0	11.81	0	10.5	6.75	0.75		0.000138	0.000438	0.414528	1
1451	Kazald1		0.339956	0.0690093	0.215927	NSPIKE	24	20	8	20	8	20	0.5		0.000142	0.000446	0.428117	1
1854	Napepld		0.339956	0.0690093	0.215927	NSPIKE	27	4.5	18	4	16	22.5	0.5		0.000142	0.000446	0.428117	1
2024	Pcgf3		0.339663	0.0690293	0.215927	NSPIKE	22	19.71	7.33	21.5	8	16.5	0.75		0.000144	0.00045	0.433325	1
2103	Plcb3		0.340529	0.0681893	0.215927	SPIKE	31	25.83	8.4	20	6.5	7.75	0.75		0.000139	0.00044	0.418079	1
2134	Pnpla7		0.339956	0.0690093	0.215927	NSPIKE	24	20	8	20	8	20	0.5		0.000142	0.000446	0.428117	1
2210	Pth2r		0.340168	0.0689093	0.215927	SPIKE	18	6	15	8	20	3	0.5		0.000141	0.000445	0.424372	1
2270	Rbm43		0.339942	0.0690293	0.215927	SPIKE	19	11.08	0.4	14	0.5	4.75	0.75		0.000142	0.000446	0.428363	1
2351	Rps6ka6		0.340529	0.0681893	0.215927	SPIKE	24	12	0	12	0	8	0.5		0.000139	0.00044	0.418079	1
2567	Smad5		0.339625	0.0690293	0.215927	NSPIKE	27	17.44	2.25	15.5	2	20.25	0.75		0.000144	0.000451	0.434007	1
2581	Snap23		0.340096	0.0689593	0.215927	SPIKE	21	1.75	12.25	2	14	5.25	0.5		0.000141	0.000445	0.425638	1
2835	Trappc10		0.340697	0.0681493	0.215927	SPIKE	23	1.92	13.42	2	14	7.67	0.5		0.000138	0.000438	0.415185	1
2977	Vldlr		0.339956	0.0690093	0.215927	NSPIKE	24	20.5	10	20.5	10	18	0.25		0.000142	0.000446	0.428117	1
810	Errfi1		0.33934	0.0697393	0.217087	NSPIKE	29	19.33	4.83	16	4	24.17	0.5		0.000146	0.000454	0.43915	1
1211	Gm7621		0.339526	0.0697293	0.217087	SPIKE	18	7.5	15.38	10	20.5	4.5	0.75		0.000145	0.000452	0.43579	1
1622	Lrrc2		0.339379	0.0697393	0.217087	SPIKE	28	0	14	0	12	7	0.5		0.000146	0.000454	0.438434	1
2810	Tnfsfm13		0.339451	0.0697393	0.217087	NSPIKE	24	18.5	8	18.5	8	18	0.25		0.000145	0.000453	0.437131	1
2997	Wasf2		0.339254	0.0697393	0.217087	SPIKE	22	0	12.38	0	13.5	5.5	0.25		0.000146	0.000455	0.4407	1
2617	Spry4		0.339149	0.0700493	0.217629	SPIKE	28	14	0	12	0	7	0.5		0.000147	0.000456	0.442628	1
3075	Zfp13		0.339179	0.0700493	0.217629	SPIKE	19	17.42	9.1	22	11.5	4.75	0.25		0.000147	0.000456	0.442076	1
948	Gas2		0.339007	0.0706593	0.219099	SPIKE	23	1.92	11.98	2	12.5	5.75	0.75		0.000148	0.000458	0.445223	1
2602	Spag1		0.339072	0.0706593	0.219099	SPIKE	18	0	7.88	0	10.5	4.5	0.75		0.000147	0.000457	0.444034	1
452	Cdyl2		0.33851	0.0723093	0.221911	SPIKE	18	0	9	0	12	3	0.5		0.000151	0.000463	0.45444	1
1930	Npy2r		0.338549	0.0722293	0.221911	SPIKE	26	23.83	12.46	22	11.5	6.5	0.25		0.000151	0.000463	0.453702	1
2011	Parn		0.338479	0.0723293	0.221911	SPIKE	26	21.67	10.29	20	9.5	6.5	0.25		0.000151	0.000463	0.455024	1
2048	Pdzk1ip1		0.338716	0.0721793	0.221911	SPIKE	22	3.67	14.67	4	16	5.5	0.5		0.00015	0.000463	0.450595	1
2189	Prr14		0.338479	0.0723293	0.221911	SPIKE	18	6	16.12	8	21.5	4.5	0.25		0.000151	0.000463	0.455024	1
2293	Rft1		0.33851	0.0723093	0.221911	SPIKE	19	6.33	15.83	8	20	3.17	0.5		0.000151	0.000463	0.45444	1
2305	Rhobtb1		0.33851	0.0723093	0.221911	SPIKE	19	6.33	15.83	8	20	3.17	0.5		0.000151	0.000463	0.45444	1
2318	Rlf		0.33851	0.0723093	0.221911	SPIKE	21	1.75	12.25	2	14	3.5	0.5		0.000151	0.000463	0.45444	1
2609	Specc1l		0.338926	0.0717093	0.221911	SPIKE	28	0	14	0	12	7	0.5		0.000148	0.000459	0.446722	1
2917	Ttll9		0.338502	0.0723293	0.221911	NSPIKE	28	19.25	7	16.5	6	21	0.25		0.000151	0.000463	0.454597	1
2962	Utf1		0.338624	0.0722293	0.221911	ACOS	18	9	16.5	12	22	18	0.58		0.00015	0.000463	0.452304	1
289	Birc2		0.337968	0.0733893	0.222908	SPIKE	24	0	12	0	12	4	0.5		0.000154	0.000471	0.464692	1
466	Cep104		0.338095	0.0733493	0.222908	SPIKE	24	2	12.5	2	12.5	6	0.75		0.000153	0.00047	0.462267	1
599	Csnk1g1		0.337835	0.0733893	0.222908	SPIKE	35	2.92	20.42	2	14	8.75	0.5		0.000155	0.000473	0.467246	1
943	Gabra4		0.33784	0.0733893	0.222908	NSPIKE	26	21.67	8.67	20	8	19.5	0.5		0.000155	0.000473	0.467148	1
1181	Gm4887		0.337723	0.0736093	0.222908	NSPIKE	20	0	10	0	12	15	0.5		0.000156	0.000474	0.469391	1
1439	Jade3		0.337735	0.0736093	0.222908	SPIKE	21	1.75	12.25	2	14	7	0.5		0.000156	0.000474	0.46917	1
1632	Lrrk1		0.337735	0.0736093	0.222908	SPIKE	25	0	12.5	0	12	8.33	0.5		0.000156	0.000474	0.46917	1
1888	Neurl3		0.337183	0.0736293	0.222908	SPIKE	24	14	0.5	14	0.5	6	0.75		0.000159	0.000483	0.479922	1
2115	Plekhh3		0.337171	0.0736293	0.222908	NSPIKE	24	22	10	22	10	16	0.5		0.000159	0.000483	0.480168	1
2116	Plekhm3		0.337984	0.0733893	0.222908	NSPIKE	28	19.25	7	16.5	6	21	0.25		0.000154	0.000471	0.464384	1
2172	Prdm4		0.337131	0.0736293	0.222908	NSPIKE	24	18	6	18	6	16	0.5		0.00016	0.000483	0.480963	1
2271	Rbm44		0.338335	0.0732793	0.222908	SPIKE	18	6	15	8	20	4.5	0.5		0.000152	0.000466	0.457724	1
3056	Zc3h3		0.337183	0.0736293	0.222908	SPIKE	24	10	23.5	10	23.5	6	0.25		0.000159	0.000483	0.479922	1
3089	Zfp280d		0.337551	0.0736093	0.222908	SPIKE	21	5.25	14.44	6	16.5	5.25	0.75		0.000157	0.000477	0.472723	1
1537	Larp4b		0.336842	0.0742893	0.224693	NSPIKE	24	20	8	20	8	20	0.5		0.000162	0.000489	0.486683	1
1206	Gm7244		0.336749	0.0748793	0.226264	SPIKE	24	0	13.5	0	13.5	6	0.25		0.000162	0.00049	0.488549	1
417	Cd48		0.336718	0.0762192	0.229567	SPIKE	18	0	9	0	12	3	0.5		0.000162	0.00049	0.489183	1
1172	Gm46415		0.336627	0.0762192	0.229567	NSPIKE	25	16.67	4.17	16	4	18.75	0.5		0.000163	0.000491	0.491011	1
1361	Hyal1		0.336718	0.0762192	0.229567	SPIKE	18	0	9	0	12	3	0.5		0.000162	0.00049	0.489183	1
3145	Zfp7		0.336612	0.0762592	0.229567	SPIKE	18	0	9	0	12	3	0.5		0.000163	0.000491	0.491296	1
2745	Tgfb2		0.336527	0.0763492	0.229622	SPIKE	19	17.42	7.92	22	10	4.75	0.5		0.000164	0.000492	0.493019	1
42	9530077C05Rik		0.335757	0.0781992	0.230339	SPIKE	24	2	12.5	2	12.5	6	0.75		0.000169	0.000501	0.508804	1
79	Acot5		0.336067	0.0781492	0.230339	SPIKE	27	0	11.81	0	10.5	6.75	0.75		0.000167	0.000496	0.502391	1
152	Als2cl		0.336067	0.0781492	0.230339	SPIKE	32	8	26	6	19.5	8	0.25		0.000167	0.000496	0.502391	1
186	Apbb2		0.335361	0.0782392	0.230339	SPIKE	24	2	12.5	2	12.5	6	0.75		0.000172	0.000508	0.517121	1
217	Armc3		0.334974	0.0784592	0.230339	ACOS	20	13.33	11.67	16	14	20	0.08		0.000174	0.000512	0.525343	1
484	Cfap206		0.336489	0.0770992	0.230339	SPIKE	18	0	9	0	12	3	0.5		0.000164	0.000492	0.493793	1
566	Cop1		0.335167	0.0783292	0.230339	NSPIKE	28	21	7	18	6	18.67	0.5		0.000173	0.000511	0.521237	1
585	Crhr1		0.336286	0.0781492	0.230339	SPIKE	26	0	14.62	0	13.5	6.5	0.25		0.000165	0.000493	0.497902	1
868	Fbxl13		0.33561	0.0781992	0.230339	SPIKE	32	8	24	6	18	10.67	0.5		0.00017	0.000504	0.511878	1
935	Fstl4		0.336479	0.0770992	0.230339	NSPIKE	24	17.5	4	17.5	4	18	0.75		0.000164	0.000492	0.493983	1
1248	Gpat3		0.335551	0.0781992	0.230339	SPIKE	22	3.67	14.67	4	16	5.5	0.5		0.00017	0.000504	0.513122	1
1305	Hacl1		0.336435	0.0778792	0.230339	NSPIKE	19	1.58	11.08	2	14	14.25	0.5		0.000164	0.000492	0.494887	1
1407	Inpp5d		0.335319	0.0782392	0.230339	ACOS	23	1.92	5.75	2	6	23	0.83		0.000172	0.000508	0.518008	1
1612	Lrfn2		0.334993	0.0784592	0.230339	NSPIKE	28	19.25	7	16.5	6	21	0.25		0.000174	0.000512	0.524939	1
1618	Lrp4		0.335551	0.0781992	0.230339	SPIKE	26	23.83	12.46	22	11.5	6.5	0.25		0.00017	0.000504	0.513122	1
1688	Mdm1		0.336286	0.0781492	0.230339	SPIKE	30	25	11.88	20	9.5	7.5	0.25		0.000165	0.000493	0.497902	1
1712	Mfsd5		0.335066	0.0784592	0.230339	NSPIKE	18	5.62	13.5	7.5	18	13.5	0.75		0.000174	0.000511	0.523388	1
1882	Nepro		0.336067	0.0781492	0.230339	SPIKE	18	12	3	16	4	4.5	0.5		0.000167	0.000496	0.502391	1
2025	Pcgf6		0.336286	0.0781492	0.230339	SPIKE	22	3.67	13.29	4	14.5	5.5	0.75		0.000165	0.000493	0.497902	1
2043	Pds5a		0.336363	0.0778792	0.230339	SPIKE	35	2.92	20.42	2	14	8.75	0.5		0.000165	0.000493	0.49634	1
2050	Peak1		0.335066	0.0784592	0.230339	NSPIKE	25	17.19	6.25	16.5	6	18.75	0.25		0.000174	0.000511	0.523388	1
2448	Sh3d19		0.335137	0.0783292	0.230339	SPIKE	28	14	0	12	0	7	0.5		0.000173	0.000511	0.521863	1
2674	Synrg		0.335037	0.0784592	0.230339	SPIKE	24	0	13.5	0	13.5	6	0.25		0.000174	0.000512	0.524	1
2724	Tedc2		0.336286	0.0781492	0.230339	SPIKE	22	3.67	13.29	4	14.5	5.5	0.75		0.000165	0.000493	0.497902	1
2746	Tgfbr1		0.33583	0.0781992	0.230339	SPIKE	28	14	0	12	0	7	0.5		0.000168	0.0005	0.507287	1
3049	Zbtb40		0.336489	0.0770992	0.230339	SPIKE	32	16	0	12	0	8	0.5		0.000164	0.000492	0.493793	1
350	Card14		0.334664	0.0793992	0.23098	NSPIKE	20	16.25	5	19.5	6	15	0.75		0.000177	0.000515	0.532037	1
642	Dand5		0.334664	0.0793992	0.23098	NSPIKE	20	0	10	0	12	15	0.5		0.000177	0.000515	0.532037	1
711	Dnajc25		0.334601	0.0793992	0.23098	SPIKE	28	0	15.75	0	13.5	7	0.25		0.000177	0.000515	0.533411	1
769	Egflam		0.334607	0.0793992	0.23098	SPIKE	18	0	9	0	12	3	0.5		0.000177	0.000515	0.533282	1
849	Fam229b		0.334607	0.0793992	0.23098	SPIKE	32	24	8	18	6	8	0.5		0.000177	0.000515	0.533282	1
1525	Krt14		0.334607	0.0793992	0.23098	SPIKE	24	12	0	12	0	8	0.5		0.000177	0.000515	0.533282	1
2047	Pdzd7		0.334801	0.0793992	0.23098	SPIKE	26	23.83	12.46	22	11.5	6.5	0.25		0.000176	0.000514	0.529079	1
2666	Susd3		0.334664	0.0793992	0.23098	NSPIKE	20	0	10	0	12	15	0.5		0.000177	0.000515	0.532037	1
2757	Tia1		0.334827	0.0793992	0.23098	SPIKE	27	0	11.81	0	10.5	6.75	0.75		0.000175	0.000514	0.528519	1
2956	Usp28		0.334875	0.0790392	0.23098	SPIKE	26	23.83	10.83	22	10	6.5	0.5		0.000175	0.000513	0.527481	1
65	Abl2		0.33444	0.0817092	0.236981	SPIKE	23	3.83	13.9	4	14.5	5.75	0.75		0.000178	0.000518	0.536925	1
199	Arhgap22		0.333687	0.0823592	0.236981	SPIKE	24	0	13.5	0	13.5	6	0.25		0.000184	0.000529	0.553637	1
394	Ccdc78		0.333732	0.0823592	0.236981	SPIKE	24	2	12.5	2	12.5	6	0.75		0.000183	0.000529	0.552624	1
432	Cdh19		0.333649	0.0823592	0.236981	SPIKE	24	4	14.5	4	14.5	6	0.75		0.000184	0.00053	0.554495	1
1424	Itga2		0.334229	0.0822892	0.236981	SPIKE	18	0	9	0	12	3	0.5		0.00018	0.000522	0.541549	1
1432	Itpr2		0.333998	0.0822892	0.236981	SPIKE	26	23.83	12.46	22	11.5	6.5	0.25		0.000181	0.000524	0.546664	1
1458	Kcnh1		0.333732	0.0823592	0.236981	SPIKE	24	2	12.5	2	12.5	6	0.75		0.000183	0.000529	0.552624	1
1624	Lrrc29		0.334059	0.0822892	0.236981	ACOS	28	0	4.67	0	4	28	0.83		0.000181	0.000524	0.545318	1
1693	Med17		0.333627	0.0824992	0.236981	SPIKE	27	6.75	21.94	6	19.5	6.75	0.25		0.000184	0.00053	0.554998	1
2052	Peli2		0.33414	0.0822892	0.236981	SPIKE	18	0	7.88	0	10.5	4.5	0.75		0.00018	0.000522	0.543523	1
2353	Rps6kl1		0.333571	0.0824992	0.236981	ACOS	24	0	0	0	0	24	0		0.000185	0.00053	0.556255	1
2525	Slc38a2		0.334168	0.0822892	0.236981	NSPIKE	25	18.75	6.25	18	6	20.83	0.5		0.00018	0.000522	0.542903	1
2625	Ssh1		0.334202	0.0822892	0.236981	SPIKE	19	15.83	7.52	20	9.5	4.75	0.25		0.00018	0.000522	0.542155	1
2698	Tbc1d12		0.333704	0.0823592	0.236981	ACOS	19	4.75	17.42	6	22	19	0.33		0.000184	0.000529	0.553263	1
3096	Zfp341		0.333434	0.0825792	0.236999	SPIKE	23	3.83	13.9	4	14.5	5.75	0.75		0.000186	0.000533	0.559349	1
907	Flnb		0.333333	0.0835192	0.238626	SPIKE	24	0	12	0	12	4	0.5		0.000186	0.000533	0.561654	1
1559	Lhx2		0.333333	0.0835192	0.238626	SPIKE	24	0	12	0	12	4	0.5		0.000186	0.000533	0.561654	1
2303	Rgs3		0.333344	0.0835192	0.238626	NSPIKE	29	16.92	2.42	14	2	24.17	0.5		0.000186	0.000533	0.561407	1
2755	Thrb		0.333176	0.0835192	0.238626	SPIKE	24	4	14.5	4	14.5	6	0.75		0.000188	0.000536	0.565261	1
3052	Zbtb7b		0.333333	0.0835192	0.238626	SPIKE	24	0	12	0	12	4	0.5		0.000186	0.000533	0.561654	1
2691	Taf8		0.332722	0.0840992	0.239855	ACOS	33	0	0	0	0	33	0		0.000191	0.000545	0.575782	1
2692	Tafa4		0.332943	0.0840392	0.239855	SPIKE	19	7.92	16.23	10	20.5	4.75	0.75		0.000189	0.000541	0.570621	1
1652	Maml2		0.332564	0.0848192	0.241263	SPIKE	32	24	8	18	6	8	0.5		0.000192	0.000547	0.579464	1
2221	Pus7		0.332627	0.0848192	0.241263	NSPIKE	24	18.5	8	18.5	8	18	0.25		0.000192	0.000547	0.578002	1
2562	Slitrk2		0.332564	0.0848192	0.241263	SPIKE	18	0	7.88	0	10.5	4.5	0.75		0.000192	0.000547	0.579485	1
799	Ephx2		0.332137	0.0865791	0.245615	ACOS	24	22	22	22	22	24	0		0.000196	0.000556	0.589602	1
1444	Kank3		0.332099	0.0865791	0.245615	SPIKE	24	2	12.5	2	12.5	6	0.75		0.000196	0.000556	0.590503	1
2073	Phkg1		0.332086	0.0865791	0.245615	SPIKE	24	0	12	0	12	4	0.5		0.000196	0.000556	0.590803	1
284	Bend3		0.331106	0.0877191	0.246445	SPIKE	24	12	0	12	0	8	0.5		0.000204	0.000574	0.614713	1
413	Cd36		0.33197	0.0871691	0.246445	SPIKE	26	23.83	10.83	22	10	6.5	0.5		0.000197	0.000557	0.593592	1
549	Cntn3		0.331693	0.0876391	0.246445	NSPIKE	20	0	10	0	12	15	0.5		0.000199	0.000563	0.600294	1
569	Coro6		0.33197	0.0871691	0.246445	SPIKE	30	0	13.12	0	10.5	7.5	0.75		0.000197	0.000557	0.593592	1
803	Eps8l1		0.331106	0.0877191	0.246445	SPIKE	32	24	8	18	6	8	0.5		0.000204	0.000574	0.614713	1
968	Gga3		0.331535	0.0876391	0.246445	NSPIKE	34	12.04	31.17	8.5	22	25.5	0.25		0.000201	0.000566	0.604142	1
1302	H2-Q5		0.332002	0.0871691	0.246445	SPIKE	20	18.33	7.08	22	8.5	5	0.75		0.000197	0.000557	0.592819	1
1771	Mtmr1		0.331624	0.0876391	0.246445	SPIKE	35	2.92	20.42	2	14	11.67	0.5		0.0002	0.000564	0.601966	1
2003	Palmd		0.331106	0.0877191	0.246445	SPIKE	18	0	9	0	12	3	0.5		0.000204	0.000574	0.614713	1
2049	Pdzrn3		0.331056	0.0877191	0.246445	SPIKE	26	4.33	15.71	4	14.5	6.5	0.75		0.000204	0.000574	0.615953	1
3151	Zfp740		0.3314	0.0876491	0.246445	SPIKE	30	22.5	9.38	18	7.5	7.5	0.25		0.000202	0.000568	0.60745	1
788	Enpp4		0.330862	0.0883291	0.247291	SPIKE	27	0	11.81	0	10.5	6.75	0.75		0.000206	0.000577	0.620788	1
1695	Meig1		0.330895	0.0883291	0.247291	SPIKE	20	5	13.75	6	16.5	5	0.75		0.000206	0.000577	0.619966	1
2615	Spidr		0.330964	0.0881991	0.247291	SPIKE	20	5	15	6	18	6.67	0.5		0.000205	0.000576	0.618243	1
3185	Zkscan2		0.330895	0.0883291	0.247291	SPIKE	20	6.67	15.42	8	18.5	5	0.75		0.000206	0.000577	0.619966	1
282	Bdp1		0.330668	0.0893091	0.249319	NSPIKE	23	19.17	7.67	20	8	15.33	0.5		0.000208	0.00058	0.625677	1
470	Cep152		0.330246	0.0895991	0.249319	SPIKE	30	25	11.88	20	9.5	7.5	0.25		0.000211	0.000588	0.63642	1
489	Cfap61		0.330728	0.0893091	0.249319	SPIKE	19	6.33	15.83	8	20	3.17	0.5		0.000207	0.000579	0.624153	1
779	Emcn		0.330246	0.0895991	0.249319	SPIKE	22	0	12.38	0	13.5	5.5	0.25		0.000211	0.000588	0.63642	1
1247	Gp1bb		0.33026	0.0895991	0.249319	SPIKE	23	1.92	13.42	2	14	5.75	0.5		0.000211	0.000588	0.63605	1
1446	Kat2a		0.33026	0.0895991	0.249319	SPIKE	22	0	12.38	0	13.5	5.5	0.25		0.000211	0.000588	0.63605	1
1945	Nudcd1		0.330492	0.0893691	0.249319	SPIKE	32	24	8	18	6	8	0.5		0.000209	0.000584	0.630128	1
2560	Slfn5		0.330232	0.0905891	0.251855	SPIKE	18	6	16.12	8	21.5	4.5	0.25		0.000211	0.000588	0.636772	1
3113	Zfp455		0.329949	0.0907091	0.25197	SPIKE	29	12.08	24.77	10	20.5	7.25	0.75		0.000214	0.000594	0.644075	1
1509	Klhl15		0.32985	0.0921491	0.255748	SPIKE	34	2.83	19.83	2	14	8.5	0.5		0.000215	0.000596	0.646638	1
69	Abraxas1		0.329037	0.0934691	0.256401	SPIKE	18	0	7.88	0	10.5	4.5	0.75		0.000222	0.000612	0.668147	1
100	Adam17		0.329219	0.0928591	0.256401	SPIKE	28	23.33	11.08	20	9.5	7	0.25		0.00022	0.000609	0.663257	1
188	Apcdd1		0.329045	0.0934691	0.256401	NSPIKE	27	17.44	2.25	15.5	2	20.25	0.75		0.000222	0.000612	0.667921	1
355	Casp2		0.328528	0.0949491	0.256401	SPIKE	24	2	12.5	2	12.5	6	0.75		0.000226	0.000616	0.681939	1
429	Cdc45		0.328684	0.0948991	0.256401	SPIKE	30	22.5	7.5	18	6	5	0.5		0.000225	0.000616	0.677665	1
531	Clmp		0.328644	0.0949491	0.256401	SPIKE	27	0	11.81	0	10.5	6.75	0.75		0.000225	0.000616	0.678765	1
565	Colq		0.328219	0.095099	0.256401	SPIKE	18	12	3	16	4	4.5	0.5		0.000229	0.000619	0.690428	1
608	Cutal		0.328571	0.0949491	0.256401	SPIKE	24	2	12.5	2	12.5	6	0.75		0.000226	0.000616	0.680746	1
665	Ddi2		0.328219	0.095099	0.256401	SPIKE	27	0	11.81	0	10.5	6.75	0.75		0.000229	0.000619	0.690428	1
749	E130308A19Rik		0.328684	0.0948991	0.256401	SPIKE	30	22.5	7.5	18	6	5	0.5		0.000225	0.000616	0.677665	1
917	Fnip2		0.329219	0.0928591	0.256401	SPIKE	26	0	14.62	0	13.5	6.5	0.25		0.00022	0.000609	0.663257	1
924	Foxn2		0.328537	0.0949491	0.256401	NSPIKE	24	20.5	10	20.5	10	18	0.25		0.000226	0.000616	0.681689	1
1138	Gm36423		0.328537	0.0949491	0.256401	NSPIKE	24	20	8	20	8	20	0.5		0.000226	0.000616	0.681689	1
1268	Gramd1a		0.328537	0.0949491	0.256401	NSPIKE	24	20	8	20	8	20	0.5		0.000226	0.000616	0.681689	1
1319	Heatr5a		0.327872	0.095189	0.256401	SPIKE	30	22.5	9.38	18	7.5	7.5	0.25		0.000232	0.000626	0.700115	1
1506	Kl		0.328443	0.0949491	0.256401	SPIKE	32	5.33	21.33	4	16	5.33	0.5		0.000227	0.000617	0.68426	1
1530	Ksr2		0.329261	0.0928591	0.256401	SPIKE	26	23.83	10.83	22	10	8.67	0.5		0.00022	0.000609	0.66214	1
1541	Lats2		0.328795	0.0948991	0.256401	NSPIKE	28	19.25	7	16.5	6	21	0.25		0.000224	0.000616	0.674674	1
1573	Lmo3		0.328625	0.0949491	0.256401	SPIKE	18	7.5	15.38	10	20.5	4.5	0.75		0.000225	0.000616	0.679289	1
1665	Mapk7		0.328537	0.0949491	0.256401	NSPIKE	27	4.5	18	4	16	22.5	0.5		0.000226	0.000616	0.681689	1
1775	Mtrf1l		0.328537	0.0949491	0.256401	NSPIKE	24	20	8	20	8	20	0.5		0.000226	0.000616	0.681689	1
2150	Ppef2		0.328219	0.095099	0.256401	SPIKE	22	5.5	15.12	6	16.5	5.5	0.75		0.000229	0.000619	0.690428	1
2153	Ppip5k2		0.328537	0.0949491	0.256401	NSPIKE	24	20	8	20	8	20	0.5		0.000226	0.000616	0.681689	1
2155	Ppm1k		0.328674	0.0949491	0.256401	NSPIKE	18	11.62	1.5	15.5	2	13.5	0.75		0.000225	0.000616	0.677957	1
2191	Prrg2		0.328113	0.095159	0.256401	SPIKE	26	23.83	12.46	22	11.5	6.5	0.25		0.00023	0.000621	0.693378	1
2378	Safb2		0.328266	0.095069	0.256401	SPIKE	25	0	10.94	0	10.5	6.25	0.75		0.000229	0.000619	0.689135	1
2392	Scai		0.327965	0.095159	0.256401	SPIKE	24	0	13.5	0	13.5	6	0.25		0.000231	0.000624	0.697503	1
2423	Serpina3n		0.329234	0.0928591	0.256401	SPIKE	23	3.83	13.9	4	14.5	5.75	0.75		0.00022	0.000609	0.662869	1
2447	Sh3bp4		0.328537	0.0949491	0.256401	NSPIKE	24	20.5	10	20.5	10	18	0.25		0.000226	0.000616	0.681689	1
2809	Tnfrsf25		0.328219	0.095099	0.256401	SPIKE	27	0	11.81	0	10.5	6.75	0.75		0.000229	0.000619	0.690428	1
2821	Top2a		0.328219	0.095099	0.256401	SPIKE	22	5.5	15.12	6	16.5	5.5	0.75		0.000229	0.000619	0.690428	1
2886	Tsga10		0.32848	0.0949491	0.256401	NSPIKE	24	18	6	18	6	16	0.5		0.000227	0.000617	0.683236	1
2974	Vip		0.328113	0.095159	0.256401	SPIKE	22	0	12.38	0	13.5	5.5	0.25		0.00023	0.000621	0.693378	1
3037	Yipf7		0.328244	0.095099	0.256401	NSPIKE	32	16	0	12	0	21.33	0.5		0.000229	0.000619	0.689746	1
3186	Zmat4		0.328644	0.0949491	0.256401	SPIKE	27	0	11.81	0	10.5	6.75	0.75		0.000225	0.000616	0.678765	1
2083	Pik3c2b		0.32769	0.095309	0.256509	SPIKE	21	1.75	12.25	2	14	5.25	0.5		0.000234	0.00063	0.705228	1
1188	Gm51950		0.327618	0.097119	0.260941	SPIKE	21	7	16.19	8	18.5	5.25	0.75		0.000235	0.000631	0.707252	1
1689	Mdm4		0.327573	0.097119	0.260941	NSPIKE	28	19.25	7	16.5	6	21	0.25		0.000235	0.000632	0.708532	1
3136	Zfp65		0.327296	0.098199	0.263622	SPIKE	19	6.33	14.65	8	18.5	4.75	0.75		0.000238	0.000638	0.716438	1
3078	Zfp142		0.326939	0.099789	0.267441	ACOS	18	12	13.5	16	18	18	0.92		0.000241	0.000646	0.726734	1
3144	Zfp692		0.327046	0.099789	0.267441	SPIKE	35	2.92	20.42	2	14	11.67	0.5		0.00024	0.000644	0.723616	1
314	C2cd4c		0.326537	0.100939	0.26809	SPIKE	32	16	0	12	0	10.67	0.5		0.000245	0.000655	0.738489	1
658	Dcp1a		0.326609	0.100929	0.26809	SPIKE	24	0	13.5	0	13.5	6	0.25		0.000244	0.000653	0.736365	1
689	Dipk1c		0.325641	0.101499	0.26809	SPIKE	28	14	0	12	0	7	0.5		0.000254	0.000672	0.765323	1
820	Exo5		0.326059	0.101119	0.26809	SPIKE	24	4	14.5	4	14.5	6	0.75		0.00025	0.000665	0.752709	1
884	Fcgr3		0.326642	0.100799	0.26809	SPIKE	22	0	12.38	0	13.5	5.5	0.25		0.000244	0.000653	0.73541	1
1180	Gm4865		0.326054	0.101119	0.26809	SPIKE	35	8.75	26.25	6	18	11.67	0.5		0.00025	0.000665	0.752854	1
1447	Kat6b		0.32589	0.101499	0.26809	SPIKE	25	0	10.94	0	10.5	6.25	0.75		0.000252	0.000669	0.757779	1
1668	Marchf8		0.325723	0.101499	0.26809	NSPIKE	32	16.67	2.67	12.5	2	24	0.25		0.000253	0.000672	0.762851	1
1686	Mcur1		0.325583	0.101499	0.26809	SPIKE	24	0	12	0	12	4	0.5		0.000255	0.000673	0.767115	1
1870	Ndufa2		0.325494	0.101539	0.26809	SPIKE	24	14	0.5	14	0.5	6	0.75		0.000256	0.000675	0.769842	1
1974	Olfr91		0.325641	0.101499	0.26809	SPIKE	24	0	12	0	12	4	0.5		0.000254	0.000672	0.765323	1
2249	Ranbp17		0.32569	0.101499	0.26809	SPIKE	34	19.83	2.83	14	2	8.5	0.5		0.000254	0.000672	0.763832	1
2263	Rbm10		0.32575	0.101499	0.26809	SPIKE	24	0	13.5	0	13.5	6	0.25		0.000253	0.000672	0.762021	1
2314	Ripor2		0.325791	0.101499	0.26809	SPIKE	24	0	12	0	12	4	0.5		0.000253	0.000671	0.760787	1
2383	Samhd1		0.32569	0.101499	0.26809	SPIKE	26	2.17	13.54	2	12.5	6.5	0.75		0.000254	0.000672	0.763832	1
2775	Tmem101		0.32623	0.101009	0.26809	ACOS	19	6.33	14.25	8	18	19	0.58		0.000248	0.000662	0.747597	1
2922	Tubd1		0.326324	0.101009	0.26809	SPIKE	18	10.5	0.38	14	0.5	4.5	0.75		0.000247	0.00066	0.744796	1
3165	Zfp85		0.326732	0.100789	0.26809	SPIKE	27	0	11.81	0	10.5	6.75	0.75		0.000243	0.000651	0.73276	1
1604	Loxl2		0.325187	0.103119	0.271813	ACOS	18	6	4.5	8	6	18	0.08		0.000259	0.000682	0.779297	1
1674	Mavs		0.325316	0.103099	0.271813	SPIKE	20	1.67	10.42	2	12.5	5	0.75		0.000257	0.000679	0.775302	1
2760	Tigar		0.325094	0.103799	0.273155	NSPIKE	18	11.62	1.5	15.5	2	13.5	0.75		0.00026	0.000684	0.782168	1
2869	Trmt6		0.325017	0.103799	0.273155	NSPIKE	29	16.92	2.42	14	2	24.17	0.5		0.00026	0.000685	0.784586	1
38	9030622O22Rik		0.323221	0.107079	0.275444	SPIKE	24	20	9.5	20	9.5	6	0.25		0.00028	0.000719	0.842475	1
86	Acr		0.323221	0.107079	0.275444	SPIKE	30	25	11.88	20	9.5	7.5	0.25		0.00028	0.000719	0.842475	1
149	Alkbh3		0.324362	0.105809	0.275444	NSPIKE	22	18.79	9.17	20.5	10	16.5	0.25		0.000267	0.000699	0.805247	1
277	Bcl11b		0.324722	0.105429	0.275444	ACOS	33	0	0	0	0	33	0		0.000263	0.000691	0.793838	1
329	Cacna1h		0.324772	0.105429	0.275444	SPIKE	23	1.92	13.42	2	14	7.67	0.5		0.000263	0.00069	0.792261	1
377	Ccdc13		0.323773	0.106979	0.275444	SPIKE	32	21.33	7.33	16	5.5	8	0.25		0.000274	0.00071	0.824265	1
418	Cd55		0.32369	0.106989	0.275444	SPIKE	20	5	15	6	18	6.67	0.5		0.000274	0.000712	0.826991	1
695	Dlec1		0.324207	0.105919	0.275444	SPIKE	18	6	15	8	20	3	0.5		0.000269	0.000702	0.810222	1
775	Elf2		0.324851	0.105429	0.275444	NSPIKE	24	20.5	10	20.5	10	18	0.25		0.000262	0.000689	0.789776	1
857	Fancg		0.323221	0.107079	0.275444	SPIKE	23	5.75	18.69	6	19.5	5.75	0.25		0.00028	0.000719	0.842475	1
1097	Gm26803		0.323221	0.107079	0.275444	SPIKE	22	0	12.38	0	13.5	5.5	0.25		0.00028	0.000719	0.842475	1
1129	Gm34589		0.323221	0.107079	0.275444	SPIKE	22	3.67	13.29	4	14.5	5.5	0.75		0.00028	0.000719	0.842475	1
1276	Grik4		0.323909	0.106979	0.275444	SPIKE	30	25	11.88	20	9.5	7.5	0.25		0.000272	0.000709	0.819849	1
1522	Krba1		0.324866	0.105429	0.275444	NSPIKE	28	19.25	7	16.5	6	21	0.25		0.000262	0.000689	0.789291	1
1637	Lsp1		0.324207	0.105919	0.275444	SPIKE	18	0	9	0	12	3	0.5		0.000269	0.000702	0.810222	1
1673	Mau2		0.323854	0.106979	0.275444	SPIKE	34	14.17	29.04	10	20.5	8.5	0.75		0.000273	0.00071	0.821626	1
1879	Nek3		0.323773	0.106979	0.275444	SPIKE	25	0	10.94	0	10.5	6.25	0.75		0.000274	0.00071	0.824265	1
2086	Pik3r4		0.323964	0.106979	0.275444	ACOS	23	11.5	9.58	12	10	23	0.08		0.000272	0.000708	0.818068	1
2087	Pikfyve		0.323765	0.106979	0.275444	SPIKE	24	0	13.5	0	13.5	6	0.25		0.000274	0.00071	0.824546	1
2171	Prdm16		0.324375	0.105809	0.275444	SPIKE	20	16.67	7.92	20	9.5	5	0.25		0.000267	0.000699	0.804847	1
2299	Rgmb		0.324787	0.105429	0.275444	SPIKE	18	7.5	15.38	10	20.5	4.5	0.75		0.000263	0.00069	0.791761	1
2307	Rhoq		0.323214	0.107079	0.275444	NSPIKE	24	20	8	20	8	20	0.5		0.00028	0.000719	0.842704	1
2335	Rnpep		0.324261	0.105919	0.275444	SPIKE	21	3.5	12.69	4	14.5	5.25	0.75		0.000268	0.000702	0.808478	1
2393	Scel		0.323221	0.107079	0.275444	SPIKE	22	0	12.38	0	13.5	5.5	0.25		0.00028	0.000719	0.842475	1
2647	Stk26		0.323221	0.107079	0.275444	SPIKE	28	11.67	25.67	10	22	9.33	0.5		0.00028	0.000719	0.842475	1
2991	Vwa3a		0.323221	0.107079	0.275444	SPIKE	22	0	12.38	0	13.5	5.5	0.25		0.00028	0.000719	0.842475	1
3123	Zfp568		0.323221	0.107079	0.275444	SPIKE	30	25	11.88	20	9.5	7.5	0.25		0.00028	0.000719	0.842475	1
3154	Zfp759		0.32381	0.106979	0.275444	SPIKE	24	2	12.5	2	12.5	6	0.75		0.000273	0.00071	0.82308	1
2612	Spg21		0.323145	0.107359	0.275943	NSPIKE	27	4.5	18	4	16	22.5	0.5		0.00028	0.000721	0.845018	1
3	1700010I14Rik		0.322064	0.112009	0.279598	SPIKE	31	0	13.56	0	10.5	7.75	0.75		0.000293	0.000733	0.881852	1
12	2200002J24Rik		0.322252	0.111959	0.279598	SPIKE	22	5.5	15.12	6	16.5	5.5	0.75		0.000291	0.000733	0.875363	1
109	Adamtsl2		0.322762	0.111069	0.279598	SPIKE	18	6	15	8	20	3	0.5		0.000285	0.000729	0.857899	1
190	Apmap		0.321798	0.112189	0.279598	SPIKE	22	0	12.38	0	13.5	5.5	0.25		0.000296	0.000737	0.891164	1
675	Deaf1		0.322118	0.112009	0.279598	SPIKE	32	24	10	18	7.5	8	0.25		0.000292	0.000733	0.880001	1
683	Dgkd		0.322021	0.112009	0.279598	NSPIKE	28	19.25	7	16.5	6	21	0.25		0.000293	0.000733	0.883362	1
827	Ezh1		0.322126	0.111959	0.279598	NSPIKE	18	11.62	1.5	15.5	2	13.5	0.75		0.000292	0.000733	0.879699	1
836	Fam122b		0.322416	0.111959	0.279598	SPIKE	25	0	10.94	0	10.5	6.25	0.75		0.000289	0.000733	0.869716	1
885	Fcho1		0.322968	0.111069	0.279598	SPIKE	35	0	19.69	0	13.5	8.75	0.25		0.000282	0.000725	0.850945	1
953	Gbp3		0.322031	0.112009	0.279598	SPIKE	34	28.33	9.21	20	6.5	8.5	0.75		0.000293	0.000733	0.883029	1
980	Glis3		0.322118	0.112009	0.279598	SPIKE	32	8	24	6	18	10.67	0.5		0.000292	0.000733	0.880001	1
1031	Gm20208		0.322416	0.111959	0.279598	SPIKE	30	22.5	9.38	18	7.5	7.5	0.25		0.000289	0.000733	0.869716	1
1165	Gm45445		0.322073	0.112009	0.279598	SPIKE	29	4.83	21.15	4	17.5	7.25	0.25		0.000293	0.000733	0.881556	1
1184	Gm4951		0.322064	0.112009	0.279598	SPIKE	19	0	8.31	0	10.5	4.75	0.75		0.000293	0.000733	0.881852	1
1226	Gm9006		0.322031	0.112009	0.279598	SPIKE	18	1.5	11.62	2	15.5	4.5	0.25		0.000293	0.000733	0.883029	1
1357	Htra3		0.322001	0.112009	0.279598	SPIKE	19	6.33	15.83	8	20	3.17	0.5		0.000293	0.000733	0.884047	1
1366	Idua		0.322031	0.112009	0.279598	SPIKE	34	28.33	9.21	20	6.5	8.5	0.75		0.000293	0.000733	0.883029	1
1376	Igsf9		0.322064	0.112009	0.279598	SPIKE	27	0	11.81	0	10.5	6.75	0.75		0.000293	0.000733	0.881852	1
1413	Ipcef1		0.322064	0.112009	0.279598	SPIKE	27	0	11.81	0	10.5	6.75	0.75		0.000293	0.000733	0.881852	1
1660	Map3k9		0.321924	0.112109	0.279598	SPIKE	24	2	12.5	2	12.5	6	0.75		0.000294	0.000735	0.886739	1
1677	Mbnl3		0.322064	0.112009	0.279598	SPIKE	24	22	10	22	10	8	0.5		0.000293	0.000733	0.881852	1
1704	Mettl4		0.322762	0.111069	0.279598	SPIKE	21	1.75	12.25	2	14	3.5	0.5		0.000285	0.000729	0.857899	1
1706	Mfap3		0.322141	0.111959	0.279598	SPIKE	35	0	19.69	0	13.5	8.75	0.25		0.000292	0.000733	0.879193	1
1983	Osbpl6		0.322212	0.111959	0.279598	SPIKE	34	5.67	20.54	4	14.5	8.5	0.75		0.000291	0.000733	0.876733	1
1989	Otulinl		0.32241	0.111959	0.279598	SPIKE	28	0	14	0	12	7	0.5		0.000289	0.000733	0.869899	1
2218	Ptprr		0.323029	0.111069	0.279598	SPIKE	18	0	9	0	12	3	0.5		0.000282	0.000724	0.848896	1
2269	Rbm41		0.322762	0.111069	0.279598	SPIKE	30	22.5	7.5	18	6	5	0.5		0.000285	0.000729	0.857899	1
2389	Saxo2		0.322711	0.111069	0.279598	SPIKE	35	2.92	20.42	2	14	11.67	0.5		0.000285	0.000729	0.85965	1
2450	Sh3tc1		0.321877	0.112189	0.279598	ACOS	28	16.33	9.33	14	8	28	0.25		0.000295	0.000735	0.888387	1
2454	Shh		0.322118	0.112009	0.279598	SPIKE	22	5.5	15.12	6	16.5	5.5	0.75		0.000292	0.000733	0.880001	1
2462	Shroom4		0.32241	0.111959	0.279598	SPIKE	28	0	14	0	12	7	0.5		0.000289	0.000733	0.869899	1
2533	Slc41a2		0.322064	0.112009	0.279598	SPIKE	22	0	11	0	12	5.5	0.5		0.000293	0.000733	0.881852	1
2561	Slit2		0.322162	0.111959	0.279598	SPIKE	29	24.17	11.48	20	9.5	7.25	0.25		0.000292	0.000733	0.878461	1
2678	Szt2		0.322416	0.111959	0.279598	SPIKE	32	26.67	8.67	20	6.5	8	0.75		0.000289	0.000733	0.869716	1
2938	Ubap1l		0.322711	0.111069	0.279598	SPIKE	19	6.33	15.83	8	20	4.75	0.5		0.000285	0.000729	0.85965	1
3015	Wipf3		0.322064	0.112009	0.279598	SPIKE	27	0	11.81	0	10.5	6.75	0.75		0.000293	0.000733	0.881852	1
3021	Wsb1		0.322233	0.111959	0.279598	NSPIKE	18	3	12	4	16	13.5	0.5		0.000291	0.000733	0.875993	1
3048	Zbtb34		0.322711	0.111069	0.279598	SPIKE	33	27.5	11	20	8	11	0.5		0.000285	0.000729	0.85965	1
3112	Zfp446		0.322118	0.112009	0.279598	SPIKE	32	24	10	18	7.5	8	0.25		0.000292	0.000733	0.880001	1
862	Fat4		0.321612	0.112639	0.279848	NSPIKE	24	17.5	4	17.5	4	18	0.75		0.000298	0.000741	0.89771	1
1600	LOC118568699		0.32148	0.112639	0.279848	SPIKE	29	12.08	24.77	10	20.5	7.25	0.75		0.0003	0.000744	0.902398	1
2522	Slc35f4		0.321548	0.112639	0.279848	SPIKE	23	1.92	13.42	2	14	7.67	0.5		0.000299	0.000743	0.899993	1
2773	Tmed5		0.321622	0.112639	0.279848	NSPIKE	21	0	10.5	0	12	17.5	0.5		0.000298	0.000741	0.897358	1
2093	Pkd1		0.32122	0.112829	0.280103	SPIKE	22	0	12.38	0	13.5	5.5	0.25		0.000303	0.000751	0.911673	1
136	Agrp		0.321121	0.113419	0.280479	ACOS	26	0	6.5	0	6	26	0.75		0.000304	0.000751	0.915217	1
1968	Odf3l1		0.321135	0.113419	0.280479	SPIKE	26	0	14.62	0	13.5	6.5	0.25		0.000304	0.000751	0.914712	1
2084	Pik3cd		0.321135	0.113419	0.280479	SPIKE	26	23.83	12.46	22	11.5	6.5	0.25		0.000304	0.000751	0.914712	1
2419	Serpina1a		0.321131	0.113419	0.280479	SPIKE	27	0	11.81	0	10.5	6.75	0.75		0.000304	0.000751	0.914876	1
3053	Zbtb8b		0.321135	0.113419	0.280479	SPIKE	22	0	12.38	0	13.5	5.5	0.25		0.000304	0.000751	0.914712	1
281	Bcorl1		0.321081	0.114359	0.281932	NSPIKE	28	19.25	7	16.5	6	21	0.25		0.000304	0.000751	0.916682	1
352	Casc1		0.321081	0.114359	0.281932	NSPIKE	28	19.25	7	16.5	6	21	0.25		0.000304	0.000751	0.916682	1
1223	Gm8503		0.321081	0.114359	0.281932	NSPIKE	28	19.25	7	16.5	6	21	0.25		0.000304	0.000751	0.916682	1
2177	Prkce		0.320906	0.114359	0.281932	NSPIKE	18	5.62	13.5	7.5	18	13.5	0.75		0.000306	0.000755	0.923014	1
46	A430018G15Rik		0.320826	0.115469	0.28445	SPIKE	35	2.92	20.42	2	14	8.75	0.5		0.000307	0.000757	0.925911	1
305	Btbd3		0.320628	0.117249	0.28844	SPIKE	30	27.5	12.5	22	10	10	0.5		0.00031	0.000762	0.933122	1
2865	Trit1		0.320383	0.117269	0.28844	ACOS	33	0	0	0	0	33	0		0.000313	0.000769	0.942161	1
66	Ablim1		0.319495	0.118979	0.289383	SPIKE	24	0	12	0	12	4	0.5		0.000324	0.000791	0.975515	1
132	Agbl4		0.319439	0.118979	0.289383	SPIKE	30	22.5	7.5	18	6	5	0.5		0.000324	0.000791	0.977669	1
300	Brf1		0.32018	0.118299	0.289383	SPIKE	24	2	12.5	2	12.5	6	0.75		0.000315	0.000775	0.949677	1
332	Cacng7		0.319359	0.118979	0.289383	SPIKE	30	25	11.88	20	9.5	7.5	0.25		0.000326	0.000793	0.980733	1
546	Cnot1		0.319904	0.118649	0.289383	NSPIKE	24	20	8	20	8	20	0.5		0.000319	0.000781	0.96003	1
664	Dcx		0.319285	0.119009	0.289383	SPIKE	21	3.5	12.69	4	14.5	5.25	0.75		0.000326	0.000795	0.983588	1
1892	Nfatc2		0.319438	0.118979	0.289383	SPIKE	18	6	15	8	20	6	0.5		0.000324	0.000791	0.977696	1
1927	Npvf		0.319882	0.118649	0.289383	SPIKE	34	28.33	11.33	20	8	5.67	0.5		0.000319	0.000781	0.960864	1
2154	Ppm1b		0.320138	0.118649	0.289383	ACOS	33	16.5	16.5	12	12	33	0		0.000316	0.000775	0.951243	1
2500	Slc25a43		0.319723	0.118749	0.289383	SPIKE	22	0	12.38	0	13.5	5.5	0.25		0.000321	0.000786	0.966866	1
2726	Tenm1		0.319268	0.119009	0.289383	SPIKE	23	3.83	13.9	4	14.5	5.75	0.75		0.000327	0.000795	0.984239	1
2884	Trps1		0.319262	0.119009	0.289383	SPIKE	24	2	12.5	2	12.5	6	0.75		0.000327	0.000795	0.984466	1
2983	Vrk1		0.319903	0.118649	0.289383	SPIKE	23	1.92	11.98	2	12.5	5.75	0.75		0.000319	0.000781	0.960064	1
3147	Zfp715		0.319438	0.118979	0.289383	SPIKE	27	0	11.81	0	10.5	6.75	0.75		0.000324	0.000791	0.977696	1
3168	Zfp93		0.319438	0.118979	0.289383	SPIKE	27	0	11.81	0	10.5	6.75	0.75		0.000324	0.000791	0.977696	1
343	Capn5		0.318708	0.121229	0.293443	NSPIKE	28	19.25	7	16.5	6	21	0.25		0.000334	0.000808	1.00604	1
1029	Gm19786		0.318708	0.121229	0.293443	SPIKE	24	14	0.5	14	0.5	6	0.75		0.000334	0.000808	1.00604	1
1377	Igsf9b		0.318708	0.121229	0.293443	SPIKE	19	6.33	15.83	8	20	3.17	0.5		0.000334	0.000808	1.00604	1
2016	Pax7		0.31917	0.120879	0.293443	SPIKE	20	15	3.75	18	4.5	5	0.75		0.000328	0.000797	0.988015	1
2296	Rfxap		0.318708	0.121229	0.293443	SPIKE	18	6	15	8	20	3	0.5		0.000334	0.000808	1.00604	1
2996	Wasf1		0.318763	0.121149	0.293443	NSPIKE	26	19.5	6.5	18	6	19.5	0.5		0.000333	0.000808	1.00386	1
701	Dmrtc1b		0.31855	0.121619	0.293499	SPIKE	23	1.92	13.42	2	14	7.67	0.5		0.000336	0.00081	1.01225	1
737	Dtx2		0.318622	0.121619	0.293499	SPIKE	24	0	12	0	12	4	0.5		0.000335	0.00081	1.00939	1
1457	Kcnc2		0.318594	0.121619	0.293499	SPIKE	24	2	14	2	14	6	0.5		0.000335	0.00081	1.01049	1
1497	Kif3b		0.318543	0.121619	0.293499	SPIKE	18	0	9	0	12	3	0.5		0.000336	0.00081	1.01254	1
541	Cnksr2		0.318067	0.123699	0.296729	NSPIKE	22	18.33	7.33	20	8	16.5	0.5		0.000342	0.000821	1.03151	1
876	Fbxo30		0.318508	0.123669	0.296729	SPIKE	18	12	1.88	16	2.5	4.5	0.75		0.000337	0.00081	1.01393	1
1728	Mllt10		0.318451	0.123669	0.296729	SPIKE	26	21.67	10.29	20	9.5	6.5	0.25		0.000337	0.000811	1.01618	1
1747	Mpdz		0.318318	0.123699	0.296729	NSPIKE	33	13.75	30.25	10	22	27.5	0.5		0.000339	0.000814	1.02147	1
1798	Mylip		0.31842	0.123669	0.296729	SPIKE	19	0	8.31	0	10.5	4.75	0.75		0.000338	0.000812	1.01742	1
2283	Recql5		0.318508	0.123669	0.296729	SPIKE	26	23.83	10.83	22	10	6.5	0.5		0.000337	0.00081	1.01393	1
3054	Zc2hc1c		0.318382	0.123669	0.296729	SPIKE	28	23.33	11.08	20	9.5	7	0.25		0.000338	0.000812	1.01893	1
3057	Zc3hav1		0.318508	0.123669	0.296729	SPIKE	18	12	1.88	16	2.5	4.5	0.75		0.000337	0.00081	1.01393	1
102	Adamts13		0.31743	0.126139	0.297673	SPIKE	19	15.83	7.52	20	9.5	4.75	0.25		0.000351	0.00083	1.05743	1
356	Casp3		0.317669	0.126069	0.297673	SPIKE	19	6.33	15.83	8	20	3.17	0.5		0.000348	0.00083	1.04764	1
473	Cep55		0.317397	0.126139	0.297673	SPIKE	24	22	10	22	10	8	0.5		0.000351	0.00083	1.0588	1
616	Cyb5r2		0.317397	0.126139	0.297673	SPIKE	35	29.17	11.67	20	8	11.67	0.5		0.000351	0.00083	1.05878	1
802	Eps15l1		0.317709	0.126069	0.297673	NSPIKE	18	5.62	13.5	7.5	18	13.5	0.75		0.000347	0.00083	1.04601	1
934	Fsip1		0.317397	0.126139	0.297673	SPIKE	18	6	15	8	20	6	0.5		0.000351	0.00083	1.0588	1
1145	Gm39124		0.317358	0.126139	0.297673	SPIKE	20	6.67	15.42	8	18.5	5	0.75		0.000352	0.000831	1.06042	1
1231	Gm9237		0.317644	0.126069	0.297673	SPIKE	18	0	9	0	12	3	0.5		0.000348	0.00083	1.04864	1
1244	Gnpat		0.317814	0.124629	0.297673	ACOS	33	0	0	0	0	33	0		0.000346	0.000828	1.04172	1
1338	Hmg20b		0.317669	0.126069	0.297673	SPIKE	31	25.83	8.4	20	6.5	7.75	0.75		0.000348	0.00083	1.04764	1
1387	Il15		0.317397	0.126139	0.297673	SPIKE	20	15	5	18	6	6.67	0.5		0.000351	0.00083	1.0588	1
1418	Irak2		0.317631	0.126069	0.297673	ACOS	33	16.5	16.5	12	12	33	0		0.000348	0.00083	1.04919	1
1615	Lrmda		0.317916	0.124629	0.297673	SPIKE	27	9	24.19	8	21.5	6.75	0.25		0.000344	0.000825	1.03761	1
1696	Meiob		0.317397	0.126139	0.297673	SPIKE	32	24	8	18	6	10.67	0.5		0.000351	0.00083	1.0588	1
1735	Mmp9		0.317397	0.126139	0.297673	SPIKE	24	22	10	22	10	8	0.5		0.000351	0.00083	1.0588	1
1737	Mob3a		0.317397	0.126139	0.297673	NSPIKE	18	12.38	4.5	16.5	6	13.5	0.25		0.000351	0.00083	1.0588	1
1916	Nod2		0.317397	0.126139	0.297673	SPIKE	22	0	12.38	0	13.5	5.5	0.25		0.000351	0.00083	1.05878	1
2472	Sirt4		0.317397	0.126139	0.297673	SPIKE	26	2.17	15.17	2	14	6.5	0.5		0.000351	0.00083	1.05878	1
2476	Skor1		0.317397	0.126139	0.297673	SPIKE	26	2.17	15.17	2	14	6.5	0.5		0.000351	0.00083	1.05878	1
2478	Slc10a1		0.317397	0.126139	0.297673	SPIKE	22	3.67	13.29	4	14.5	5.5	0.75		0.000351	0.00083	1.05878	1
2729	Tepsin		0.31743	0.126139	0.297673	SPIKE	18	12	1.88	16	2.5	4.5	0.75		0.000351	0.00083	1.05743	1
3130	Zfp62		0.317388	0.126139	0.297673	SPIKE	26	21.67	10.29	20	9.5	6.5	0.25		0.000352	0.00083	1.05916	1
4	1700016H13Rik		0.31658	0.128749	0.299074	SPIKE	21	3.5	12.69	4	14.5	5.25	0.75		0.000363	0.000847	1.09296	1
15	2310022A10Rik		0.316484	0.128789	0.299074	SPIKE	33	11	25.44	8	18.5	8.25	0.75		0.000364	0.000849	1.09706	1
252	Atxn7		0.316972	0.128749	0.299074	NSPIKE	24	20	8	20	8	20	0.5		0.000357	0.000839	1.07647	1
287	Bicral		0.316889	0.128749	0.299074	NSPIKE	34	12.04	31.17	8.5	22	25.5	0.25		0.000358	0.000841	1.07994	1
405	Ccz1		0.316587	0.128749	0.299074	SPIKE	35	2.92	20.42	2	14	8.75	0.5		0.000363	0.000847	1.09266	1
434	Cdh4		0.316254	0.128789	0.299074	SPIKE	25	0	12.5	0	12	8.33	0.5		0.000367	0.000853	1.10687	1
692	Dis3l		0.317216	0.128749	0.299074	NSPIKE	27	4.5	18	4	16	22.5	0.5		0.000354	0.000834	1.06629	1
999	Gm13269		0.316284	0.128789	0.299074	SPIKE	18	6	15	8	20	6	0.5		0.000367	0.000853	1.1056	1
1008	Gm15361		0.316972	0.128749	0.299074	NSPIKE	20	3.33	13.33	4	16	15	0.5		0.000357	0.000839	1.07647	1
1019	Gm16599		0.316972	0.128749	0.299074	NSPIKE	24	20	8	20	8	20	0.5		0.000357	0.000839	1.07647	1
1240	Gmip		0.31658	0.128749	0.299074	SPIKE	26	23.83	12.46	22	11.5	6.5	0.25		0.000363	0.000847	1.09296	1
1519	Klk1b26		0.316284	0.128789	0.299074	SPIKE	32	16	0	12	0	10.67	0.5		0.000367	0.000853	1.1056	1
1591	LOC118567721		0.316284	0.128789	0.299074	SPIKE	18	6	15	8	20	6	0.5		0.000367	0.000853	1.1056	1
1907	Nlrp5		0.31658	0.128749	0.299074	SPIKE	22	0	12.38	0	13.5	5.5	0.25		0.000363	0.000847	1.09296	1
1913	Noc3l		0.316342	0.128789	0.299074	SPIKE	35	5.83	21.15	4	14.5	8.75	0.75		0.000366	0.000853	1.10311	1
2053	Pelp1		0.316423	0.128789	0.299074	SPIKE	25	0	12.5	0	12	8.33	0.5		0.000365	0.000851	1.09964	1
2557	Slco1c1		0.317215	0.128749	0.299074	NSPIKE	18	11.62	1.5	15.5	2	13.5	0.75		0.000354	0.000834	1.06634	1
2638	Stard3		0.316972	0.128749	0.299074	NSPIKE	24	20	8	20	8	20	0.5		0.000357	0.000839	1.07647	1
2951	Uncx		0.31658	0.128749	0.299074	SPIKE	19	9.5	0	12	0	6.33	0.5		0.000363	0.000847	1.09296	1
2999	Wdcp		0.316557	0.128789	0.299074	SPIKE	19	7.92	16.23	10	20.5	4.75	0.75		0.000363	0.000847	1.09394	1
3058	Zcchc14		0.316972	0.128749	0.299074	NSPIKE	24	20	8	20	8	20	0.5		0.000357	0.000839	1.07647	1
3095	Zfp334		0.31658	0.128749	0.299074	SPIKE	26	2.17	13.54	2	12.5	6.5	0.75		0.000363	0.000847	1.09296	1
926	Foxo6		0.315576	0.131739	0.305039	SPIKE	19	15.83	7.52	20	9.5	4.75	0.25		0.000377	0.000873	1.13635	1
1666	Mapkap1		0.315717	0.131619	0.305039	SPIKE	28	0	14	0	12	7	0.5		0.000375	0.00087	1.13017	1
1956	Nxpe3		0.31573	0.131619	0.305039	NSPIKE	34	12.04	31.17	8.5	22	25.5	0.25		0.000375	0.00087	1.12963	1
2936	Uap1l1		0.315628	0.131739	0.305039	NSPIKE	28	19.25	7	16.5	6	21	0.25		0.000376	0.000872	1.13407	1
49	AB010352		0.314934	0.134329	0.308404	SPIKE	22	3.67	14.67	4	16	5.5	0.5		0.000387	0.000891	1.16494	1
67	Ablim2		0.315009	0.134329	0.308404	SPIKE	20	5	16.25	6	19.5	5	0.25		0.000386	0.00089	1.16156	1
255	Aurka		0.314851	0.134329	0.308404	NSPIKE	24	18.5	8	18.5	8	18	0.25		0.000388	0.000893	1.16869	1
762	Eefsec		0.315308	0.133739	0.308404	SPIKE	32	24	8	18	6	8	0.5		0.000381	0.000881	1.14823	1
1153	Gm40781		0.314744	0.134349	0.308404	SPIKE	20	5	16.25	6	19.5	5	0.25		0.00039	0.000894	1.17357	1
1736	Moap1		0.31478	0.134329	0.308404	NSPIKE	18	5.62	13.5	7.5	18	13.5	0.75		0.000389	0.000894	1.17192	1
1767	Mtfr1		0.314774	0.134329	0.308404	SPIKE	24	0	12	0	12	4	0.5		0.000389	0.000894	1.1722	1
2402	Sdsl		0.314982	0.134329	0.308404	NSPIKE	18	5.62	13.5	7.5	18	13.5	0.75		0.000386	0.00089	1.16281	1
2516	Slc30a6		0.3153	0.133739	0.308404	NSPIKE	24	18	6	18	6	16	0.5		0.000381	0.000881	1.1486	1
2756	Thumpd2		0.314757	0.134349	0.308404	SPIKE	20	5	16.25	6	19.5	5	0.25		0.000389	0.000894	1.17294	1
3098	Zfp35		0.315109	0.134329	0.308404	SPIKE	19	15.83	7.52	20	9.5	4.75	0.25		0.000384	0.000887	1.15709	1
3171	Zfp939		0.314934	0.134329	0.308404	SPIKE	23	1.92	13.42	2	14	5.75	0.5		0.000387	0.000891	1.16494	1
615	Cyb5d2		0.314089	0.136399	0.309997	SPIKE	32	24	8	18	6	8	0.5		0.000399	0.000909	1.20362	1
672	Ddx4		0.314627	0.135589	0.309997	SPIKE	18	6	16.12	8	21.5	4.5	0.25		0.000391	0.000897	1.17888	1
693	Disp3		0.31427	0.136399	0.309997	SPIKE	24	12	0	12	0	8	0.5		0.000397	0.000904	1.19524	1
1030	Gm2016		0.314485	0.135729	0.309997	SPIKE	18	0	9	0	12	3	0.5		0.000393	0.000899	1.18532	1
1373	Igf2		0.314056	0.136399	0.309997	SPIKE	18	0	9	0	12	3	0.5		0.0004	0.000909	1.20513	1
1617	Lrp12		0.314435	0.135779	0.309997	NSPIKE	24	20	8	20	8	20	0.5		0.000394	0.0009	1.18762	1
1732	Mmp16		0.314089	0.136399	0.309997	SPIKE	24	12	0	12	0	8	0.5		0.000399	0.000909	1.20362	1
2027	Pcnx2		0.314056	0.136399	0.309997	SPIKE	18	0	9	0	12	3	0.5		0.0004	0.000909	1.20513	1
2196	Psen2		0.31427	0.136399	0.309997	NSPIKE	18	11.62	1.5	15.5	2	13.5	0.75		0.000397	0.000904	1.19524	1
2344	Rpp40		0.314485	0.135729	0.309997	SPIKE	27	6.75	21.94	6	19.5	6.75	0.25		0.000393	0.000899	1.18532	1
2552	Slc9a9		0.3146	0.135589	0.309997	SPIKE	32	26.67	8.67	20	6.5	8	0.75		0.000392	0.000897	1.18011	1
2590	Snx29		0.3146	0.135589	0.309997	SPIKE	26	23.83	10.83	22	10	6.5	0.5		0.000392	0.000897	1.18011	1
3134	Zfp641		0.31427	0.136399	0.309997	SPIKE	24	14	0.5	14	0.5	6	0.75		0.000397	0.000904	1.19524	1
3196	Zswim8		0.314526	0.135589	0.309997	NSPIKE	18	11.62	1.5	15.5	2	13.5	0.75		0.000393	0.000899	1.18345	1
185	Apbb1ip		0.313506	0.138639	0.313973	SPIKE	20	5	13.75	6	16.5	5	0.75		0.000409	0.000925	1.23096	1
923	Foxk1		0.313552	0.138639	0.313973	ACOS	32	8	13.33	6	10	32	0.83		0.000408	0.000924	1.22879	1
1698	Meis3		0.313747	0.138419	0.313973	SPIKE	18	6	15	8	20	3	0.5		0.000405	0.000919	1.21957	1
2144	Pomgnt2		0.313607	0.138639	0.313973	NSPIKE	32	15.33	29.33	11.5	22	24	0.75		0.000407	0.000923	1.22619	1
2366	Rtp3		0.31367	0.138519	0.313973	ACOS	28	23.33	7	20	6	28	0.58		0.000406	0.000921	1.22319	1
194	Aqr		0.311961	0.142589	0.31713	SPIKE	30	25	11.88	20	9.5	7.5	0.25		0.000434	0.000966	1.30626	1
321	C8g		0.312601	0.142579	0.31713	SPIKE	18	6	16.12	8	21.5	4.5	0.25		0.000423	0.000951	1.27453	1
583	Crebzf		0.311961	0.142589	0.31713	NSPIKE	19	1.19	9.5	1.5	12	14.25	0.75		0.000434	0.000966	1.30626	1
708	Dnah7b		0.31283	0.141759	0.31713	SPIKE	18	7.5	15.38	10	20.5	4.5	0.75		0.000419	0.000947	1.2634	1
791	Entpd3		0.31174	0.142709	0.31713	SPIKE	19	7.92	17.42	10	22	6.33	0.5		0.000437	0.000972	1.31737	1
939	Fzd5		0.311805	0.142709	0.31713	SPIKE	24	4	14.5	4	14.5	6	0.75		0.000436	0.00097	1.3141	1
965	Gemin8		0.311961	0.142589	0.31713	NSPIKE	21	19.69	10.5	22.5	12	15.75	0.25		0.000434	0.000966	1.30626	1
1133	Gm35438		0.31283	0.141759	0.31713	SPIKE	35	2.92	20.42	2	14	8.75	0.5		0.000419	0.000947	1.2634	1
1367	Iffo1		0.312724	0.142579	0.31713	SPIKE	22	0	12.38	0	13.5	5.5	0.25		0.000421	0.000949	1.26854	1
1503	Kirrel		0.312601	0.142579	0.31713	SPIKE	18	0	7.88	0	10.5	4.5	0.75		0.000423	0.000951	1.27453	1
1703	Mettl16		0.312094	0.142589	0.31713	NSPIKE	24	8	20	8	20	18	0.5		0.000431	0.000966	1.29961	1
1884	Net1		0.312724	0.142579	0.31713	NSPIKE	25	17.19	6.25	16.5	6	18.75	0.25		0.000421	0.000949	1.26854	1
1928	Npy		0.312127	0.142579	0.31713	NSPIKE	21	20.56	8.75	23.5	10	15.75	0.75		0.000431	0.000965	1.29794	1
2188	Prox1		0.311952	0.142589	0.31713	SPIKE	29	24.17	11.48	20	9.5	7.25	0.25		0.000434	0.000966	1.30671	1
2234	Rab27a		0.31234	0.142579	0.31713	SPIKE	32	2.67	16.67	2	12.5	8	0.75		0.000427	0.000959	1.28741	1
2268	Rbm22		0.312017	0.142589	0.31713	SPIKE	24	2	12.5	2	12.5	6	0.75		0.000433	0.000966	1.30346	1
2330	Rnf207		0.31258	0.142579	0.31713	SPIKE	26	0	13	0	12	8.67	0.5		0.000423	0.000951	1.27558	1
2373	Rxfp1		0.312025	0.142589	0.31713	SPIKE	22	0	12.38	0	13.5	5.5	0.25		0.000432	0.000966	1.30304	1
2433	Sfrp2		0.312601	0.142579	0.31713	SPIKE	18	13.5	5.62	18	7.5	4.5	0.25		0.000423	0.000951	1.27453	1
2456	Shisa7		0.312577	0.142579	0.31713	SPIKE	27	0	11.81	0	10.5	6.75	0.75		0.000423	0.000951	1.27573	1
2616	Spon2		0.312729	0.142579	0.31713	SPIKE	30	5	20	4	16	7.5	0.5		0.000421	0.000949	1.26829	1
2686	Taf4		0.311805	0.142709	0.31713	SPIKE	24	0	13.5	0	13.5	6	0.25		0.000436	0.00097	1.3141	1
2753	Them7		0.31283	0.141759	0.31713	SPIKE	32	24	10	18	7.5	8	0.25		0.000419	0.000947	1.2634	1
2796	Tmem253		0.31283	0.141759	0.31713	SPIKE	19	15.83	7.52	20	9.5	4.75	0.25		0.000419	0.000947	1.2634	1
2852	Trim46		0.312259	0.142579	0.31713	SPIKE	22	0	12.38	0	13.5	5.5	0.25		0.000429	0.000961	1.2914	1
2902	Ttc16		0.312025	0.142589	0.31713	SPIKE	30	25	11.88	20	9.5	7.5	0.25		0.000432	0.000966	1.30304	1
2943	Uhrf1		0.312025	0.142589	0.31713	SPIKE	26	23.83	12.46	22	11.5	6.5	0.25		0.000432	0.000966	1.30304	1
635	D2hgdh		0.311581	0.144659	0.320351	ACOS	34	11.33	17	8	12	34	0.83		0.00044	0.000974	1.32541	1
1396	Il7		0.311574	0.144659	0.320351	SPIKE	18	9	16.88	12	22.5	4.5	0.75		0.00044	0.000974	1.32579	1
2038	Pdgfb		0.311627	0.144659	0.320351	SPIKE	27	9	24.19	8	21.5	6.75	0.25		0.000439	0.000974	1.32306	1
2732	Tet2		0.311643	0.144659	0.320351	NSPIKE	21	19.69	10.5	22.5	12	15.75	0.25		0.000439	0.000974	1.32229	1
3117	Zfp516		0.311588	0.144659	0.320351	SPIKE	20	10	0	12	0	5	0.5		0.00044	0.000974	1.32503	1
945	Gal3st1		0.311478	0.147299	0.325972	SPIKE	25	0	10.94	0	10.5	6.25	0.75		0.000442	0.000977	1.33065	1
90	Acsm5		0.310052	0.149978	0.327462	SPIKE	24	0	12	0	12	4	0.5		0.000466	0.00102078	1.40518	1
291	Blm		0.309965	0.150018	0.327462	SPIKE	32	24	8	18	6	8	0.5		0.000468	0.00102138	1.40984	1
340	Camsap3		0.311047	0.148949	0.327462	SPIKE	18	0	9	0	12	3	0.5		0.000449	0.000991	1.35279	1
553	Cntnap5b		0.309965	0.150018	0.327462	SPIKE	32	16	0	12	0	8	0.5		0.000468	0.00102138	1.40984	1
594	Crybg1		0.309965	0.150018	0.327462	SPIKE	32	16	0	12	0	8	0.5		0.000468	0.00102138	1.40984	1
636	D7Ertd443e		0.310118	0.149978	0.327462	SPIKE	32	24	8	18	6	8	0.5		0.000465	0.00101963	1.40167	1
832	Fam107b		0.310692	0.149849	0.327462	SPIKE	19	15.83	7.52	20	9.5	4.75	0.25		0.000455	0.00100084	1.37129	1
966	Gfap		0.311094	0.148739	0.327462	SPIKE	24	0	12	0	12	4	0.5		0.000448	0.00099	1.35033	1
1435	Itprid2		0.311173	0.148669	0.327462	SPIKE	18	12	1.88	16	2.5	4.5	0.75		0.000447	0.000988	1.34626	1
1869	Ndst3		0.310226	0.149849	0.327462	SPIKE	25	0	12.5	0	12	6.25	0.5		0.000463	0.00101612	1.39589	1
1967	Odf2l		0.310881	0.148949	0.327462	SPIKE	18	6	16.12	8	21.5	4.5	0.25		0.000452	0.000996	1.36139	1
2122	Plod2		0.311047	0.148949	0.327462	SPIKE	24	10	23.5	10	23.5	6	0.25		0.000449	0.000991	1.35279	1
2206	Ptgs1		0.310226	0.149849	0.327462	SPIKE	28	23.33	11.08	20	9.5	7	0.25		0.000463	0.00101612	1.39589	1
2219	Purg		0.310052	0.149978	0.327462	SPIKE	24	2	12.5	2	12.5	6	0.75		0.000466	0.00102078	1.40518	1
2224	Pwwp2a		0.310283	0.149849	0.327462	NSPIKE	24	20	8	20	8	20	0.5		0.000462	0.00101529	1.39283	1
2463	Sidt1		0.309965	0.150018	0.327462	SPIKE	32	24	8	18	6	8	0.5		0.000468	0.00102138	1.40984	1
2585	Snip1		0.310677	0.149849	0.327462	NSPIKE	32	16	0	12	0	21.33	0.5		0.000455	0.00100084	1.37207	1
2728	Tepp		0.310692	0.149849	0.327462	SPIKE	23	3.83	15.33	4	16	3.83	0.5		0.000455	0.00100084	1.37129	1
2739	Tfap4		0.310692	0.149849	0.327462	SPIKE	18	12	1.88	16	2.5	4.5	0.75		0.000455	0.00100084	1.37129	1
2817	Tns2		0.310881	0.148949	0.327462	SPIKE	33	30.25	11.69	22	8.5	8.25	0.75		0.000452	0.000996	1.36139	1
494	Cfap97		0.309584	0.150678	0.328008	NSPIKE	24	20.5	10	20.5	10	18	0.25		0.000475	0.00103307	1.43046	1
1438	Izumo4		0.309825	0.150488	0.328008	SPIKE	18	0	9	0	12	3	0.5		0.00047	0.00102544	1.41738	1
1631	Lrriq1		0.309653	0.150678	0.328008	SPIKE	18	0	9	0	12	3	0.5		0.000474	0.00103148	1.4267	1
3076	Zfp131		0.30984	0.150488	0.328008	SPIKE	23	1.92	13.42	2	14	7.67	0.5		0.00047	0.00102544	1.41661	1
1004	Gm14114		0.309524	0.151988	0.329738	SPIKE	20	6.67	15.42	8	18.5	5	0.75		0.000476	0.00103307	1.43376	1
1345	Hook1		0.30947	0.151988	0.329738	NSPIKE	28	19.25	7	16.5	6	21	0.25		0.000477	0.0010345	1.43672	1
1577	LOC100861749		0.309524	0.151988	0.329738	SPIKE	28	0	14	0	12	7	0.5		0.000476	0.00103307	1.43376	1
2972	Vav2		0.309524	0.151988	0.329738	SPIKE	20	6.67	15.42	8	18.5	5	0.75		0.000476	0.00103307	1.43376	1
3087	Zfp275		0.30957	0.151988	0.329738	SPIKE	18	0	9	0	12	3	0.5		0.000475	0.00103307	1.43126	1
577	Cplane2		0.309446	0.152118	0.329796	SPIKE	32	8	24	6	18	10.67	0.5		0.000477	0.00103472	1.43799	1
399	Ccna1		0.308658	0.155188	0.333963	SPIKE	24	12	0	12	0	8	0.5		0.000492	0.00105905	1.48178	1
480	Cep95		0.30932	0.155188	0.333963	SPIKE	19	7.92	16.23	10	20.5	4.75	0.75		0.00048	0.00103829	1.44491	1
860	Farp1		0.309211	0.155188	0.333963	SPIKE	24	0	12	0	12	4	0.5		0.000482	0.0010419	1.45092	1
1405	Inpp5a		0.309408	0.154348	0.333963	ACOS	24	14	10	14	10	24	0.17		0.000478	0.00103553	1.4401	1
1410	Ints6l		0.30879	0.155188	0.333963	SPIKE	27	0	11.81	0	10.5	6.75	0.75		0.000489	0.00105728	1.47433	1
1646	Lyst		0.308662	0.155188	0.333963	SPIKE	26	23.83	10.83	22	10	6.5	0.5		0.000492	0.00105905	1.48155	1
1683	Mcph1		0.308658	0.155188	0.333963	SPIKE	24	14	0.5	14	0.5	6	0.75		0.000492	0.00105905	1.48178	1
2000	P4ha2		0.308519	0.155188	0.333963	NSPIKE	24	18	6	18	6	16	0.5		0.000494	0.00106393	1.48961	1
2032	Pdcl2		0.308658	0.155188	0.333963	SPIKE	18	6	15	8	20	3	0.5		0.000492	0.00105905	1.48178	1
2671	Syngap1		0.308866	0.155188	0.333963	ACOS	18	6	1.5	8	2	18	0.25		0.000488	0.00105494	1.47008	1
3028	Xlr4a		0.308658	0.155188	0.333963	SPIKE	32	24	8	18	6	8	0.5		0.000492	0.00105905	1.48178	1
310	C1s1		0.308229	0.158348	0.338713	SPIKE	32	24	10	18	7.5	8	0.25		0.0005	0.00107065	1.50608	1
1261	Gpr34		0.308293	0.158288	0.338713	SPIKE	27	0	11.81	0	10.5	6.75	0.75		0.000499	0.00107021	1.50243	1
1299	Gys1		0.308229	0.158348	0.338713	SPIKE	32	24	10	18	7.5	8	0.25		0.0005	0.00107065	1.50608	1
1544	Lbr		0.308322	0.158178	0.338713	SPIKE	32	0	16	0	12	8	0.5		0.000498	0.00107021	1.5008	1
2123	Plpbp		0.307722	0.158348	0.338713	SPIKE	18	7.5	15.38	10	20.5	4.5	0.75		0.00051	0.00108997	1.53531	1
2199	Psmc3ip		0.307819	0.158348	0.338713	SPIKE	25	0	10.94	0	10.5	6.25	0.75		0.000508	0.00108673	1.52973	1
2508	Slc26a6		0.308301	0.158288	0.338713	NSPIKE	20	0	10	0	12	15	0.5		0.000499	0.00107021	1.50199	1
2708	Tcf19		0.308229	0.158348	0.338713	SPIKE	18	12	1.88	16	2.5	4.5	0.75		0.0005	0.00107065	1.50608	1
2945	Ulk3		0.308301	0.158288	0.338713	NSPIKE	20	0	10	0	12	15	0.5		0.000499	0.00107021	1.50199	1
9	1700123O20Rik		0.307579	0.159938	0.34106	NSPIKE	35	14.58	32.08	10	22	29.17	0.5		0.000512	0.00109519	1.5437	1
1183	Gm4918		0.307514	0.159978	0.34106	SPIKE	25	0	12.5	0	12	6.25	0.5		0.000514	0.00109715	1.54748	1
1684	Mctp1		0.307418	0.159978	0.34106	SPIKE	21	3.5	12.69	4	14.5	5.25	0.75		0.000515	0.00109895	1.55313	1
1809	Myom2		0.30747	0.159978	0.34106	SPIKE	21	3.5	12.69	4	14.5	5.25	0.75		0.000514	0.00109751	1.55006	1
2416	Septin1		0.30747	0.159978	0.34106	SPIKE	26	23.83	12.46	22	11.5	6.5	0.25		0.000514	0.00109751	1.55006	1
856	Fance		0.307212	0.160918	0.342152	SPIKE	18	12	1.88	16	2.5	4.5	0.75		0.00052	0.00110534	1.56528	1
933	Fryl		0.307212	0.160918	0.342152	SPIKE	27	0	11.81	0	10.5	6.75	0.75		0.00052	0.00110534	1.56528	1
1104	Gm30439		0.307158	0.160918	0.342152	SPIKE	19	7.92	16.23	10	20.5	4.75	0.75		0.000521	0.00110587	1.56846	1
2427	Serpinb9		0.307212	0.160918	0.342152	SPIKE	24	16	2.5	16	2.5	6	0.75		0.00052	0.00110534	1.56528	1
1	0610040J01Rik		0.306783	0.163588	0.34375	SPIKE	35	0	19.69	0	13.5	8.75	0.25		0.000528	0.00111376	1.59084	1
39	9130002K18Rik		0.30703	0.162938	0.34375	NSPIKE	18	3	12	4	16	13.5	0.5		0.000523	0.00110709	1.5761	1
88	Acsl1		0.307129	0.162938	0.34375	SPIKE	21	3.5	12.69	4	14.5	5.25	0.75		0.000521	0.00110587	1.5702	1
187	Apc2		0.306224	0.163818	0.34375	NSPIKE	18	12	3	16	4	13.5	0.5		0.000539	0.00113233	1.62483	1
297	Brca2		0.307135	0.162938	0.34375	SPIKE	25	0	10.94	0	10.5	6.25	0.75		0.000521	0.00110587	1.56981	1
301	Brpf1		0.307135	0.162938	0.34375	SPIKE	18	10.5	1.5	14	2	4.5	0.5		0.000521	0.00110587	1.56981	1
1463	Kcnj3		0.306347	0.163818	0.34375	SPIKE	24	2	12.5	2	12.5	6	0.75		0.000537	0.00112968	1.61731	1
1484	Kctd3		0.306224	0.163818	0.34375	NSPIKE	29	19.33	4.83	16	4	24.17	0.5		0.000539	0.00113233	1.62483	1
1633	Lrrtm1		0.306338	0.163818	0.34375	SPIKE	34	28.33	9.21	20	6.5	8.5	0.75		0.000537	0.00112968	1.61783	1
1782	Mxra7		0.30706	0.162938	0.34375	SPIKE	25	6.25	17.19	6	16.5	6.25	0.75		0.000522	0.00110654	1.57427	1
1804	Myo1c		0.30706	0.162938	0.34375	SPIKE	30	25	11.88	20	9.5	7.5	0.25		0.000522	0.00110654	1.57427	1
1910	Nmi		0.306962	0.162938	0.34375	NSPIKE	20	0	10	0	12	15	0.5		0.000524	0.00110918	1.58012	1
1976	Opn3		0.306783	0.163588	0.34375	SPIKE	21	3.5	14	4	16	5.25	0.5		0.000528	0.00111376	1.59084	1
2261	Rb1		0.306224	0.163818	0.34375	NSPIKE	18	6.38	16.5	8.5	22	13.5	0.25		0.000539	0.00113233	1.62483	1
2281	Rec114		0.306584	0.163818	0.34375	ACOS	24	2	6	2	6	24	0.83		0.000532	0.00112146	1.60289	1
2432	Sfpq		0.306413	0.163818	0.34375	SPIKE	35	0	19.69	0	13.5	8.75	0.25		0.000535	0.00112797	1.61326	1
2564	Slx4		0.306783	0.163588	0.34375	SPIKE	35	0	19.69	0	13.5	8.75	0.25		0.000528	0.00111376	1.59084	1
2680	Tab1		0.30706	0.162938	0.34375	SPIKE	28	25.67	11.67	22	10	9.33	0.5		0.000522	0.00110654	1.57427	1
2777	Tmem120b		0.306195	0.163818	0.34375	SPIKE	22	3.67	13.29	4	14.5	5.5	0.75		0.00054	0.00113283	1.6266	1
2856	Trim59		0.306786	0.163548	0.34375	SPIKE	18	0	9	0	12	3	0.5		0.000528	0.00111376	1.59069	1
468	Cep128		0.30608	0.164848	0.345458	ACOS	28	11.67	7	10	6	28	0.17		0.000542	0.00113698	1.63364	1
2310	Ric8a		0.305976	0.164848	0.345458	SPIKE	18	9	16.88	12	22.5	4.5	0.75		0.000544	0.00114071	1.64007	1
2298	Rgl3		0.30575	0.165078	0.345714	SPIKE	18	16.5	7.5	22	10	6	0.5		0.000549	0.00114973	1.65413	1
921	Foxa1		0.305505	0.166258	0.34773	NSPIKE	28	15.75	0	13.5	0	21	0.75		0.000554	0.00115886	1.66944	1
2540	Slc5a6		0.305663	0.166258	0.34773	SPIKE	28	11.67	25.67	10	22	9.33	0.5		0.000551	0.00115276	1.65957	1
1751	Mpp7		0.305441	0.166768	0.348569	SPIKE	20	6.67	15.42	8	18.5	5	0.75		0.000555	0.00116088	1.67345	1
2009	Pard3		0.305392	0.167528	0.349929	NSPIKE	18	5.62	13.5	7.5	18	13.5	0.75		0.000556	0.0011623	1.67659	1
254	AU041133		0.305083	0.169448	0.35022	SPIKE	31	25.83	8.4	20	6.5	7.75	0.75		0.000563	0.00116749	1.69617	1
271	Bbox1		0.305234	0.169448	0.35022	NSPIKE	20	3.33	13.33	4	16	15	0.5		0.00056	0.00116466	1.68657	1
427	Cdc42ep3		0.304923	0.169448	0.35022	SPIKE	18	0	7.88	0	10.5	4.5	0.75		0.000566	0.00117151	1.70643	1
467	Cep120		0.305234	0.169448	0.35022	NSPIKE	24	20	8	20	8	20	0.5		0.00056	0.00116466	1.68657	1
654	Dchs1		0.304923	0.169448	0.35022	NSPIKE	29	16.92	2.42	14	2	24.17	0.5		0.000566	0.00117151	1.70643	1
663	Dcun1d5		0.304875	0.169528	0.35022	NSPIKE	32	2.67	18.67	2	14	26.67	0.5		0.000567	0.00117211	1.70949	1
1333	Hipk4		0.305234	0.169448	0.35022	NSPIKE	24	20	8	20	8	20	0.5		0.00056	0.00116466	1.68657	1
1408	Inpp5e		0.305083	0.169448	0.35022	SPIKE	18	0	9	0	12	3	0.5		0.000563	0.00116749	1.69617	1
1680	Mcf2		0.305234	0.169448	0.35022	NSPIKE	24	20	8	20	8	20	0.5		0.00056	0.00116466	1.68657	1
1707	Mfap3l		0.304875	0.169528	0.35022	NSPIKE	34	14.17	31.17	10	22	28.33	0.5		0.000567	0.00117211	1.70949	1
2006	Papln		0.305136	0.169448	0.35022	NSPIKE	28	19.25	7	16.5	6	21	0.25		0.000562	0.00116745	1.69281	1
2056	Perm1		0.305136	0.169448	0.35022	SPIKE	18	6	15	8	20	3	0.5		0.000562	0.00116745	1.69281	1
2382	Samd10		0.304995	0.169448	0.35022	SPIKE	24	14	0.5	14	0.5	6	0.75		0.000565	0.00116983	1.70176	1
2694	Tapbpl		0.305234	0.169448	0.35022	NSPIKE	30	28.12	15	22.5	12	22.5	0.25		0.00056	0.00116466	1.68657	1
2944	Uhrf2		0.305234	0.169448	0.35022	NSPIKE	24	20	8	20	8	20	0.5		0.00056	0.00116466	1.68657	1
3020	Wrn		0.305083	0.169448	0.35022	SPIKE	18	0	9	0	12	3	0.5		0.000563	0.00116749	1.69617	1
3156	Zfp78		0.304995	0.169448	0.35022	SPIKE	19	6.33	15.83	8	20	3.17	0.5		0.000565	0.00116983	1.70176	1
288	Bik		0.304812	0.171668	0.351914	SPIKE	22	0	12.38	0	13.5	5.5	0.25		0.000569	0.00117335	1.71352	1
435	Cdh5		0.304604	0.171668	0.351914	NSPIKE	32	16.67	2.67	12.5	2	24	0.25		0.000573	0.00117651	1.72699	1
760	Edn1		0.304604	0.171668	0.351914	NSPIKE	21	16.19	7	18.5	8	15.75	0.25		0.000573	0.00117651	1.72699	1
1179	Gm4864		0.304762	0.171668	0.351914	SPIKE	20	6.67	15.42	8	18.5	5	0.75		0.00057	0.00117482	1.71677	1
1287	Gsg1l		0.304571	0.171668	0.351914	SPIKE	25	0	12.5	0	12	6.25	0.5		0.000574	0.00117717	1.72911	1
1505	Kiss1r		0.304664	0.171668	0.351914	SPIKE	18	0	7.88	0	10.5	4.5	0.75		0.000572	0.00117651	1.72312	1
2469	Simc1		0.304605	0.171668	0.351914	SPIKE	18	6	16.12	8	21.5	4.5	0.25		0.000573	0.00117651	1.72691	1
2511	Slc29a4		0.304629	0.171668	0.351914	SPIKE	35	0	19.69	0	13.5	8.75	0.25		0.000573	0.00117651	1.72538	1
2574	Smkr-ps		0.304604	0.171668	0.351914	NSPIKE	32	14	0	10.5	0	24	0.25		0.000573	0.00117651	1.72699	1
3099	Zfp354a		0.304664	0.171668	0.351914	SPIKE	18	7.5	15.38	10	20.5	4.5	0.75		0.000572	0.00117651	1.72312	1
3133	Zfp629		0.304851	0.171668	0.351914	SPIKE	31	25.83	8.4	20	6.5	7.75	0.75		0.000568	0.00117242	1.71105	1
3183	Zic4		0.304555	0.171668	0.351914	ACOS	31	2.58	2.58	2	2	31	0		0.000574	0.00117717	1.73018	1
201	Arhgap27		0.303629	0.175288	0.352997	SPIKE	18	12	1.88	16	2.5	4.5	0.75		0.000595	0.00121142	1.79132	1
272	Bbs1		0.30339	0.176168	0.352997	SPIKE	30	0	13.12	0	10.5	7.5	0.75		0.0006	0.00121724	1.80742	1
499	Cgnl1		0.30339	0.176168	0.352997	SPIKE	24	16	2.5	16	2.5	6	0.75		0.0006	0.00121724	1.80742	1
644	Dapk3		0.302875	0.176388	0.352997	SPIKE	18	6	16.12	8	21.5	4.5	0.25		0.000612	0.00122595	1.84254	1
647	Dbt		0.303046	0.176388	0.352997	SPIKE	19	6.33	15.83	8	20	3.17	0.5		0.000608	0.00122595	1.83084	1
877	Fbxo31		0.303046	0.176388	0.352997	NSPIKE	28	19.25	7	16.5	6	21	0.25		0.000608	0.00122595	1.83084	1
988	Gm10479		0.302677	0.176388	0.352997	ACOS	18	1.5	1.5	2	2	18	0		0.000616	0.00123294	1.85626	1
1317	Hdac9		0.302862	0.176388	0.352997	NSPIKE	18	3	12	4	16	13.5	0.5		0.000612	0.00122595	1.84343	1
1476	Kcns3		0.303629	0.175288	0.352997	SPIKE	18	12	1.88	16	2.5	4.5	0.75		0.000595	0.00121142	1.79132	1
1488	Kdm4b		0.302743	0.176388	0.352997	SPIKE	20	8.33	17.08	10	20.5	5	0.75		0.000615	0.00123068	1.85171	1
1576	Lmx1b		0.303629	0.175288	0.352997	SPIKE	18	7.5	15.38	10	20.5	4.5	0.75		0.000595	0.00121142	1.79132	1
1592	LOC118567768		0.302915	0.176388	0.352997	SPIKE	22	3.67	14.67	4	16	5.5	0.5		0.000611	0.00122595	1.83982	1
1606	Lpp		0.303046	0.176388	0.352997	SPIKE	24	10	23.5	10	23.5	6	0.25		0.000608	0.00122595	1.83084	1
1626	Lrrc38		0.303629	0.175288	0.352997	SPIKE	32	26.67	8.67	20	6.5	8	0.75		0.000595	0.00121142	1.79132	1
1799	Mylk		0.302875	0.176388	0.352997	SPIKE	35	0	19.69	0	13.5	8.75	0.25		0.000612	0.00122595	1.84254	1
1802	Myo19		0.302915	0.176388	0.352997	SPIKE	22	3.67	14.67	4	16	5.5	0.5		0.000611	0.00122595	1.83982	1
1941	Nsun6		0.303544	0.175288	0.352997	NSPIKE	24	20	8	20	8	20	0.5		0.000596	0.00121411	1.79704	1
1944	Nt5dc3		0.302915	0.176388	0.352997	SPIKE	22	3.67	13.29	4	14.5	5.5	0.75		0.000611	0.00122595	1.83982	1
1988	Otud3		0.302875	0.176388	0.352997	SPIKE	26	23.83	10.83	22	10	6.5	0.5		0.000612	0.00122595	1.84254	1
1998	P3h3		0.302915	0.176388	0.352997	SPIKE	26	2.17	15.17	2	14	6.5	0.5		0.000611	0.00122595	1.83982	1
2014	Patl1		0.30362	0.175288	0.352997	SPIKE	21	0	9.19	0	10.5	5.25	0.75		0.000595	0.00121142	1.79192	1
2067	Phactr4		0.303221	0.176278	0.352997	SPIKE	19	7.92	16.23	10	20.5	4.75	0.75		0.000604	0.0012242	1.81891	1
2149	Ppard		0.303454	0.175288	0.352997	SPIKE	24	2	12.5	2	12.5	6	0.75		0.000598	0.00121662	1.80306	1
2180	Prkdc		0.303046	0.176388	0.352997	NSPIKE	28	19.25	7	16.5	6	21	0.25		0.000608	0.00122595	1.83084	1
2255	Rasa4		0.303046	0.176388	0.352997	SPIKE	32	24	8	18	6	8	0.5		0.000608	0.00122595	1.83084	1
2275	Rbpms		0.303046	0.176388	0.352997	NSPIKE	28	19.25	7	16.5	6	21	0.25		0.000608	0.00122595	1.83084	1
2287	Relb		0.303629	0.175288	0.352997	SPIKE	18	12	1.88	16	2.5	4.5	0.75		0.000595	0.00121142	1.79132	1
2300	Rgs14		0.302915	0.176388	0.352997	SPIKE	29	12.08	26.58	10	22	9.67	0.5		0.000611	0.00122595	1.83982	1
2512	Slc2a5		0.303945	0.172488	0.352997	ACOS	20	6.67	11.67	8	14	20	0.75		0.000588	0.00120364	1.77022	1
2536	Slc4a11		0.303629	0.175288	0.352997	SPIKE	34	28.33	9.21	20	6.5	8.5	0.75		0.000595	0.00121142	1.79132	1
2586	Sntg2		0.303629	0.175288	0.352997	SPIKE	18	0	7.88	0	10.5	4.5	0.75		0.000595	0.00121142	1.79132	1
2614	Spice1		0.302915	0.176388	0.352997	SPIKE	29	24.17	9.67	20	8	9.67	0.5		0.000611	0.00122595	1.83982	1
2876	Trpc1		0.303148	0.176278	0.352997	SPIKE	30	27.5	12.5	22	10	7.5	0.5		0.000605	0.00122595	1.82385	1
2900	Ttc13		0.303454	0.175288	0.352997	SPIKE	24	0	12	0	12	4	0.5		0.000598	0.00121662	1.80306	1
3023	Wwc2		0.303805	0.173998	0.352997	ACOS	20	6.67	10	8	12	20	0.83		0.000591	0.00120922	1.77956	1
3126	Zfp583		0.302875	0.176388	0.352997	SPIKE	26	23.83	10.83	22	10	6.5	0.5		0.000612	0.00122595	1.84254	1
3129	Zfp618		0.303394	0.176168	0.352997	SPIKE	25	0	10.94	0	10.5	6.25	0.75		0.0006	0.00121724	1.80714	1
3178	Zfp994		0.303148	0.176278	0.352997	SPIKE	23	3.83	15.33	4	16	7.67	0.5		0.000605	0.00122595	1.82385	1
441	Cdk15		0.302585	0.178928	0.357187	SPIKE	32	8	24	6	18	5.33	0.5		0.000618	0.00123408	1.86263	1
765	Efhc2		0.302585	0.178928	0.357187	SPIKE	32	16	0	12	0	8	0.5		0.000618	0.00123408	1.86263	1
843	Fam185a		0.302585	0.178928	0.357187	SPIKE	32	8	24	6	18	5.33	0.5		0.000618	0.00123408	1.86263	1
958	Gcnt2		0.302585	0.178928	0.357187	SPIKE	24	12	0	12	0	8	0.5		0.000618	0.00123408	1.86263	1
115	Adcy8		0.302506	0.179448	0.357778	ACOS	27	0	6.75	0	6	27	0.75		0.00062	0.00123621	1.86817	1
3014	Whrn		0.302525	0.179448	0.357778	SPIKE	18	0	9	0	12	3	0.5		0.00062	0.00123608	1.86681	1
936	Fut10		0.302294	0.179708	0.357851	ACOS	33	27.5	2.75	20	2	33	0.75		0.000625	0.00124447	1.883	1
2631	St6galnac3		0.302351	0.179708	0.357851	SPIKE	32	24	8	18	6	8	0.5		0.000624	0.00124259	1.87898	1
1724	Mir670hg		0.302113	0.181548	0.360841	SPIKE	30	15	28.12	12	22.5	7.5	0.75		0.000629	0.00125209	1.8957	1
1752	Mppe1		0.302096	0.181548	0.360841	NSPIKE	27	19.69	4.5	17.5	4	20.25	0.75		0.00063	0.00125211	1.89691	1
3109	Zfp438		0.301976	0.181548	0.360841	NSPIKE	28	21	7	18	6	18.67	0.5		0.000632	0.00125639	1.90546	1
94	Actn2		0.301822	0.183128	0.361066	SPIKE	29	12.08	24.77	10	20.5	7.25	0.75		0.000636	0.00125639	1.9164	1
400	Ccnd3-ps		0.301838	0.183128	0.361066	SPIKE	25	0	10.94	0	10.5	6.25	0.75		0.000636	0.00125639	1.91526	1
1158	Gm41393		0.301822	0.183128	0.361066	SPIKE	19	15.83	7.52	20	9.5	4.75	0.25		0.000636	0.00125639	1.9164	1
1255	Gpr137b-ps		0.301692	0.183128	0.361066	SPIKE	32	0	14	0	10.5	8	0.75		0.000639	0.00126017	1.92574	1
1277	Grin2c		0.301822	0.183128	0.361066	SPIKE	18	10.5	1.5	14	2	4.5	0.5		0.000636	0.00125639	1.9164	1
1372	Igdcc3		0.301822	0.183128	0.361066	SPIKE	22	14.67	2.29	16	2.5	5.5	0.75		0.000636	0.00125639	1.9164	1
1434	Itprid1		0.301822	0.183128	0.361066	SPIKE	18	10.5	1.5	14	2	4.5	0.5		0.000636	0.00125639	1.9164	1
1542	Layn		0.301822	0.183128	0.361066	SPIKE	24	12	1.5	12	1.5	6	0.25		0.000636	0.00125639	1.9164	1
1556	Lgals9		0.301692	0.183128	0.361066	SPIKE	22	5.5	15.12	6	16.5	5.5	0.75		0.000639	0.00126017	1.92574	1
1569	Lipe		0.301698	0.183128	0.361066	ACOS	24	2	8	2	8	24	0.75		0.000639	0.00126017	1.92529	1
1931	Npy5r		0.301822	0.183128	0.361066	SPIKE	21	0	9.19	0	10.5	5.25	0.75		0.000636	0.00125639	1.9164	1
2603	Spata1		0.301822	0.183128	0.361066	SPIKE	24	12	1.5	12	1.5	6	0.25		0.000636	0.00125639	1.9164	1
3011	Wfdc2		0.301822	0.183128	0.361066	SPIKE	19	15.83	7.52	20	9.5	4.75	0.25		0.000636	0.00125639	1.9164	1
57	Abcb9		0.301268	0.185178	0.36421	SPIKE	32	24	8	18	6	10.67	0.5		0.000649	0.00127704	1.95632	1
756	Ebf2		0.301382	0.185068	0.36421	SPIKE	24	10	23.5	10	23.5	6	0.25		0.000647	0.00127378	1.94808	1
2514	Slc30a3		0.30137	0.185068	0.36421	SPIKE	24	0	12	0	12	4	0.5		0.000647	0.00127378	1.94894	1
3176	Zfp955a		0.301326	0.185178	0.36421	SPIKE	20	5	15	6	18	6.67	0.5		0.000648	0.00127508	1.95213	1
193	Aptx		0.300326	0.186198	0.364871	ACOS	24	8	8	8	8	24	0		0.000672	0.00131768	2.02602	1
298	Brd3os		0.300597	0.186168	0.364871	SPIKE	30	10	23.12	8	18.5	7.5	0.75		0.000666	0.00130612	2.00579	1
767	Efna1		0.300597	0.186168	0.364871	SPIKE	24	12	0	12	0	8	0.5		0.000666	0.00130612	2.00579	1
1507	Klc3		0.300729	0.185758	0.364871	SPIKE	23	1.92	13.42	2	14	5.75	0.5		0.000662	0.00130129	1.99592	1
2273	Rbm5		0.301033	0.185668	0.364871	NSPIKE	23	7.67	19.17	8	20	15.33	0.5		0.000655	0.00128745	1.97349	1
3025	Xkr4		0.300546	0.186168	0.364871	SPIKE	24	16	2.5	16	2.5	6	0.75		0.000667	0.00130778	2.00957	1
507	Chrm2		0.300232	0.188888	0.369012	SPIKE	19	6.33	15.83	8	20	3.17	0.5		0.000675	0.00132068	2.03313	1
557	Col11a2		0.300101	0.188888	0.369012	SPIKE	19	7.92	16.23	10	20.5	4.75	0.75		0.000678	0.00132466	2.04299	1
1204	Gm6546		0.300157	0.188888	0.369012	NSPIKE	22	18.79	9.17	20.5	10	16.5	0.25		0.000677	0.00132353	2.03876	1
3033	Xpa		0.300127	0.188888	0.369012	SPIKE	18	6	15	8	20	6	0.5		0.000677	0.0013242	2.04103	1
3167	Zfp90		0.300277	0.188888	0.369012	SPIKE	20	5	13.75	6	16.5	5	0.75		0.000674	0.00131925	2.02969	1
641	Dagla		0.299813	0.190238	0.370519	NSPIKE	28	19.25	7	16.5	6	21	0.25		0.000685	0.00133727	2.06496	1
1121	Gm33649		0.299644	0.190238	0.370519	SPIKE	35	2.92	20.42	2	14	8.75	0.5		0.00069	0.00134387	2.07787	1
1159	Gm41467		0.29963	0.190238	0.370519	NSPIKE	26	15.71	4.33	14.5	4	19.5	0.25		0.00069	0.00134387	2.07896	1
1641	Ltc4s		0.299945	0.190238	0.370519	SPIKE	24	10	20.5	10	20.5	6	0.75		0.000682	0.00133153	2.05484	1
1893	Nfatc3		0.299644	0.190238	0.370519	SPIKE	23	5.75	15.81	6	16.5	5.75	0.75		0.00069	0.00134387	2.07787	1
253	AU040320		0.299203	0.192008	0.372379	SPIKE	32	8	24	6	18	10.67	0.5		0.000701	0.00136032	2.11208	1
455	Cecr2		0.299382	0.191748	0.372379	SPIKE	19	7.92	16.23	10	20.5	4.75	0.75		0.000696	0.00135299	2.09815	1
1995	P2rx4		0.299449	0.191748	0.372379	SPIKE	32	8	24	6	18	10.67	0.5		0.000695	0.00135212	2.09298	1
2035	Pde5a		0.299382	0.191748	0.372379	SPIKE	18	15	7.12	20	9.5	4.5	0.25		0.000696	0.00135299	2.09815	1
2164	Ppp1r42		0.299382	0.191748	0.372379	SPIKE	33	22	7.56	16	5.5	8.25	0.25		0.000696	0.00135299	2.09815	1
2772	Tmcc1		0.29922	0.191868	0.372379	NSPIKE	27	4.5	18	4	16	22.5	0.5		0.000701	0.00136029	2.11075	1
2905	Ttc27		0.299138	0.192008	0.372379	SPIKE	24	2	12.5	2	12.5	6	0.75		0.000703	0.00136275	2.11714	1
609	Cwc22		0.298264	0.195308	0.375367	NSPIKE	28	19.25	7	16.5	6	21	0.25		0.000726	0.00139563	2.18661	1
941	G2e3		0.29892	0.195298	0.375367	ACOS	28	11.67	7	10	6	28	0.17		0.000708	0.00137128	2.13427	1
967	Gfra4		0.299073	0.195038	0.375367	SPIKE	18	0	9	0	12	3	0.5		0.000704	0.00136521	2.12225	1
1216	Gm8010		0.298425	0.195308	0.375367	SPIKE	19	15.83	7.52	20	9.5	4.75	0.25		0.000721	0.00138906	2.17371	1
1478	Kcnt2		0.29836	0.195308	0.375367	SPIKE	22	3.67	14.67	4	16	5.5	0.5		0.000723	0.00139155	2.17891	1
1528	Krtcap3		0.298967	0.195038	0.375367	SPIKE	29	4.83	19.33	4	16	4.83	0.5		0.000707	0.00136974	2.13058	1
1565	Limk2		0.298493	0.195308	0.375367	SPIKE	22	0	12.38	0	13.5	5.5	0.25		0.00072	0.00138806	2.16822	1
1630	Lrrc9		0.298425	0.195308	0.375367	SPIKE	18	6	15	8	20	6	0.5		0.000721	0.00138906	2.17371	1
1739	Morc2a		0.298146	0.195308	0.375367	SPIKE	24	22	10	22	10	8	0.5		0.000729	0.00140085	2.19612	1
1919	Nol9		0.298425	0.195308	0.375367	SPIKE	27	0	11.81	0	10.5	6.75	0.75		0.000721	0.00138906	2.17371	1
2235	Rab37		0.298782	0.195298	0.375367	NSPIKE	28	16.92	4.67	14.5	4	21	0.25		0.000712	0.0013758	2.14518	1
2247	Ralgds		0.298874	0.195298	0.375367	ACOS	35	8.75	17.5	6	12	35	0.75		0.00071	0.00137283	2.13797	1
2551	Slc9a5		0.298848	0.195298	0.375367	SPIKE	25	0	12.5	0	12	8.33	0.5		0.00071	0.00137331	2.14002	1
3127	Zfp595		0.298516	0.195308	0.375367	SPIKE	24	2	12.5	2	12.5	6	0.75		0.000719	0.00138773	2.16641	1
3131	Zfp626		0.298643	0.195298	0.375367	ACOS	20	8.33	8.33	10	10	20	0		0.000716	0.00138209	2.15629	1
16	2610318N02Rik		0.297263	0.201178	0.381271	NSPIKE	22	18.33	7.33	20	8	16.5	0.5		0.000753	0.00143341	2.26875	1
129	Afg1l		0.297	0.201478	0.381271	SPIKE	18	0	9	0	12	3	0.5		0.00076	0.00143964	2.29082	1
142	Akap13		0.297164	0.201388	0.381271	SPIKE	22	0	12.38	0	13.5	5.5	0.25		0.000756	0.0014352	2.277	1
181	Ap5b1		0.297885	0.200108	0.381271	SPIKE	18	9	1.12	12	1.5	4.5	0.25		0.000736	0.00141338	2.21741	1
184	Apba3		0.297055	0.201388	0.381271	SPIKE	26	0	14.62	0	13.5	6.5	0.25		0.000759	0.00143893	2.28619	1
774	Elac2		0.296966	0.201478	0.381271	SPIKE	20	5	16.25	6	19.5	5	0.25		0.000761	0.00144058	2.29366	1
829	F8		0.297434	0.201178	0.381271	SPIKE	20	13.33	4.58	16	5.5	5	0.25		0.000748	0.00142953	2.25453	1
846	Fam210a		0.297802	0.200228	0.381271	SPIKE	25	2.08	14.58	2	14	8.33	0.5		0.000738	0.00141622	2.22421	1
854	Fan1		0.297014	0.201388	0.381271	SPIKE	24	12	0	12	0	8	0.5		0.00076	0.00143964	2.2896	1
1164	Gm4471		0.297214	0.201388	0.381271	NSPIKE	19	11.48	3.17	14.5	4	14.25	0.25		0.000754	0.00143463	2.2728	1
1205	Gm6960		0.297263	0.201178	0.381271	NSPIKE	22	18.33	7.33	20	8	16.5	0.5		0.000753	0.00143341	2.26875	1
[truncated: 1,524 more rows]
